# Supplementary material for: Rationale design and synthesis of new apoptotic thiadiazole derivatives targeting VEGFR-2: computational and in vitro studies
Source: Royal Society of Chemistry journal article supplement (doi:10.1039/d3ra07562a), 2023-01-01
Supplement: d3ra07562a1.pdf [file d3ra07562a1.pdf]

## Rationale Design and Synthesis of Novel Apoptotic Thiadiazole Analogues Targeting VEGFR-2: Computational and *In vitro* studies

Walid E. Elgammal<sup>a</sup>, Hazem Elkady<sup>b</sup>, Hazem A. Mahdy<sup>b</sup>, Dalal Z. Husein<sup>c</sup>, Aisha A. Alsfook<sup>d</sup>,  
Bshra A. Alsfook<sup>d</sup>, Ibrahim M. Ibrahim<sup>e</sup>, Eslam B. Elkaeed<sup>f</sup>, Ahmed M. Metwaly<sup>g,h\*</sup>, Ibrahim H.  
Eissa<sup>b\*</sup>

<sup>a</sup> Department of Chemistry, Faculty of Science, Al-Azhar University, Nasr City, Cairo, Egypt

<sup>b</sup> Pharmaceutical Medicinal Chemistry & Drug Design Department, Faculty of Pharmacy (Boys), Al-Azhar University, Cairo, 11884, Egypt.

<sup>c</sup> Chemistry Department, Faculty of Science, New Valley University, El-Kharja 72511, Egypt.

<sup>d</sup> Department of Pharmaceutical Sciences, College of Pharmacy, Princess Nourah bint Abdulrahman University, P.O. Box 84428, Riyadh 11671, Saudi Arabia.

<sup>e</sup> Biophysics Department, Faculty of Science, Cairo University. Cairo 12613, Egypt.

<sup>f</sup> Department of Pharmaceutical Sciences, College of Pharmacy, AlMaarefa University, Riyadh 13713, Saudi Arabia.

<sup>g</sup> Pharmacognosy and Medicinal Plants Department, Faculty of Pharmacy (Boys), Al-Azhar University, Cairo 11884, Egypt.

<sup>h</sup> Biopharmaceutical Products Research Department, Genetic Engineering and Biotechnology Research Institute, City of Scientific Research and Technological Applications (SRTA-City), Alexandria, Egypt.

### \*Corresponding authors:

#### **Ibrahim H. Eissa**

Medicinal Chemistry Department, Faculty of Pharmacy (Boys), Al-Azhar University, Cairo 11884, Egypt. **Email:** [ibrahimeissa@azhar.edu.eg](mailto:ibrahimeissa@azhar.edu.eg)

#### **Ahmed M. Metwaly**

Pharmacognosy and Medicinal Plants Department, Faculty of Pharmacy (Boys), Al-Azhar University, Cairo 11884, Egypt. **Email:** [ametwaly@azhar.edu.eg](mailto:ametwaly@azhar.edu.eg)

**Eslam B. Elkaeed:** Department of Pharmaceutical Sciences, College of Pharmacy, AlMaarefa University, Riyadh 13713, Saudi Arabia. **Email:** [ekaheed@um.edu.sa](mailto:ekaheed@um.edu.sa)

| <b>Content</b>                       |
|--------------------------------------|
| <b>S1. Chemistry</b>                 |
| <b>S2. Biological testing</b>        |
| <b>S.3. <i>In silico</i> studies</b> |
| <b>S.4. Spectral data</b>            |

| <b>Lab code</b> | <b>Paper code</b> |
|-----------------|-------------------|
| WA1             | <b>14</b>         |
| PH1             | <b>18a</b>        |
| PH4             | <b>18b</b>        |
| WC1             | <b>18c</b>        |
| WC4             | <b>18d</b>        |
| WM1             | <b>18e</b>        |
| WM4             | <b>18f</b>        |

### **S.1. Chemistry**

The chemicals, reagents, and reaction solvents used in this study were gained from Sigma-Aldrich, Alpha Chem, Fluka, and Loba and were not purified further. The melting points (mp), which have not been corrected, were measured using the SMP50 Digital Melting Point App provided by Bibby Scientific in Staffordshire. A Thermo Fisher Nicolet IS10 spectrophotometer was used to detect infrared spectra as solids on the potassium bromide disc ( $\nu_{\max}$  in  $\text{cm}^{-1}$ ) with a resolution of  $4.0 \text{ cm}^{-1}$ , covering  $4000\text{-}400 \text{ cm}^{-1}$ .  $^1\text{H-NMR}$  and  $^{13}\text{C-NMR}$  spectra (400 and 101 MHz) were recorded at the JNM-ECA 500 II Made by JEOL-JAPAN instrument through a solution of deuterated dimethyl sulfoxide. Proton chemical shifts are labeled in part per million (ppm), downfield from tetramethyl silane (TMS,  $\delta=0$ ) as an internal standard, and the following abbreviations (or a combination thereof) are used to describe splitting patterns: s, singlet; d, doublet; t, triplet; q, quartet; m, multiplet, and br, broad. The internal references used were the residual protons (2.50, 3.33 ppm for  $^1\text{H}$  NMR, and 39.9 ppm for  $^{13}\text{C}$  NMR). Mass spectra were measured with a Thermo Scientific

GCMS model (Isq Lt) using the Thermo X-Calibur software (Shimadzu, Kyoto, Japan) at the Regional Center for Mycology and Biotechnology (RCMB), Al-Azhar University, Nasr City, Cairo, Egypt. Elemental studies were conducted at the Regional Center for Microbiology and Biotechnology, Al-Azhar University, Cairo, Egypt, with results accurate to within 0.4%. Thin-layer chromatography (TLC) was carried out on silica gel plates by using DCM: MeOH (95:5%), as the eluting system. The progress of the reaction and evaluation of product purity was determined using a UV indicator at 254 nm.

## **S2. Biological testing**

### **S.2.1. *In vitro* anti-proliferative activity**

#### **S.2.1.1. Determination of sample cytotoxicity on cells (MTT protocol)**

- 1-The 96 well tissue culture plate was inoculated with  $1 \times 10^5$  cells / ml (100 ul / well) and incubated at 37°C for 24 hours to develop a complete monolayer sheet.
- 2- Growth medium was decanted from 96 well micro titer plates after confluent sheet of cells were formed, cell monolayer was washed twice with wash media.
- 3- two-fold dilutions of tested sample was made in RPMI medium with 2% serum (maintenance medium).
- 4- 0.1 ml of each dilution was tested in different wells leaving 3 wells as control, receiving only maintenance medium.
- 5- Plate was incubated at 37°C and examined. Cells were checked for any physical signs of toxicity, e.g. partial or complete loss of the monolayer, rounding, shrinkage, or cell granulation.
- 6- MTT solution was prepared (5mg/ml in PBS) (BIO BASIC CANADA INC).
- 8- 20ul MTT solution were added to each well. Place on a shaking table, 150rpm for 5 minutes, to thoroughly mix the MTT into the media.
- 9) Incubate (37C, 5% CO<sub>2</sub>) for 4 hours to allow the MTT to be metabolized.
- 10) Dump off the media. (dry plate on paper towels to remove residue if necessary.
- 11) Resuspend formazan (MTT metabolic product) in 200ul DMSO. Place on a shaking table, 150rpm for 5 minutes, to thoroughly mix the formazan into the solvent.
- 12) Read optical density at 560nm and subtract background at 620nm. Optical density should be directly correlated with cell quantity.

### S.2.1.2. Morphological assay

- ❖ Large-scale, morphological changes that occur at the cell surface, or in the cytoskeleton, can be followed and related to cell viability.
- ❖ Damage can be identified by large decreases in volume secondary to losses in protein and intracellular ions of due to altered permeability to sodium or potassium.
- ❖ Necrotic cells: nuclear swelling, chromatin flocculation, loss of nuclear basophilia
- ❖ Apoptotic cells: cell shrinkage, nuclear condensation, nuclear fragmentation

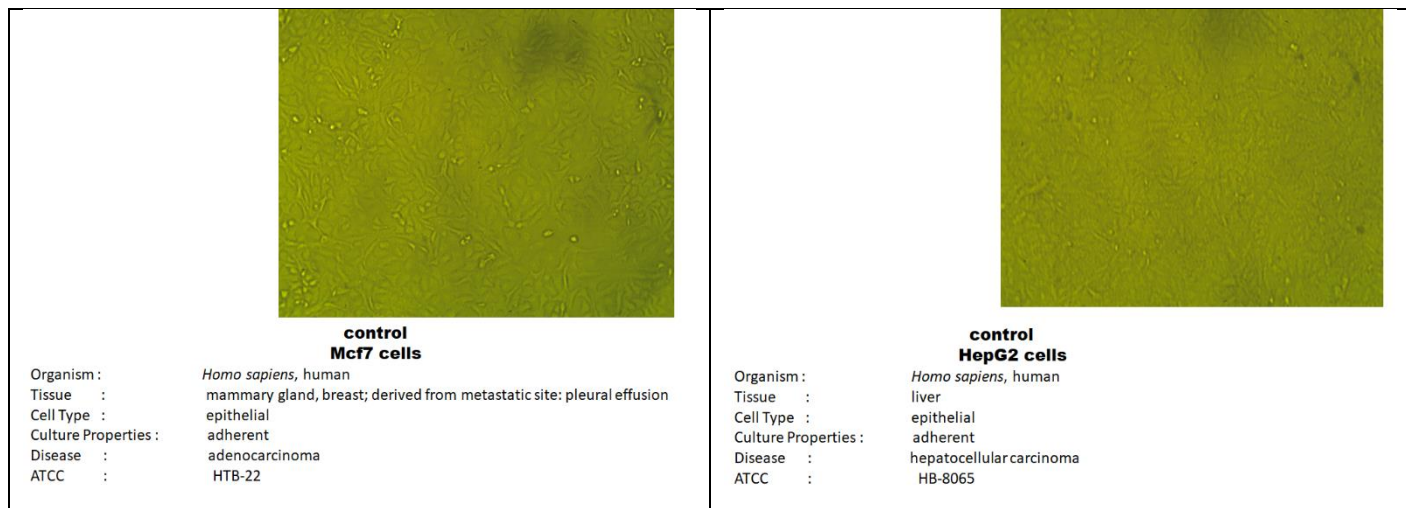

### \*\*\* Cytotoxicity of WA1 (compound 14) against MCF-7 and HepG2

| ID    | uM    | O.D   |       |       | Mean<br>O.D | ±SE         | Viability % | Toxicity %  | IC <sub>50</sub><br>± SD |
|-------|-------|-------|-------|-------|-------------|-------------|-------------|-------------|--------------------------|
| MCF-7 | ----- | 0.772 | 0.768 | 0.779 | 0.773       | 0.003215    | 100         | 0           | uM                       |
| WA1   | 10    | 0.053 | 0.048 | 0.055 | 0.052       | 0.002082    | 6.727037516 | 93.27296248 | 0.04 ±<br>0.01           |
|       | 5     | 0.05  | 0.05  | 0.047 | 0.049       | 0.001       | 6.338939198 | 93.6610608  |                          |
|       | 2.5   | 0.056 | 0.055 | 0.051 | 0.054       | 0.001528    | 6.985769728 | 93.01423027 |                          |
|       | 1.25  | 0.056 | 0.049 | 0.055 | 0.053333    | 0.002186    | 6.899525658 | 93.10047434 |                          |
|       | 0.625 | 0.048 | 0.042 | 0.048 | 0.046       | 0.002       | 5.95084088  | 94.04915912 |                          |
|       | 0.312 | 0.049 | 0.055 | 0.053 | 0.052333    | 0.001764    | 6.770159552 | 93.22984045 |                          |
|       | 0.156 | 0.163 | 0.152 | 0.133 | 0.149333    | 0.008762    | 19.31867184 | 80.68132816 |                          |
|       | 0.078 | 0.367 | 0.342 | 0.359 | 0.356       | 0.007371    | 46.05433376 | 53.94566624 |                          |
|       | 5     | 0.173 | 0.156 | 0.162 | 0.163667    | 0.004978    | 21.17291936 | 78.82708064 |                          |
|       | 2.5   | 0.263 | 0.269 | 0.271 | 0.267667    | 0.002404    | 34.62699439 | 65.37300561 |                          |
|       | 1.25  | 0.388 | 0.367 | 0.393 | 0.382667    | 0.007965    | 49.50409659 | 50.49590341 |                          |
|       | 0.625 | 0.659 | 0.678 | 0.666 | 0.667667    | 0.005548    | 86.37343683 | 13.62656317 |                          |
| 0.312 | 0.771 | 0.764 | 0.778 | 0.771 | 0.004041    | 99.74126779 | 0.258732212 |             |                          |



| ID    | uM    | O.D   |       |       | Mean O.D | ±SE      | Viability % | Toxicity %  | IC <sub>50</sub> ± SD |
|-------|-------|-------|-------|-------|----------|----------|-------------|-------------|-----------------------|
| HepG2 | ----- | 0.742 | 0.728 | 0.732 | 0.734    | 0.004163 | 100         | 0           | uM                    |
| WA1   | 10    | 0.043 | 0.047 | 0.044 | 0.044667 | 0.001202 | 6.08537693  | 93.91462307 | 0.18 ± 0              |
|       | 5     | 0.045 | 0.046 | 0.045 | 0.045333 | 0.000333 | 6.176203451 | 93.82379655 |                       |
|       | 2.5   | 0.042 | 0.039 | 0.044 | 0.041667 | 0.001453 | 5.676657584 | 94.32334242 |                       |
|       | 1.25  | 0.037 | 0.041 | 0.036 | 0.038    | 0.001528 | 5.177111717 | 94.82288828 |                       |
|       | 0.625 | 0.037 | 0.039 | 0.038 | 0.038    | 0.000577 | 5.177111717 | 94.82288828 |                       |
|       | 0.312 | 0.11  | 0.093 | 0.106 | 0.103    | 0.005132 | 14.03269755 | 85.96730245 |                       |
|       | 0.156 | 0.289 | 0.261 | 0.277 | 0.275667 | 0.00811  | 37.55676658 | 62.44323342 |                       |
|       | 0.078 | 0.683 | 0.651 | 0.669 | 0.667667 | 0.009262 | 90.96276113 | 9.037238874 |                       |

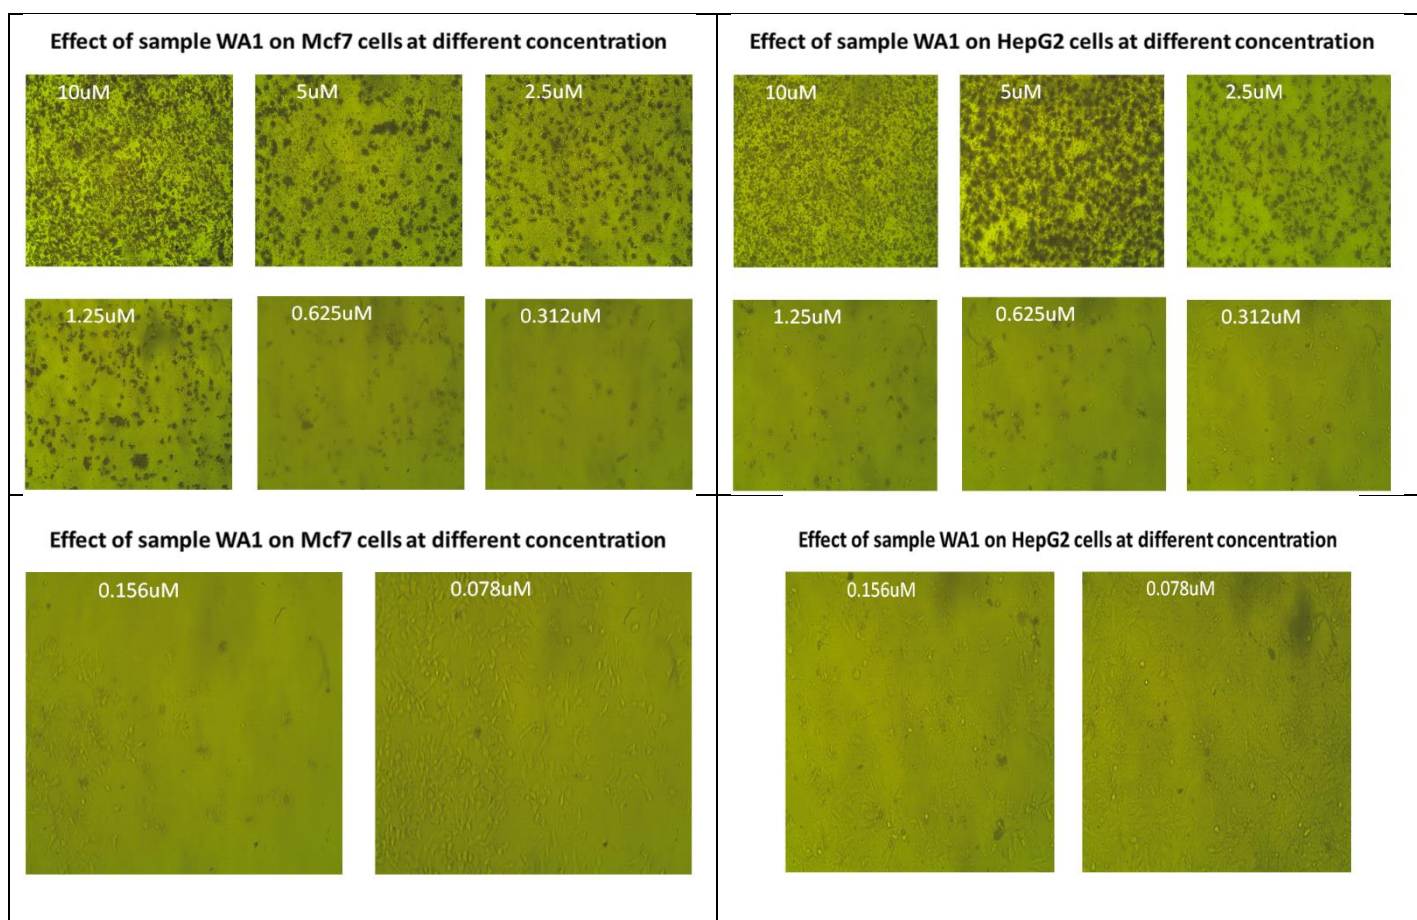

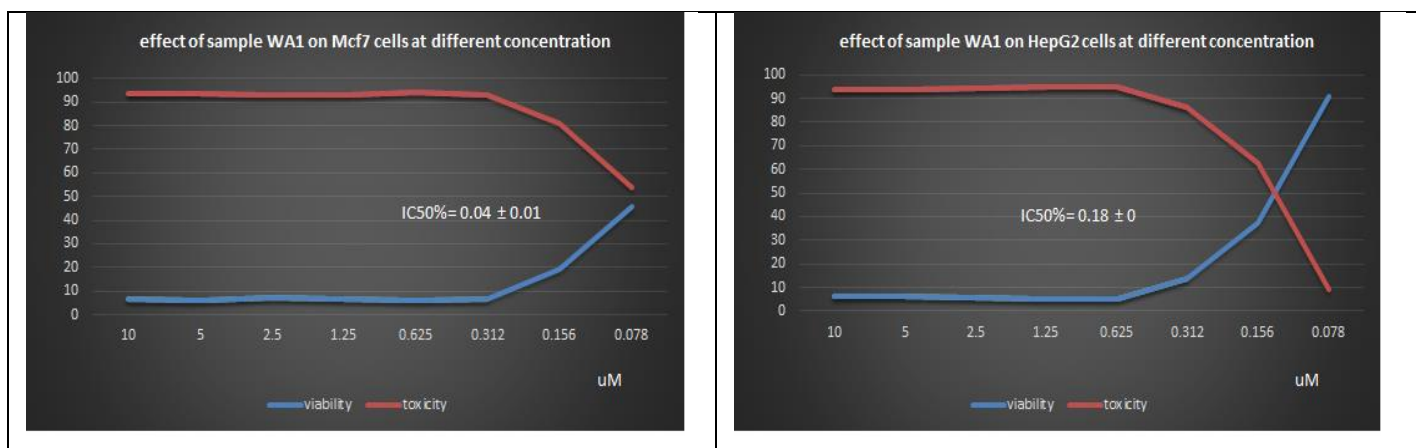

**\*\*\* Cytotoxicity of PH-1 (compound 18a) against MCF-7 and HepG2**

| ID    | uM    | O.D   |       |       | Mean O.D | ±SE      | Viability % | Toxicity %  | IC <sub>50</sub> ± SD |
|-------|-------|-------|-------|-------|----------|----------|-------------|-------------|-----------------------|
| MCF-7 | ----- | 0.772 | 0.768 | 0.779 | 0.773    | 0.003215 | 100         | 0           | uM                    |
| PH1   | 10    | 0.02  | 0.018 | 0.019 | 0.019    | 0.000577 | 2.457956016 | 97.54204398 | 0.16 ± 0              |
|       | 5     | 0.019 | 0.018 | 0.021 | 0.019333 | 0.000882 | 2.501078051 | 97.49892195 |                       |
|       | 2.5   | 0.019 | 0.022 | 0.018 | 0.019667 | 0.001202 | 2.544200086 | 97.45579991 |                       |
|       | 1.25  | 0.02  | 0.024 | 0.019 | 0.021    | 0.001528 | 2.716688228 | 97.28331177 |                       |
|       | 0.625 | 0.018 | 0.023 | 0.022 | 0.021    | 0.001528 | 2.716688228 | 97.28331177 |                       |
|       | 0.312 | 0.035 | 0.042 | 0.039 | 0.038667 | 0.002028 | 5.002156102 | 94.9978439  |                       |
|       | 0.156 | 0.264 | 0.277 | 0.293 | 0.278    | 0.008386 | 35.96377749 | 64.03622251 |                       |
|       | 0.078 | 0.673 | 0.7   | 0.682 | 0.685    | 0.007937 | 88.61578266 | 11.38421734 |                       |

| ID    | uM    | O.D   |       |       | Mean O.D | ±SE      | Viability % | Toxicity %  | IC <sub>50</sub> ± SD |
|-------|-------|-------|-------|-------|----------|----------|-------------|-------------|-----------------------|
| HepG2 | ----- | 0.742 | 0.728 | 0.732 | 0.734    | 0.004163 | 100         | 0           | uM                    |
| PH1   | 10    | 0.024 | 0.022 | 0.023 | 0.023    | 0.000577 | 3.133514986 | 96.86648501 | 0.8 ± 0               |
|       | 5     | 0.022 | 0.019 | 0.026 | 0.022333 | 0.002028 | 3.042688465 | 96.95731153 |                       |
|       | 2.5   | 0.02  | 0.02  | 0.021 | 0.020333 | 0.000333 | 2.770208901 | 97.2297911  |                       |
|       | 1.25  | 0.183 | 0.189 | 0.192 | 0.188    | 0.002646 | 25.61307902 | 74.38692098 |                       |
|       | 0.625 | 0.385 | 0.362 | 0.358 | 0.368333 | 0.008413 | 50.18165304 | 49.81834696 |                       |
|       | 0.312 | 0.668 | 0.652 | 0.648 | 0.656    | 0.00611  | 89.373297   | 10.626703   |                       |

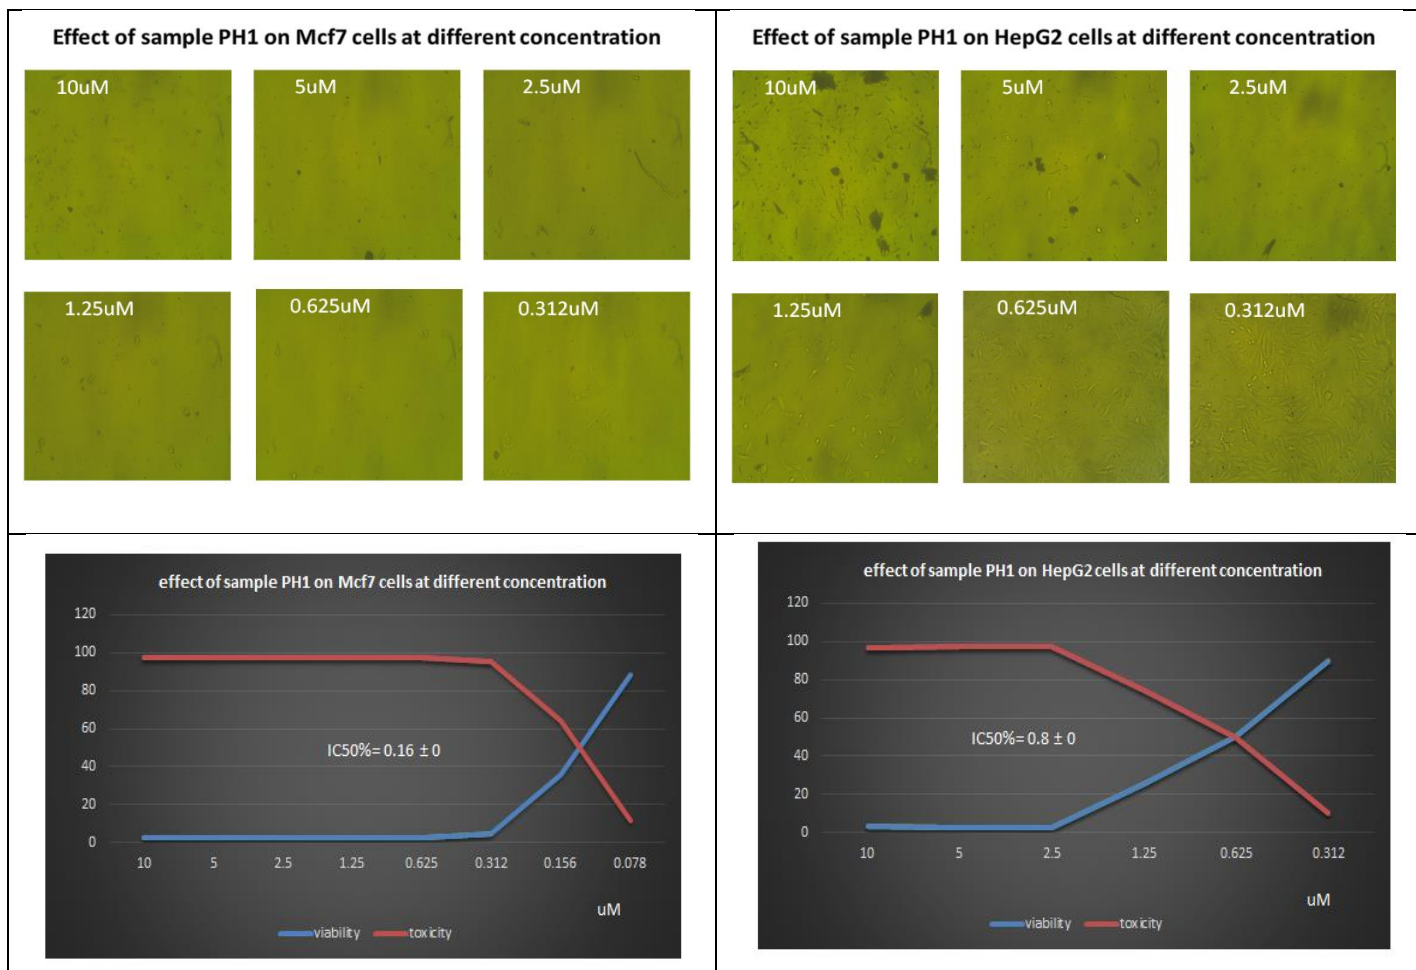

**\*\*\* Cytotoxicity of PH-4 (compound 18b) against MCF-7 and HepG2**

| ID    | uM    | O.D   |       |       | Mean O.D | ±SE         | Viability % | Toxicity %  | IC <sub>50</sub> ± SD |
|-------|-------|-------|-------|-------|----------|-------------|-------------|-------------|-----------------------|
| MCF-7 | ----- | 0.772 | 0.768 | 0.779 | 0.773    | 0.003215    | 100         | 0           | uM                    |
| PH4   | 10    | 0.036 | 0.038 | 0.038 | 0.037433 | 0.000722    | 4.842604571 | 95.15739543 | 0.22 ± 0              |
|       | 5     | 0.039 | 0.038 | 0.039 | 0.038667 | 0.000333    | 5.002156102 | 94.9978439  |                       |
|       | 2.5   | 0.03  | 0.036 | 0.038 | 0.034667 | 0.002404    | 4.484691677 | 95.51530832 |                       |
|       | 1.25  | 0.036 | 0.035 | 0.036 | 0.035667 | 0.000333    | 4.614057784 | 95.38594222 |                       |
|       | 0.625 | 0.085 | 0.074 | 0.11  | 0.089667 | 0.010651    | 11.59982751 | 88.40017249 |                       |
|       | 0.312 | 0.163 | 0.128 | 0.154 | 0.148333 | 0.010493    | 19.18930574 | 80.81069426 |                       |
|       | 0.156 | 0.584 | 0.542 | 0.561 | 0.562333 | 0.012143    | 72.74687365 | 27.25312635 |                       |
|       | 0.078 | 0.77  | 0.765 | 0.774 | 0.769667 | 0.002603    | 99.56877965 | 0.431220354 |                       |
|       | 5     | 0.034 | 0.035 | 0.033 | 0.034    | 0.000577    | 4.398447607 | 95.60155239 |                       |
|       | 2.5   | 0.034 | 0.034 | 0.036 | 0.034667 | 0.000667    | 4.484691677 | 95.51530832 |                       |
|       | 1.25  | 0.032 | 0.036 | 0.034 | 0.034    | 0.001155    | 4.398447607 | 95.60155239 |                       |
|       | 0.625 | 0.03  | 0.028 | 0.03  | 0.029333 | 0.000667    | 3.794739112 | 96.20526089 |                       |
|       | 0.312 | 0.032 | 0.036 | 0.028 | 0.032    | 0.002309    | 4.139715395 | 95.86028461 |                       |
|       | 0.156 | 0.177 | 0.19  | 0.164 | 0.177    | 0.007506    | 22.89780078 | 77.10219922 |                       |
| 0.078 | 0.38  | 0.362 | 0.389 | 0.377 | 0.007937 | 48.77102199 | 51.22897801 |             |                       |

| ID    | uM    | O.D   |       |       | Mean O.D | ±SE         | Viability % | Toxicity %  | IC <sub>50</sub> ± SD |
|-------|-------|-------|-------|-------|----------|-------------|-------------|-------------|-----------------------|
| HepG2 | ----- | 0.742 | 0.728 | 0.732 | 0.734    | 0.004163    | 100         | 0           | uM                    |
| PH4   | 10    | 0.025 | 0.028 | 0.026 | 0.026333 | 0.000882    | 3.587647593 | 96.41235241 | 0.2 ± 0               |
|       | 5     | 0.023 | 0.025 | 0.021 | 0.023    | 0.001155    | 3.133514986 | 96.86648501 |                       |
|       | 2.5   | 0.026 | 0.023 | 0.025 | 0.024667 | 0.000882    | 3.36058129  | 96.63941871 |                       |
|       | 1.25  | 0.035 | 0.032 | 0.03  | 0.032333 | 0.001453    | 4.405086285 | 95.59491371 |                       |
|       | 0.625 | 0.028 | 0.026 | 0.029 | 0.027667 | 0.000882    | 3.769300636 | 96.23069936 |                       |
|       | 0.312 | 0.099 | 0.116 | 0.105 | 0.106667 | 0.004978    | 14.53224342 | 85.46775658 |                       |
|       | 0.156 | 0.413 | 0.386 | 0.394 | 0.397667 | 0.008007    | 54.17801998 | 45.82198002 |                       |
|       | 0.078 | 0.736 | 0.73  | 0.727 | 0.731    | 0.002646    | 99.59128065 | 0.408719346 |                       |
|       | 5     | 0.03  | 0.027 | 0.027 | 0.028    | 0.001       | 3.814713896 | 96.1852861  |                       |
|       | 2.5   | 0.021 | 0.02  | 0.022 | 0.021    | 0.000577    | 2.861035422 | 97.13896458 |                       |
|       | 1.25  | 0.02  | 0.019 | 0.024 | 0.021    | 0.001528    | 2.861035422 | 97.13896458 |                       |
|       | 0.625 | 0.023 | 0.021 | 0.022 | 0.022    | 0.000577    | 2.997275204 | 97.0027248  |                       |
|       | 0.312 | 0.022 | 0.021 | 0.026 | 0.023    | 0.001528    | 3.133514986 | 96.86648501 |                       |
|       | 0.156 | 0.264 | 0.289 | 0.291 | 0.281333 | 0.008686    | 38.32879201 | 61.67120799 |                       |
| 0.078 | 0.673 | 0.642 | 0.668 | 0.661 | 0.009609 | 90.05449591 | 9.945504087 |             |                       |

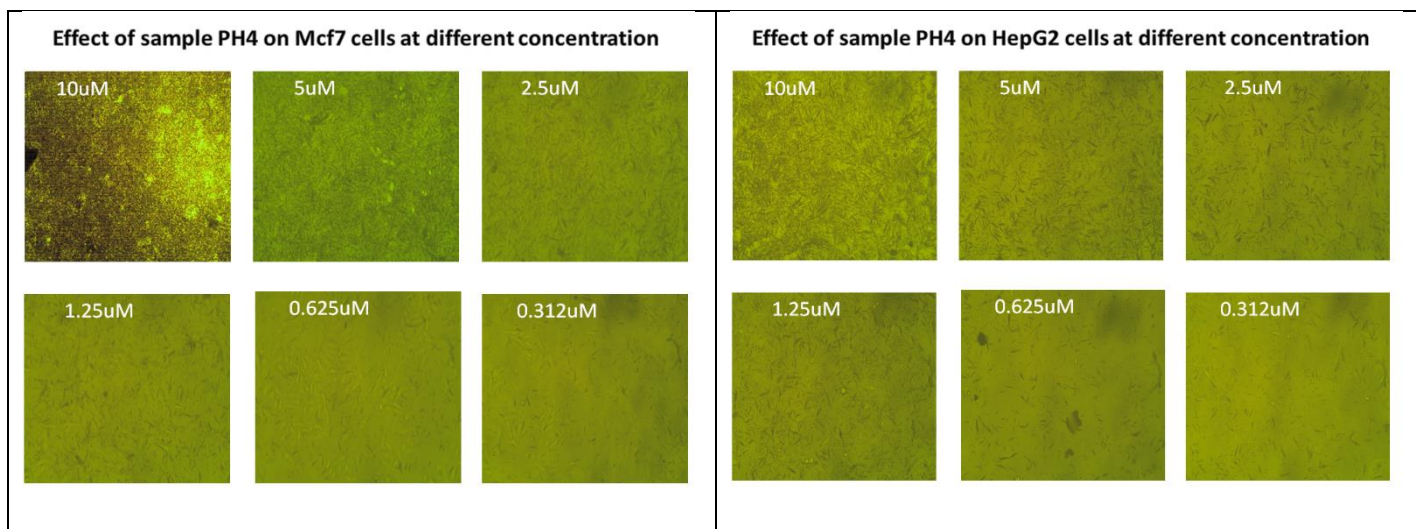



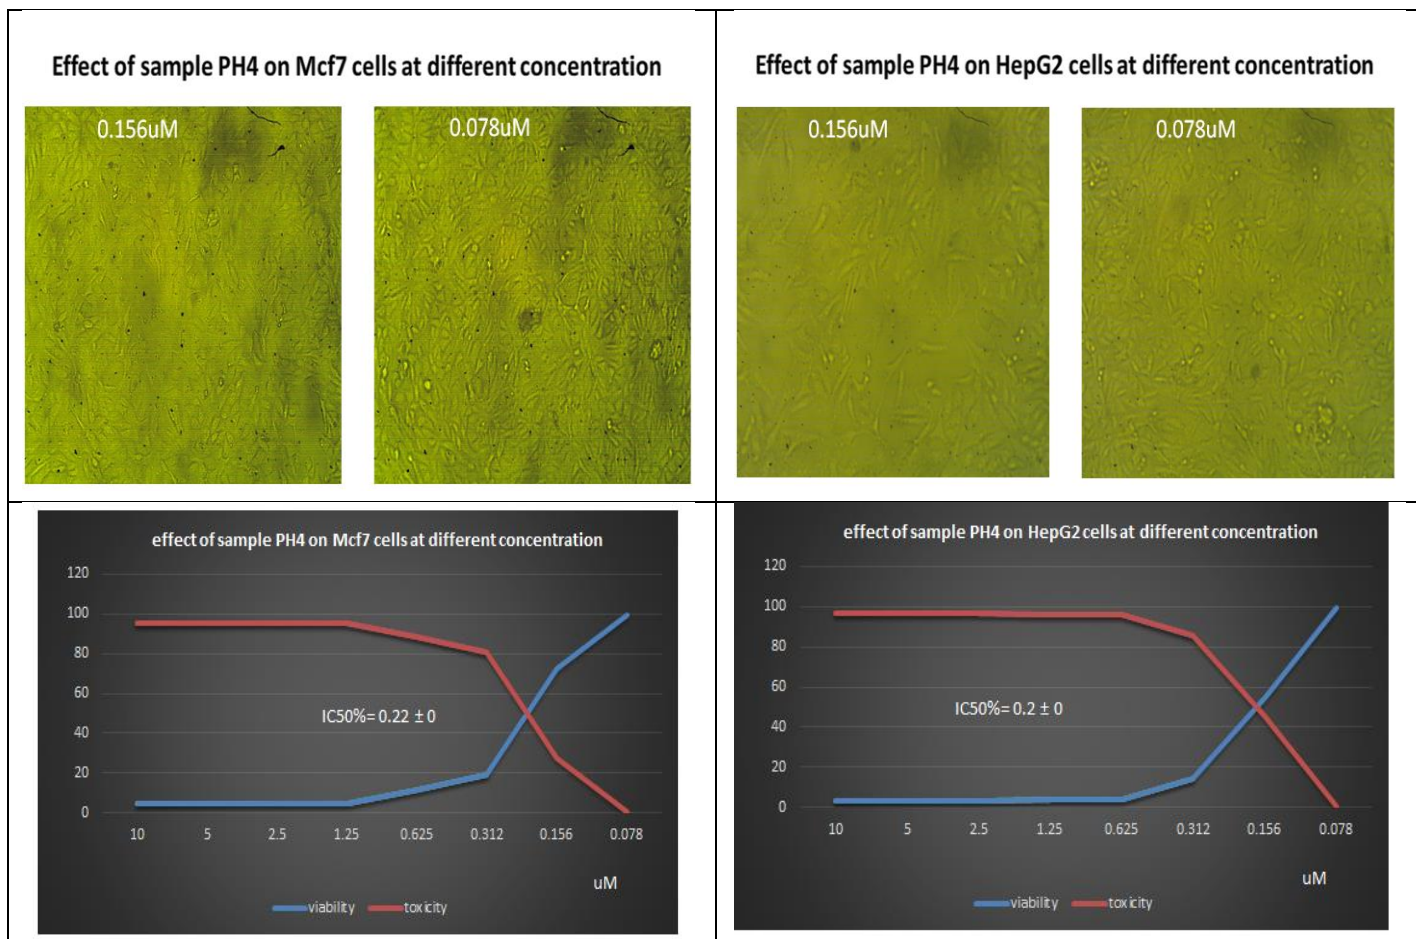

**\*\*\* Cytotoxicity of WC-1 (compound 18c) against MCF-7 and HepG2**

| ID    | uM    | O.D   |       |       | Mean O.D | ±SE      | Viability % | Toxicity %  | IC <sub>50</sub> ± SD |
|-------|-------|-------|-------|-------|----------|----------|-------------|-------------|-----------------------|
| MCF-7 | ----- | 0.772 | 0.768 | 0.779 | 0.773    | 0.003215 | 100         | 0           | uM                    |
| WC1   | 10    | 0.027 | 0.028 | 0.026 | 0.027    | 0.000577 | 3.492884864 | 96.50711514 | 0.19 ± 0              |
|       | 5     | 0.029 | 0.027 | 0.03  | 0.028667 | 0.000882 | 3.708495041 | 96.29150496 |                       |
|       | 2.5   | 0.052 | 0.048 | 0.05  | 0.05     | 0.001155 | 6.468305304 | 93.5316947  |                       |
|       | 1.25  | 0.083 | 0.059 | 0.062 | 0.068    | 0.00755  | 8.796895213 | 91.20310479 |                       |
|       | 0.625 | 0.094 | 0.088 | 0.091 | 0.091    | 0.001732 | 11.77231565 | 88.22768435 |                       |
|       | 0.312 | 0.198 | 0.216 | 0.201 | 0.205    | 0.005568 | 26.52005175 | 73.47994825 |                       |
|       | 0.156 | 0.365 | 0.381 | 0.374 | 0.373333 | 0.004631 | 48.2966796  | 51.7033204  |                       |
|       | 0.078 | 0.655 | 0.639 | 0.672 | 0.655333 | 0.009528 | 84.77792152 | 15.22207848 |                       |
|       | 0.312 | 0.768 | 0.777 | 0.771 | 0.772    | 0.002646 | 99.87063389 | 0.129366106 |                       |

| ID    | uM    | O.D   |       |       | Mean O.D | ±SE      | Viability % | Toxicity %  | IC <sub>50</sub> ± SD |
|-------|-------|-------|-------|-------|----------|----------|-------------|-------------|-----------------------|
| HepG2 | ----- | 0.742 | 0.728 | 0.732 | 0.734    | 0.004163 | 100         | 0           | uM                    |
| WC1   | 10    | 0.044 | 0.048 | 0.043 | 0.045    | 0.001528 | 6.130790191 | 93.86920981 | 0.16 ± 0              |
|       | 5     | 0.045 | 0.046 | 0.044 | 0.045    | 0.000577 | 6.130790191 | 93.86920981 |                       |
|       | 2.5   | 0.043 | 0.041 | 0.045 | 0.043    | 0.001155 | 5.858310627 | 94.14168937 |                       |
|       | 1.25  | 0.046 | 0.04  | 0.04  | 0.042    | 0.002    | 5.722070845 | 94.27792916 |                       |
|       | 0.625 | 0.083 | 0.092 | 0.099 | 0.091333 | 0.004631 | 12.44323342 | 87.55676658 |                       |
|       | 0.312 | 0.108 | 0.094 | 0.109 | 0.103667 | 0.004842 | 14.12352407 | 85.87647593 |                       |
|       | 0.156 | 0.196 | 0.165 | 0.188 | 0.183    | 0.009292 | 24.93188011 | 75.06811989 |                       |
|       | 0.078 | 0.633 | 0.598 | 0.619 | 0.616667 | 0.010171 | 84.01453224 | 15.98546776 |                       |

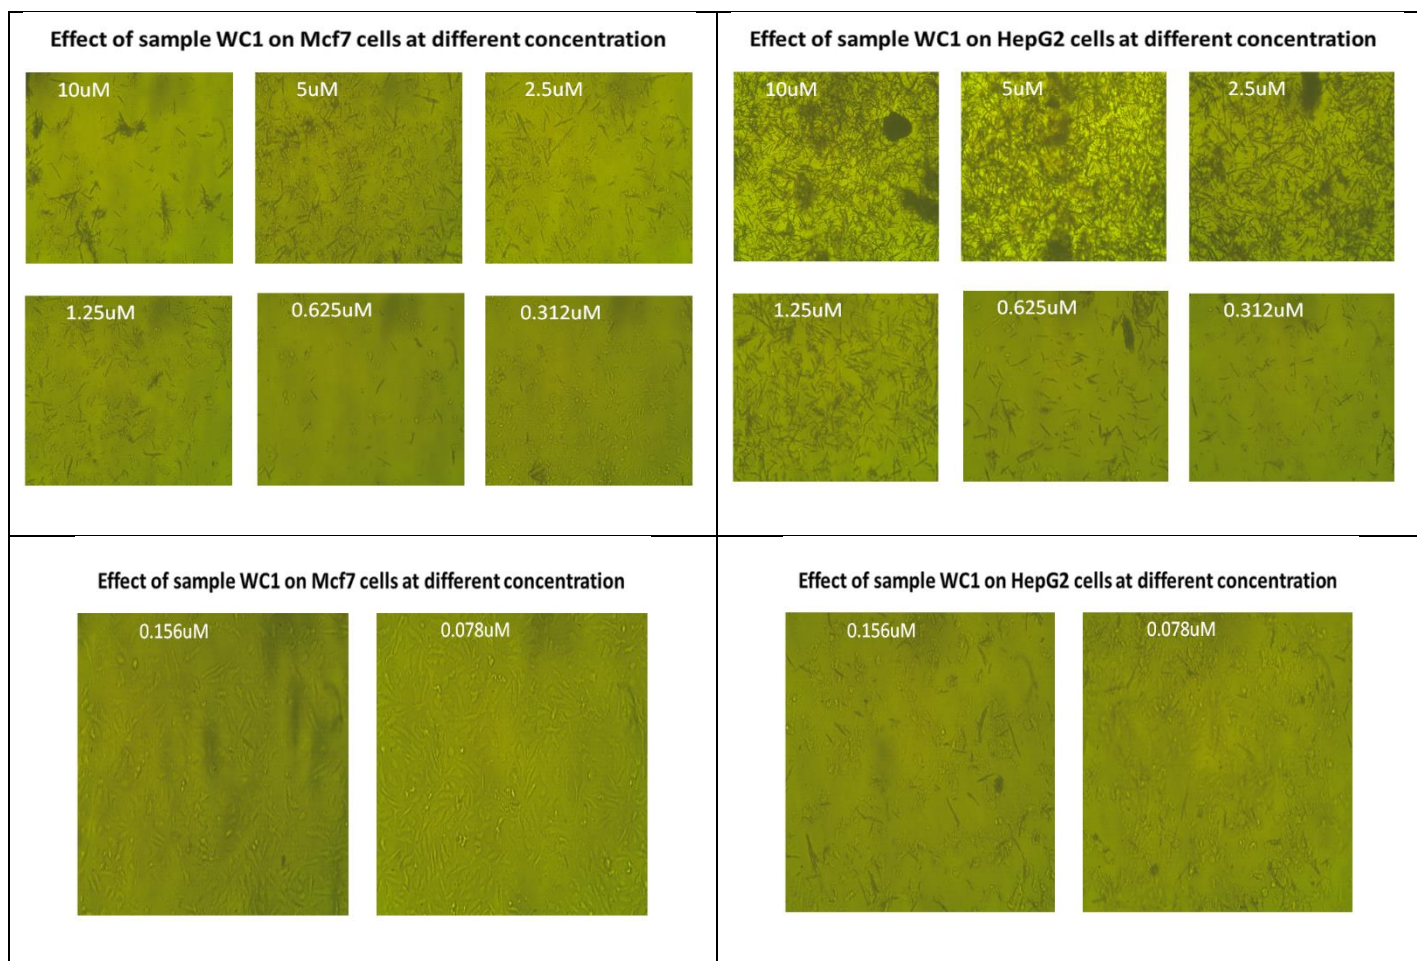

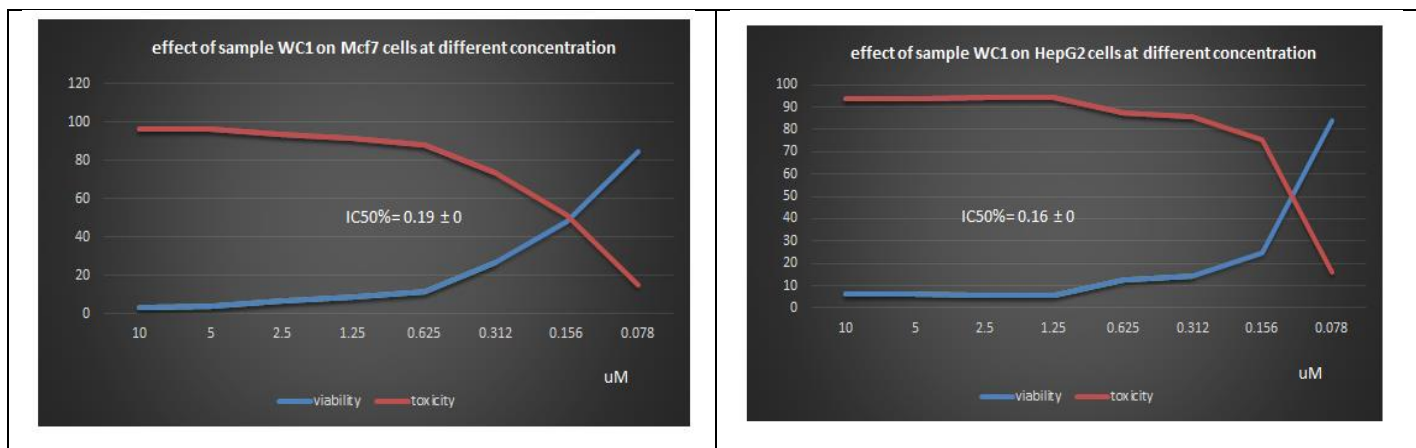

**\*\*\* Cytotoxicity of WC-4 (compound 18d) against MCF-7 and HepG2**

| ID    | uM    | O.D   |       |       | Mean O.D | ±SE      | Viability % | Toxicity %  | IC <sub>50</sub> ± SD |
|-------|-------|-------|-------|-------|----------|----------|-------------|-------------|-----------------------|
| MCF-7 | ----- | 0.772 | 0.768 | 0.779 | 0.773    | 0.003215 | 100         | 0           | uM                    |
| WC4   | 10    | 0.17  | 0.163 | 0.189 | 0.174    | 0.007767 | 22.50970246 | 77.49029754 | 5 ± 0.1               |
|       | 5     | 0.388 | 0.364 | 0.391 | 0.381    | 0.008544 | 49.28848642 | 50.71151358 |                       |
|       | 2.5   | 0.688 | 0.663 | 0.679 | 0.676667 | 0.007311 | 87.53773178 | 12.46226822 |                       |
|       | 1.25  | 0.77  | 0.763 | 0.769 | 0.767333 | 0.002186 | 99.2669254  | 0.733074601 |                       |
|       | 0.625 | 0.775 | 0.77  | 0.771 | 0.772    | 0.001528 | 99.87063389 | 0.129366106 |                       |
|       | 0.312 | 0.768 | 0.777 | 0.771 | 0.772    | 0.002646 | 99.87063389 | 0.129366106 |                       |

| ID    | uM    | O.D   |       |       | Mean O.D | ±SE      | Viability % | Toxicity %  | IC <sub>50</sub> ± SD |
|-------|-------|-------|-------|-------|----------|----------|-------------|-------------|-----------------------|
| HepG2 | ----- | 0.742 | 0.728 | 0.732 | 0.734    | 0.004163 | 100         | 0           | uM                    |
| WC4   | 10    | 0.063 | 0.048 | 0.052 | 0.054333 | 0.004485 | 7.40236149  | 92.59763851 | 6.17 ± 0.01           |
|       | 5     | 0.463 | 0.442 | 0.459 | 0.454667 | 0.006438 | 61.94368756 | 38.05631244 |                       |
|       | 2.5   | 0.673 | 0.682 | 0.67  | 0.675    | 0.003606 | 91.96185286 | 8.038147139 |                       |
|       | 1.25  | 0.698 | 0.714 | 0.704 | 0.705333 | 0.004667 | 96.09445958 | 3.905540418 |                       |
|       | 0.625 | 0.724 | 0.722 | 0.715 | 0.720333 | 0.002728 | 98.13805631 | 1.861943688 |                       |
|       | 0.312 | 0.73  | 0.717 | 0.724 | 0.723667 | 0.003756 | 98.59218892 | 1.407811081 |                       |



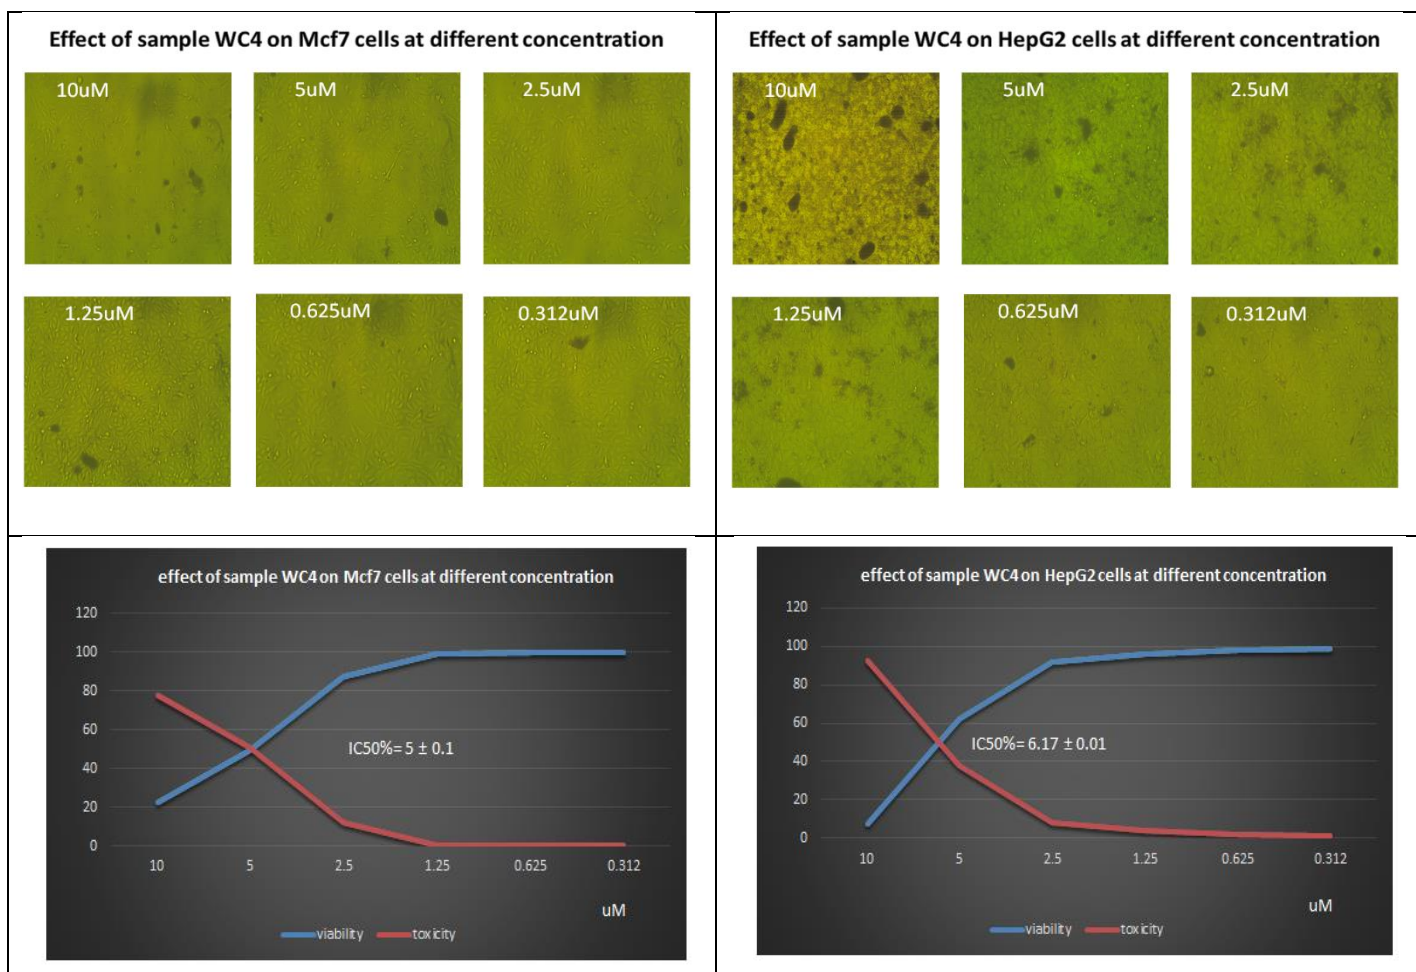

**\*\*\* Cytotoxicity of WM-1 (compound 18e) against MCF-7 and HepG2**

| ID    | uM    | O.D   |       |       | Mean O.D | ±SE         | Viability % | Toxicity %  | IC <sub>50</sub> ± SD |
|-------|-------|-------|-------|-------|----------|-------------|-------------|-------------|-----------------------|
| MCF-7 | ----- | 0.772 | 0.768 | 0.779 | 0.773    | 0.003215    | 100         | 0           | uM                    |
| WM1   | 10    | 0.024 | 0.022 | 0.021 | 0.022333 | 0.000882    | 2.889176369 | 97.11082363 | 0.19 ± 0              |
|       | 5     | 0.022 | 0.026 | 0.023 | 0.023667 | 0.001202    | 3.061664511 | 96.93833549 |                       |
|       | 2.5   | 0.022 | 0.021 | 0.026 | 0.023    | 0.001528    | 2.97542044  | 97.02457956 |                       |
|       | 1.25  | 0.043 | 0.036 | 0.032 | 0.037    | 0.003215    | 4.786545925 | 95.21345408 |                       |
|       | 0.625 | 0.088 | 0.092 | 0.01  | 0.063333 | 0.026692    | 8.193186718 | 91.80681328 |                       |
|       | 0.312 | 0.151 | 0.127 | 0.133 | 0.137    | 0.007211    | 17.72315653 | 82.27684347 |                       |
|       | 0.156 | 0.437 | 0.413 | 0.452 | 0.434    | 0.011358    | 56.14489004 | 43.85510996 |                       |
| 0.078 | 0.674 | 0.668 | 0.641 | 0.661 | 0.010149 | 85.51099612 | 14.48900388 |             |                       |



| ID    | uM    | O.D   |       |       | Mean O.D | ±SE      | Viability % | Toxicity %  | IC <sub>50</sub> ± SD |
|-------|-------|-------|-------|-------|----------|----------|-------------|-------------|-----------------------|
| HepG2 | ----- | 0.742 | 0.728 | 0.732 | 0.734    | 0.004163 | 100         | 0           | uM                    |
| WM1   | 10    | 0.019 | 0.018 | 0.022 | 0.019667 | 0.001202 | 2.67938238  | 97.32061762 | 0.21 ± 0              |
|       | 5     | 0.026 | 0.037 | 0.03  | 0.031    | 0.003215 | 4.223433243 | 95.77656676 |                       |
|       | 2.5   | 0.084 | 0.091 | 0.088 | 0.087667 | 0.002028 | 11.94368756 | 88.05631244 |                       |
|       | 1.25  | 0.093 | 0.099 | 0.103 | 0.098333 | 0.002906 | 13.3969119  | 86.6030881  |                       |
|       | 0.625 | 0.145 | 0.128 | 0.12  | 0.131    | 0.007371 | 17.84741144 | 82.15258856 |                       |
|       | 0.312 | 0.166 | 0.148 | 0.152 | 0.155333 | 0.005457 | 21.16257947 | 78.83742053 |                       |
|       | 0.156 | 0.397 | 0.382 | 0.406 | 0.395    | 0.007    | 53.8147139  | 46.1852861  |                       |
|       | 0.078 | 0.736 | 0.73  | 0.732 | 0.732667 | 0.001764 | 99.81834696 | 0.181653043 |                       |

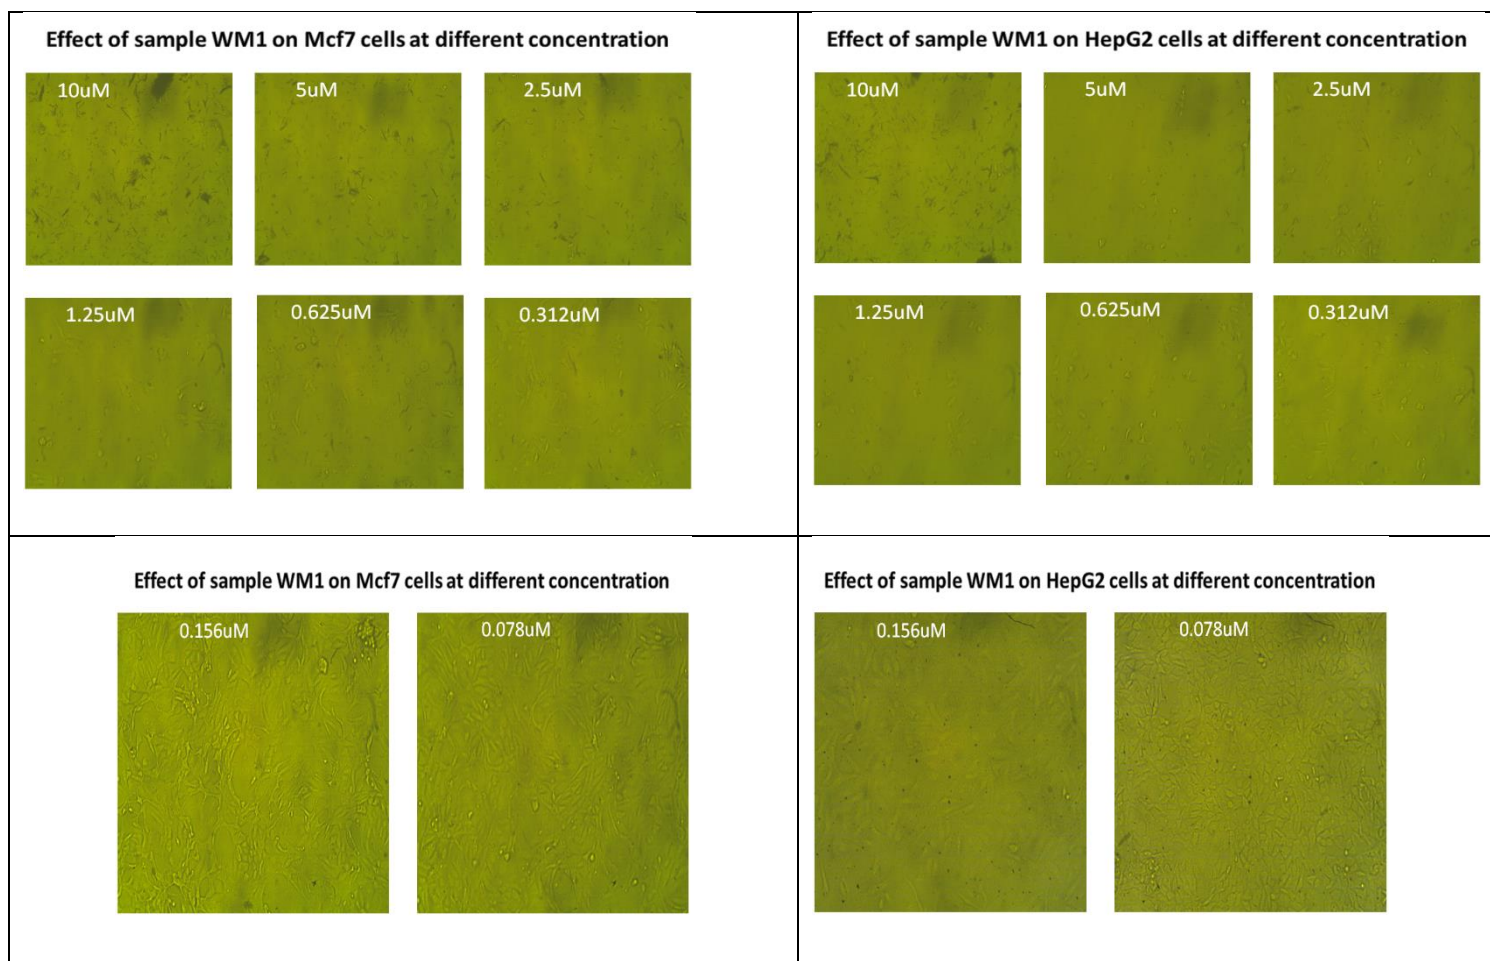

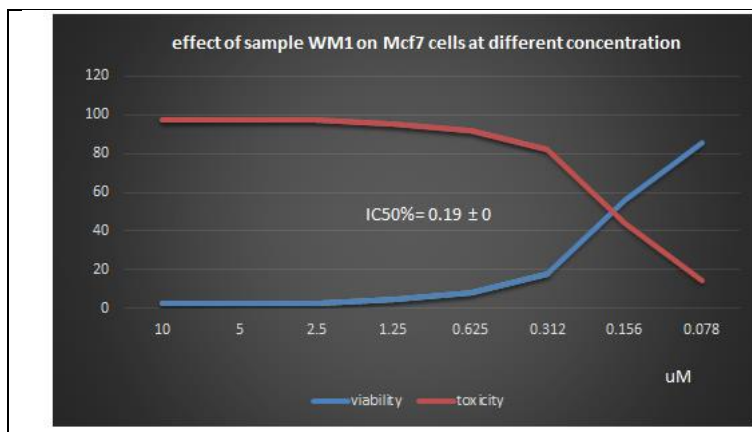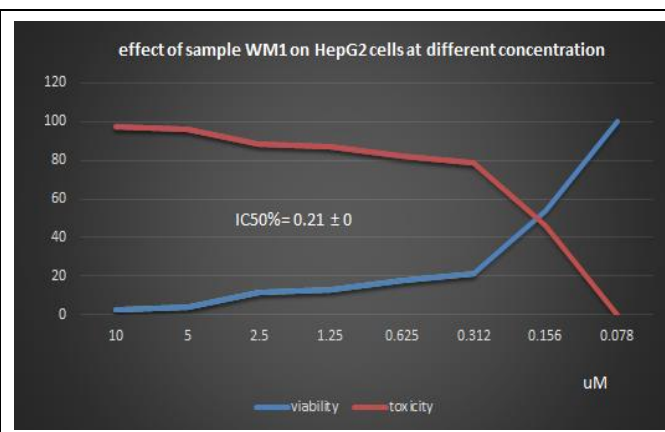

**\*\*\* Cytotoxicity of WM-4 (compound 18f) against MCF-7 and HepG2**

| ID    | uM    | O.D   |       |       | Mean O.D | ±SE      | Viability % | Toxicity %  | IC <sub>50</sub> ± SD |
|-------|-------|-------|-------|-------|----------|----------|-------------|-------------|-----------------------|
| MCF-7 | ----- | 0.772 | 0.768 | 0.779 | 0.773    | 0.003215 | 100         | 0           | uM                    |
| WM4   | 10    | 0.046 | 0.037 | 0.038 | 0.040333 | 0.002848 | 5.217766279 | 94.78223372 | 0.44 ± 0              |
|       | 5     | 0.039 | 0.042 | 0.041 | 0.040667 | 0.000882 | 5.260888314 | 94.73911169 |                       |
|       | 2.5   | 0.064 | 0.059 | 0.061 | 0.061333 | 0.001453 | 7.934454506 | 92.06554549 |                       |
|       | 1.25  | 0.116 | 0.142 | 0.158 | 0.138667 | 0.012238 | 17.93876671 | 82.06123329 |                       |
|       | 0.625 | 0.198 | 0.202 | 0.214 | 0.204667 | 0.004807 | 26.47692971 | 73.52307029 |                       |
|       | 0.312 | 0.453 | 0.473 | 0.461 | 0.462333 | 0.005812 | 59.81026304 | 40.18973696 |                       |
|       | 0.156 | 0.766 | 0.778 | 0.771 | 0.771667 | 0.00348  | 99.82751186 | 0.172488141 |                       |
|       | 0.078 | 0.66  | 0.684 | 0.666 | 0.67     | 0.007211 | 86.67529107 | 13.32470893 |                       |

| ID    | uM    | O.D   |       |       | Mean O.D | ±SE      | Viability % | Toxicity %  | IC <sub>50</sub> ± SD |
|-------|-------|-------|-------|-------|----------|----------|-------------|-------------|-----------------------|
| HepG2 | ----- | 0.742 | 0.728 | 0.732 | 0.734    | 0.004163 | 100         | 0           | uM                    |
| WM4   | 10    | 0.019 | 0.02  | 0.017 | 0.018667 | 0.000882 | 2.543142598 | 97.4568574  | 0.18 ± 0.01           |
|       | 5     | 0.026 | 0.021 | 0.022 | 0.023    | 0.001528 | 3.133514986 | 96.86648501 |                       |
|       | 2.5   | 0.02  | 0.018 | 0.024 | 0.020667 | 0.001764 | 2.815622162 | 97.18437784 |                       |
|       | 1.25  | 0.142 | 0.118 | 0.137 | 0.132333 | 0.007311 | 18.02906449 | 81.97093551 |                       |
|       | 0.625 | 0.183 | 0.155 | 0.138 | 0.158667 | 0.013119 | 21.61671208 | 78.38328792 |                       |
|       | 0.312 | 0.214 | 0.183 | 0.199 | 0.198667 | 0.00895  | 27.06630336 | 72.93369664 |                       |
|       | 0.156 | 0.331 | 0.308 | 0.356 | 0.331667 | 0.01386  | 45.18619437 | 54.81380563 |                       |
|       | 0.078 | 0.593 | 0.563 | 0.585 | 0.580333 | 0.008969 | 79.06448683 | 20.93551317 |                       |

Effect of sample WM4 on MCF7 cells at different concentration

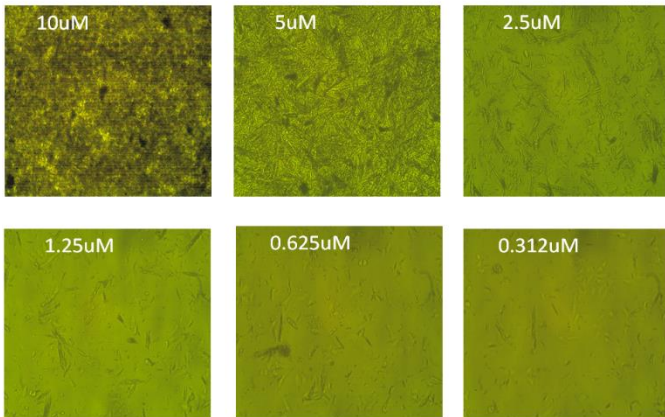

Effect of sample WM4 on HepG2 cells at different concentration

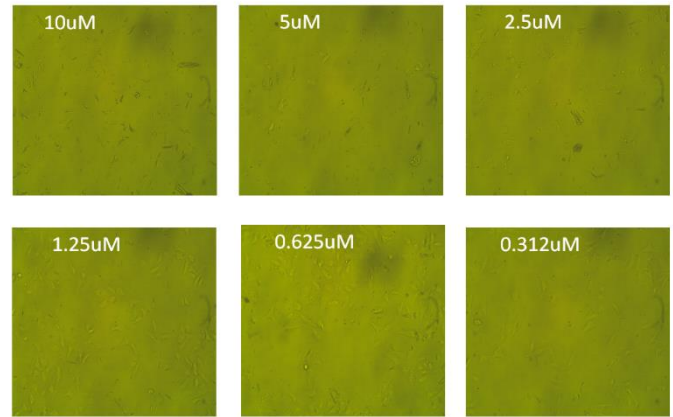

Effect of sample WM4 on MCF7 cells at different concentration

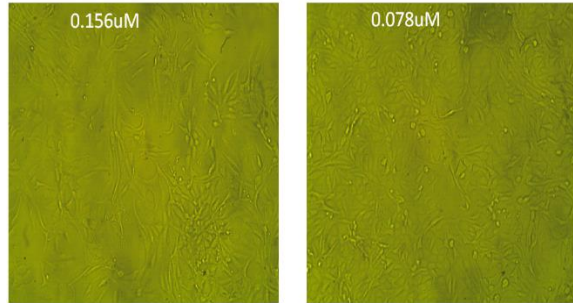

Effect of sample WM4 on HepG2 cells at different concentration

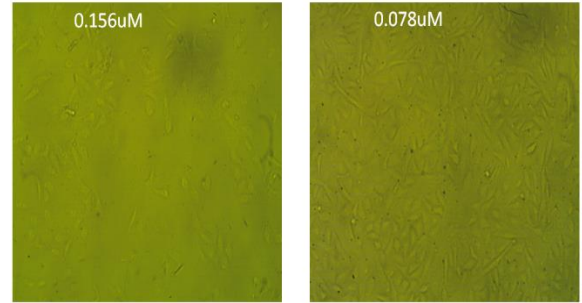

effect of sample WM4 on MCF7 cells at different concentration

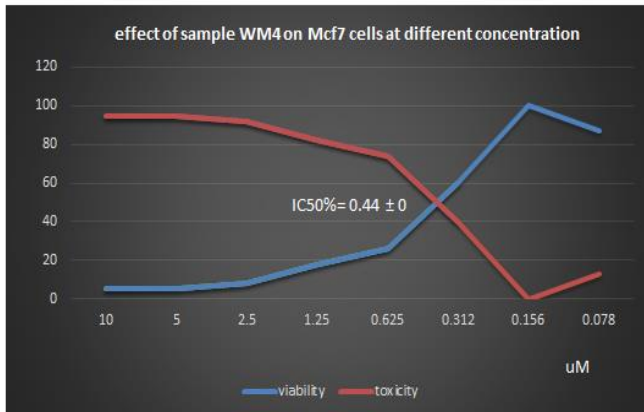

effect of sample WM4 on HepG2 cells at different concentration

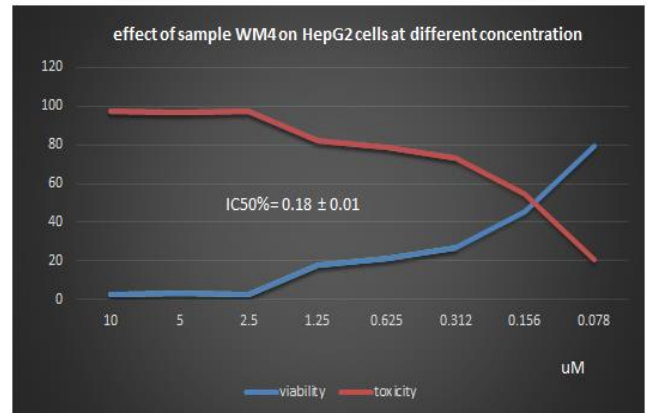

### S.2.2. Safety assay

The safety profile of compound **14** was checked on against normal human lung cells (WI-38) to determine the treatments concentrations that do not depict toxic effects against the tested cells. A portion of 100.0  $\mu$ l of  $6 \times 10^4$  cell/ml cells was seeded into each well of a 96-well plate and then the plates were incubated at 37°C in a humidified 5.0% CO<sub>2</sub> incubator for 24 h. At the end of incubation period, the exhausted medium was replaced with 100.0  $\mu$ l of different concentrations of the designated treatment (prepared in RPMI medium starting from 1.0 mM). The inoculated plates were incubated at the same growth conditions for another 24 h. At the end of incubation, cellular viability was assessed using MTS assay kit (Promega) according to the manual instruction.

#### \*\*\* Cytotoxicity of WA-1 (compound 14) against normal human lung cells (WI-38)

| ID   | uM    | O.D   |       |       | Mean O.D | ±SE      | Viability % | Toxicity %  | IC50 ± SD |
|------|-------|-------|-------|-------|----------|----------|-------------|-------------|-----------|
| Wi38 | ----- | 0.672 | 0.67  | 0.668 | 0.67     | 0.001155 | 100         | 0           | uM        |
| WA1  | 10    | 0.022 | 0.035 | 0.03  | 0.029    | 0.003786 | 4.328358209 | 95.67164179 | 0.14 ± 0  |
|      | 5     | 0.026 | 0.025 | 0.029 | 0.026667 | 0.001202 | 3.980099502 | 96.0199005  |           |
|      | 2.5   | 0.021 | 0.02  | 0.023 | 0.021333 | 0.000882 | 3.184079602 | 96.8159204  |           |
|      | 1.25  | 0.02  | 0.02  | 0.025 | 0.021667 | 0.001667 | 3.233830846 | 96.76616915 |           |
|      | 0.625 | 0.021 | 0.026 | 0.023 | 0.023333 | 0.001453 | 3.482587065 | 96.51741294 |           |
|      | 0.312 | 0.026 | 0.023 | 0.025 | 0.024667 | 0.000882 | 3.68159204  | 96.31840796 |           |
|      | 0.156 | 0.152 | 0.177 | 0.132 | 0.153667 | 0.013017 | 22.93532338 | 77.06467662 |           |
|      | 0.078 | 0.534 | 0.551 | 0.528 | 0.537667 | 0.006888 | 80.24875622 | 19.75124378 |           |

**Effect of sample WA1 on wi38 cells at different concentration**

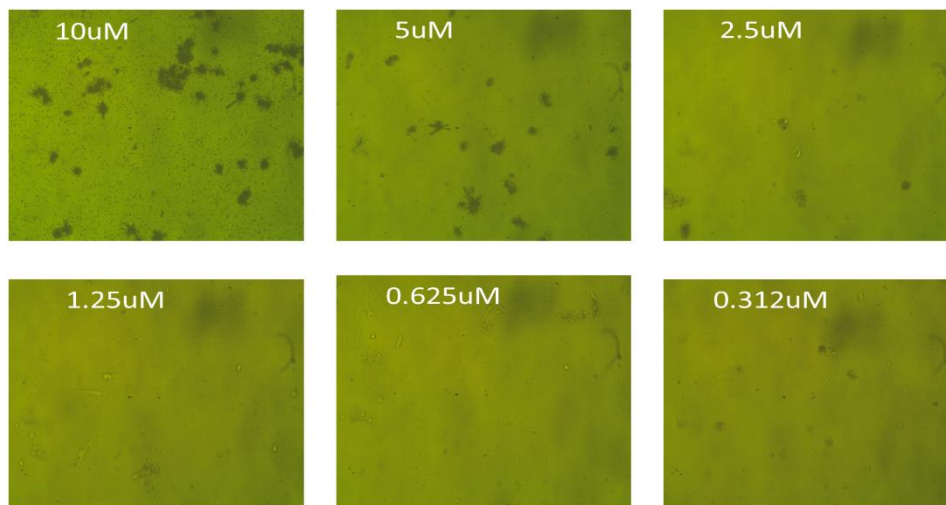



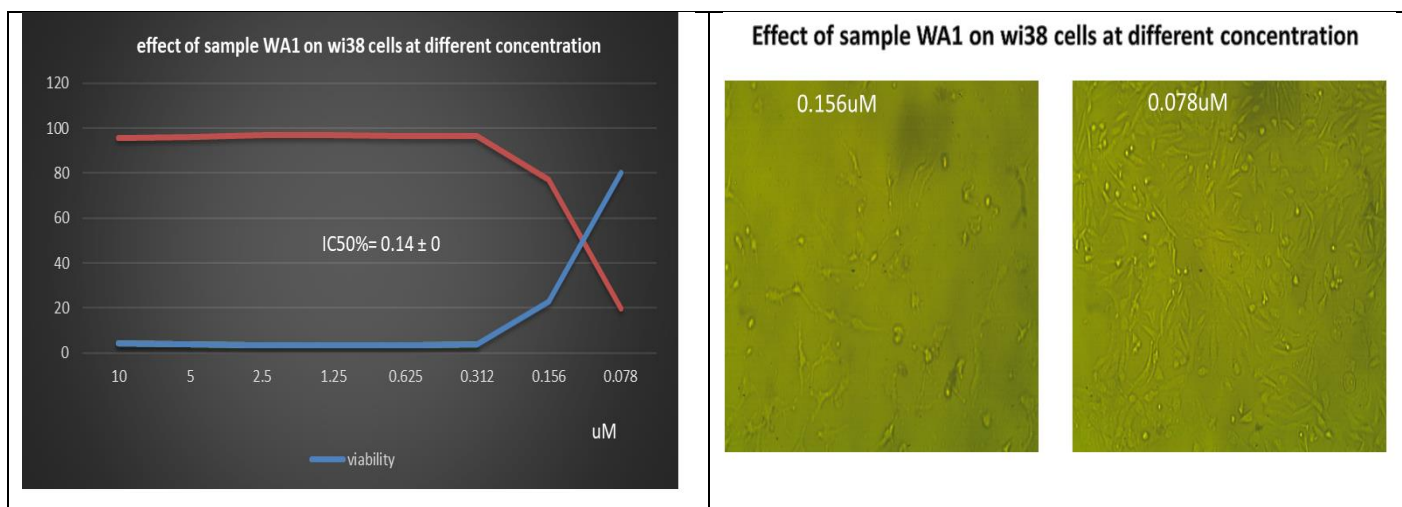

### S.2.3. *In vitro* VEGFR-2 inhibition

Inhibitory activity of compound **14** against VEGFR-2 was evaluated using Human VEGFR-2 ELISA kit (VEGFR2(KDR) Kinase Assay Kit Catalog # 40325)(BPS Bioscience, San Diego, USA). A specific antibody for VEGFR-2 was seeded on a 96-well plate and 100  $\mu$ L of the standard solution or the tested compound was added, all were incubated at room temperature for 2.5 hours. Then washed, 100  $\mu$ L of the prepared biotin antibody was added, then incubated at room temperature for additional 1 hour. Washed, 100  $\mu$ L of streptavidin solution was added then incubated for 45 min. at room temperature. Washed again, 100  $\mu$ L of TMB Substrate reagent was added and incubated for 30 min. at room temperature. 50  $\mu$ L of the stop solution was added, then read at 450 nm immediately. The standard curve was drawn, concentrations on the X-axis and the absorbance on the Y-axis.

| VEGFR2 |      |      |     |      |    |    |            |       |      |              |       |            |
|--------|------|------|-----|------|----|----|------------|-------|------|--------------|-------|------------|
| code   | IC50 | conc | log | %inh | T2 | T1 | $\Delta$ T | RFU2  | RFU1 | $\Delta$ RFU | slope | K.Activity |
| WA1    |      | 100  | 2   | 95.3 | 30 | 0  | 30         | 4.67  | 0    | 4.67         | 3.333 | 5.604      |
|        |      | 10   | 1   | 88.2 | 30 | 0  | 30         | 11.84 | 0    | 11.84        | 3.333 | 14.208     |
|        |      | 1    | 0   | 71.8 | 30 | 0  | 30         | 28.22 | 0    | 28.22        | 3.333 | 33.864     |
|        |      | 0.1  | -1  | 46.5 | 30 | 0  | 30         | 53.48 | 0    | 53.48        | 3.333 | 64.176     |
|        |      | 0.01 | -2  | 31.6 | 30 | 0  | 30         | 68.41 | 0    | 68.41        | 3.333 | 82.092     |
| EC     |      |      |     | 0    | 30 | 0  | 30         | 100   | 0    | 100          | 3.333 | 120        |

| code | IC50 | conc | log | %inh | T2 | T1 | $\Delta$ T | RFU2 | RFU1 | $\Delta$ RFU | slope | K.Activity |
|------|------|------|-----|------|----|----|------------|------|------|--------------|-------|------------|
|------|------|------|-----|------|----|----|------------|------|------|--------------|-------|------------|

| Sorafenib | 100  | 2  | 95.7 | 30 | 0 | 30 | 4.29  | 0 | 4.29  | 3.333 | 5.148  |
|-----------|------|----|------|----|---|----|-------|---|-------|-------|--------|
|           | 10   | 1  | 89   | 30 | 0 | 30 | 11.03 | 0 | 11.03 | 3.333 | 13.236 |
|           | 1    | 0  | 75.8 | 30 | 0 | 30 | 24.16 | 0 | 24.16 | 3.333 | 28.992 |
|           | 0.1  | -1 | 57.4 | 30 | 0 | 30 | 42.55 | 0 | 42.55 | 3.333 | 51.06  |
|           | 0.01 | -2 | 36.4 | 30 | 0 | 30 | 63.62 | 0 | 63.62 | 3.333 | 76.344 |
| EC        |      |    | 0    | 30 | 0 | 30 | 100   | 0 | 100   | 3.333 | 120    |

### S.2.4. Cell cycle analysis

The MCF-7 cells were distributed at a density of  $2.5 \times 10^5$  cells per flask on to the tissue culture flasks (T-75 flask; Nunc A/S) containing RPMI-1640 medium supplemented with 2 % FBS. After incubation for 72h with compound **14** at a concentration of 0.041  $\mu$ M, the cells were washed thrice with ice-cold PBS buffer and fixed in 70 % cold ethyl alcohol at  $-20$  °C overnight. The contents from each of the flask were then centrifuged at  $12,000 \times g$  for 20 min followed by washing and treatment with 100  $\mu$ l PBS containing 1 mM RNase A (Qiagen, Hilden, Germany). After incubation for 45 min at 37 °C, the cells were stained with 400  $\mu$ l propidium iodide (PI; 50  $\mu$ g/ml; Sigma-Aldrich) for 30 min. The cells were filtered through a 40- $\mu$ m nylon mesh (BD Biosciences, San Jose, CA, USA), and the DNA content was analyzed using Epics XL-MCL™ Flow Cytometer.

### S.2.5. Apoptosis analysis

The annexin V externalization assay for apoptosis was performed using flow cytometry after treatment MCF-7 cells with compound **14** (at concentrations of 0.041  $\mu$ M) for 72 h as described in the vendor's protocol (BD Pharmingen, BD Biosciences, San Jose, USA). Briefly, untreated and cells treated with compound **15**, from 60 to 70% confluent plates were trypsinized, washed in PBS and resuspended ( $1 \times 10^6$  cells/ml) in binding buffer (10 mM HEPES, pH 7.4, 140 mM NaCl, 2.5 mM  $\text{CaCl}_2$ ). A fraction (100  $\mu$ l/ $1 \times 10^5$  cells) of the cell suspension was incubated with 5  $\mu$ l annexin V conjugated to FITC and 5  $\mu$ l propidium iodide (PI) for 15 min at 25 °C in the dark. 400  $\mu$ l of binding buffer was added to the suspension and apoptosis was measured immediately using a Becton Dickinson FACScan analyzer as described by Raza *et al.*, 2008. The apoptotic cells were estimated as the percentage of cells that stained positive for Annexin V-FITC while remaining impermeable to PI (AV+/PI-). This method also distinguished viable cells (AV-/PI-) and cells undergoing necrosis (AV+/PI+).

### S.2.6. *In vitro* assay for BAX and Bcl-2 using RT-PCR Technique

The molecular anticancer mode of action of compound **14** was investigated by screening their ability to affect the level of BAX and Bcl-2 using specific forward and reverse primers and RTq-PCR technique in MCF-7 cells (chosen as the most sensitive cancer cell line). After cellular treatment, MCF-7 cell line was cultured into 12 well plates ( $6 \times 10^3$  cell/ml) for 24 hour at a concentration of 0.04  $\mu$ M. After treatment, total RNA extraction was performed using RNA extraction kit (Qiagen, Germany). Then, 1  $\mu$ g of the obtained RNA was used to synthesize cDNA using cDNA synthesis kit (Promega Corporation, Madison, USA) as recommended by the manufacturer. Simultaneously, GAPDH was used as internal control. The RTq-PCR was done using SYBR Green dye (QuantiTect SYBR Green PCR Kits) and Light Cycler fluorimeter (Bio-RAD S1000 Tm thermal cycler). The PCR cycling program was as follows: 95°C for 2 min, followed by 40 cycles of 95°C for 30s, 55°C for 30 s, and 60°C for 45s, and finally 60°C for 5 min.

**The sequences for primers used in quantitative Real Time Reverse-Transcriptase PCR (qRT-PCR)**

| <u>Primers</u> |                                      |
|----------------|--------------------------------------|
| BAX            | : F 5'- TCAGGATGCGTCCACCAAGAAG -3',  |
| BAX            | : R 5'- TGTGTCCACGGCGGCAATCATC-3'.   |
| Bcl-2          | : F 5'- ATCGCCCTGTGGATGACTGAGT -3',  |
| Bcl-2          | : R 5'- GCCAGGAGAAATCAAACAGAGGC -3'. |
| GAPDH          | : F 5'- GTCTCCTCTGACTTCAACAGCG-3'    |
| GAPDH          | : R 5'- ACCACCCTGTTGCTGTAGCCAA-3'    |

| Sample | Gene Expression |            |     |
|--------|-----------------|------------|-----|
|        | Control cells   | Test cells | FLD |
|        |                 |            |     |

#### MCF7

| Ser | code    | Conc | GAPDH | Bax   | ΔCTC  | GAPDH | Bax   | ΔCTE  | ΔΔ CT     | 2 <sup>ΔΔCT</sup> |
|-----|---------|------|-------|-------|-------|-------|-------|-------|-----------|-------------------|
|     |         |      | HC    | TC    | TC-HC | HE    | TE    | TE-HE | ΔCTE-ΔCTC | E=1.872           |
| 1   | WA1     |      | 21.66 | 33.92 | 12.26 | 21.86 | 31.07 | 9.21  | -3.05     | 6.7691            |
| 5   | Control |      | 21.66 | 33.92 | 12.26 | 21.66 | 33.92 | 12.26 | 0         | 1                 |

| Ser | code    | Conc | GAPDH | Bcl2  | ΔCTC  | GAPDH | Bcl2  | ΔCTE  | ΔΔ CT     | 2 <sup>ΔΔCT</sup> |
|-----|---------|------|-------|-------|-------|-------|-------|-------|-----------|-------------------|
|     |         |      | HC    | TC    | TC-HC | HE    | TE    | TE-HE | ΔCTE-ΔCTC | E=1.872           |
| 1   | WA1     |      | 21.66 | 26.84 | 5.18  | 21.86 | 29.97 | 8.11  | 2.93      | 0.1593            |
| 5   | Control |      | 21.66 | 26.84 | 5.18  | 21.66 | 26.84 | 5.18  | 0         | 1                 |

#### S.2.7. Wound healing assay (Migration assay)

**Rat of migration (RM) = (wi – wf) / t**

Wi = average of initial wound width um

Wf = average of final wound width um

T = time span of the assay in hours

**Percentage of wound clouser % = { (At=0 – At=Δt) / At=0 } 100**

At=0 = initial wound area

At=Δt = wound area after n hours

**Area difference % = (Ai – Af)**

Ai = initial area

Af = final area

MCF-7 cells were grown to 95.0% confluency in a complete DMEM medium and then the wounds were formed using a plastic tip. After washing with pre-warmed PBS, the cells were incubated in the specific medium or compound **14** treatment. After incubation at 37°C and 5.0% CO<sub>2</sub> for 24h, the cells were washed with PBS and the wounds distance was determined as the scratch width of the treated and untreated groups using ImageJ software.



### S3. *In silico* studies

#### S.3.1. Docking studies

**Protein Preparation:** The crystal structure of VEGFR-2 [PDB ID: 2OH4, resolution: 2.05 Å] was obtained from Protein Data Bank (<https://www.rcsb.org>). At first, the crystal structure of the VEGFR-2 complexed with the co-crystallized ligand was prepared by removing crystallographic water molecules. Only one chain was retained besides the co-crystallized ligand. The selected protein chain was protonated using the following setting. The used electrostatic functional form was GB/VI with a distance cut-off of 15 Å. The used value of the dielectric constant was 2 with an 80 dielectric constant of the used solvent. The used Van der Waals functional form was 800R3 with a distance cut-off of 10 Å. Then, the energy of the protein chain was minimized using Hamiltonian AM1 implanted in Molecular Operating Environment (MOE 2019 and MMFF94x (Merck molecular force field) for structural optimization. Next, the active site of the target protein was defined for ligand docking and redocking (in case of validation of docking protocol). The active site of the protein was identified as the residues that fall within the 5 Å distance from the perimeter of the co-crystallized ligand.

**Ligand Preparation:** 2D structures of the synthesized compounds and the standard compound, sorafenib were drawn using ChemBioDraw Ultra 14.0 and saved in MDL-SD file format. The 3D structures of the ligands were protonated, and the structures were optimized by energy minimization using MM2 force-field and 10000 iteration steps of 2 fs. The conformationally optimized ligands were used for docking studies.

**Docking Setup and Validation of Docking Protocol:** The protein-ligand docking studies were carried out using MOE version 2019. Validation of the docking protocol was carried out by redocking the co-crystallized reference ligand against the isolated pocket of VEGFR-2. The docking protocol was validated by comparing the heavy atoms RMSD value of the re-docked ligand pose with the corresponding co-crystallized reference ligand structure.

The docking setup for the tested compounds was established according to the protocol followed in the validation step. For each docking run, 30 docked solutions were generated using ASE for scoring function and rigid receptor for refinement. The pose with ideal binding mode was selected for further investigations. The docking results were visualized using Discovery Studio (DS) 4.0.

Analysis of the docking results was carried out by comparing the interactions and docking score obtained for the docked ligands with that of the re-docked reference molecule.

### **S.3.2. MD simulations**

To assess the robustness of the VEGFR-2\_14 complex and to compare the structure of the apo and holo protein, a 100 ns classical unbiased MD simulation was run in GROMACS 2021. We utilized the solution builder module of the CHARMM-GUI server to generate the input files. Using the transferable intermolecular potential 3 points (TIP3P) water model, we solvated and centered the apo protein and the docked complex in a cube of 8.3 nm in length with 1 nm of padding, and then neutralized the system with NaCl ions at a concentration of 0.154 M. The VEGFR-2 protein's amino acid parameters, the TIP3P water model, and the neutralizing ions were all obtained with the help of the CHARMM36m force field. Parameters for compound 14 were calculated with the help of the CHARMM general force field (CGenFF).

We utilized GROMACS 2021 to perform the dynamics and used periodic boundary conditions (PBCs) in all three spatial dimensions. The potential energy of the system was minimized so that atomic collisions may be avoided. During the equilibration process, the temperature was brought to 310 K and the pressure was brought to 1 atm. In detail, the minimizing step was set to be converged at 100,000 minimization steps or when the maximum force on any atom was 100 KJ.mol<sup>-1</sup>.nm<sup>-1</sup>. By using the Velocity Rescale technique, we were able to achieve thermal equilibrium in a canonical (NVT) ensemble. For pressure equilibration, we employed a Berendsen barostat with the isothermal-isobaric (NPT) ensemble. The production run in an NPT ensemble was started for 100 ns with the Nose-Hoover thermostat at 310 degrees Kelvin and the Parrinello-Rahman barostat set at 1 atm. The LINear Constraint Solver (LINCS) was used to impose length constraints on the hydrogen-bonded atoms. We utilized Particle Mesh Ewald (PME) to calculate the electrostatics with a threshold of 1.2 nm. By using a time step of 1 femtosecond during equilibration and 2 femtoseconds during production, the Newtonian equations of motion were integrated using the leap-frog algorithm. One thousand frames were captured at 0.1 ns intervals throughout the simulation. We centered the protein in the middle of the simulation box and made it whole again using the trjconv command and then analyzed it using VMD TK scripts. VEGFR-2 and 14 root mean square deviation (RMSD) values were determined. Root mean square fluctuation (RMSF), the radius of gyration (RoG), the ligand-protein center of mass separation, and the

number of hydrogen bonds were all computed to see their dynamic behavior with time.

### **MM-GBSA**

When calculating the ligand's binding energy, we utilized the Molecular Mechanics-Generalized Born Surface Area (MM-GBSA) method implemented in the `gmx_MMPBSA` program. In addition, decomposition analysis was carried out to calculate the binding energy contributed by each amino acid within 1 nm of the ligand. An ionic strength of 0.154 M and a solvation method (igb) value of 5 were selected. The dielectric constant was set to 1.0 inside and 78.5 outside the structure. The MM-GBSA approach is shown in Equation 1.

$$\Delta G = \langle G_{\text{complex}} - (G_{\text{receptor}} + G_{\text{ligand}}) \rangle \quad \text{Equation 1}$$

Where  $\langle \rangle$  represents the average of the enclosed free energies of complex, receptor, and ligand over the frames used in the calculation. In our approach, we used the whole trajectory (a total of 1000 frames). Different energy terms can be calculated according to Equations 2 to 6 as follows:

$$\Delta G_{\text{binding}} = \Delta H - T\Delta S \quad \text{Equation 2}$$

$$\Delta H = \Delta E_{\text{gas}} + \Delta E_{\text{sol}} \quad \text{Equation 3}$$

$$\Delta E_{\text{gas}} = \Delta E_{\text{ele}} + \Delta E_{\text{vdW}} \quad \text{Equation 4}$$

$$\Delta E_{\text{solv}} = E_{\text{GB}} + E_{\text{SA}} \quad \text{Equation 5}$$

$$E_{\text{SA}} = \gamma \cdot \text{SASA} \quad \text{Equation 6}$$

Where:

$\Delta H$  is the enthalpy which can be calculated from gas-phase energy ( $E_{\text{gas}}$ ) and solvation-free energy ( $E_{\text{sol}}$ ).  $-T\Delta S$  is the entropy contribution to the free binding energy.  $E_{\text{gas}}$  is composed of electrostatic and van der Waals terms;  $E_{\text{ele}}$ ,  $E_{\text{vdW}}$ , respectively.  $E_{\text{sol}}$  can be calculated from the polar solvation energy ( $E_{\text{GB}}$ ) and nonpolar solvation energy ( $E_{\text{SA}}$ ) which is estimated from the solvent-accessible surface area.

### **ProLIF Analysis**

we monitored which amino acids interacted with the ligand and how often using the python package Protein-Ligand Interaction Fingerprints (ProLIF). We next used TTclust to cluster the

trajectories, and the obtained representative frames were used with the Protein-Ligand interaction profiler (PLIP) to extract the interactions as 3D conformations.

### **Principal Component Analysis:**

When the mass-weighted covariance matrix (C) of the positional fluctuations of a subset of atoms in a protein is analyzed using a Principal Component Analysis (PCA), the presence of coordinated motion at large amplitudes in MD trajectories becomes apparent. The alpha carbon atoms of amino acids Glu826:Leu1161 were used in the PCA analysis as a subset of atoms to detect the coordinated motion (15). After equilibration, the protein's configuration in each trajectory was used as the reference structure while performing the analyses that used a single trajectory. In contrast, the last frame from the equilibration of the apo system was chosen as the reference for the concatenated trajectory analyses. The PCA technique, in particular, uses the information revealed by diagonalizing the C matrix to determine the eigenvectors and eigenvalues that define the atomic motions' direction and amplitude. For any given system, the first PC displays the largest motion, whereas subsequent PCs show smaller motions. We were able to analyze the C matrix in GROMACS by utilizing the `gmx covar` command to diagonalize the matrix and the `gmx ana eig` command to complete the analysis.

Essential subspace size was determined based on the cumulative eigenvalues with respect to the number of eigenvectors used, where the variance maintained by the selected eigenvectors was shown. Additionally, the scree plot was made by plotting the eigenvalue of each eigenvector against its index number. Moreover, it is well known that the distribution of the initial eigenvectors does not follow a Gaussian distribution. Therefore, this was used as an additional criterion in determining the number of eigenvectors of the essential subspace.

For each principal component ( $p_i$ ) of the covariance matrix, the cosine content ( $c_i$ ) may be calculated from the C matrix; this absolute value goes from 0 (no cosine) to 1 (perfect cosine). The equation of cosine content is as follows:

$$c_i = \frac{2}{T} \left( \int \cos(i\pi t p_i(t) dt) \right)^2 \left( \int p_i^2(t) dt \right)^{-1}$$

Where T is the time of the simulation. Insufficient sampling has been associated with abnormally high  $c_i$  values, which indicate random motion. The large-scale behavior of proteins is similar to

diffusion when the cosine content of the first few PCs is close to 1. All trajectories' cosine contents were calculated by analyzing the first 10 PCs.

### **Free Energy Landscape (FEL):**

The exploration of a protein's free-energy landscape can be achieved by using a conformational sampling approach, which allows for the investigation of conformations that are similar to the native state structure. In this study, we employed the molecular dynamics (MD) simulation method to fulfill this purpose. To visually represent the free-energy landscape (FEL) in two dimensions, we define the probability of observing the system in a specific state, characterized by certain variables of interest (known as reaction coordinates), as proportionate to the exponential of the negative ratio between the free energy  $G_\alpha$  associated with that state and the product of the Boltzmann constant  $k$  and the absolute temperature  $T$  ( $e^{-G_\alpha/kT}$ ). The complete FEL can be derived from these calculations.

$$G_\alpha = -kT \ln\left(\frac{P(q_\alpha)}{P_{\max}(q)}\right)$$

Where  $k$  is the Boltzmann constant,  $T$  is the temperature of simulation,  $P(q_\alpha)$  is an estimate of the probability density function obtained from a histogram of the MD data and  $P_{\max}(q)$  is the probability of the most probable state. We derived two-dimensional representations of the free-energy landscapes by considering two separate reaction coordinates:  $q_i$  and  $q_j$ . These representations were obtained by analyzing the joint probability distributions, referred to as  $P(q_i, q_j)$ , which describe the system [https://www.sciencedirect.com/science/article/pii/S1093326309000175 ]. The GROMACS `gmx sham` command was utilized for this purpose.

### **S.3.4. Density Function Theory (DFT) calculations**

After optimization at the DFT/B3LYP/6-31+G (d, p) theory level using the Gaussian 09(D.01) program, the quantum chemistry calculations were performed using the Multiwfn, AIMALL, and Gauss View 5.0 interface tools. AIMAll and Multiwfn programs were employed for the examination of the quantum theory of atoms in molecules (QTAIM). Numerous analyses, including those of electrostatic potential (ESP), total density of states (TDOS), frontiers molecular

orbitals (FMO), and total density of states (TDOS), have been done at the same theoretical level.

The following mathematical formulas were used to determine the global reactivity receptors:

$$IP = -E_{\text{HOMO}}$$

$$EA = -E_{\text{LUMO}}$$

$$\mu = (IP + EA)/2$$

$$\eta = (IP - EA)$$

$$\chi = -\mu$$

$$\omega = \mu^2 / (2 \eta)$$

$$\sigma = 1 / \eta$$

$$\Delta N = -(\mu / \eta)$$

$$\Delta E = -\omega$$

$$E_{\text{gap}} = E_{\text{LUMO}} - E_{\text{HOMO}}$$

where ( $\mu$ ) chemical potential, ( $\sigma$ ) is softness, ( $\eta$ ) is global hardness, (EA) is electron affinity (EA), ( $\chi$ ) is electronegativity, (IP) is ionization potential, ( $\Delta E$ ) is energy change, ( $\omega$ ) is electrophilicity index, and  $E_{\text{gap}}$  is the band gap between HOMO and LUMO orbitals.

**Table S1.** The QTAIM parameters (a.u.) at bond critical points (BCPs) of compound **14**.

| BCP # | Atoms     | ( $\rho$ ) | ( $\nabla^2\rho$ ) | K(r)     | G(r)     | V(r)     | H(r)     |
|-------|-----------|------------|--------------------|----------|----------|----------|----------|
| 1     | C1 - C2   | 0.256466   | -0.62583           | 0.215394 | 0.058938 | -0.27433 | -0.21539 |
| 2     | C1 - O3   | 0.403276   | -0.06569           | 0.69715  | 0.680728 | -1.37788 | -0.69715 |
| 3     | C1 - N4   | 0.307285   | -0.96937           | 0.459028 | 0.216686 | -0.67571 | -0.45903 |
| 4     | C7 - C8   | 0.305403   | -0.81588           | 0.29739  | 0.09342  | -0.39081 | -0.29739 |
| 5     | C5 - C6   | 0.307829   | -0.83398           | 0.304248 | 0.095753 | -0.4     | -0.30425 |
| 6     | N4 - C5   | 0.287599   | -0.87836           | 0.401897 | 0.182308 | -0.58421 | -0.4019  |
| 7     | C7 - H30  | 0.289265   | -1.07565           | 0.307155 | 0.038244 | -0.3454  | -0.30716 |
| 8     | C6 - C7   | 0.315141   | -0.86272           | 0.318005 | 0.102325 | -0.42033 | -0.318   |
| 9     | C5 - C10  | 0.310864   | -0.84684           | 0.309388 | 0.097678 | -0.40707 | -0.30939 |
| 10    | C8 - C11  | 0.270685   | -0.67357           | 0.233694 | 0.065302 | -0.299   | -0.23369 |
| 11    | C9 - C10  | 0.312945   | -0.85315           | 0.313479 | 0.100193 | -0.41367 | -0.31348 |
| 12    | C8 - C9   | 0.306615   | -0.81848           | 0.299902 | 0.095281 | -0.39518 | -0.2999  |
| 13    | C10 - H32 | 0.283261   | -1.01006           | 0.29477  | 0.042255 | -0.33702 | -0.29477 |

|    |           |          |          |          |          |          |          |
|----|-----------|----------|----------|----------|----------|----------|----------|
| 14 | C11 - N13 | 0.370332 | -0.80026 | 0.638515 | 0.43845  | -1.07696 | -0.63851 |
| 15 | C11 - C12 | 0.254702 | -0.60264 | 0.211313 | 0.060652 | -0.27197 | -0.21131 |
| 16 | N13 - N14 | 0.343245 | -0.63967 | 0.331974 | 0.172056 | -0.50403 | -0.33197 |
| 17 | C12 - H33 | 0.28361  | -1.0183  | 0.296322 | 0.041747 | -0.33807 | -0.29632 |
| 18 | S15 - C16 | 0.195178 | -0.35743 | 0.148929 | 0.059573 | -0.2085  | -0.14893 |
| 19 | N14 - H33 | 0.016896 | 0.074351 | -0.00335 | 0.015235 | -0.01188 | 0.003353 |
| 20 | N14 - C16 | 0.386386 | -1.19527 | 0.66379  | 0.364971 | -1.02876 | -0.66379 |
| 21 | S15 - C19 | 0.199388 | -0.3705  | 0.154346 | 0.06172  | -0.21607 | -0.15435 |
| 22 | N17 - C20 | 0.27094  | -0.72164 | 0.383482 | 0.203071 | -0.58655 | -0.38348 |
| 23 | N18 - C19 | 0.366414 | -0.65692 | 0.628632 | 0.464402 | -1.09303 | -0.62863 |
| 24 | C16 - N17 | 0.302056 | -0.94084 | 0.431031 | 0.195822 | -0.62685 | -0.43103 |
| 25 | N17 - N18 | 0.36515  | -0.70103 | 0.366969 | 0.191711 | -0.55868 | -0.36697 |
| 26 | C19 - C26 | 0.273059 | -0.69495 | 0.239353 | 0.065616 | -0.30497 | -0.23935 |
| 27 | C20 - C21 | 0.309461 | -0.83984 | 0.307283 | 0.097322 | -0.40461 | -0.30728 |
| 28 | N14 - H36 | 0.011404 | 0.042045 | -0.00188 | 0.008636 | -0.00676 | 0.001876 |
| 29 | C21 - H36 | 0.289575 | -1.07853 | 0.308196 | 0.038563 | -0.34676 | -0.3082  |
| 30 | C22 - C24 | 0.312254 | -0.86796 | 0.312791 | 0.0958   | -0.40859 | -0.31279 |
| 31 | C20 - C23 | 0.313525 | -0.85547 | 0.315032 | 0.101165 | -0.4162  | -0.31503 |
| 32 | C23 - C25 | 0.308978 | -0.83039 | 0.306392 | 0.098794 | -0.40519 | -0.30639 |
| 33 | C21 - C24 | 0.314404 | -0.85689 | 0.317056 | 0.102834 | -0.41989 | -0.31706 |
| 34 | C22 - C25 | 0.310971 | -0.84673 | 0.311019 | 0.099337 | -0.41036 | -0.31102 |
| 35 | C26 - C43 | 0.257541 | -0.62592 | 0.216893 | 0.060413 | -0.27731 | -0.21689 |
| 36 | C43 - H44 | 0.280541 | -0.99062 | 0.289722 | 0.042067 | -0.33179 | -0.28972 |
| 37 | C26 - O27 | 0.401084 | 0.12538  | 0.683283 | 0.714628 | -1.39791 | -0.68328 |
| 38 | N4 - H28  | 0.341929 | -1.82397 | 0.507798 | 0.051807 | -0.5596  | -0.5078  |
| 39 | C6 - H29  | 0.286376 | -1.03455 | 0.300719 | 0.042082 | -0.3428  | -0.30072 |
| 40 | C9 - H31  | 0.286588 | -1.03623 | 0.300838 | 0.041781 | -0.34262 | -0.30084 |
| 41 | C12 - H34 | 0.273922 | -0.92699 | 0.277701 | 0.045955 | -0.32366 | -0.2777  |
| 42 | C12 - H35 | 0.273361 | -0.92275 | 0.276863 | 0.046175 | -0.32304 | -0.27686 |
| 43 | C24 - H37 | 0.284988 | -1.03287 | 0.298673 | 0.040454 | -0.33913 | -0.29867 |
| 44 | C25 - H38 | 0.285253 | -1.02363 | 0.299185 | 0.043279 | -0.34246 | -0.29919 |
| 45 | C23 - H39 | 0.287031 | -1.05078 | 0.302545 | 0.03985  | -0.3424  | -0.30255 |
| 46 | O40 - C41 | 0.249211 | -0.39723 | 0.354413 | 0.255107 | -0.60952 | -0.35441 |
| 47 | C22 - O40 | 0.286527 | -0.35775 | 0.438485 | 0.349048 | -0.78753 | -0.43849 |

|    |           |          |          |          |          |          |          |
|----|-----------|----------|----------|----------|----------|----------|----------|
| 48 | C41 - H50 | 0.288072 | -1.06136 | 0.302664 | 0.037323 | -0.33999 | -0.30266 |
| 49 | C41 - H42 | 0.282696 | -1.00809 | 0.291013 | 0.038991 | -0.33    | -0.29101 |
| 50 | C43 - H45 | 0.275798 | -0.95177 | 0.281808 | 0.043865 | -0.32567 | -0.28181 |
| 51 | C43 - H46 | 0.274106 | -0.93684 | 0.278831 | 0.04462  | -0.32345 | -0.27883 |
| 52 | C2 - H47  | 0.280352 | -0.98973 | 0.28971  | 0.042278 | -0.33199 | -0.28971 |
| 53 | C6 - H49  | 0.008741 | 0.035179 | -0.0021  | 0.006692 | -0.00459 | 0.002103 |
| 54 | C2 - H48  | 0.273833 | -0.93054 | 0.278134 | 0.045498 | -0.32363 | -0.27813 |
| 55 | C2 - H49  | 0.278397 | -0.96613 | 0.285613 | 0.044081 | -0.32969 | -0.28561 |
| 56 | C41 - H51 | 0.282711 | -1.00819 | 0.291041 | 0.038995 | -0.33004 | -0.29104 |

### S.3.5. ADMET studies

ADMET descriptors (absorption, distribution, metabolism, excretion and toxicity) of the compounds were determined using Discovery studio 4.0. Sorafenib was used as a reference molecule. At first, the CHARMM force field was applied then the tested compounds were prepared and minimized according to the preparation of small molecule protocol.

- **Preparation of the tested compounds:**

In this protocol, the general-purpose panel was utilized with the activation of the Prepare ligand option. The change ionization was switched on the true option using the Rule based as an ionization method. In Rule based task, we used the carboxylate as an acid ionization. Additionally, the primary, secondary, and tertiary amines were selected as Base ionization. The ionization enumeration option was switched on the one protomer. Under the filter smart option, we selected all options. The false option was selected for tasks Generate tautomers, generate isomers, Fix bad valencies, and parallel processing. The generate coordinates task was switched on the 3D option. Finally, the duplicate structure task was activated on the remove option.

- **Running of ADMET protocol**

In this protocol, the small molecules panel was utilized with the activation of the ADMET descriptors option. Then, we selected the prepared compounds as the input ligands. Further, all the ADMET parameters (aqueous solubility, Blood brain barrier, intestinal absorption, CYP2D6, and



plasma protein binding) were selected. Then, the output of the running protocol was visualized to give the ADMET chart.

### **S.3.6 Toxicity studies**

The toxicity parameters of the synthesized compounds were calculated using Discovery studio 4.0. Sorafenib was used as a reference molecule. At first, the CHARMM force field was applied then the compounds were prepared and minimized according to the preparation of small molecule protocol.

- **Preparation of the tested compounds:**

In this protocol, the general-purpose panel was utilized with the activation of the Prepare ligand option. The change ionization was switched on the true option using the Rule based as an ionization method. In Rule based task, we used the carboxylate as an acid ionization. Additionally, the primary, secondary, and tertiary amines were selected as Base ionization. The ionization enumeration option was switched on the one protomer. Under the filter smart option, we selected all options. The false option was selected for tasks Generate tautomers, generate isomers, Fix bad valencies, and parallel processing. The generate coordinates task was switched on the 3D option. Finally, the duplicate structure task was activated on the remove option.

- **Running of Toxicity protocol**

In this protocol, the small molecules panel was utilized with the activation of the toxicity prediction (extensible) option. Then, we selected the prepared compounds as the input ligands. Further, the different toxicity models were selected from the model panel. The similarity search task was activated to be true. The detailed report task was switched on as a PDF file. Then, the output of the running protocol was visualized to give the toxicity PDF report.

# 1H NMR of ANS

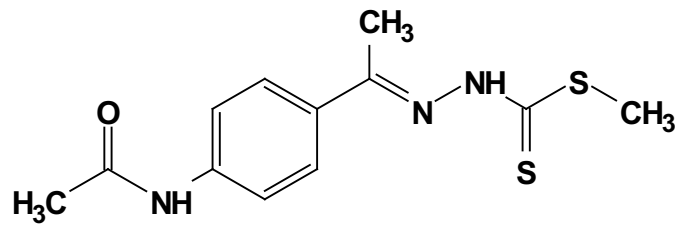

12.35

10.10

7.79  
7.78  
7.77  
7.77  
7.76  
7.63  
7.62  
7.62  
7.61  
7.60

2.47  
2.32  
2.03

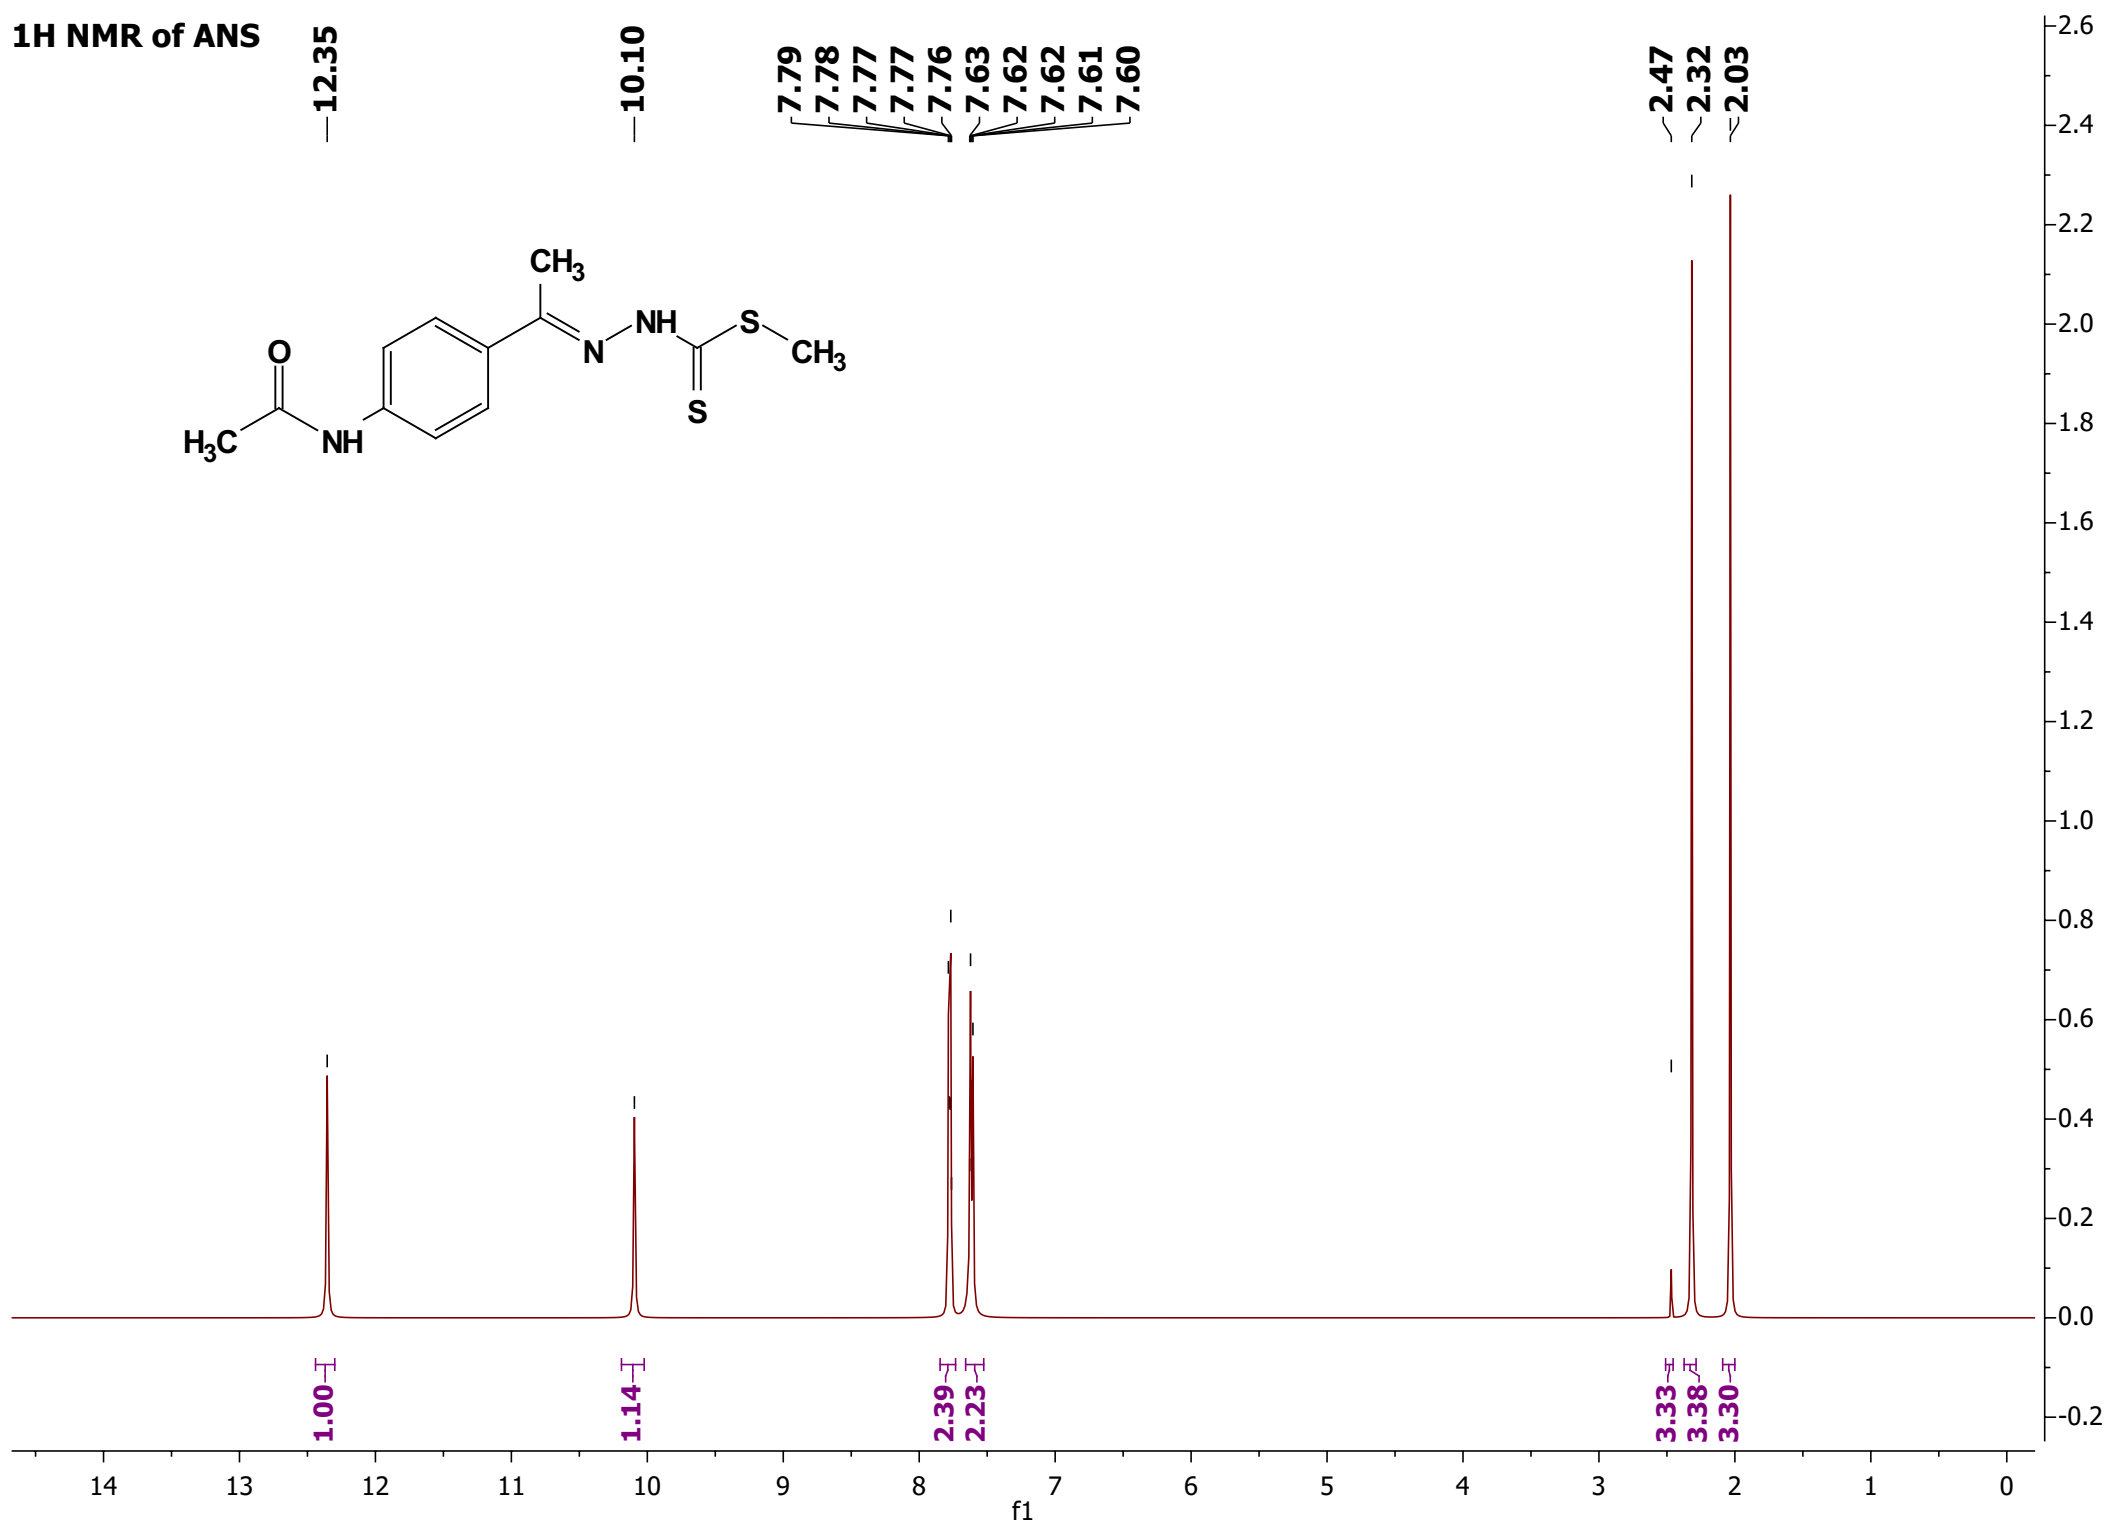

HazemEIQadyANS-DMSO-C13  
HazemEIQadyANS-DMSO-C13

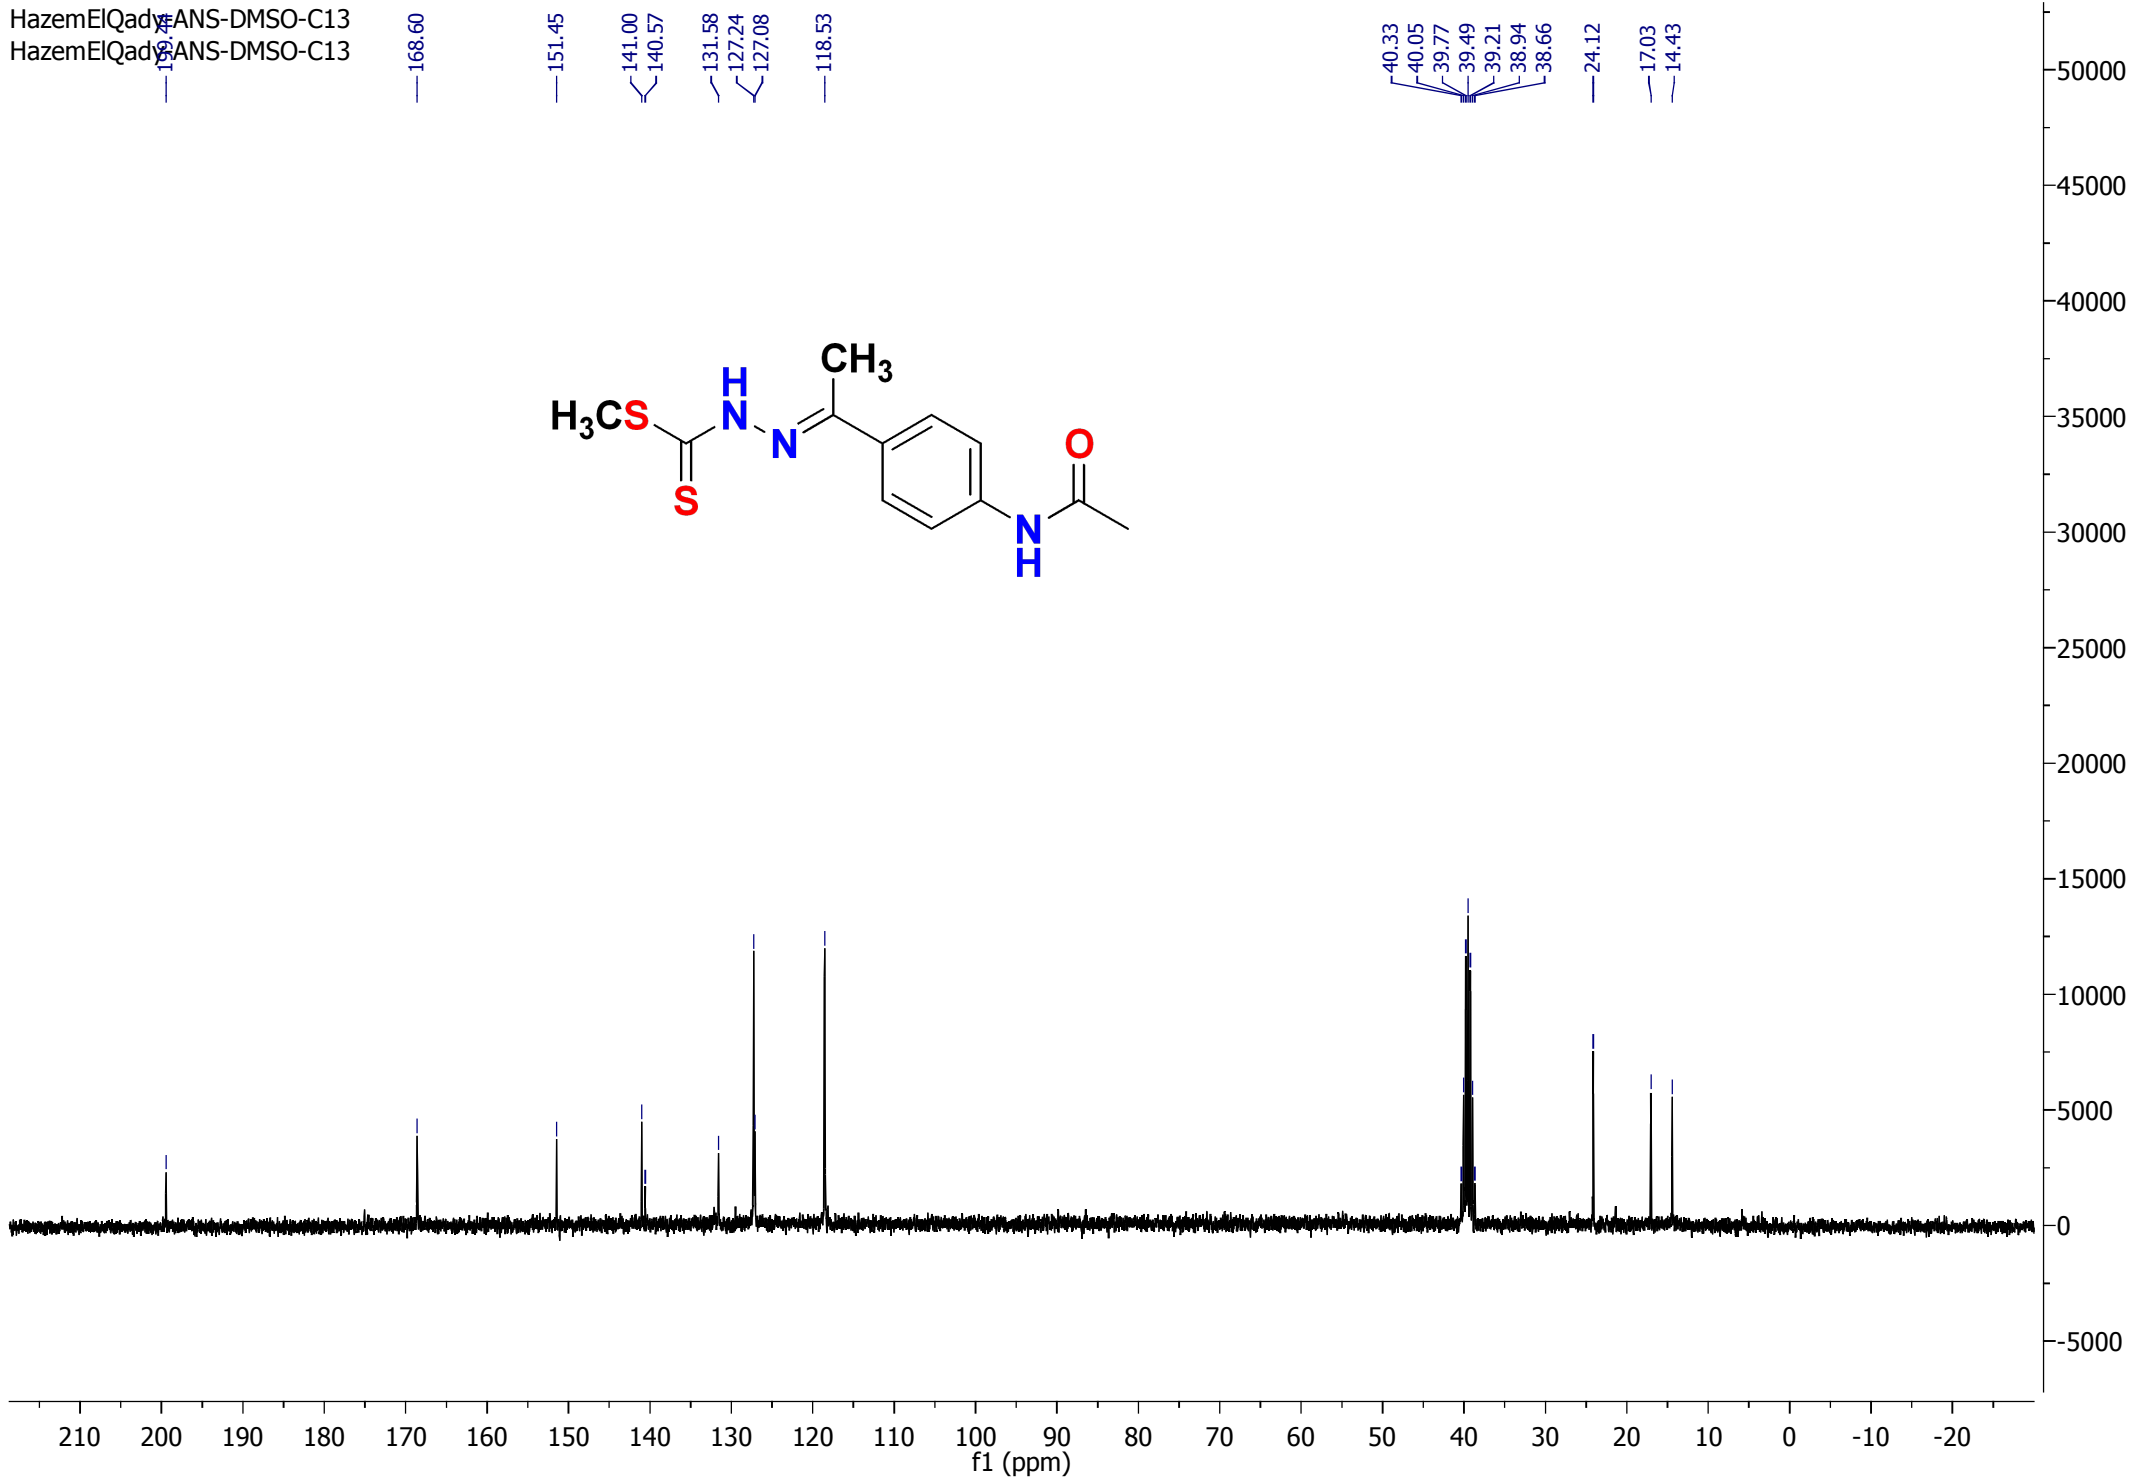

# <sup>1</sup>H NMR of PH

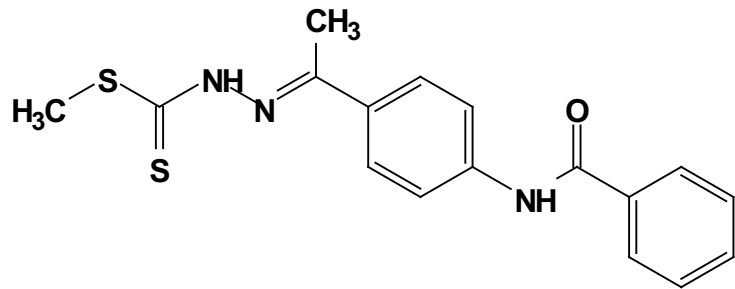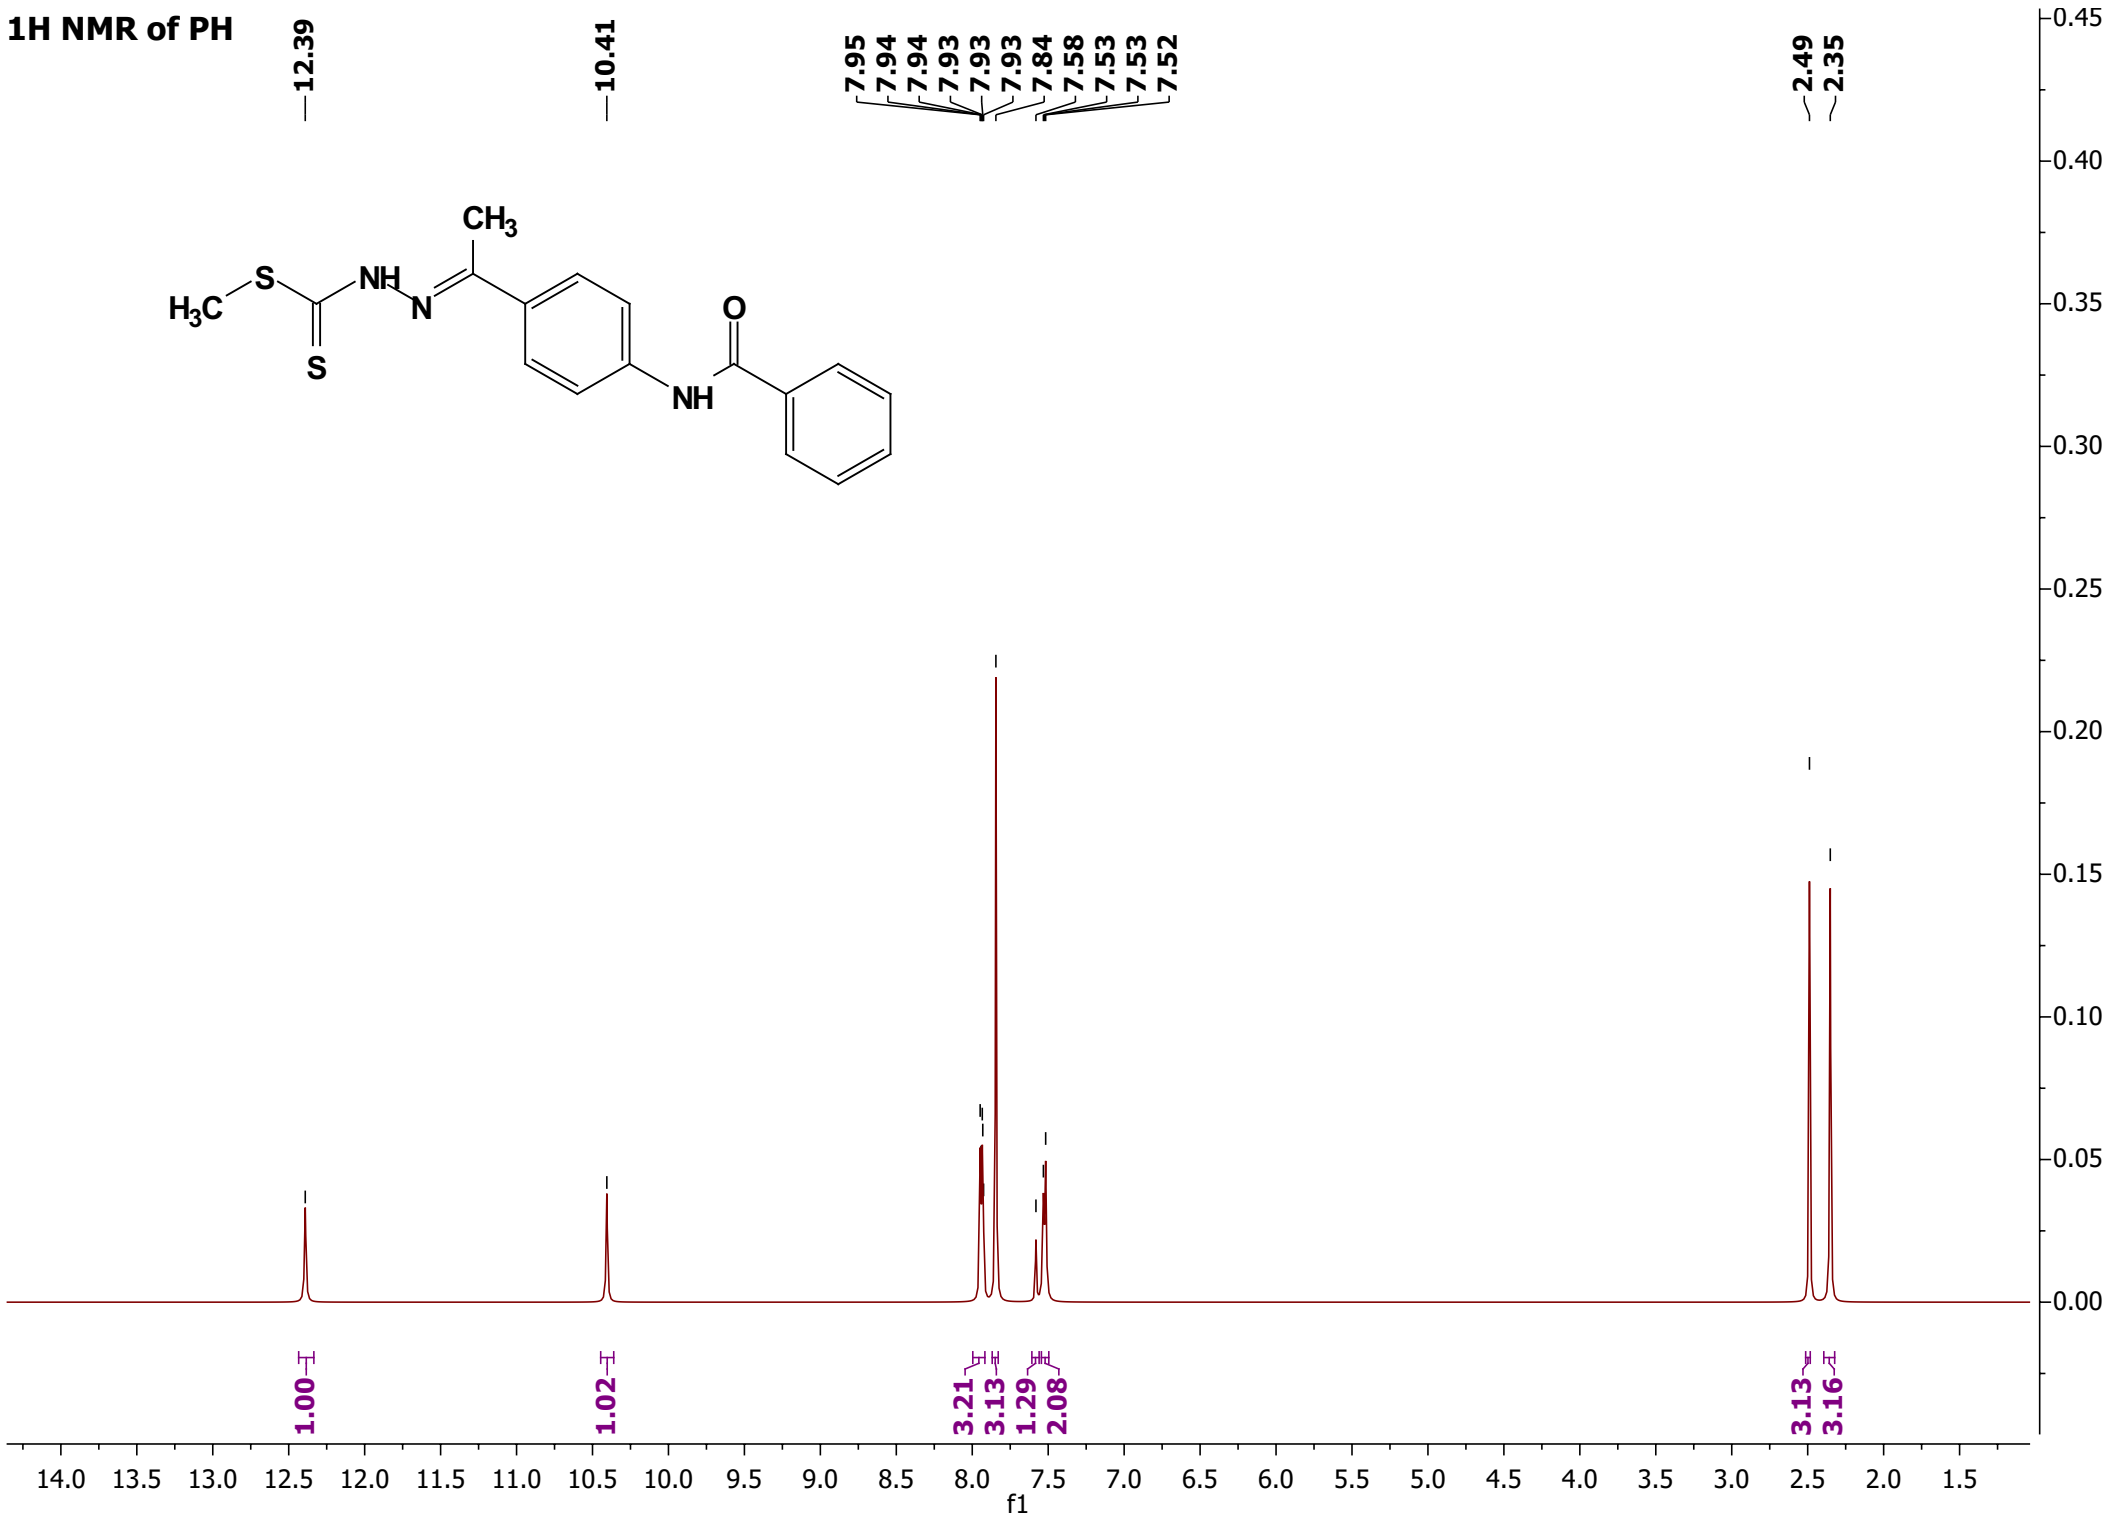

HazemEIQady, PH-DMSO-C13  
HazemEIQady, PH-DMSO-C13

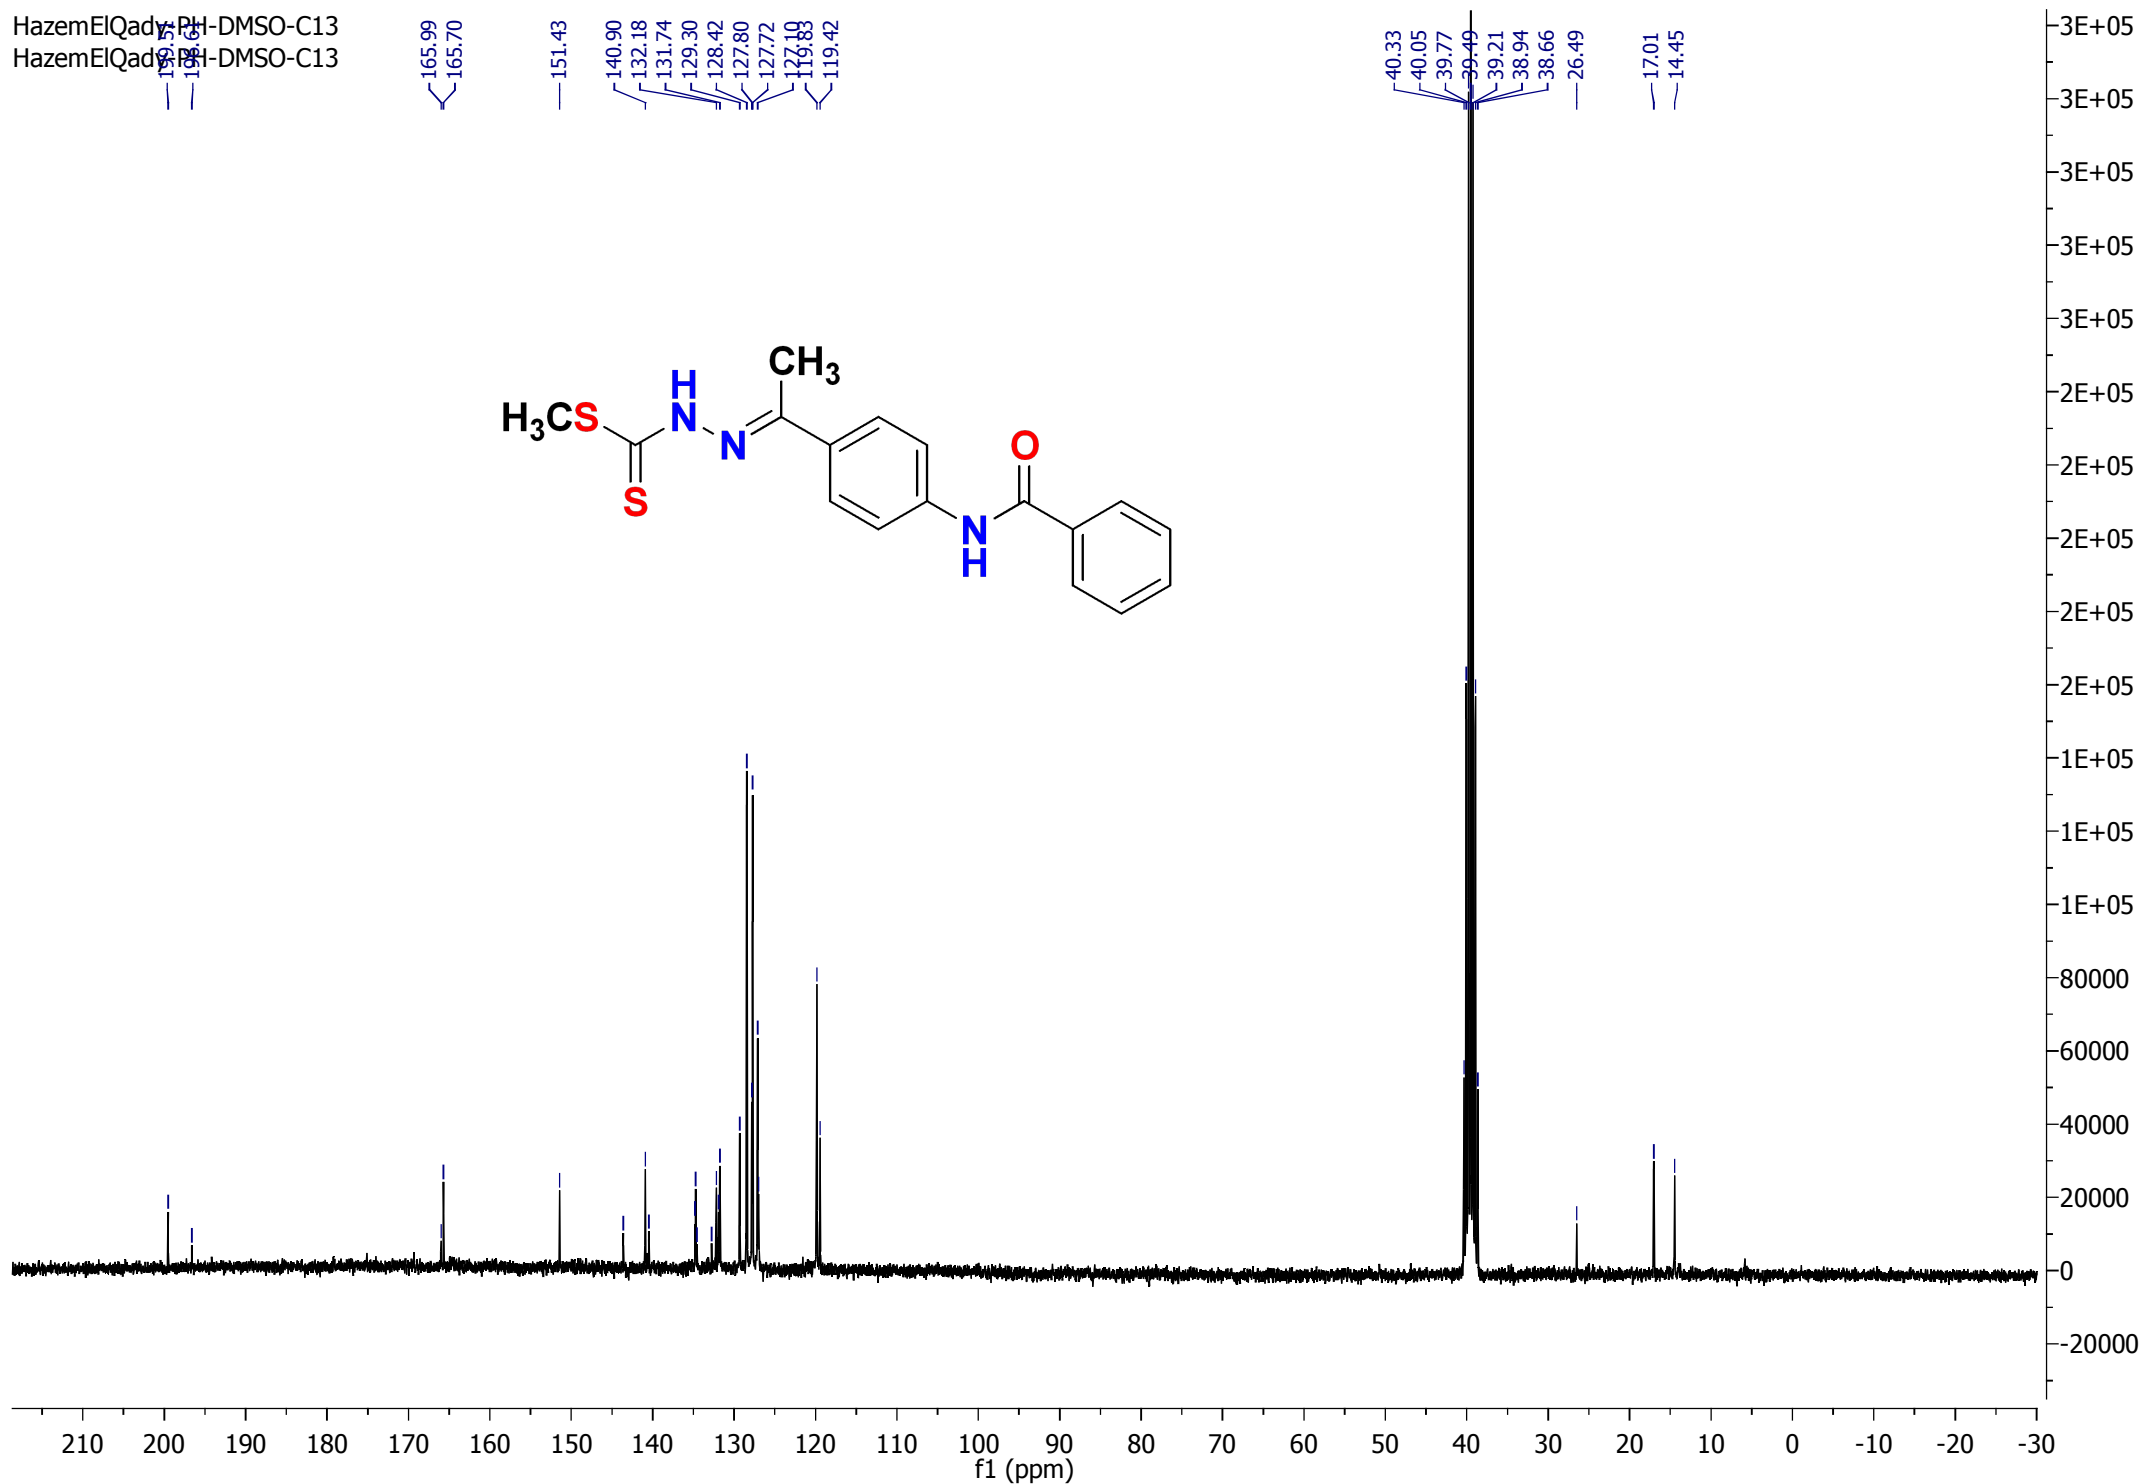

# 1H NMR of CNS

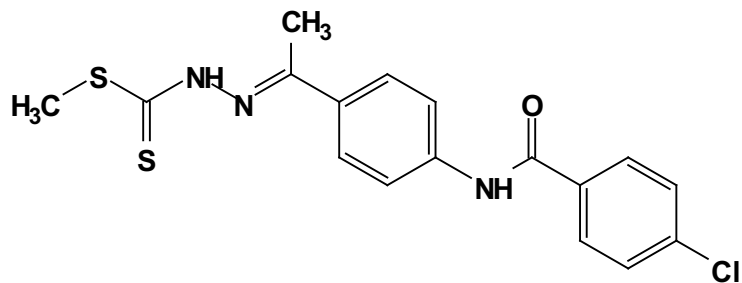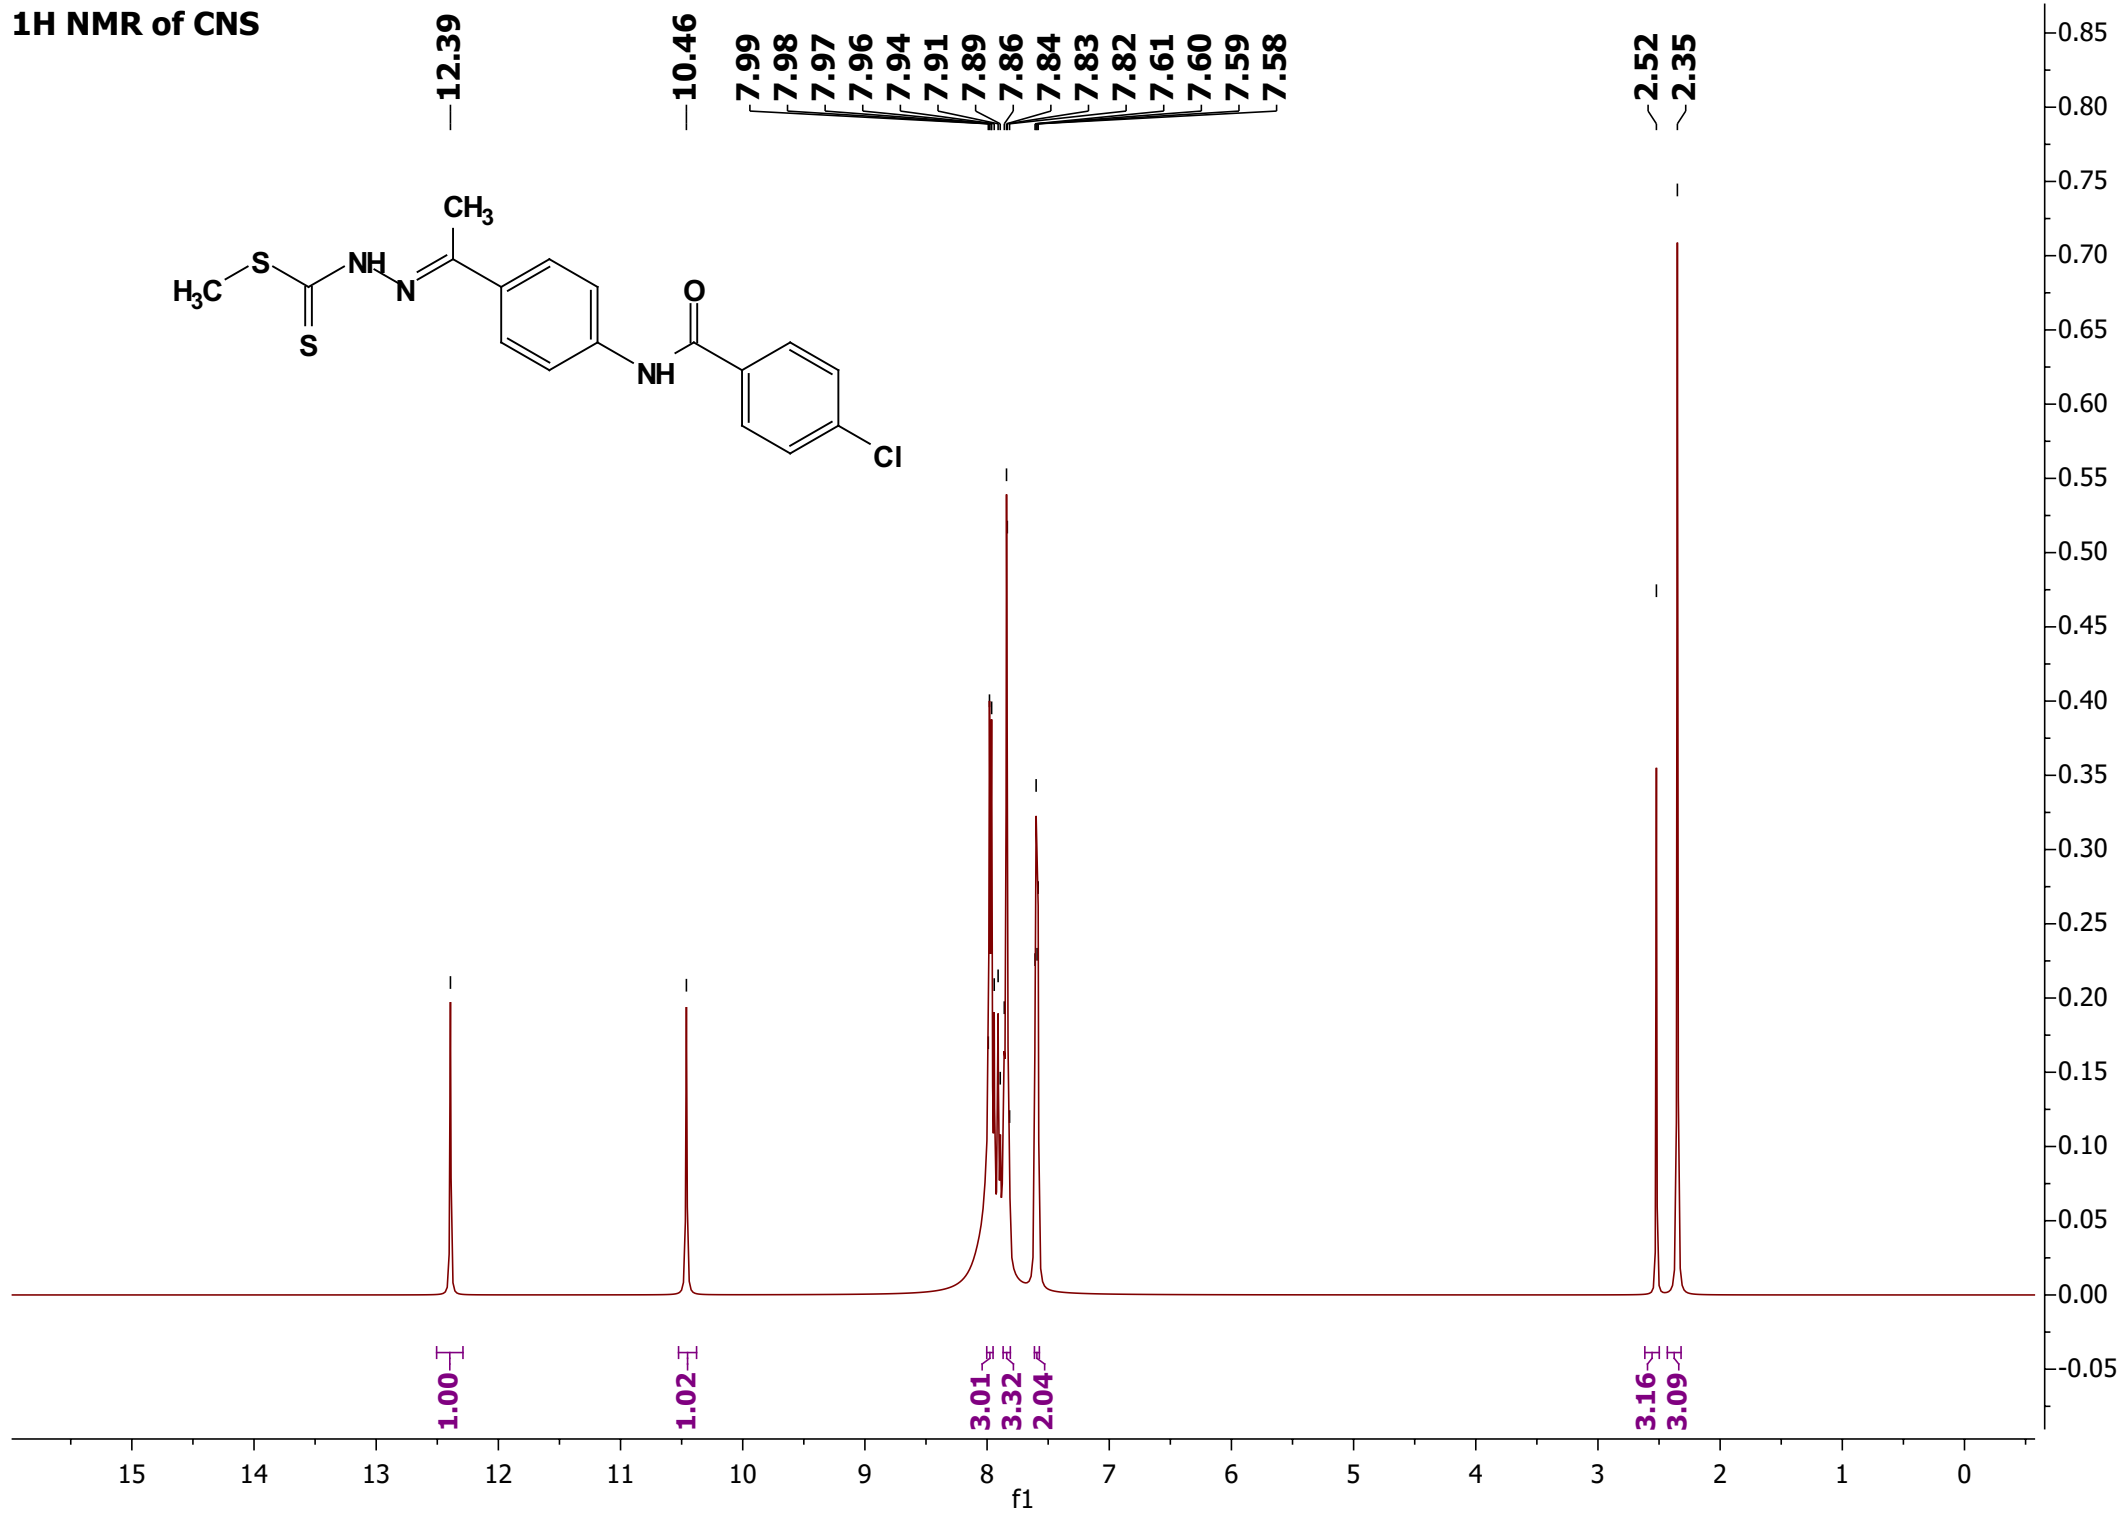

# **<sup>1</sup>H NMR of MNS**

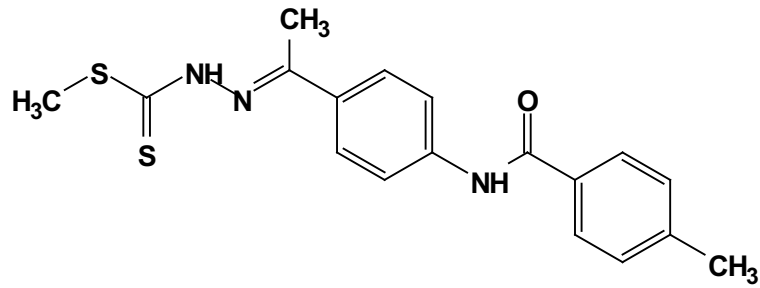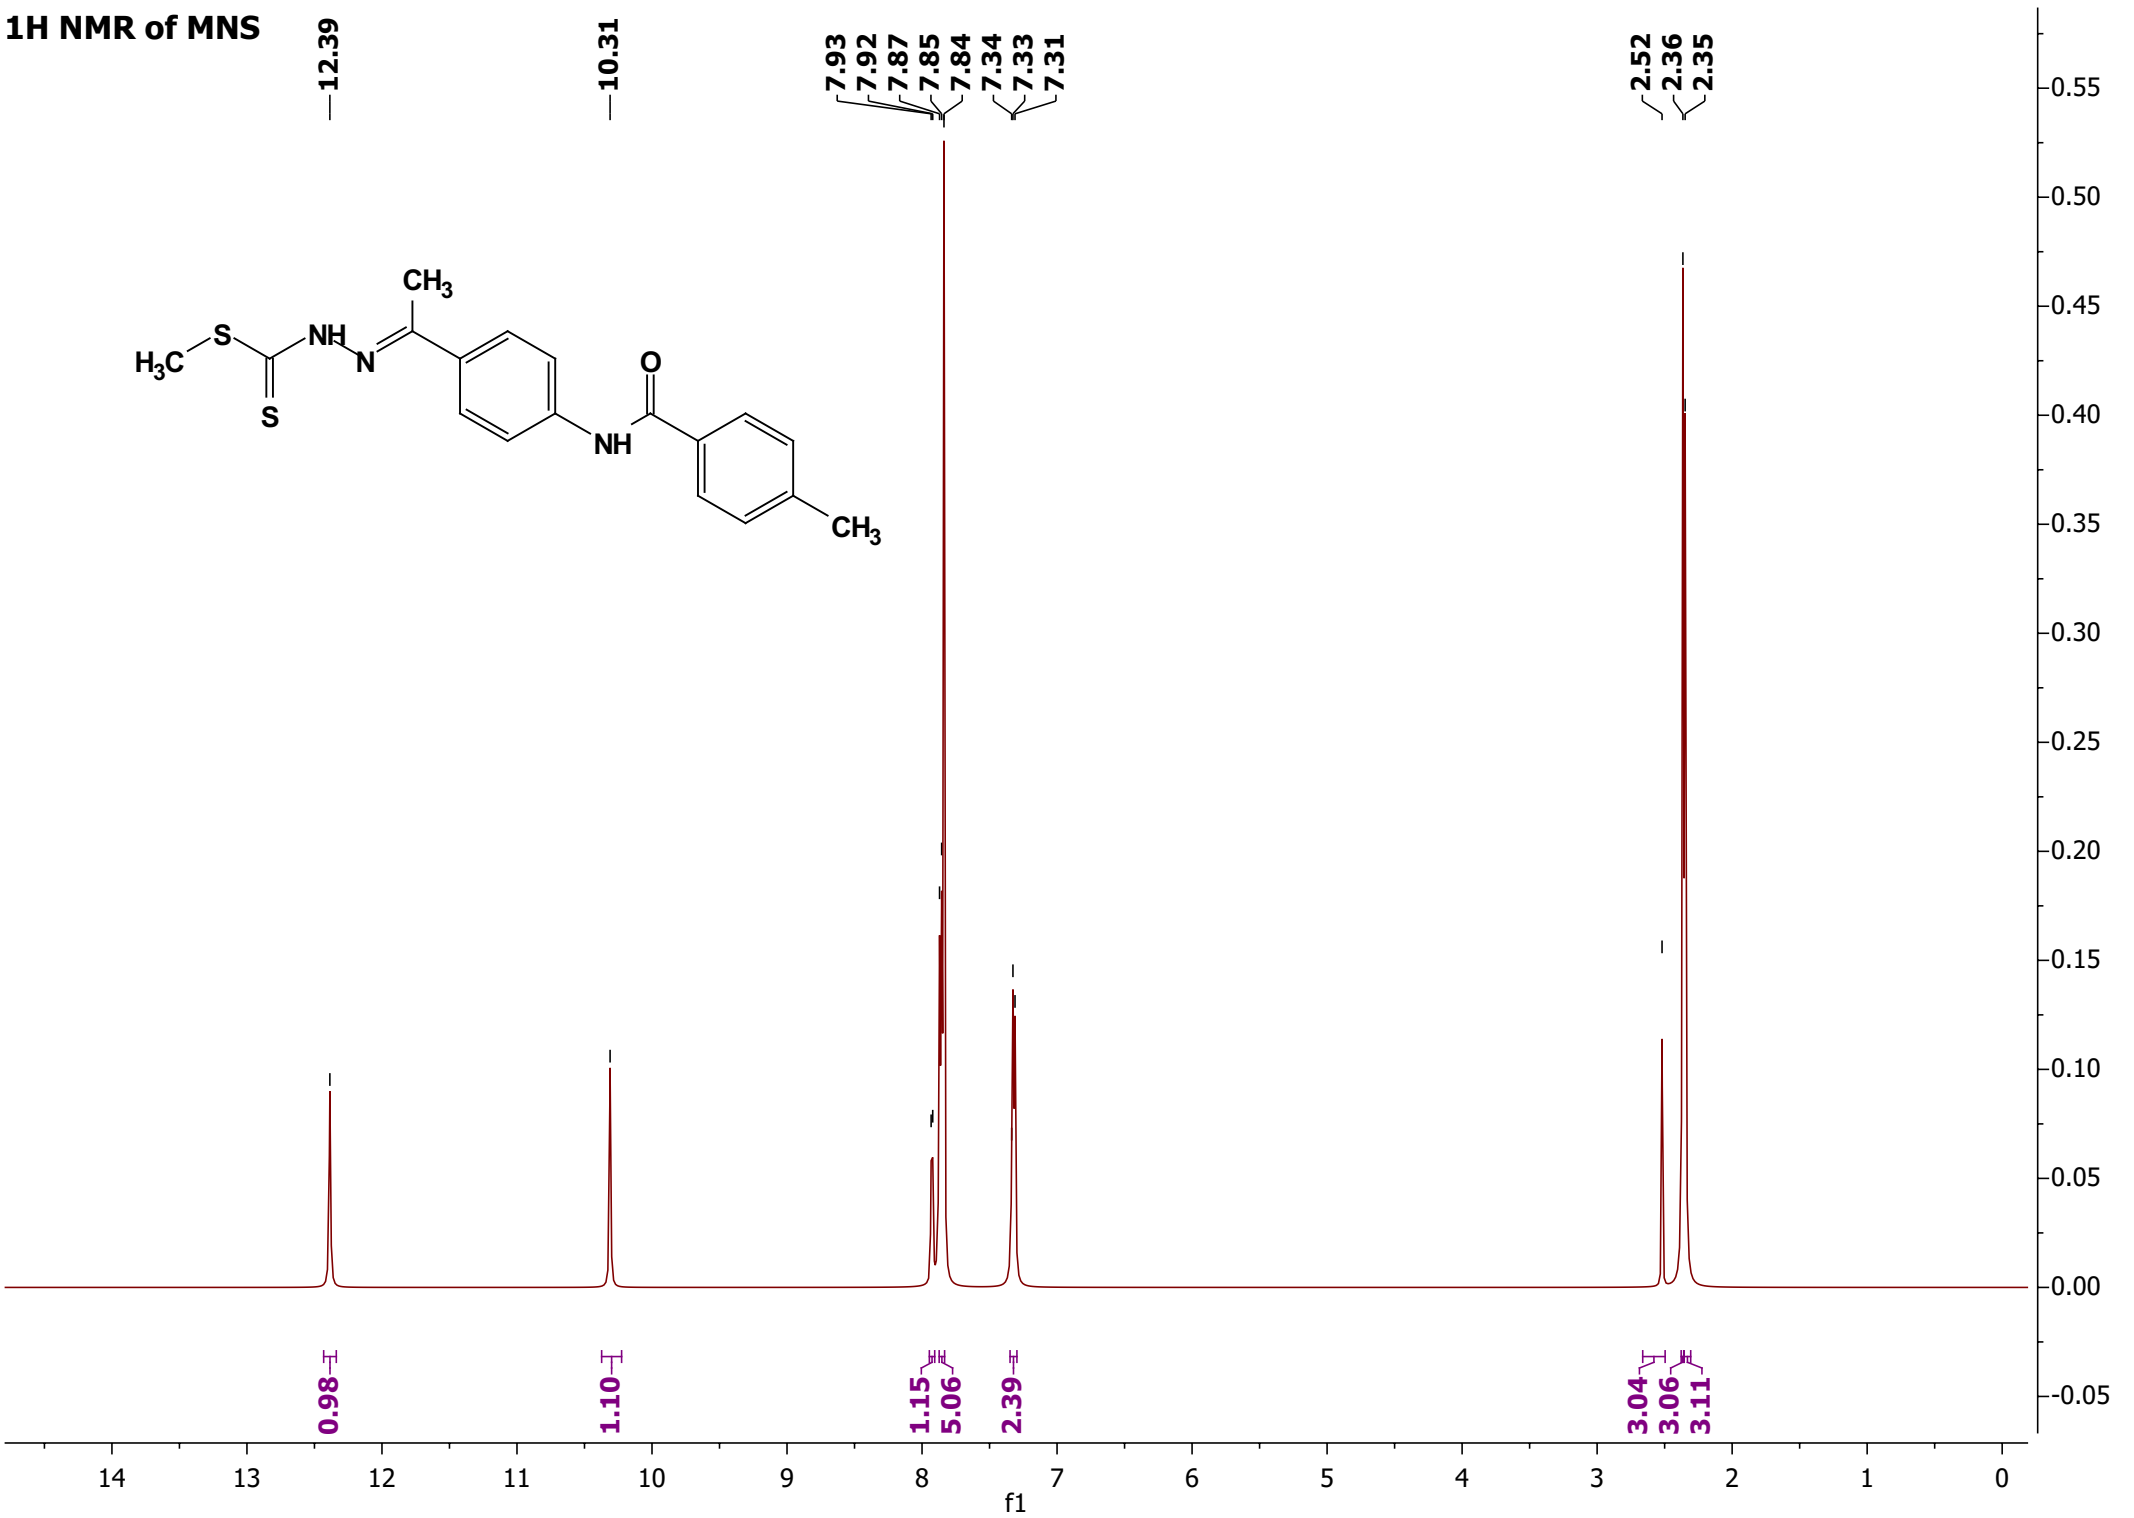

HazemEIQady MNS-DMSO-C13  
HazemEIQady MNS-DMSO-C13

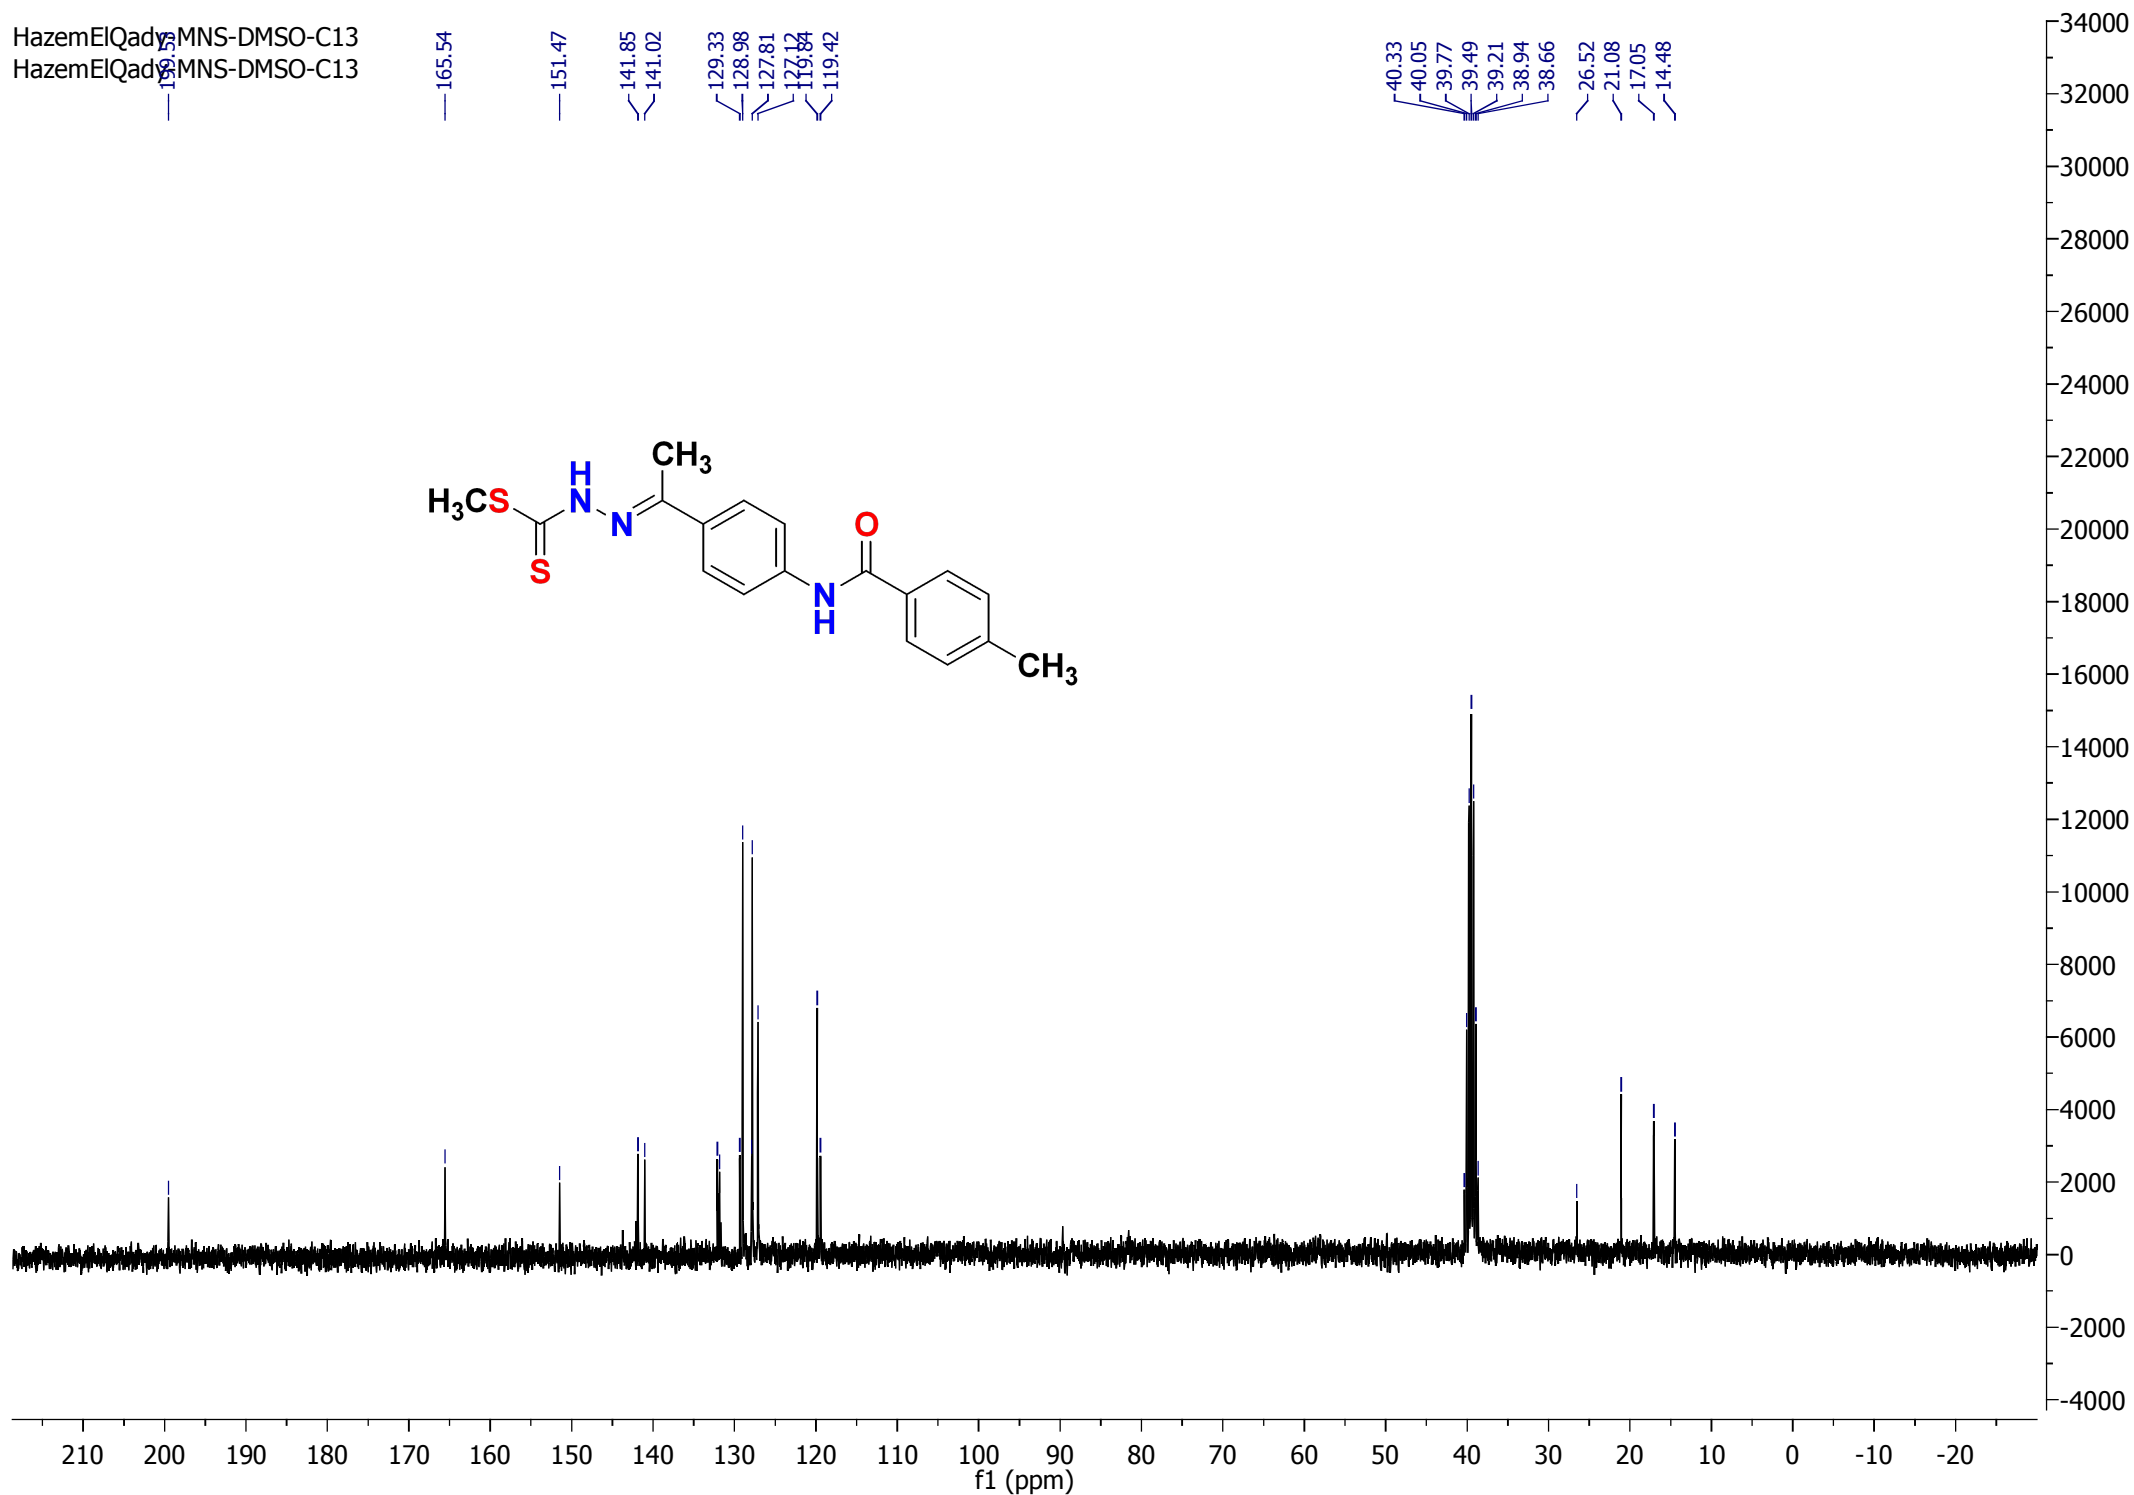



# IR of compound 14

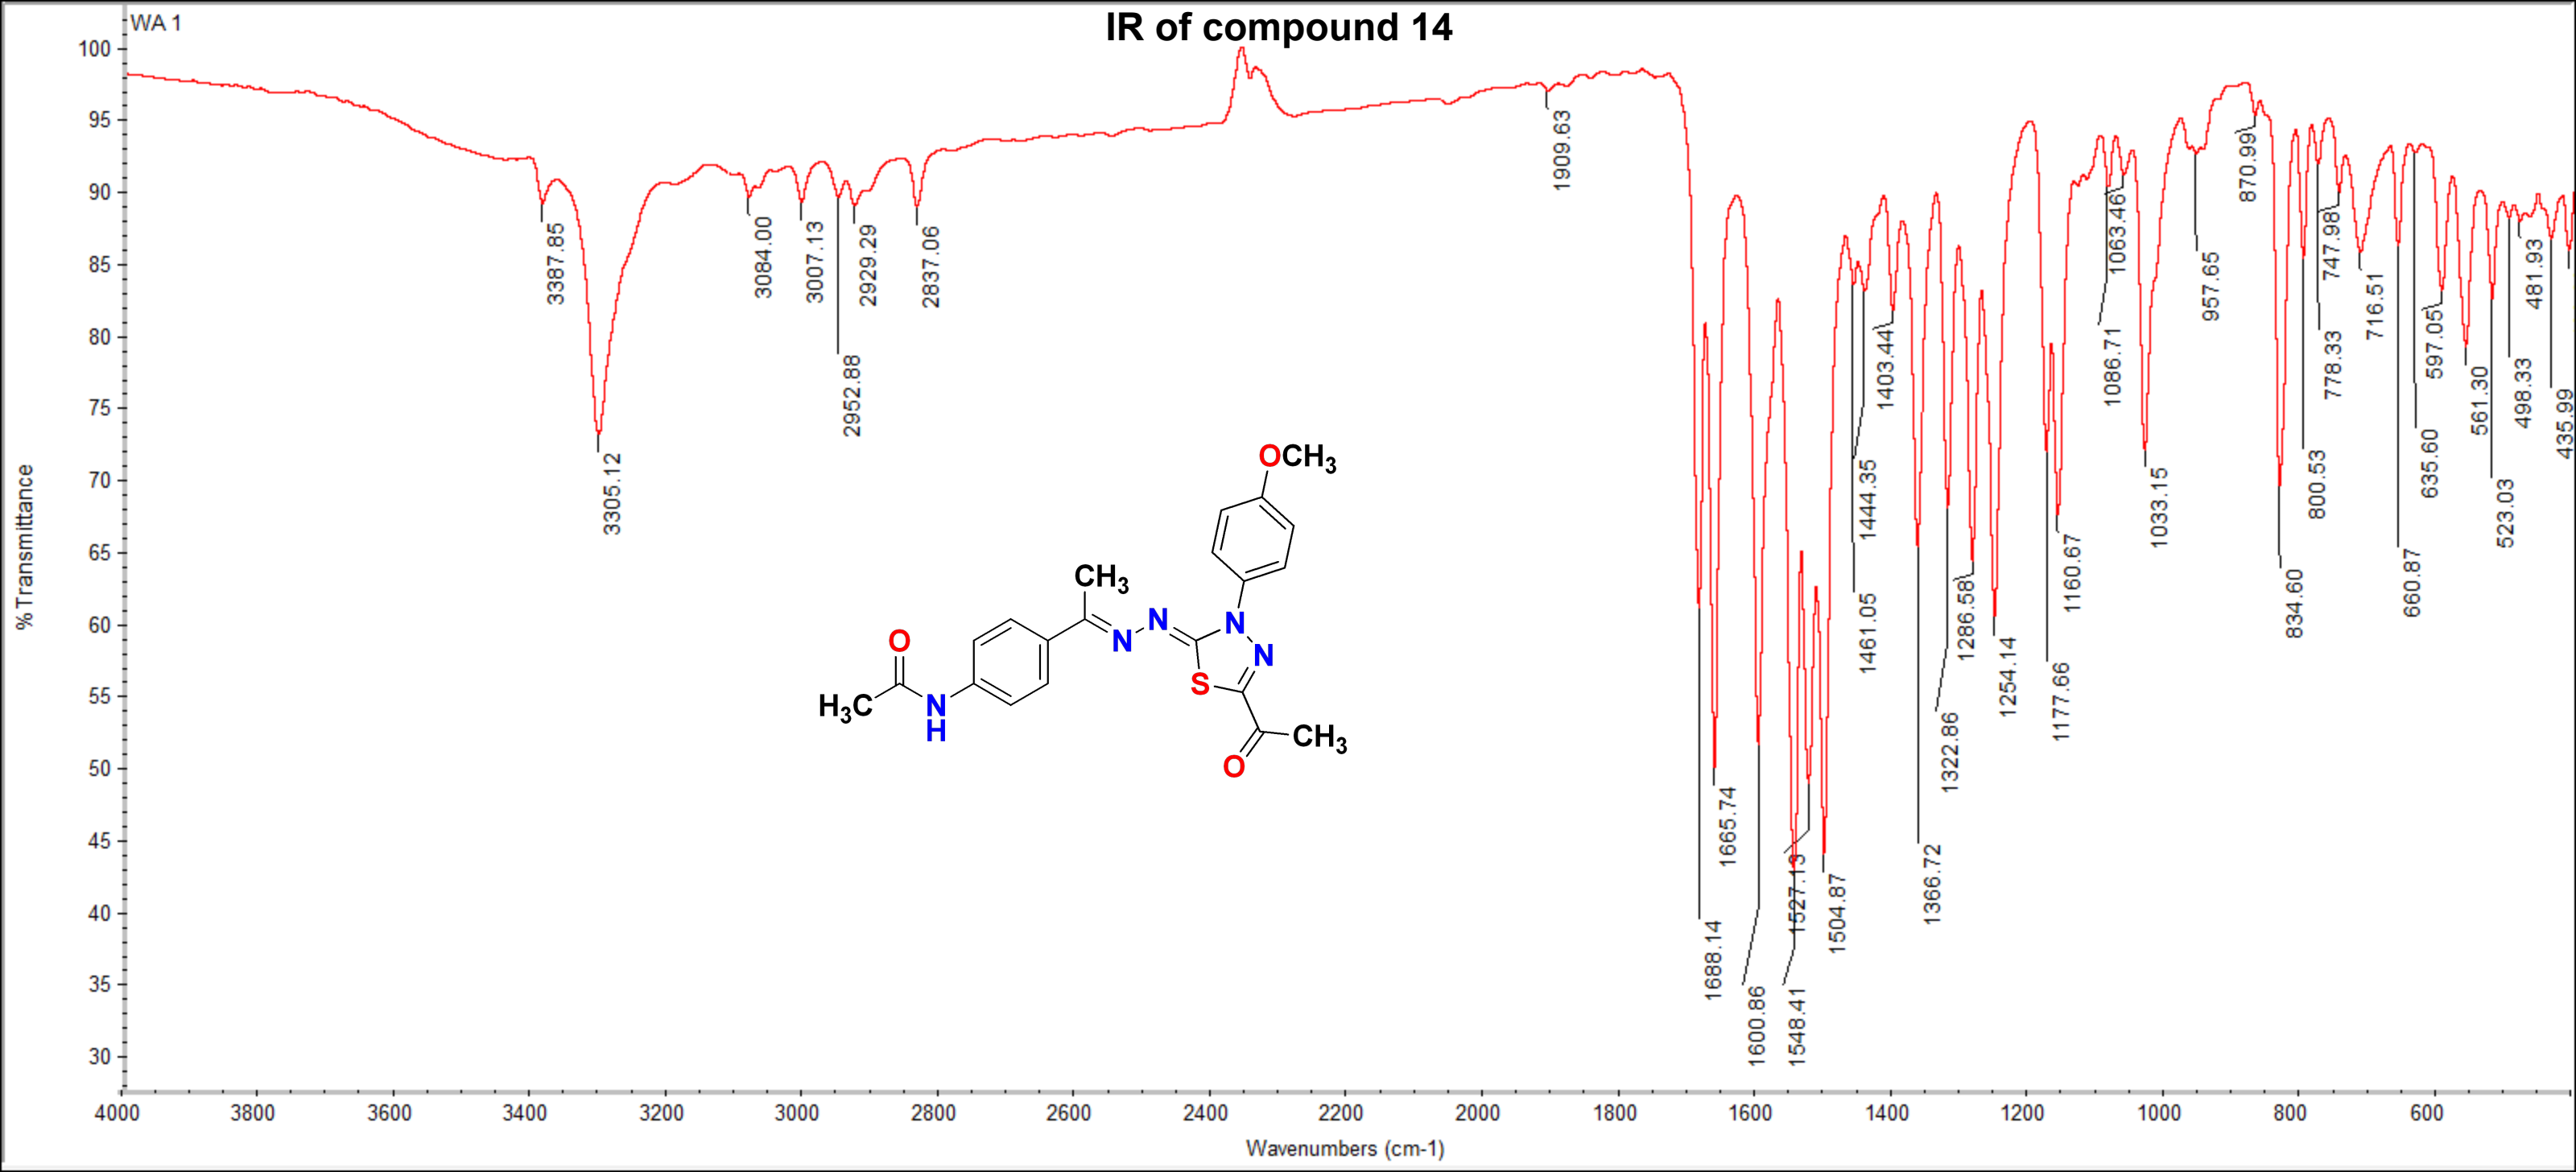

# **<sup>1</sup>H NMR of compound 14**

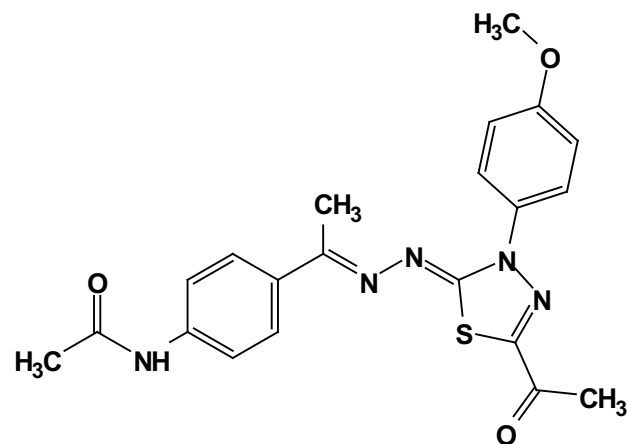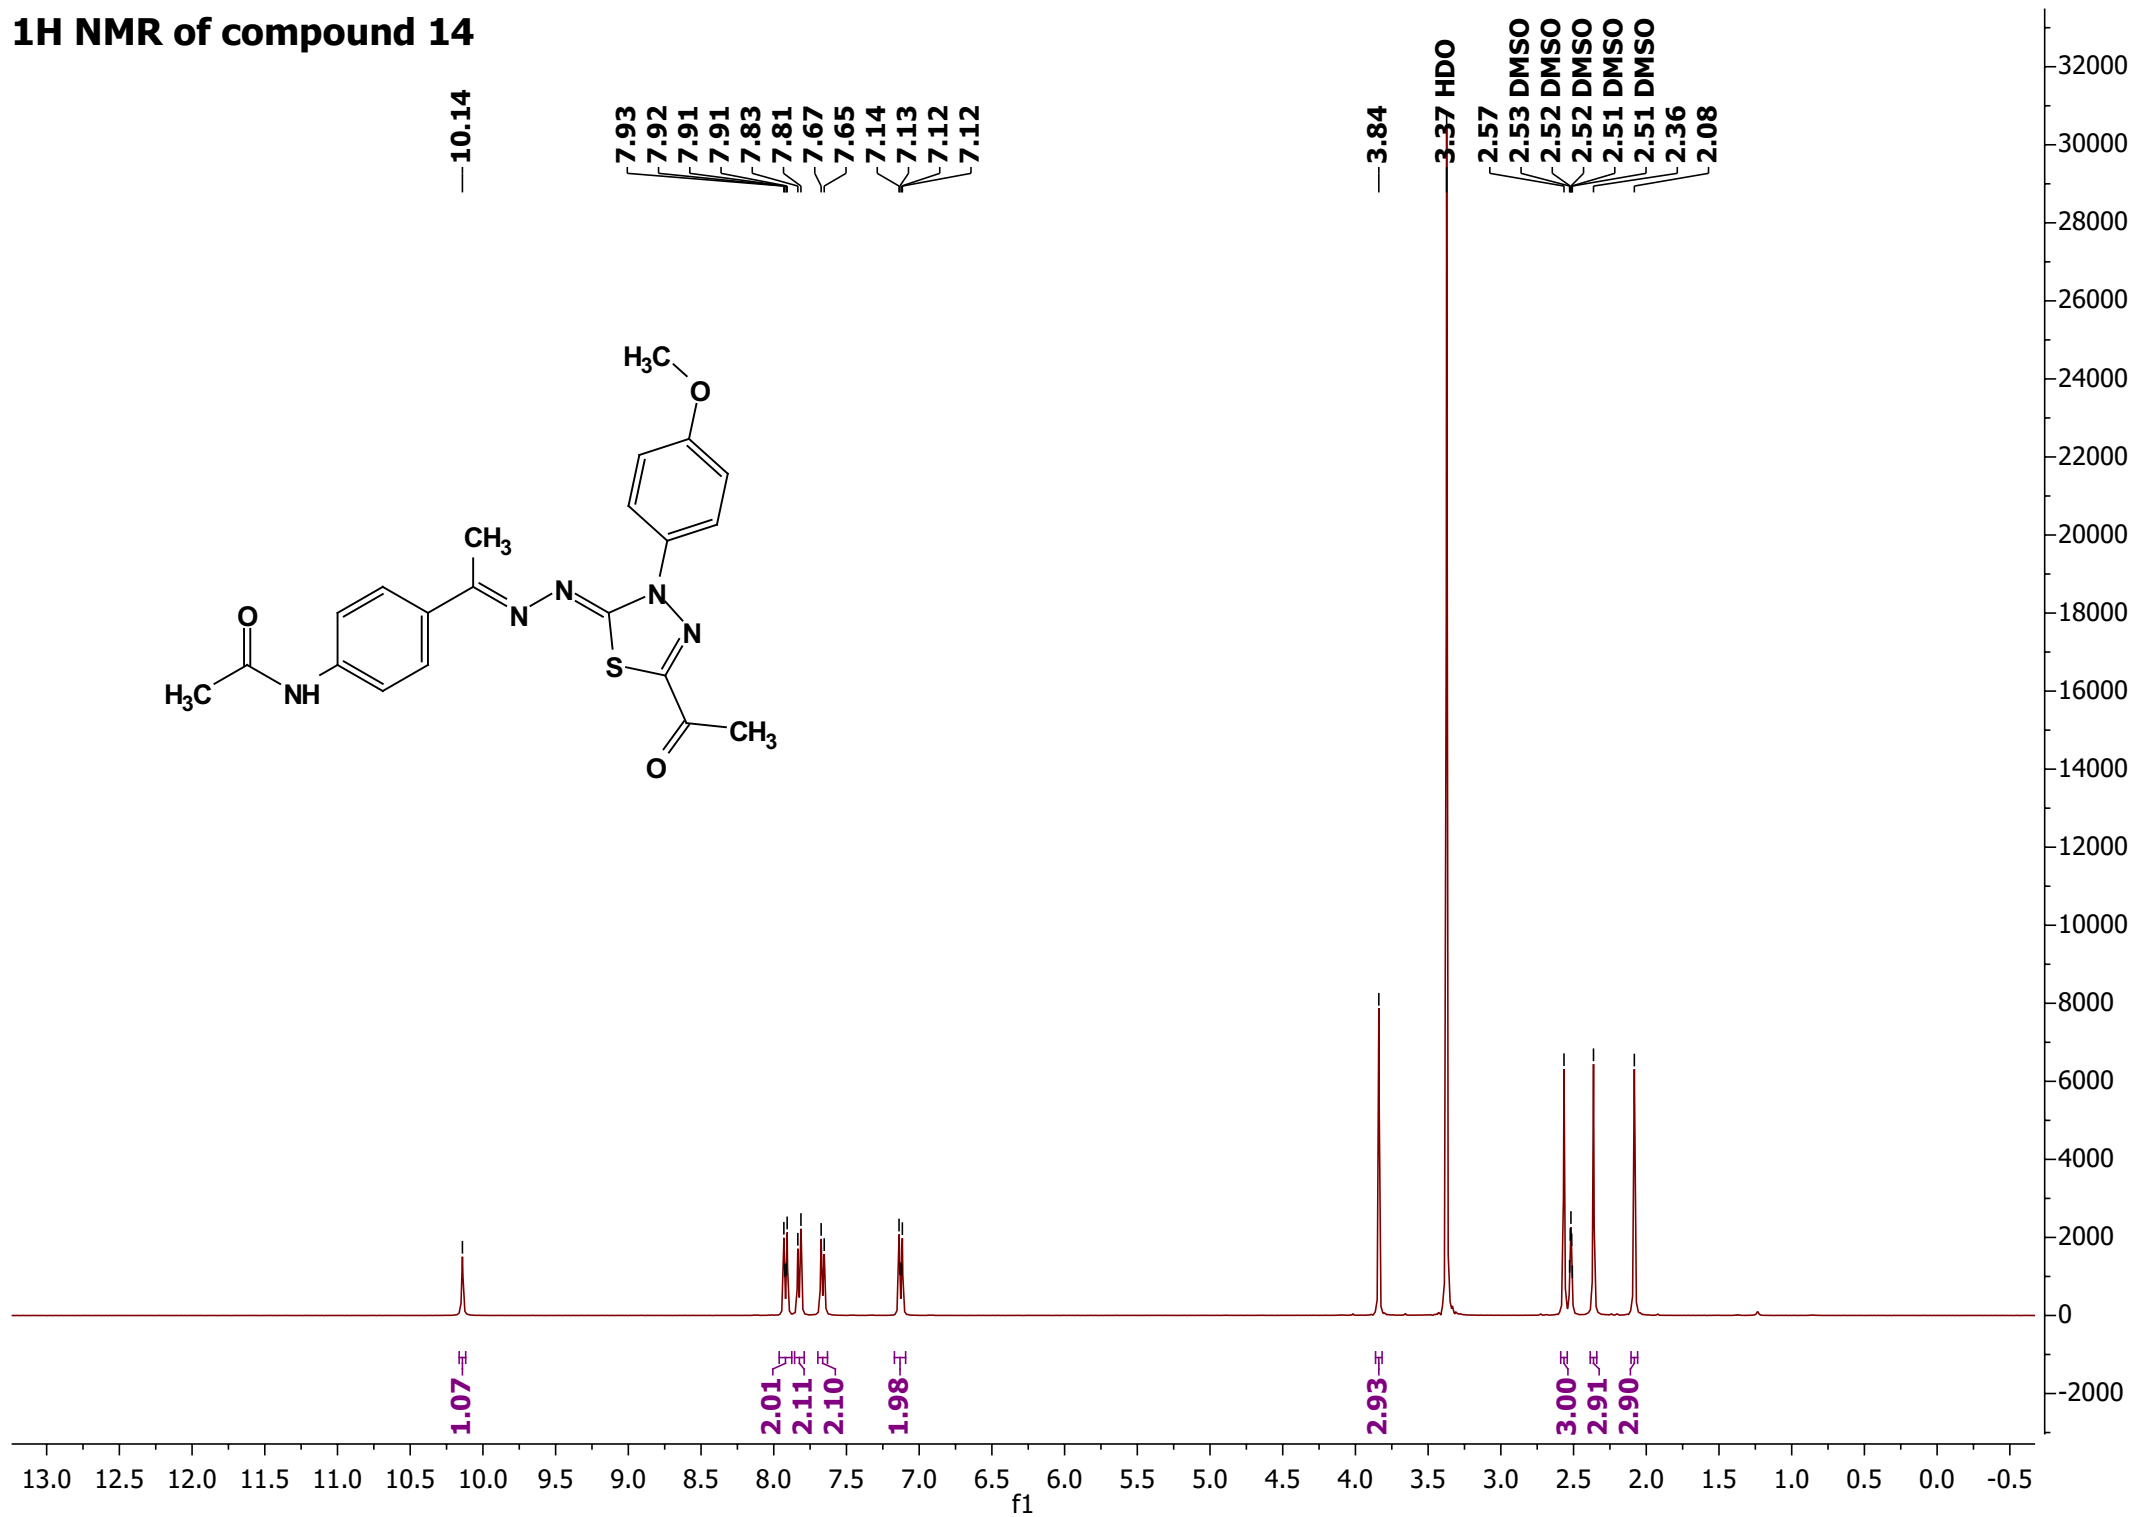

# **<sup>1</sup>H NMR of compound 14**

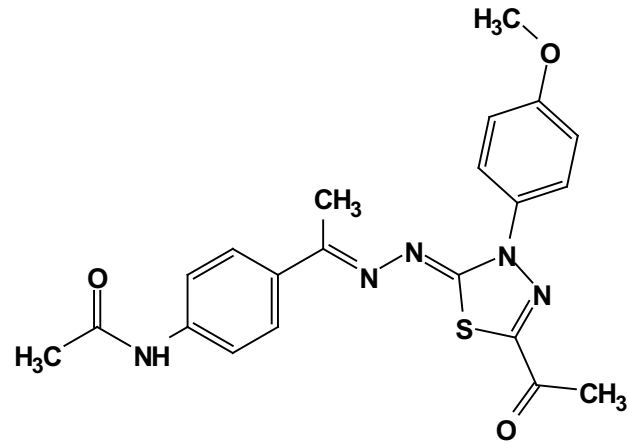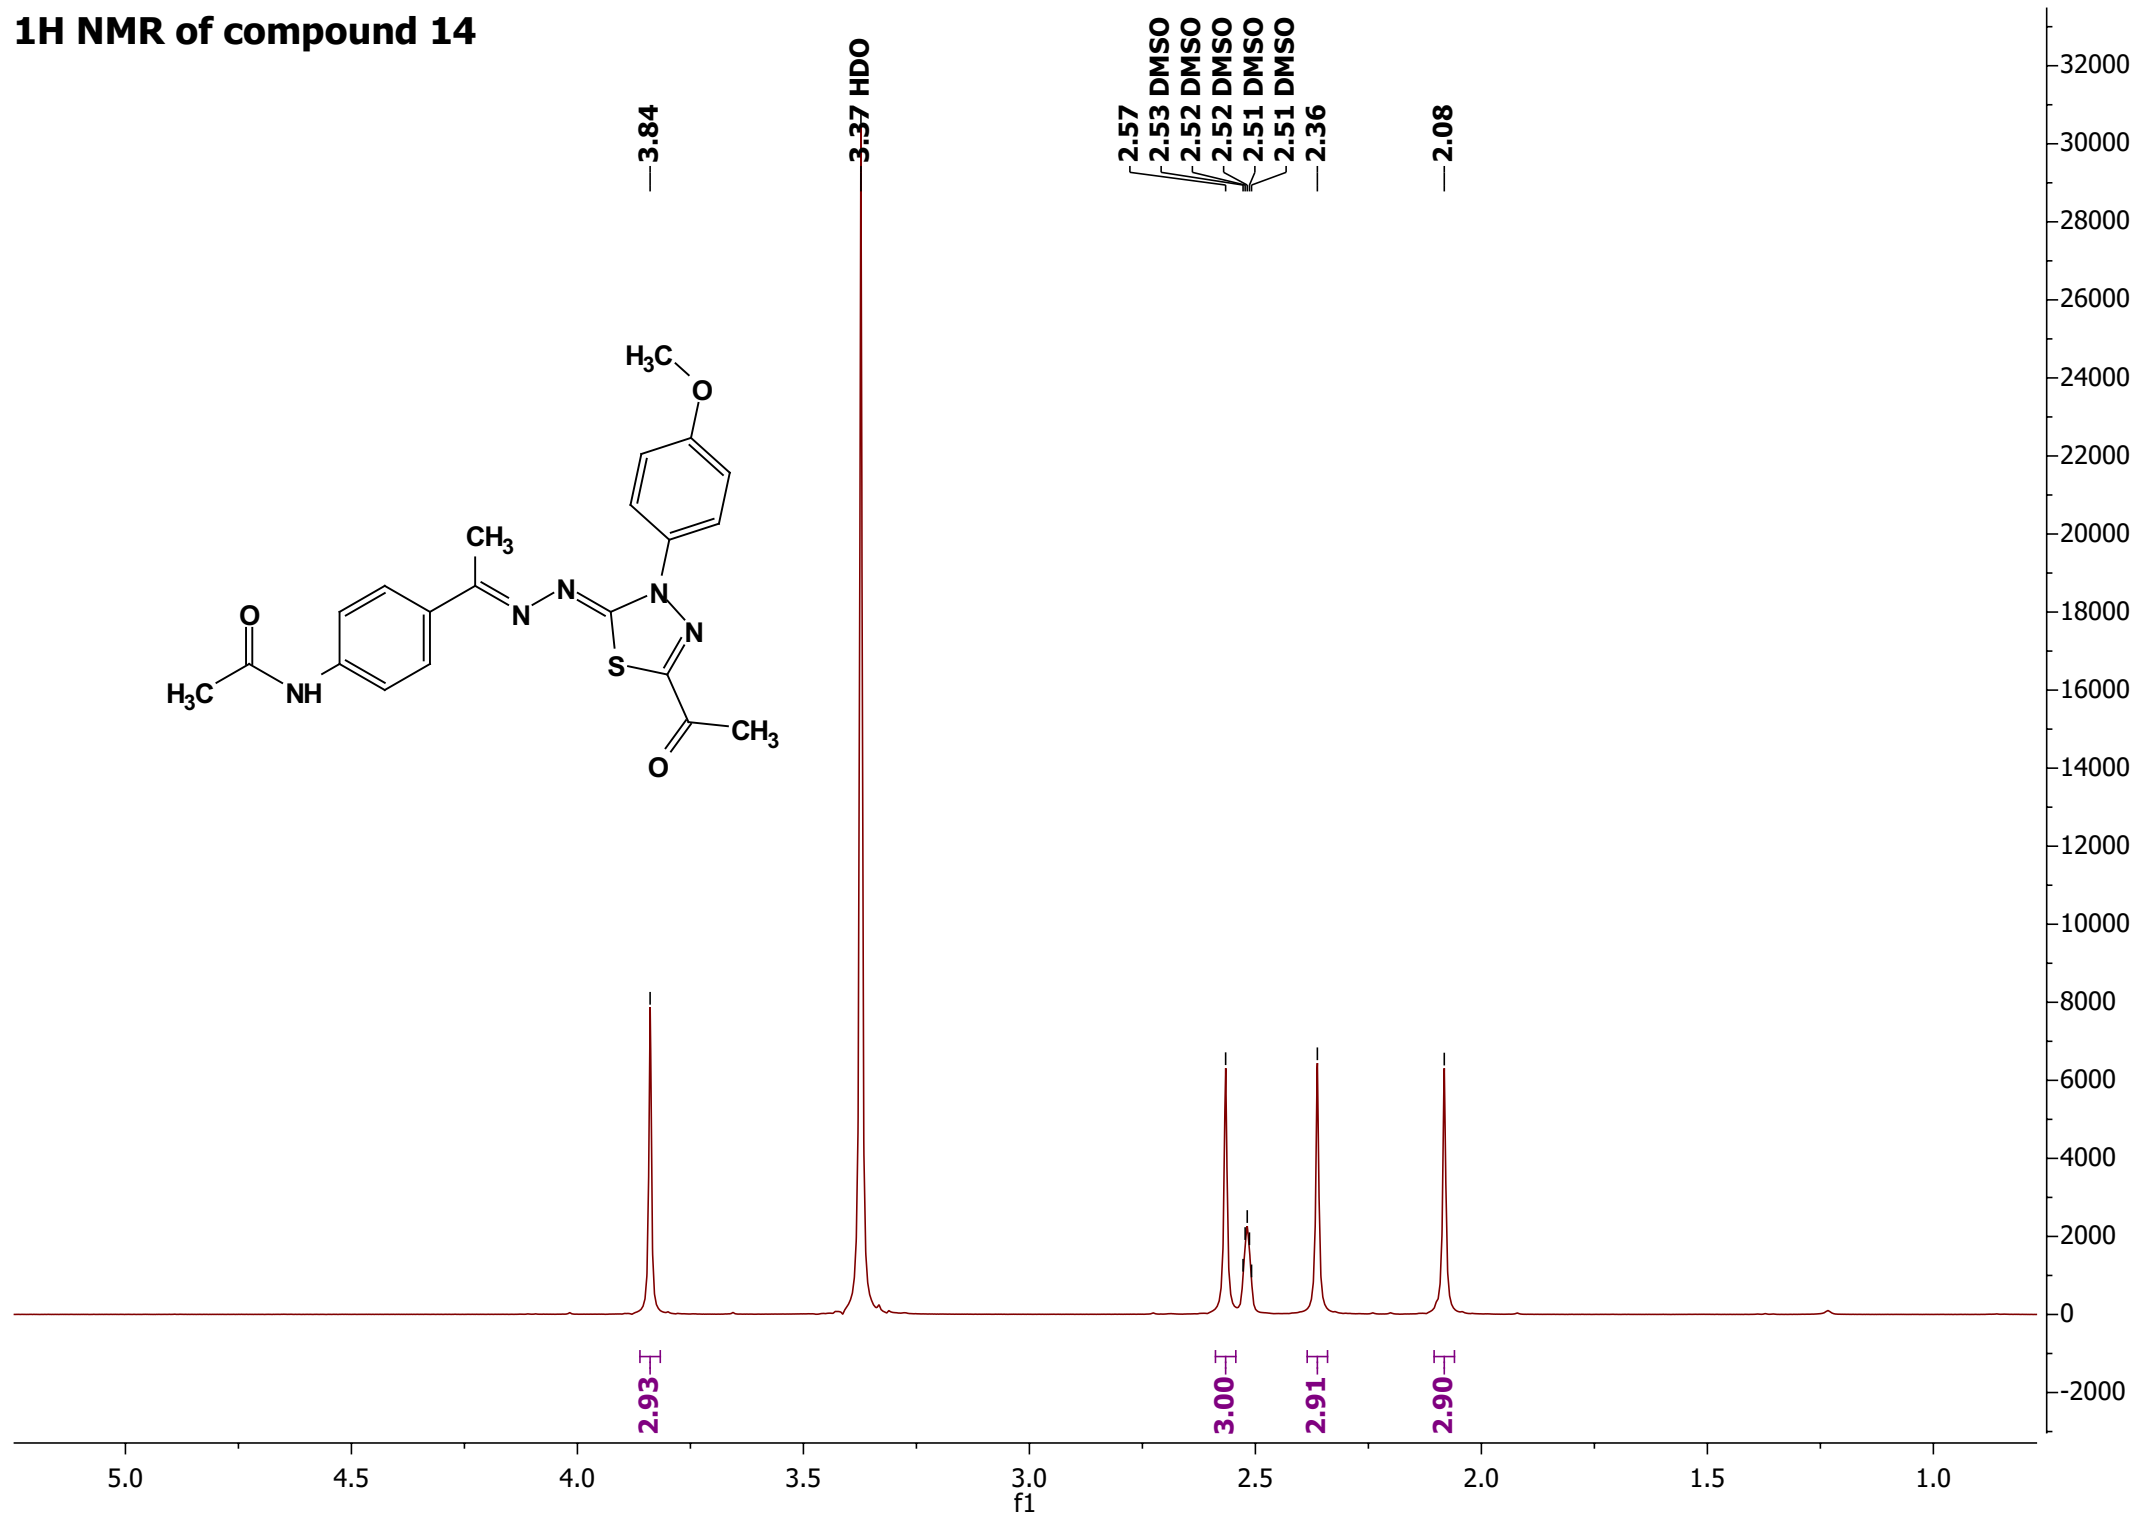

# <sup>1</sup>H NMR of compound 14

7.93  
7.92  
7.91  
7.91  
7.83  
7.81

7.67  
7.65

7.14  
7.13  
7.12  
7.12

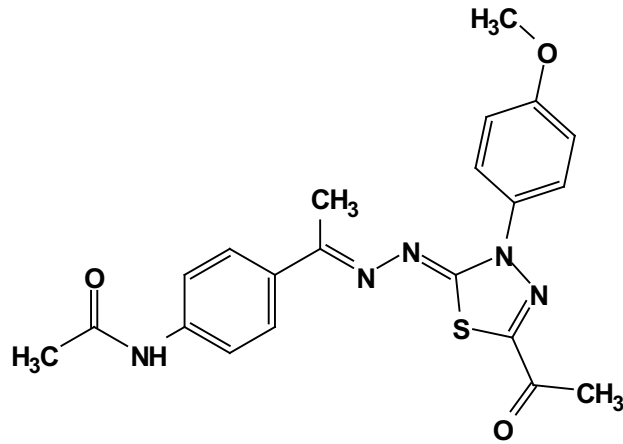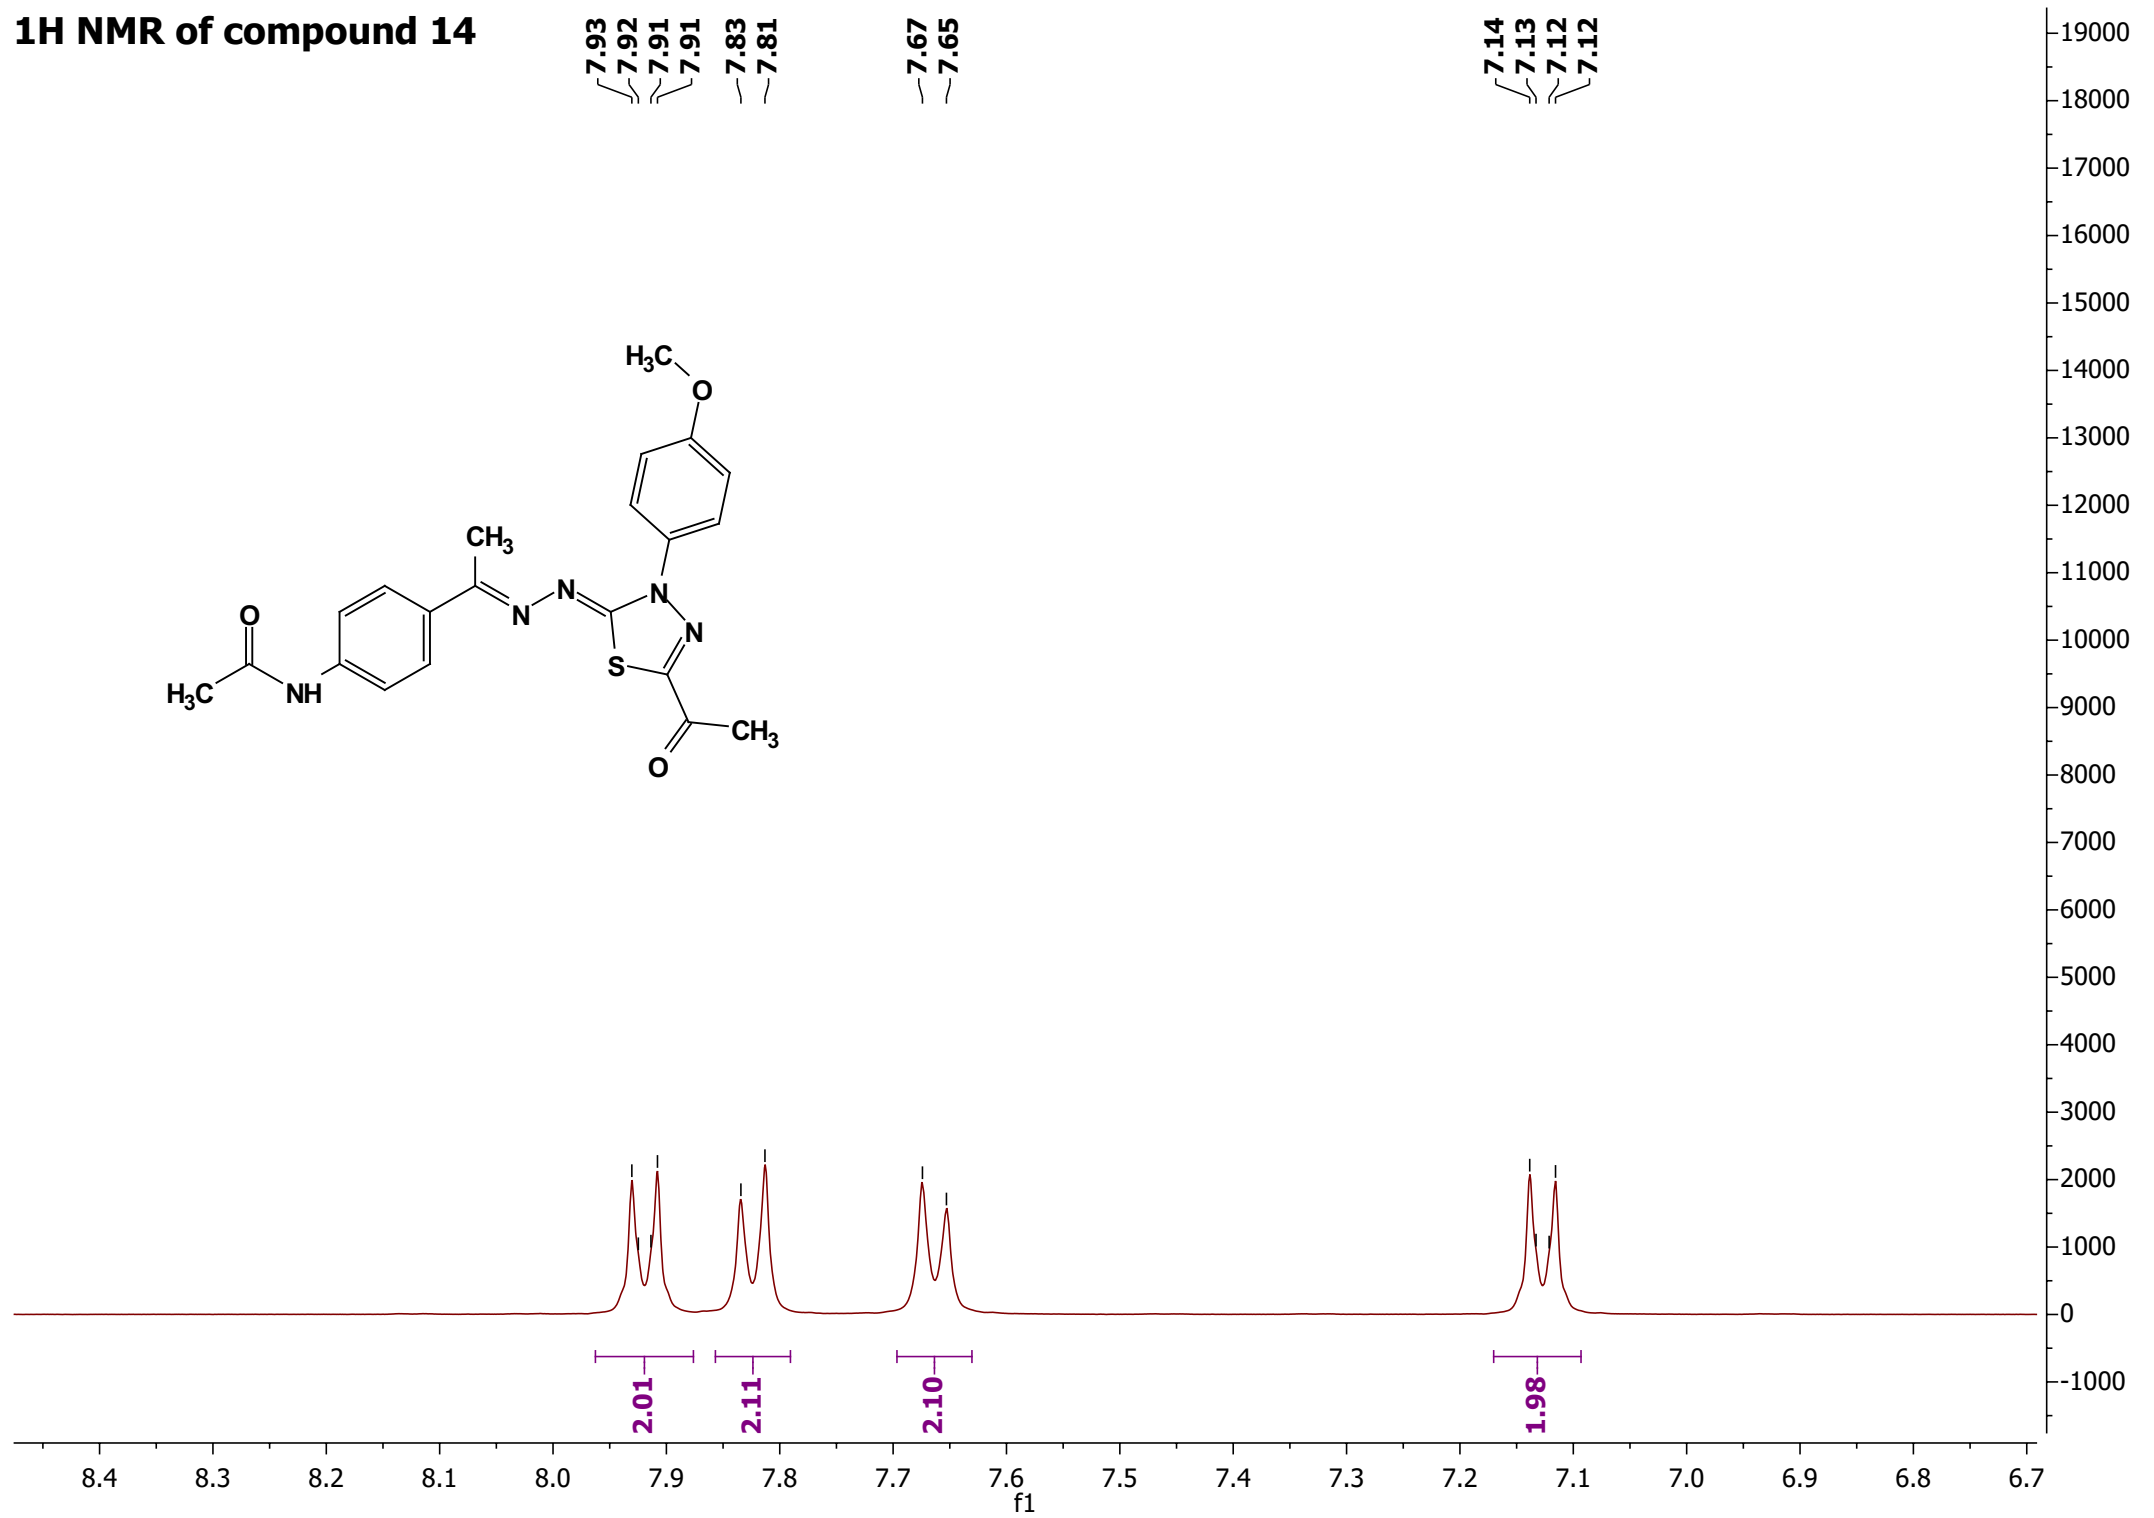

# <sup>13</sup>C NMR of compound 14

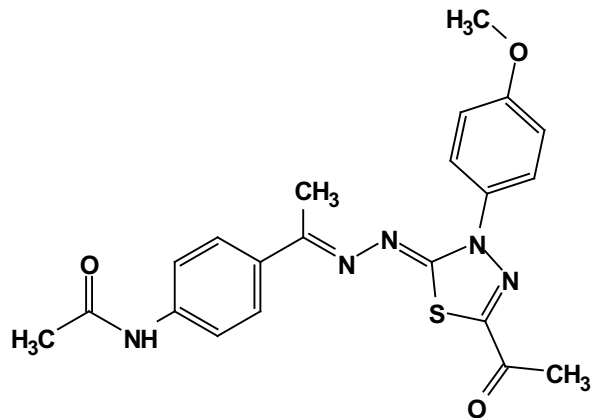

190.13

169.02

164.68

160.01

158.63

150.52

141.32

132.27

132.23

127.52

124.47

119.01

114.66

55.96

40.60 DMSO

40.40 DMSO

40.19 DMSO

39.98 DMSO

39.77 DMSO

39.56 DMSO

39.35 DMSO

25.46

24.56

15.55

210 200 190 180 170 160 150 140 130 120 110 100 90 80 70 60 50 40 30 20 10 0 -10

f1

11000  
10000  
9000  
8000  
7000  
6000  
5000  
4000  
3000  
2000  
1000  
0  
-1000

# <sup>13</sup>C NMR of compound 14

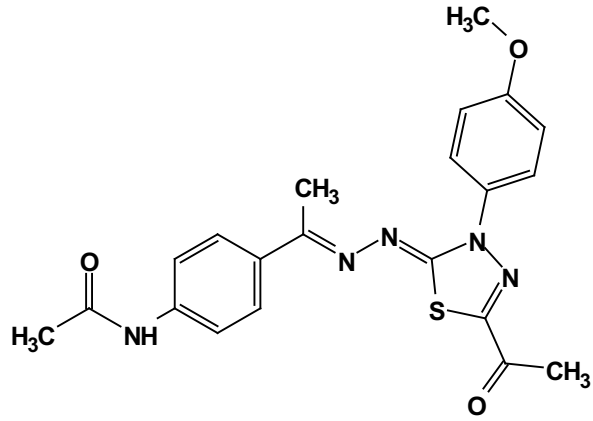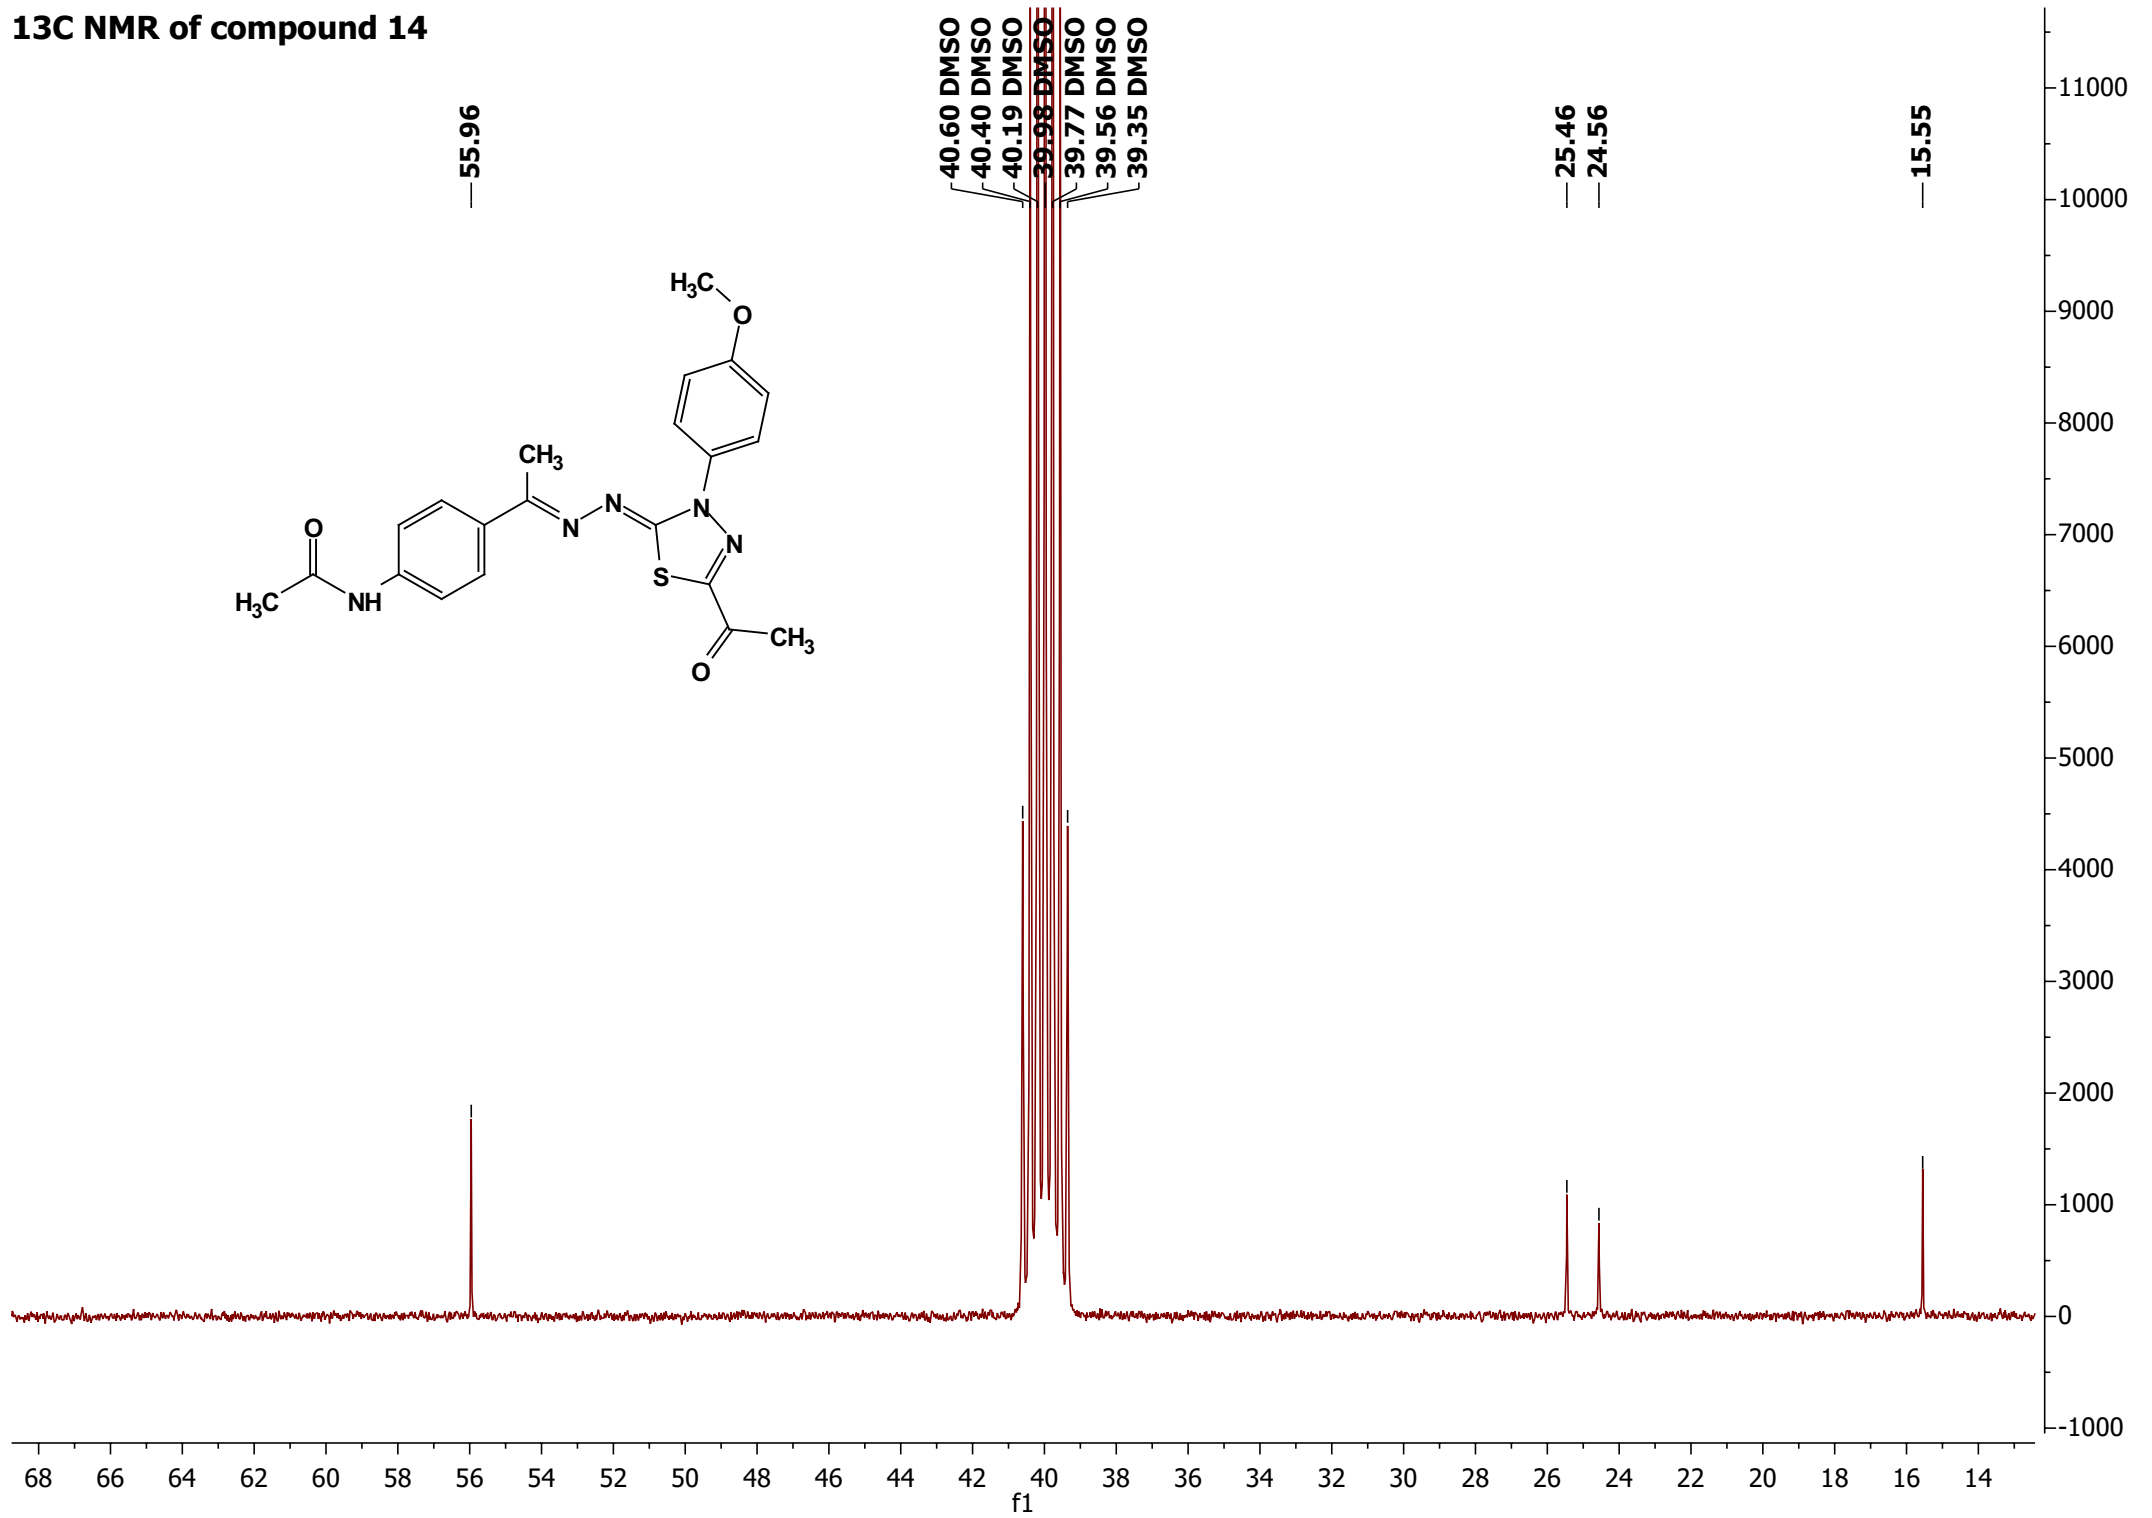

# <sup>13</sup>C NMR of compound 14

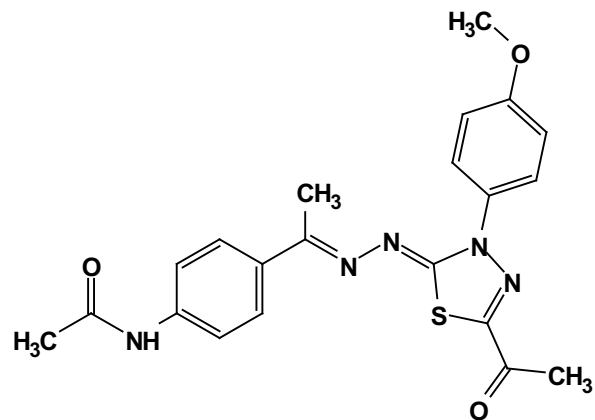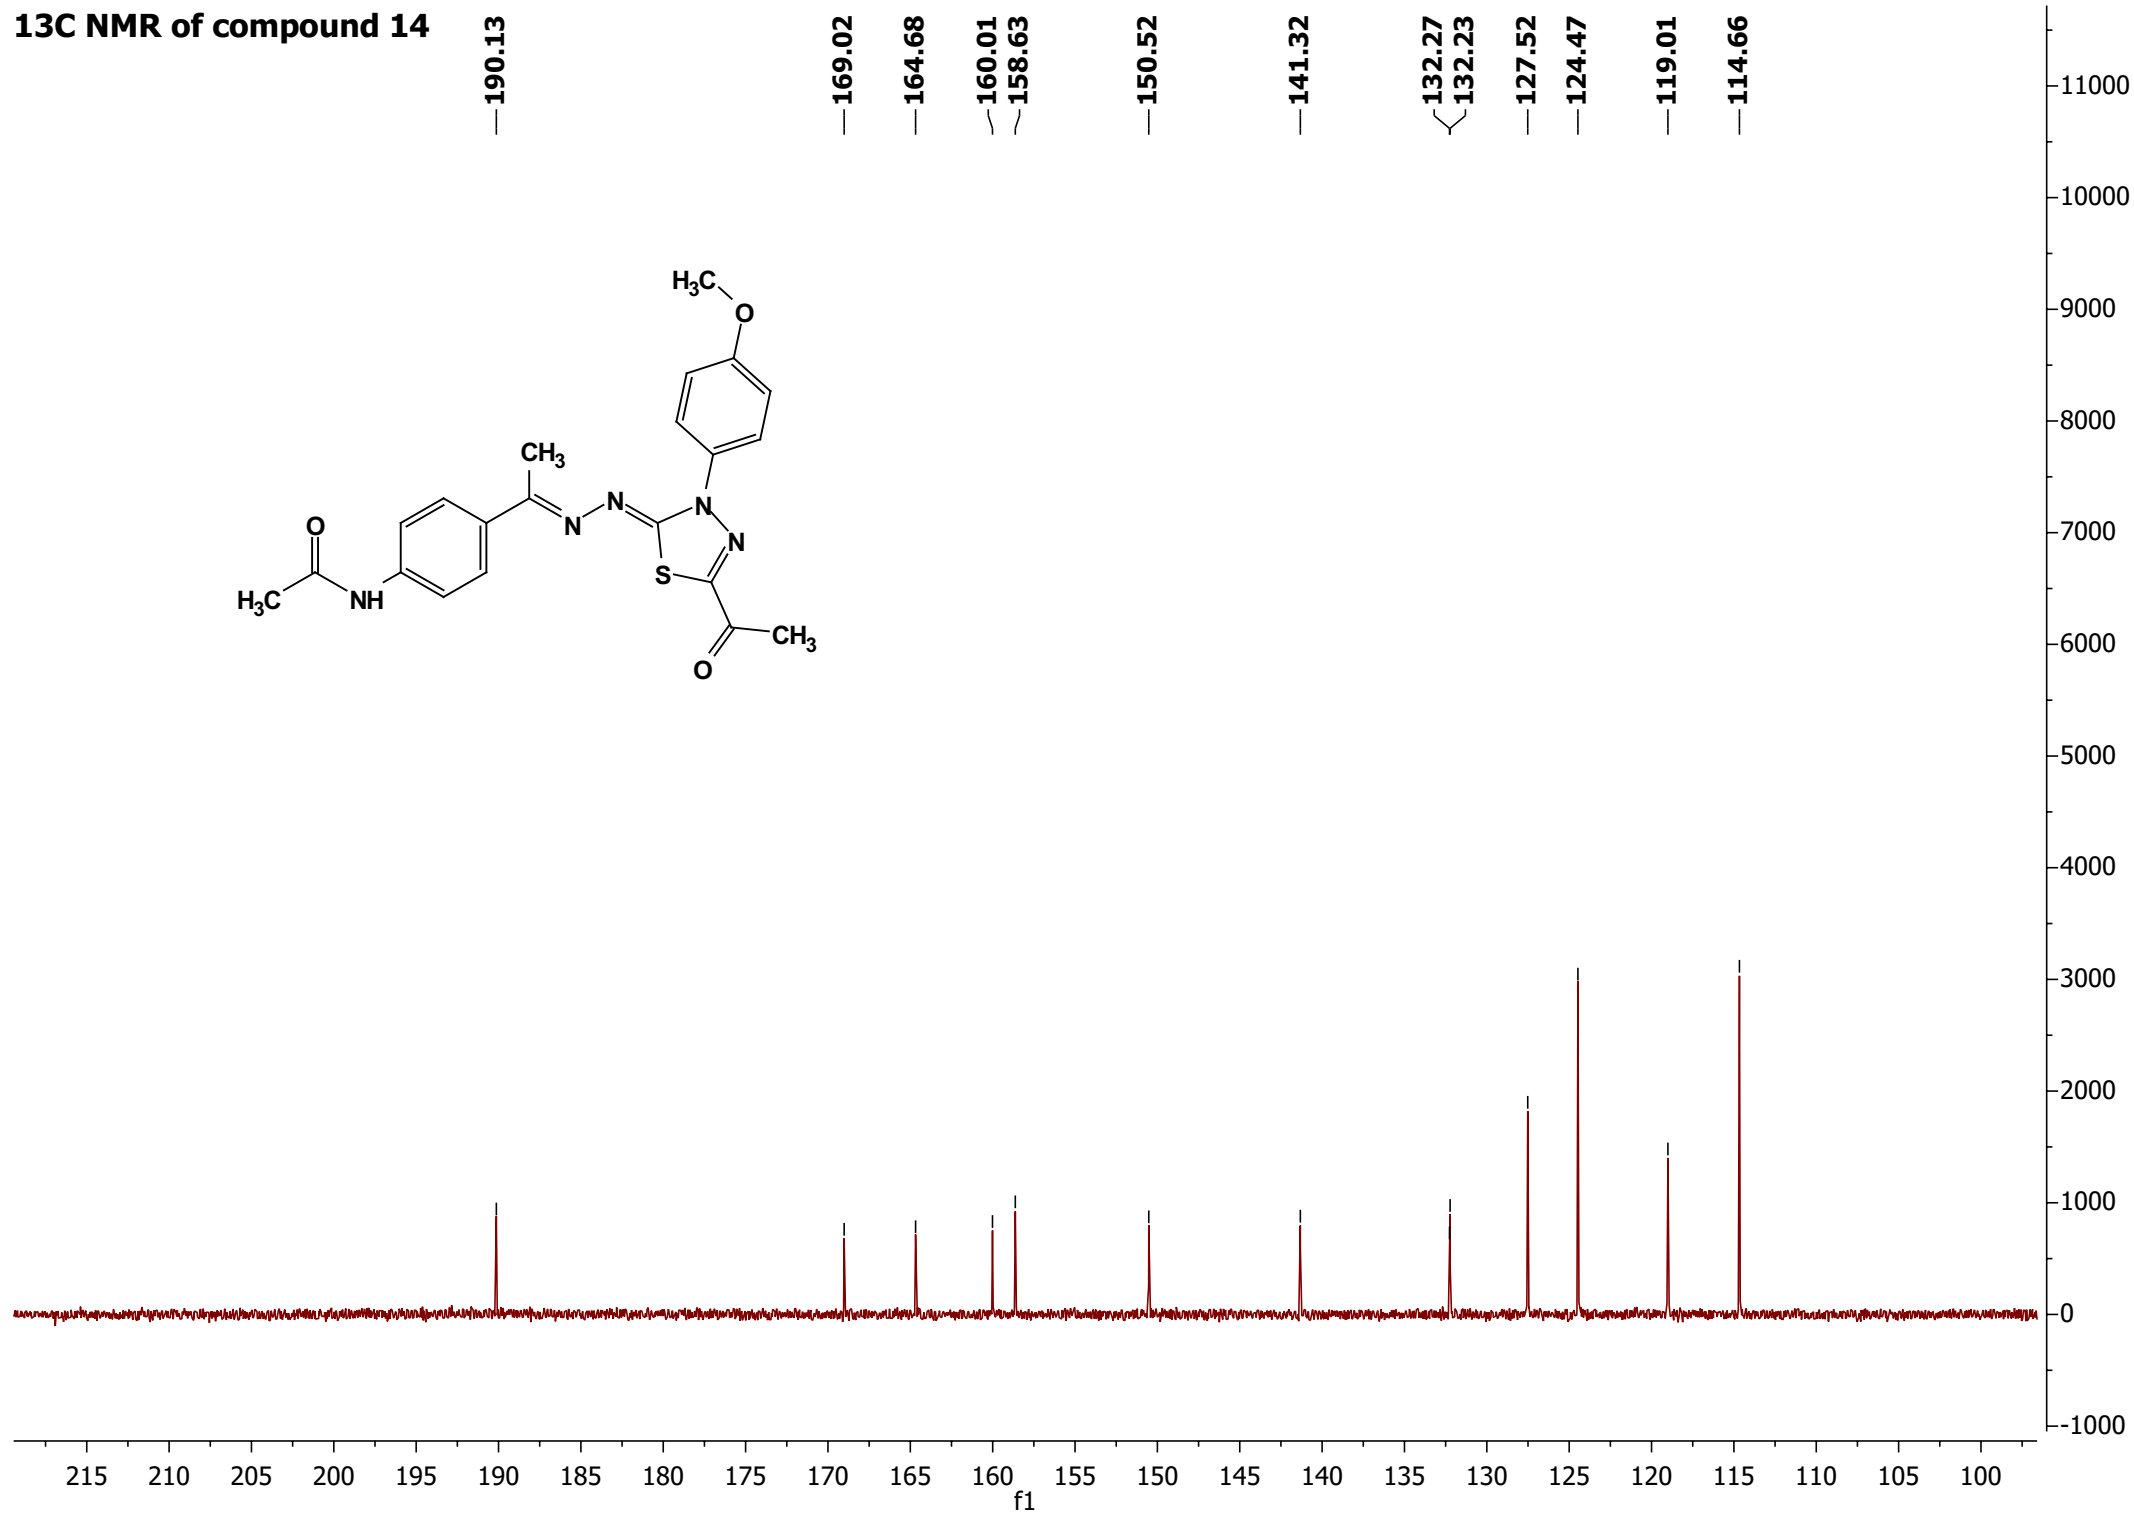

# Mass spec. of compound 14

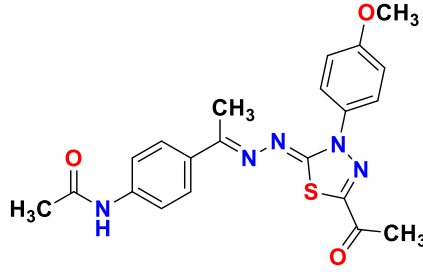

ibrahim-hassan-wa1 #195 RT: 3.28 AV: 1 SB: 2 2.59 , 2.56 NL: 7.55E3  
T: {0,0} + c EI Full ms [40.00-1000.00]

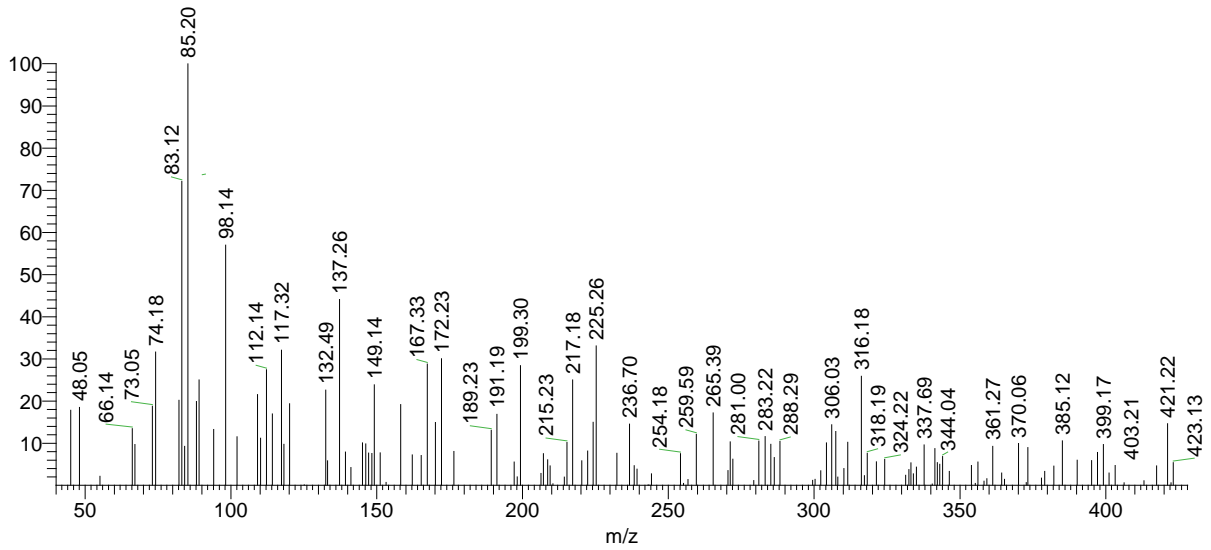



# IR of compound 18a

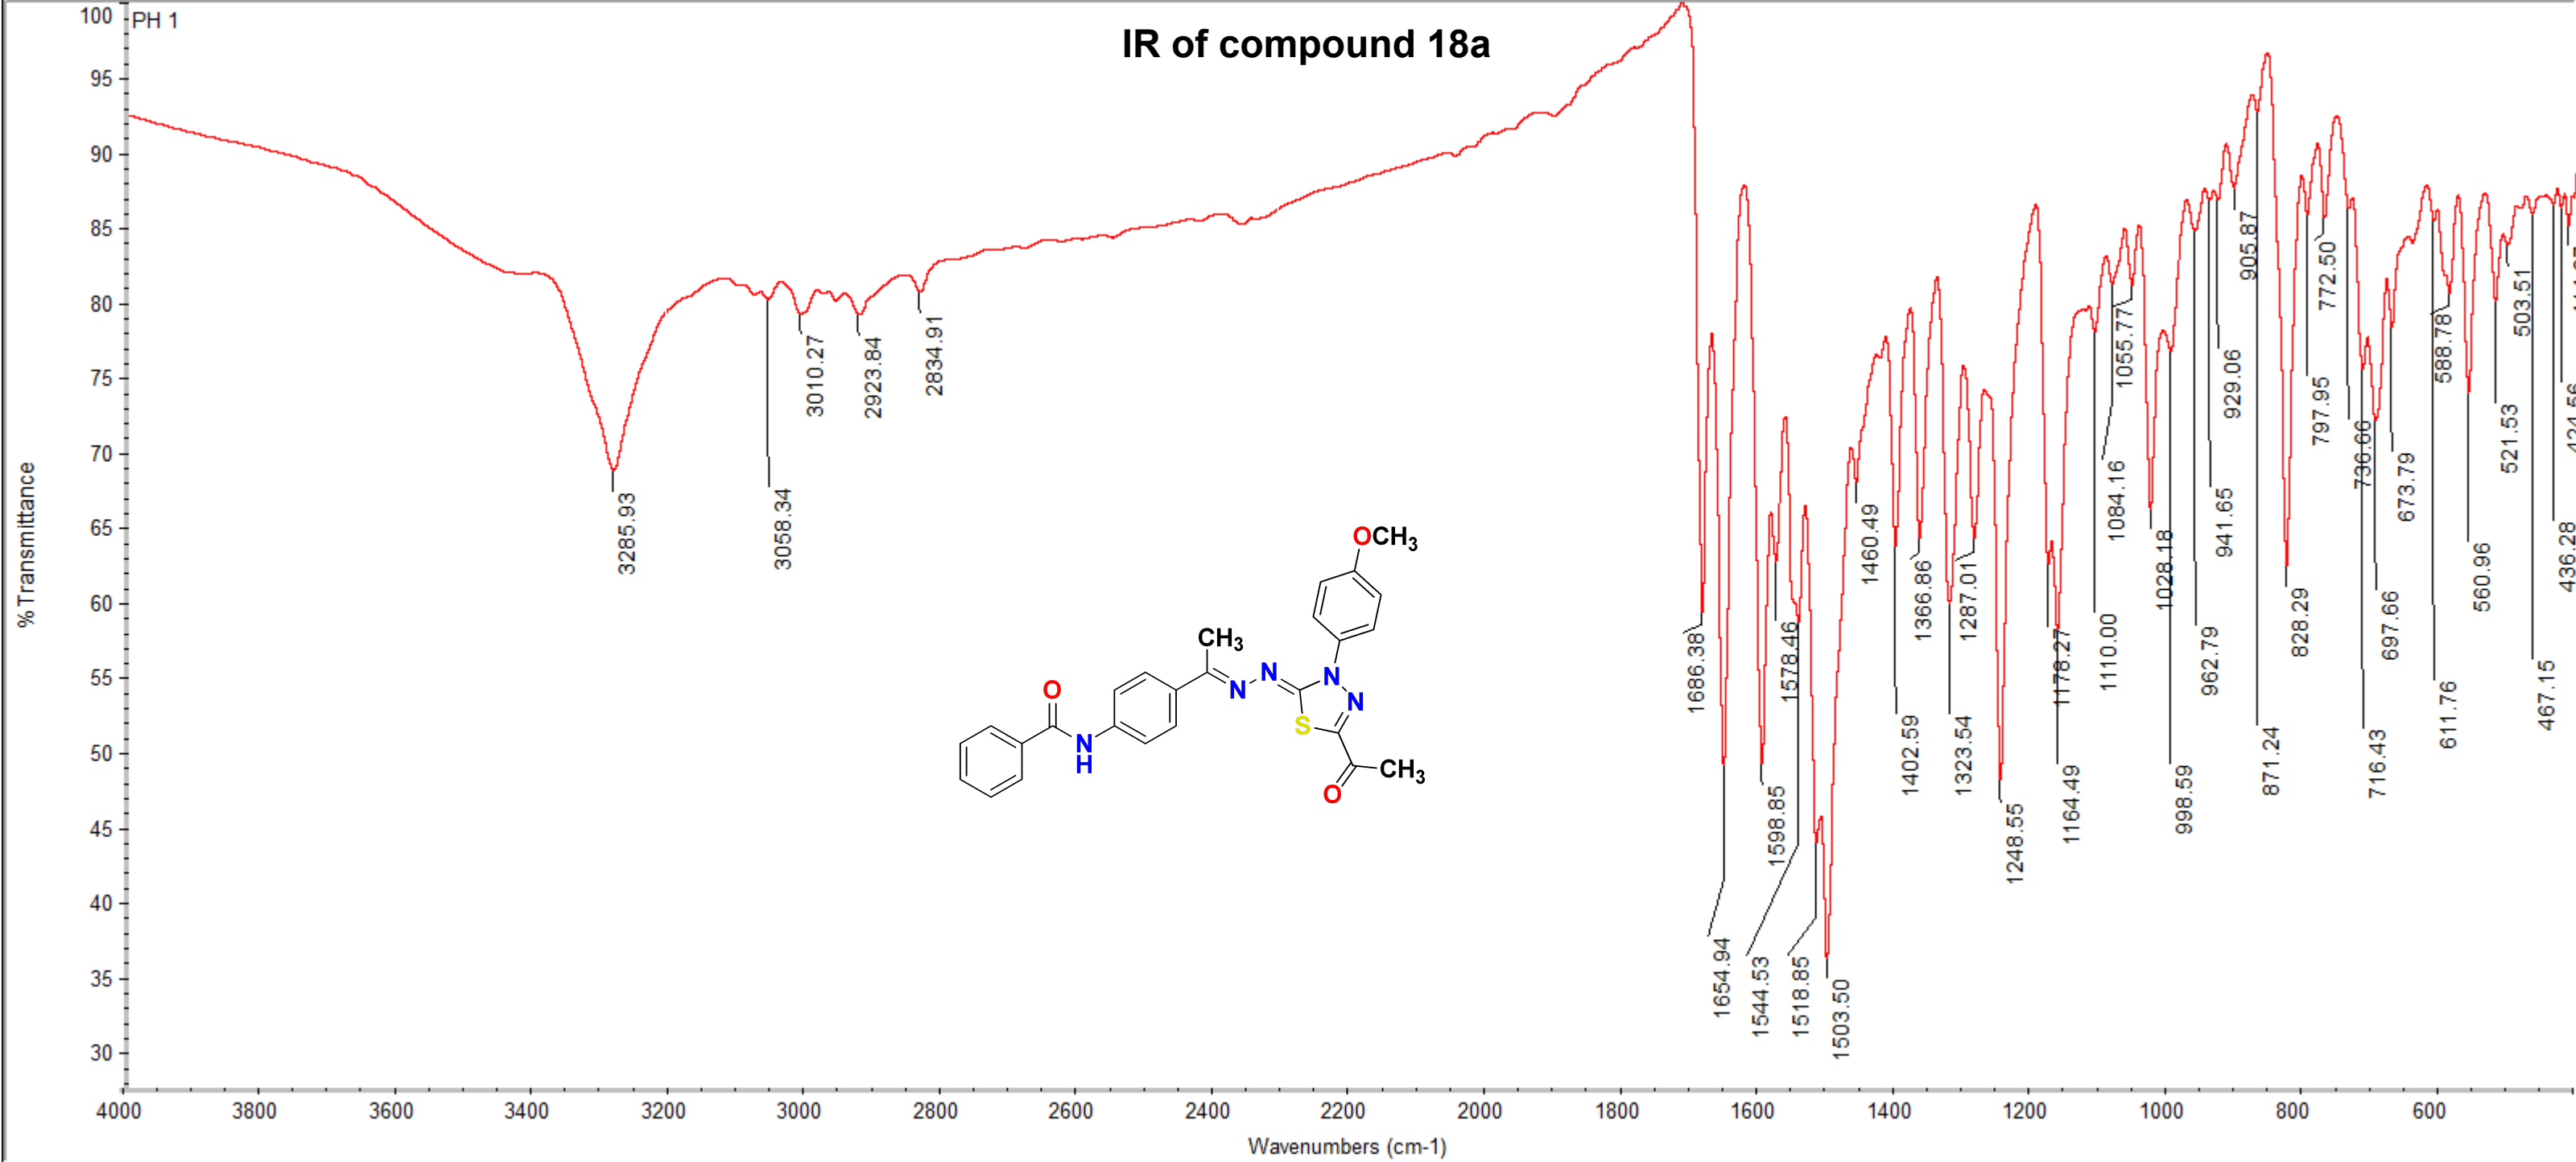

# 1H NMR of compound 18a

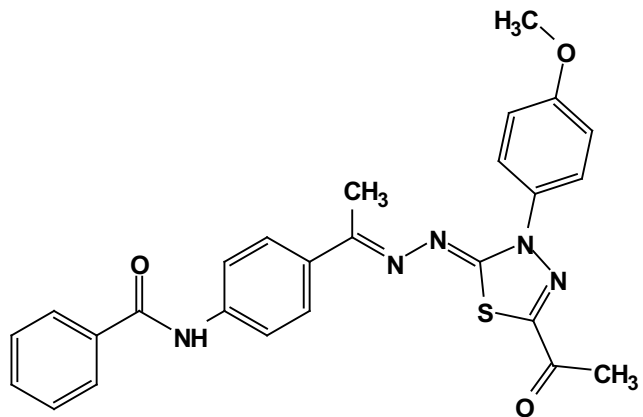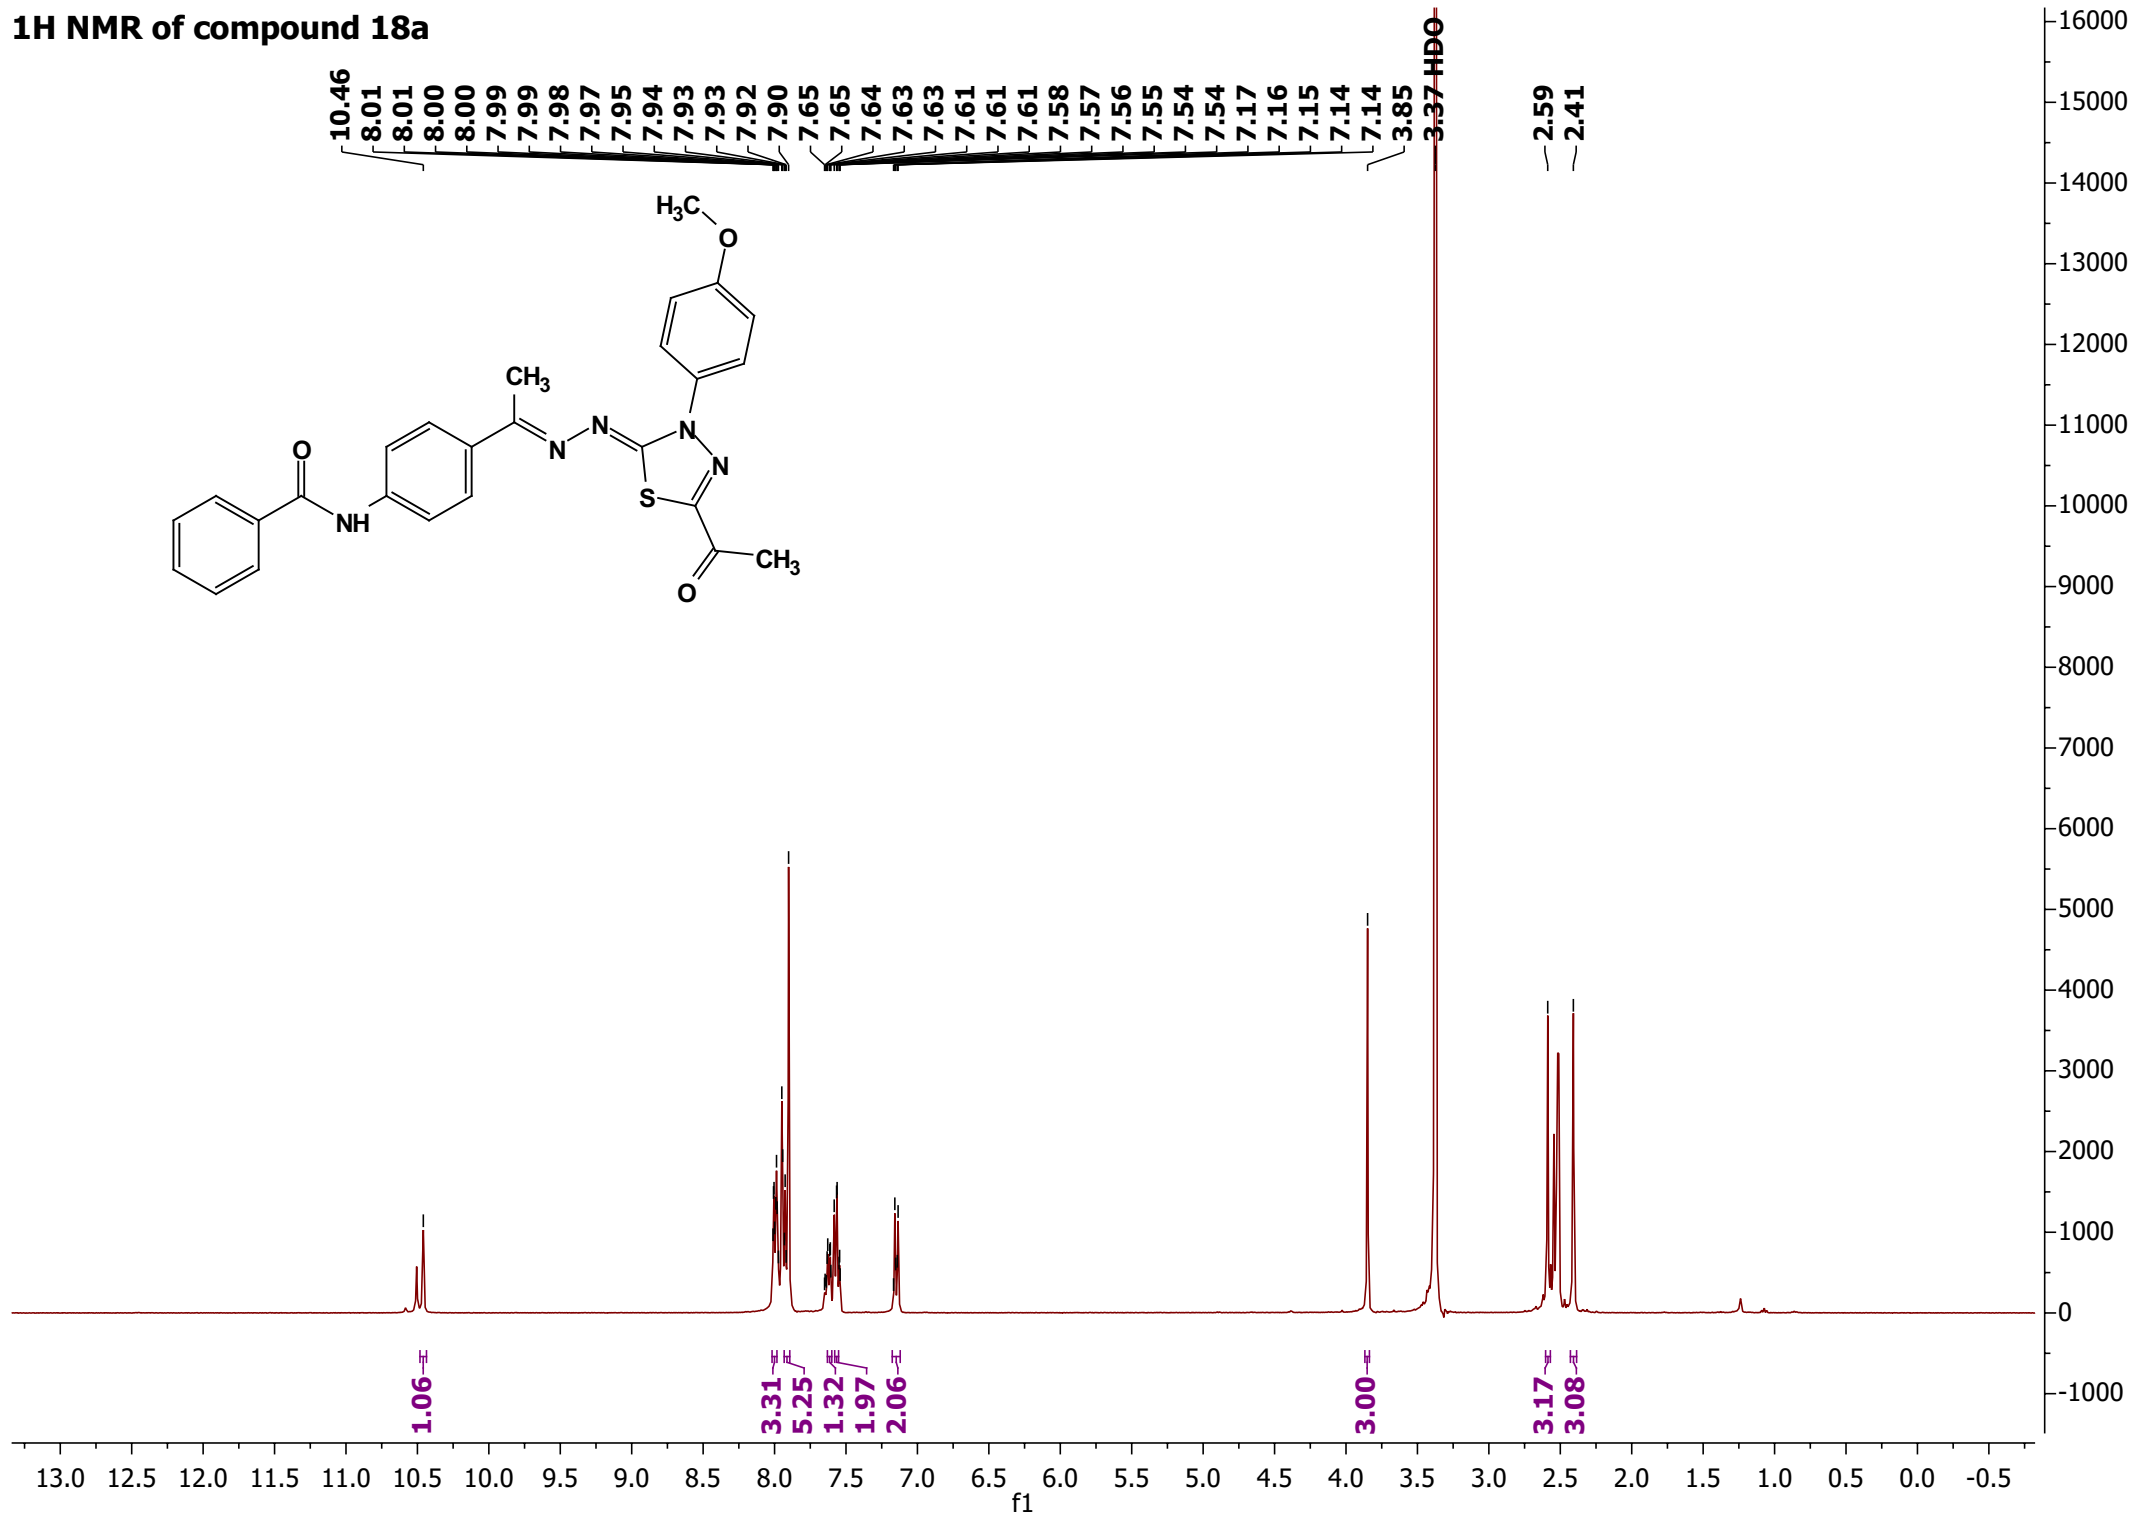

# <sup>1</sup>H NMR of compound 18a

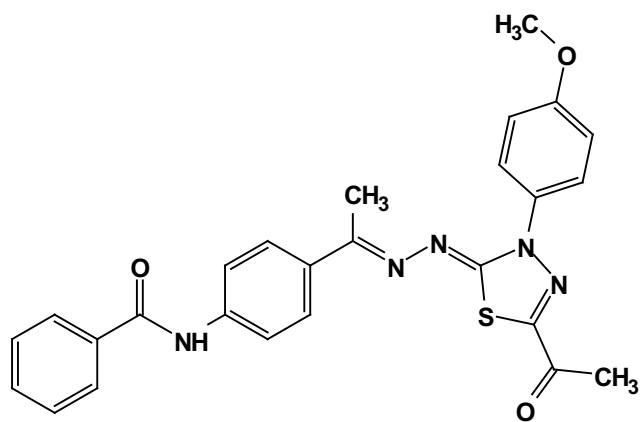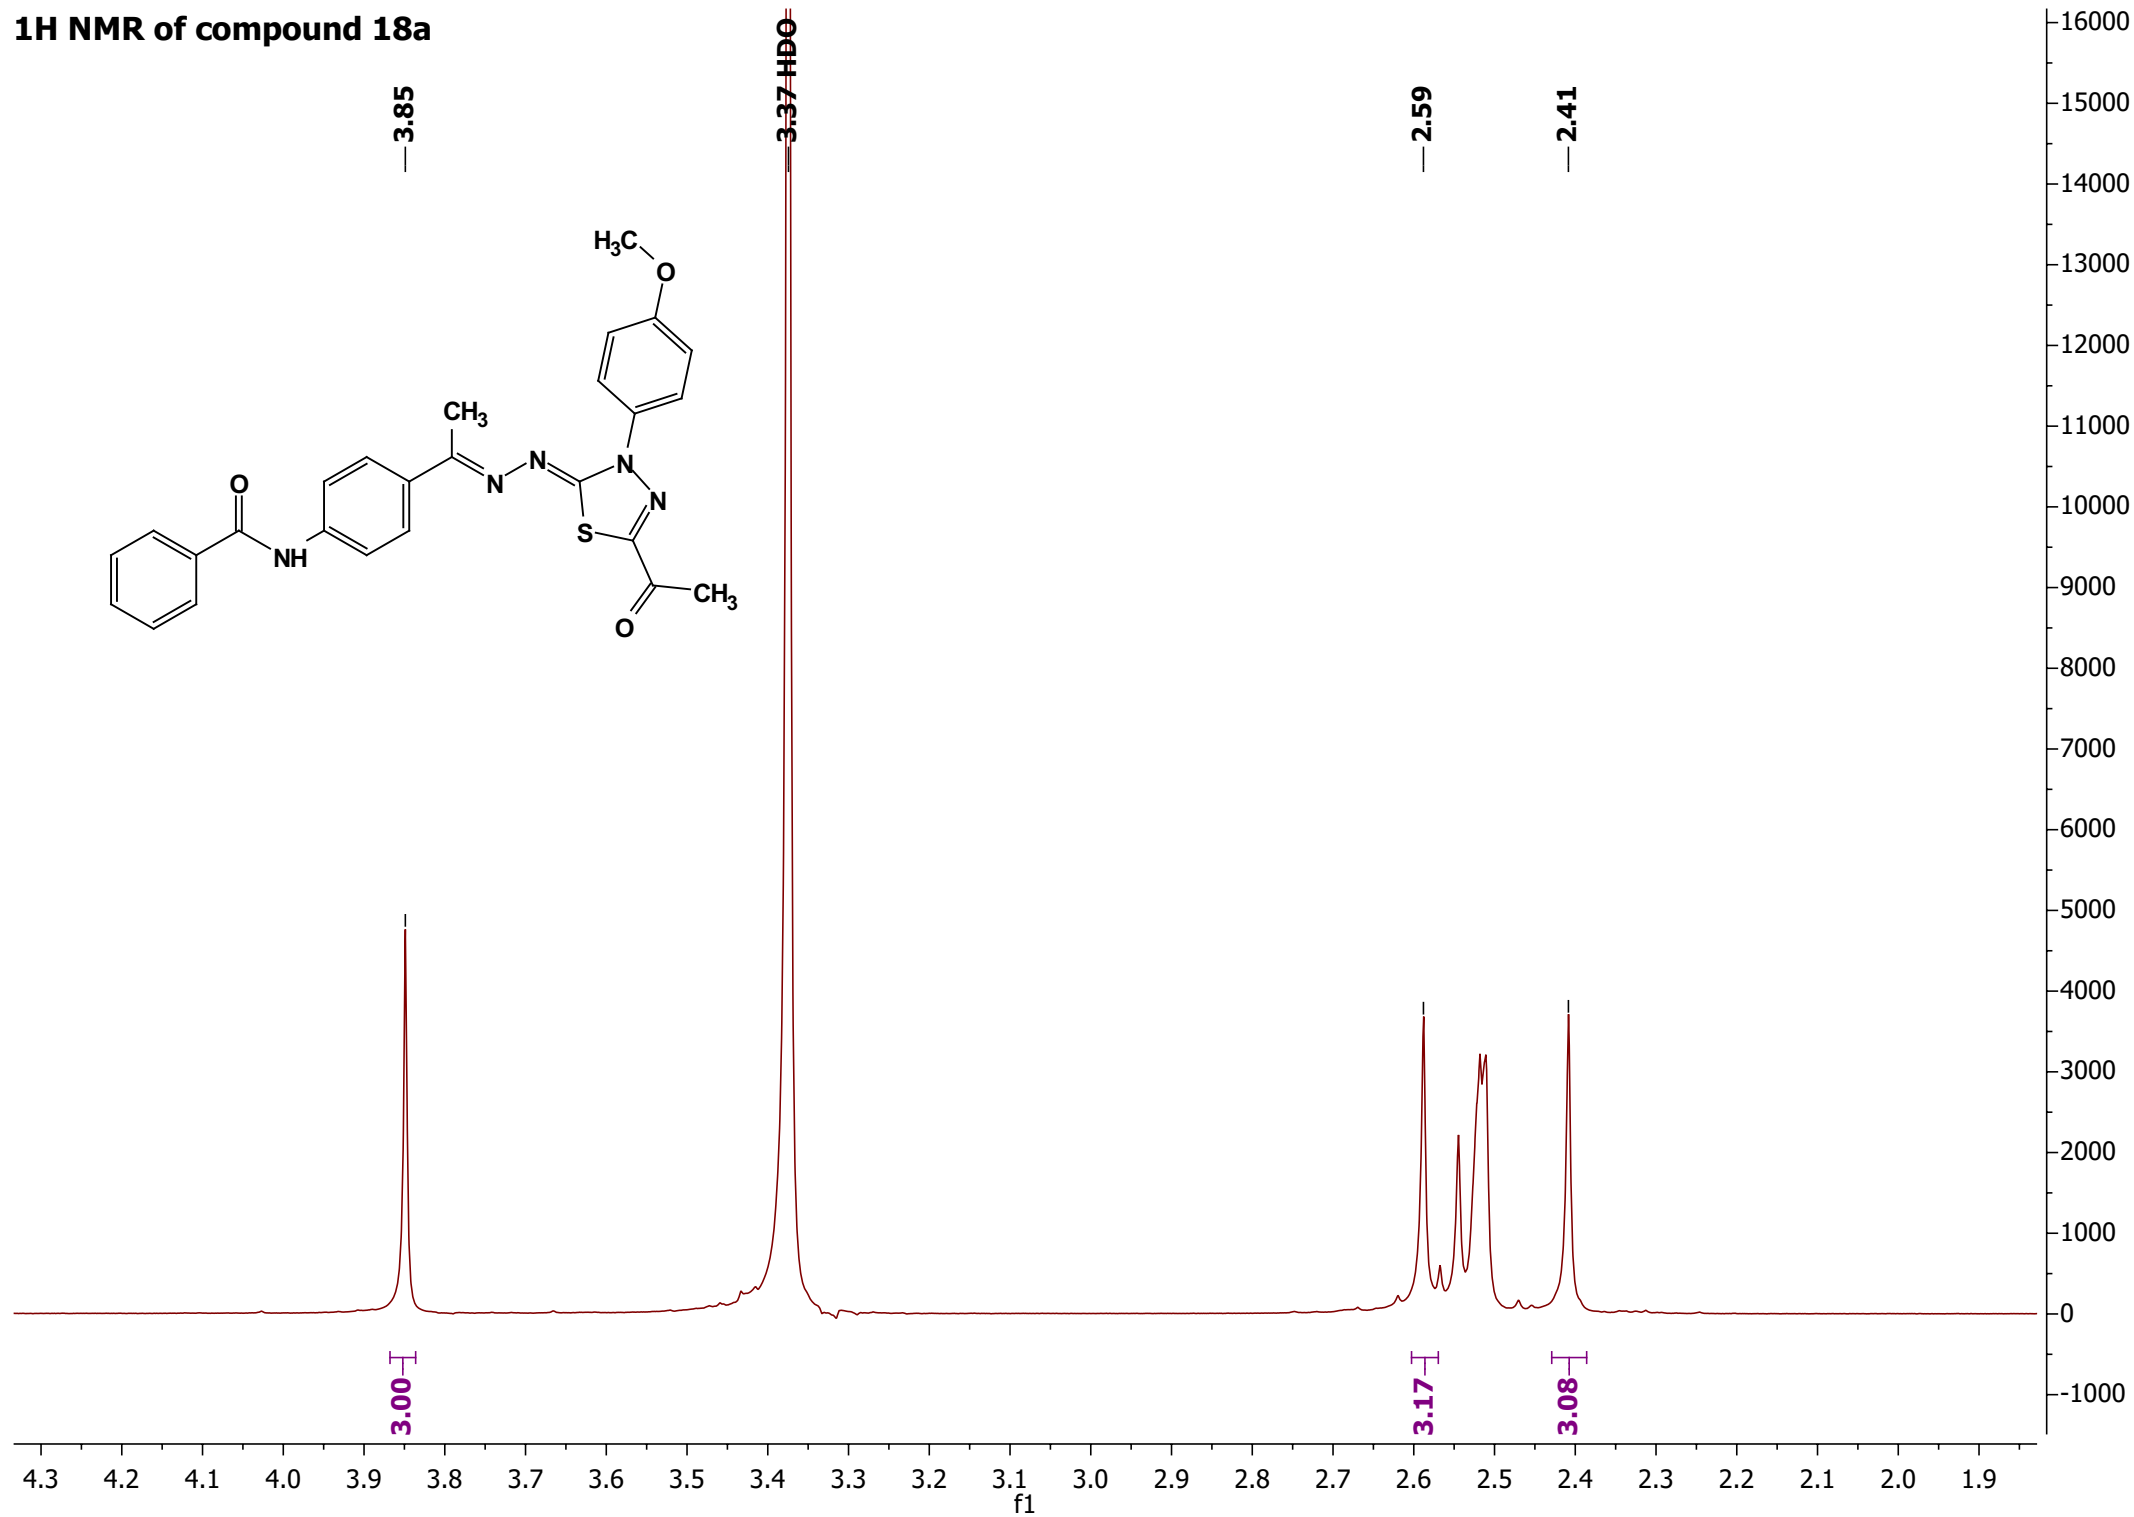

# <sup>1</sup>H NMR of compound 18a

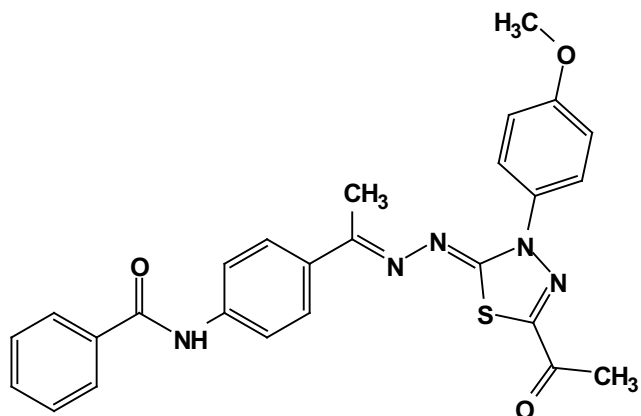

8.01  
8.01  
8.00  
8.00  
7.99  
7.99  
7.98  
7.97  
7.95  
7.94  
7.93  
7.93  
7.92  
7.90  
7.65  
7.65  
7.64  
7.63  
7.63  
7.61  
7.61  
7.61  
7.58  
7.57  
7.56  
7.55  
7.54  
7.54

7.17  
7.16  
7.15  
7.14  
7.14

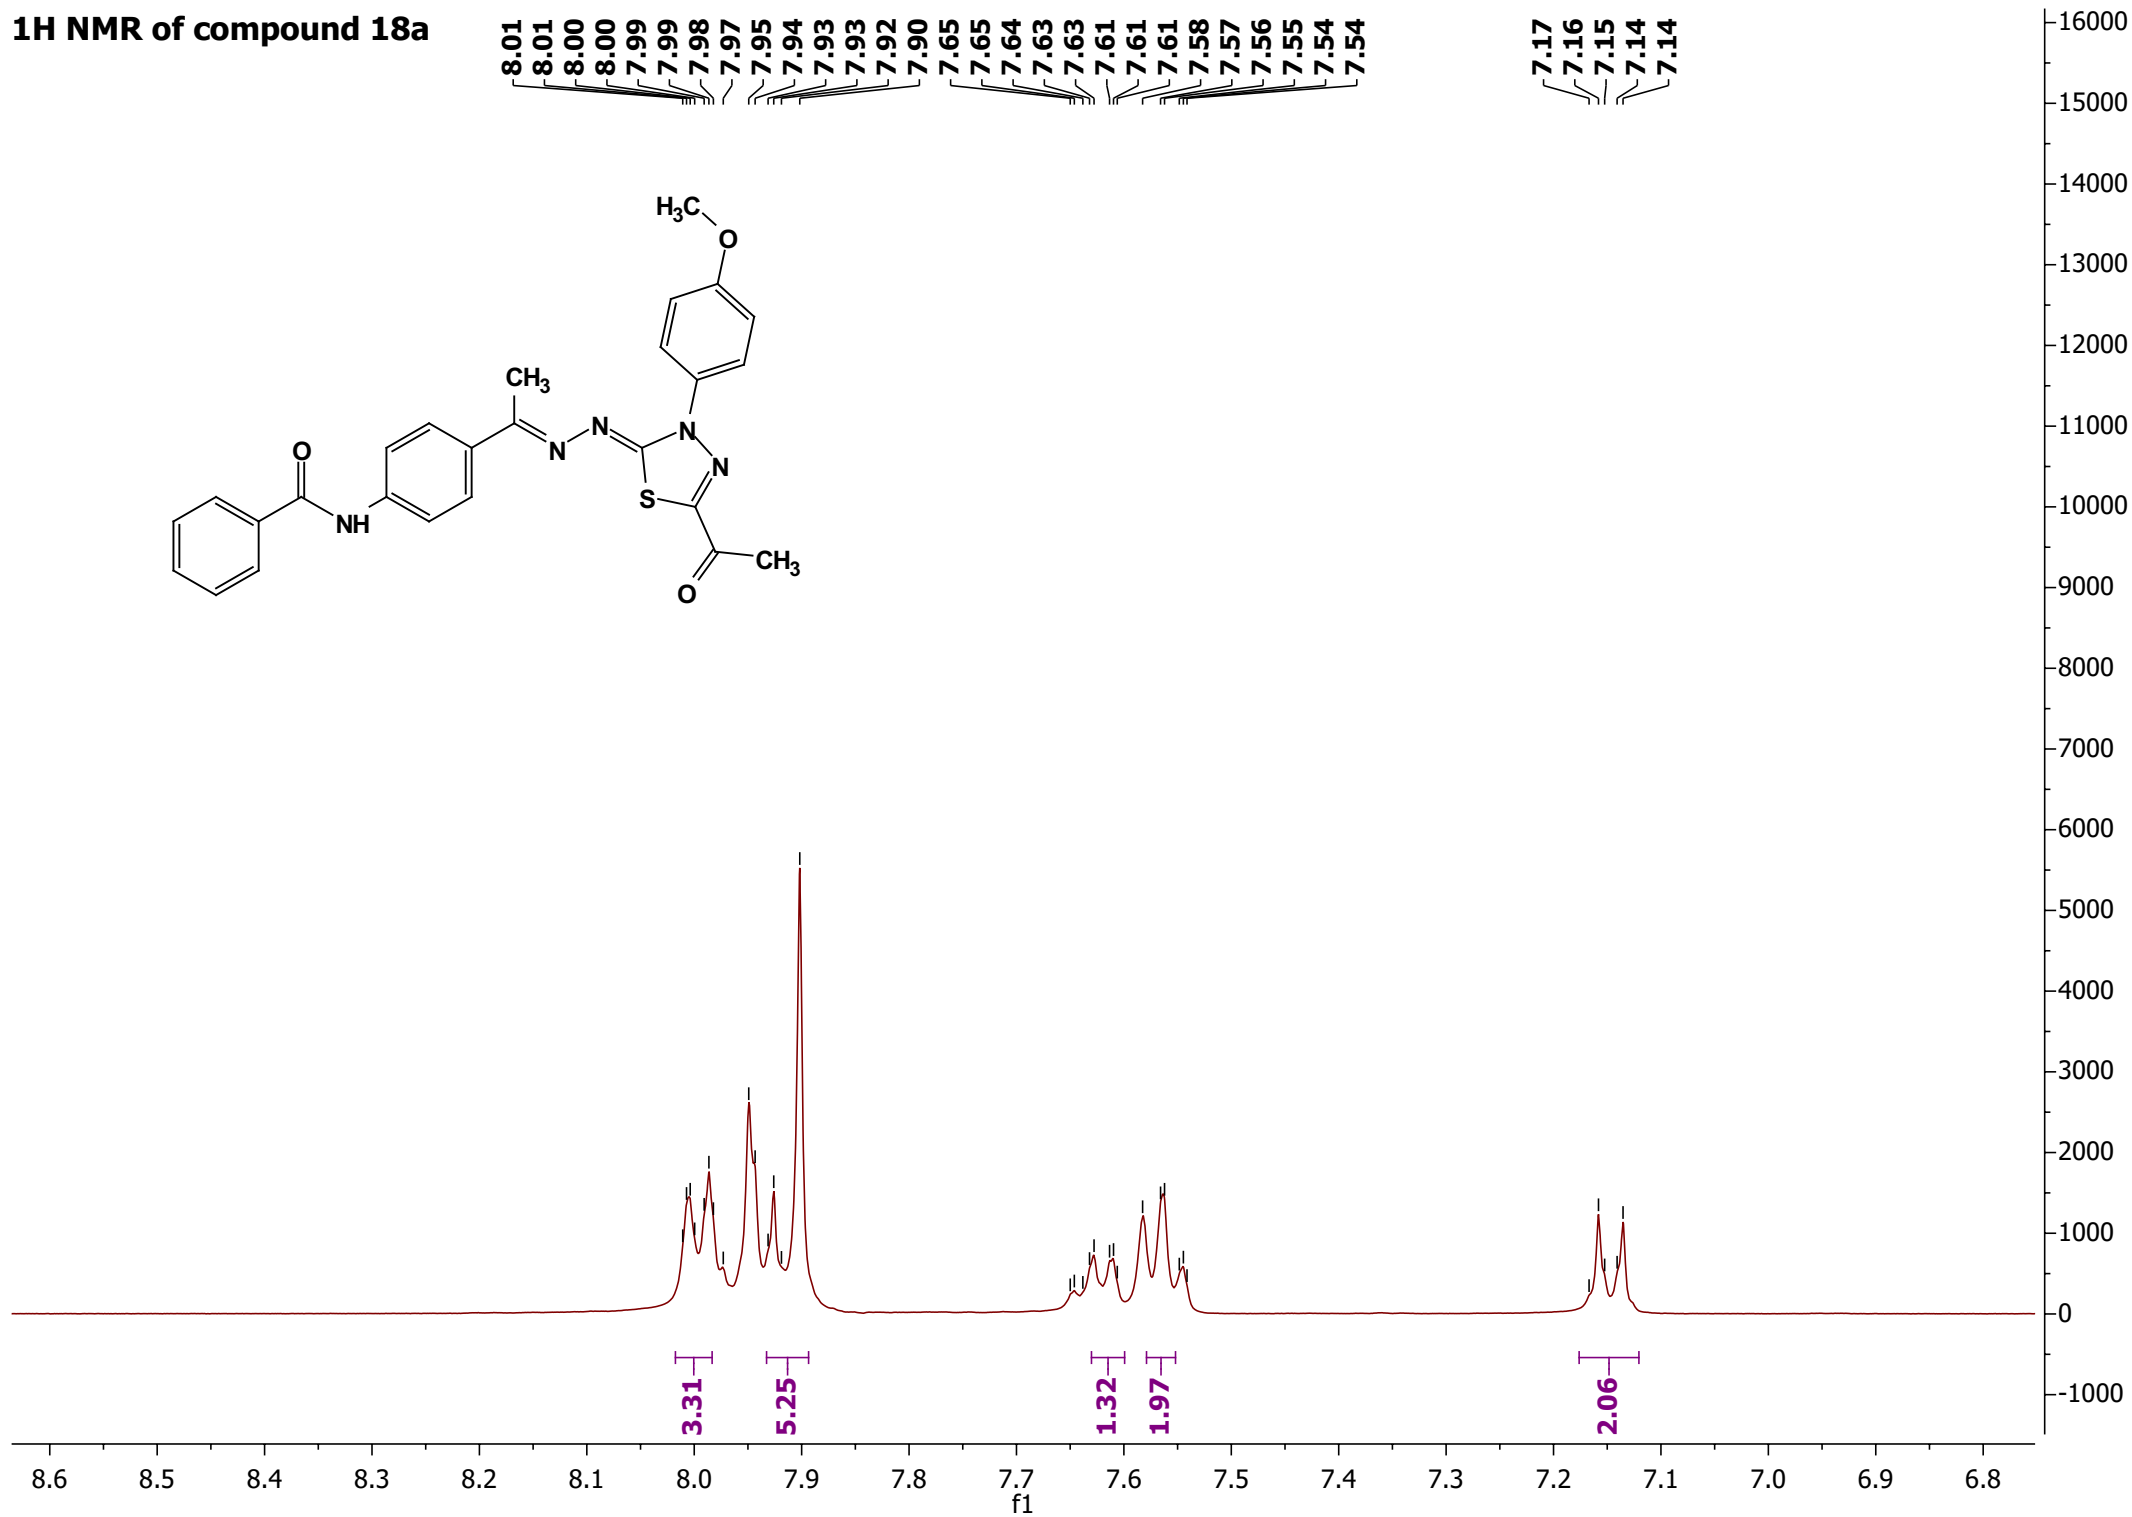

# <sup>13</sup>C NMR of compound 18a

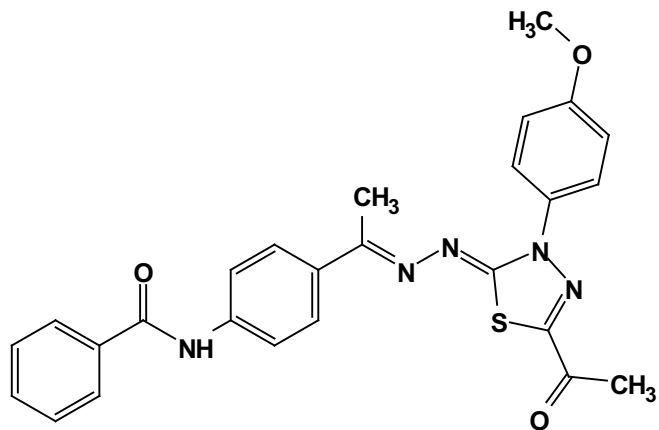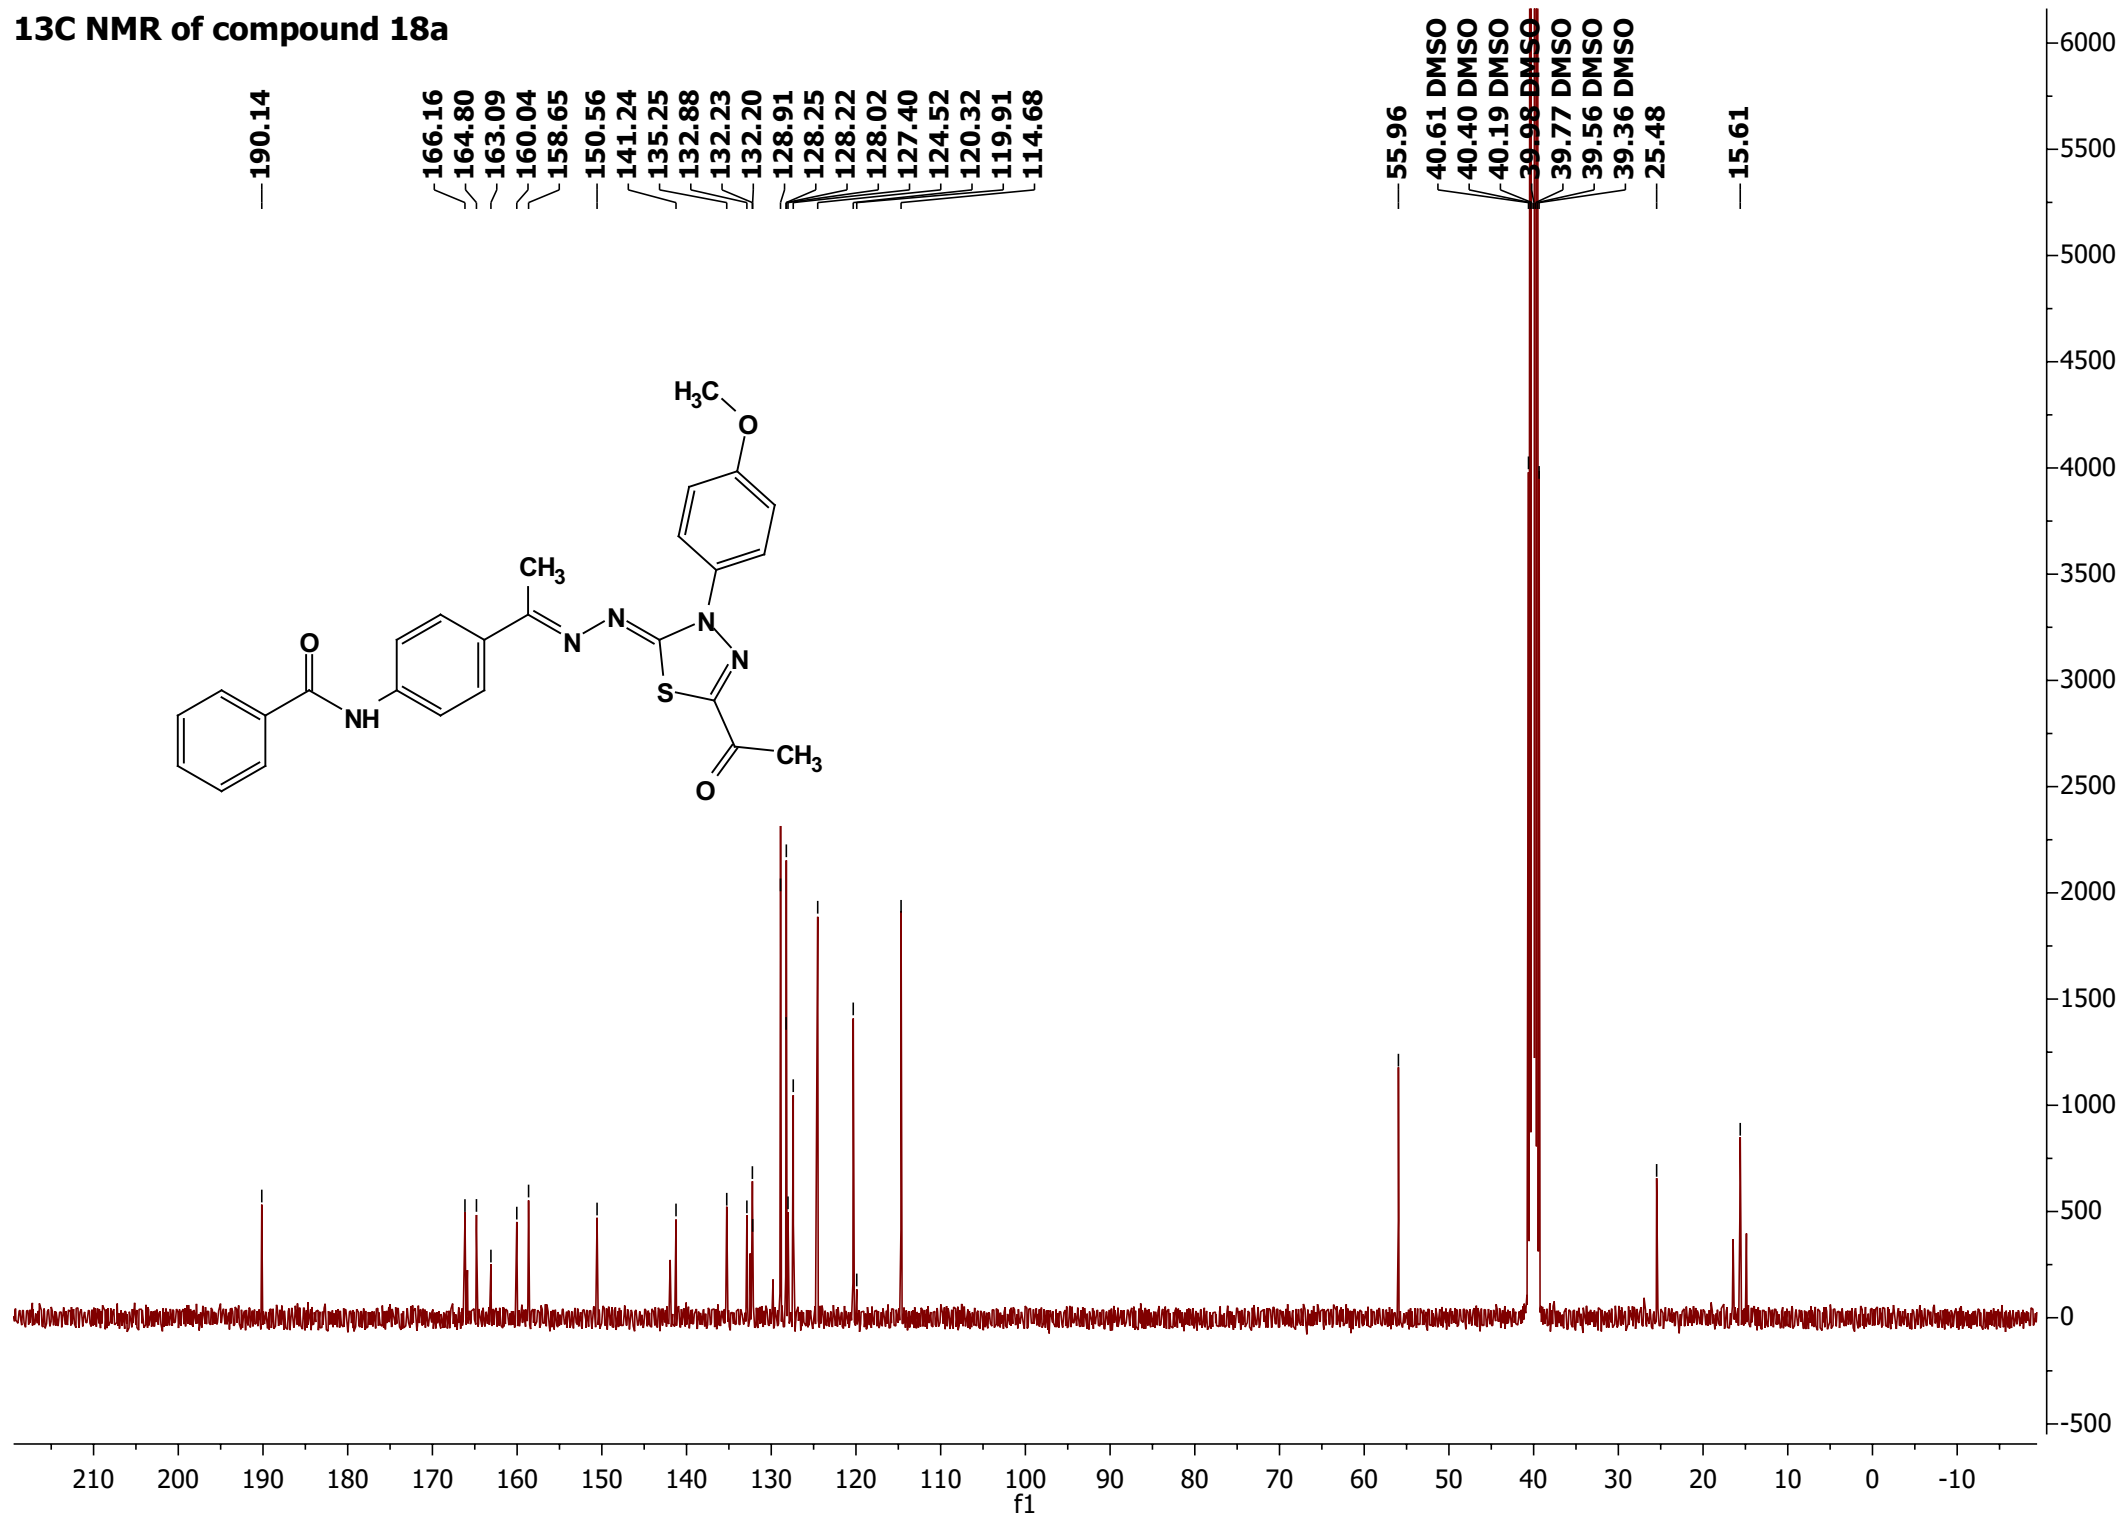

# <sup>13</sup>C NMR of compound 18a

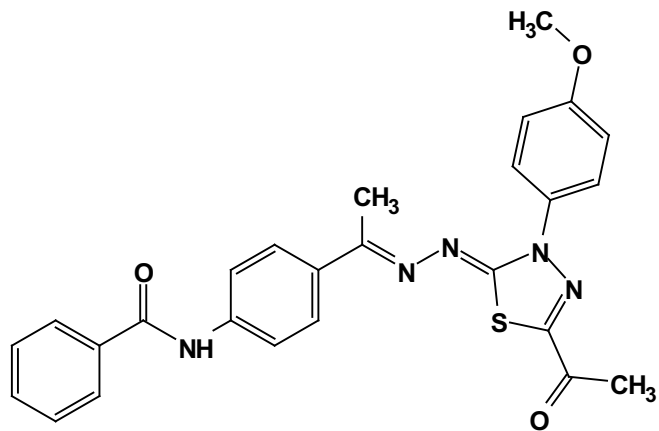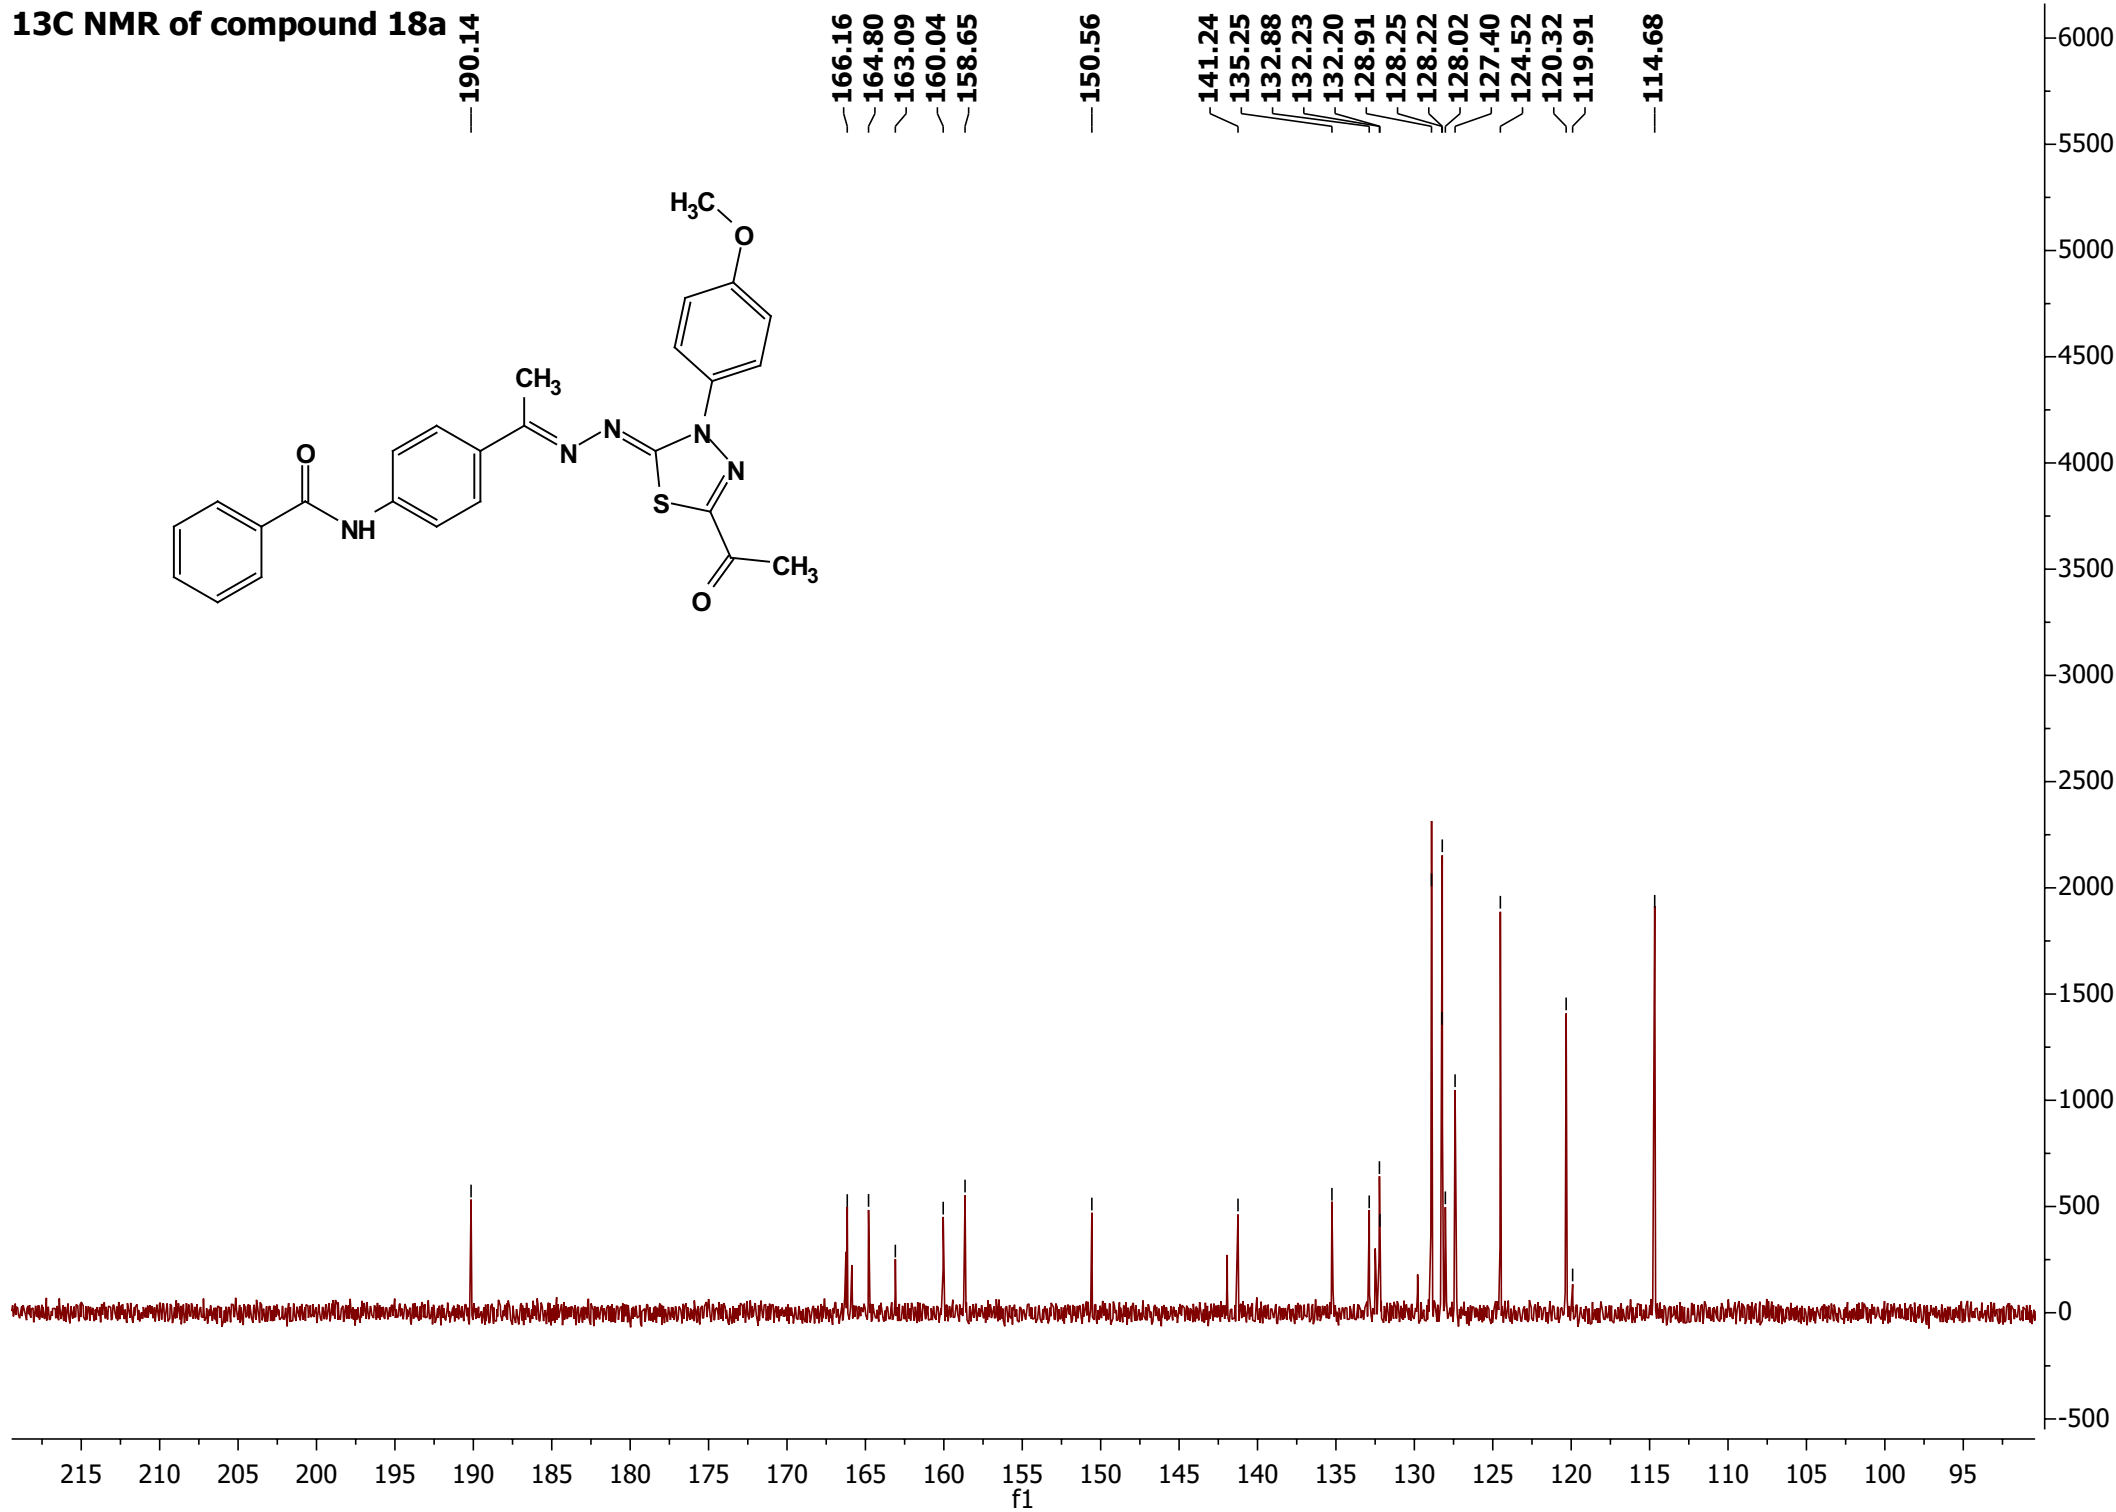

# Mass spec. of compound 18a

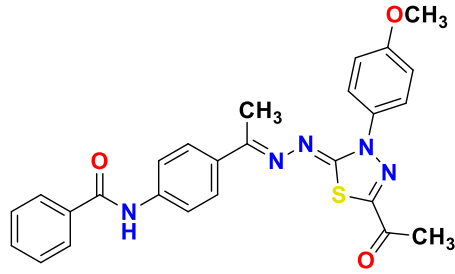

ibrahim-hassan-PH-1 #4-20 RT: 0.08-0.35 AV: 17 SB: 26 1.21-1.34 , 0.87-1.14 NL: 4.76E2  
T: {0,0} + c EI Full ms [40.00-1000.00]

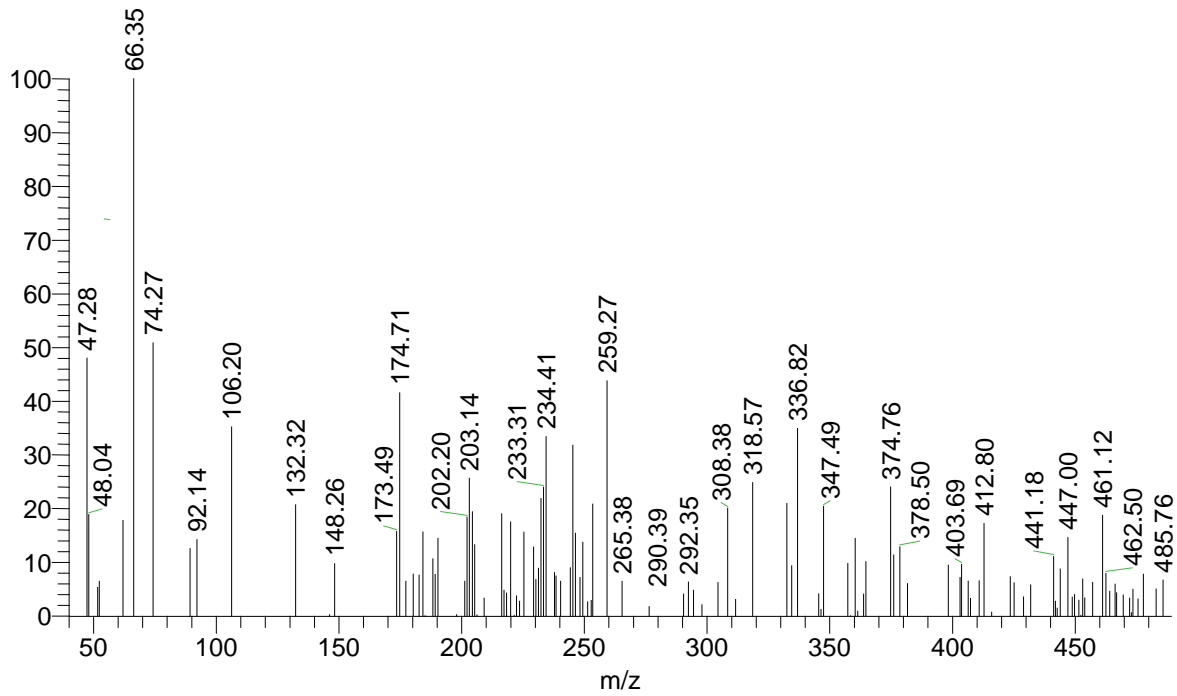

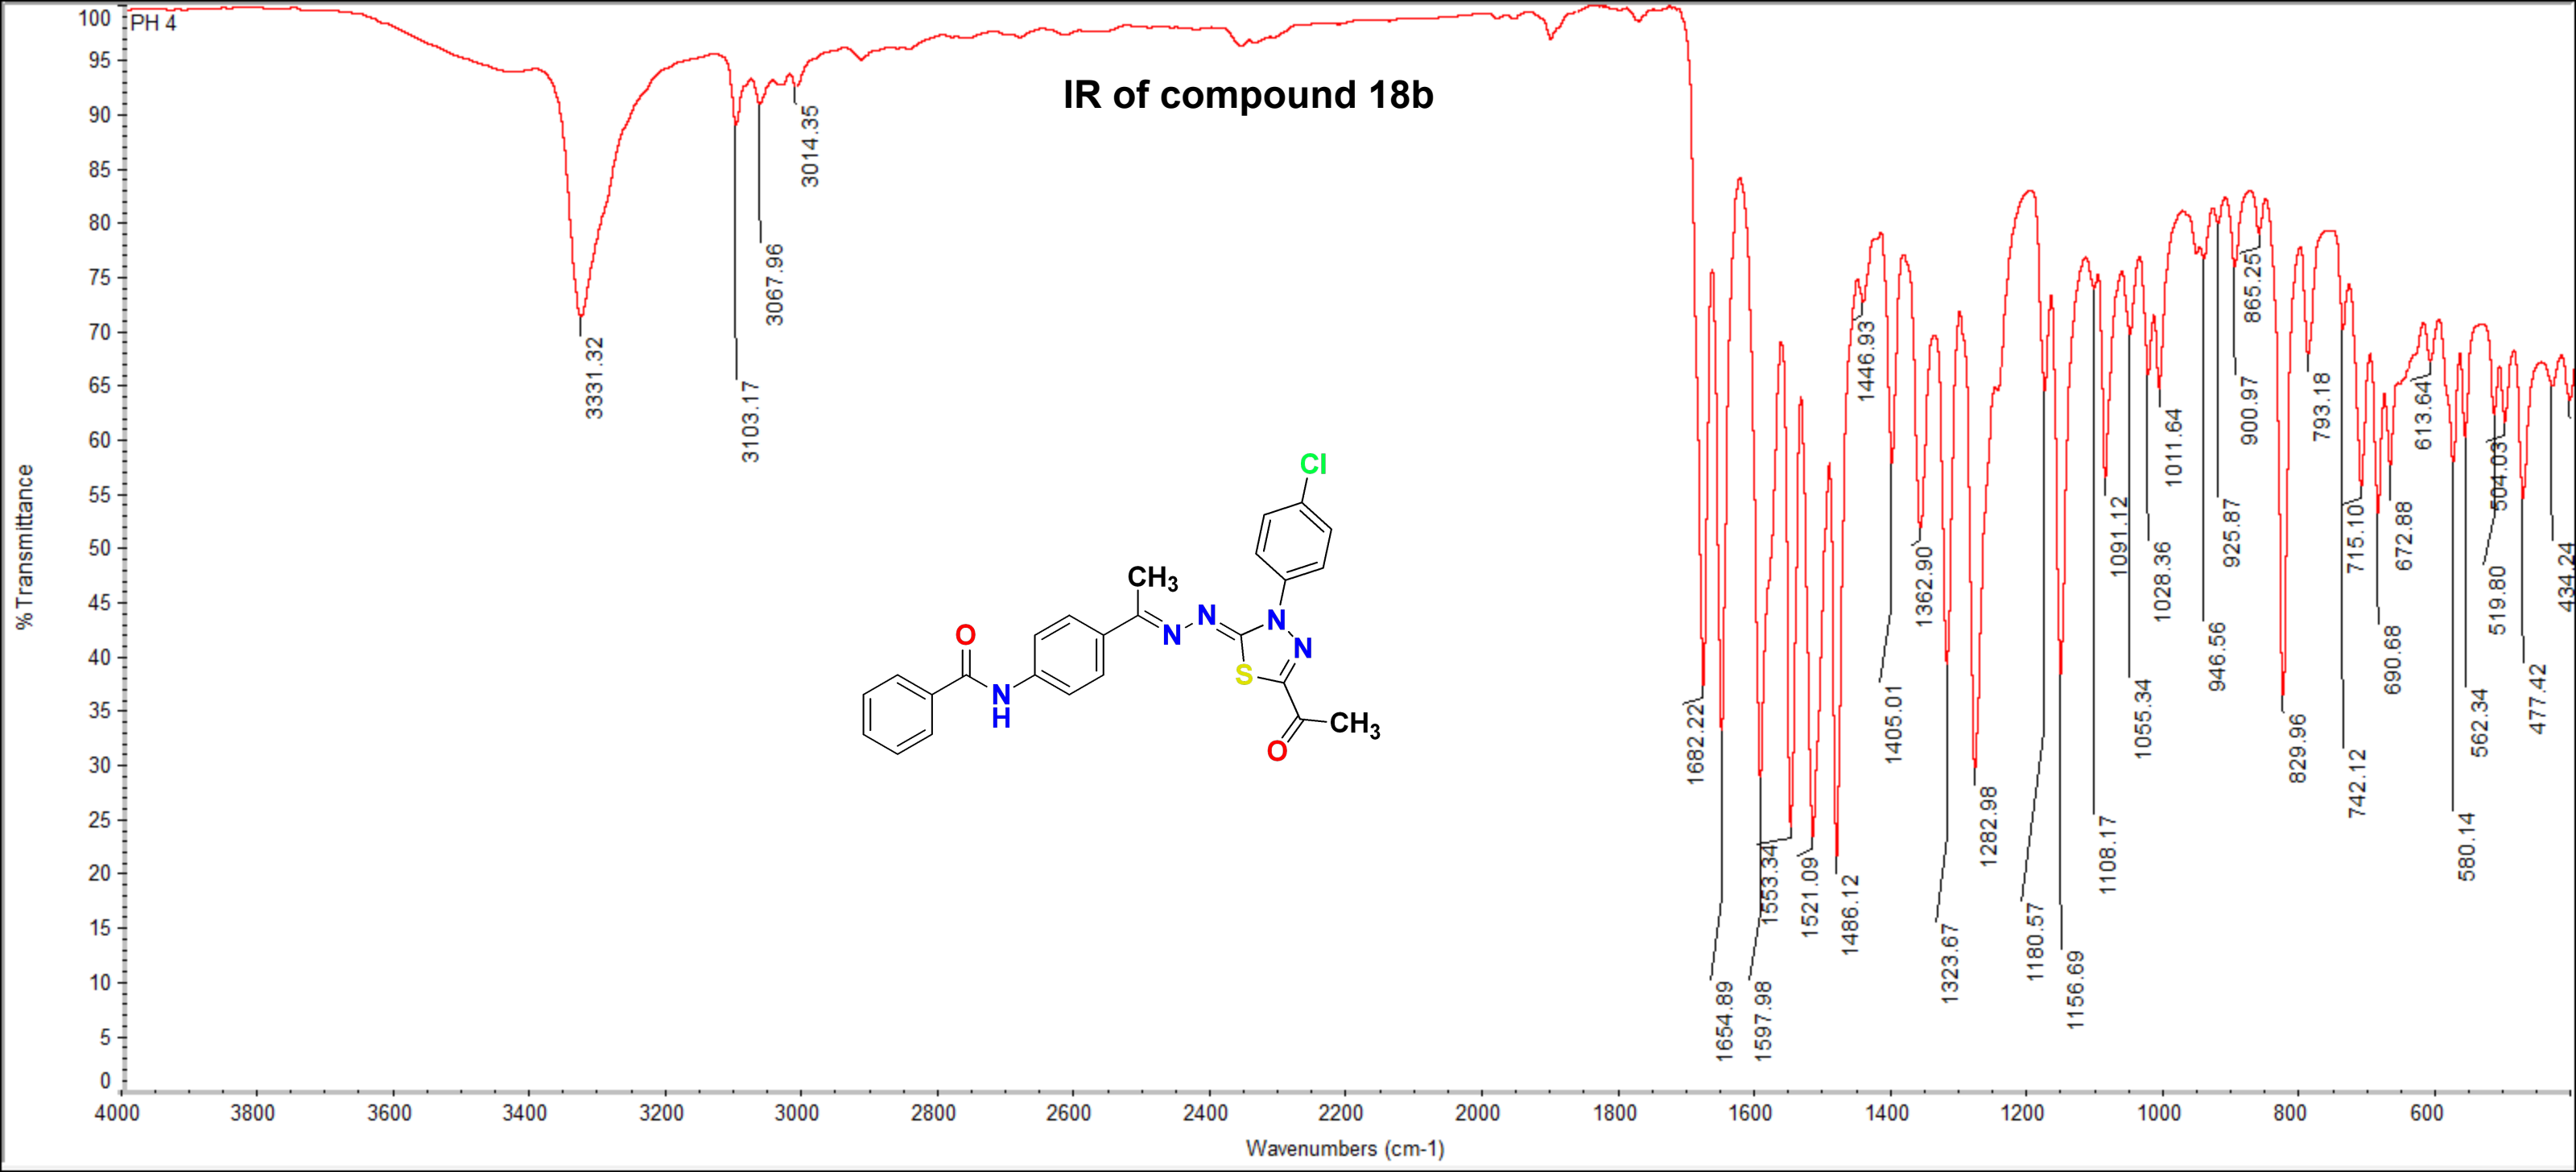



# 1H NMR of compound 18b

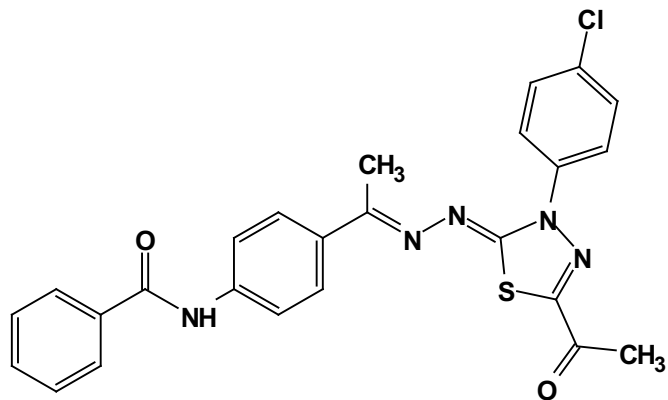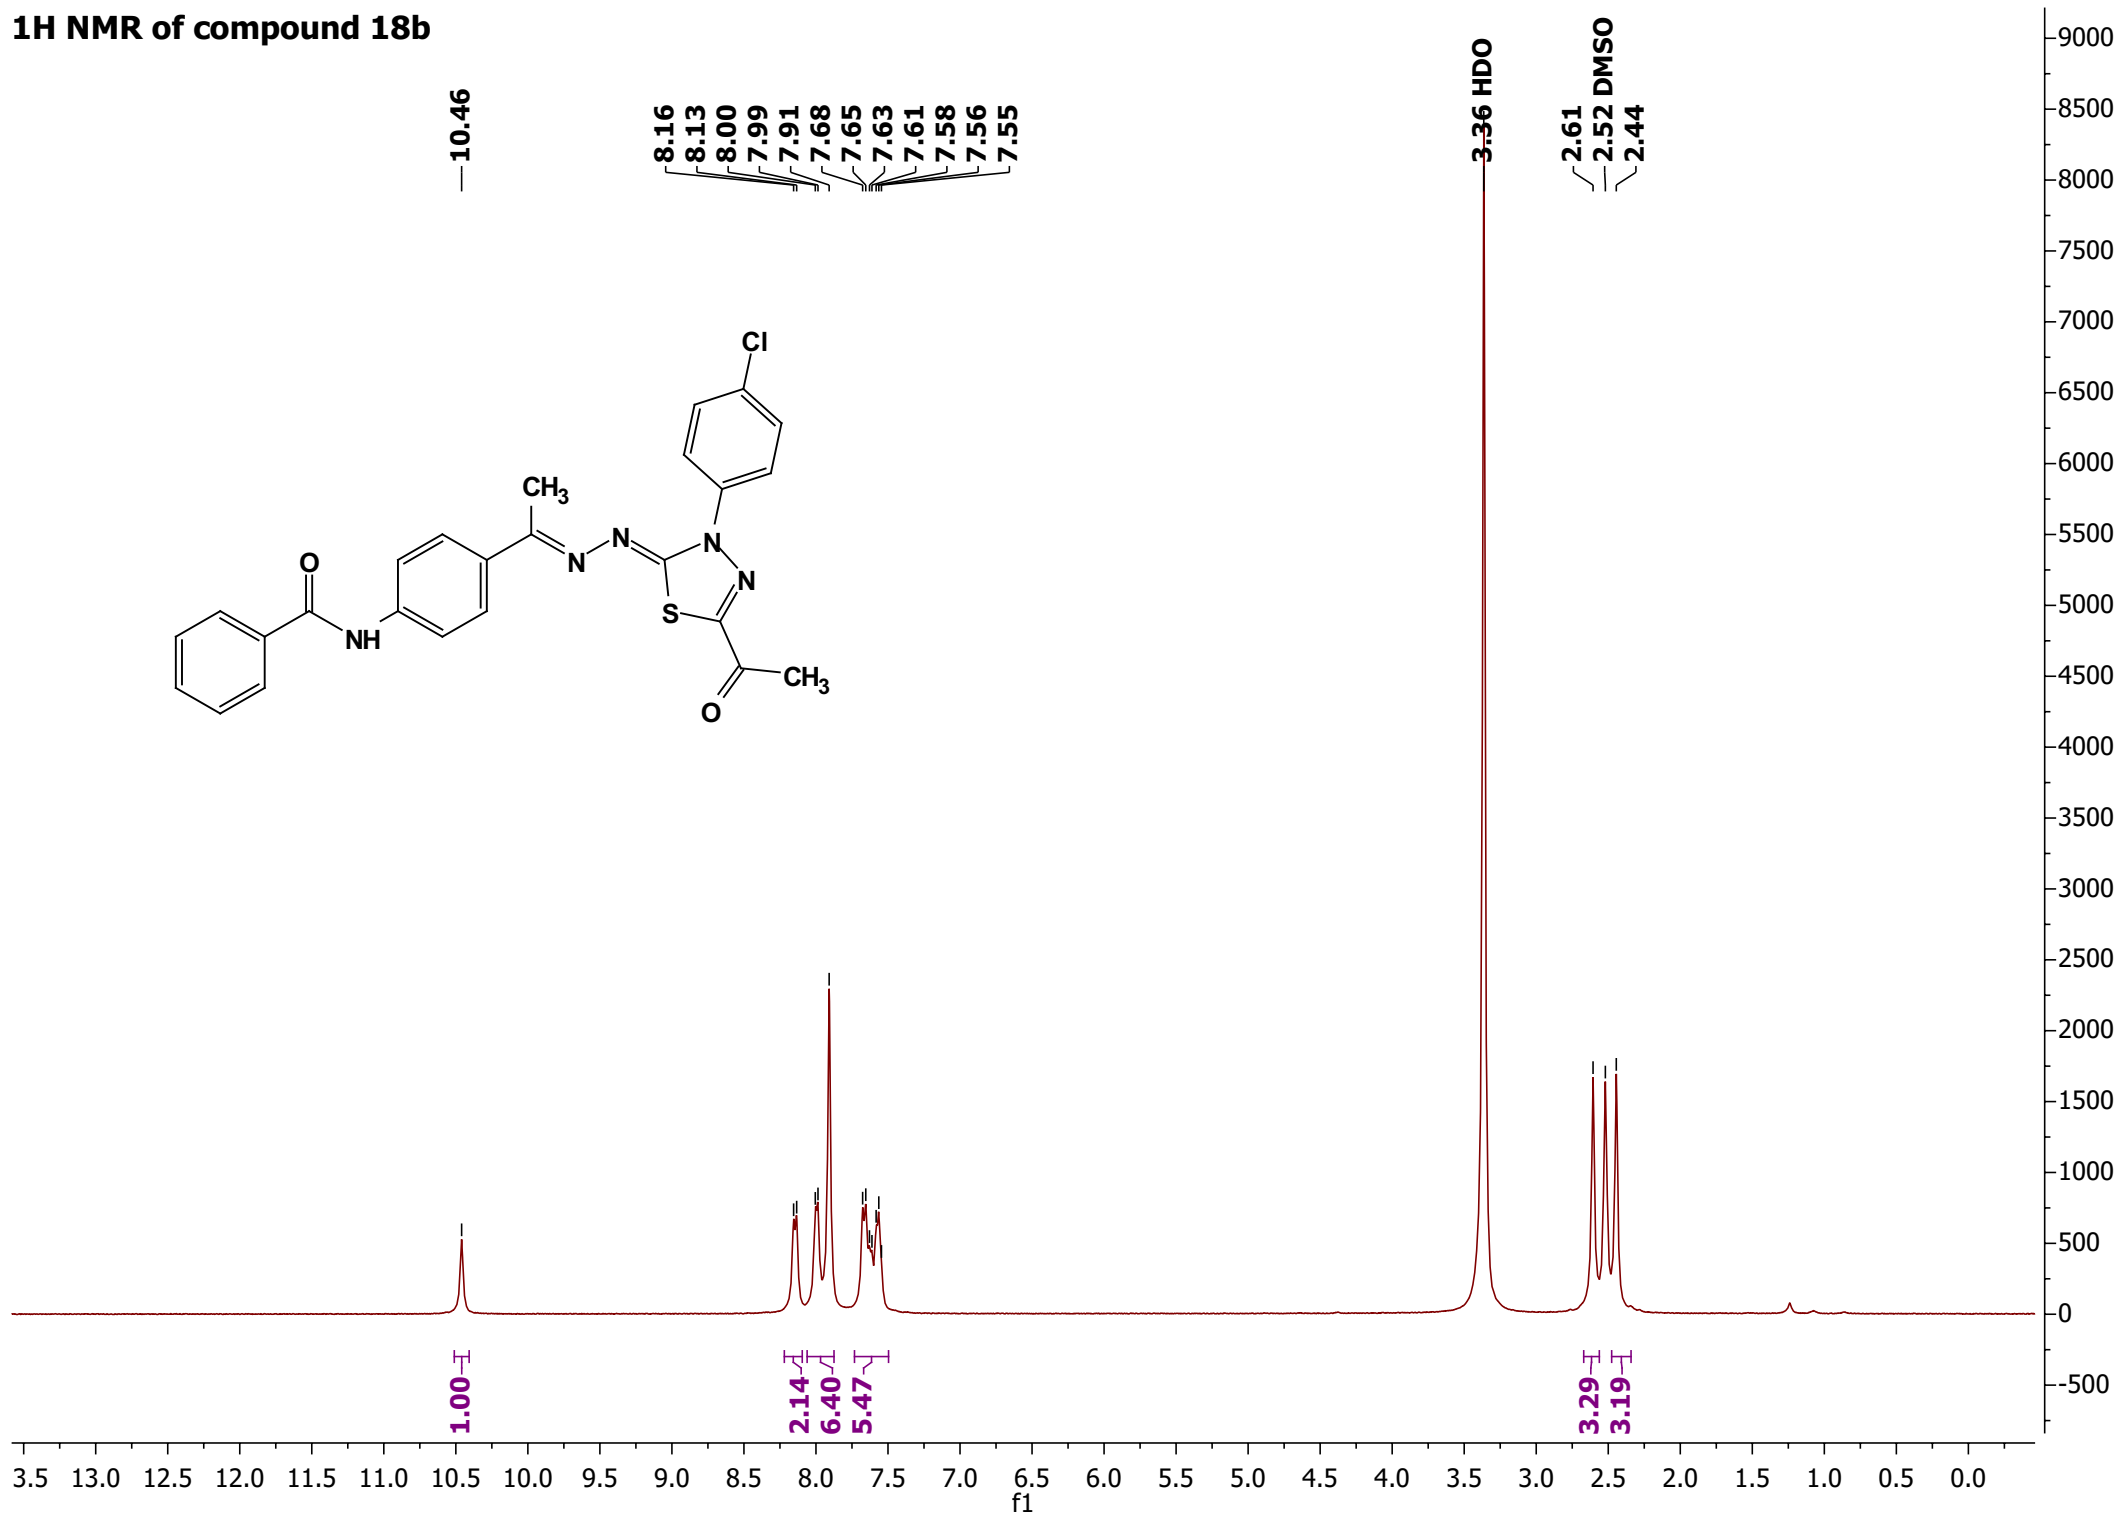

# **<sup>1</sup>H NMR of compound 18b**

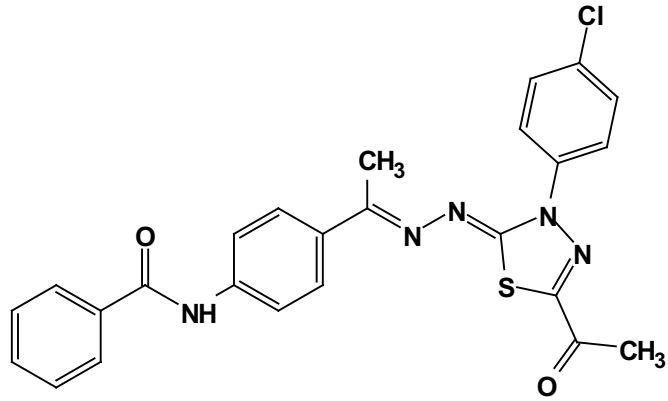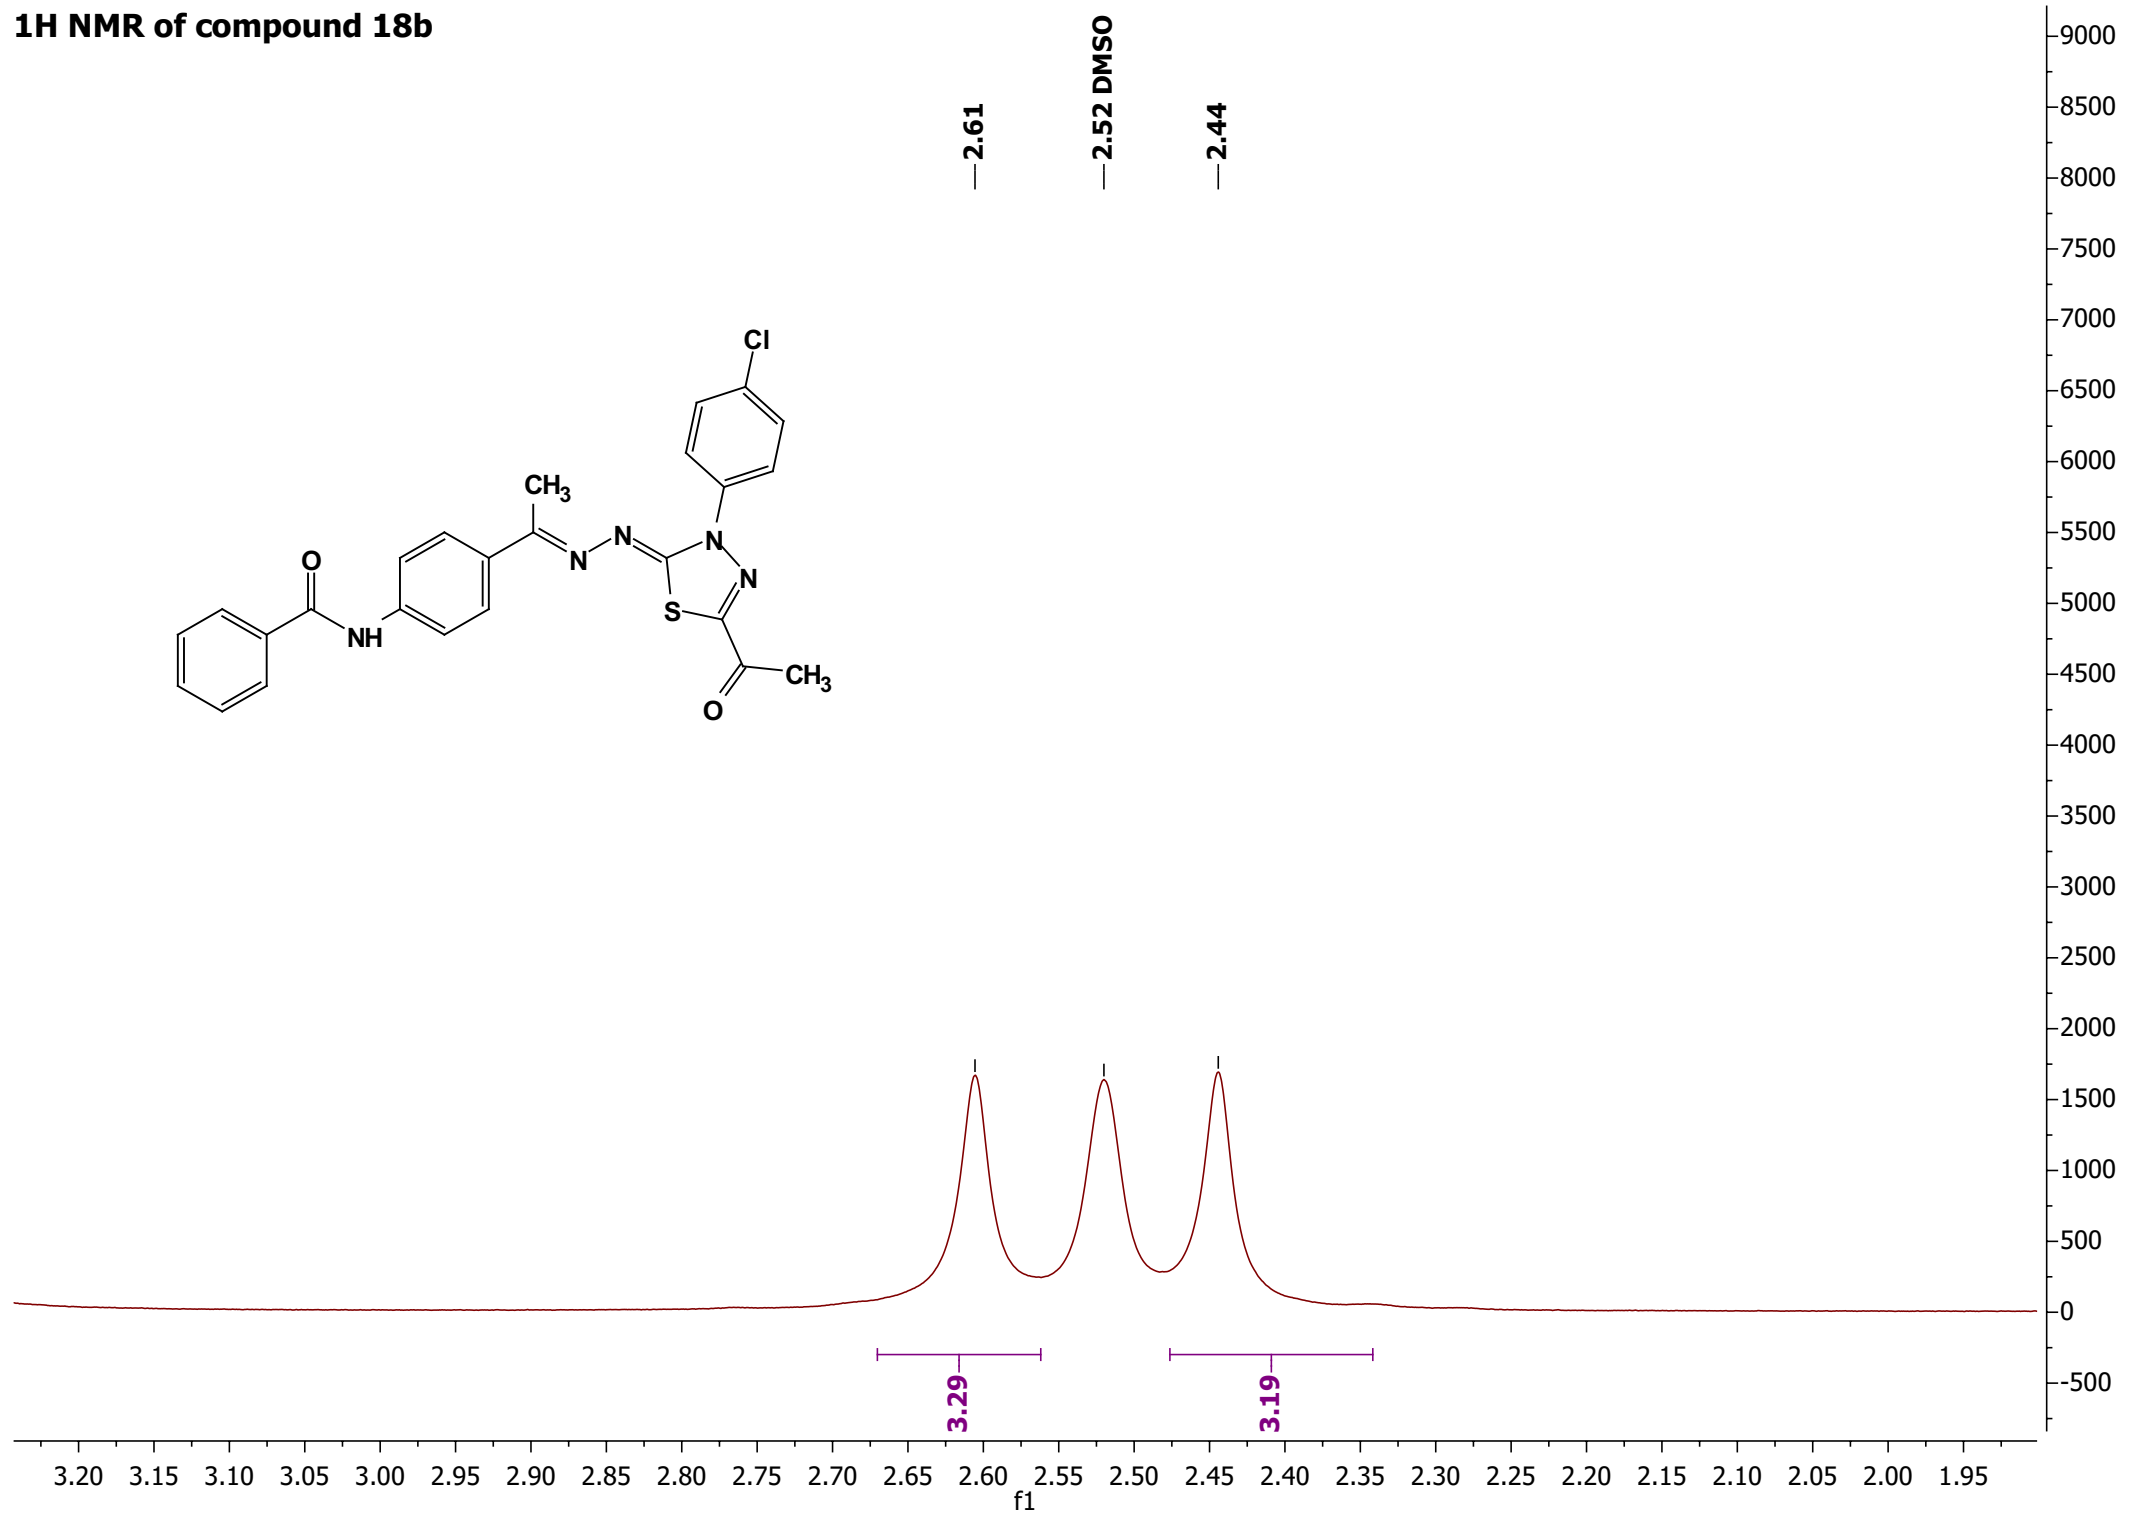

# <sup>1</sup>H NMR of compound 18b

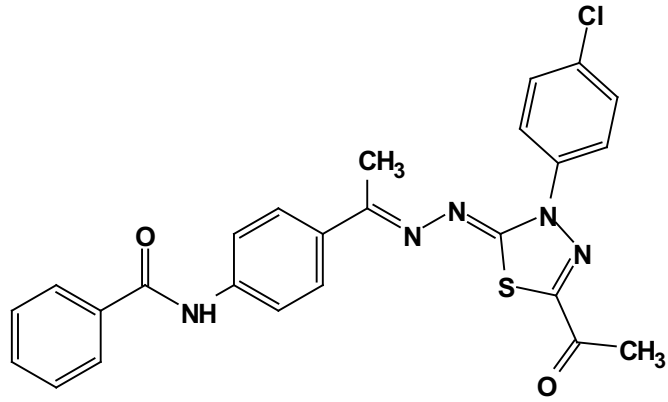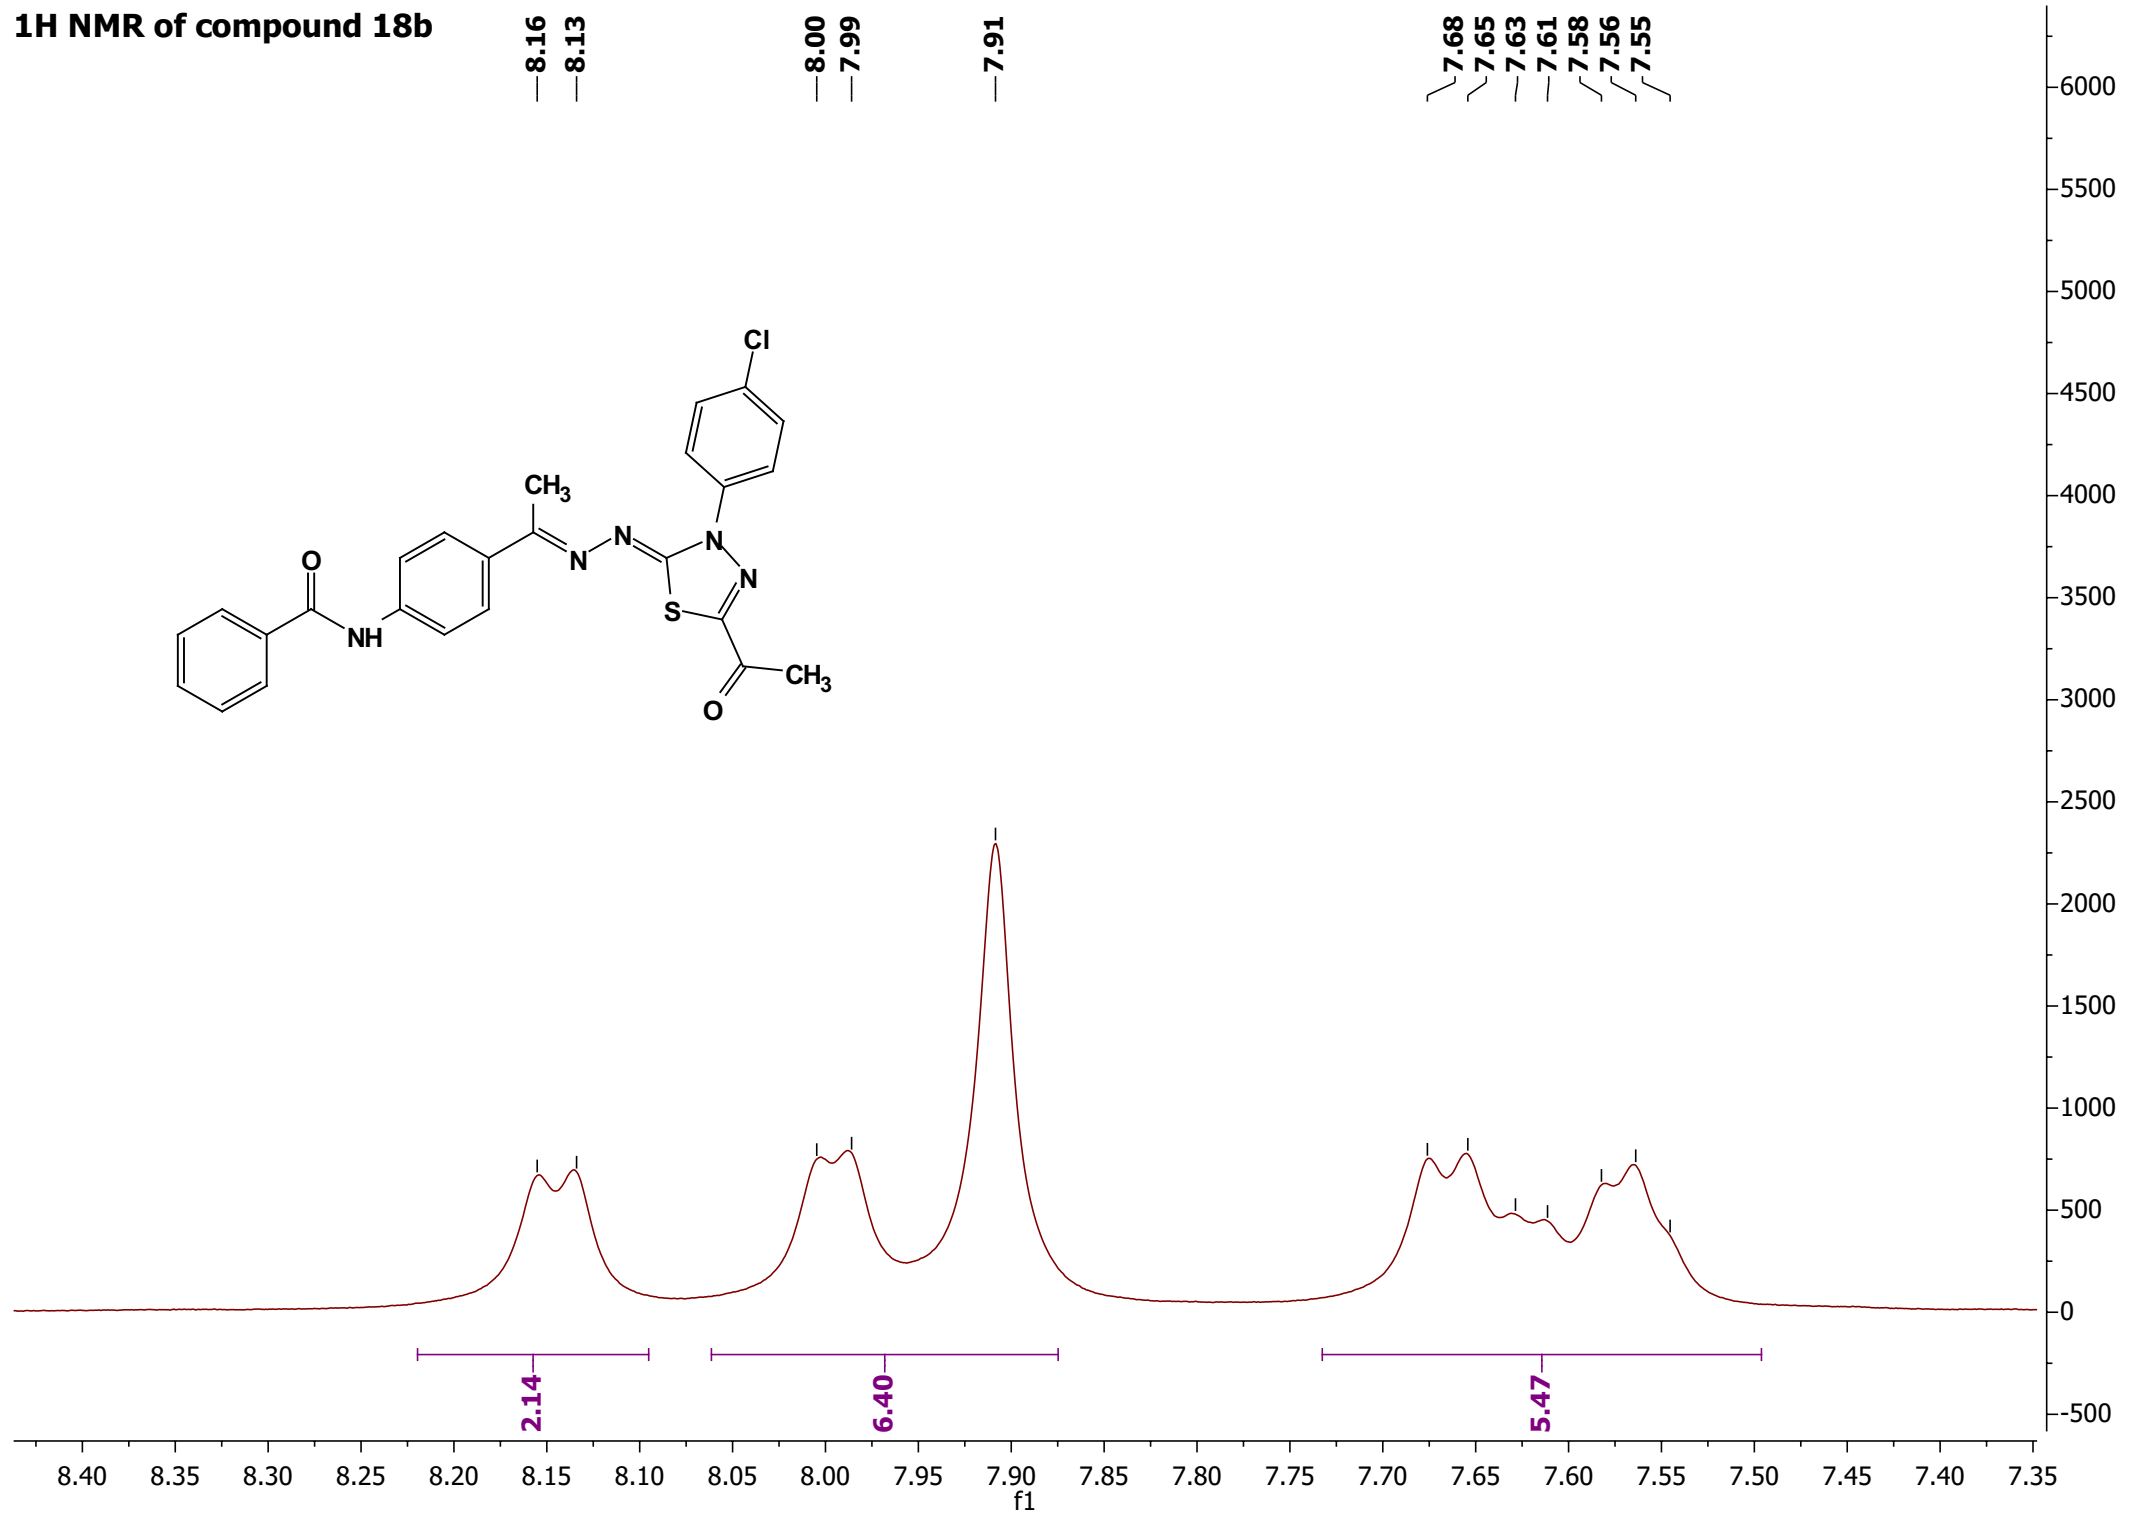

# <sup>13</sup>C NMR of compound 18b

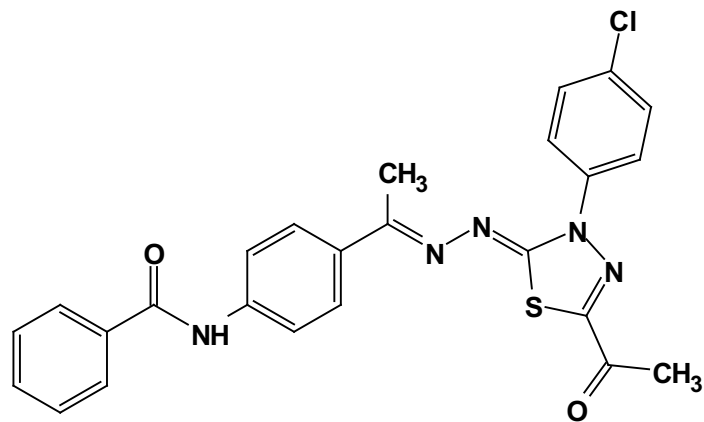

190.24

166.17

164.32

160.79

151.46

141.40

138.14

135.25

132.68

132.21

131.48

129.59

128.90

128.23

127.52

123.82

120.30

40.62 DMSO

40.41 DMSO

40.20 DMSO

39.99 DMSO

39.78 DMSO

39.58 DMSO

39.37 DMSO

25.53

15.81

210 200 190 180 170 160 150 140 130 120 110 100 90 80 70 60 50 40 30 20 10 0 -10

f1

6500  
6000  
5500  
5000  
4500  
4000  
3500  
3000  
2500  
2000  
1500  
1000  
500  
0  
-500

# <sup>13</sup>C NMR of compound 18b

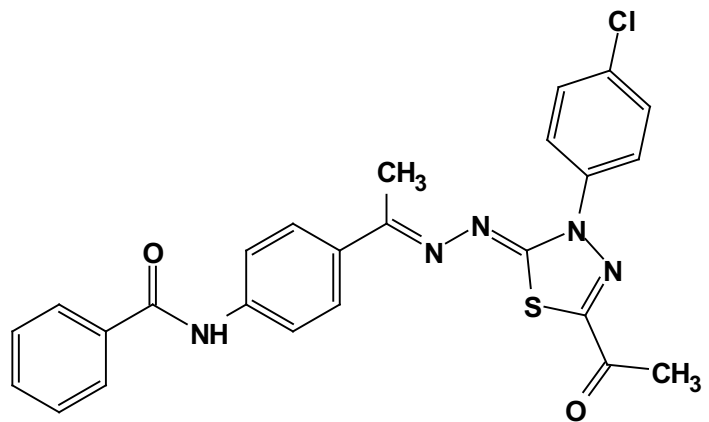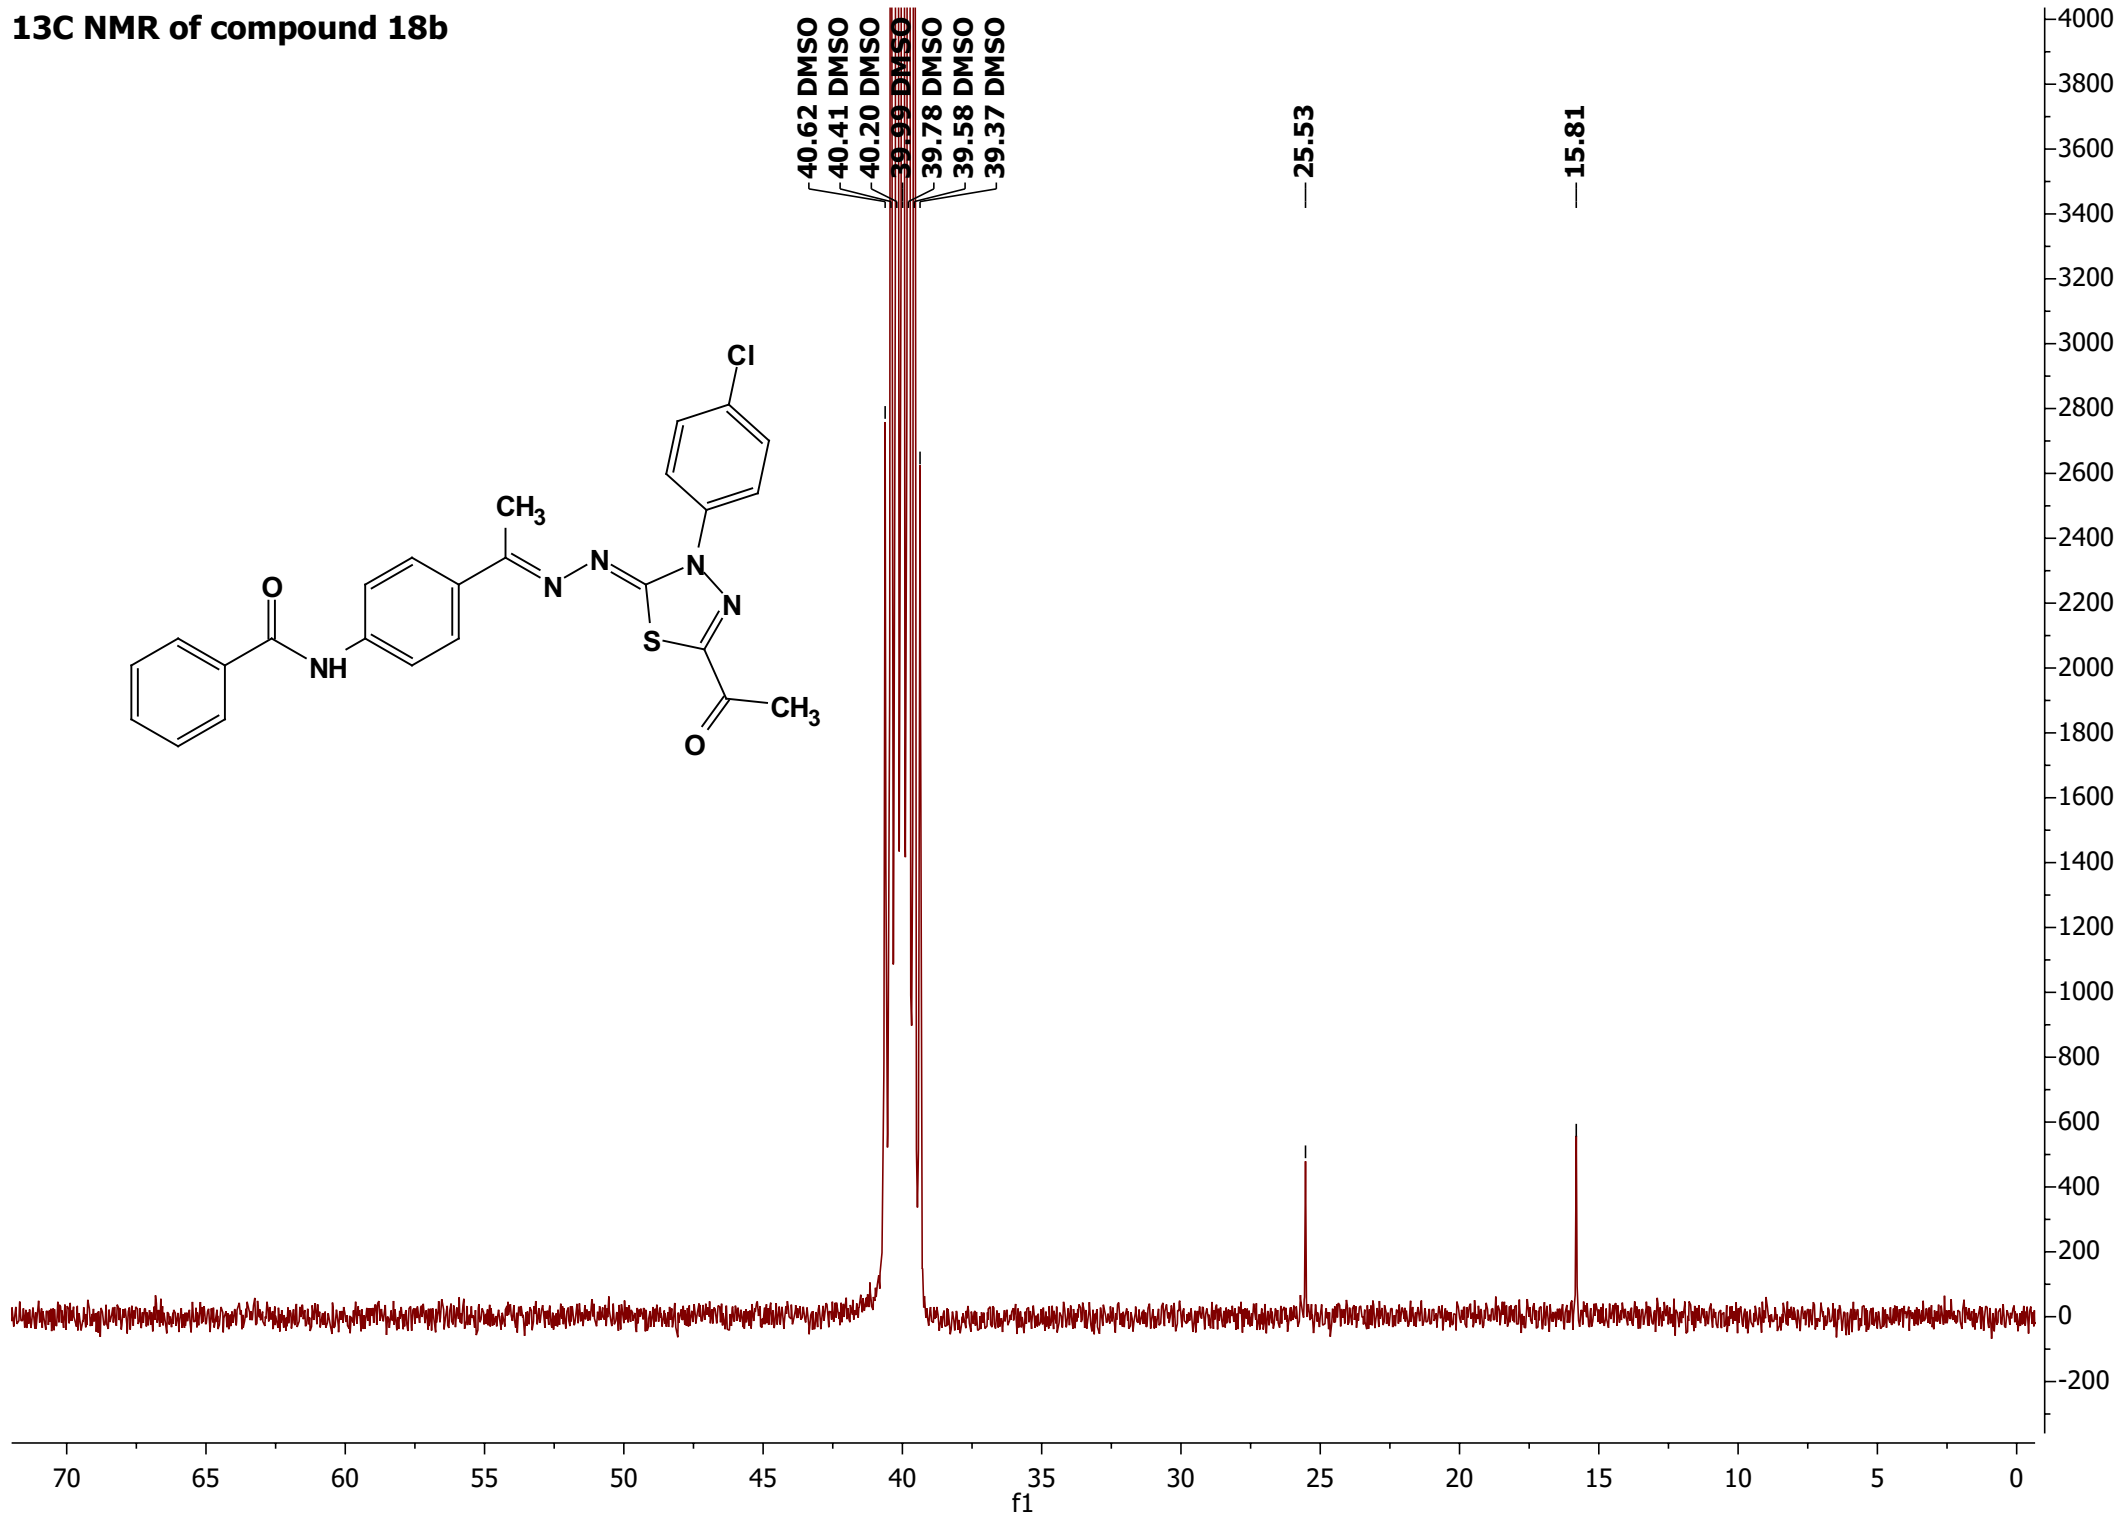

# <sup>13</sup>C NMR of compound 18b

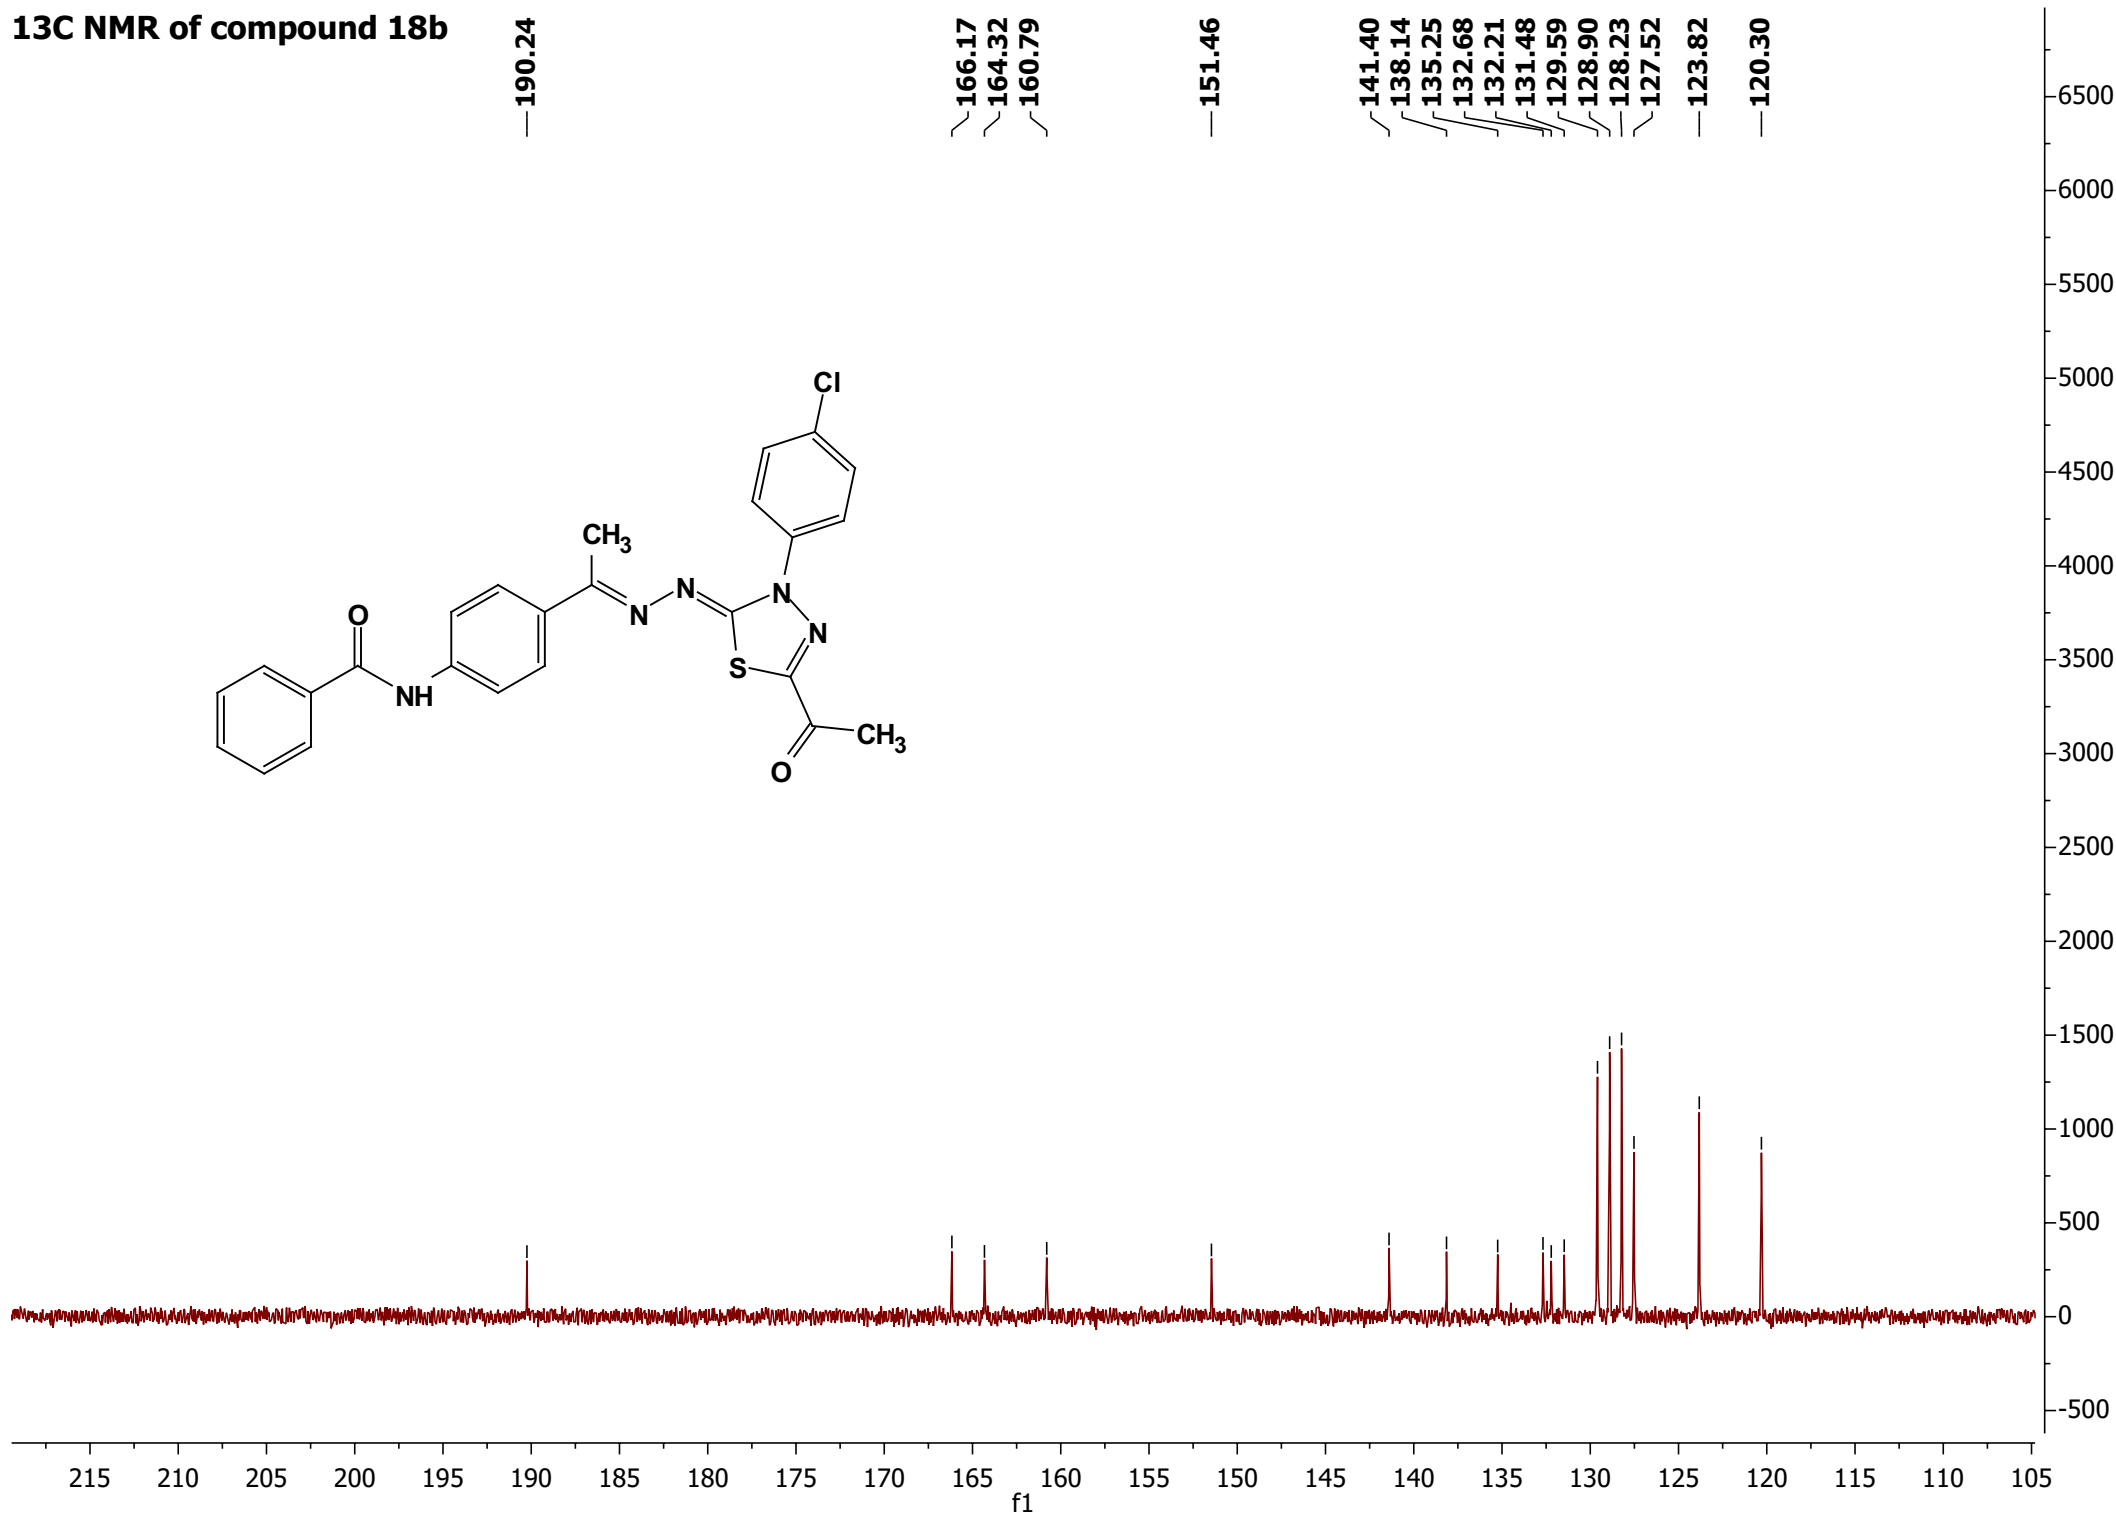

# Mass spec. of compound 18b

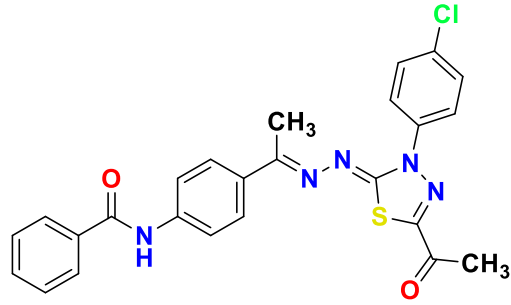

ibrahim-hassan-ph4 #87 RT: 1.47 AV: 1 SB: 26 1.21-1.34 , 0.87-1.14 NL: 3.38E3  
T: {0,0} + c EI Full ms [40.00-1000.00]

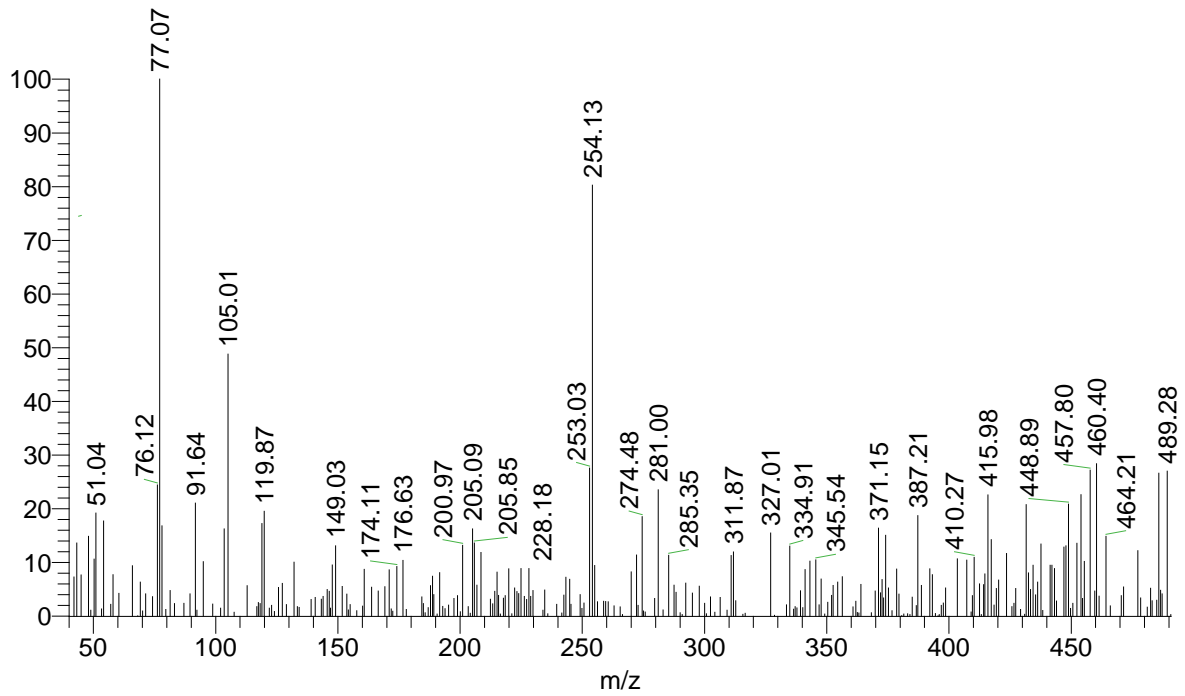

# IR of compound 18c

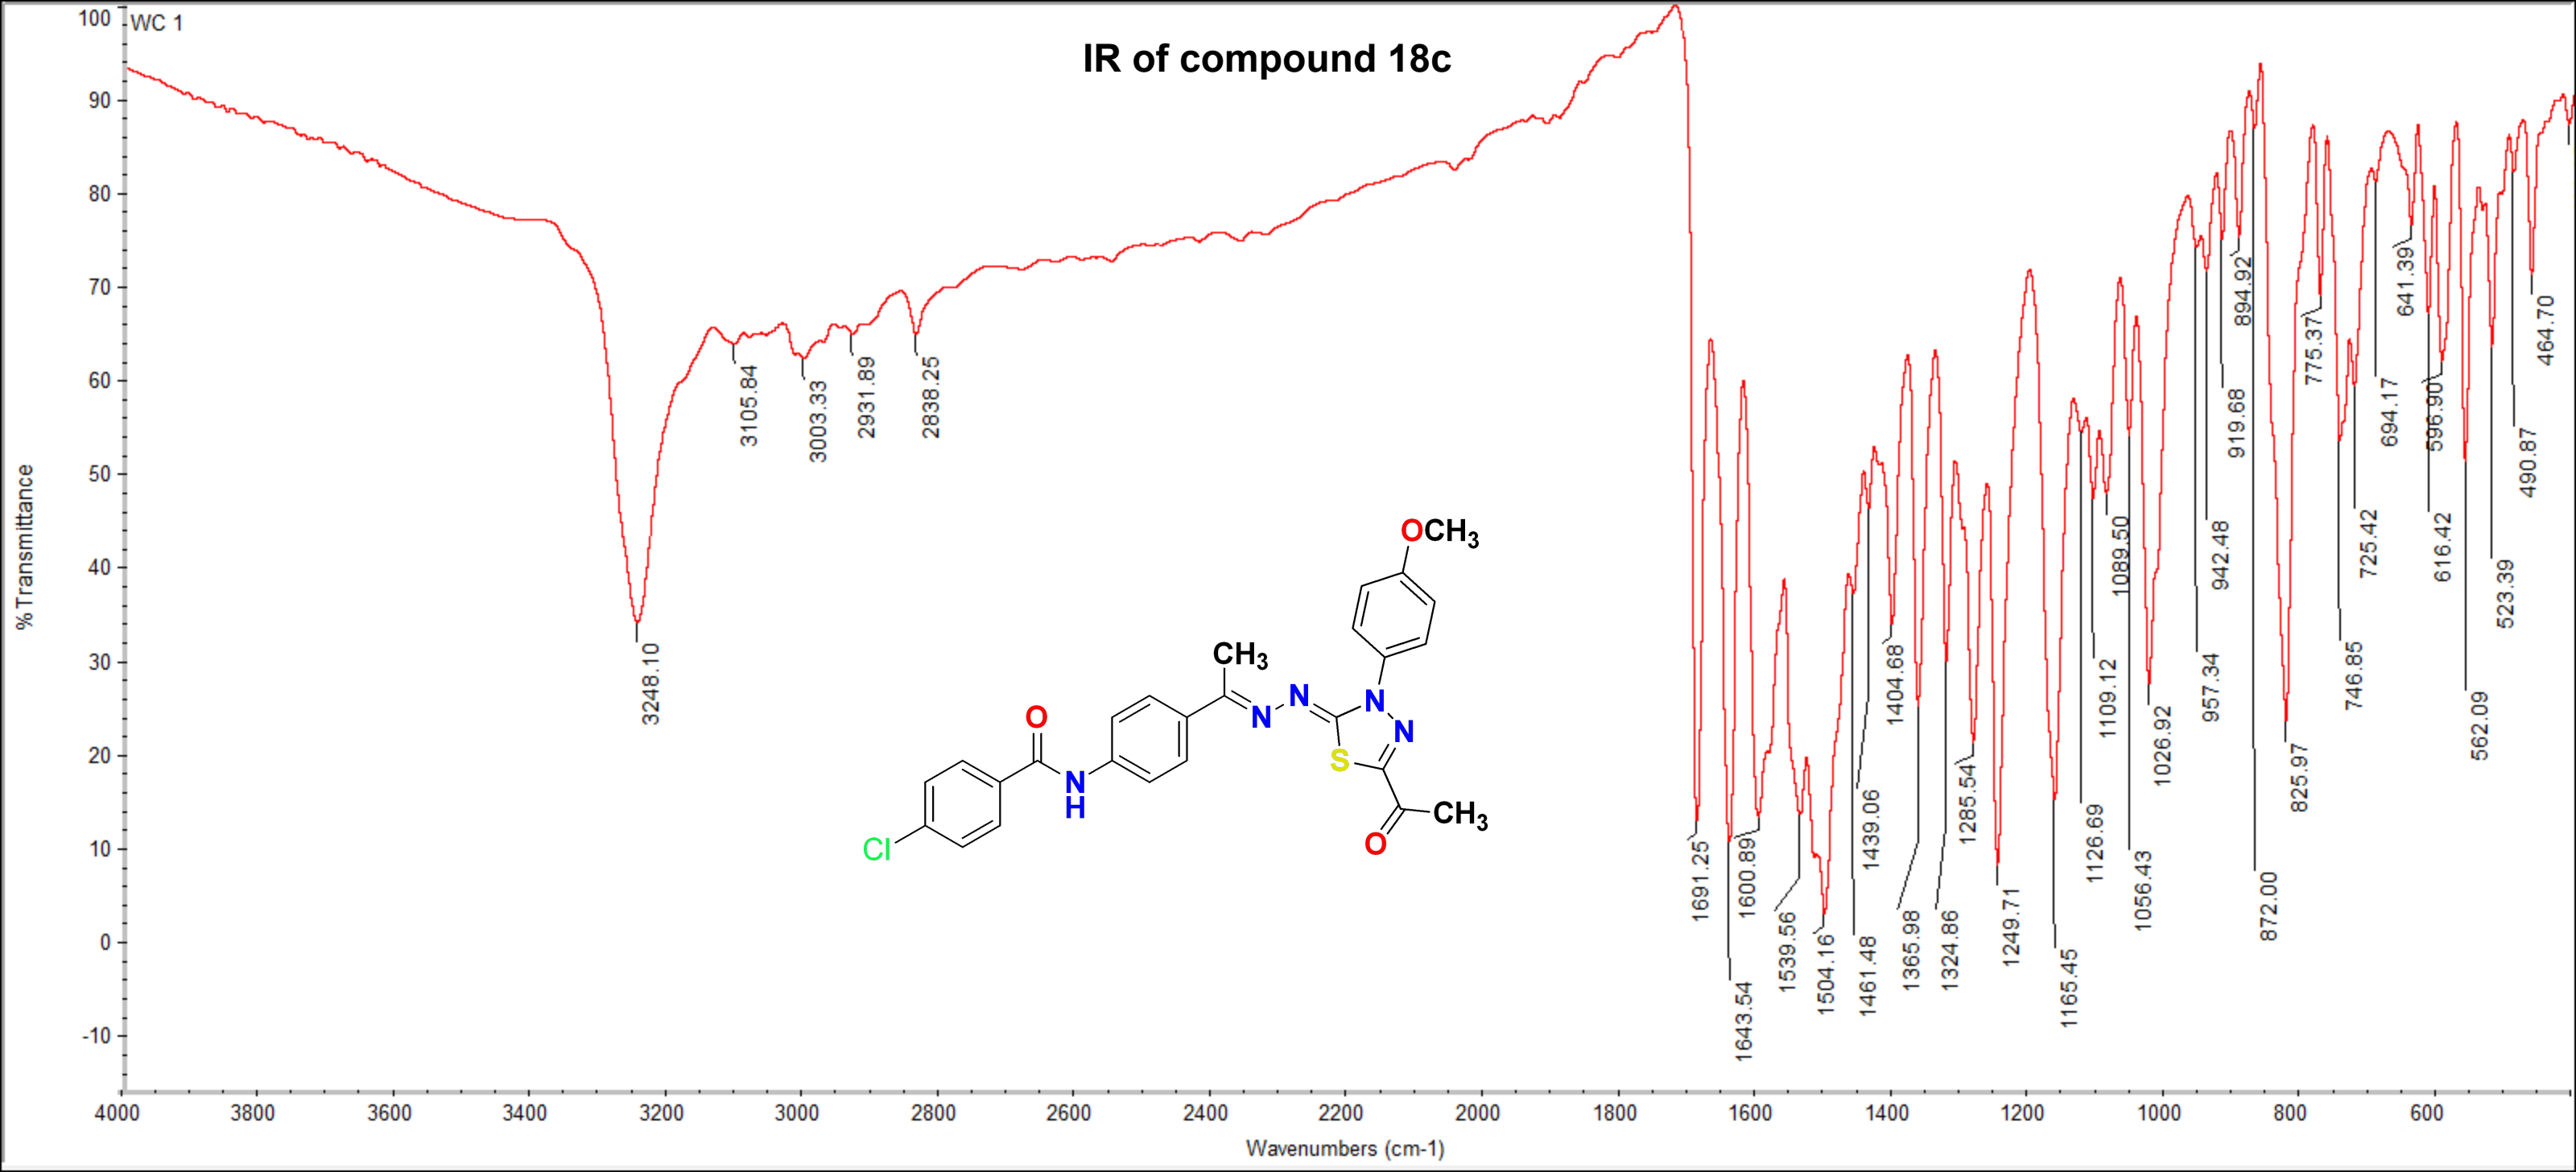



# <sup>1</sup>H NMR of compound 18c

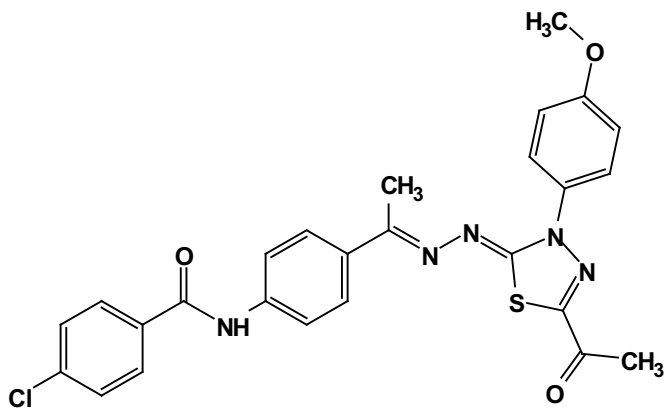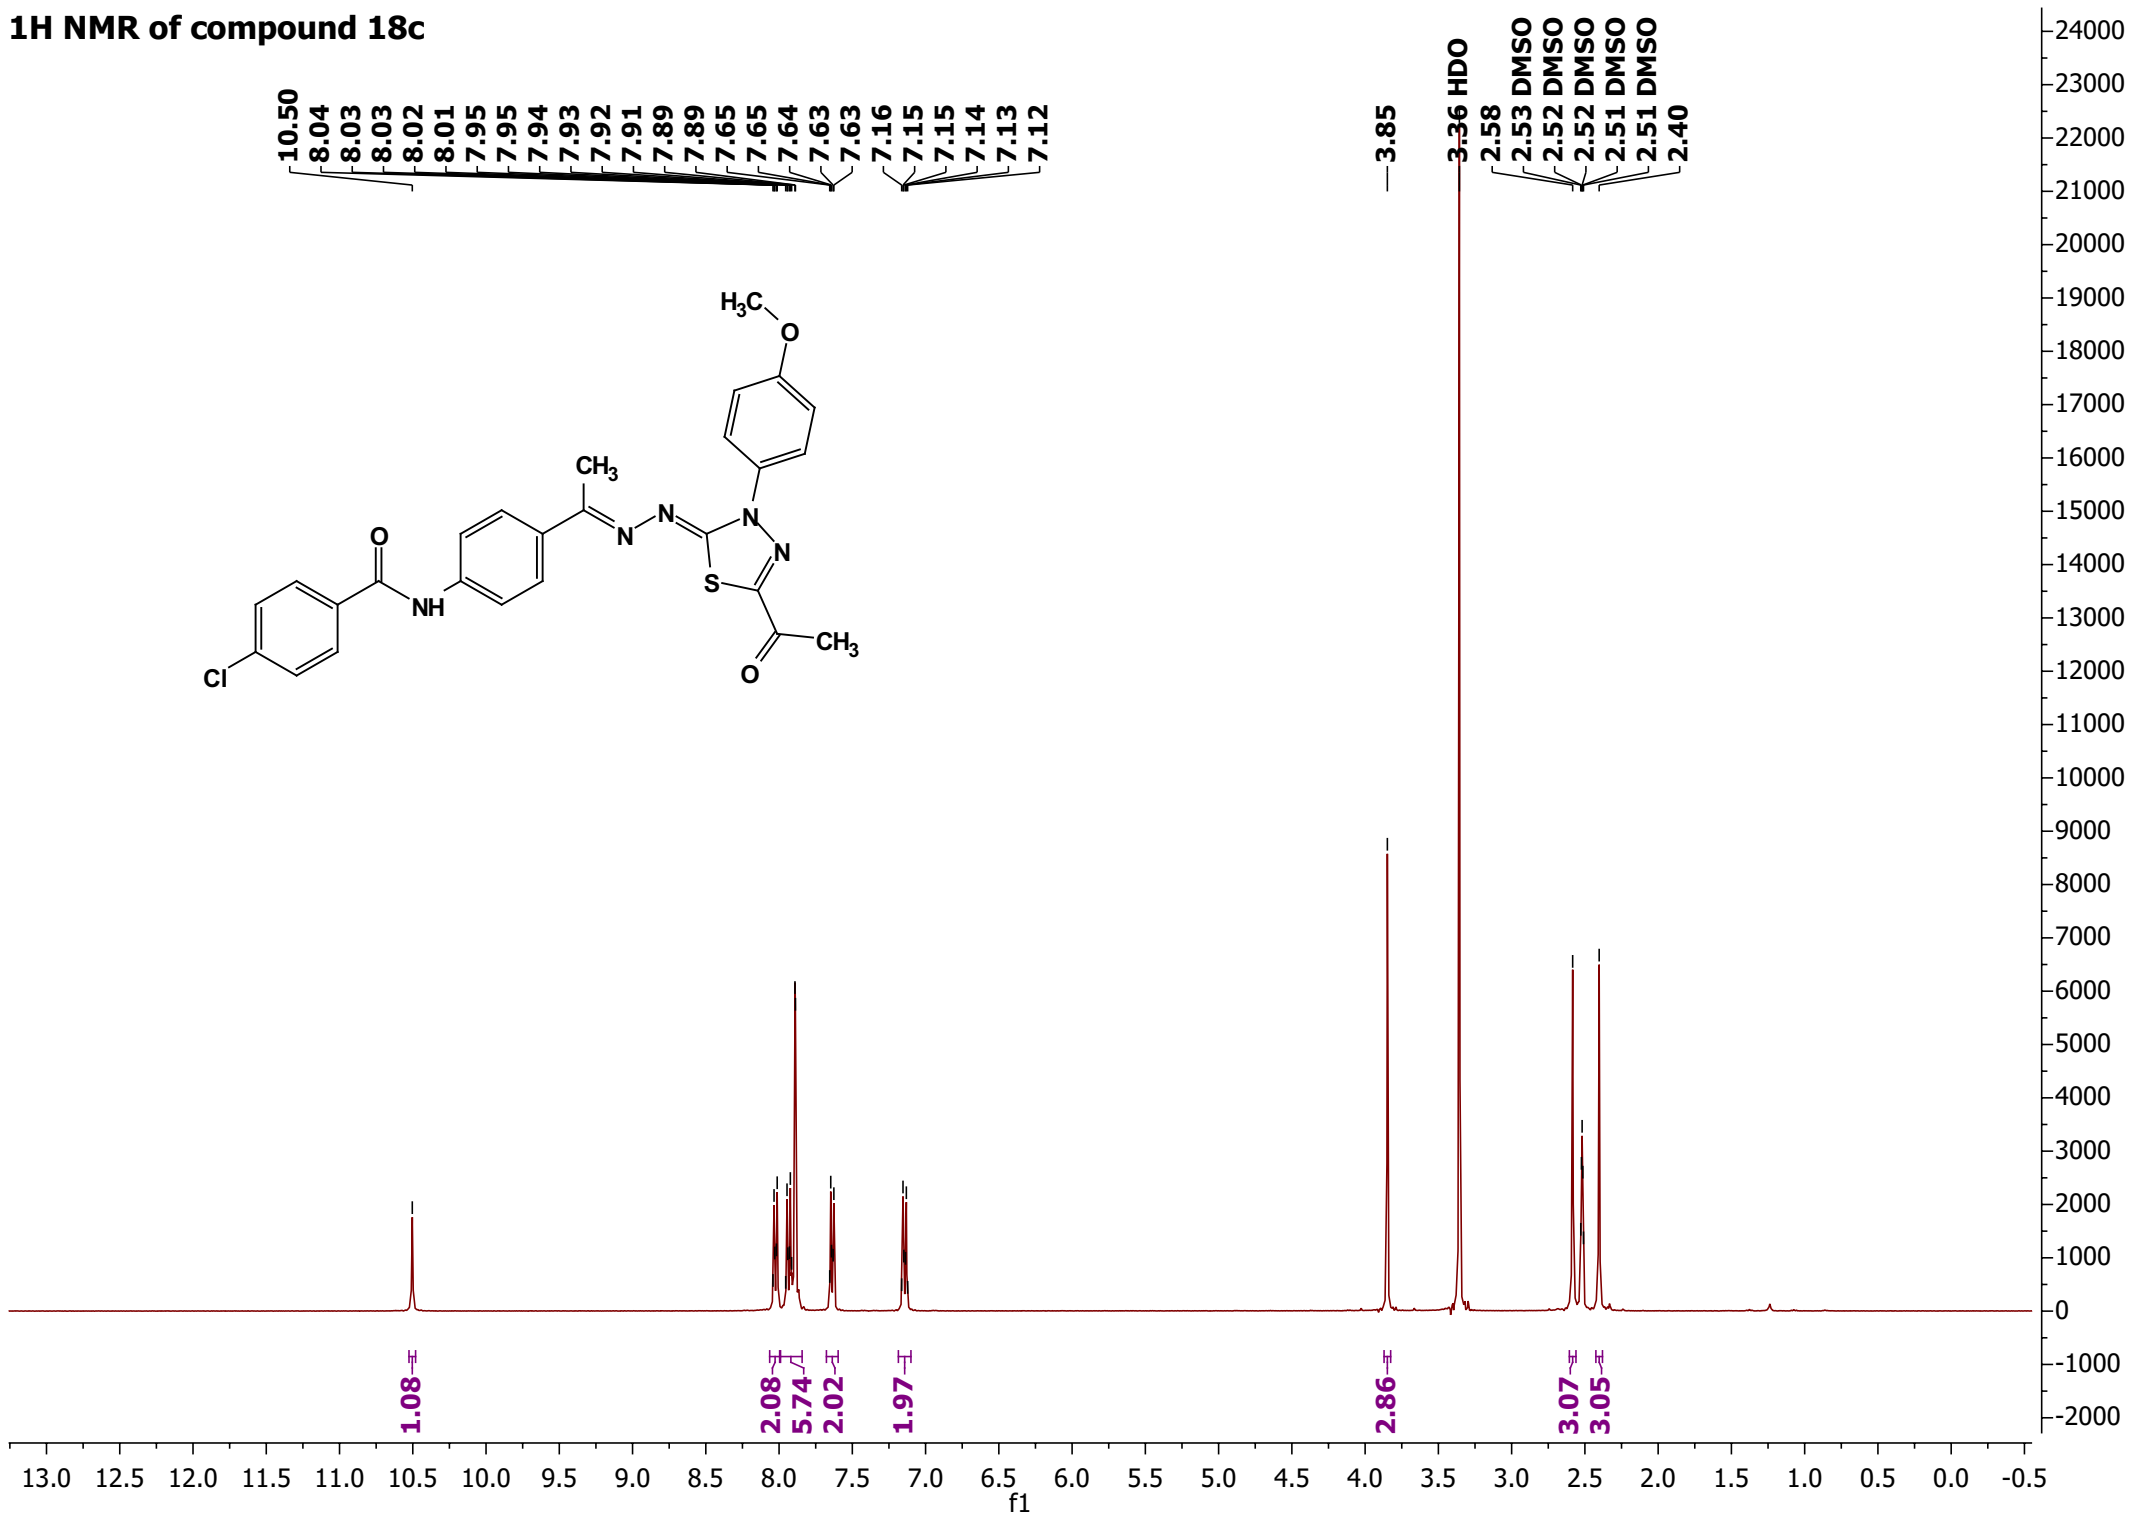

# 1H NMR of compound 18c

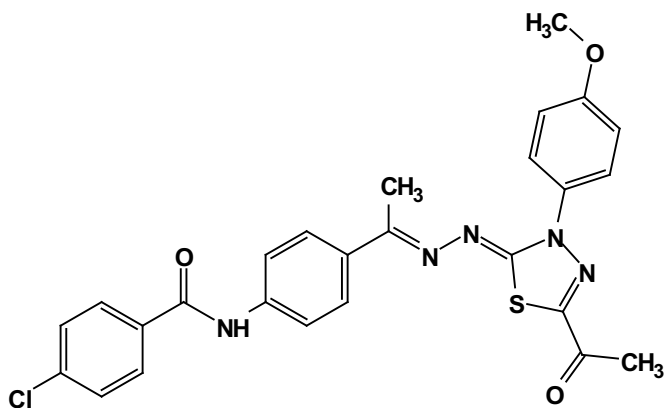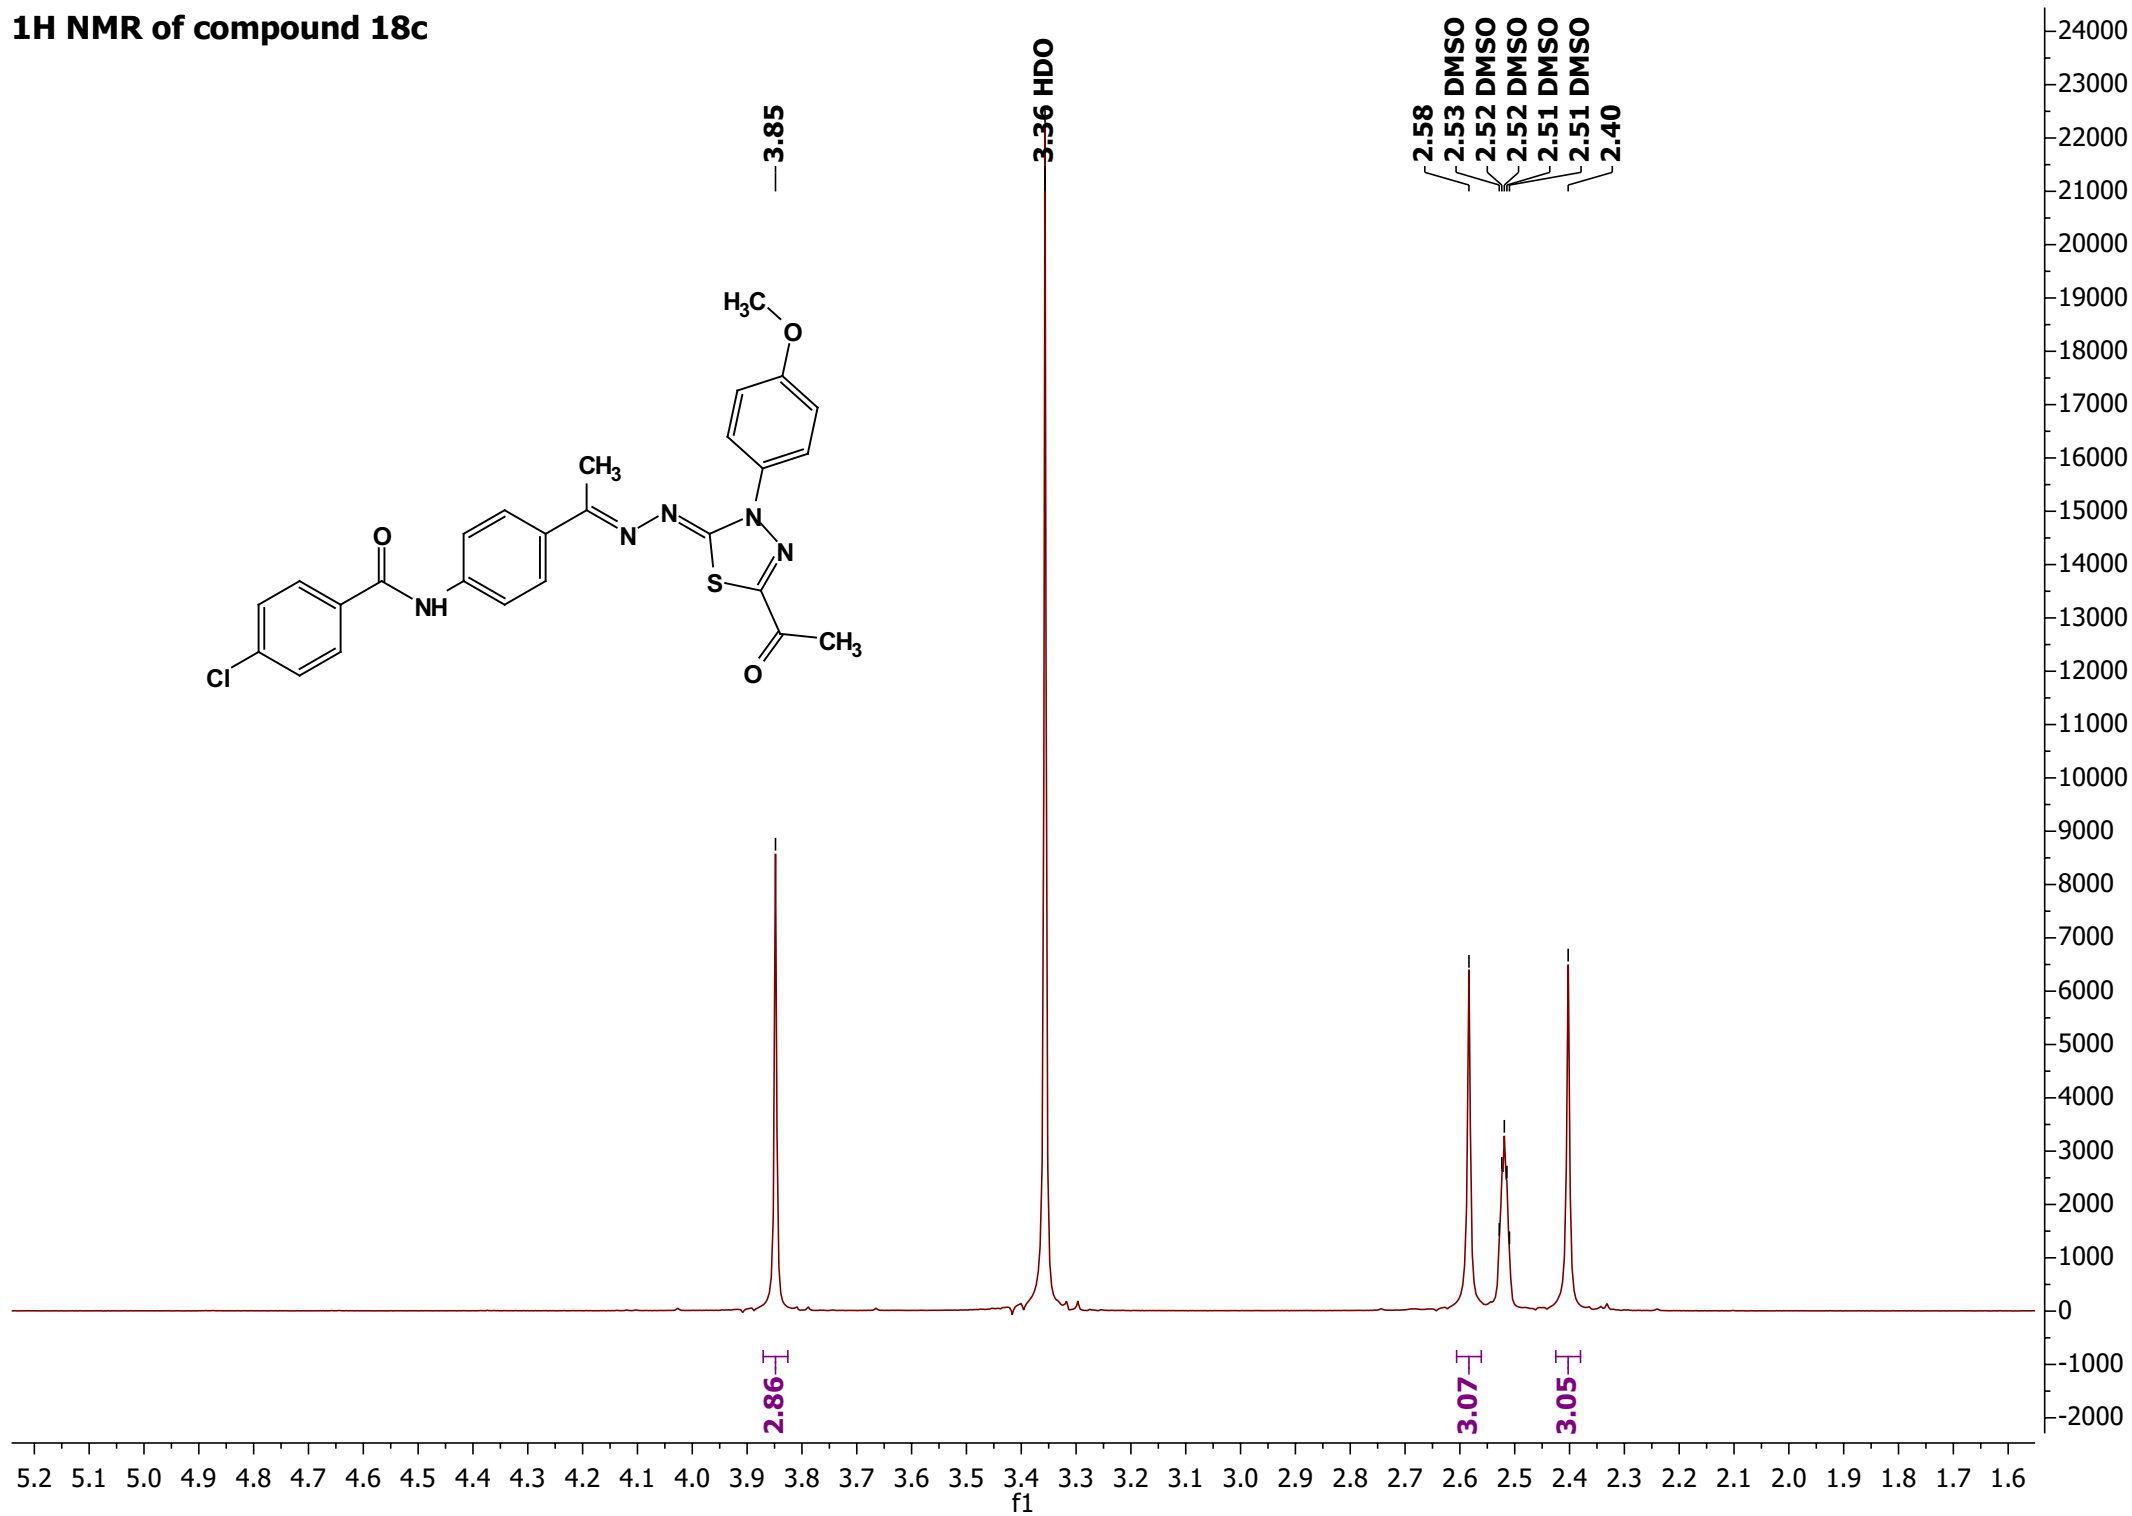

# **<sup>1</sup>H NMR of compound 18c**

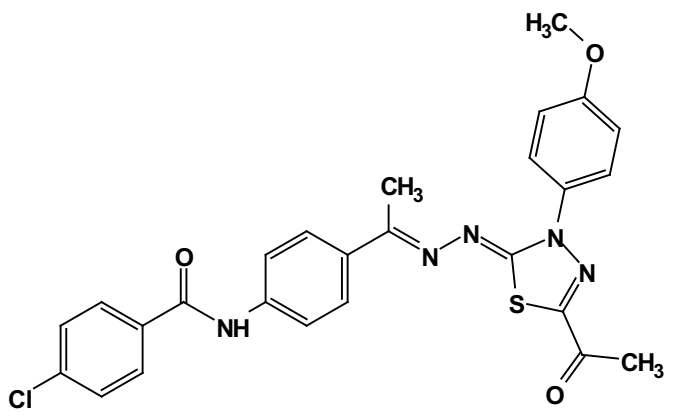

8.04  
8.03  
8.03  
8.02  
8.01  
7.95  
7.95  
7.94  
7.93  
7.92  
7.91  
7.89  
7.89

7.65  
7.65  
7.64  
7.63  
7.63

7.16  
7.15  
7.15  
7.14  
7.13  
7.12

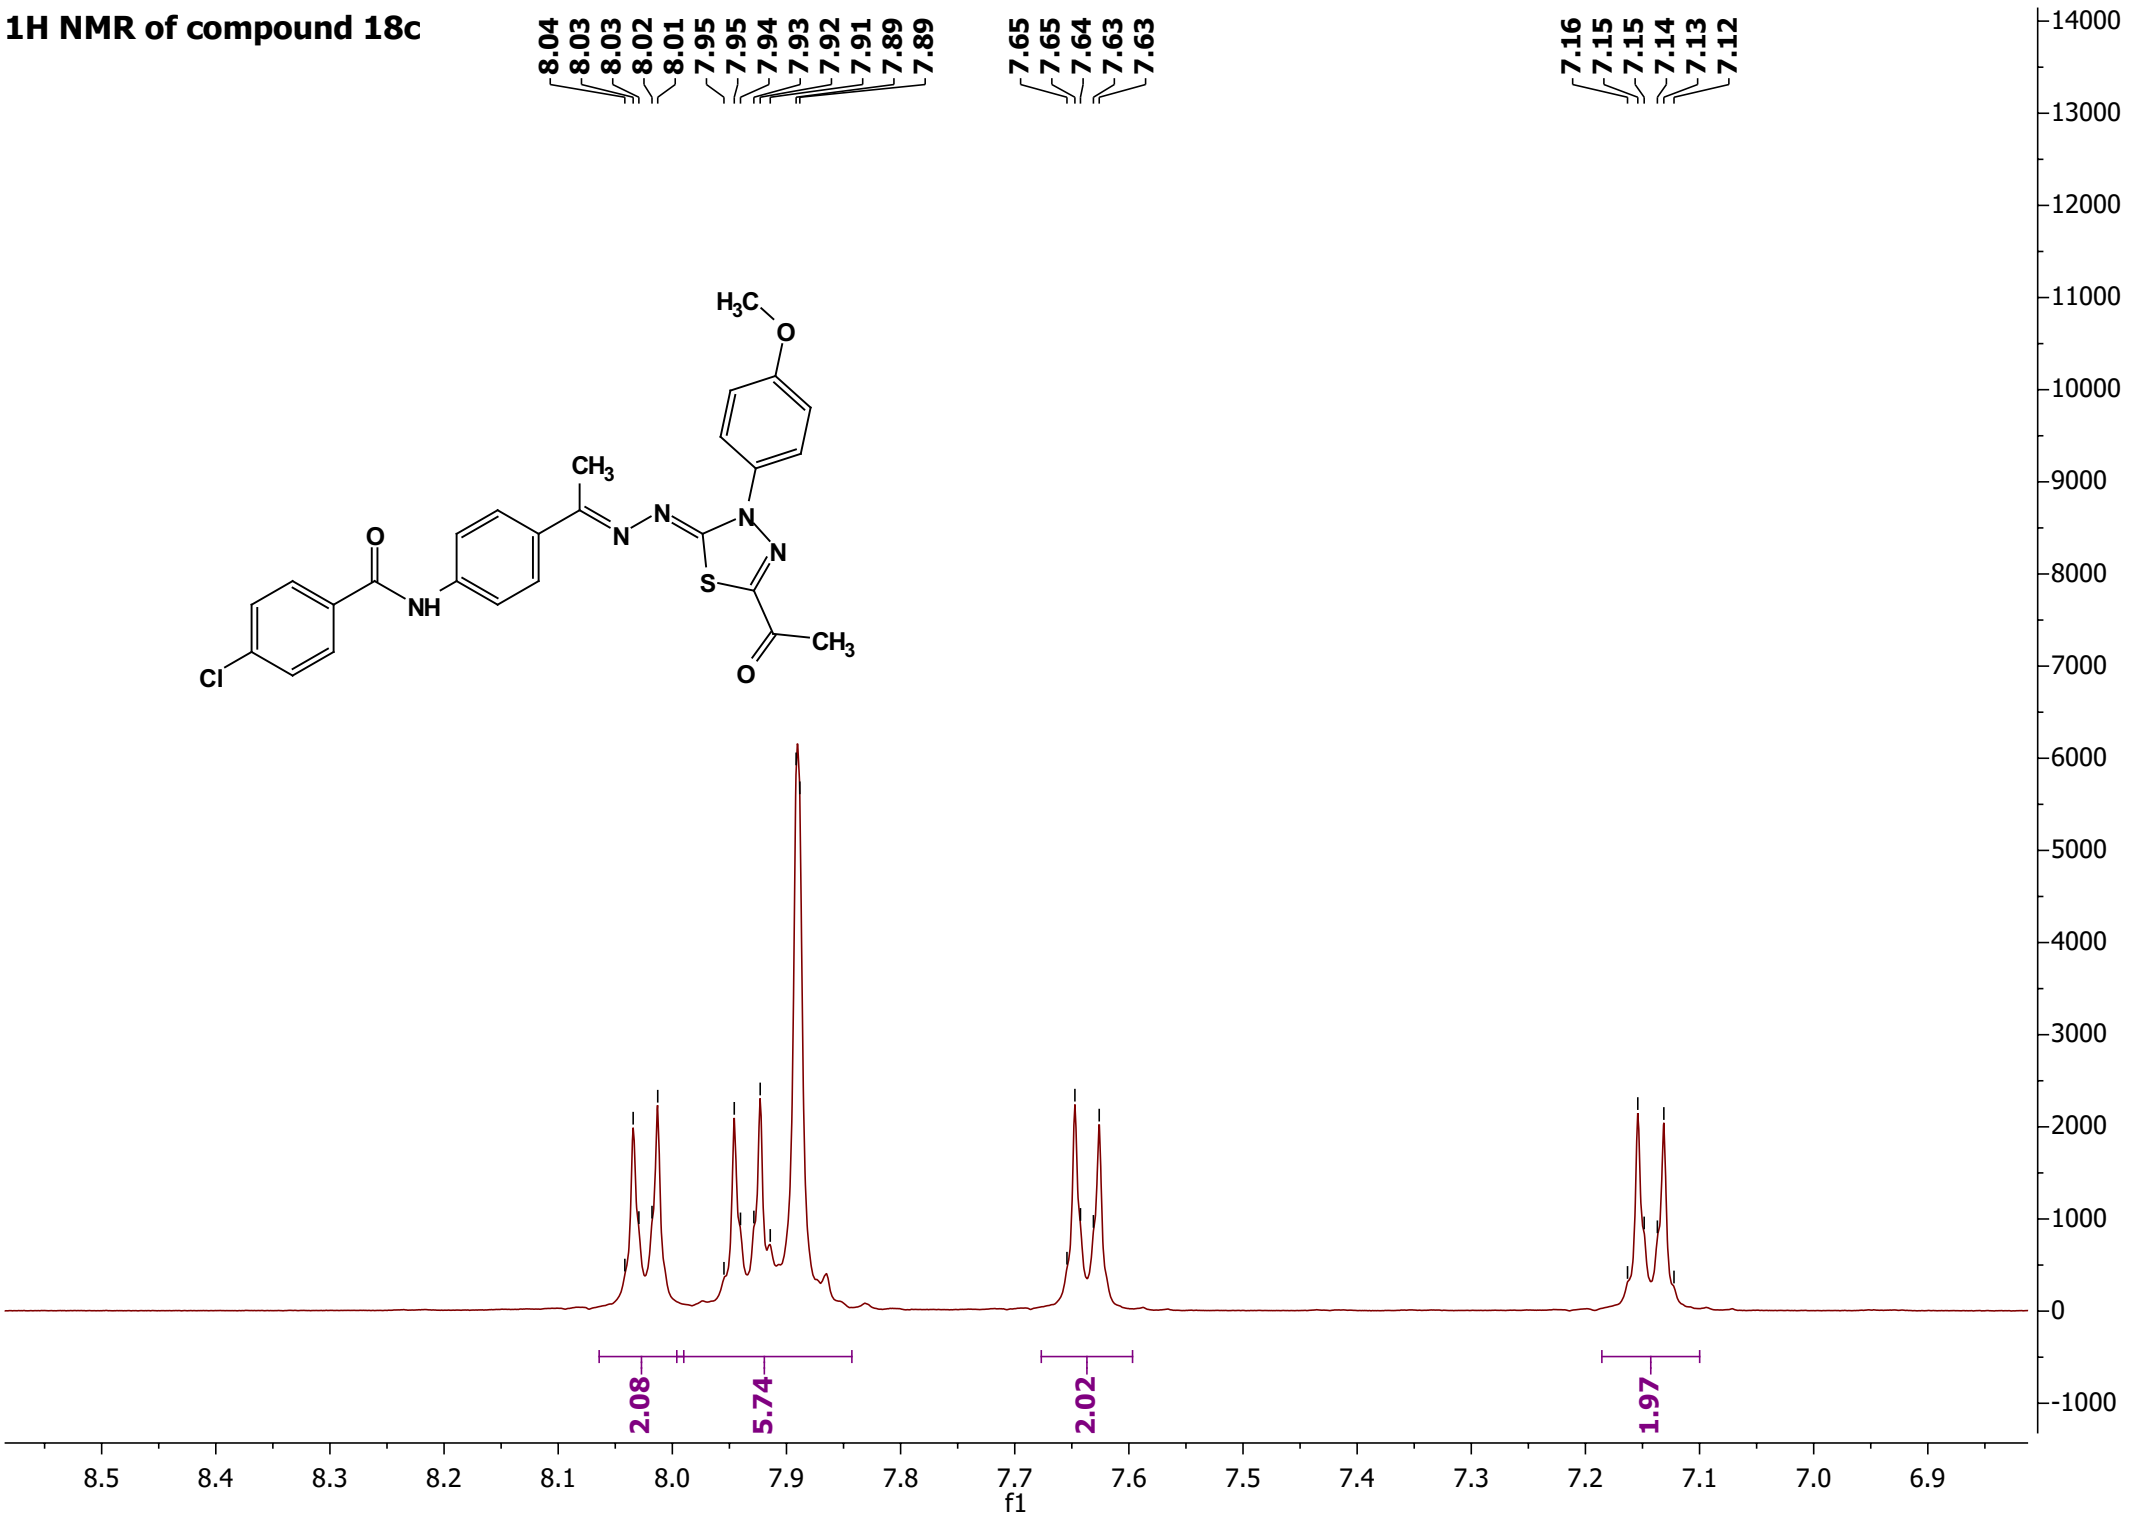

# <sup>13</sup>C NMR of compound 18c

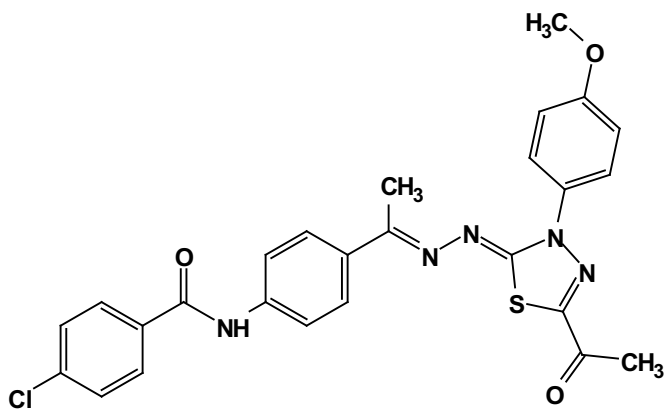

190.13

165.02

164.83

160.00

158.65

150.57

141.02

137.03

133.93

133.04

132.23

130.19

128.97

127.41

124.50

120.38

114.68

55.96

40.62 DMSO

40.42 DMSO

40.21 DMSO

40.00 DMSO

39.79 DMSO

39.58 DMSO

39.37 DMSO

25.47

15.60

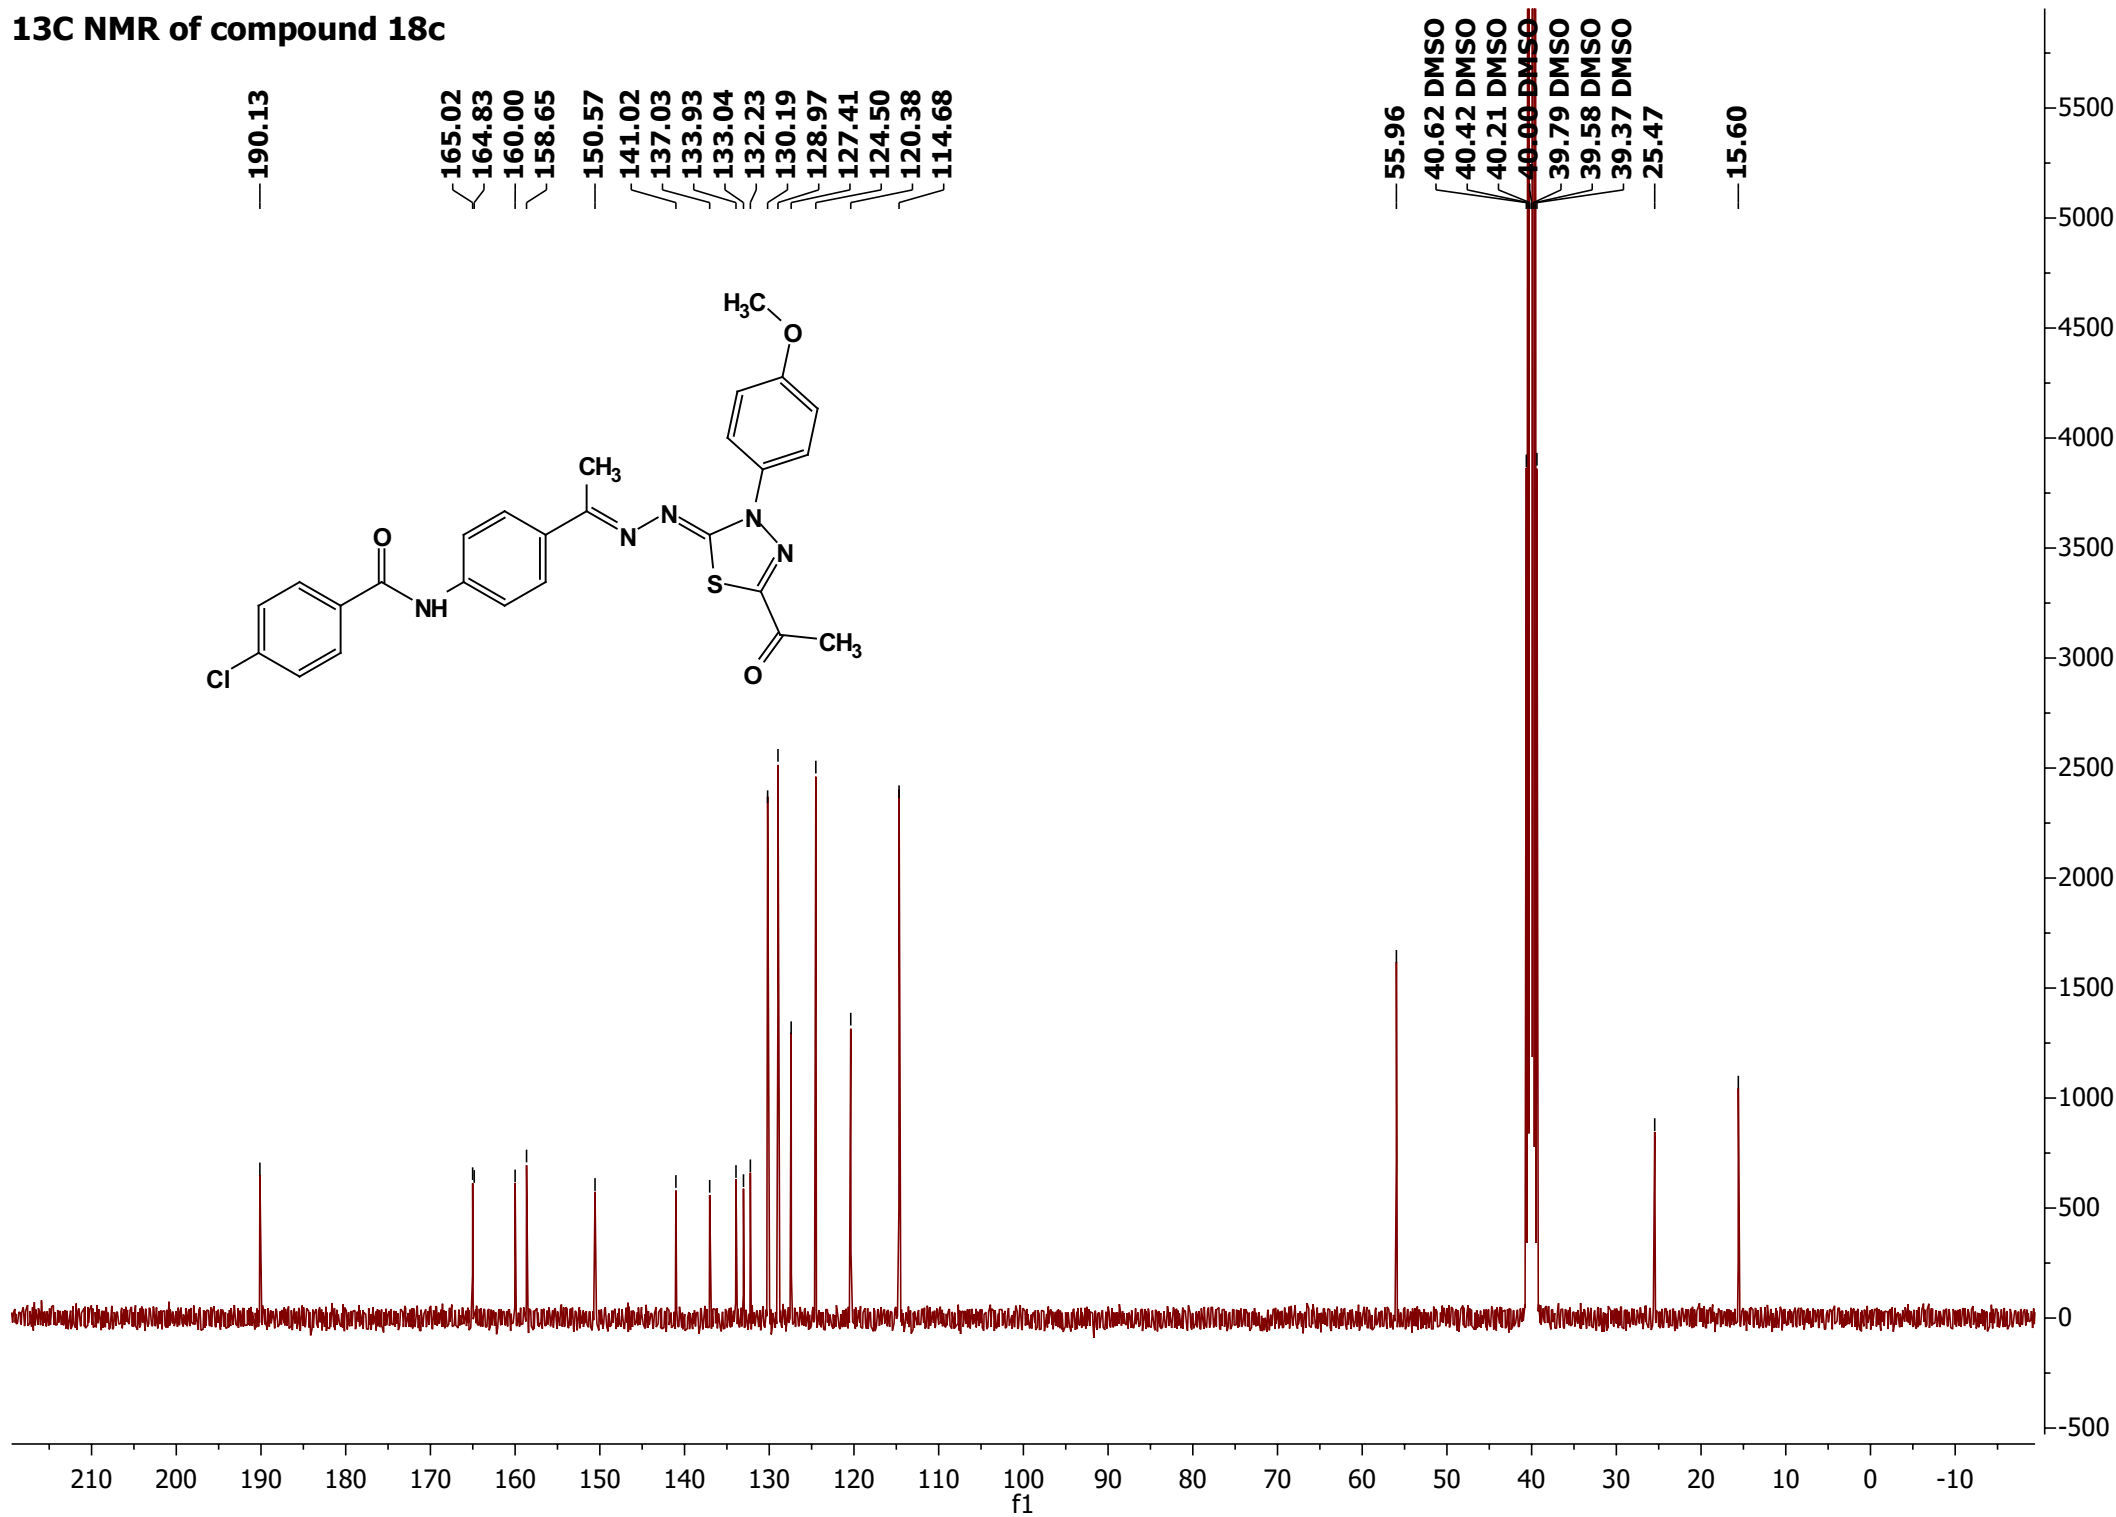

# <sup>13</sup>C NMR of compound 18c

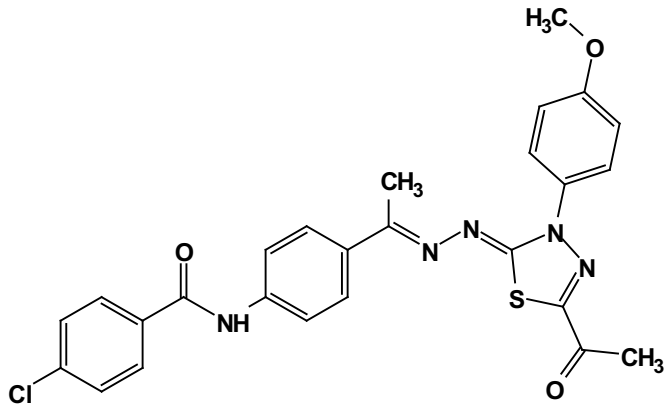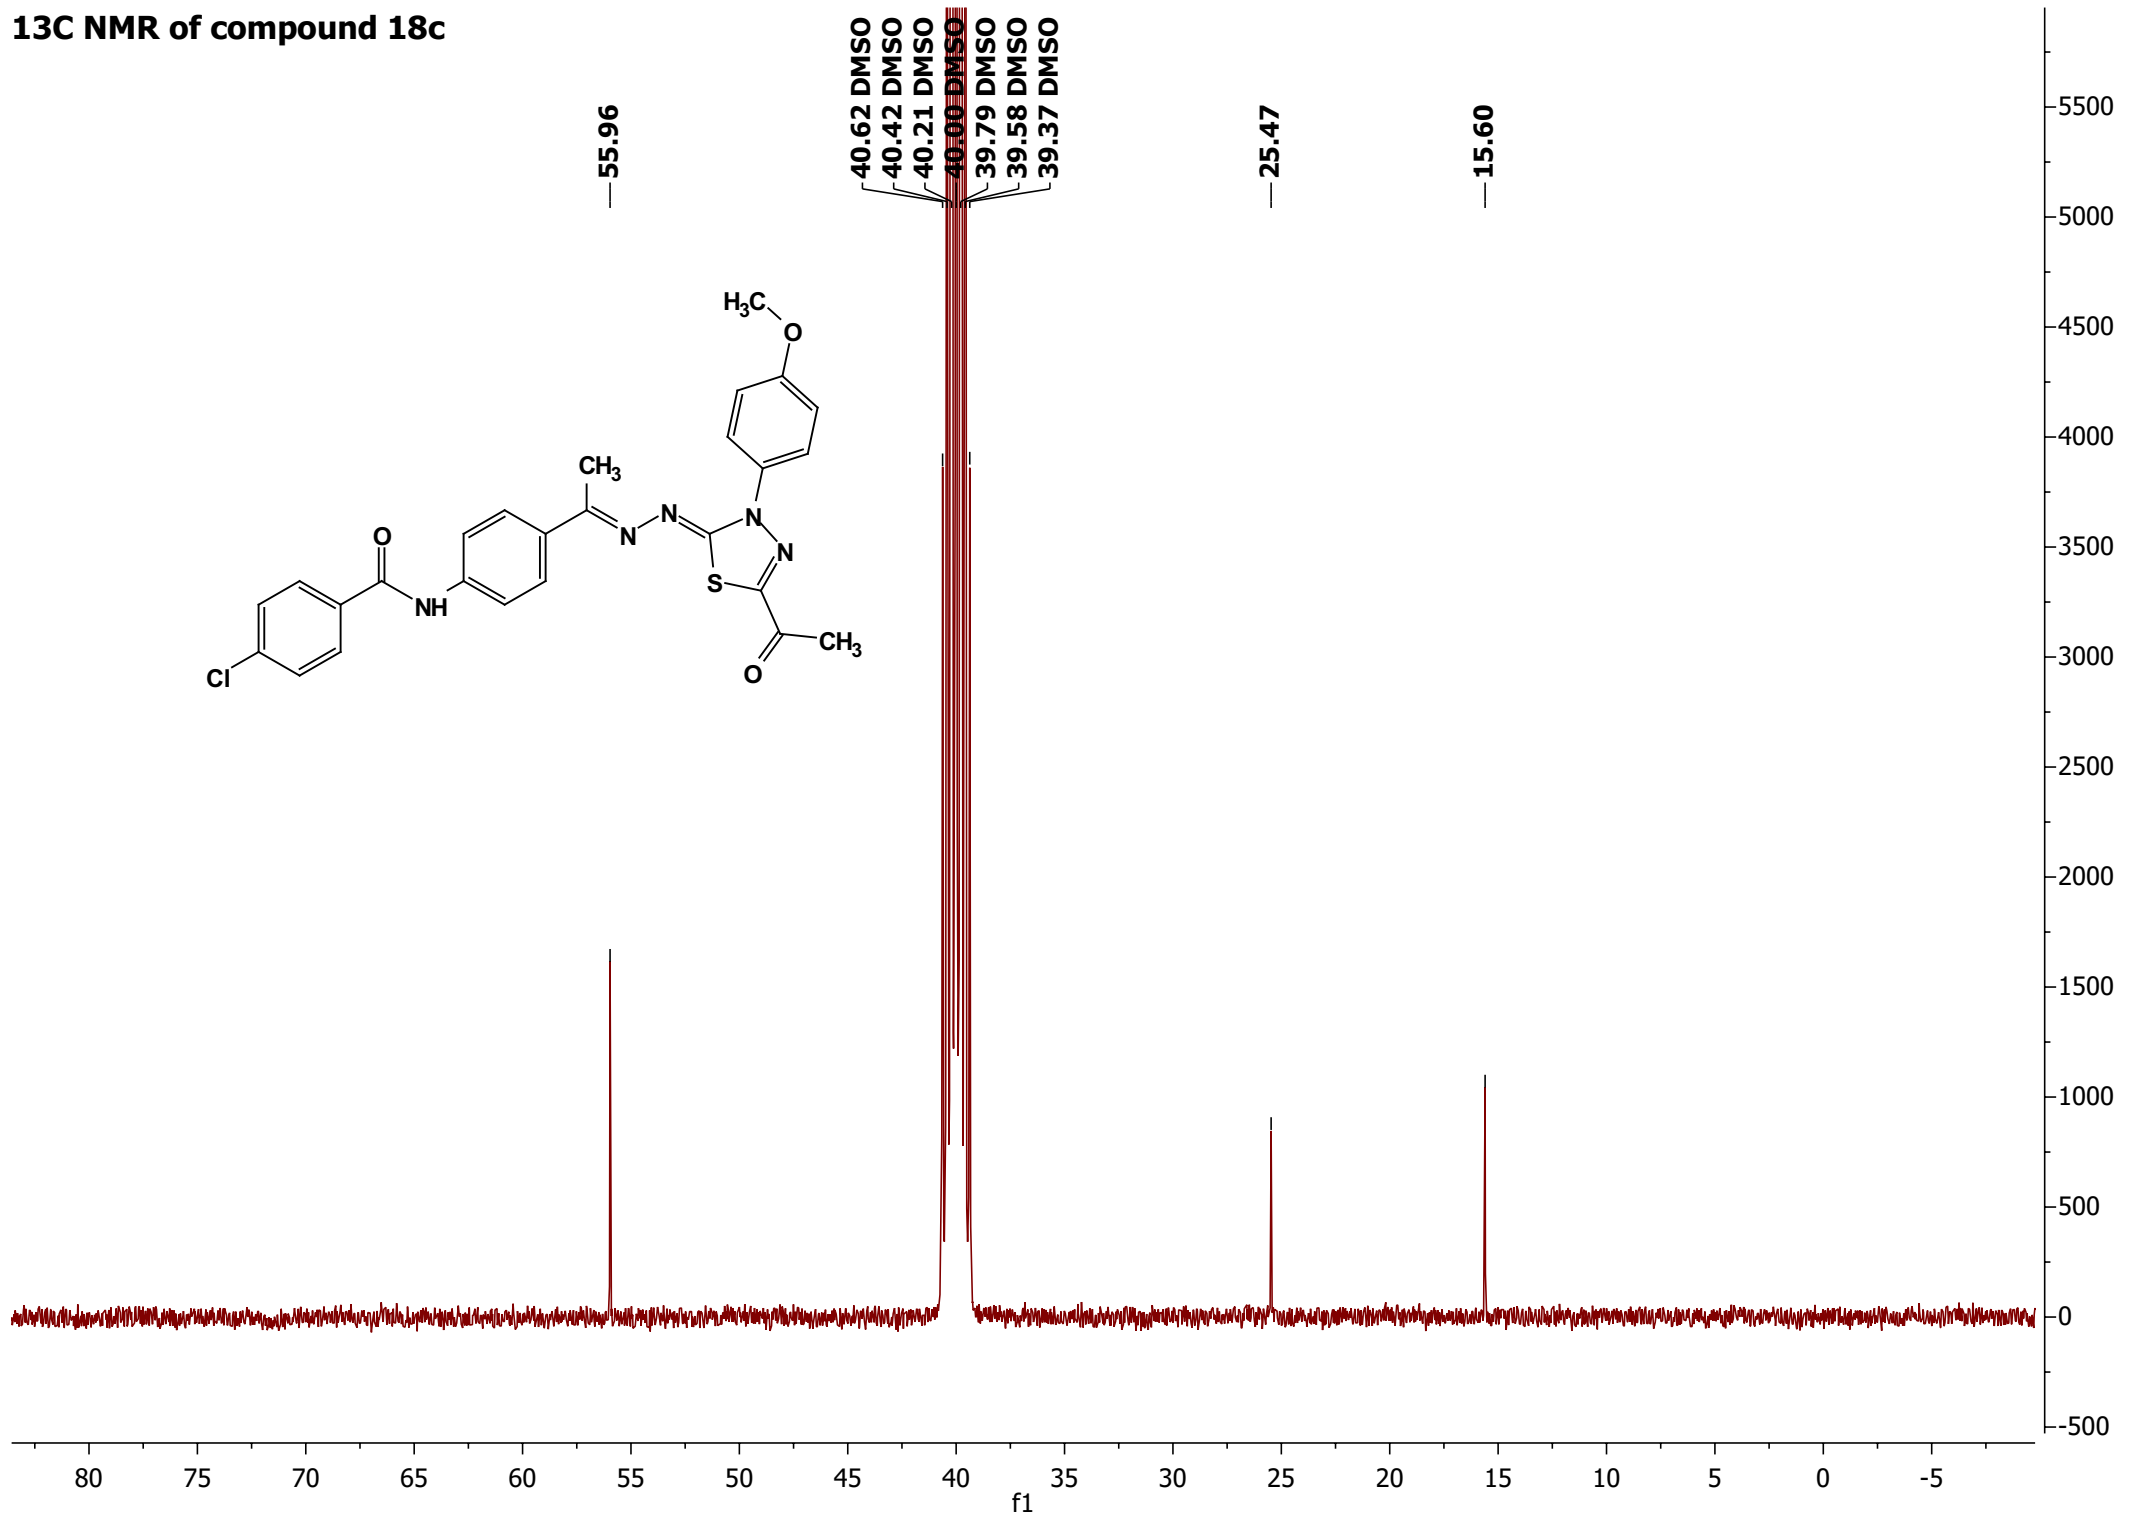

# <sup>13</sup>C NMR of compound 18c

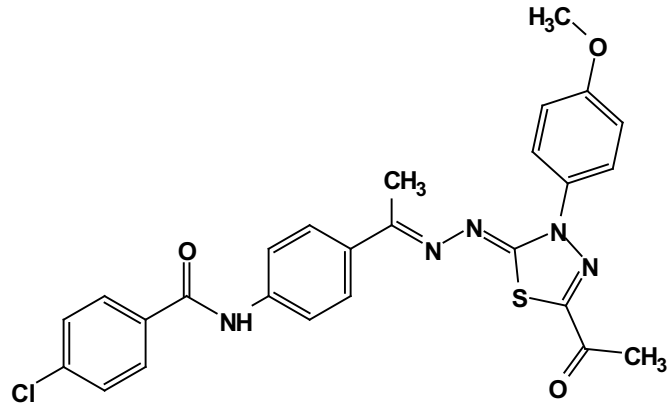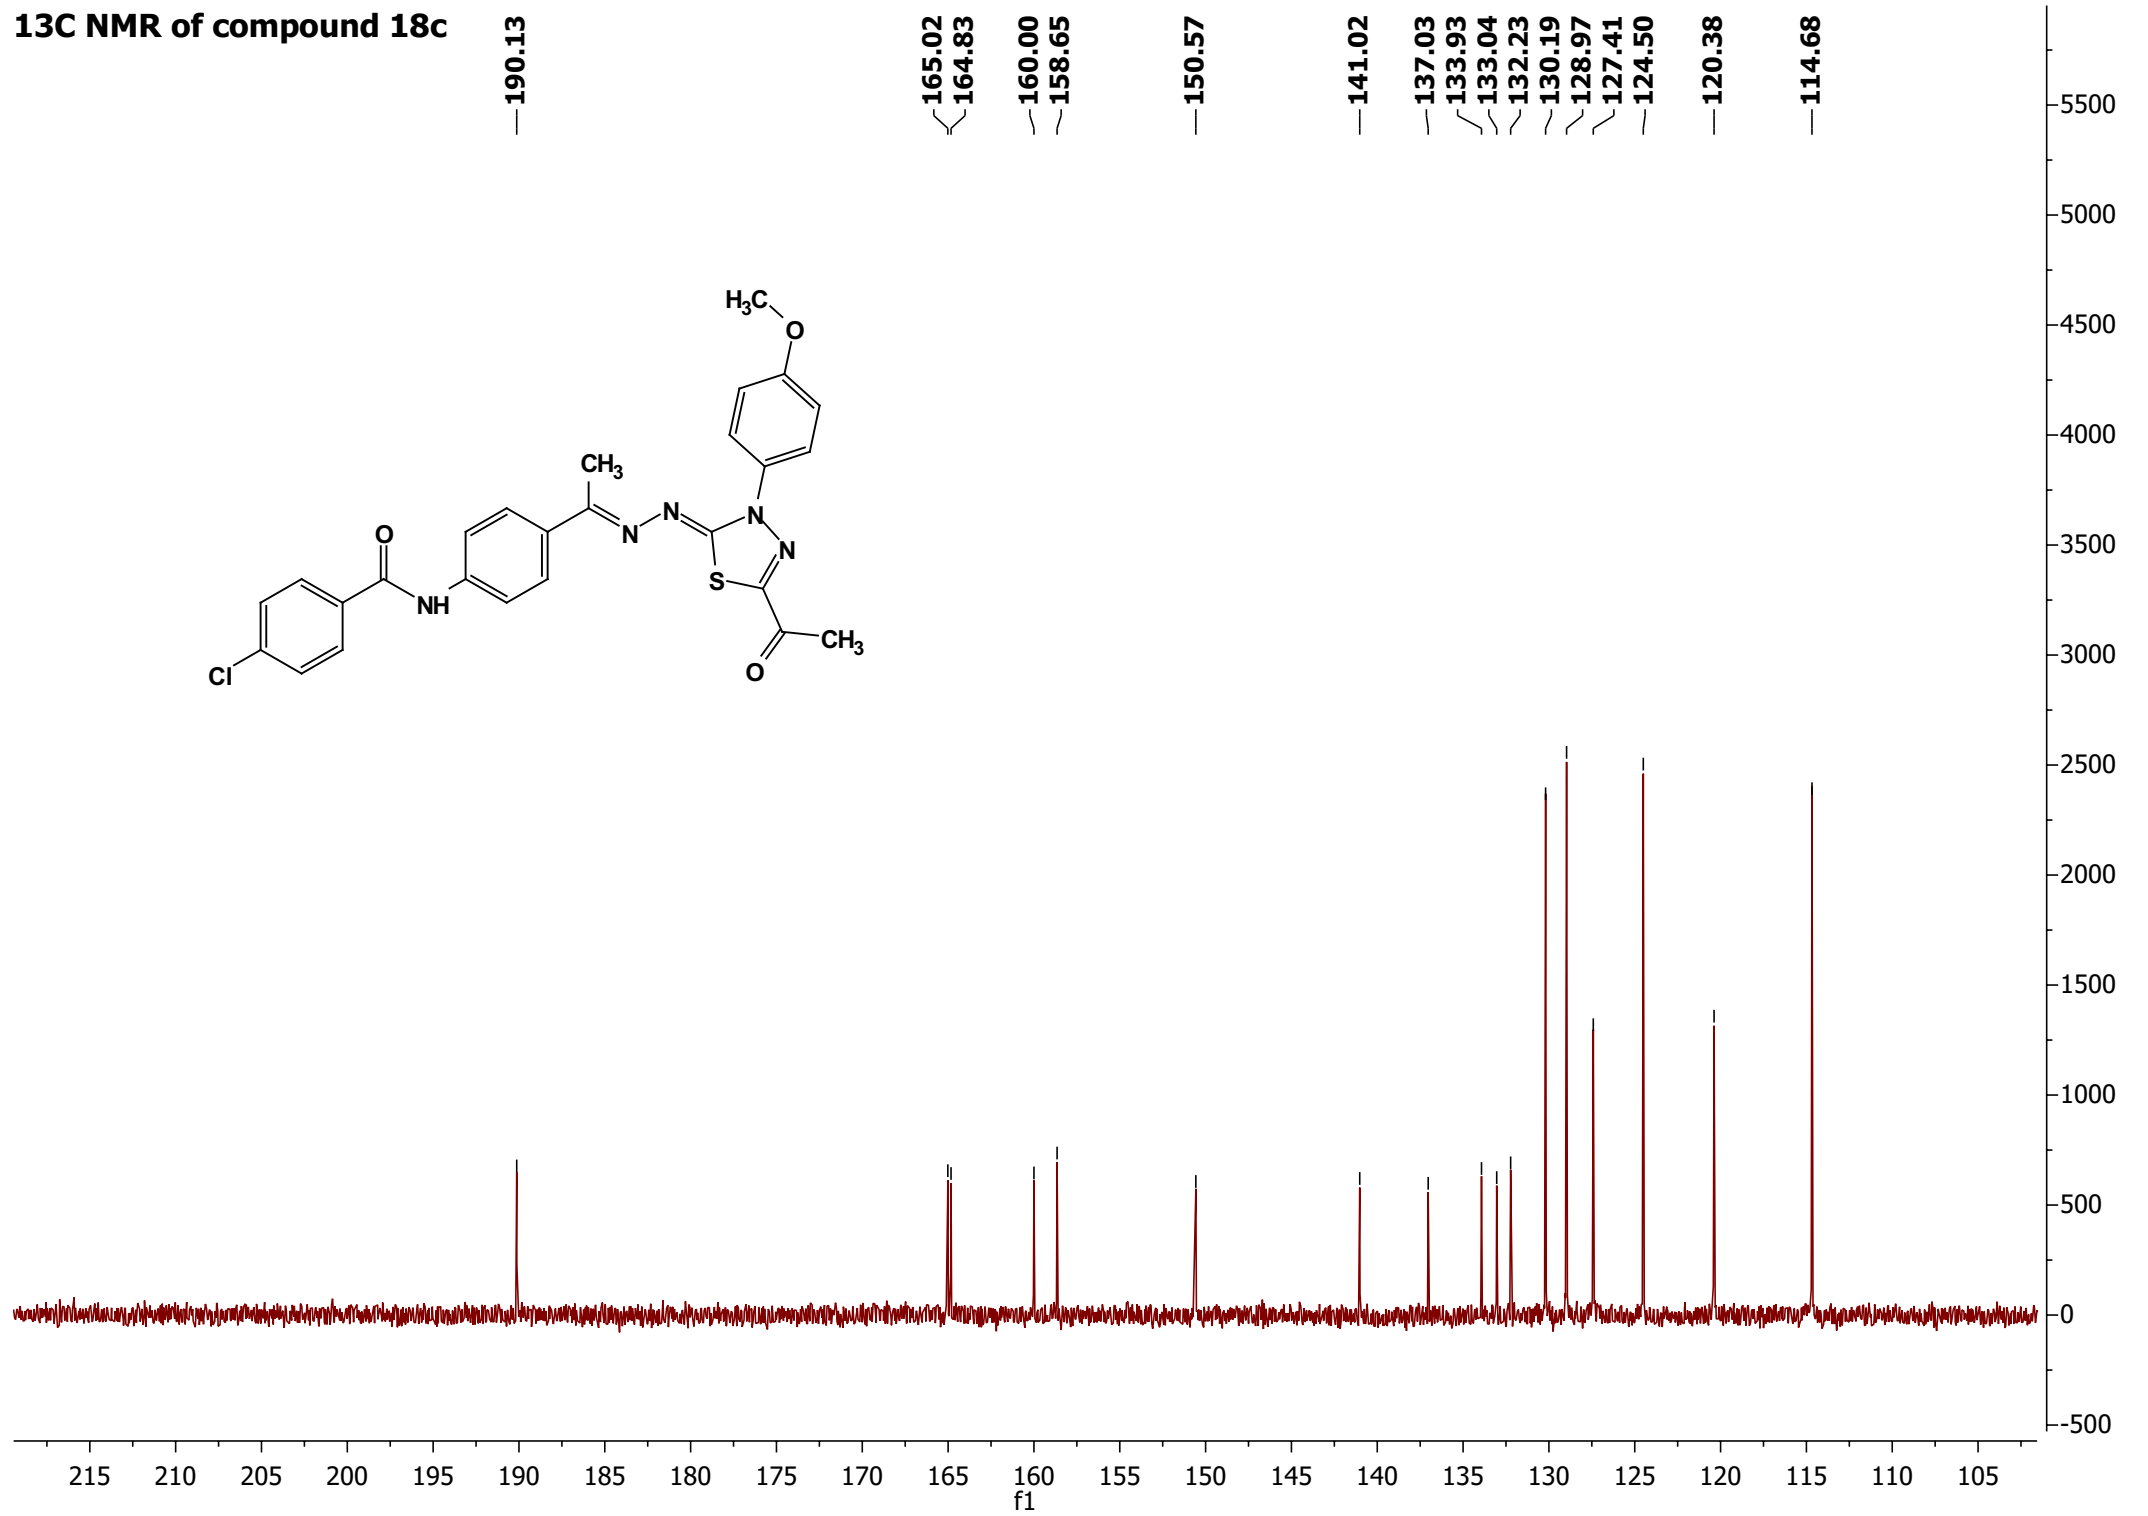

# Mass spec. of compound 18c

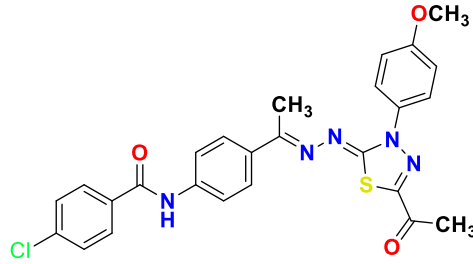

ibrahim-hassan-wc1 #180-182 RT: 3.03-3.06 AV: 3 SB: 15 3.53-3.63 , 3.46-3.58 NL: 1.78E2  
T: {0,0} + c EI Full ms [40.00-1000.00]

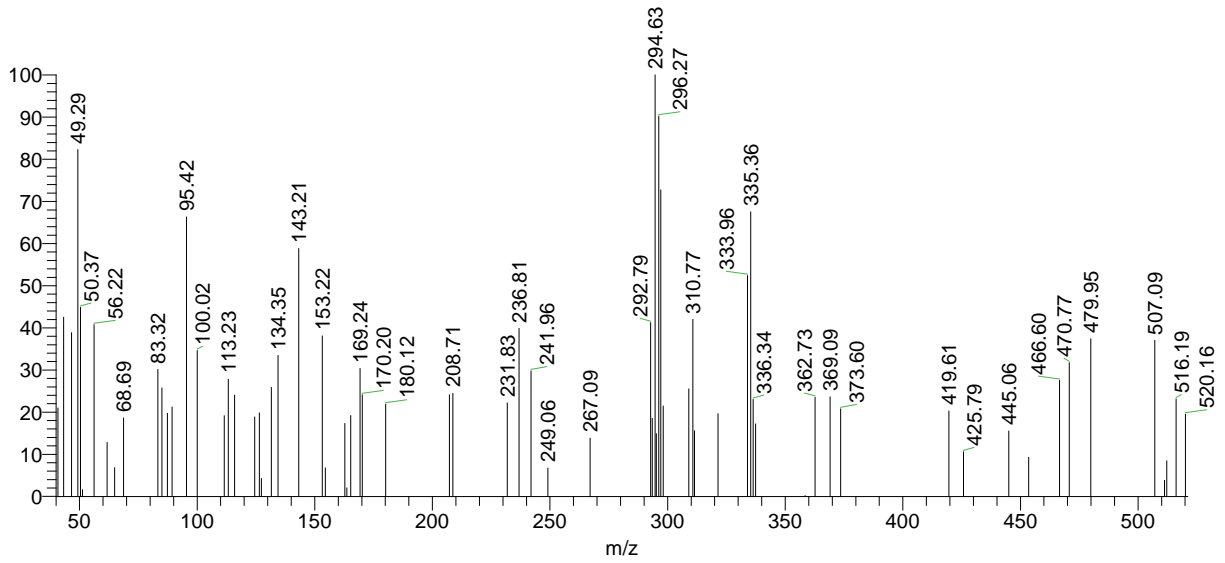

# IR of compound 18d

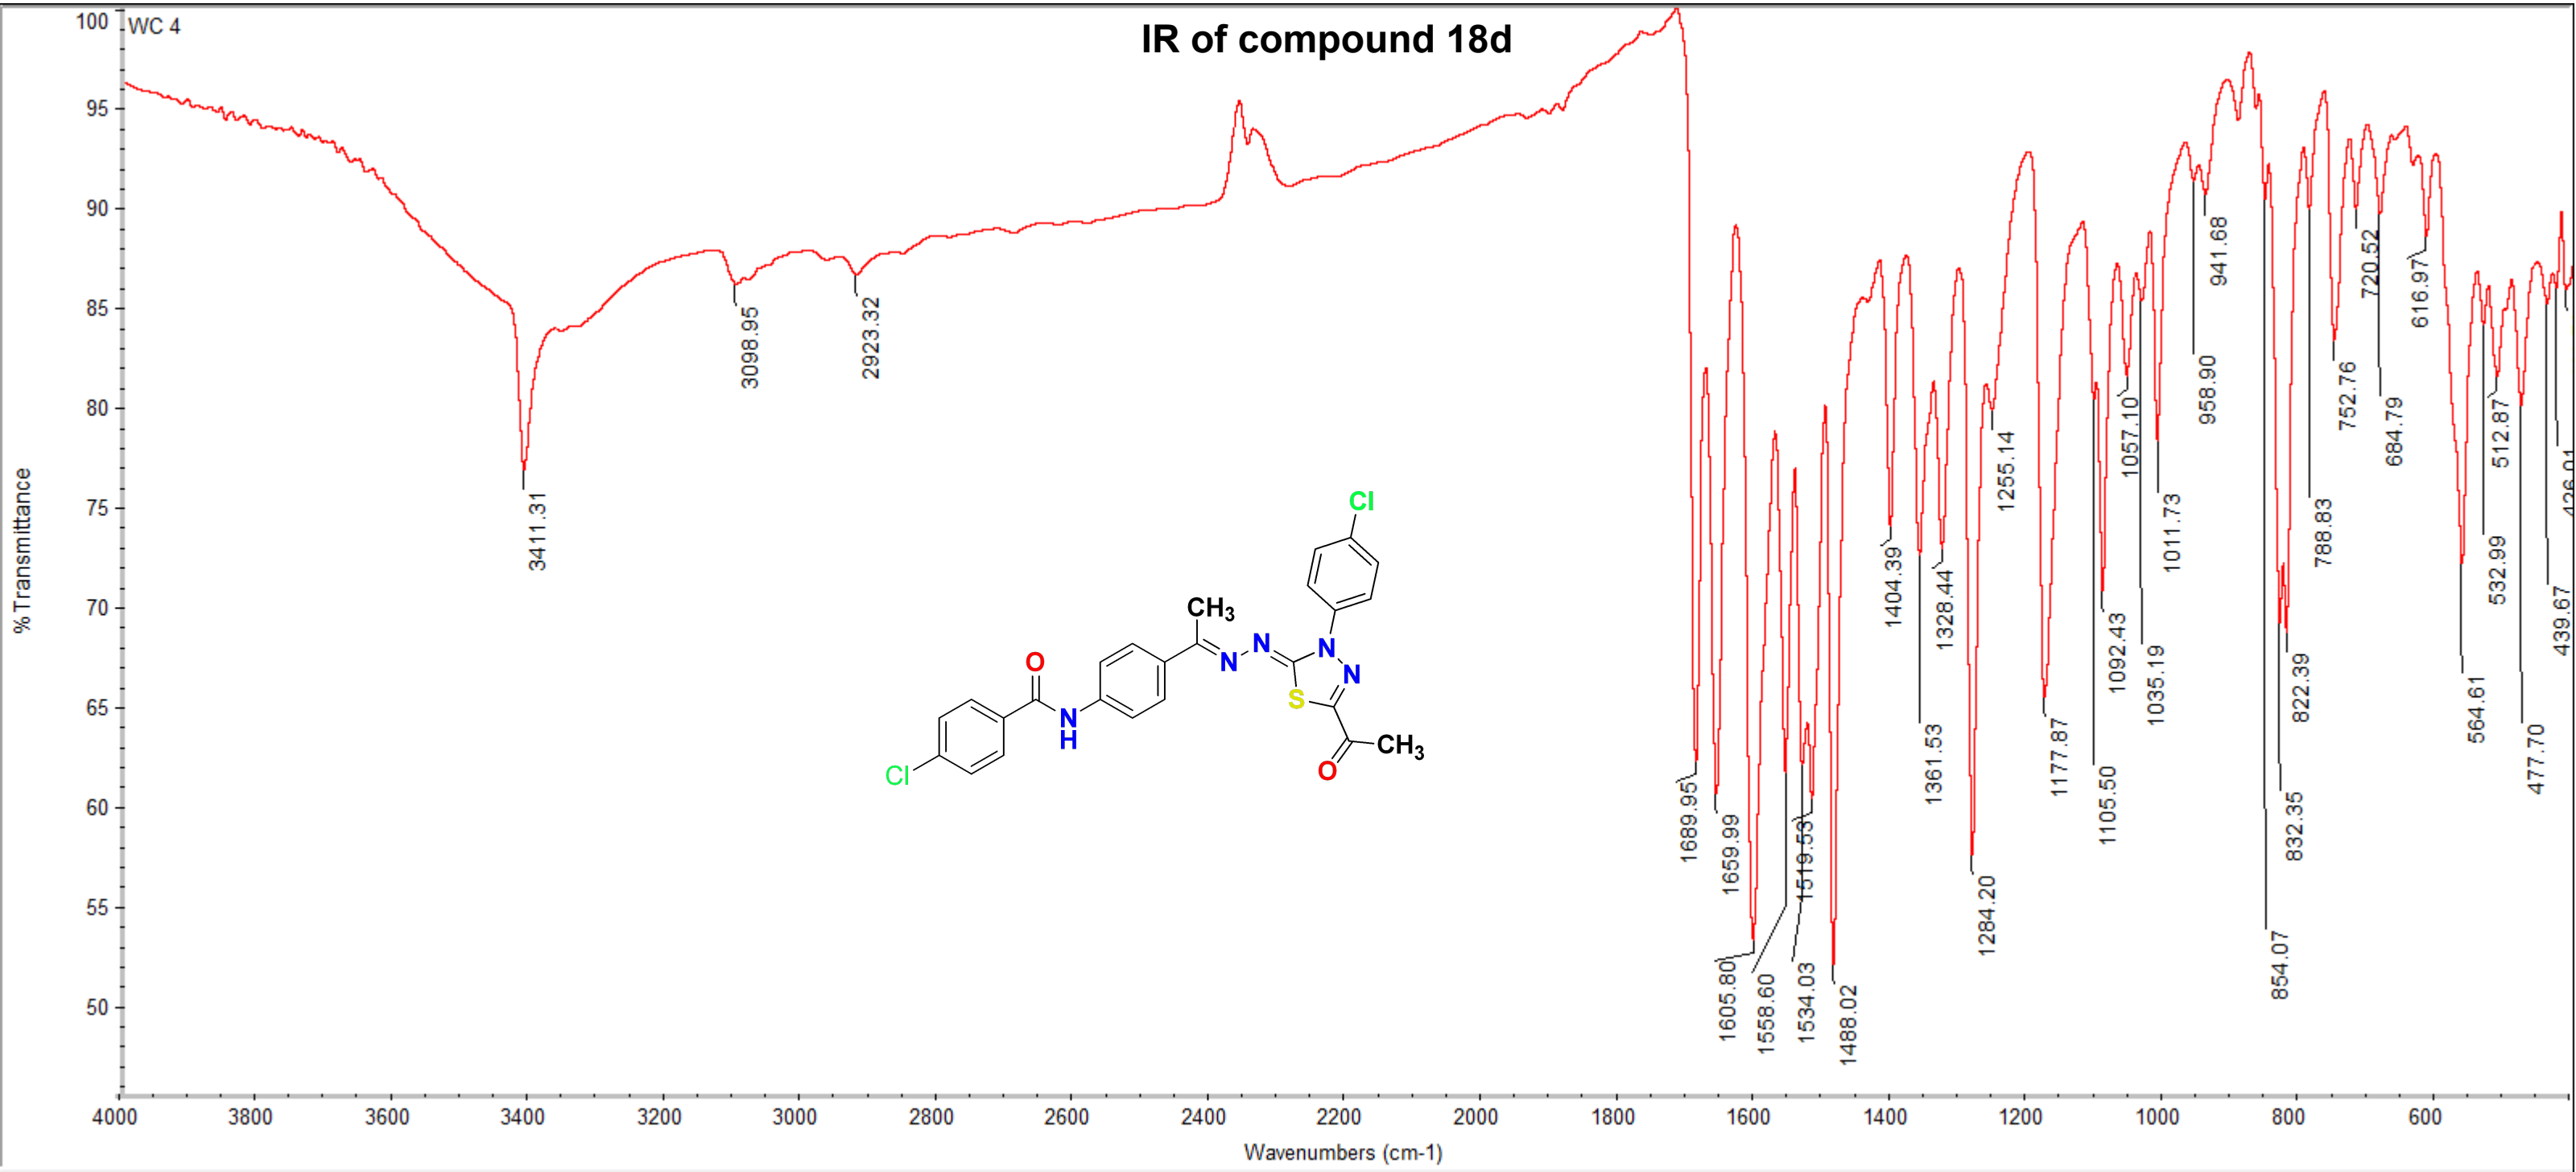



# 1H NMR of compound 18d

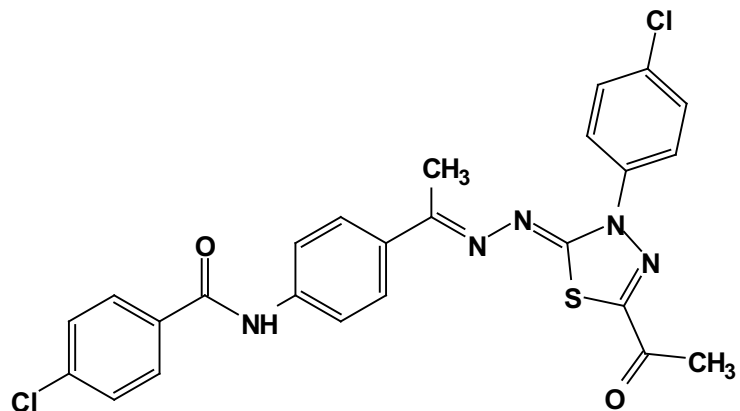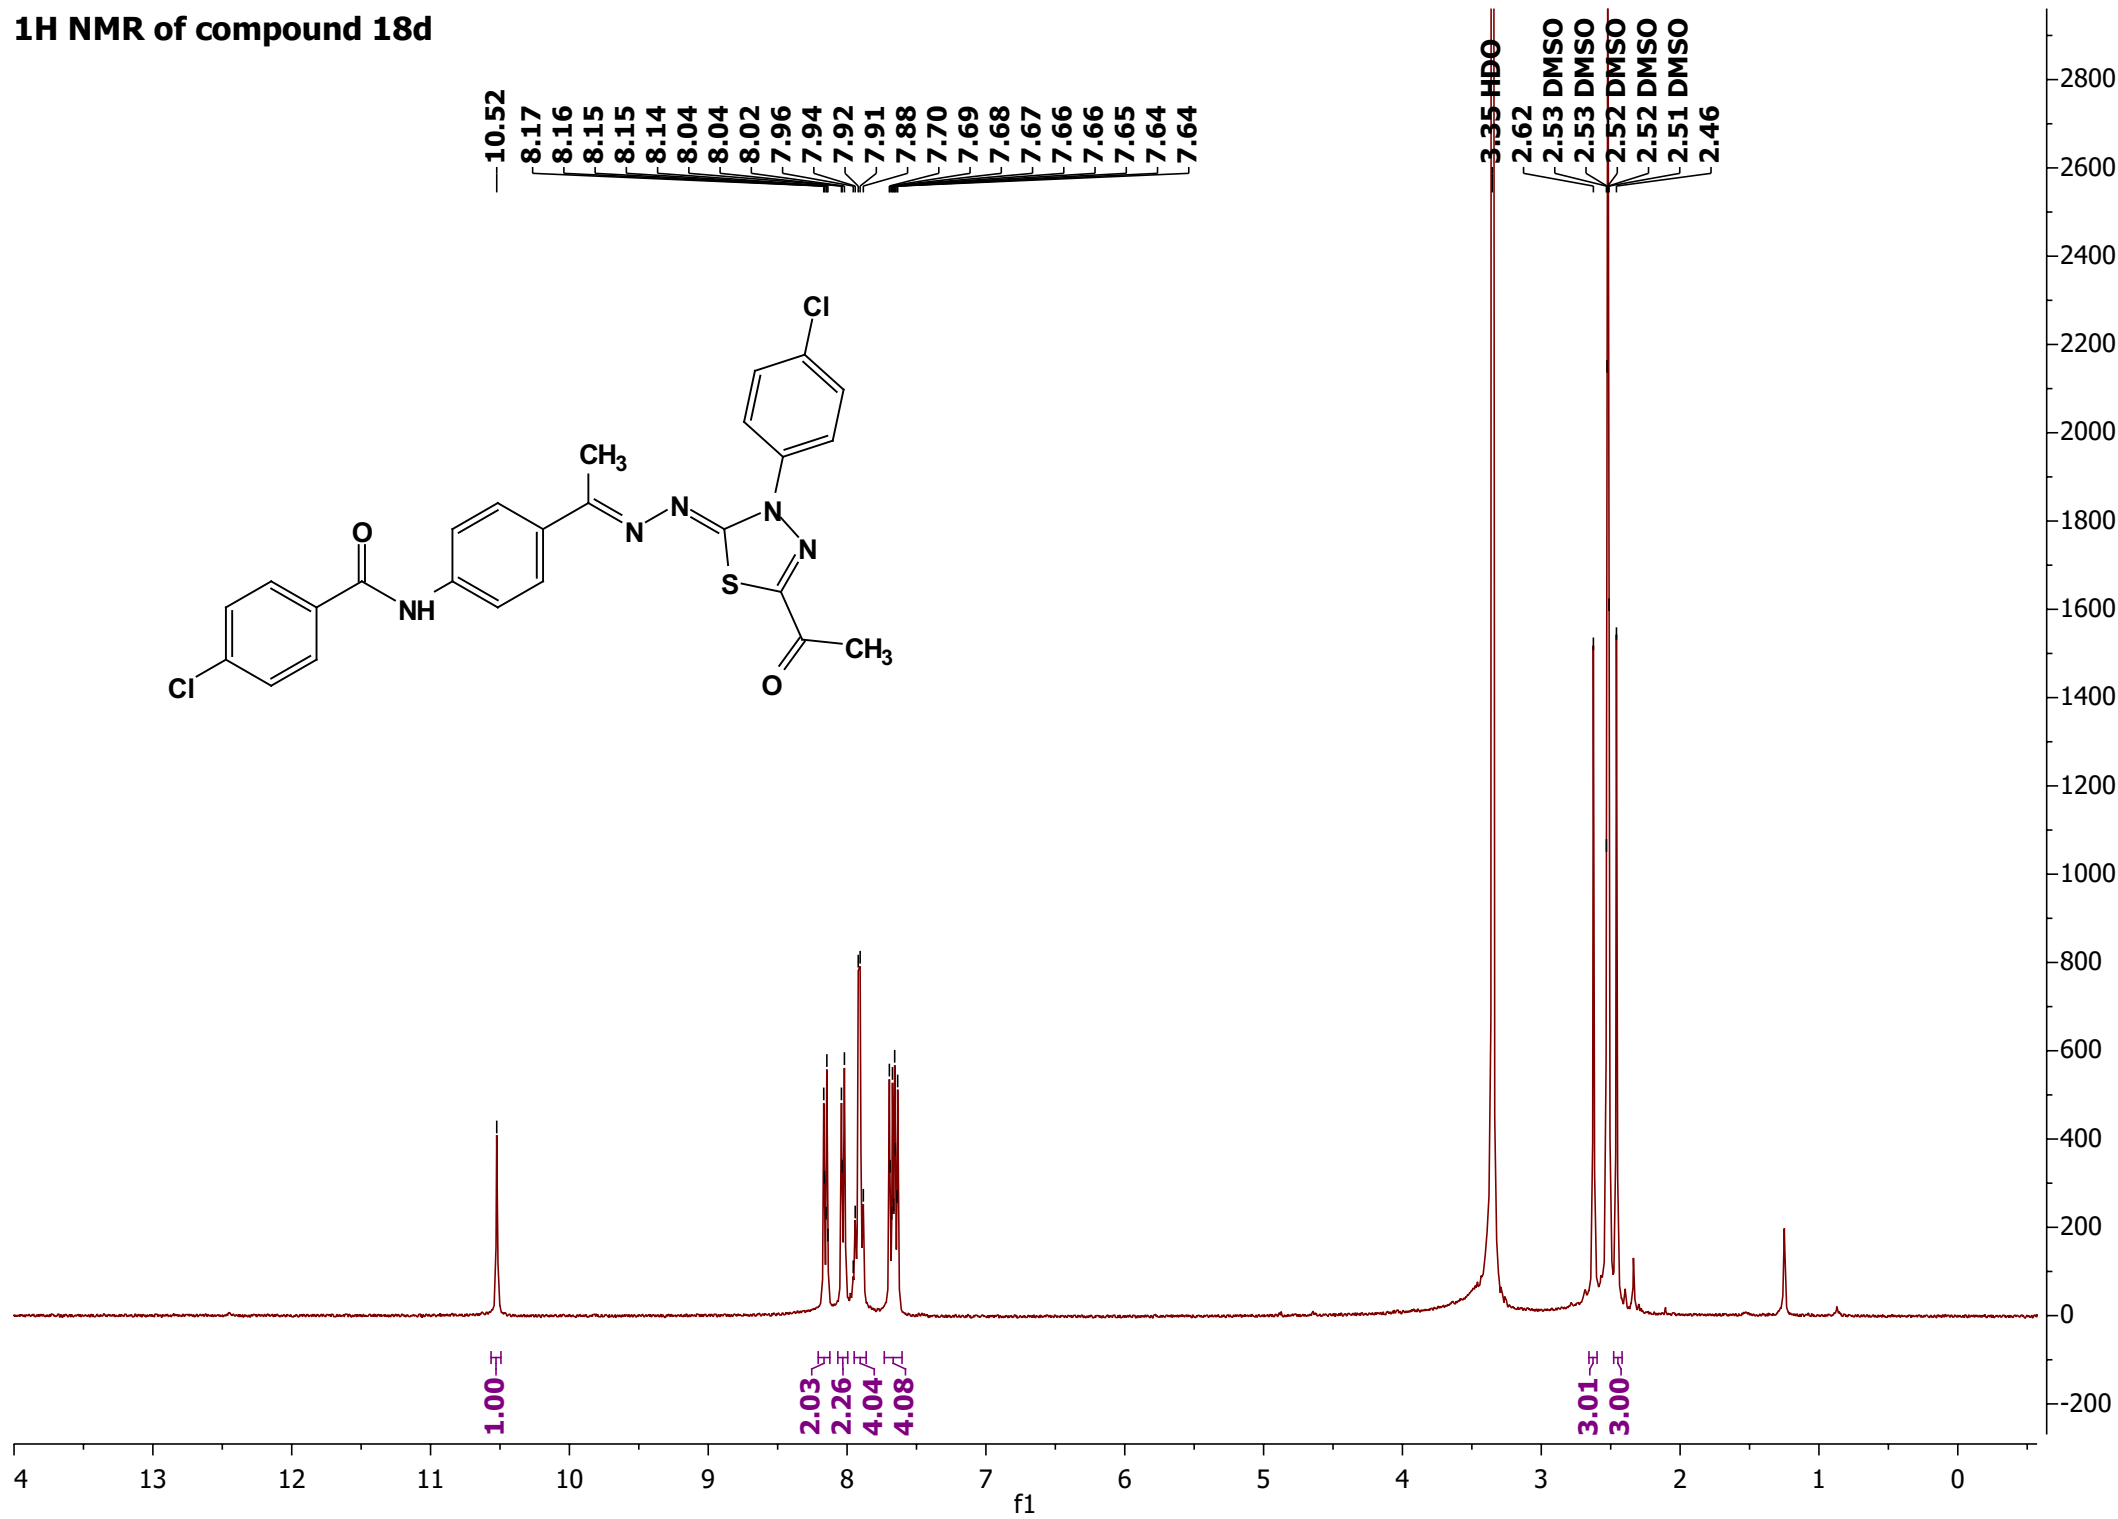

# <sup>1</sup>H NMR of compound 18d

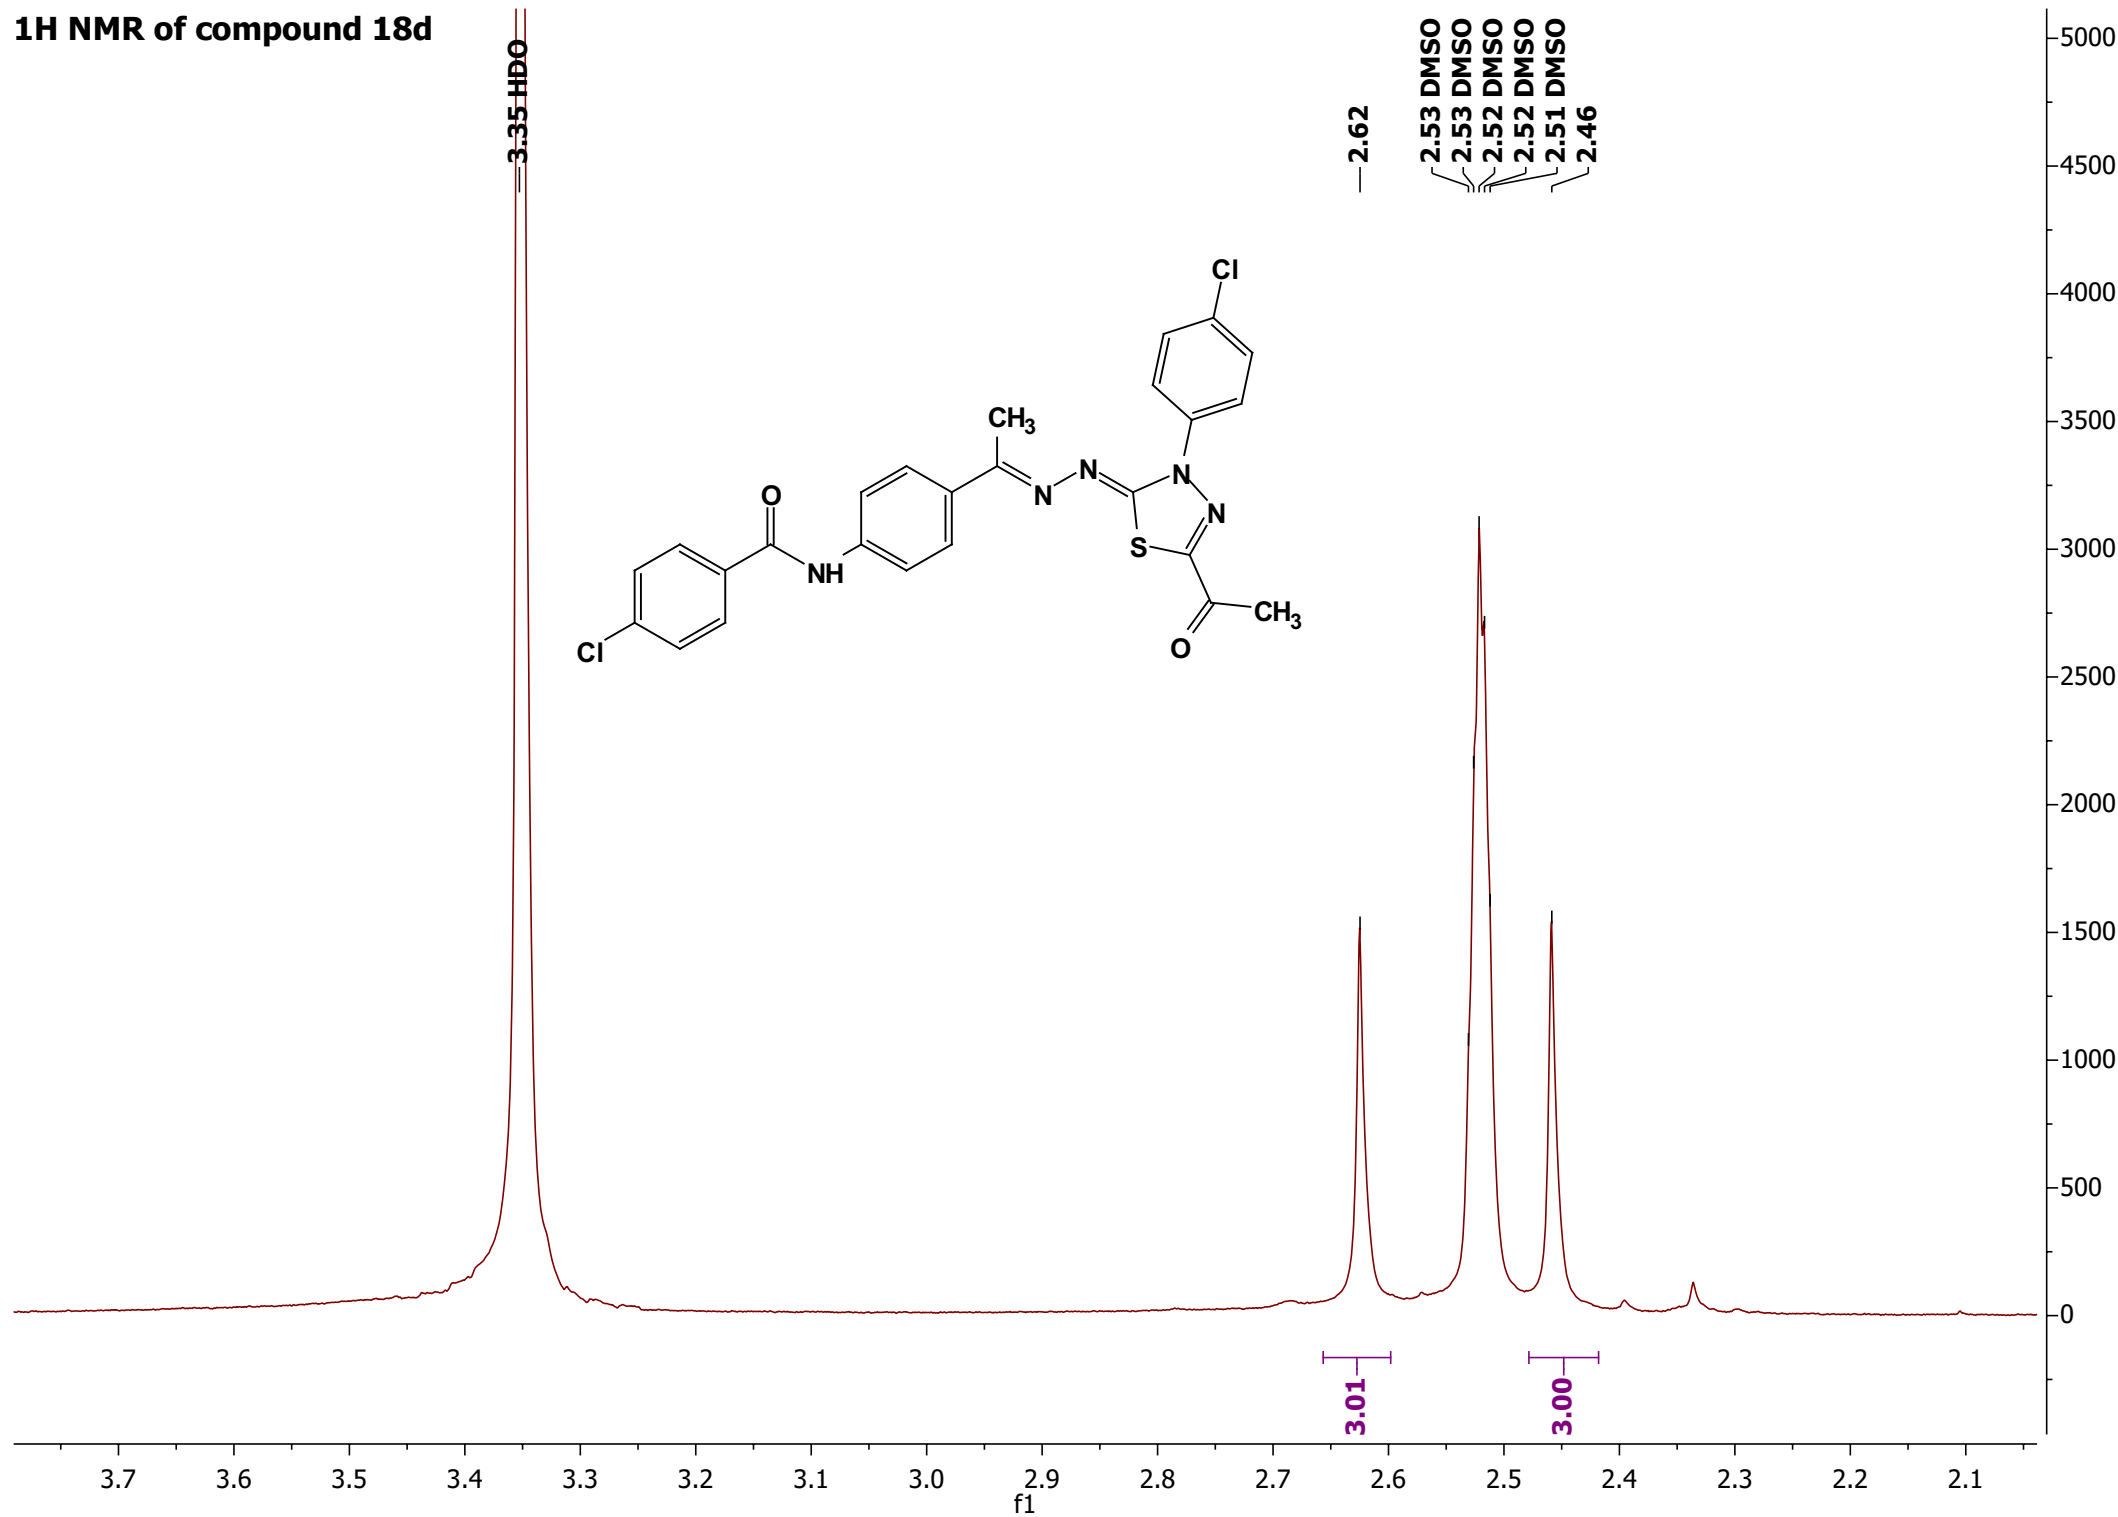

# <sup>1</sup>H NMR of compound 18d



8.17 8.16 8.15 8.15 8.14 8.04 8.04 8.02 7.96 7.94 7.92 7.91 7.88 7.70 7.69 7.68 7.67 7.66 7.66 7.65 7.64 7.64

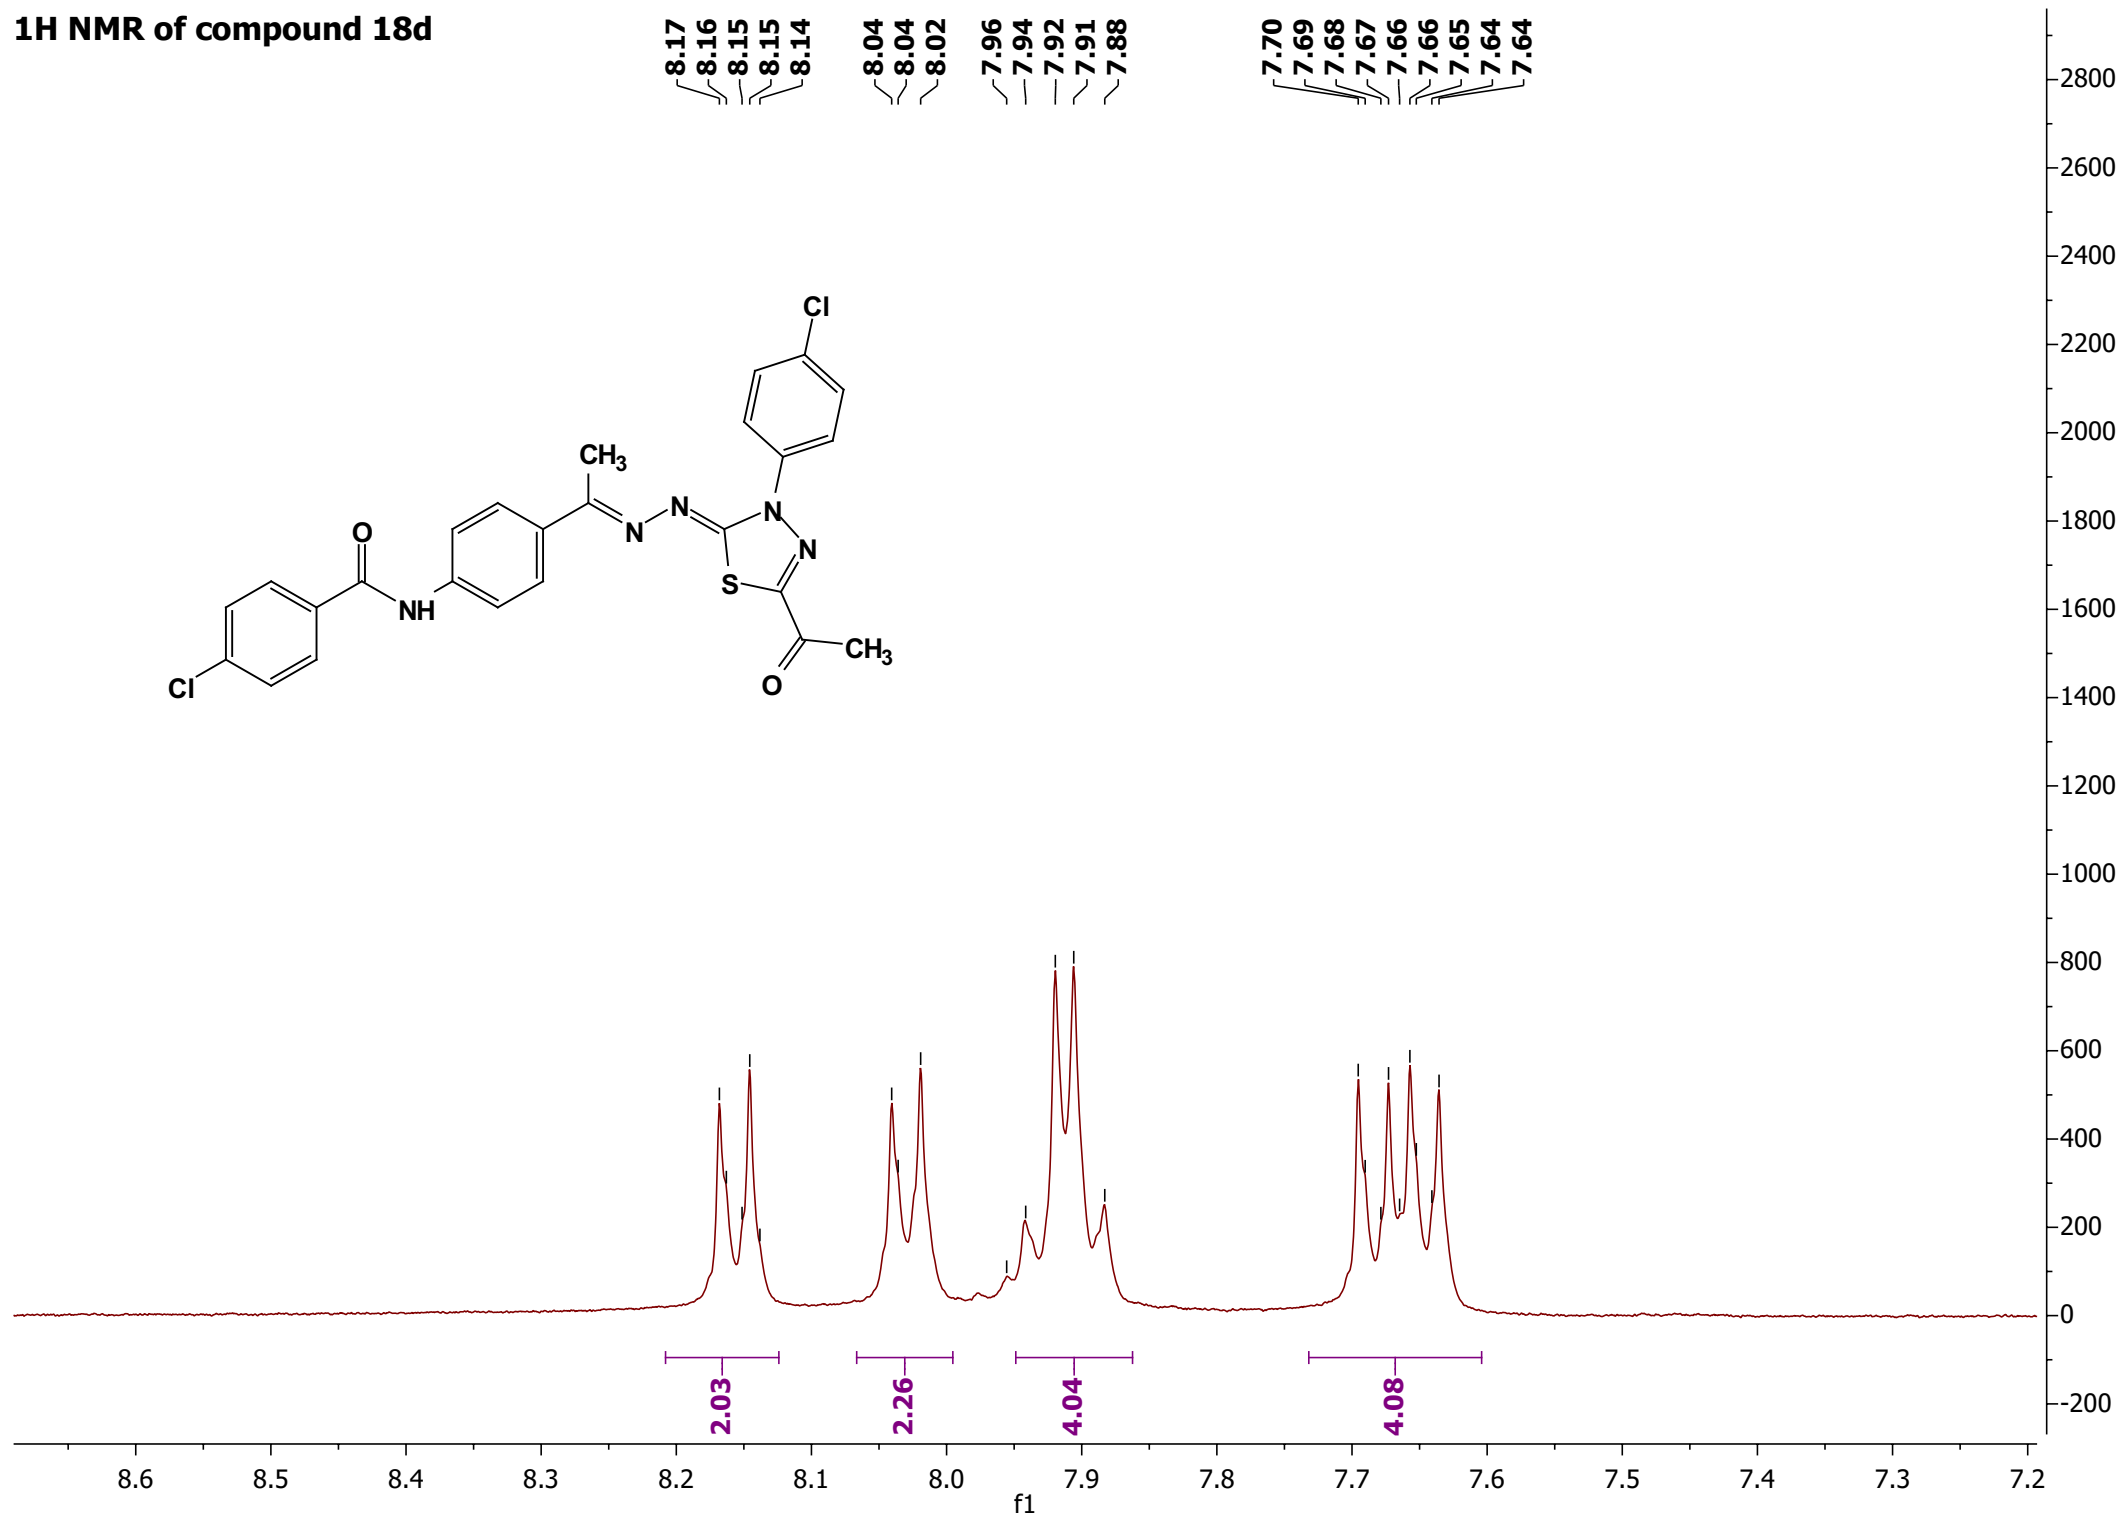

# <sup>13</sup>C NMR of compound 18d

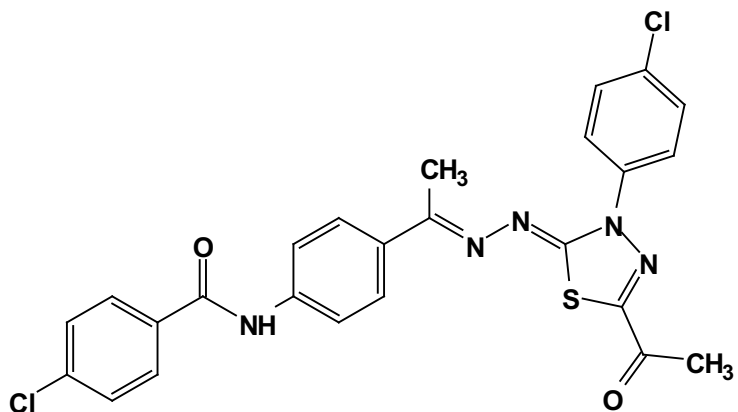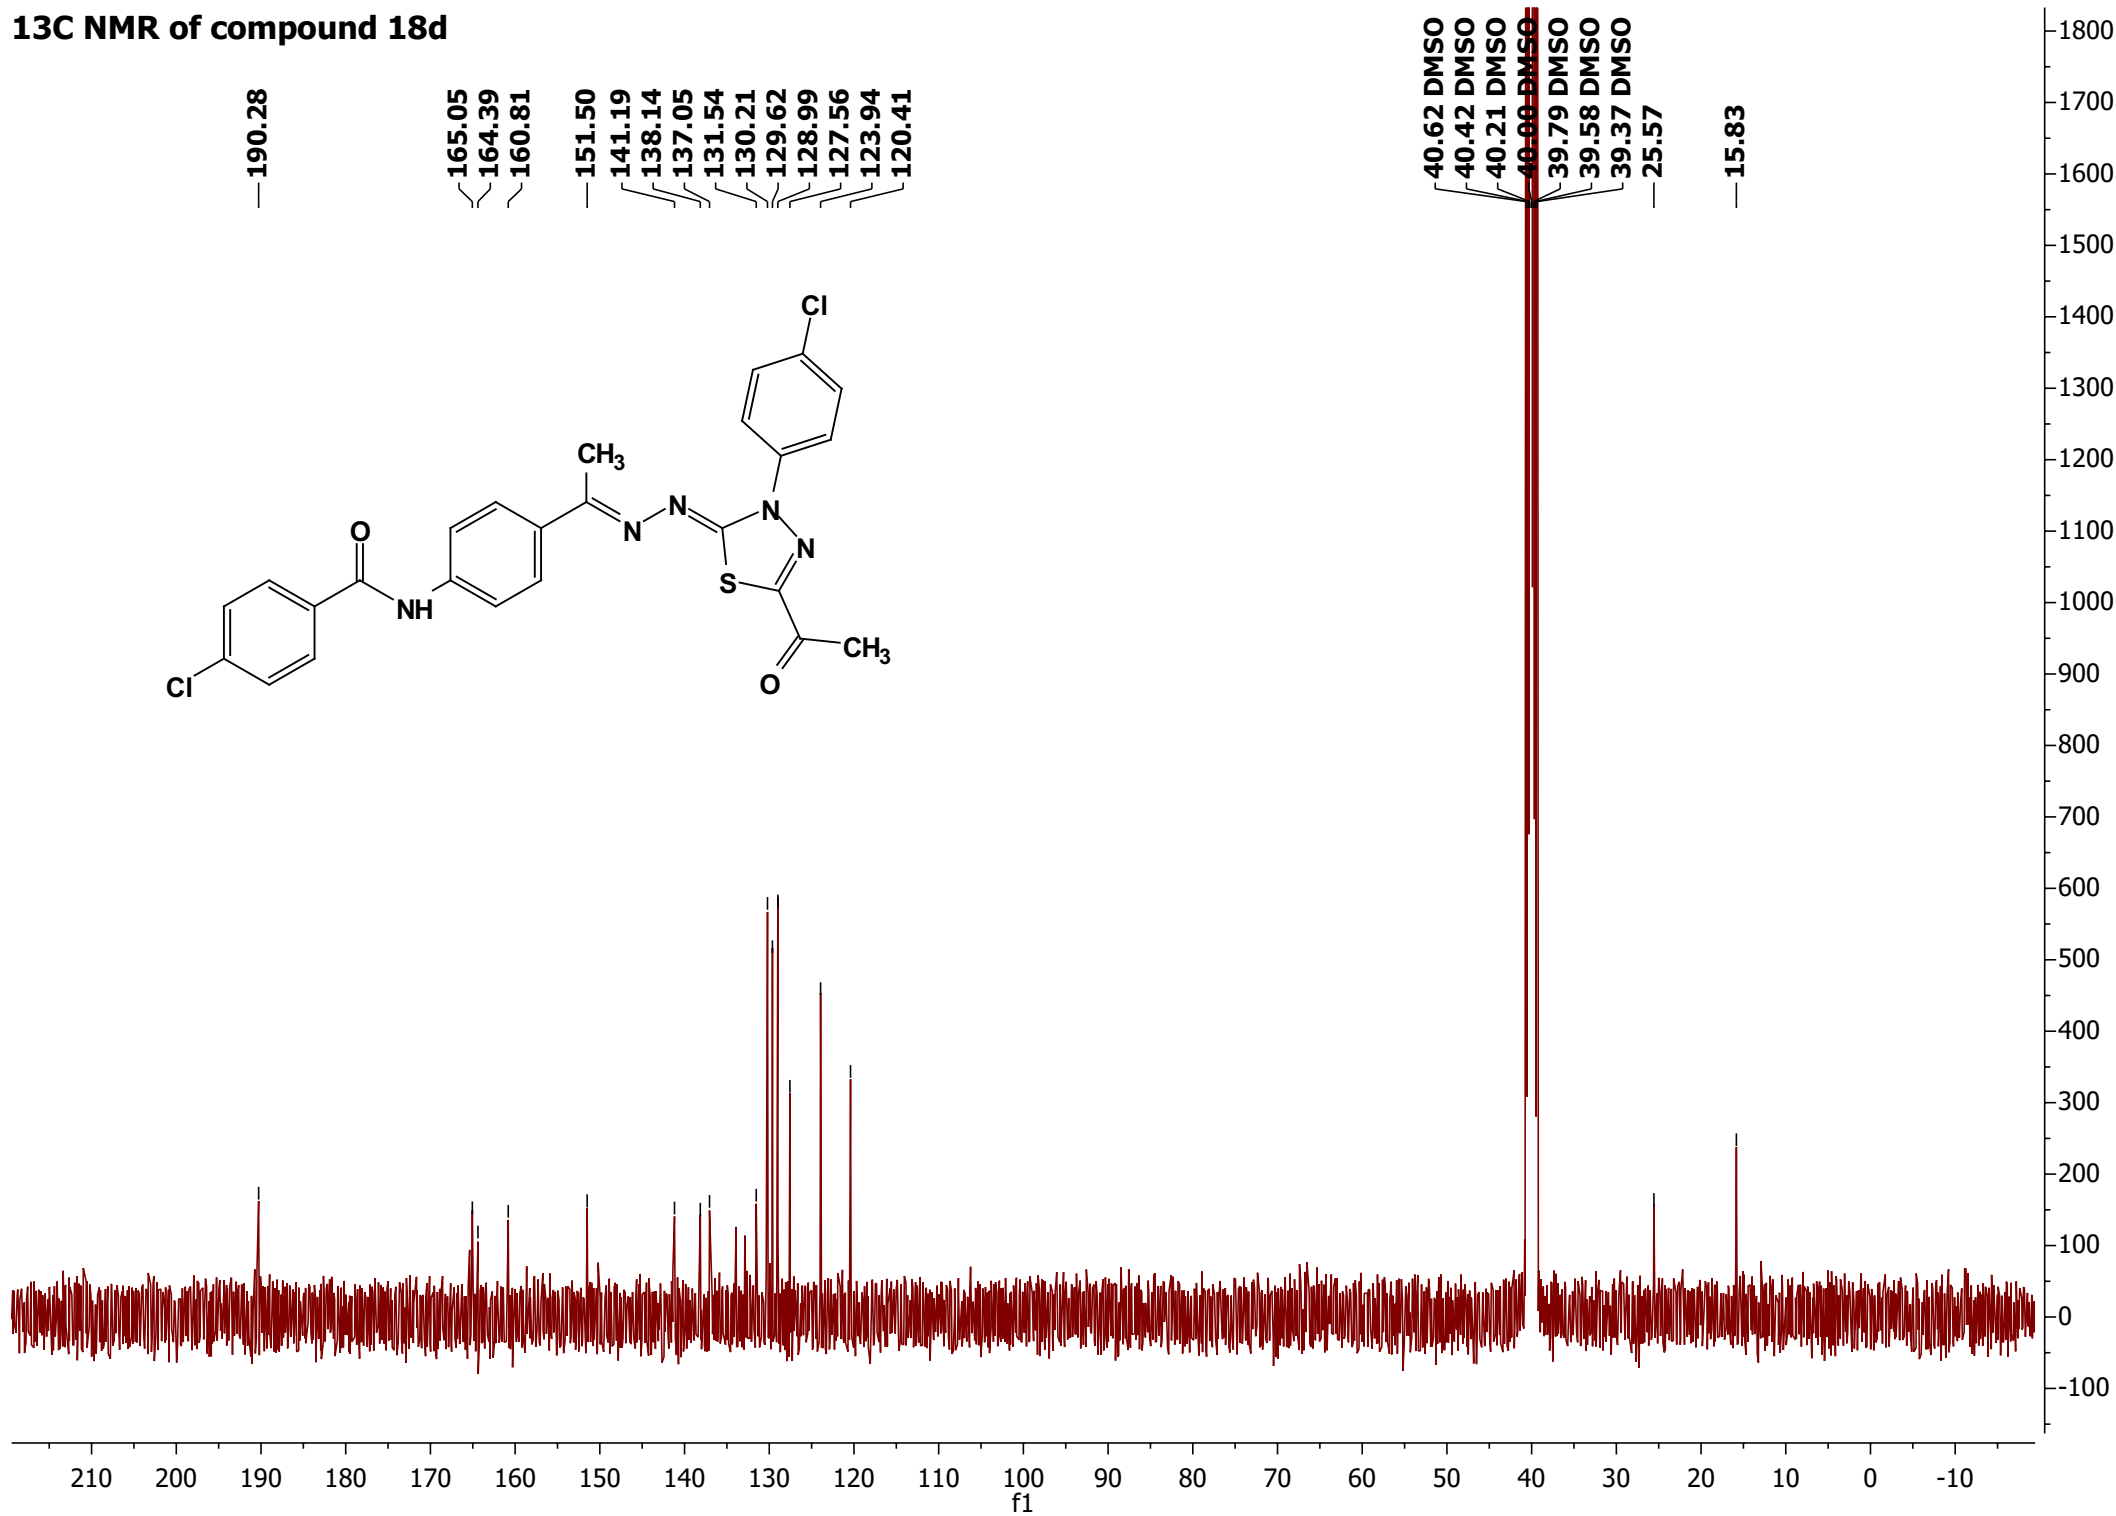

# <sup>13</sup>C NMR of compound 18d

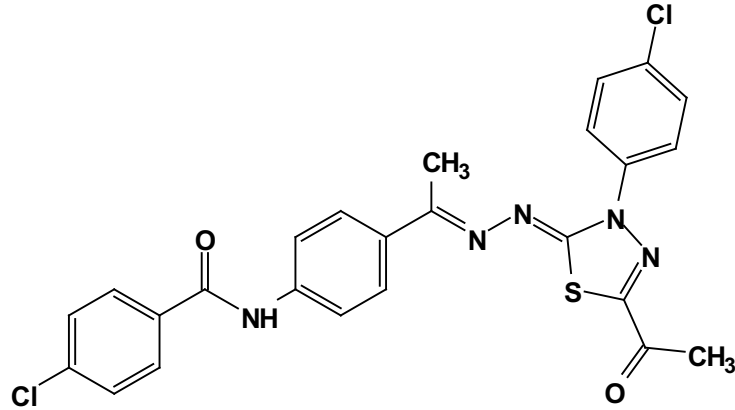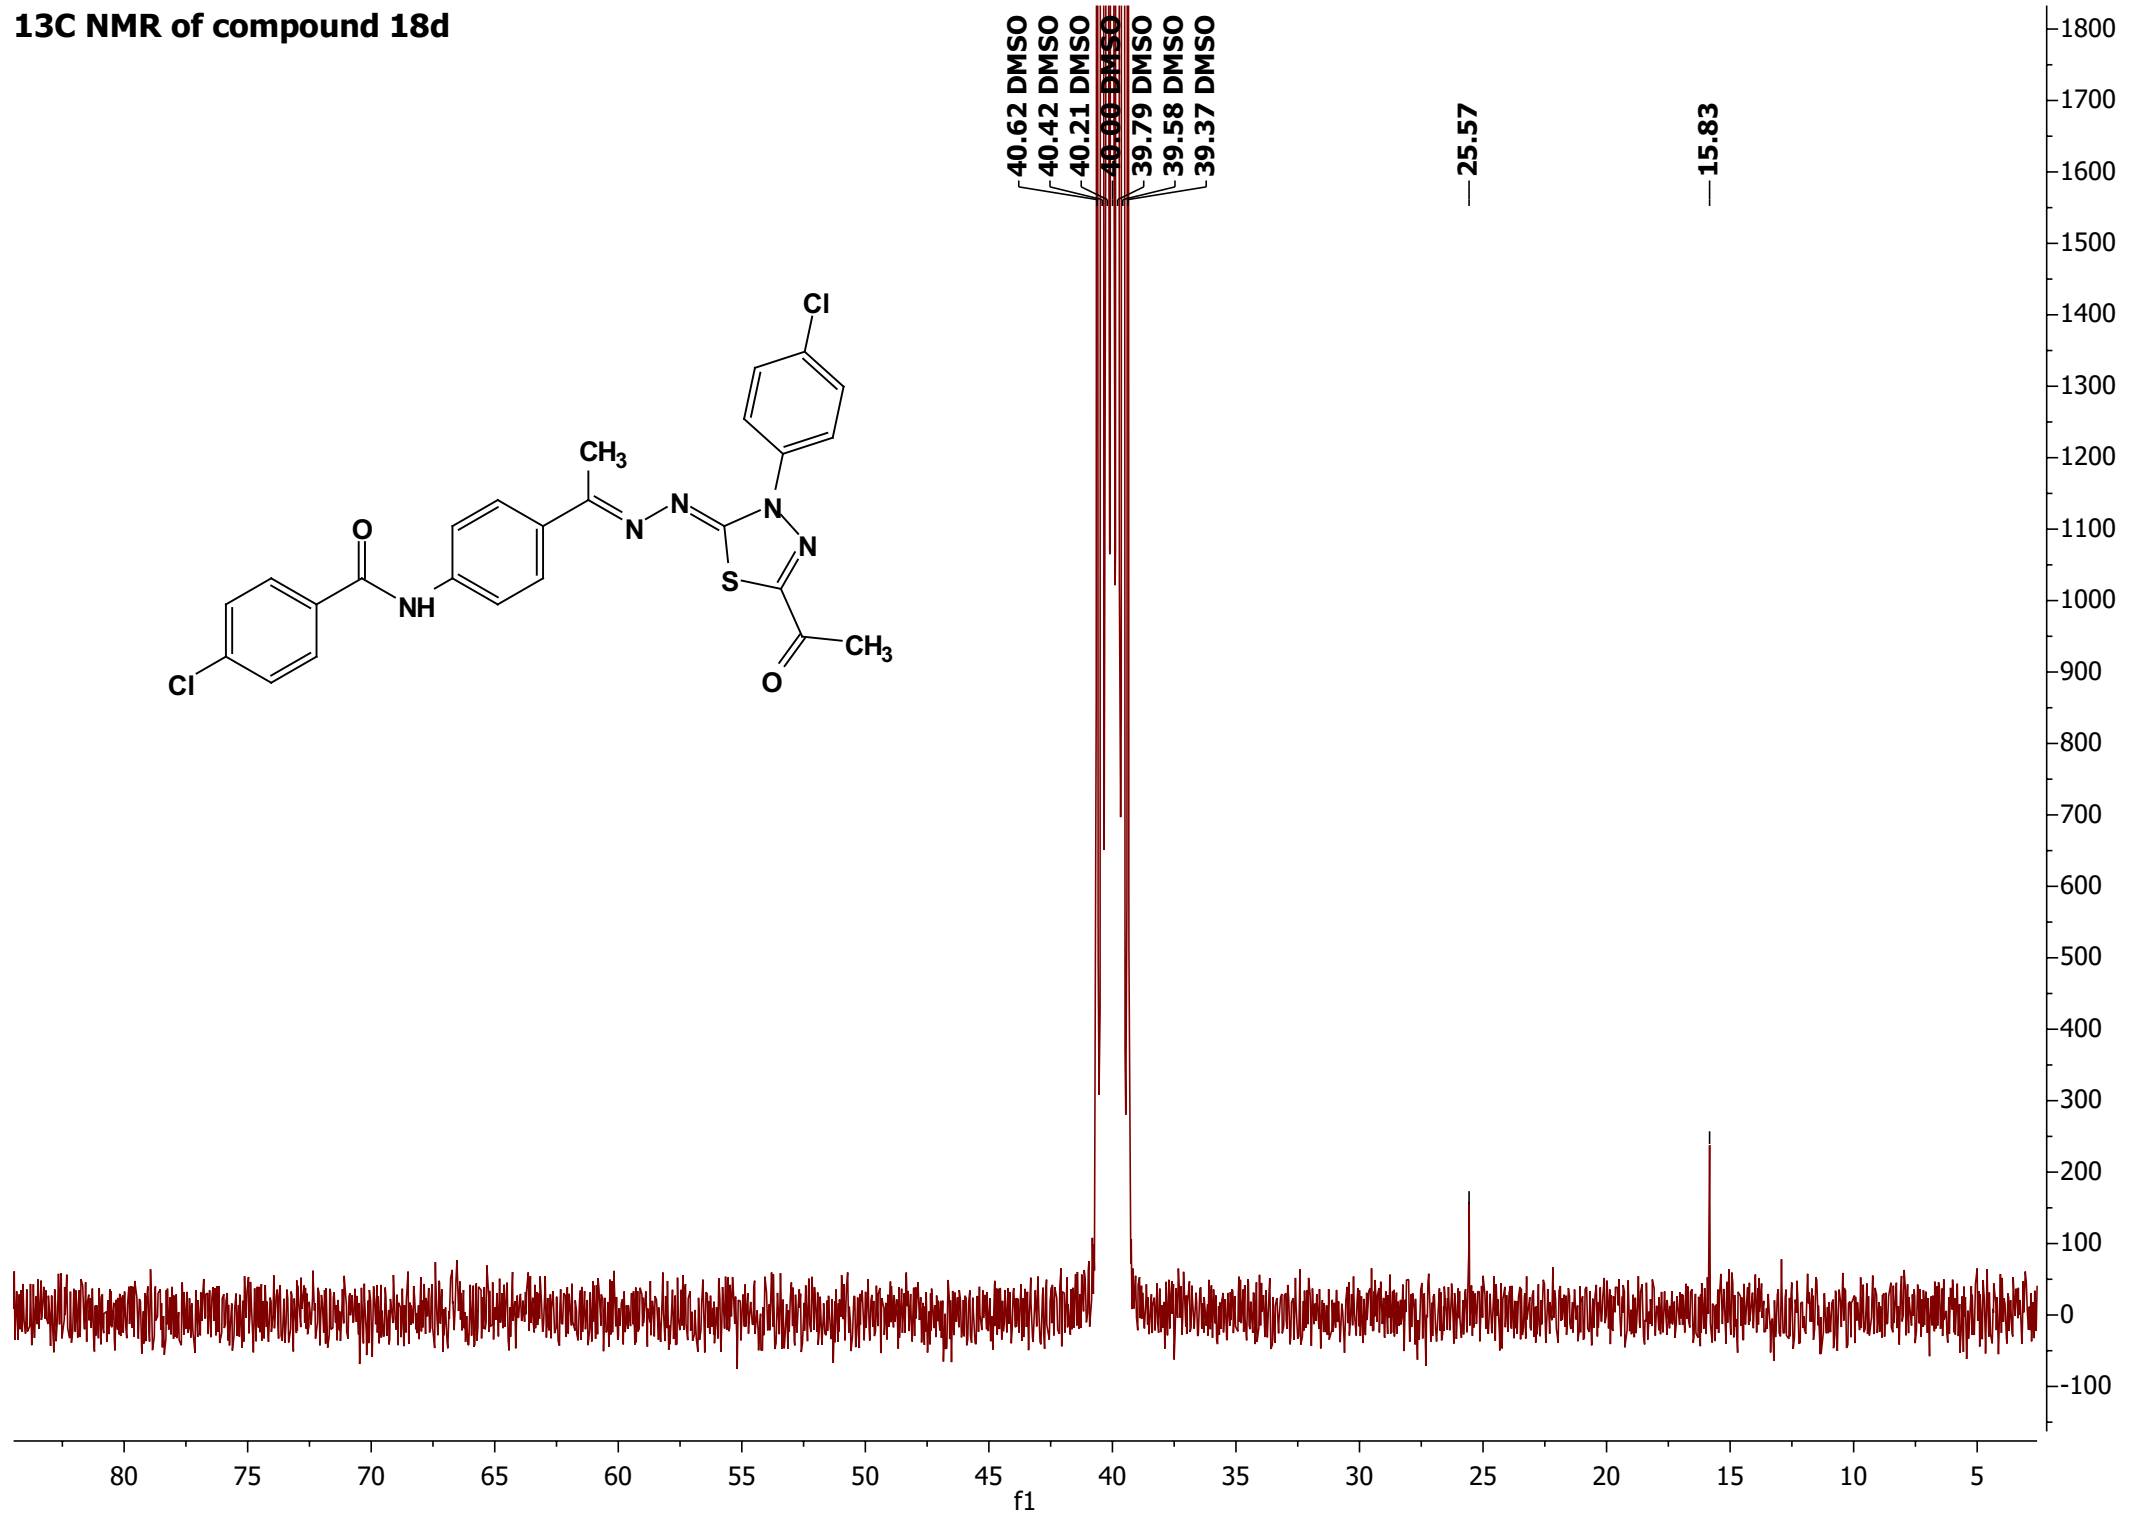

# <sup>13</sup>C NMR of compound 18d

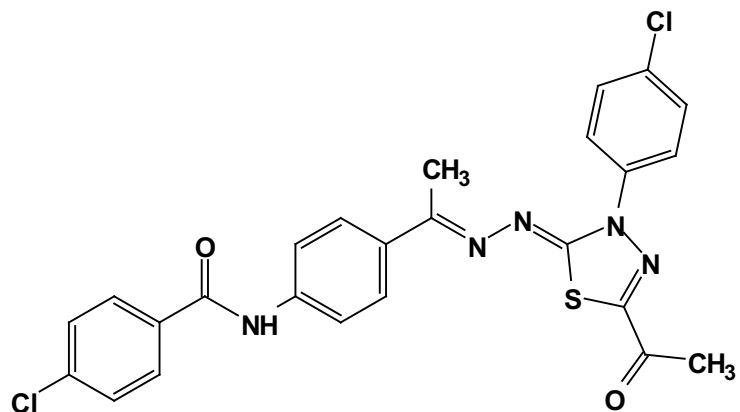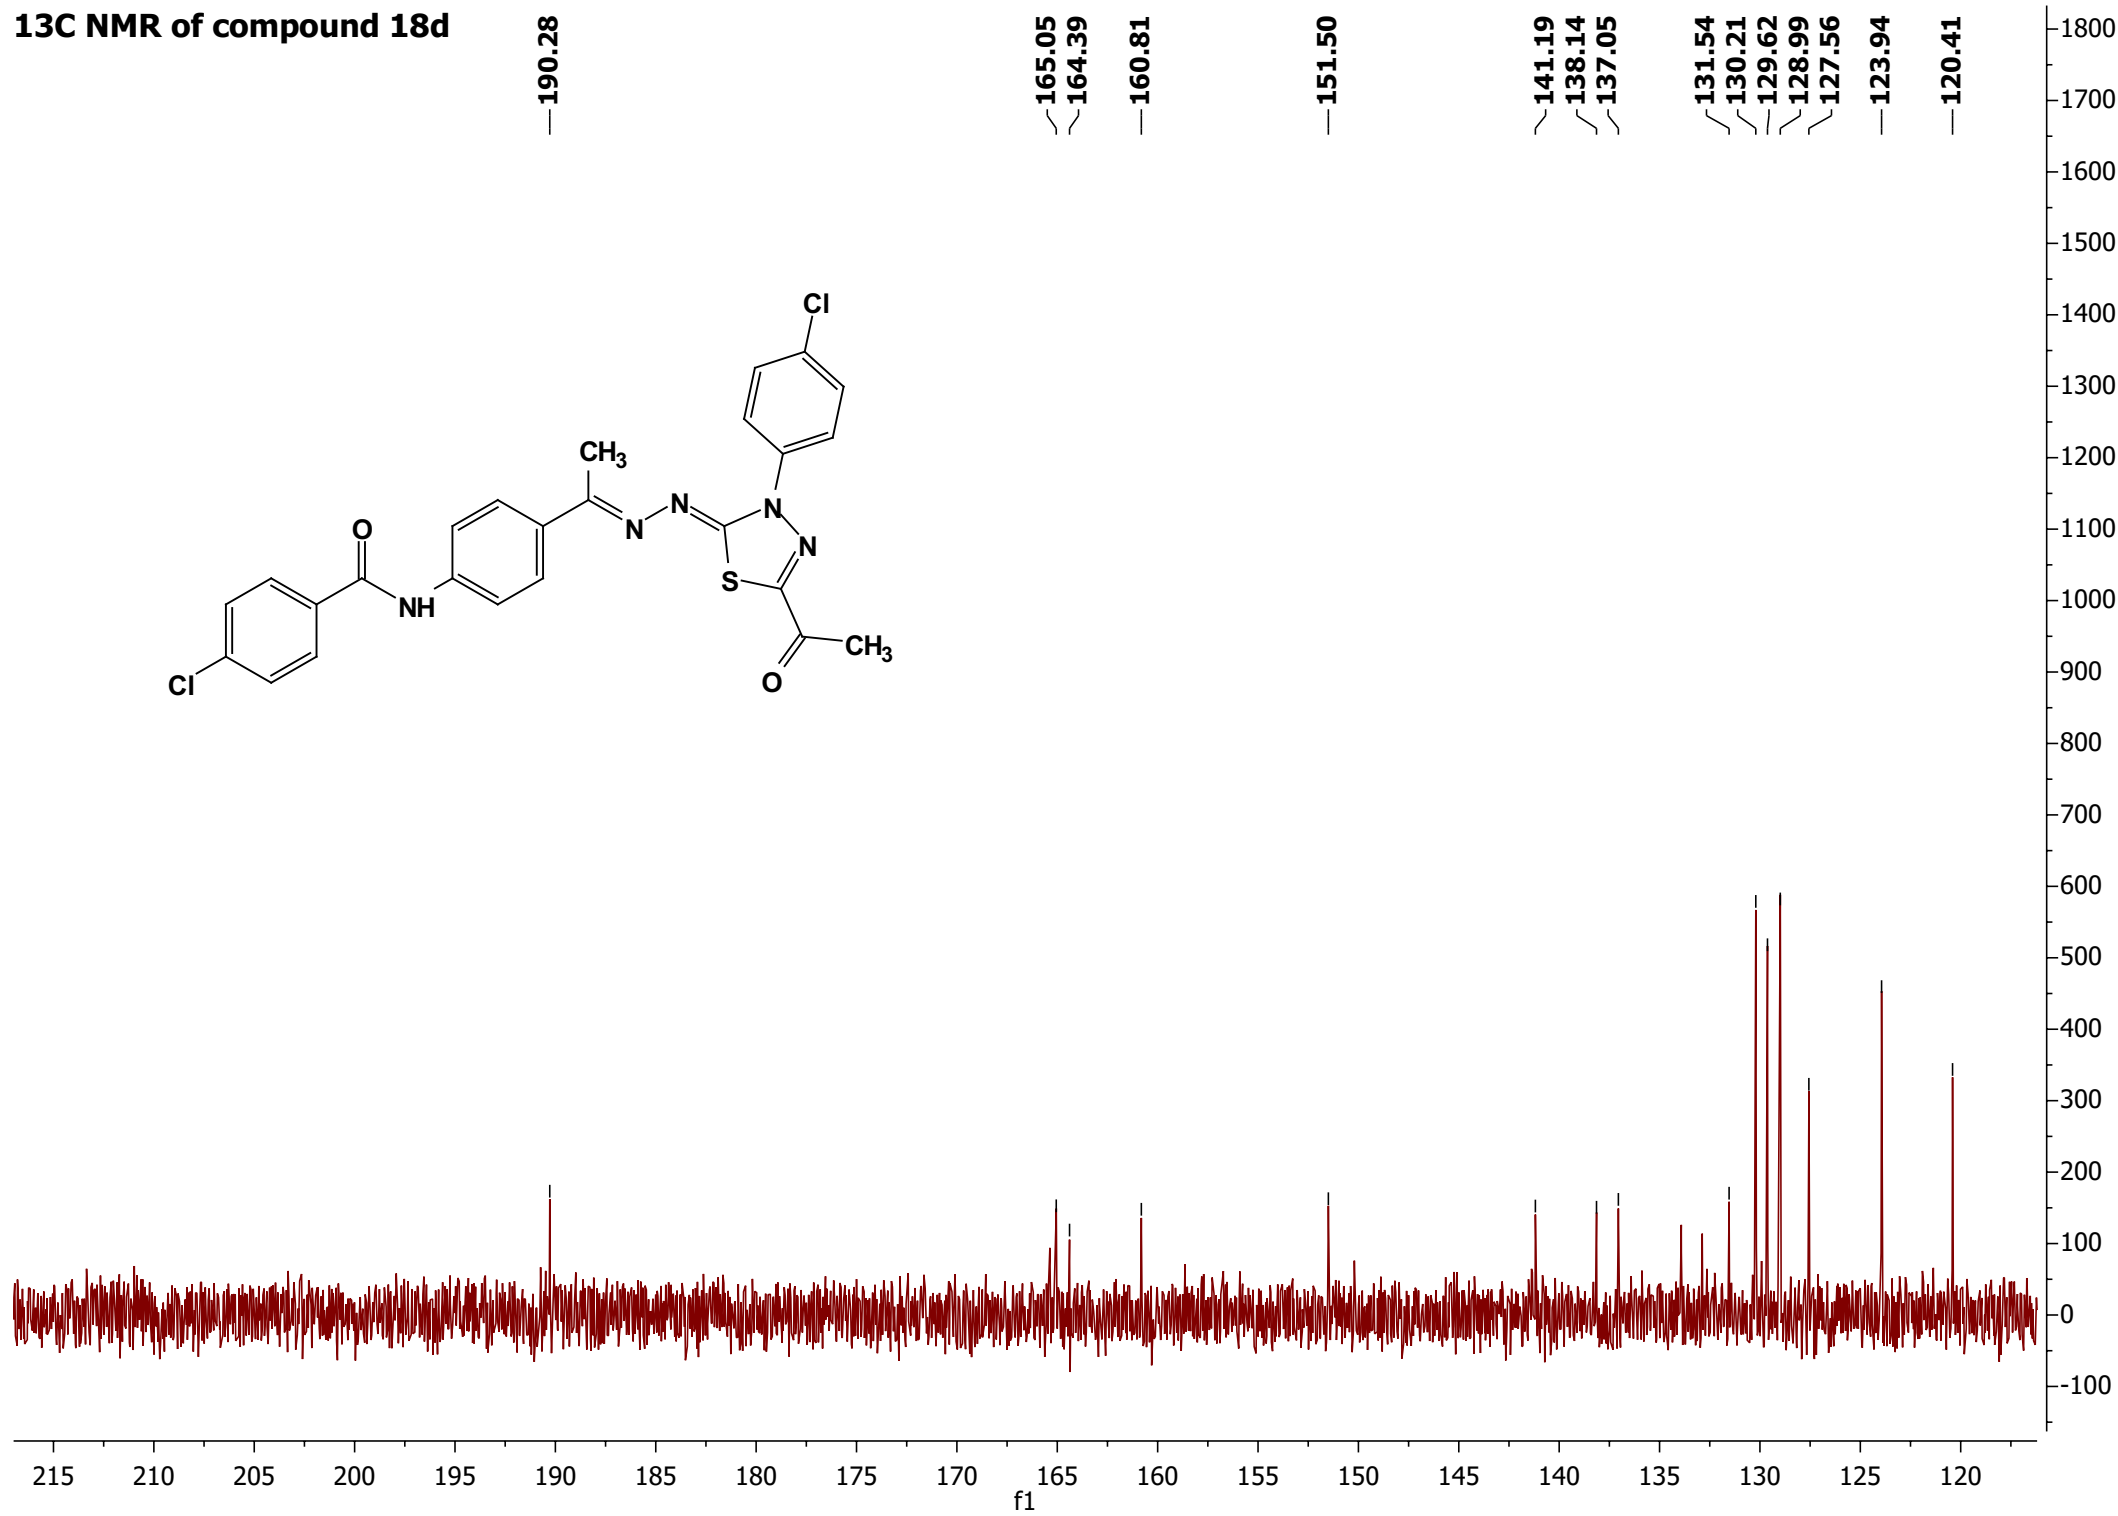

# Mass spec. of compound 18d

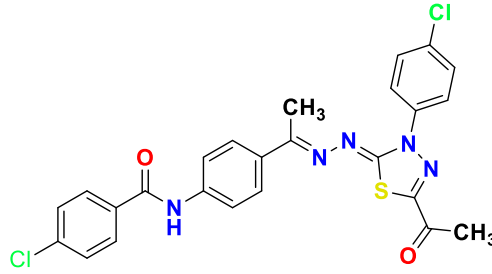

ibrahim-hassan-wc4 #119-120 RT: 2.01-2.03 AV: 2 SB: 26 1.21-1.34 , 0.87-1.14 NL: 3.05E2  
T: {0,0} + c EI Full ms [40.00-1000.00]

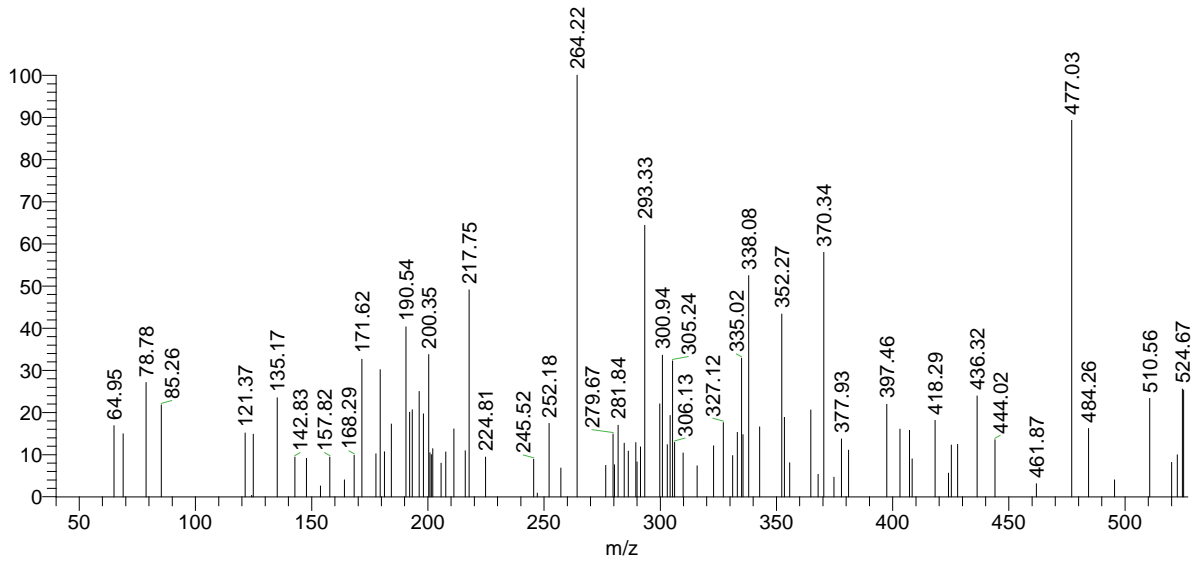

# IR of compound 18e

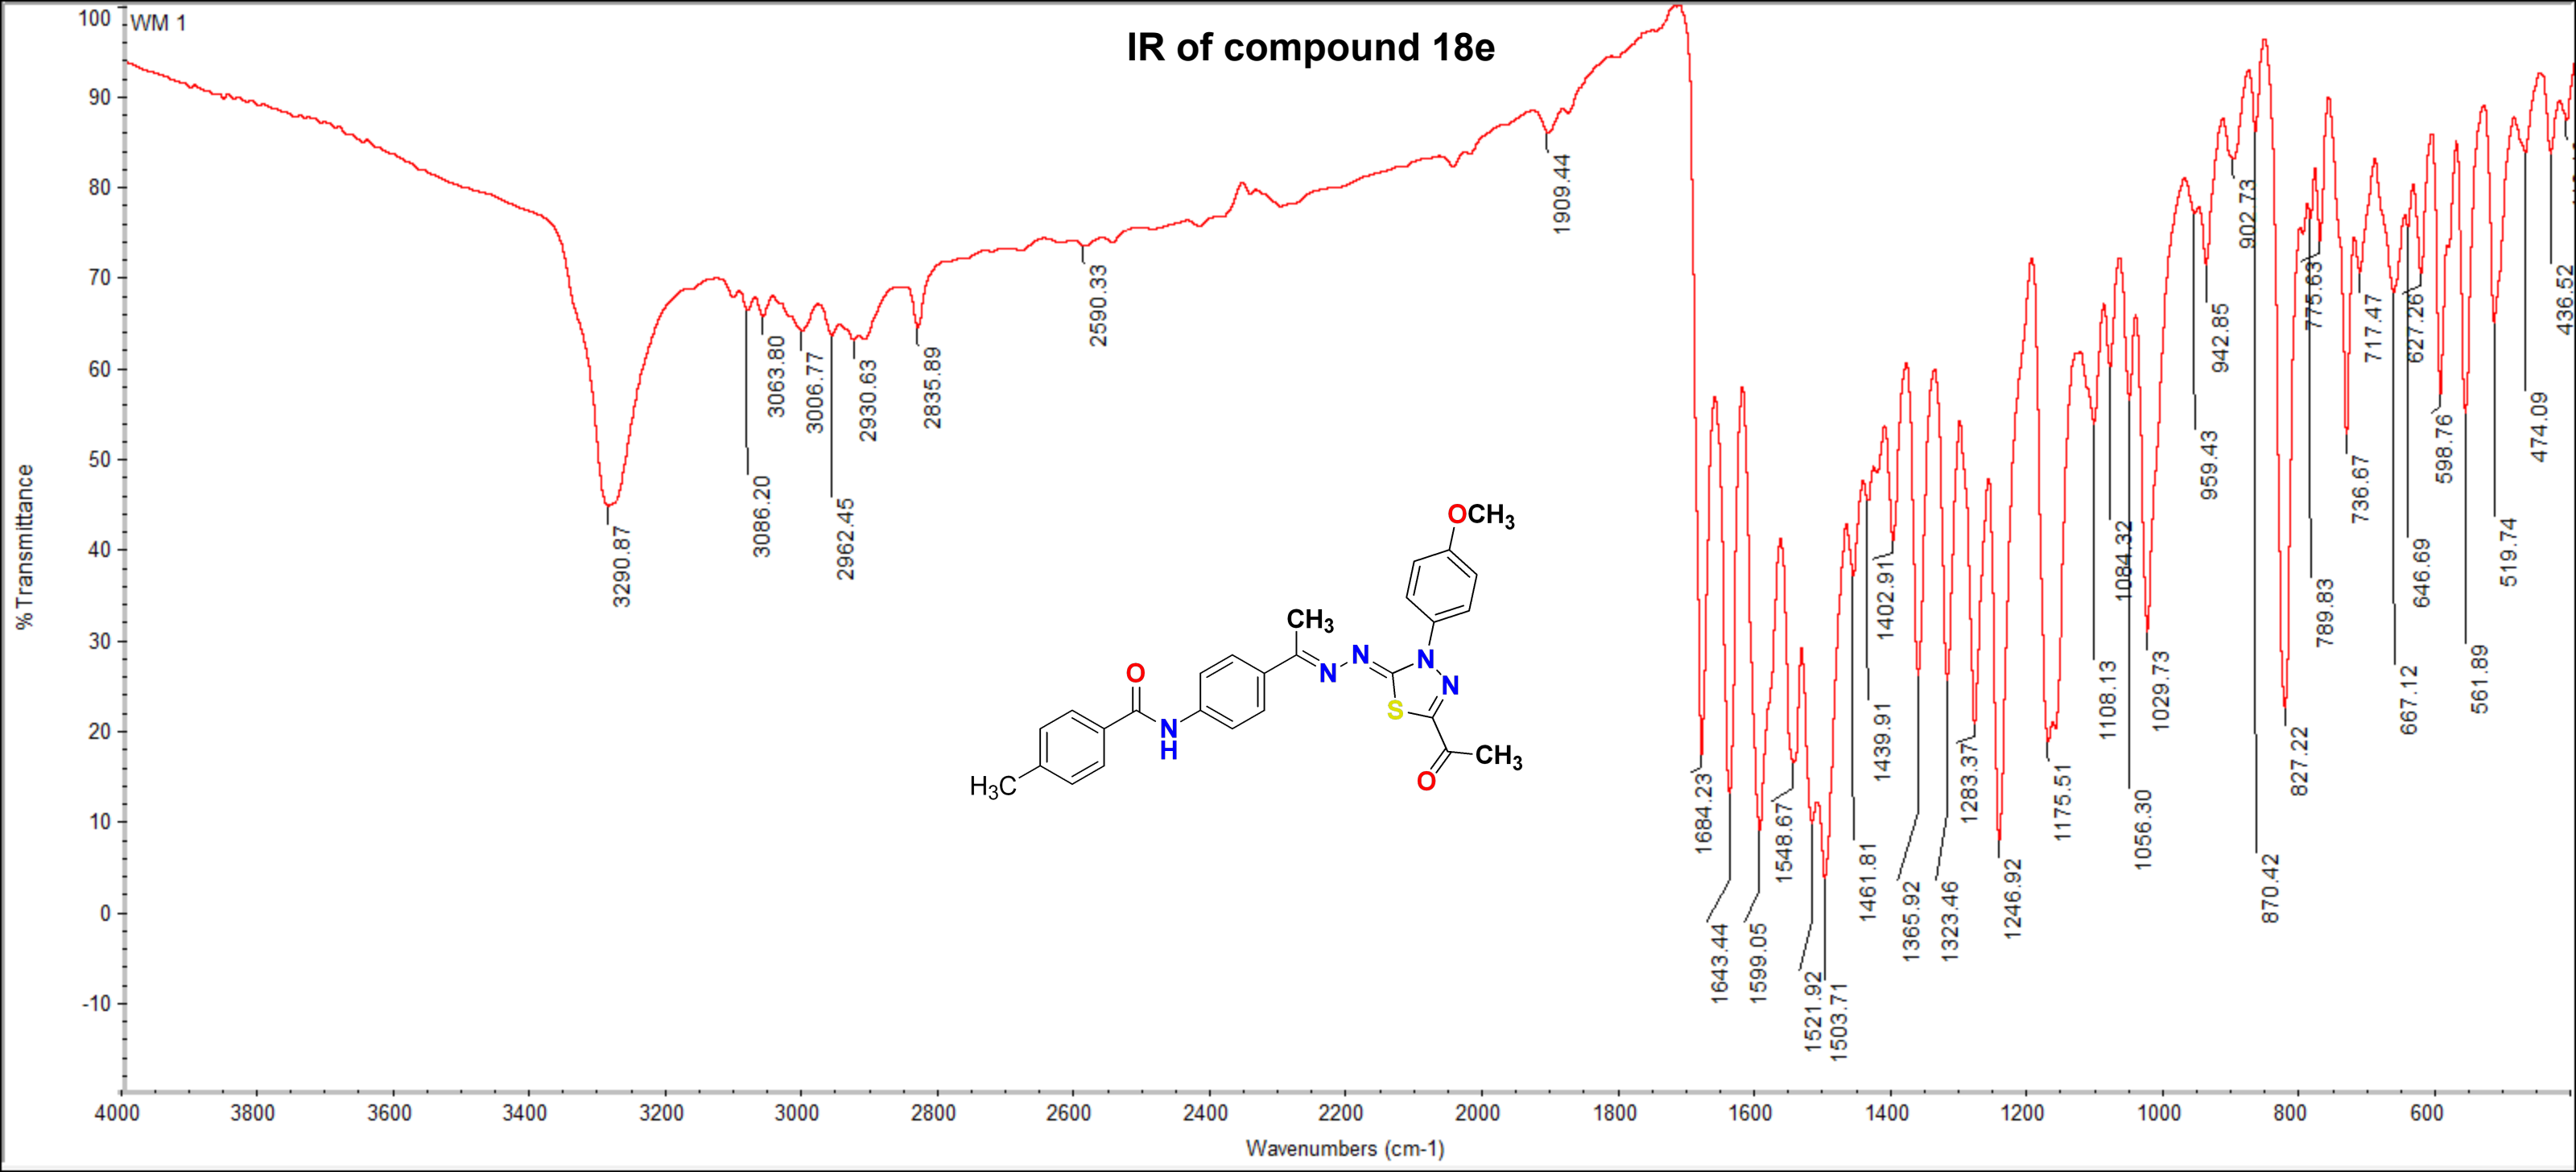



# 1H NMR of compound 18e

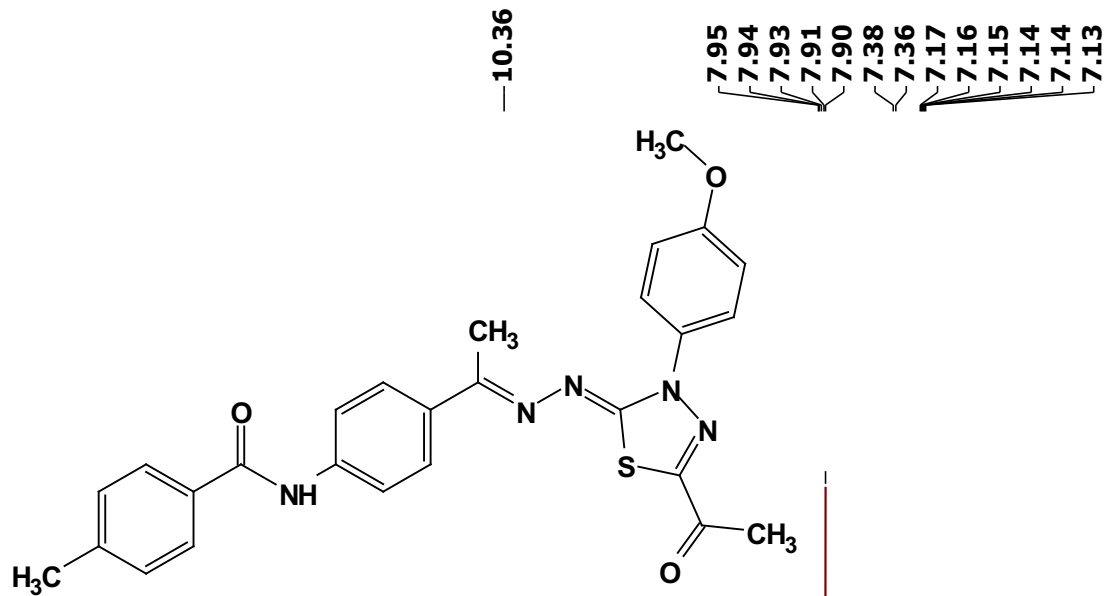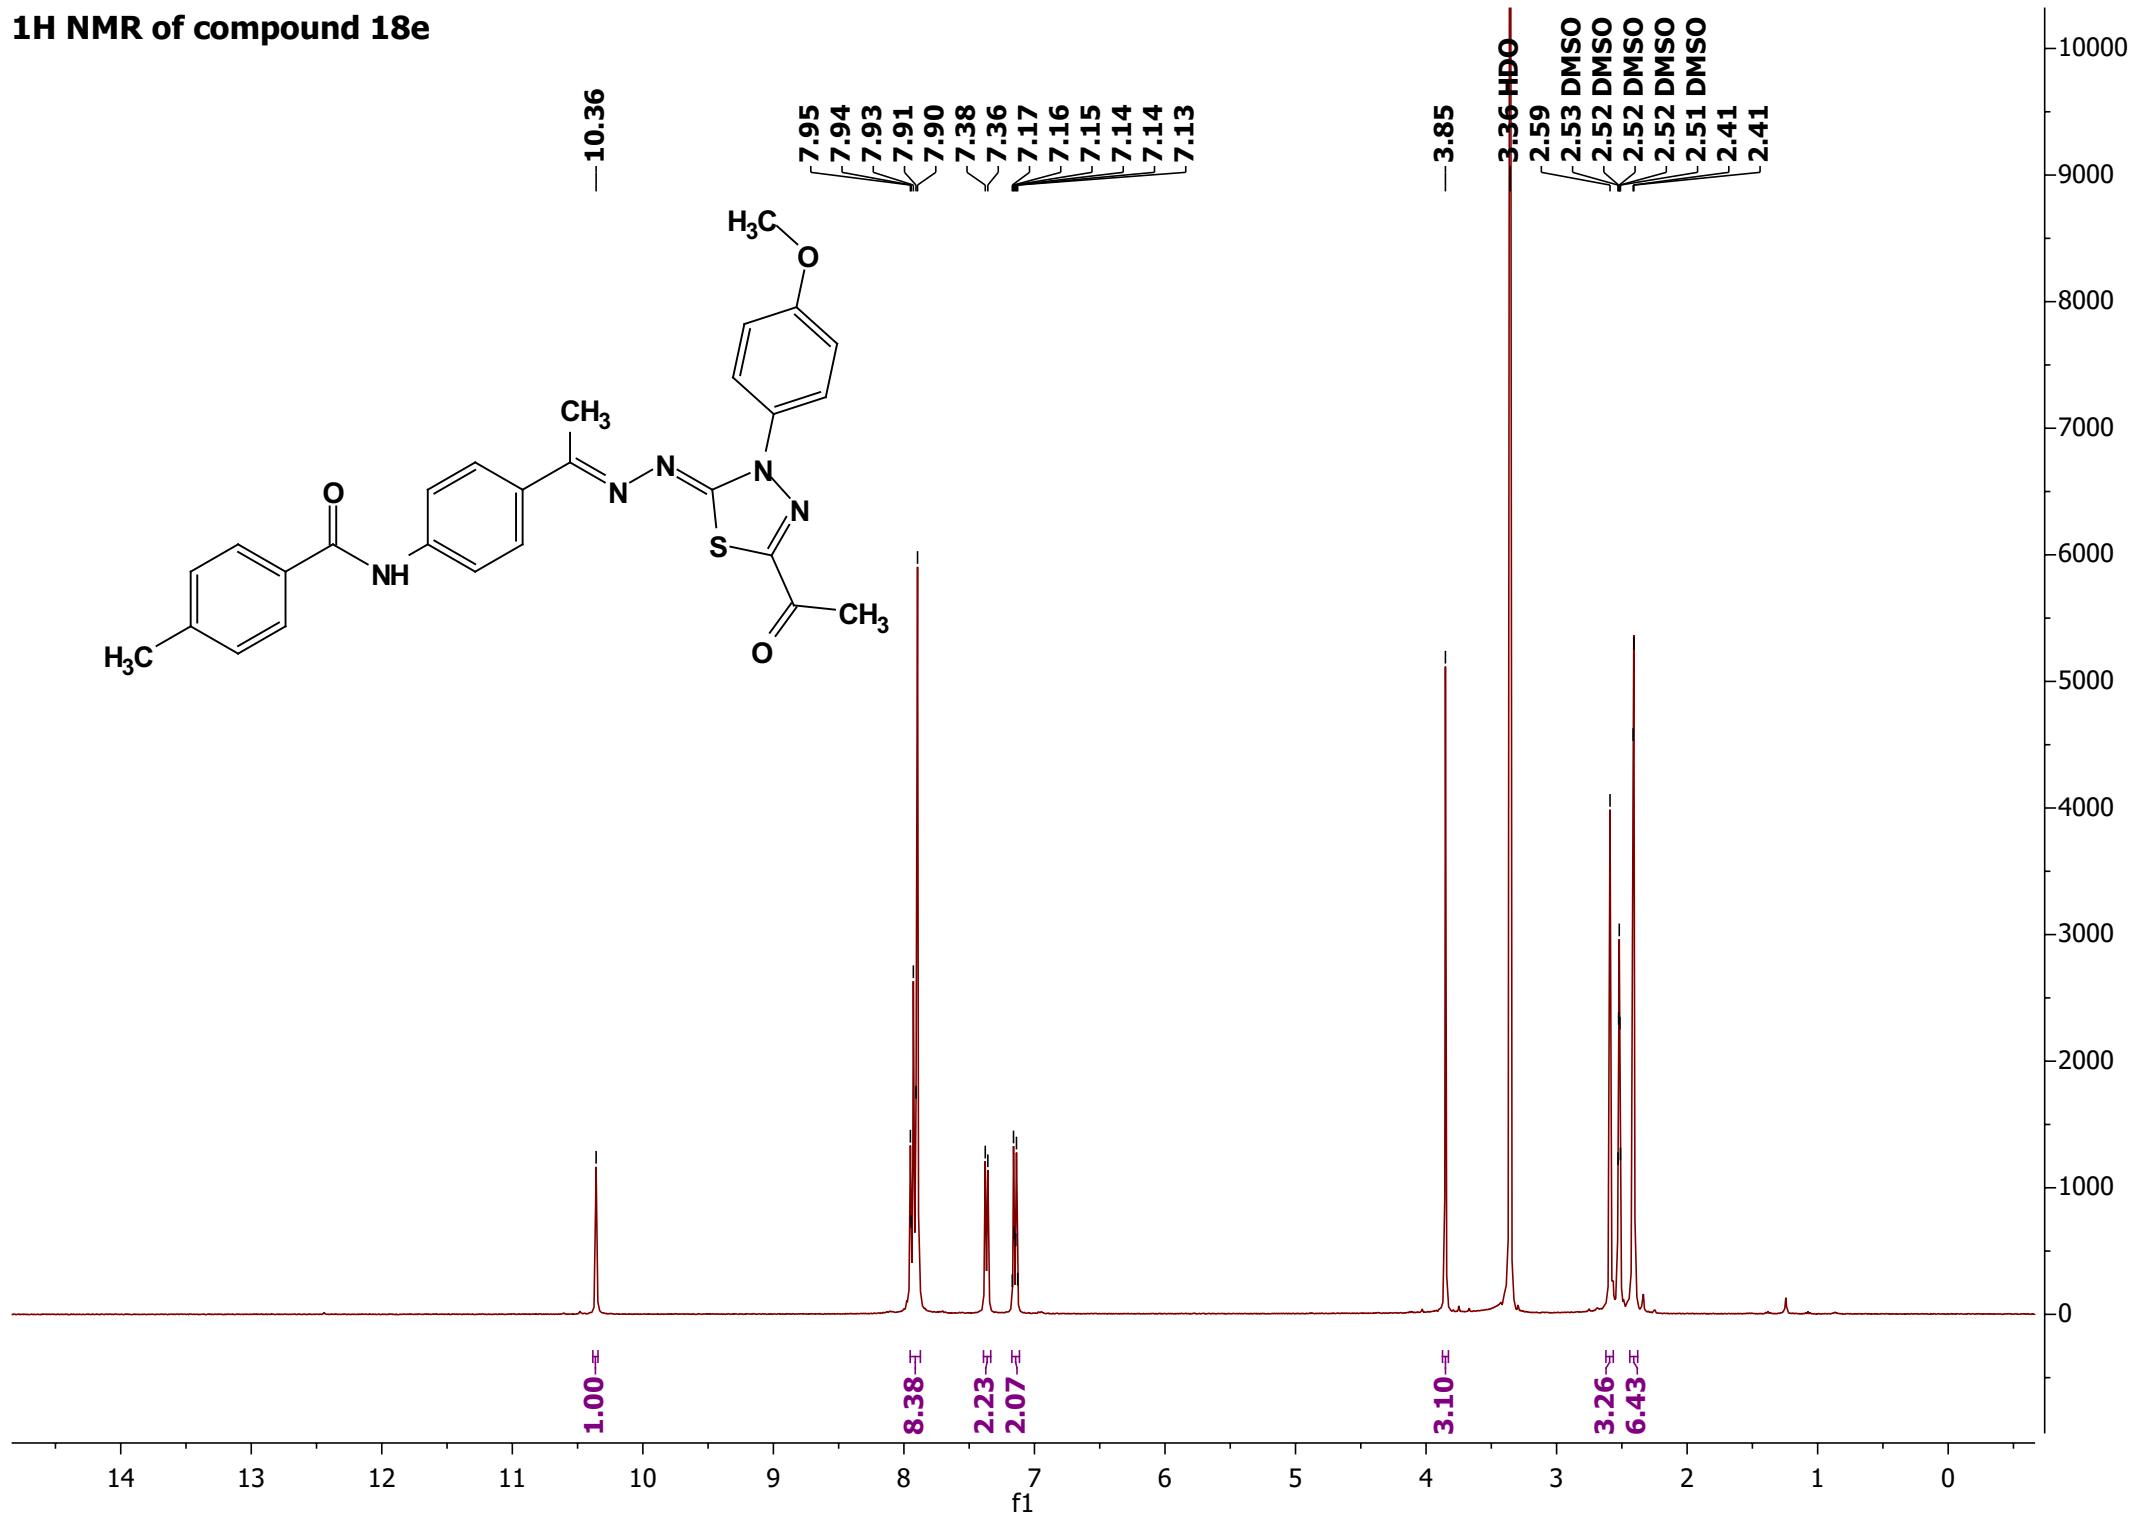

# <sup>1</sup>H NMR of compound 18e

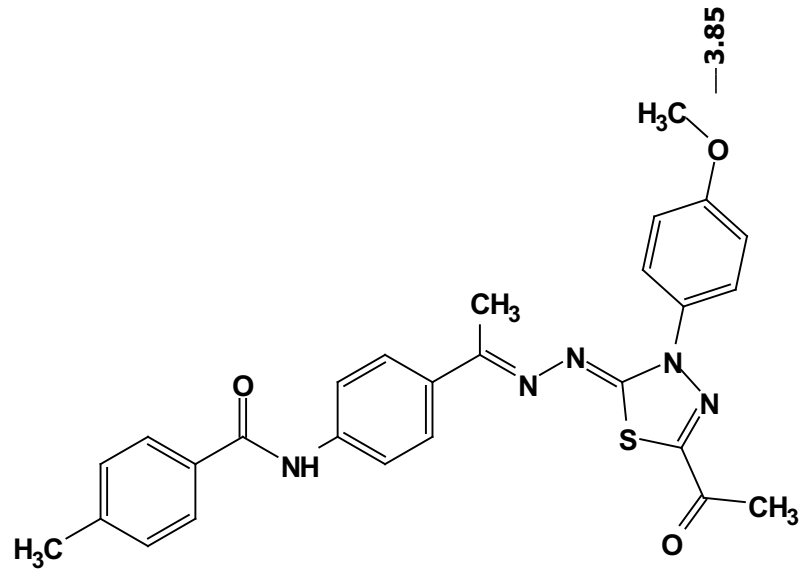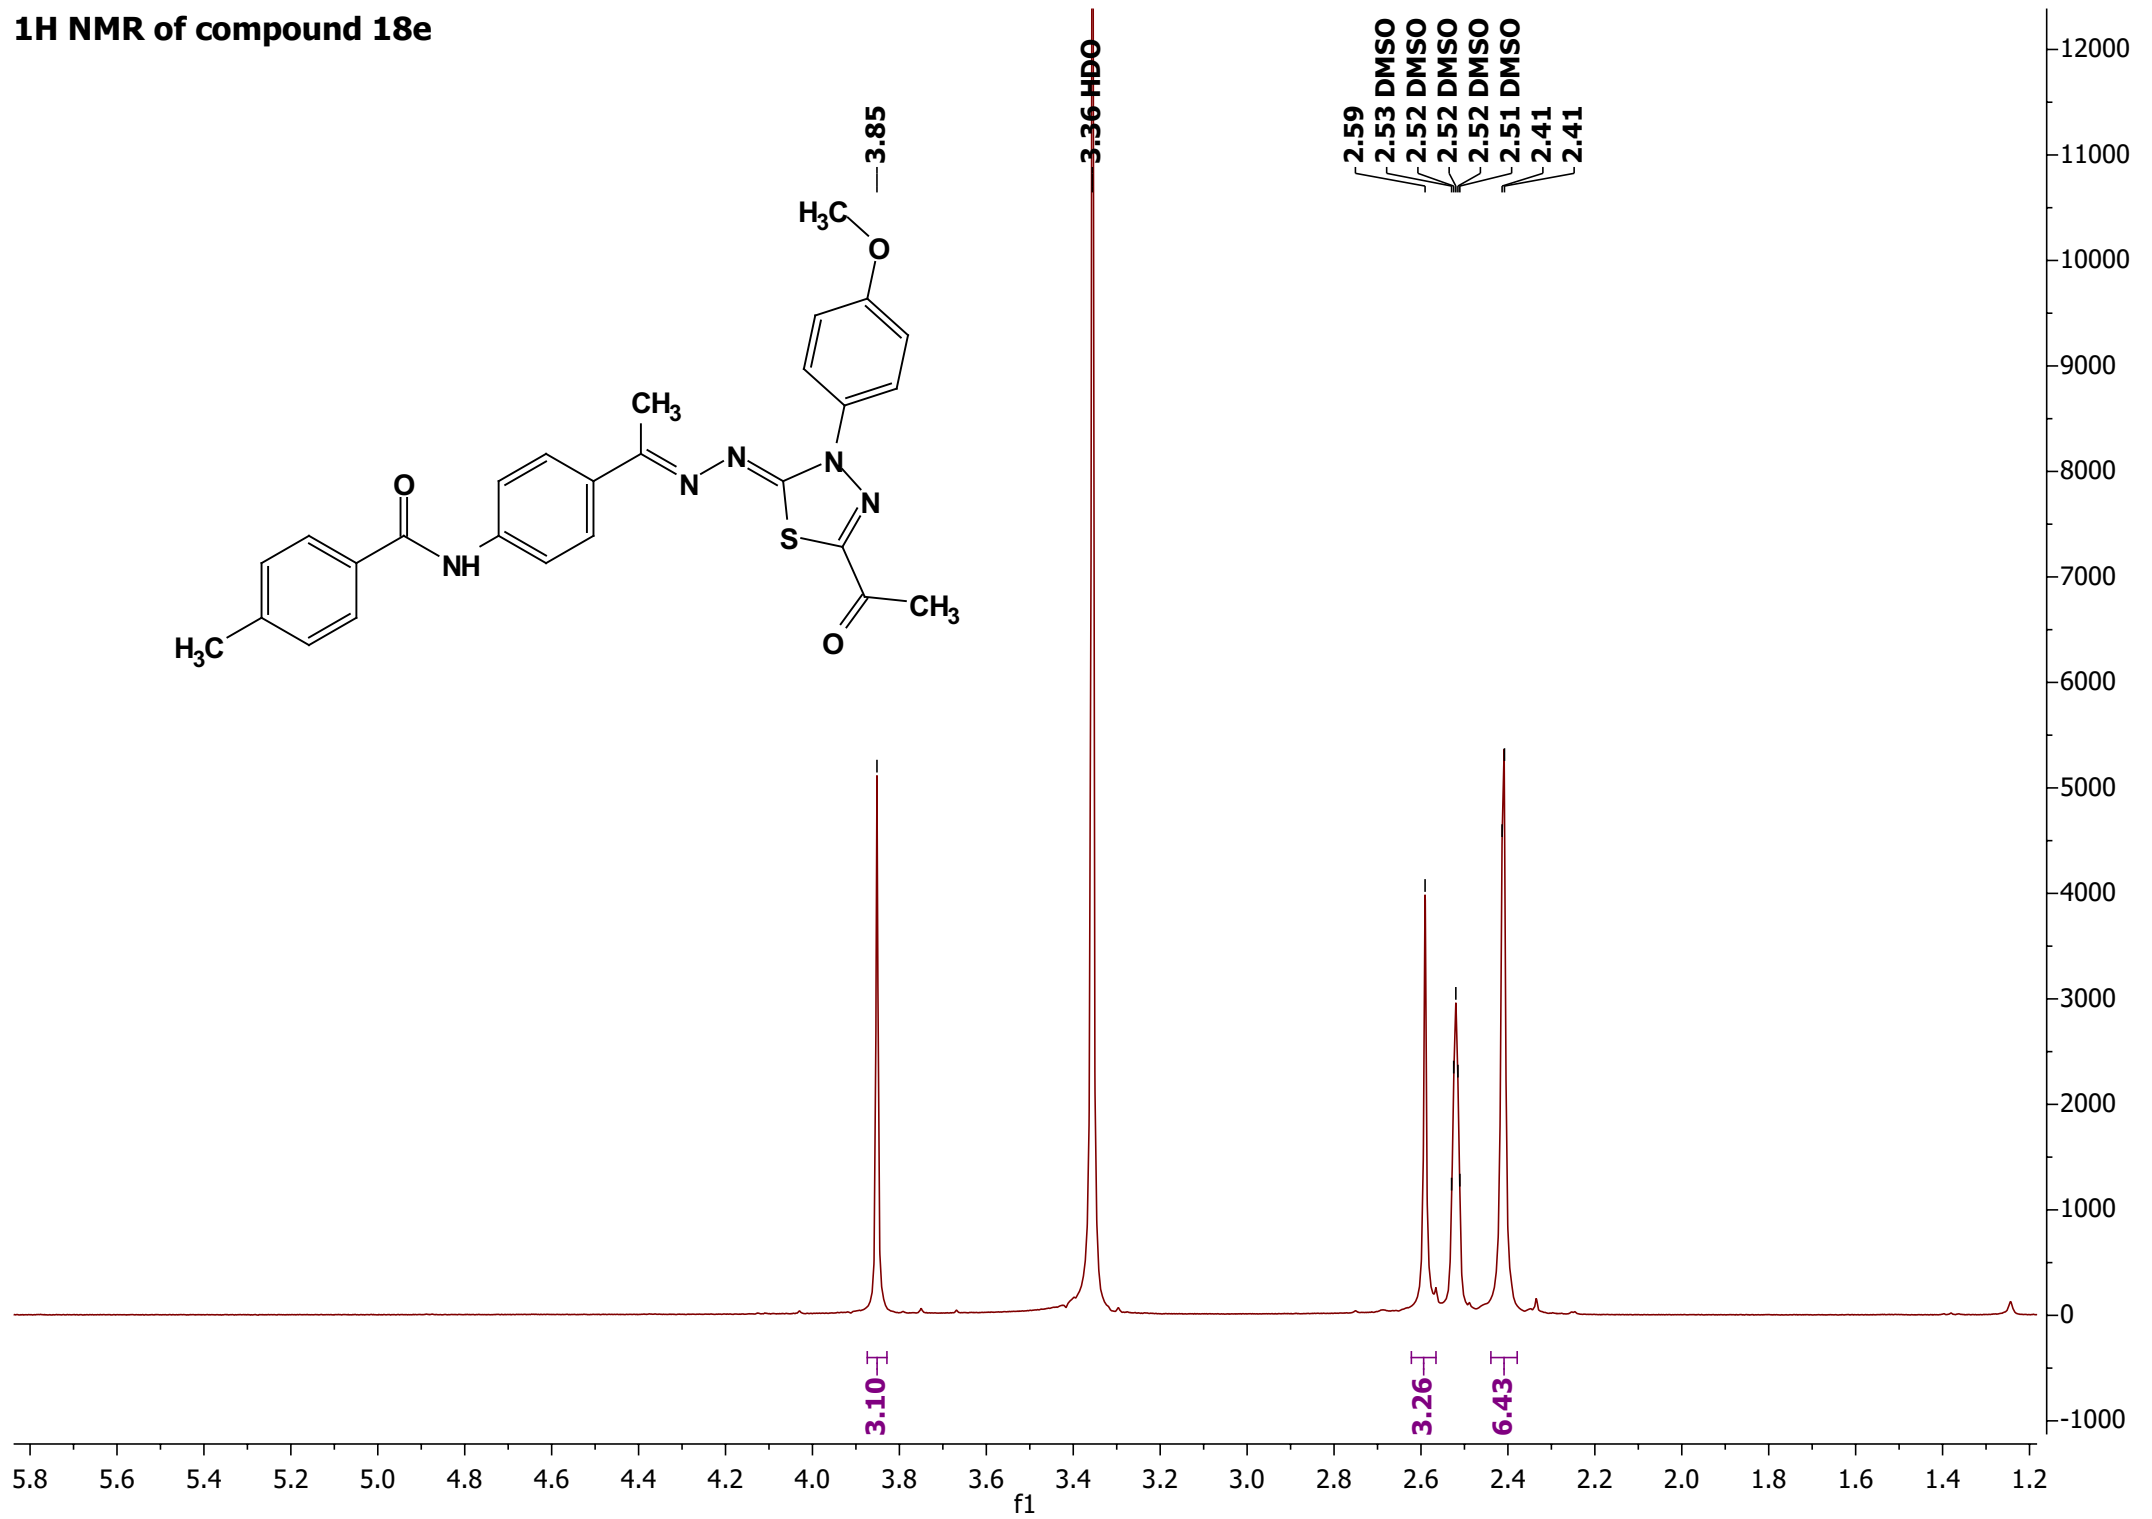

# <sup>1</sup>H NMR of compound 18e

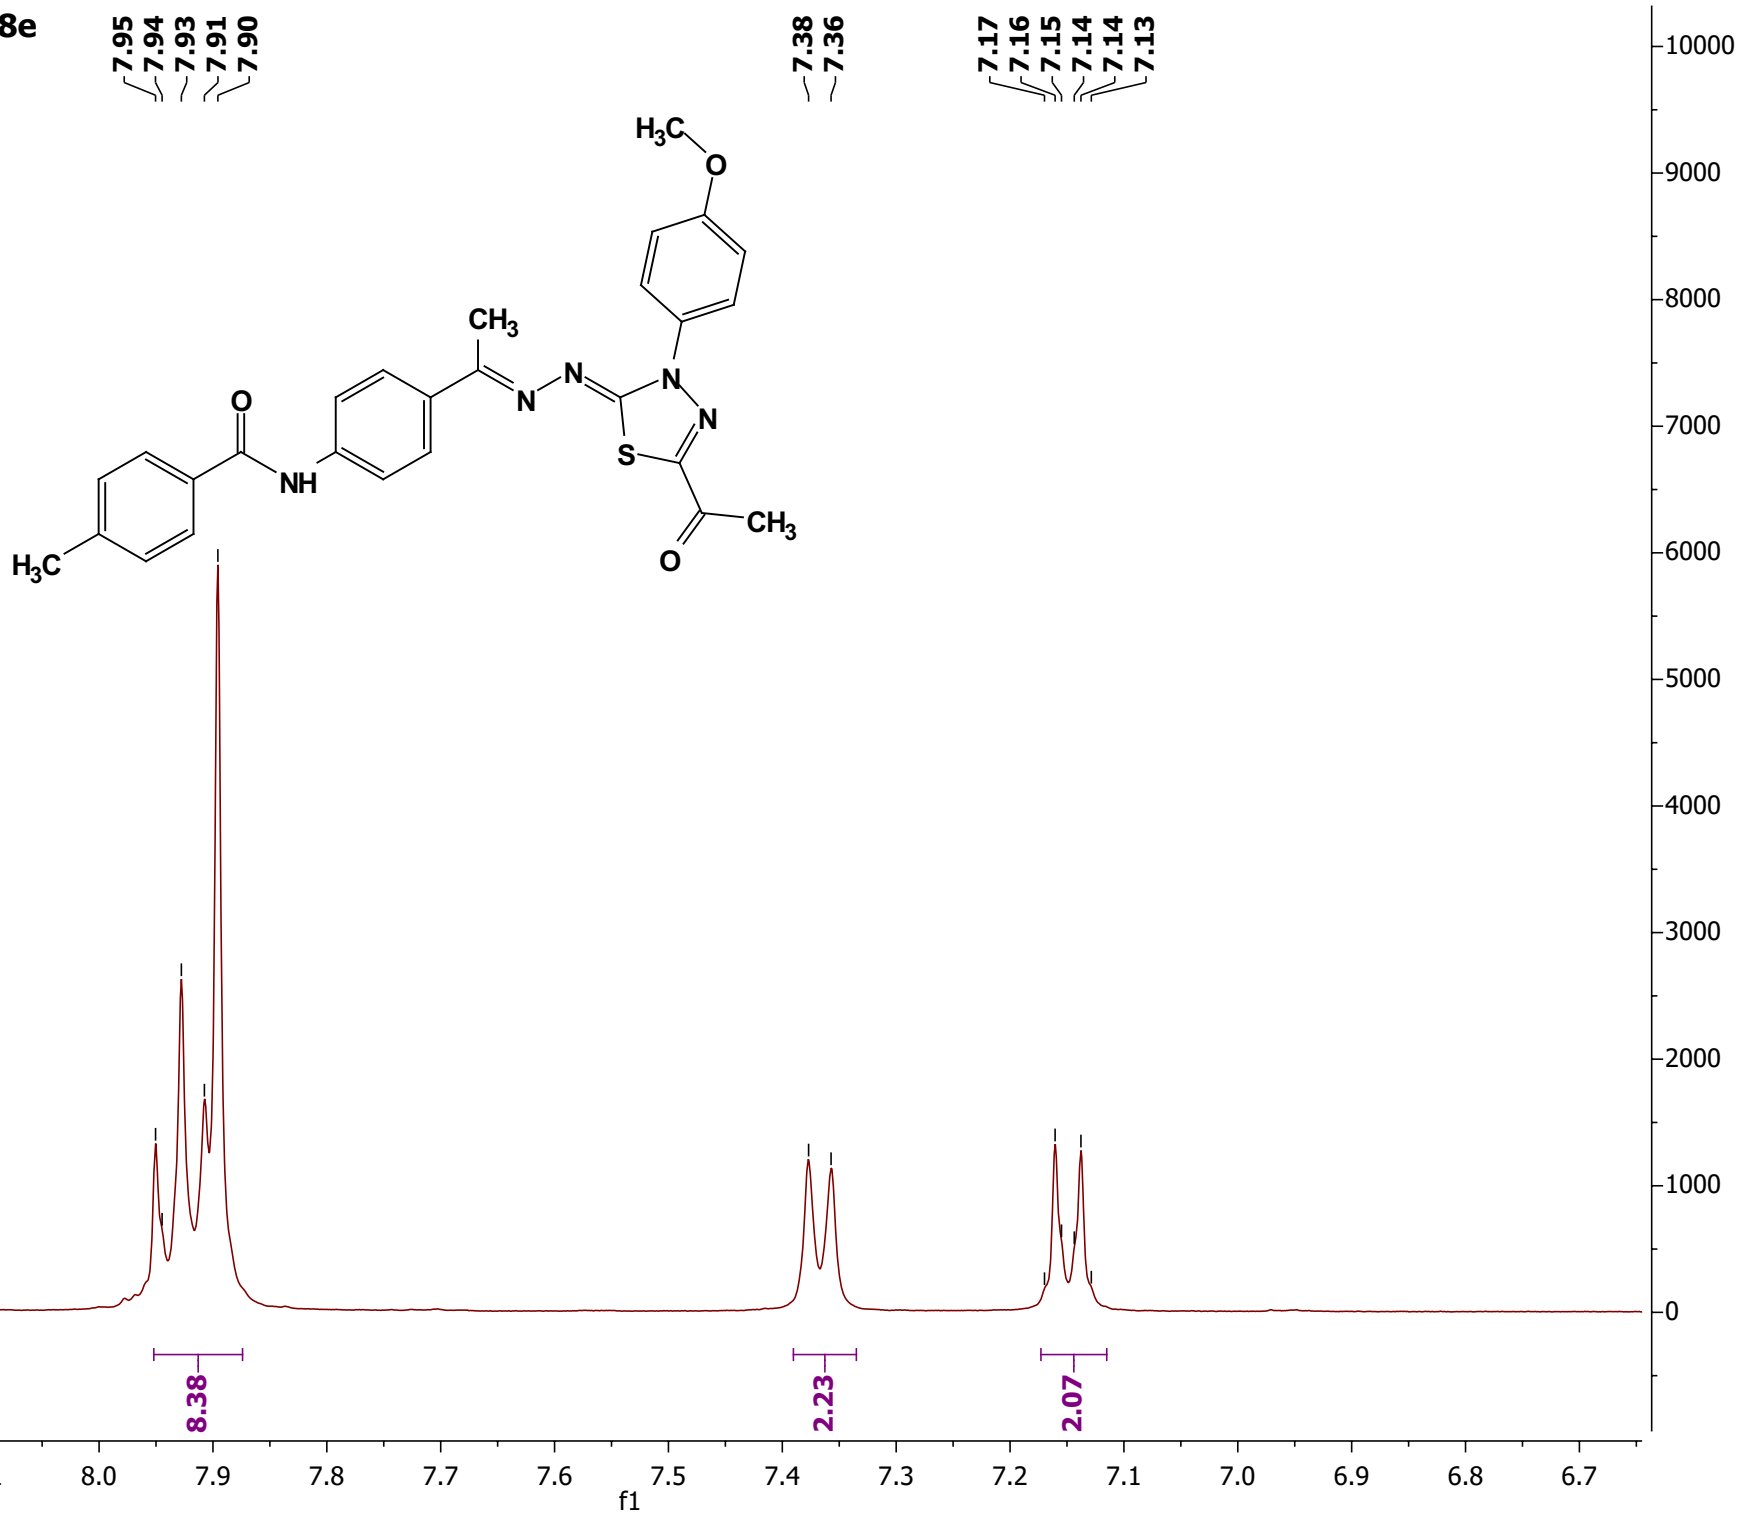

# <sup>13</sup>C NMR of compound 18e

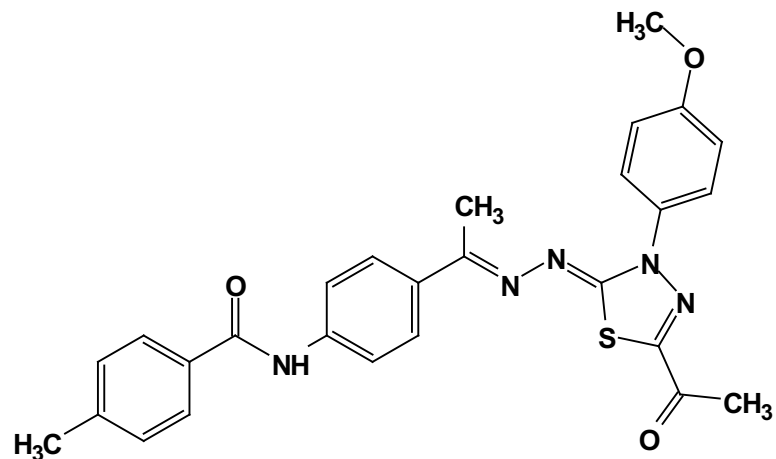

190.14

165.94

164.75

160.07

158.66

150.56

142.25

141.33

132.76

132.35

132.24

129.42

128.26

127.38

124.52

120.30

114.68

55.97

40.63 DMSO

40.42 DMSO

40.21 DMSO

40.00 DMSO

39.79 DMSO

39.58 DMSO

39.37 DMSO

25.48

21.52

15.61

210 200 190 180 170 160 150 140 130 120 110 100 90 80 70 60 50 40 30 20 10 0 -10

f1

6500  
6000  
5500  
5000  
4500  
4000  
3500  
3000  
2500  
2000  
1500  
1000  
500  
0  
-500

# <sup>13</sup>C NMR of compound 18e

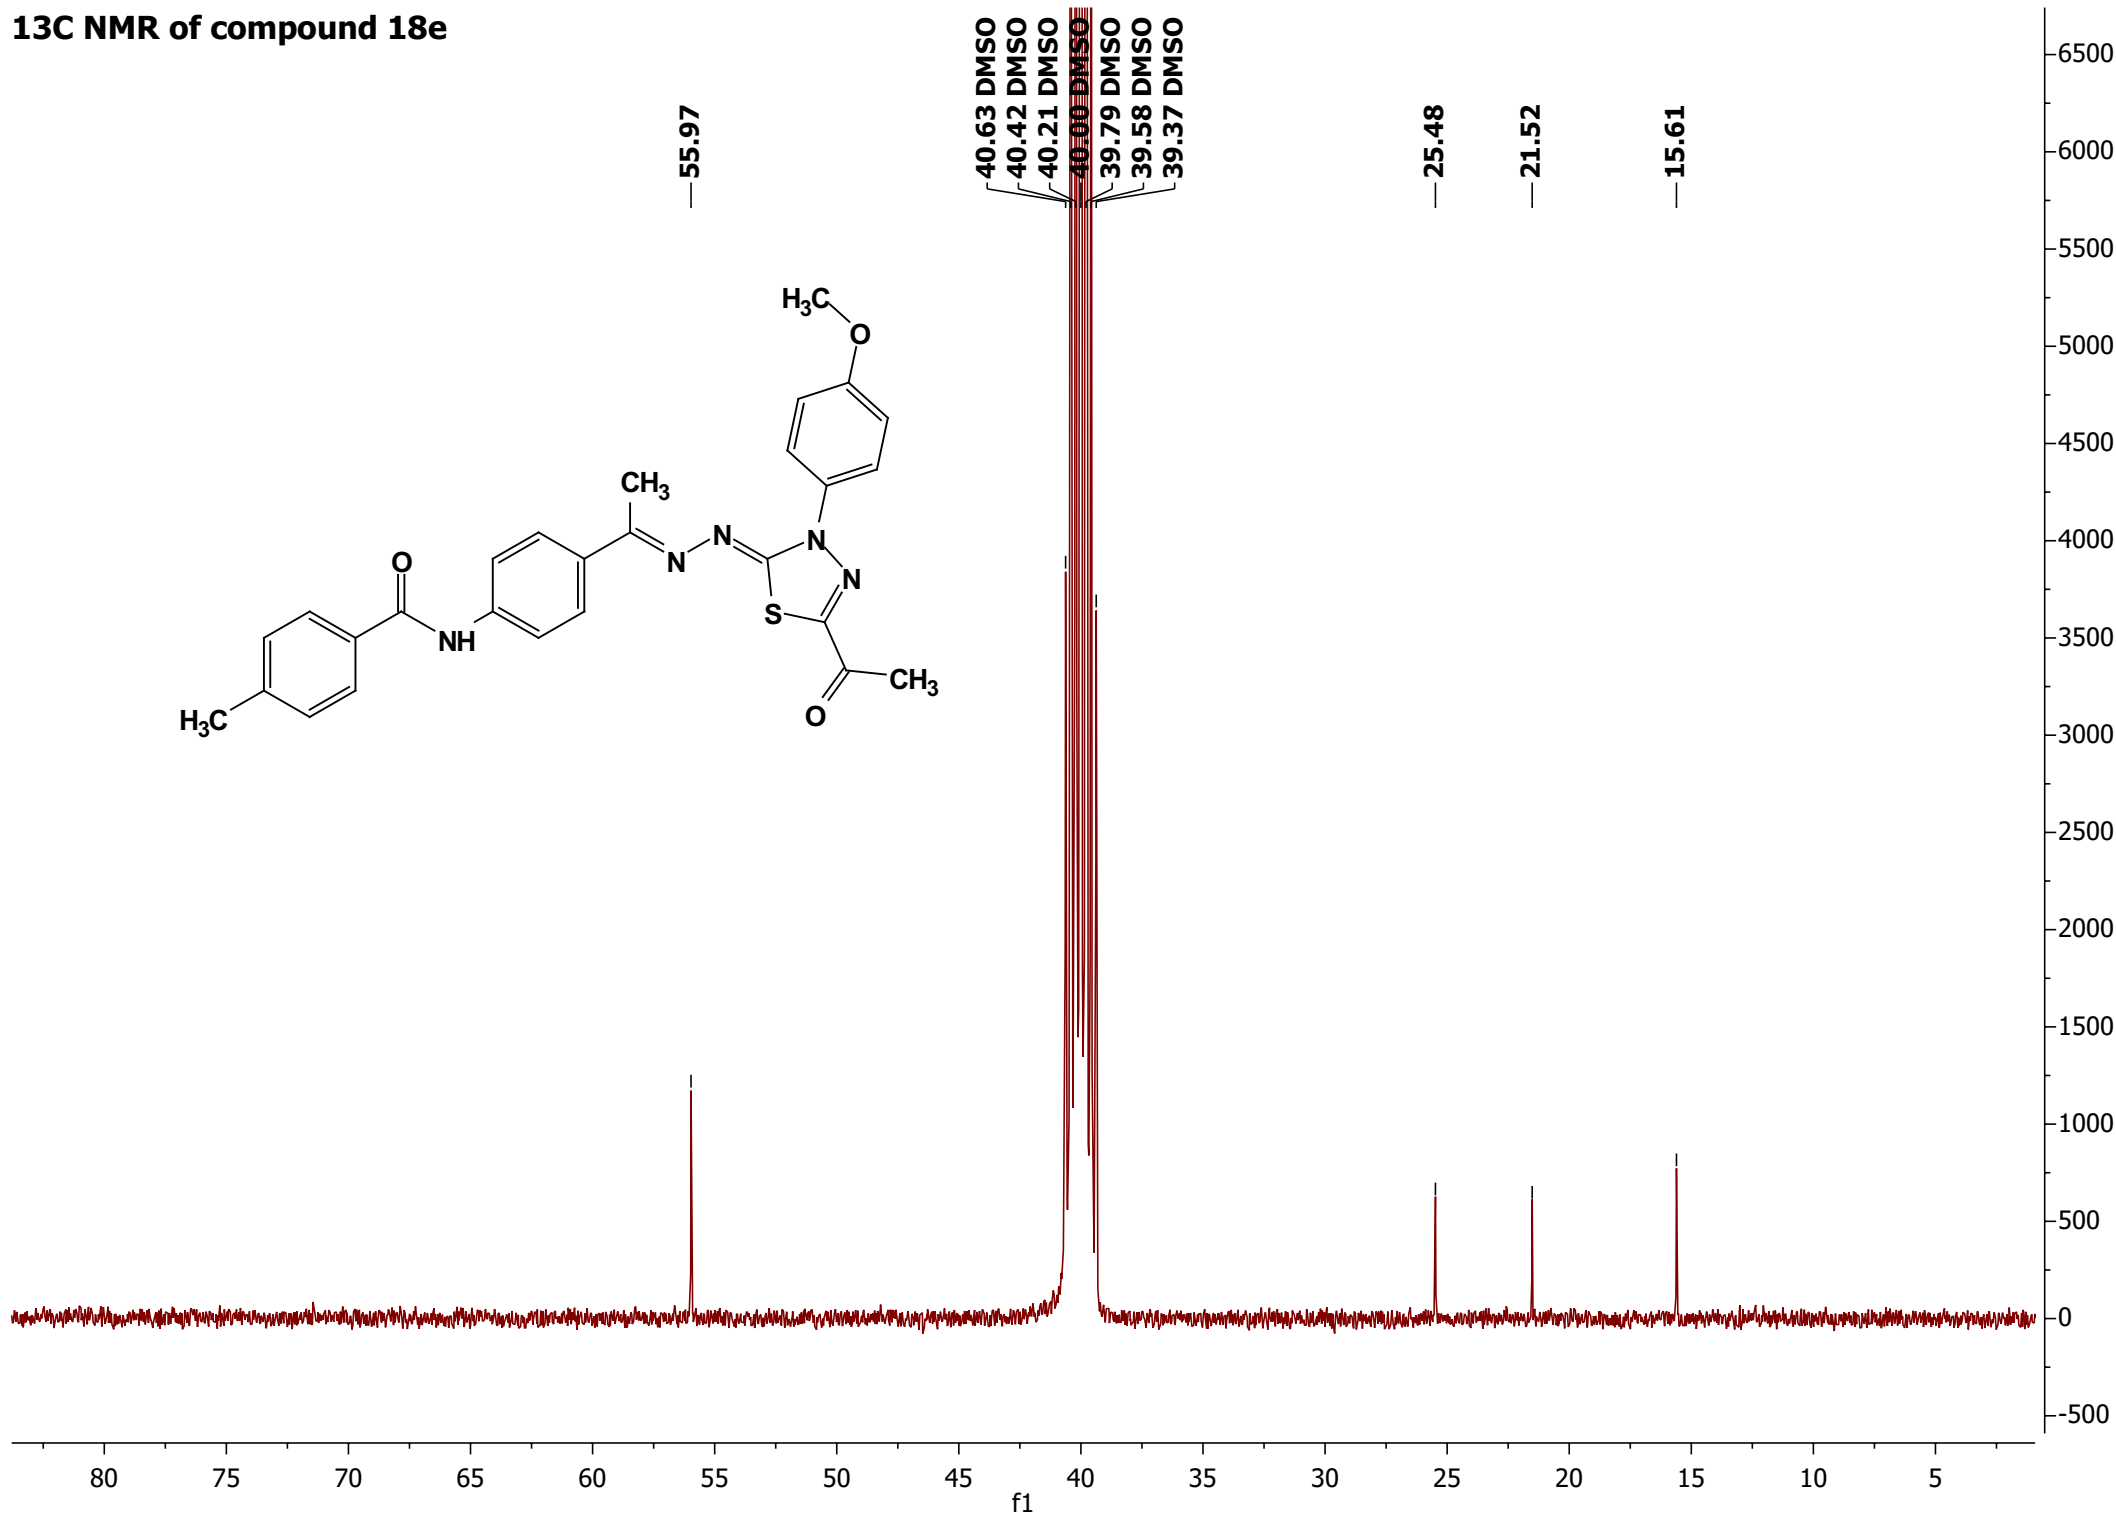

# <sup>13</sup>C NMR of compound 18e

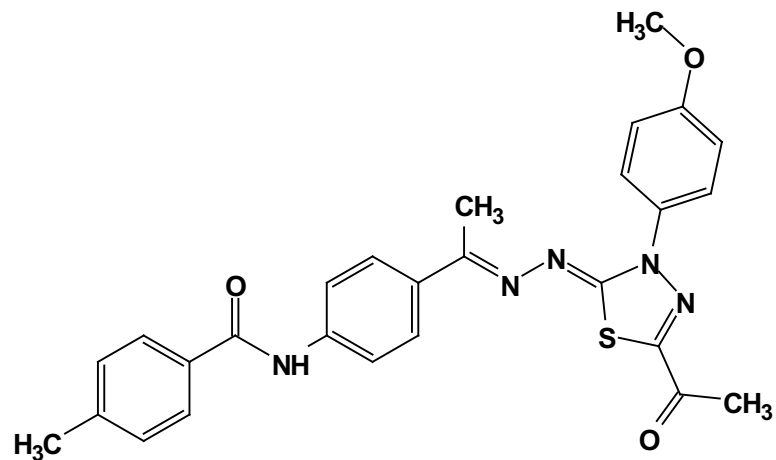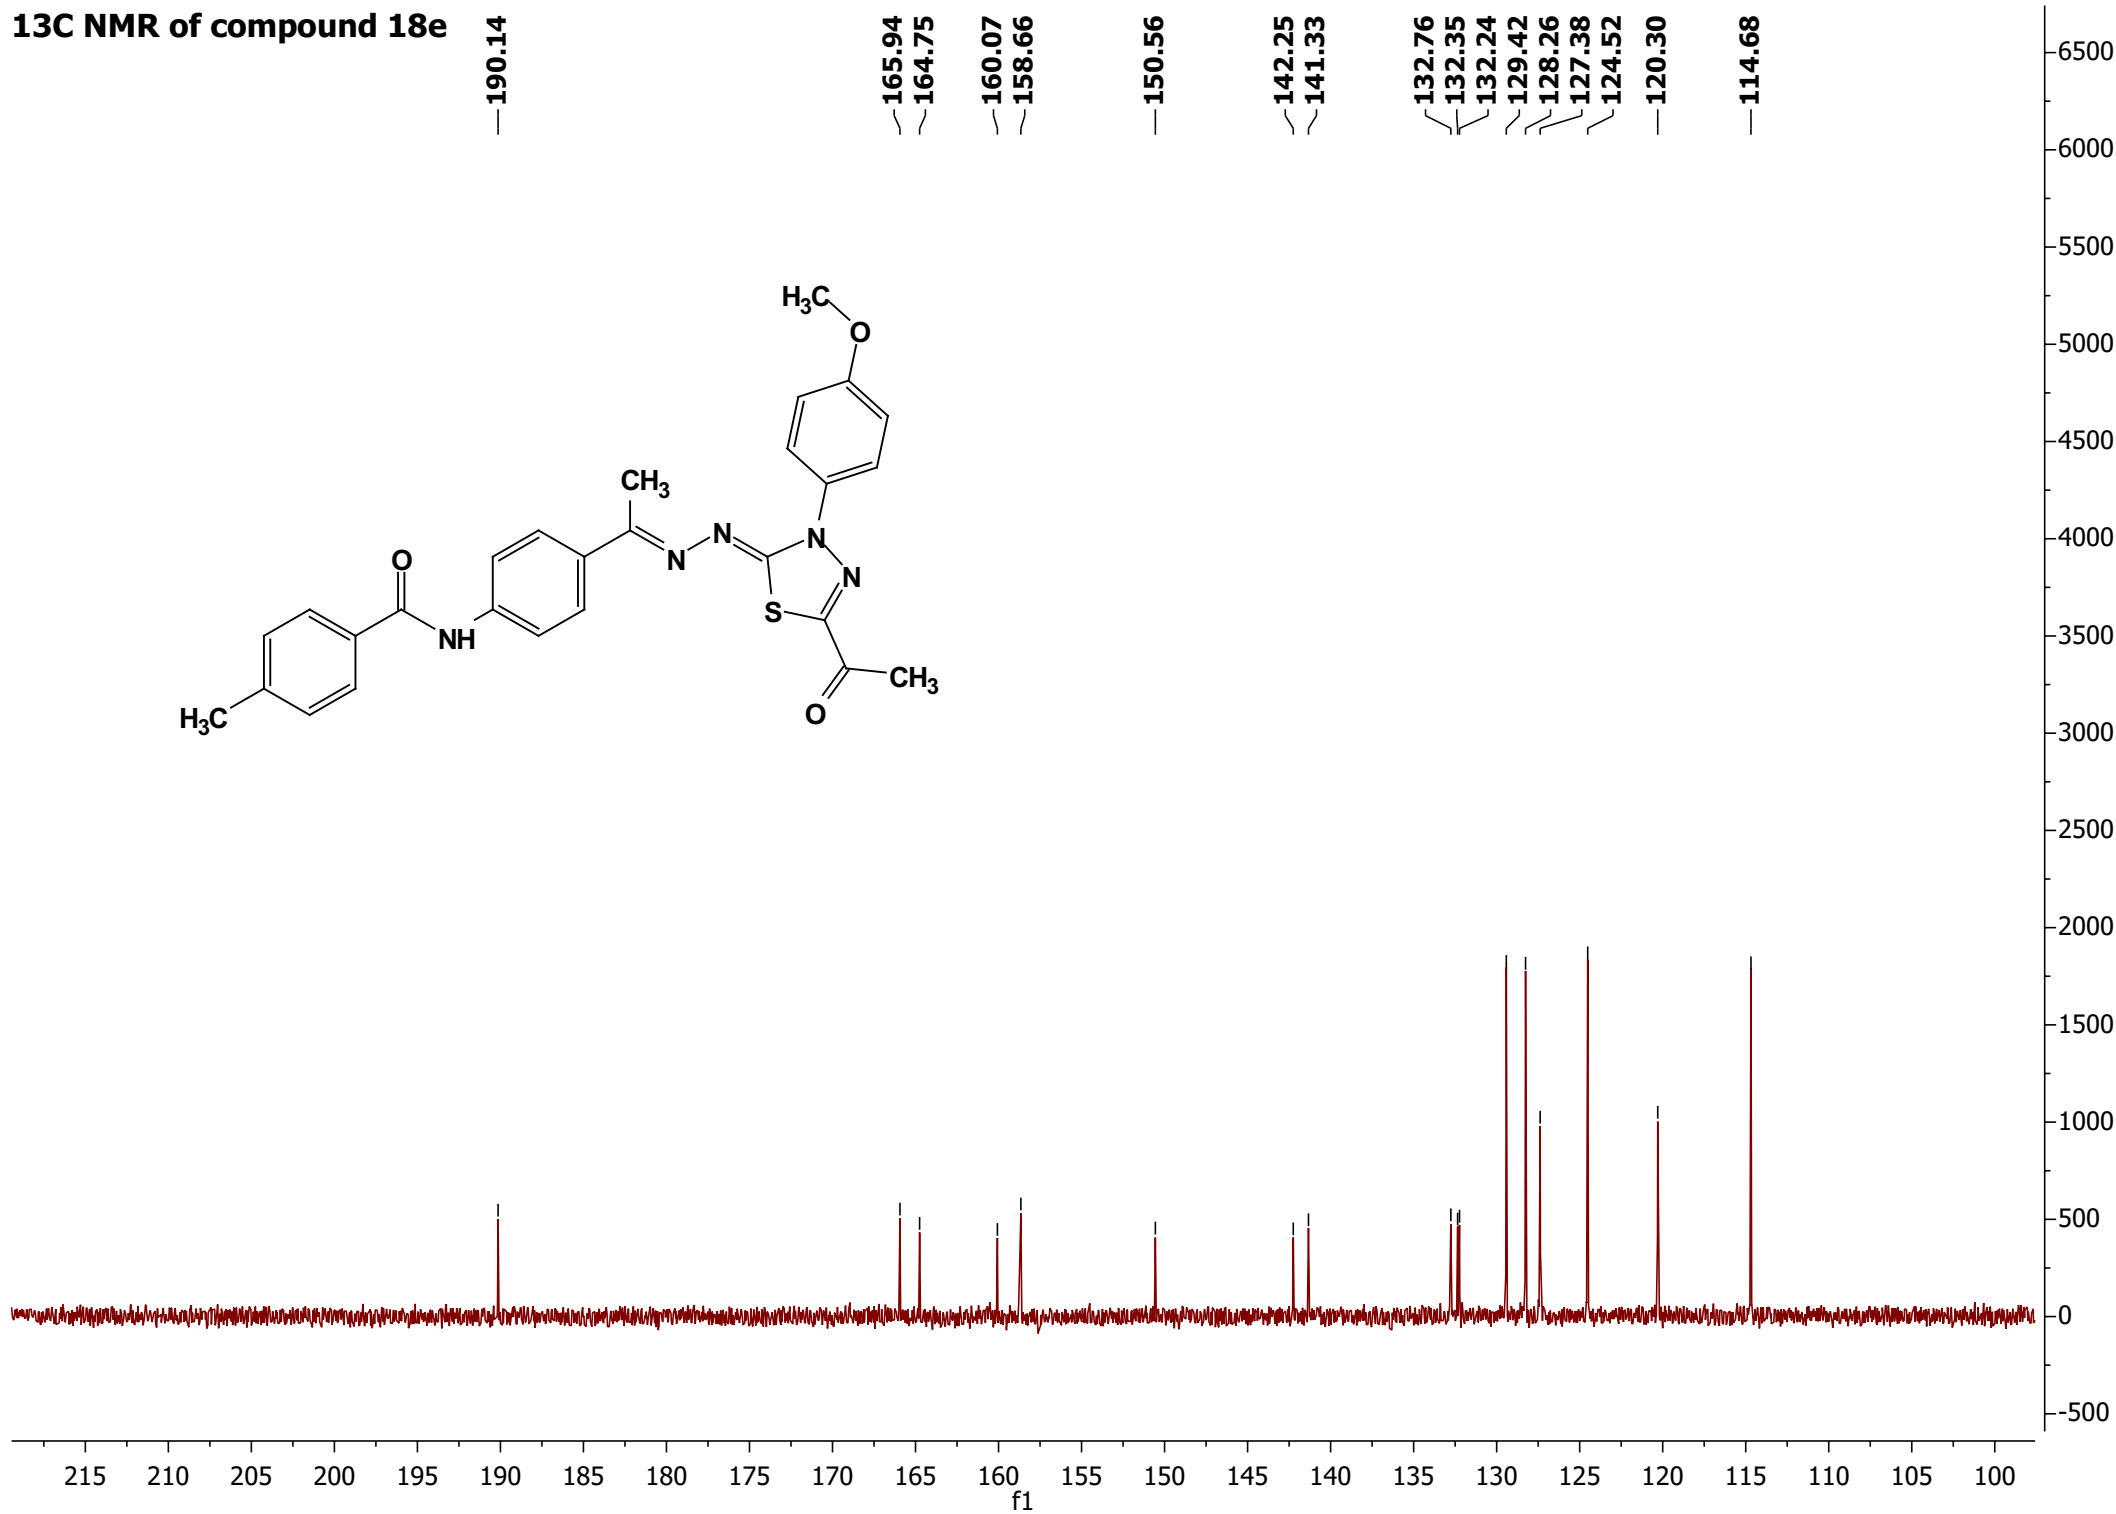

# Mass spec. of compound 18e

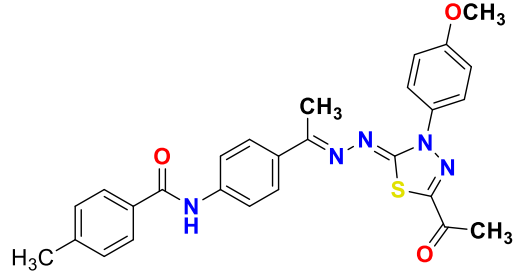

ibrahim-hassan-wm1 #28-29 RT: 0.49-0.50 AV: 2 SB: 26 1.21-1.34 , 0.87-1.14 NL: 2.91E2  
T: {0,0} + c EI Full ms [40.00-1000.00]

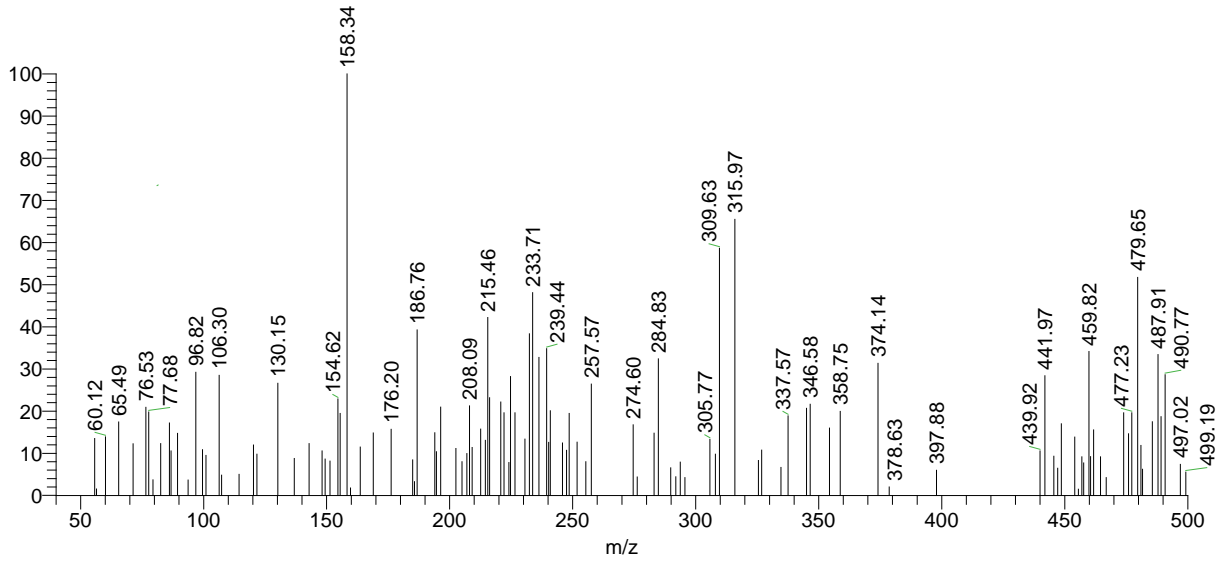

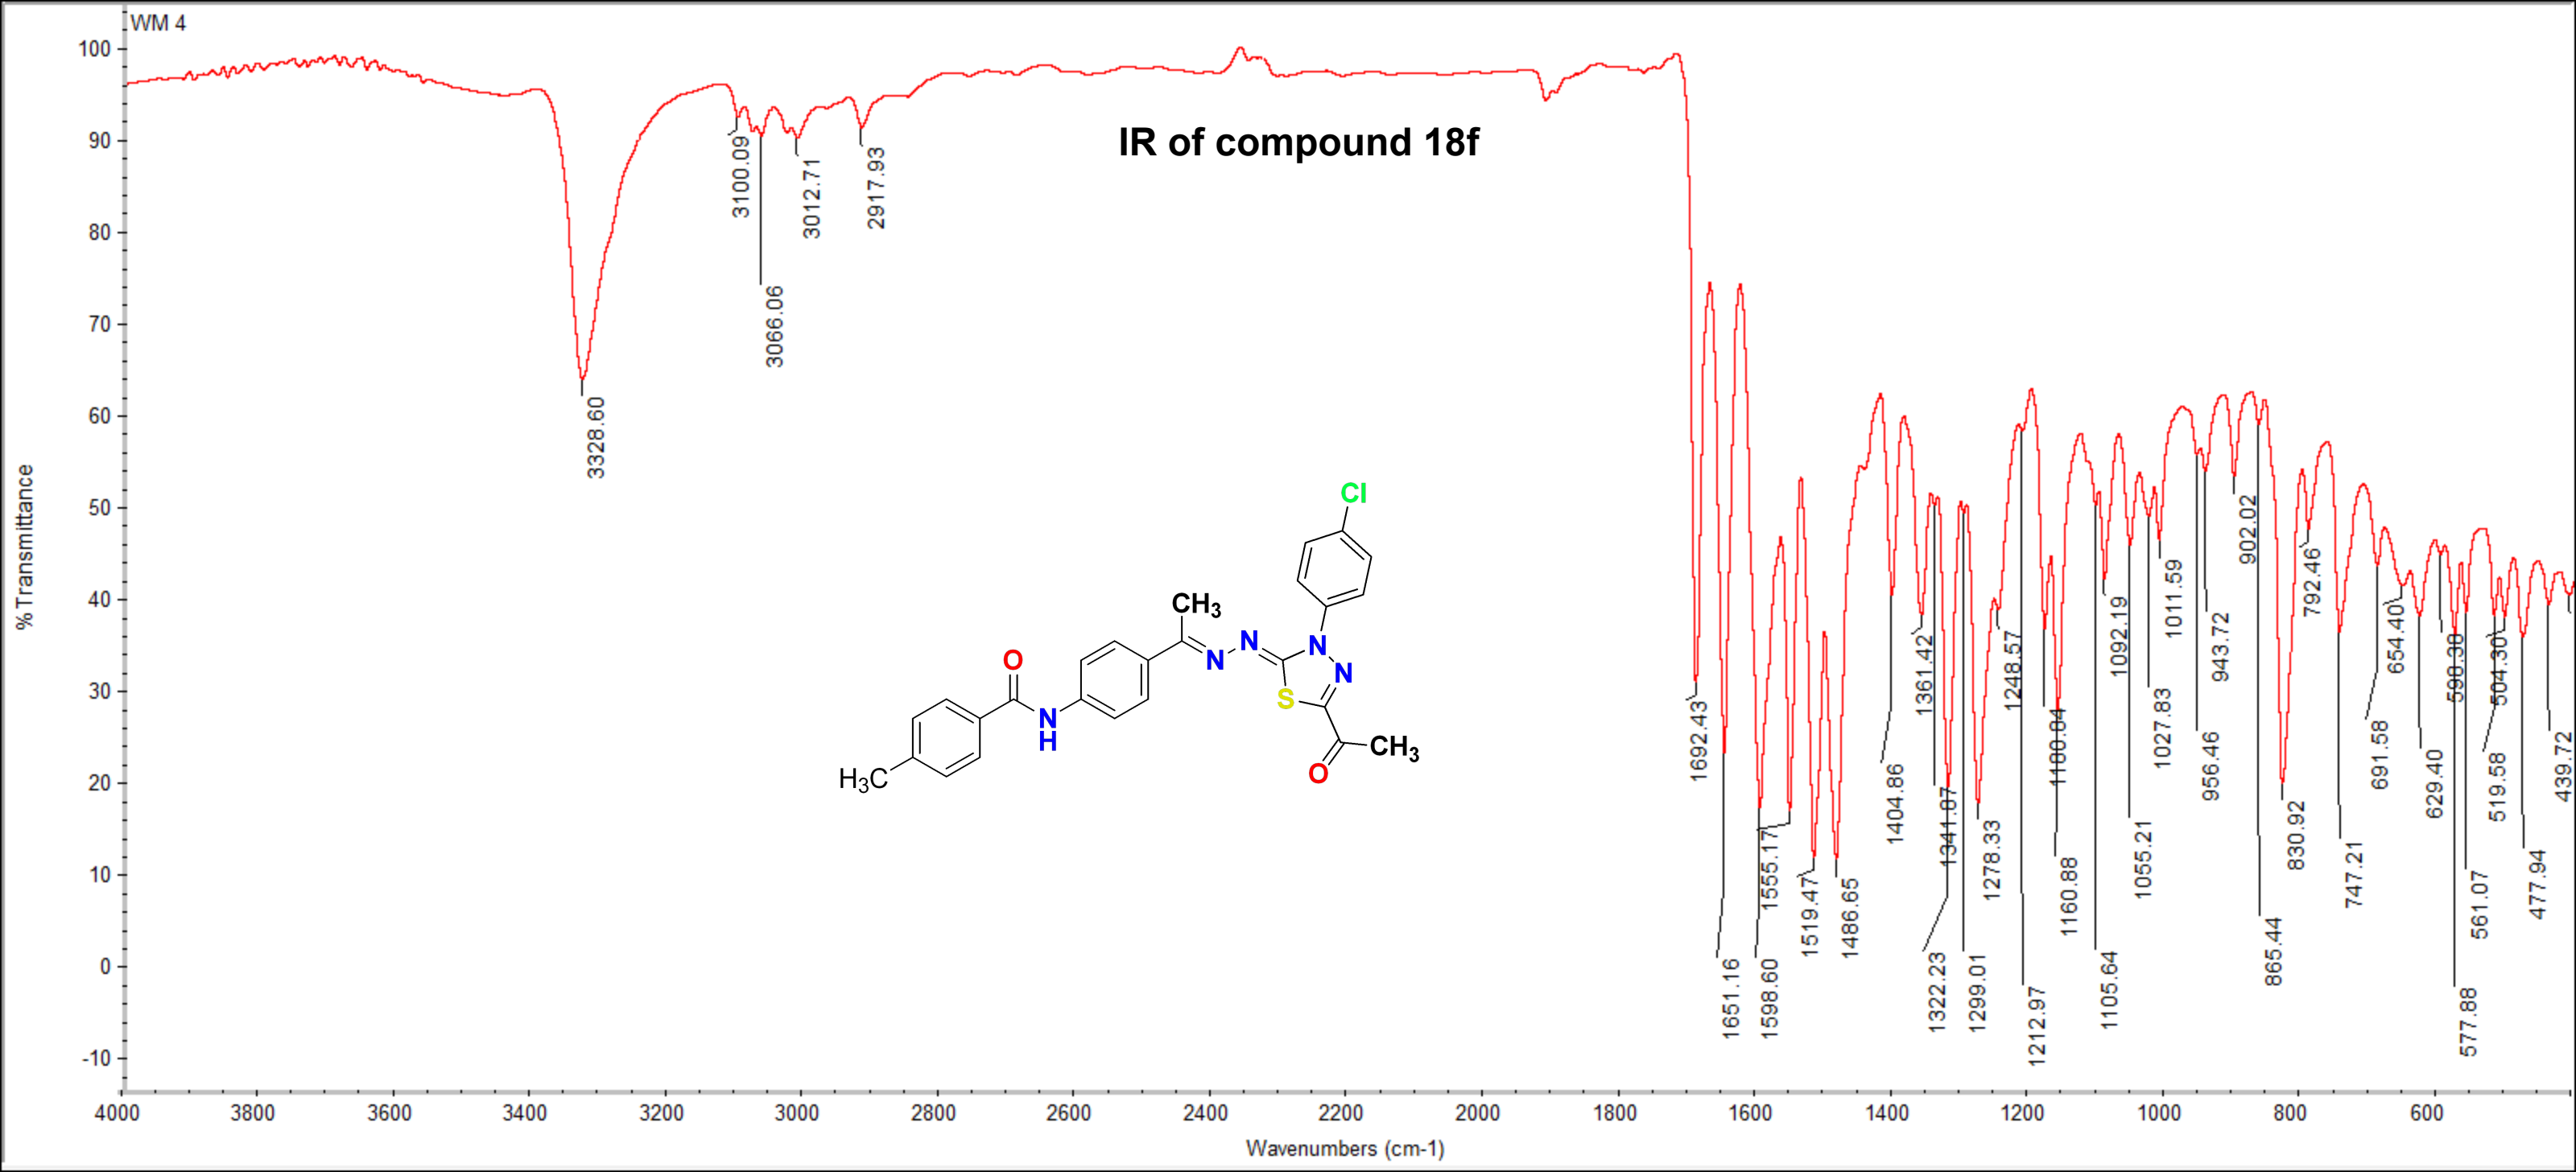



# <sup>1</sup>H NMR of compound 18f

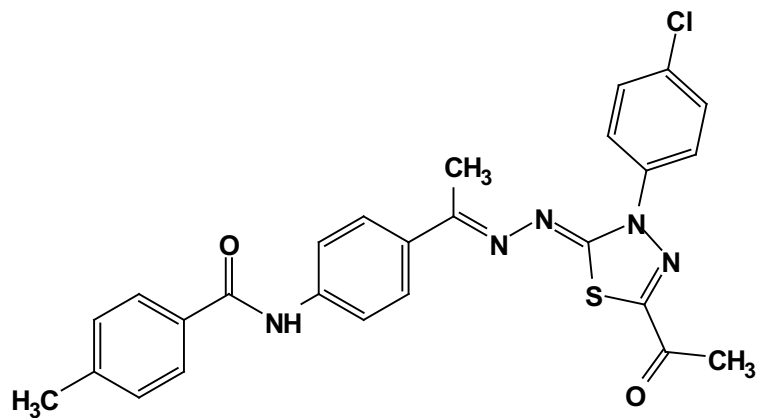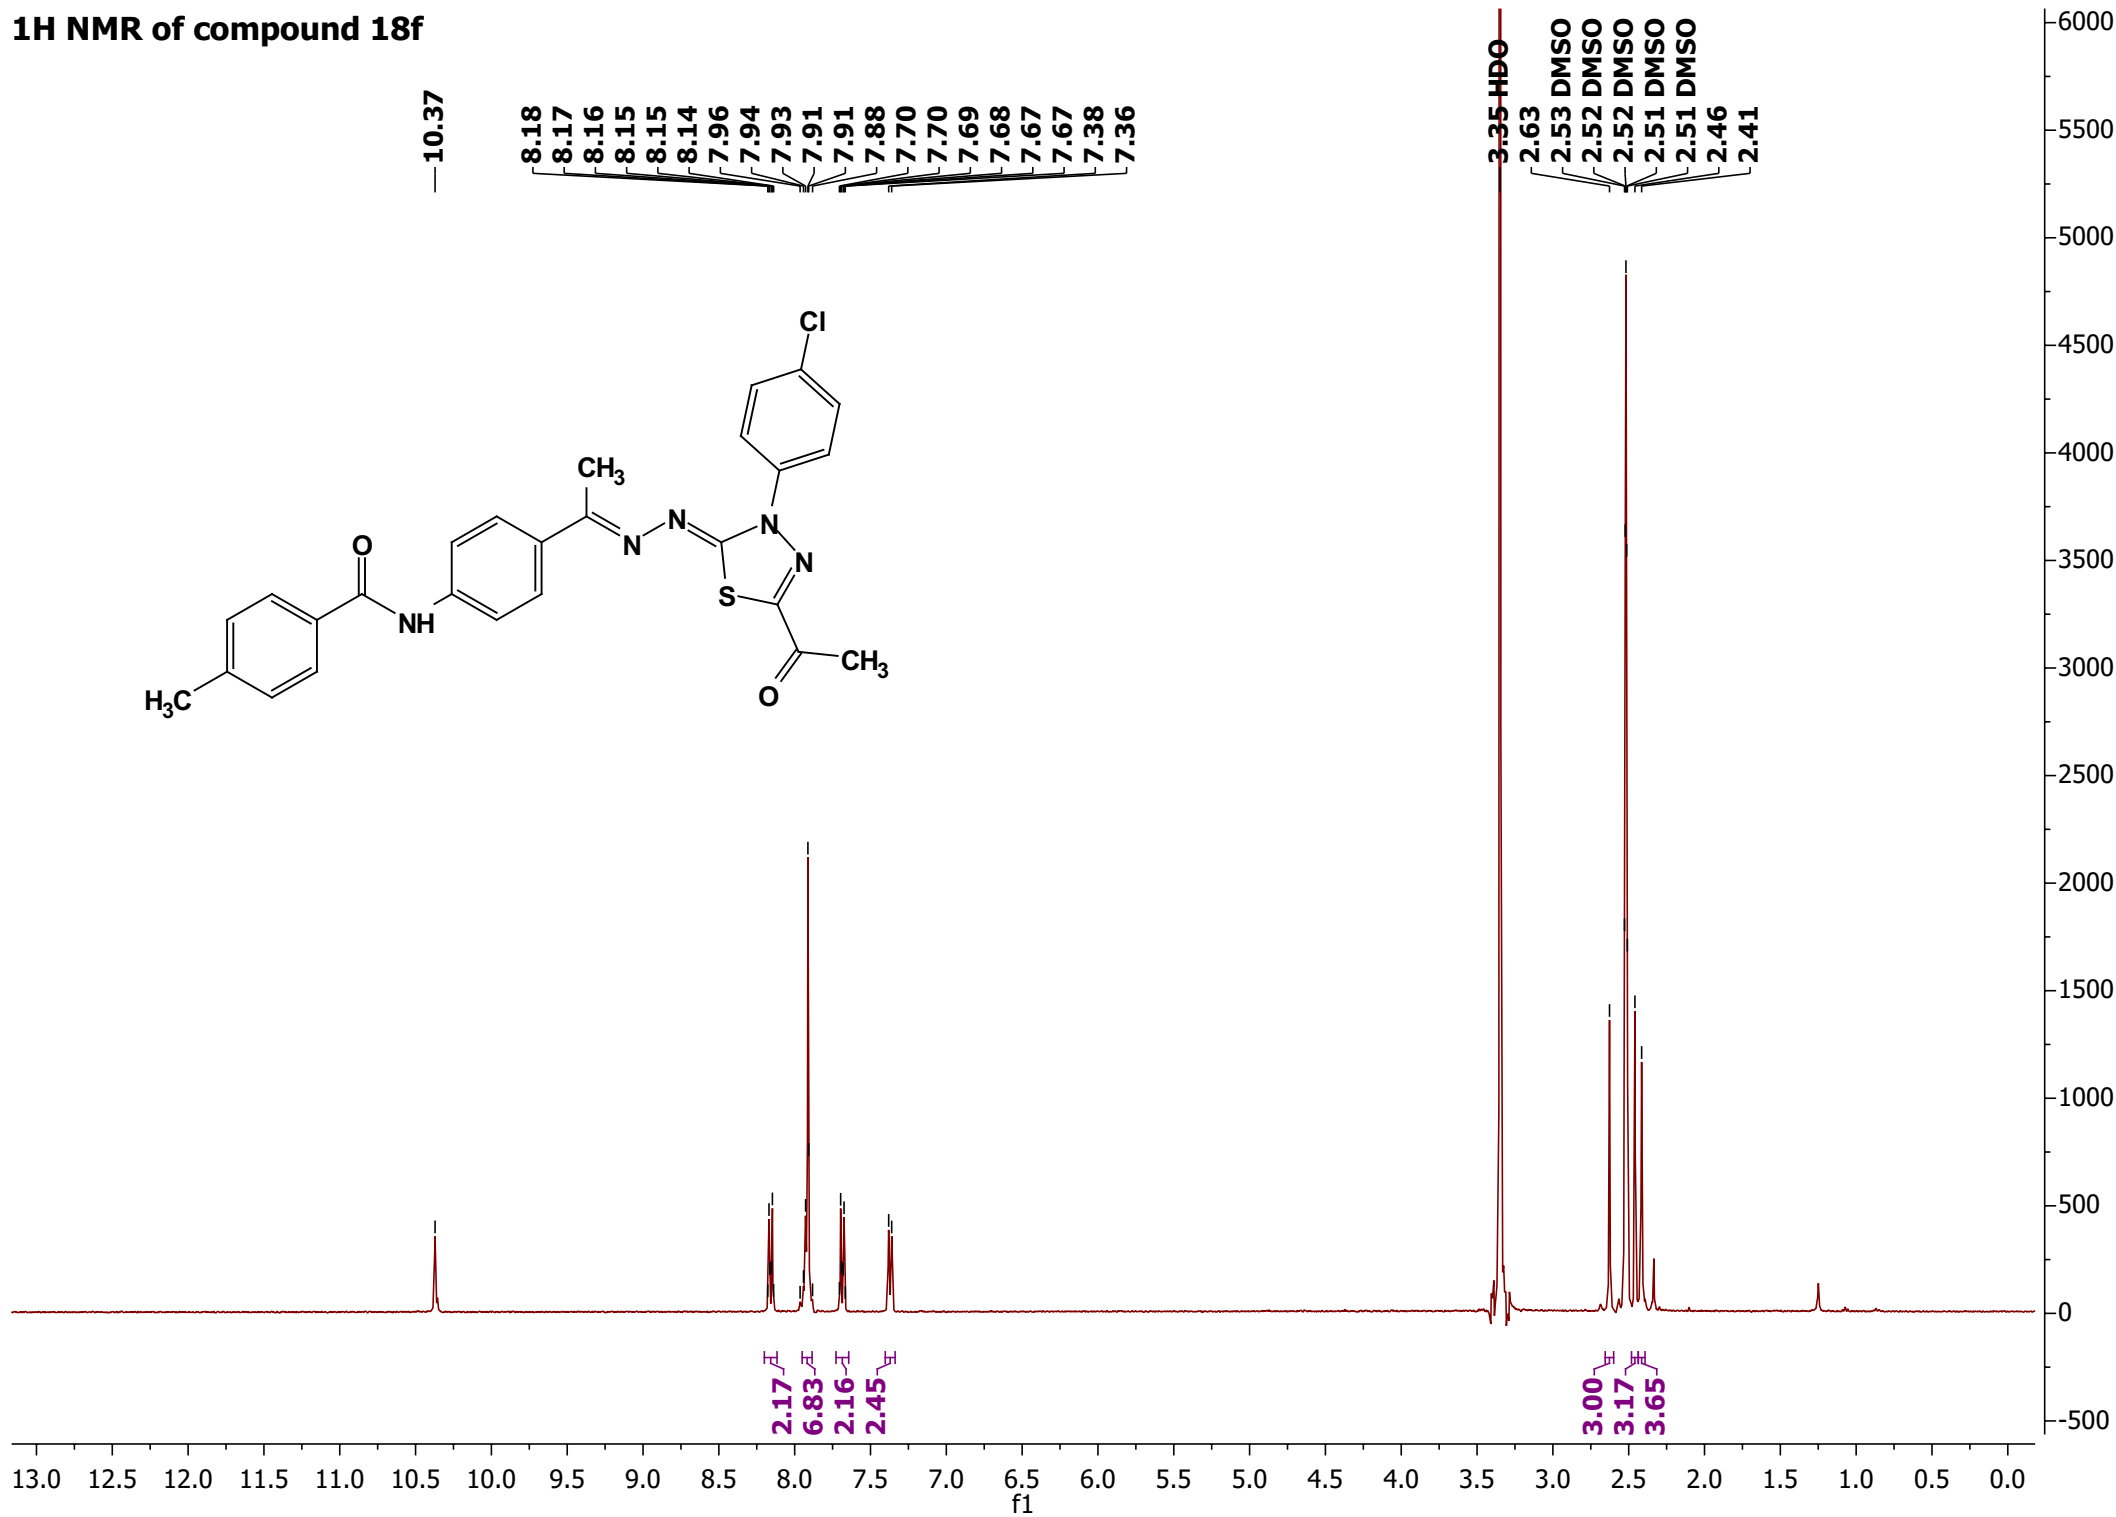

# **<sup>1</sup>H NMR of compound 18f**

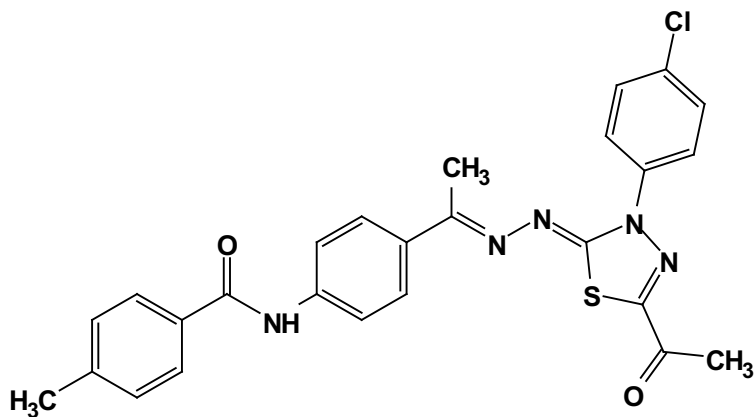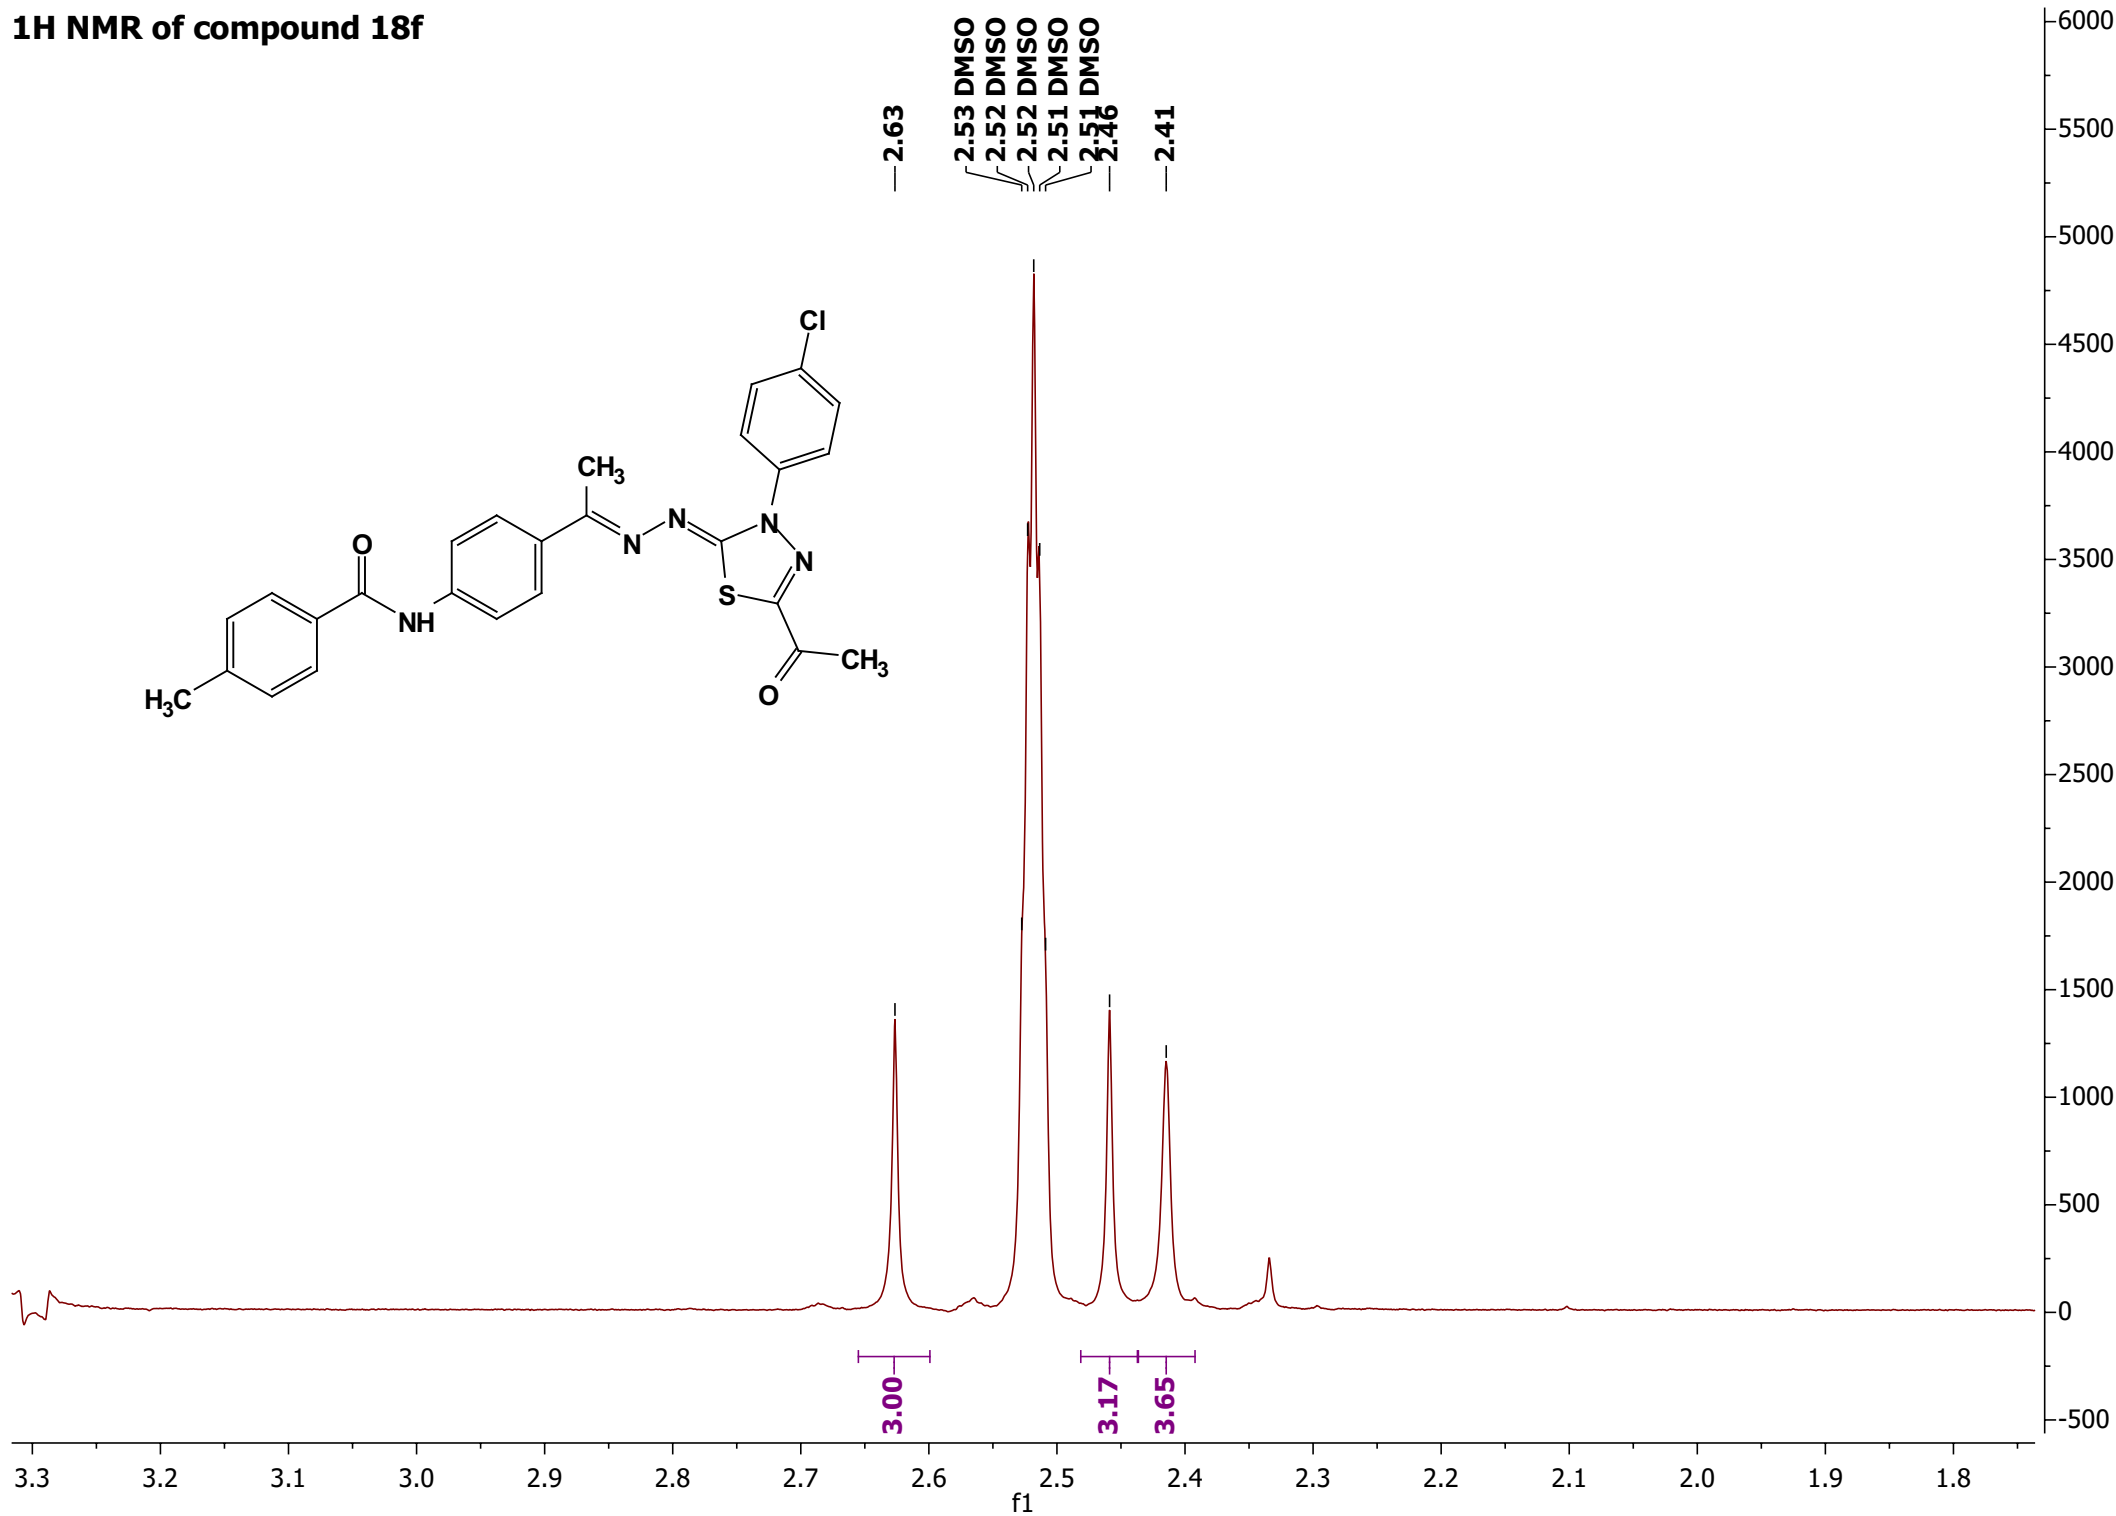

# **<sup>1</sup>H NMR of compound 18f**



8.18  
8.17  
8.16  
8.15  
8.15  
8.14

7.96  
7.94  
7.93  
7.91  
7.91  
7.88

7.70  
7.70  
7.69  
7.68  
7.67  
7.67

7.38  
7.36

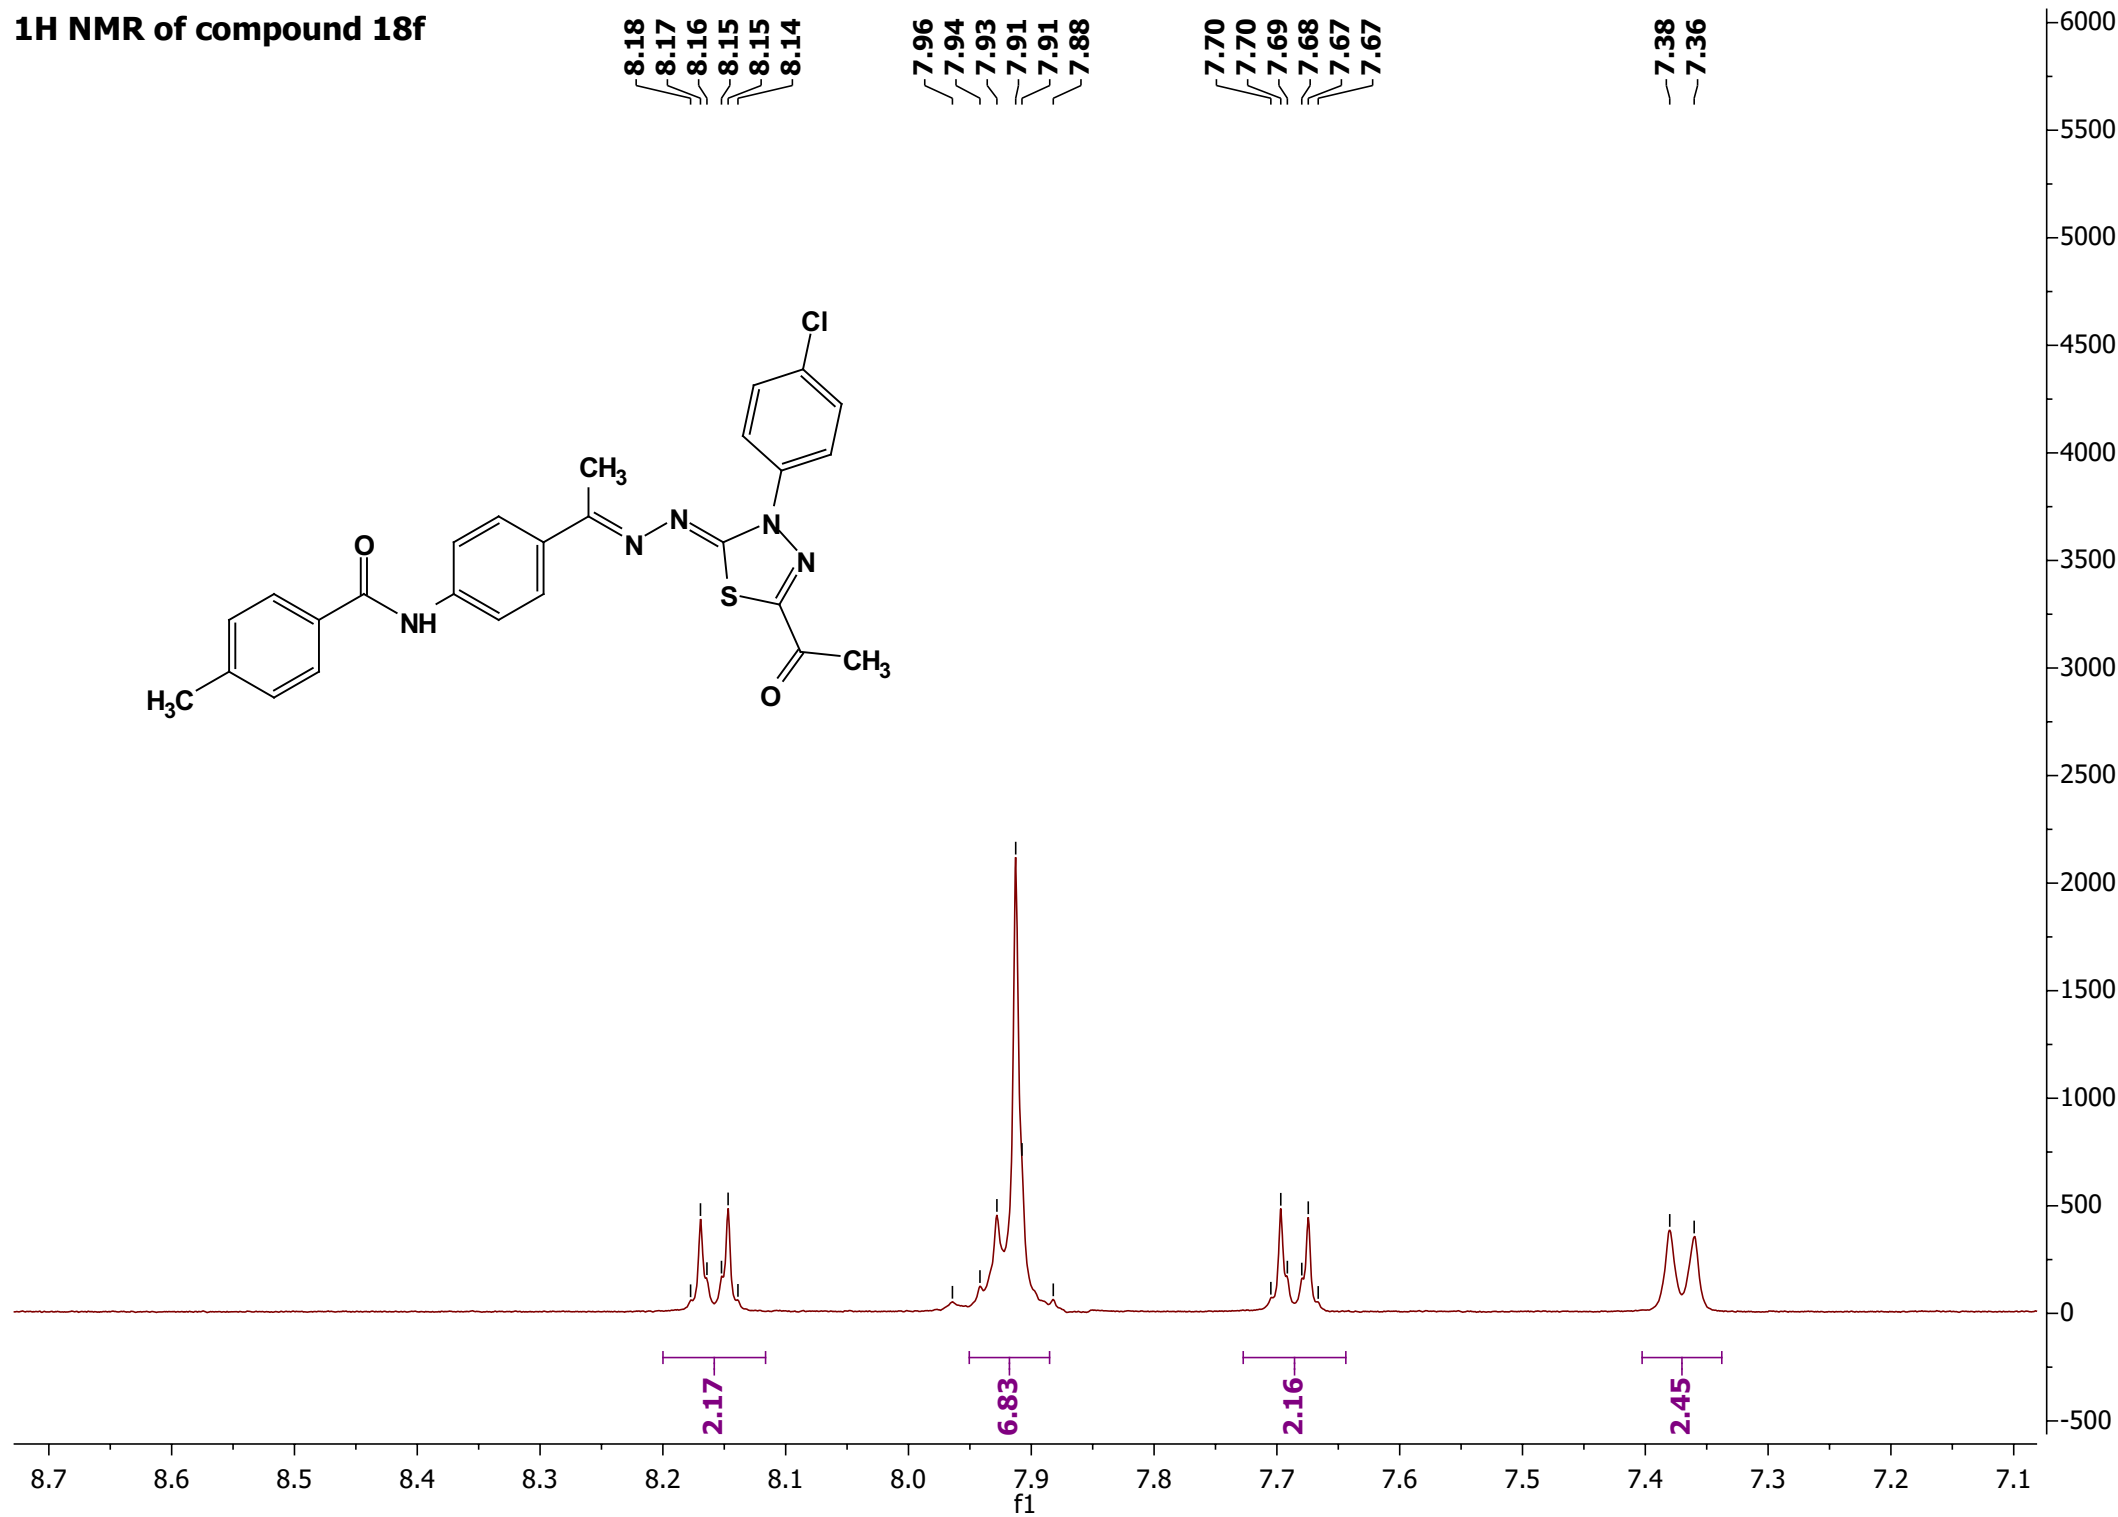

# <sup>13</sup>C NMR of compound 18f

166.03  
164.16  
161.00

151.49  
142.23  
141.53  
138.27  
132.83  
132.51  
131.64  
129.59  
129.41  
128.26  
127.51  
123.99  
120.47

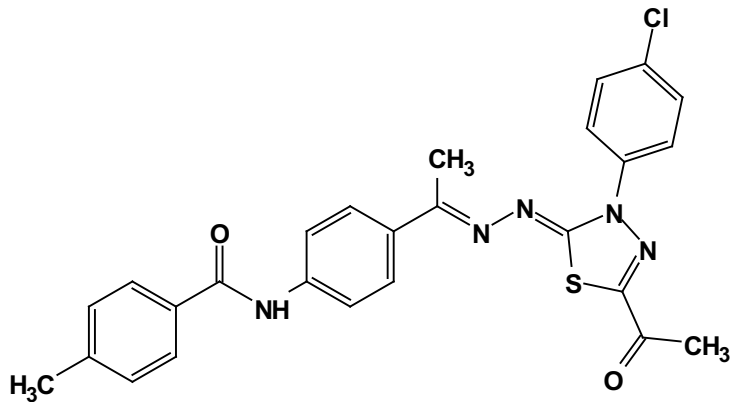

40.75 DMSO-D6  
40.59 DMSO-D6  
40.42 DMSO-D6  
40.25 DMSO-D6  
40.09 DMSO-D6  
39.92 DMSO-D6  
39.75 DMSO-D6

25.50  
21.49  
15.82

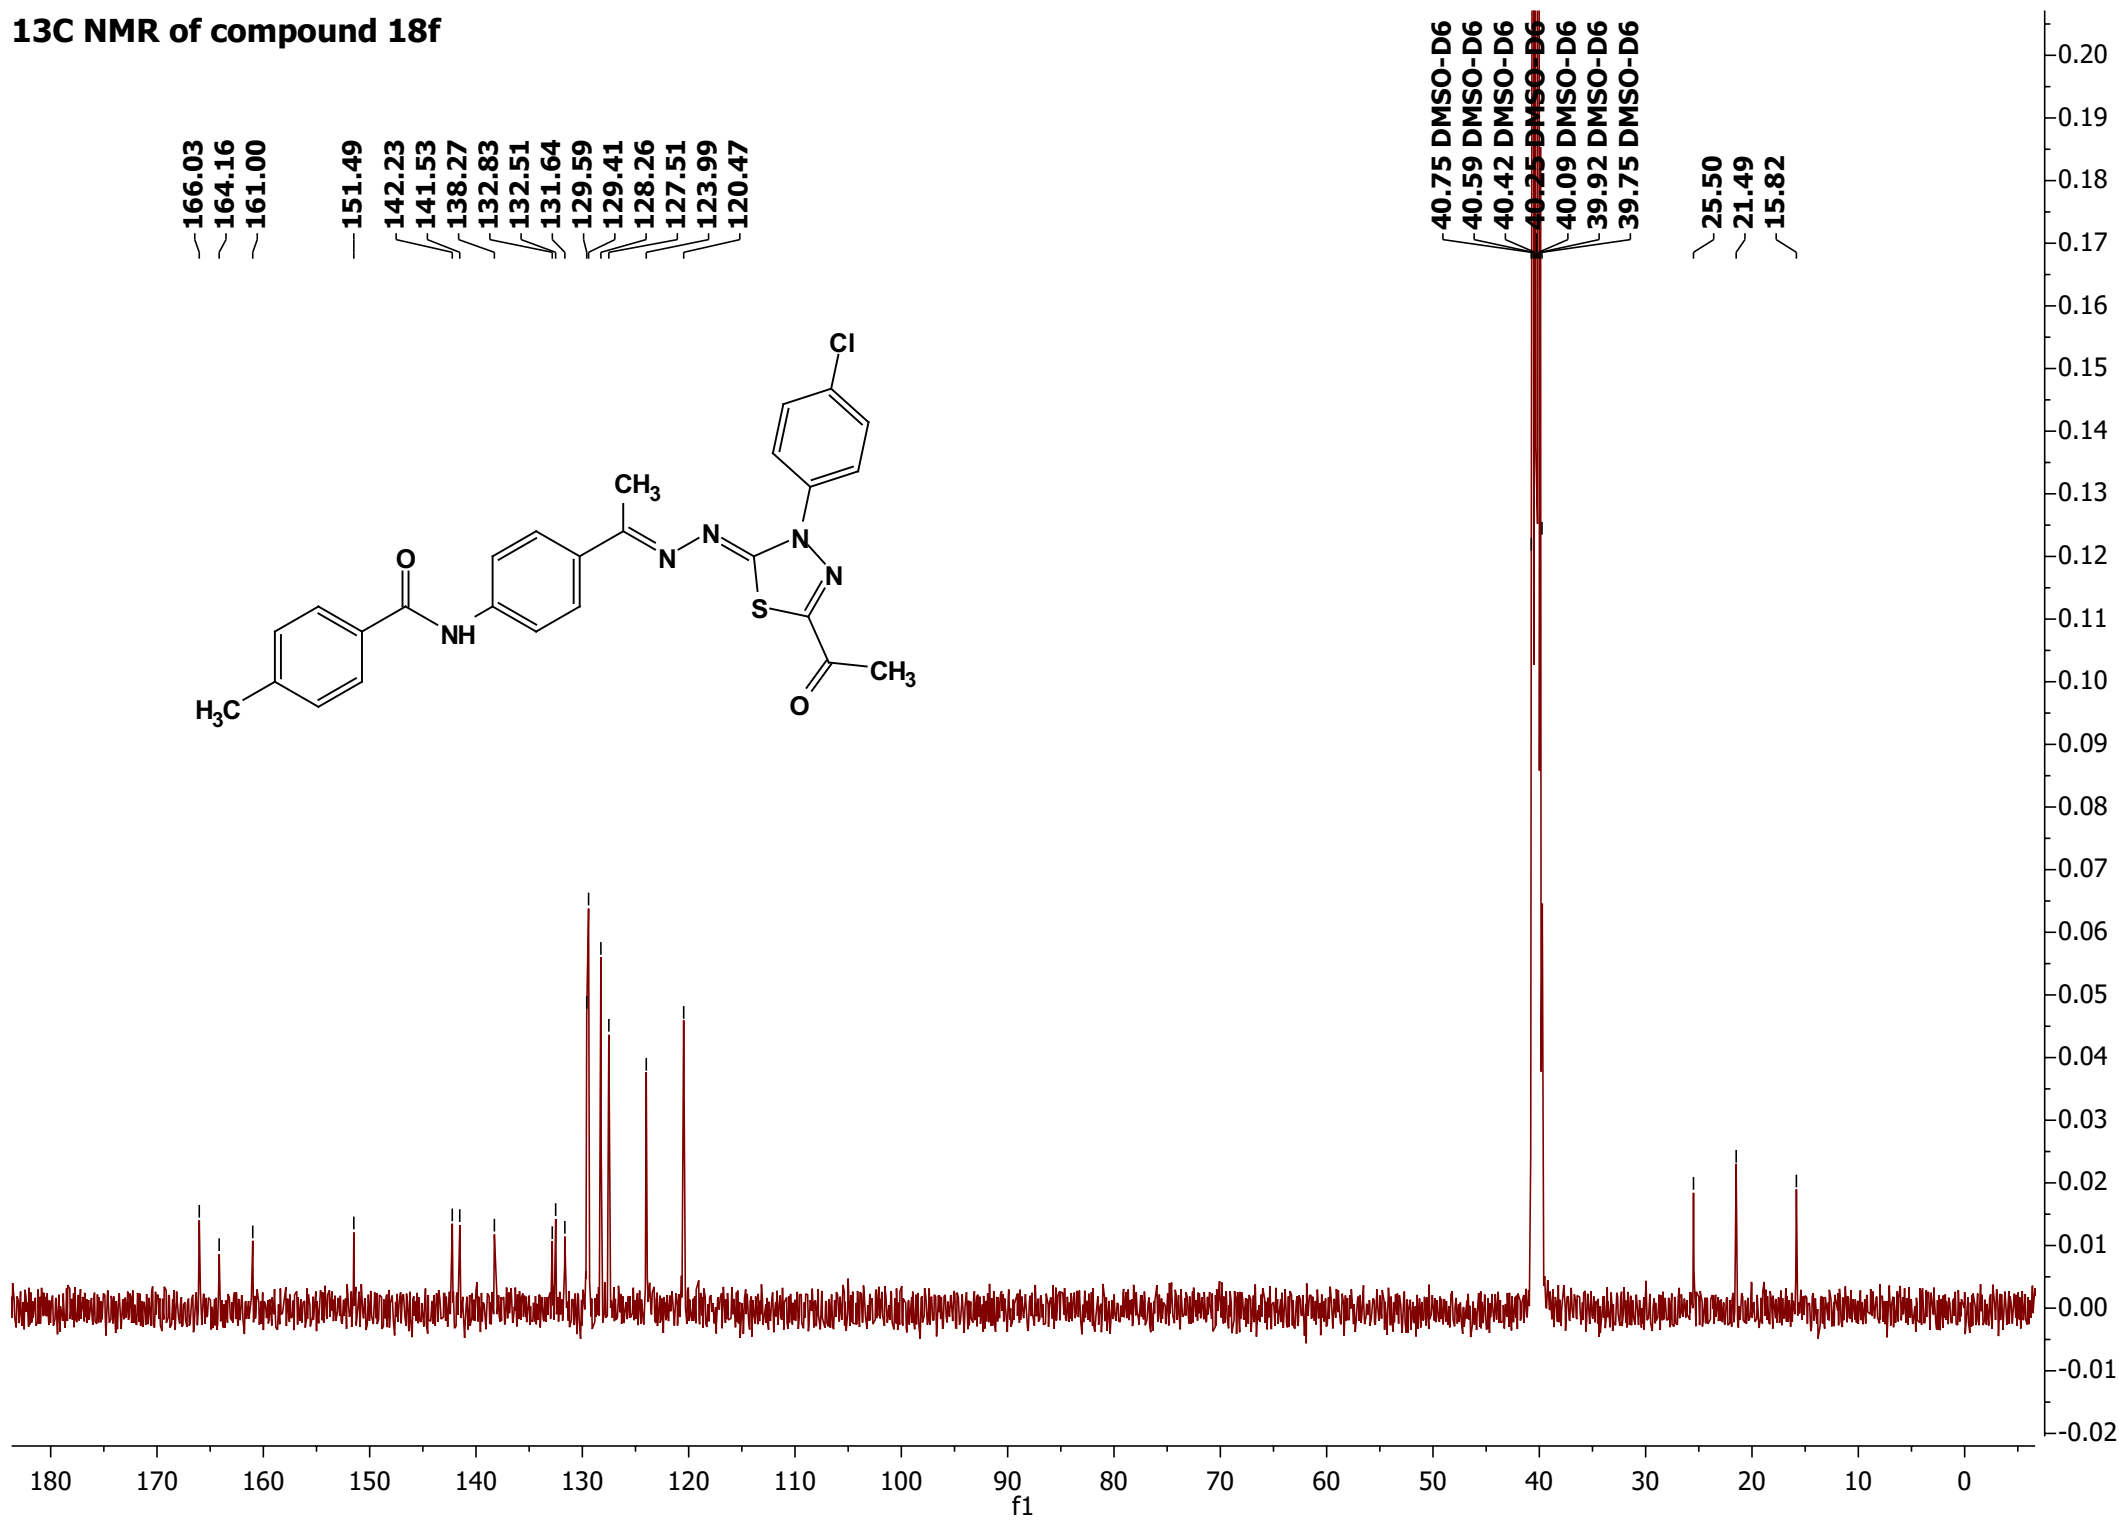

# <sup>13</sup>C NMR of compound 18f

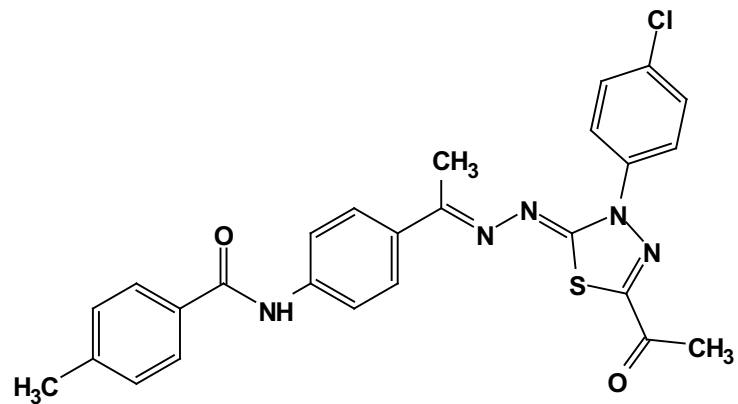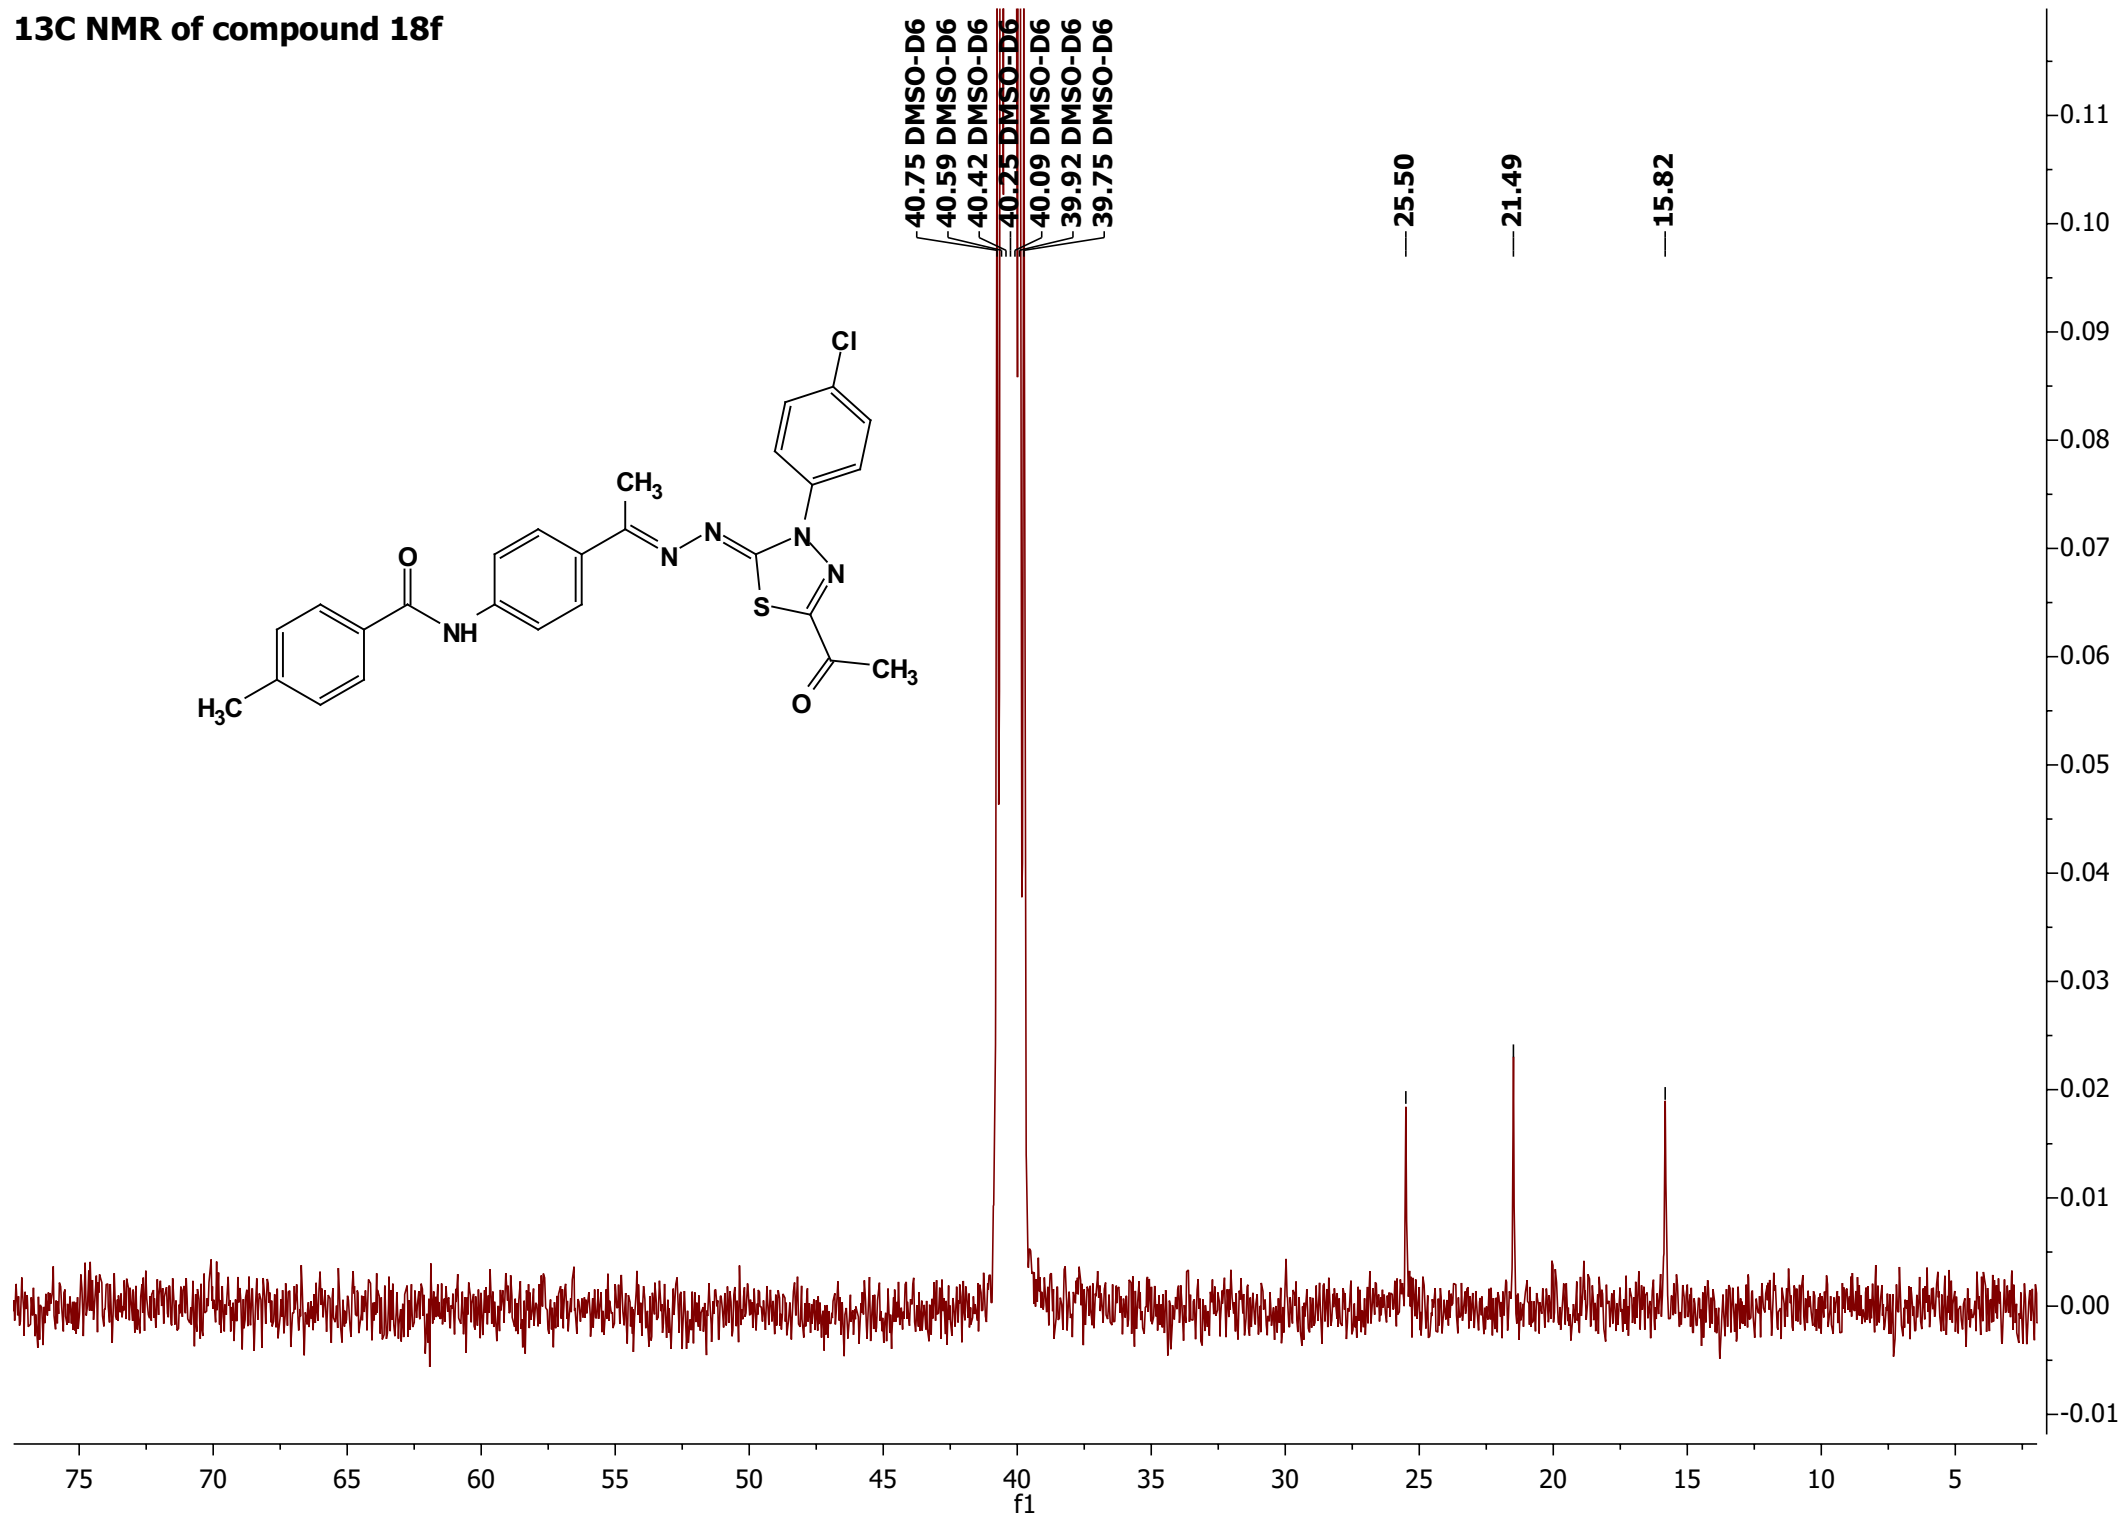

# <sup>13</sup>C NMR of compound 18f



—166.03

—164.16

—161.00

—151.49

~142.23

~141.53

—138.27

132.83

132.51

131.64

129.59

129.41

128.26

127.51

—123.99

—120.47

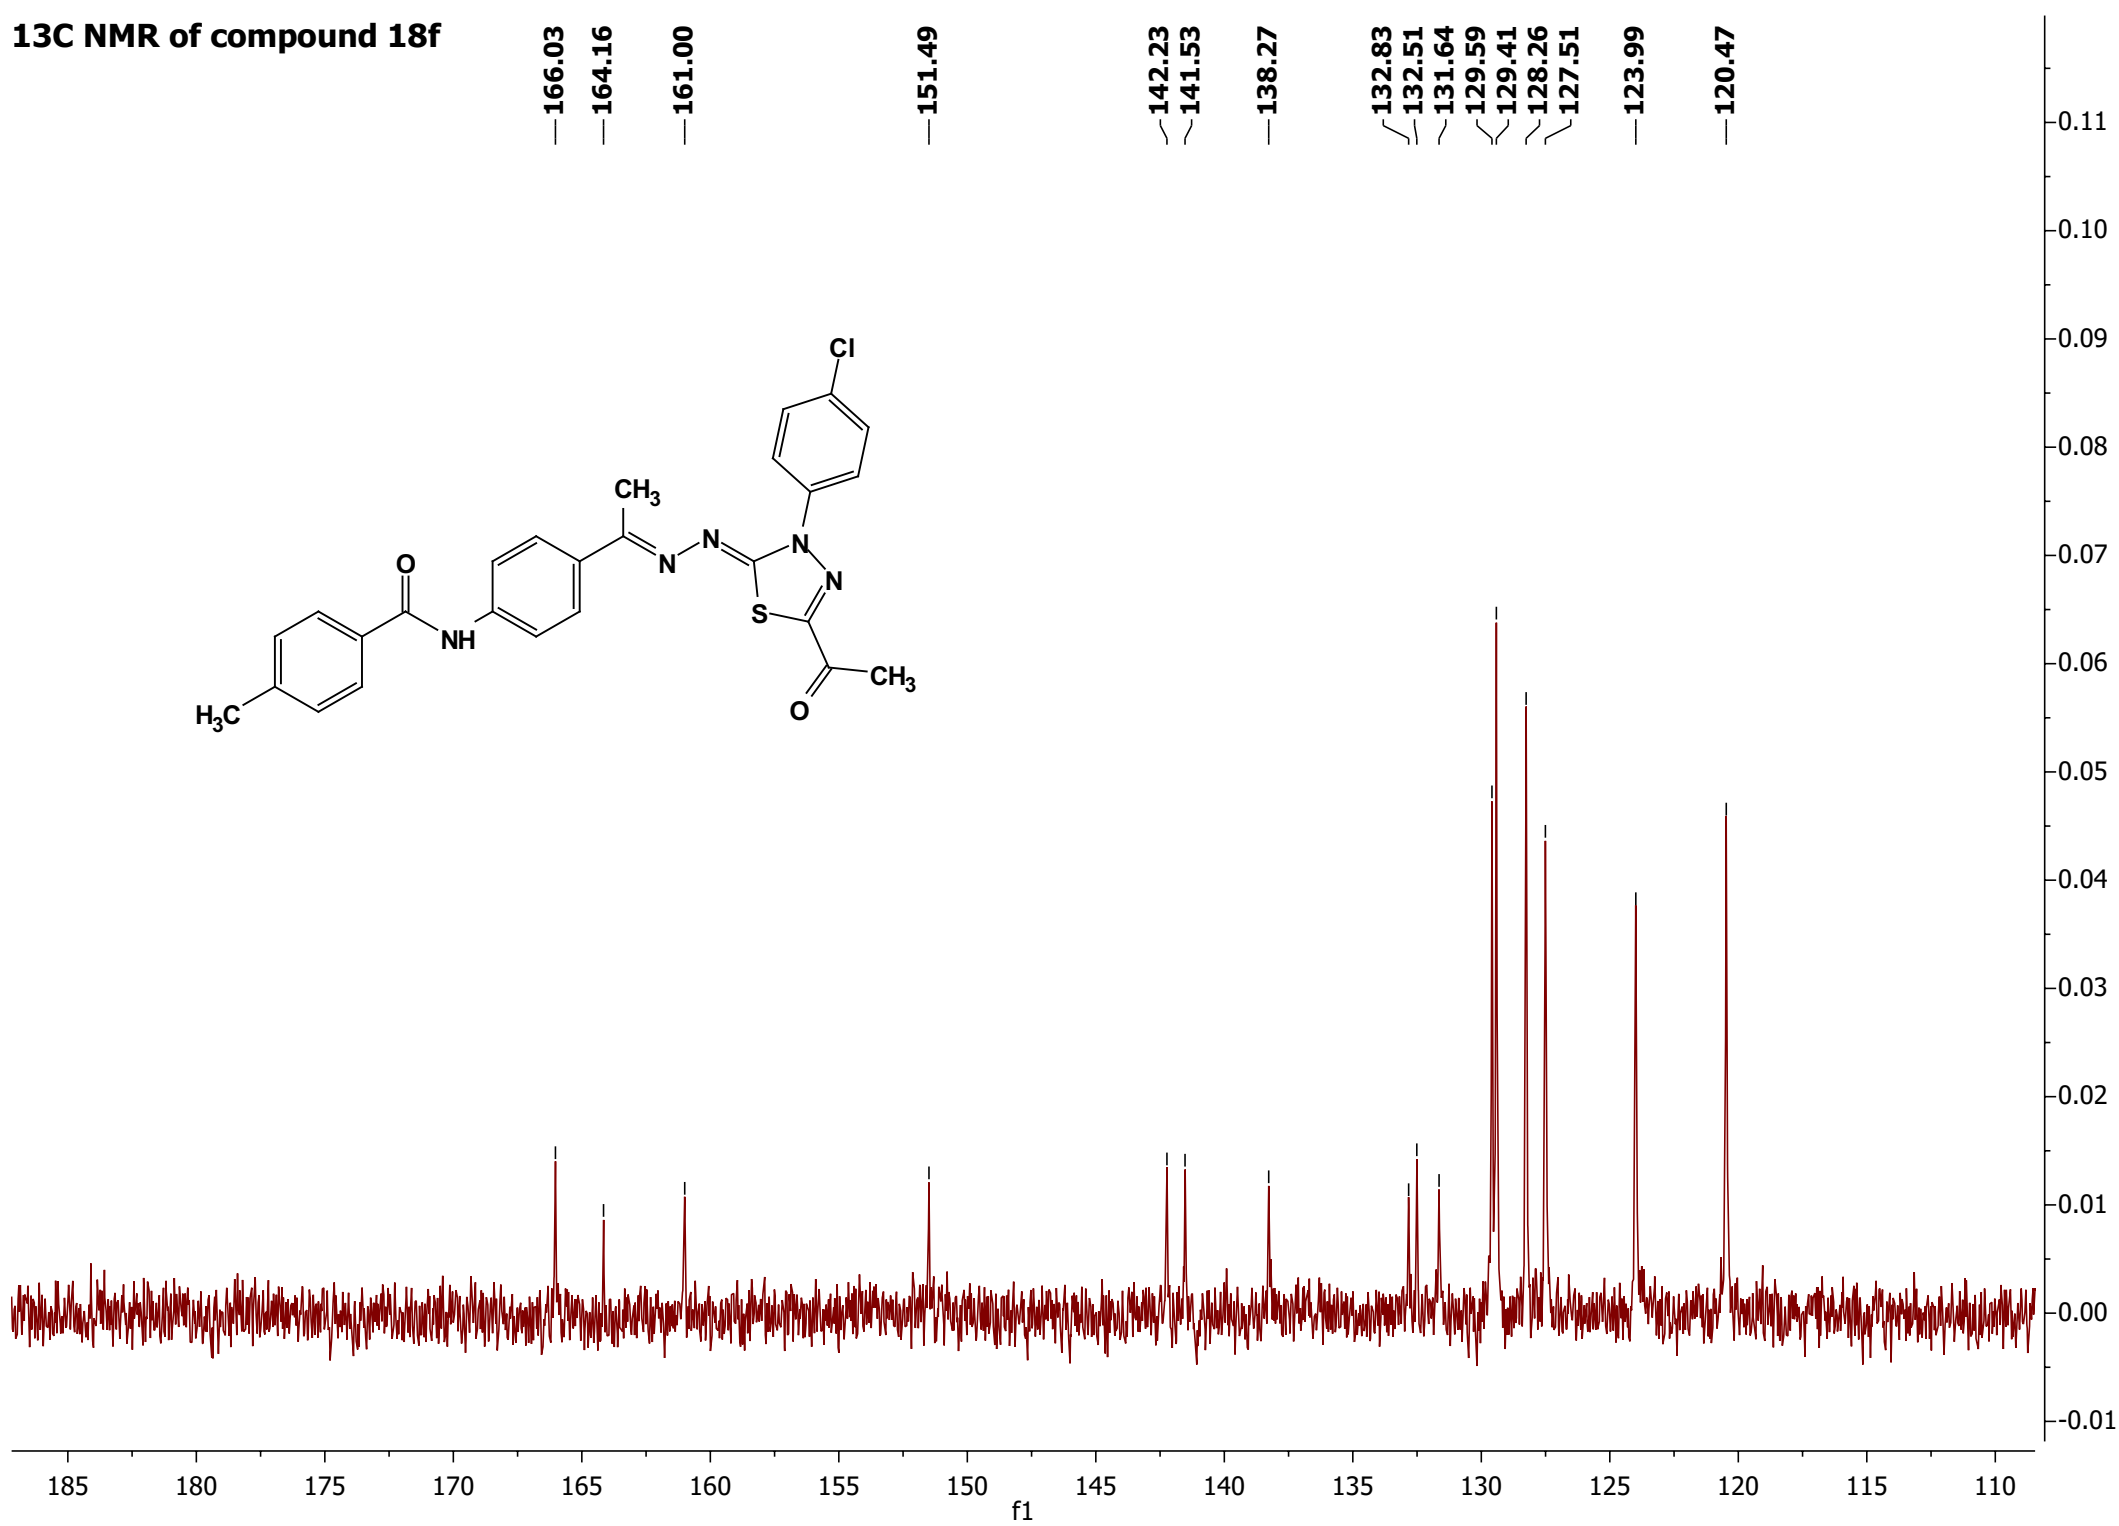

# Mass spec. of compound 18f

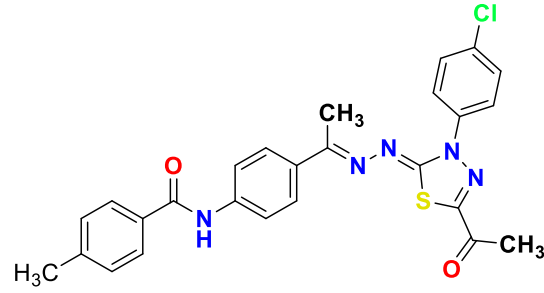

ibrahim-hassan-wm4 #156 RT: 2.63 AV: 1 SB: 26 1.21-1.34 , 0.87-1.14 NL: 1.18E3  
T: {0,0} + c EI Full ms [40.00-1000.00]

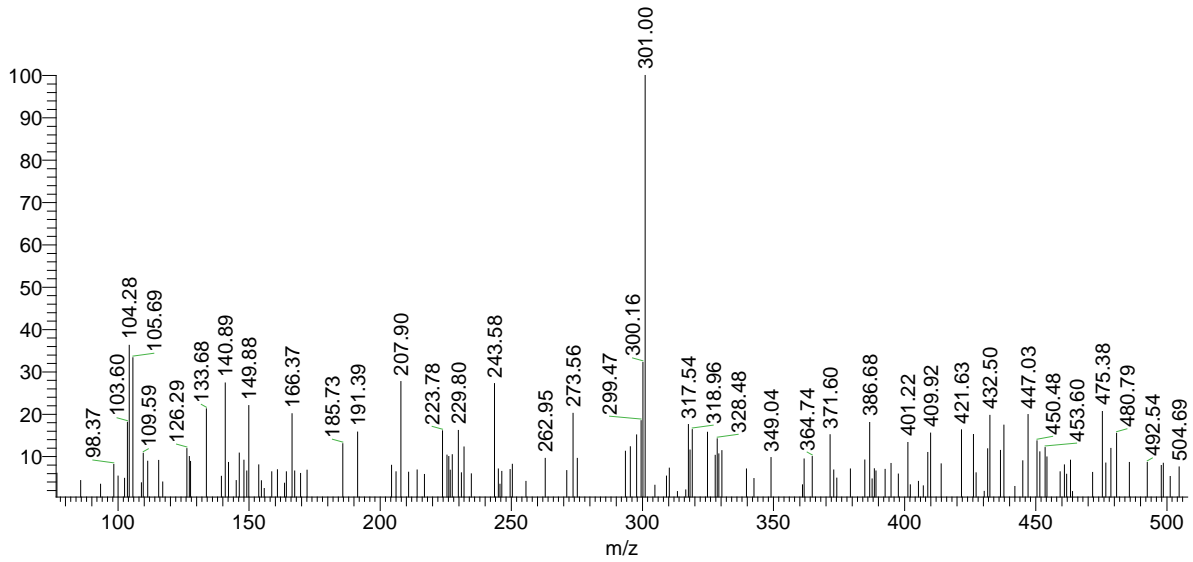

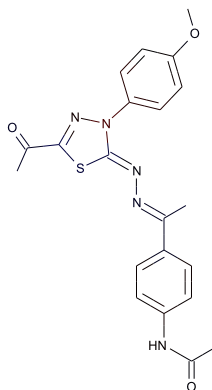

$C_{21}H_{21}N_5O_3S$

Molecular Weight: 423.48813

ALogP: 3.064

Rotatable Bonds: 6

Acceptors: 8

Donors: 1

## Model Prediction

Prediction: Non-Mutagen

Probability: 0.679

Enrichment: 1.22

Bayesian Score: -2.56

Mahalanobis Distance: 12.5

Mahalanobis Distance p-value: 7.78e-005

Prediction: Positive if the Bayesian score is above the estimated best cutoff value from minimizing the false positive and false negative rate.

Probability: The estimated probability that the sample is in the positive category. This assumes that the Bayesian score follows a normal distribution and is different from the prediction using a cutoff.

Enrichment: An estimate of enrichment, that is, the increased likelihood (versus random) of this sample being in the category.

Bayesian Score: The standard Laplacian-modified Bayesian score.

Mahalanobis Distance: The Mahalanobis distance (MD) is the distance to the center of the training data. The larger the MD, the less trustworthy the prediction.

Mahalanobis Distance p-value: The p-value gives the fraction of training data with an MD greater than or equal to the one for the given sample, assuming normally distributed data. The smaller the p-value, the less trustworthy the prediction. For highly non-normal X properties (e.g., fingerprints), the MD p-value is wildly inaccurate.

## Structural Similar Compounds

| Name               | C.I. Pigment Yellow 74 | 6358-31-2                                        | 1936-15-8                                                                                            |
|--------------------|------------------------|--------------------------------------------------|------------------------------------------------------------------------------------------------------|
| Structure          |                        |                                                  |                                                                                                      |
| Actual Endpoint    | Non-Mutagen            | Non-Mutagen                                      | Non-Mutagen                                                                                          |
| Predicted Endpoint | Non-Mutagen            | Non-Mutagen                                      | Non-Mutagen                                                                                          |
| Distance           | 0.559                  | 0.560                                            | 0.594                                                                                                |
| Reference          | EMIC                   | Kazius et. al., J. Med. Chem. (2005) 48, 312-320 | Helma, C., Cramer, T., Kramer, S., and De Raedt, L., J. Chem. Inf. Comput. Sci., 2004, pp. 1402-1411 |

## Model Applicability

Unknown features are fingerprint features in the query molecule, but not found or appearing too infrequently in the training set.

- All properties and OPS components are within expected ranges.

## Feature Contribution

### Top features for positive contribution

| Fingerprint | Bit/Smiles  | Feature Structure        | Score | Mutagen in training set |
|-------------|-------------|--------------------------|-------|-------------------------|
| SCFP_12     | -1325991669 | <br>[*]N1[*][*]C(=N1)[*] | 0.362 | 7 out of 8              |



|                                               |                   |                                                                                                                                            |              |                                |
|-----------------------------------------------|-------------------|--------------------------------------------------------------------------------------------------------------------------------------------|--------------|--------------------------------|
| SCFP_12                                       | 10                | 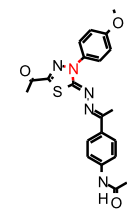<br>[*]N[*]N[*]                                          | 0.306        | 1774 out of 2287               |
| SCFP_12                                       | -1380909229       | <br>[*]N[*]N[*]c1:[cH]:[*]<br>:[c]([*]):[cH]:[cH]<br>:1 | 0.304        | 957 out of 1235                |
| <b>Top Features for negative contribution</b> |                   |                                                                                                                                            |              |                                |
| <b>Fingerprint</b>                            | <b>Bit/Smiles</b> | <b>Feature Structure</b>                                                                                                                   | <b>Score</b> | <b>Mutagen in training set</b> |
| SCFP_12                                       | -1630519606       | <br>[*]C1=[*][*]C(=[*])S1                               | -0.998       | 0 out of 3                     |
| SCFP_12                                       | -331724199        | <br>[*]N=C(C)[e]([*])<br>:[*]                          | -0.762       | 0 out of 2                     |
| SCFP_12                                       | 571795252         | <br>[*]C(=[*])C(=O)C                                  | -0.663       | 31 out of 107                  |

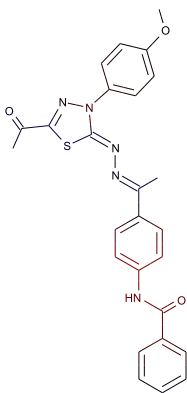

C<sub>26</sub>H<sub>23</sub>N<sub>5</sub>O<sub>3</sub>S

Molecular Weight: 485.55751

ALogP: 4.728

Rotatable Bonds: 7

Acceptors: 8

Donors: 1

## Model Prediction

**Prediction: Non-Mutagen**

Probability: 0.725

Enrichment: 1.3

Bayesian Score: -0.696

Mahalanobis Distance: 12.7

Mahalanobis Distance p-value: 1.91e-005

Prediction: Positive if the Bayesian score is above the estimated best cutoff value from minimizing the false positive and false negative rate.

Probability: The estimated probability that the sample is in the positive category. This assumes that the Bayesian score follows a normal distribution and is different from the prediction using a cutoff.

Enrichment: An estimate of enrichment, that is, the increased likelihood (versus random) of this sample being in the category.

Bayesian Score: The standard Laplacian-modified Bayesian score.

Mahalanobis Distance: The Mahalanobis distance (MD) is the distance to the center of the training data. The larger the MD, the less trustworthy the prediction.

Mahalanobis Distance p-value: The p-value gives the fraction of training data with an MD greater than or equal to the one for the given sample, assuming normally distributed data. The smaller the p-value, the less trustworthy the prediction. For highly non-normal X properties (e.g., fingerprints), the MD p-value is wildly inaccurate.

## Structural Similar Compounds

| Name               | 3567-69-9                                                                                            | 99522-79-9                                       | 83621-06-1                                       |
|--------------------|------------------------------------------------------------------------------------------------------|--------------------------------------------------|--------------------------------------------------|
| Structure          |                                                                                                      |                                                  |                                                  |
| Actual Endpoint    | Mutagen                                                                                              | Non-Mutagen                                      | Non-Mutagen                                      |
| Predicted Endpoint | Non-Mutagen                                                                                          | Non-Mutagen                                      | Non-Mutagen                                      |
| Distance           | 0.588                                                                                                | 0.612                                            | 0.613                                            |
| Reference          | Helma, C., Cramer, T., Kramer, S., and De Raedt, L., J. Chem. Inf. Comput. Sci., 2004, pp. 1402-1411 | Kazius et. al., J. Med. Chem. (2005) 48, 312-320 | Kazius et. al., J. Med. Chem. (2005) 48, 312-320 |

## Model Applicability

Unknown features are fingerprint features in the query molecule, but not found or appearing too infrequently in the training set.

- All properties and OPS components are within expected ranges.

## Feature Contribution

### Top features for positive contribution

| Fingerprint | Bit/Smiles | Feature Structure                                                     | Score | Mutagen in training set |
|-------------|------------|-----------------------------------------------------------------------|-------|-------------------------|
| SCFP_12     | 555539852  | <br>[*]:[cH]:[c](:[cH])<br>])C(=O)N[c]1:[cH]:[c<br>H]:[*]:[cH]:[cH]:1 | 0.447 | 22 out of 24            |

|                                               |                   |                                                                                                                                                                    |              |                                |
|-----------------------------------------------|-------------------|--------------------------------------------------------------------------------------------------------------------------------------------------------------------|--------------|--------------------------------|
| SCFP_12                                       | 818445224         | 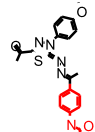<br><chem>[*][c]1:[cH]:[cH]([C](NC(=O)[c](:[*]):[*])[cH]:[cH]:1</chem>          | 0.434        | 12 out of 13                   |
| SCFP_12                                       | 124026986         | <br><chem>[*]:[cH]:[c](:[cH]([C](=O)N[c](:[*]):[*])])C(=O)N[c](:[*]):[*]</chem> | 0.429        | 33 out of 37                   |
| <b>Top Features for negative contribution</b> |                   |                                                                                                                                                                    |              |                                |
| <b>Fingerprint</b>                            | <b>Bit/Smiles</b> | <b>Feature Structure</b>                                                                                                                                           | <b>Score</b> | <b>Mutagen in training set</b> |
| SCFP_12                                       | -1630519606       | <br><chem>[*]C1=[*][*]C(=[*])S1</chem>                                          | -0.998       | 0 out of 3                     |
| SCFP_12                                       | -331724199        | <br><chem>[*]N=C(C)[c](:[*]):[*]</chem>                                        | -0.762       | 0 out of 2                     |
| SCFP_12                                       | 571795252         | <br><chem>[*]C(=[*])C(=O)C</chem>                                             | -0.663       | 31 out of 107                  |

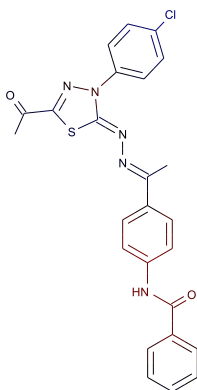

$C_{25}H_{20}ClN_5O_2S$

Molecular Weight: 489.97659

ALogP: 5.409

Rotatable Bonds: 6

Acceptors: 7

Donors: 1

## Model Prediction

Prediction: Non-Mutagen

Probability: 0.668

Enrichment: 1.2

Bayesian Score: -2.95

Mahalanobis Distance: 12.6

Mahalanobis Distance p-value: 4.07e-005

Prediction: Positive if the Bayesian score is above the estimated best cutoff value from minimizing the false positive and false negative rate.

Probability: The estimated probability that the sample is in the positive category. This assumes that the Bayesian score follows a normal distribution and is different from the prediction using a cutoff.

Enrichment: An estimate of enrichment, that is, the increased likelihood (versus random) of this sample being in the category.

Bayesian Score: The standard Laplacian-modified Bayesian score.

Mahalanobis Distance: The Mahalanobis distance (MD) is the distance to the center of the training data. The larger the MD, the less trustworthy the prediction.

Mahalanobis Distance p-value: The p-value gives the fraction of training data with an MD greater than or equal to the one for the given sample, assuming normally distributed data. The smaller the p-value, the less trustworthy the prediction. For highly non-normal X properties (e.g., fingerprints), the MD p-value is wildly inaccurate.

## Structural Similar Compounds

| Name               | 83621-06-1                                       | FLUTICASONE | 110004-69-8                                      |
|--------------------|--------------------------------------------------|-------------|--------------------------------------------------|
| Structure          |                                                  |             |                                                  |
| Actual Endpoint    | Non-Mutagen                                      | Non-Mutagen | Mutagen                                          |
| Predicted Endpoint | Non-Mutagen                                      | Non-Mutagen | Mutagen                                          |
| Distance           | 0.614                                            | 0.628       | 0.629                                            |
| Reference          | Kazius et. al., J. Med. Chem. (2005) 48, 312-320 | PDR 1994    | Kazius et. al., J. Med. Chem. (2005) 48, 312-320 |

## Model Applicability

Unknown features are fingerprint features in the query molecule, but not found or appearing too infrequently in the training set.

- All properties and OPS components are within expected ranges.

## Feature Contribution

### Top features for positive contribution

| Fingerprint | Bit/Smiles | Feature Structure                                            | Score | Mutagen in training set |
|-------------|------------|--------------------------------------------------------------|-------|-------------------------|
| SCFP_12     | 555539852  | <br>[*]:[cH]:[c](:[cH]N)C(=O)N[c]1:[cH]:[cH]:[*]:[cH]:[cH]:1 | 0.447 | 22 out of 24            |

|                                               |                   |                                                                                                                                                            |              |                                |
|-----------------------------------------------|-------------------|------------------------------------------------------------------------------------------------------------------------------------------------------------|--------------|--------------------------------|
| SCFP_12                                       | 818445224         | 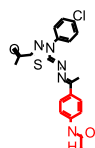<br><chem>[*][c]1:[cH]:[cH]([C](NC(=O)[c](:[*]):[*]):[cH]:[cH]:1</chem> | 0.434        | 12 out of 13                   |
| SCFP_12                                       | 2096901122        | <br><chem>[*]:[cH]:[c](NC(=O)[c](:[*]):[*])</chem>                      | 0.429        | 33 out of 37                   |
| <b>Top Features for negative contribution</b> |                   |                                                                                                                                                            |              |                                |
| <b>Fingerprint</b>                            | <b>Bit/Smiles</b> | <b>Feature Structure</b>                                                                                                                                   | <b>Score</b> | <b>Mutagen in training set</b> |
| SCFP_12                                       | -1630519606       | <br><chem>[*]C1=[*][*]C(=[*])S1</chem>                                  | -0.998       | 0 out of 3                     |
| SCFP_12                                       | -331724199        | <br><chem>[*]N=C(C)[c](:[*])</chem>                                    | -0.762       | 0 out of 2                     |
| SCFP_12                                       | 571795252         | <br><chem>[*]C(=[*])C(=O)C</chem>                                     | -0.663       | 31 out of 107                  |

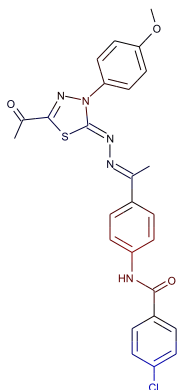

$C_{26}H_{22}ClN_5O_3S$

Molecular Weight: 520.00258

ALogP: 5.392

Rotatable Bonds: 7

Acceptors: 8

Donors: 1

## Model Prediction

Prediction: Non-Mutagen

Probability: 0.643

Enrichment: 1.15

Bayesian Score: -3.78

Mahalanobis Distance: 13

Mahalanobis Distance p-value: 4.69e-006

Prediction: Positive if the Bayesian score is above the estimated best cutoff value from minimizing the false positive and false negative rate.

Probability: The estimated probability that the sample is in the positive category. This assumes that the Bayesian score follows a normal distribution and is different from the prediction using a cutoff.

Enrichment: An estimate of enrichment, that is, the increased likelihood (versus random) of this sample being in the category.

Bayesian Score: The standard Laplacian-modified Bayesian score.

Mahalanobis Distance: The Mahalanobis distance (MD) is the distance to the center of the training data. The larger the MD, the less trustworthy the prediction.

Mahalanobis Distance p-value: The p-value gives the fraction of training data with an MD greater than or equal to the one for the given sample, assuming normally distributed data. The smaller the p-value, the less trustworthy the prediction. For highly non-normal X properties (e.g., fingerprints), the MD p-value is wildly inaccurate.

## Structural Similar Compounds

| Name               | 3567-69-9                                                                                            | 83621-06-1                                       | 6471-49-4                                        |
|--------------------|------------------------------------------------------------------------------------------------------|--------------------------------------------------|--------------------------------------------------|
| Structure          |                                                                                                      |                                                  |                                                  |
| Actual Endpoint    | Mutagen                                                                                              | Non-Mutagen                                      | Mutagen                                          |
| Predicted Endpoint | Non-Mutagen                                                                                          | Non-Mutagen                                      | Mutagen                                          |
| Distance           | 0.618                                                                                                | 0.633                                            | 0.641                                            |
| Reference          | Helma, C., Cramer, T., Kramer, S., and De Raedt, L., J. Chem. Inf. Comput. Sci., 2004, pp. 1402-1411 | Kazius et. al., J. Med. Chem. (2005) 48, 312-320 | Kazius et. al., J. Med. Chem. (2005) 48, 312-320 |

## Model Applicability

Unknown features are fingerprint features in the query molecule, but not found or appearing too infrequently in the training set.

- All properties and OPS components are within expected ranges.

## Feature Contribution

### Top features for positive contribution

| Fingerprint | Bit/Smiles | Feature Structure                                            | Score | Mutagen in training set |
|-------------|------------|--------------------------------------------------------------|-------|-------------------------|
| SCFP_12     | 555539852  | <br>[*]:[cH]:[c](:[cH]N)C(=O)N[c]1:[cH]:[cH]:[*]:[cH]:[cH]:1 | 0.447 | 22 out of 24            |

|                                               |                   |                                                                                                                                                            |              |                                |
|-----------------------------------------------|-------------------|------------------------------------------------------------------------------------------------------------------------------------------------------------|--------------|--------------------------------|
| SCFP_12                                       | 818445224         | 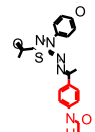<br><chem>[*][c]1:[cH]:[cH]:[c]1(NC(=O)[c](:[*]):[*])[cH]:[cH]:1</chem> | 0.434        | 12 out of 13                   |
| SCFP_12                                       | 2096901122        | <br><chem>[*]:[cH]:[c](NC(=O)[c]([*]):[*])[cH]:[*]</chem>               | 0.429        | 33 out of 37                   |
| <b>Top Features for negative contribution</b> |                   |                                                                                                                                                            |              |                                |
| <b>Fingerprint</b>                            | <b>Bit/Smiles</b> | <b>Feature Structure</b>                                                                                                                                   | <b>Score</b> | <b>Mutagen in training set</b> |
| SCFP_12                                       | -1630519606       | <br><chem>[*]C1=[*][*]C(=[*])S1</chem>                                  | -0.998       | 0 out of 3                     |
| SCFP_12                                       | -331724199        | <br><chem>[*]N=C(C)[c]([*]):[*]</chem>                                | -0.762       | 0 out of 2                     |
| SCFP_12                                       | 571795252         | <br><chem>[*]C(=[*])C(=O)C</chem>                                     | -0.663       | 31 out of 107                  |

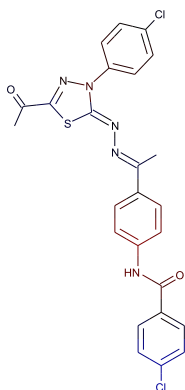

$C_{25}H_{19}Cl_2N_5O_2S$

Molecular Weight: 524.42166

ALogP: 6.073

Rotatable Bonds: 6

Acceptors: 7

Donors: 1

## Model Prediction

Prediction: Non-Mutagen

Probability: 0.639

Enrichment: 1.14

Bayesian Score: -3.91

Mahalanobis Distance: 12.6

Mahalanobis Distance p-value: 3.32e-005

Prediction: Positive if the Bayesian score is above the estimated best cutoff value from minimizing the false positive and false negative rate.

Probability: The estimated probability that the sample is in the positive category. This assumes that the Bayesian score follows a normal distribution and is different from the prediction using a cutoff.

Enrichment: An estimate of enrichment, that is, the increased likelihood (versus random) of this sample being in the category.

Bayesian Score: The standard Laplacian-modified Bayesian score.

Mahalanobis Distance: The Mahalanobis distance (MD) is the distance to the center of the training data. The larger the MD, the less trustworthy the prediction.

Mahalanobis Distance p-value: The p-value gives the fraction of training data with an MD greater than or equal to the one for the given sample, assuming normally distributed data. The smaller the p-value, the less trustworthy the prediction. For highly non-normal X properties (e.g., fingerprints), the MD p-value is wildly inaccurate.

## Structural Similar Compounds

| Name               | 83621-06-1                                       | 633-03-4                                         | 316-42-7                                         |
|--------------------|--------------------------------------------------|--------------------------------------------------|--------------------------------------------------|
| Structure          |                                                  |                                                  |                                                  |
| Actual Endpoint    | Non-Mutagen                                      | Mutagen                                          | Non-Mutagen                                      |
| Predicted Endpoint | Non-Mutagen                                      | Mutagen                                          | Non-Mutagen                                      |
| Distance           | 0.670                                            | 0.671                                            | 0.675                                            |
| Reference          | Kazius et. al., J. Med. Chem. (2005) 48, 312-320 | Kazius et. al., J. Med. Chem. (2005) 48, 312-320 | Kazius et. al., J. Med. Chem. (2005) 48, 312-320 |

## Model Applicability

Unknown features are fingerprint features in the query molecule, but not found or appearing too infrequently in the training set.

- All properties and OPS components are within expected ranges.

## Feature Contribution

### Top features for positive contribution

| Fingerprint | Bit/Smiles | Feature Structure                                                    | Score | Mutagen in training set |
|-------------|------------|----------------------------------------------------------------------|-------|-------------------------|
| SCFP_12     | 555539852  | <br>[*]:[cH]:[c](:[cH]<br>))C(=O)N[c]1:[cH]:[c<br>H]:[*]:[cH]:[cH]:1 | 0.447 | 22 out of 24            |



| SCFP_12                                | 818445224   | 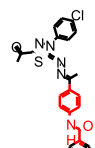<br>[*][c]1:[cH]:[cH] (NC(=O)[c](:[*]):[*] ):[cH]:[cH]:1 | 0.434  | 12 out of 13            |
|----------------------------------------|-------------|---------------------------------------------------------------------------------------------------------------------------------------------|--------|-------------------------|
| SCFP_12                                | 2096901122  | <br>[*]:[cH]:[c](NC(=O)[c] )l(:[*]):[*]:[cH]:[*] ]       | 0.429  | 33 out of 37            |
| Top Features for negative contribution |             |                                                                                                                                             |        |                         |
| Fingerprint                            | Bit/Smiles  | Feature Structure                                                                                                                           | Score  | Mutagen in training set |
| SCFP_12                                | -1630519606 | <br>[*]C1=[*][*]C(=[*])S1                                | -0.998 | 0 out of 3              |
| SCFP_12                                | -331724199  | <br>[*]N=C(C)[c](c(:[*]) ):[*]                          | -0.762 | 0 out of 2              |
| SCFP_12                                | 571795252   | <br>[*]C(=[*])C(=O)C                                   | -0.663 | 31 out of 107           |

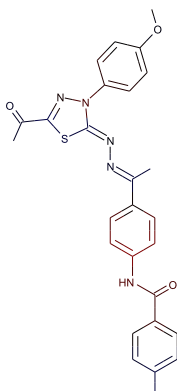

$C_{27}H_{25}N_5O_3S$

Molecular Weight: 499.58409

ALogP: 5.214

Rotatable Bonds: 7

Acceptors: 8

Donors: 1

## Model Prediction

Prediction: Non-Mutagen

Probability: 0.711

Enrichment: 1.27

Bayesian Score: -1.3

Mahalanobis Distance: 12.7

Mahalanobis Distance p-value: 1.81e-005

Prediction: Positive if the Bayesian score is above the estimated best cutoff value from minimizing the false positive and false negative rate.

Probability: The estimated probability that the sample is in the positive category. This assumes that the Bayesian score follows a normal distribution and is different from the prediction using a cutoff.

Enrichment: An estimate of enrichment, that is, the increased likelihood (versus random) of this sample being in the category.

Bayesian Score: The standard Laplacian-modified Bayesian score.

Mahalanobis Distance: The Mahalanobis distance (MD) is the distance to the center of the training data. The larger the MD, the less trustworthy the prediction.

Mahalanobis Distance p-value: The p-value gives the fraction of training data with an MD greater than or equal to the one for the given sample, assuming normally distributed data. The smaller the p-value, the less trustworthy the prediction. For highly non-normal X properties (e.g., fingerprints), the MD p-value is wildly inaccurate.

## Structural Similar Compounds

| Name               | 3567-69-9                                                                                            | 110004-69-8                                      | 6471-49-4                                        |
|--------------------|------------------------------------------------------------------------------------------------------|--------------------------------------------------|--------------------------------------------------|
| Structure          |                                                                                                      |                                                  |                                                  |
| Actual Endpoint    | Mutagen                                                                                              | Mutagen                                          | Mutagen                                          |
| Predicted Endpoint | Non-Mutagen                                                                                          | Mutagen                                          | Mutagen                                          |
| Distance           | 0.608                                                                                                | 0.634                                            | 0.637                                            |
| Reference          | Helma, C., Cramer, T., Kramer, S., and De Raedt, L., J. Chem. Inf. Comput. Sci., 2004, pp. 1402-1411 | Kazius et. al., J. Med. Chem. (2005) 48, 312-320 | Kazius et. al., J. Med. Chem. (2005) 48, 312-320 |

## Model Applicability

Unknown features are fingerprint features in the query molecule, but not found or appearing too infrequently in the training set.

- All properties and OPS components are within expected ranges.

## Feature Contribution

### Top features for positive contribution

| Fingerprint | Bit/Smiles | Feature Structure                                                     | Score | Mutagen in training set |
|-------------|------------|-----------------------------------------------------------------------|-------|-------------------------|
| SCFP_12     | 555539852  | <br>[*]:[cH]:[c](:[cH])<br>])C(=O)N[c]1:[cH]:[c<br>H]:[*]:[cH]:[cH]:1 | 0.447 | 22 out of 24            |

| SCFP_12                                       | 818445224   | 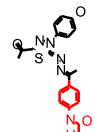<br><chem>[*][c]1:[cH]:[cH]:[*]<br/>(NC(=O)[c](:[*]):[*]<br/>):[cH]:[cH]:1</chem> | 0.434  | 12 out of 13            |
|-----------------------------------------------|-------------|----------------------------------------------------------------------------------------------------------------------------------------------------------------------|--------|-------------------------|
| SCFP_12                                       | 124026986   | <br><chem>[*]:[cH]:[c](:[cH]<br/>))C(=O)N[c](:[*]):[*]<br/>]</chem>               | 0.429  | 33 out of 37            |
| <b>Top Features for negative contribution</b> |             |                                                                                                                                                                      |        |                         |
| Fingerprint                                   | Bit/Smiles  | Feature Structure                                                                                                                                                    | Score  | Mutagen in training set |
| SCFP_12                                       | -1630519606 | <br><chem>[*]C1=[*][*]C(=[*])S1</chem>                                            | -0.998 | 0 out of 3              |
| SCFP_12                                       | -1555568408 | <br><chem>[*]NC(=O)[c]1:[cH]:[c<br/>H]:[c](C):[cH]:[cH]:<br/>1</chem>            | -0.762 | 0 out of 2              |
| SCFP_12                                       | -331724199  | <br><chem>[*]N=C(/C)[c](:[*]<br/>):[*]</chem>                                   | -0.762 | 0 out of 2              |

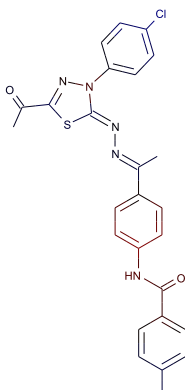

$C_{26}H_{22}ClN_5O_2S$

Molecular Weight: 504.00318

ALogP: 5.895

Rotatable Bonds: 6

Acceptors: 7

Donors: 1

## Model Prediction

Prediction: Non-Mutagen

Probability: 0.634

Enrichment: 1.14

Bayesian Score: -4.05

Mahalanobis Distance: 12.6

Mahalanobis Distance p-value: 3.63e-005

Prediction: Positive if the Bayesian score is above the estimated best cutoff value from minimizing the false positive and false negative rate.

Probability: The estimated probability that the sample is in the positive category. This assumes that the Bayesian score follows a normal distribution and is different from the prediction using a cutoff.

Enrichment: An estimate of enrichment, that is, the increased likelihood (versus random) of this sample being in the category.

Bayesian Score: The standard Laplacian-modified Bayesian score.

Mahalanobis Distance: The Mahalanobis distance (MD) is the distance to the center of the training data. The larger the MD, the less trustworthy the prediction.

Mahalanobis Distance p-value: The p-value gives the fraction of training data with an MD greater than or equal to the one for the given sample, assuming normally distributed data. The smaller the p-value, the less trustworthy the prediction. For highly non-normal X properties (e.g., fingerprints), the MD p-value is wildly inaccurate.

## Structural Similar Compounds

| Name               | 83621-06-1                                       | 110004-69-8                                      | 633-03-4                                         |
|--------------------|--------------------------------------------------|--------------------------------------------------|--------------------------------------------------|
| Structure          |                                                  |                                                  |                                                  |
| Actual Endpoint    | Non-Mutagen                                      | Mutagen                                          | Mutagen                                          |
| Predicted Endpoint | Non-Mutagen                                      | Mutagen                                          | Mutagen                                          |
| Distance           | 0.654                                            | 0.654                                            | 0.663                                            |
| Reference          | Kazius et. al., J. Med. Chem. (2005) 48, 312-320 | Kazius et. al., J. Med. Chem. (2005) 48, 312-320 | Kazius et. al., J. Med. Chem. (2005) 48, 312-320 |

## Model Applicability

Unknown features are fingerprint features in the query molecule, but not found or appearing too infrequently in the training set.

1. All properties and OPS components are within expected ranges.

## Feature Contribution

### Top features for positive contribution

| Fingerprint | Bit/Smiles | Feature Structure                                                                                           | Score | Mutagen in training set |
|-------------|------------|-------------------------------------------------------------------------------------------------------------|-------|-------------------------|
| SCFP_12     | 555539852  | <br><chem>[*]:[cH]:[c](:[cH])</chem><br><chem>]C(=O)N[c]1:[cH]:[c</chem><br><chem>H]:[*]:[cH]:[cH]:1</chem> | 0.447 | 22 out of 24            |

|                                               |                   |                                                                                                                                                                                     |              |                                |
|-----------------------------------------------|-------------------|-------------------------------------------------------------------------------------------------------------------------------------------------------------------------------------|--------------|--------------------------------|
| SCFP_12                                       | 818445224         | 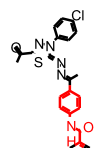<br><chem>[*][c]1:[cH]:[cH]:[cH]:[cH]:[cH]1(NC(=O)[c](:[*]):[*])[c](:[*]):[*])[cH]:[cH]:1</chem> | 0.434        | 12 out of 13                   |
| SCFP_12                                       | 124026986         | <br><chem>[*]:[cH]:[c](:[cH]:[cH]:[cH]:[cH]:[cH]1)C(=O)N[c](:[*]):[*]</chem>                     | 0.429        | 33 out of 37                   |
| <b>Top Features for negative contribution</b> |                   |                                                                                                                                                                                     |              |                                |
| <b>Fingerprint</b>                            | <b>Bit/Smiles</b> | <b>Feature Structure</b>                                                                                                                                                            | <b>Score</b> | <b>Mutagen in training set</b> |
| SCFP_12                                       | -1630519606       | <br><chem>[*]C1=[*][*]C(=[*])S1</chem>                                                           | -0.998       | 0 out of 3                     |
| SCFP_12                                       | -331724199        | <br><chem>[*]N=C(C)[c](:[*]):[*]</chem>                                                         | -0.762       | 0 out of 2                     |
| SCFP_12                                       | -1555568408       | <br><chem>[*]NC(=O)[c]1:[cH]:[cH]:[c]H:[c](C):[cH]:[cH]:1</chem>                               | -0.762       | 0 out of 2                     |

# Sorafenib

# TOPKAT\_Ames\_Mutagenicity

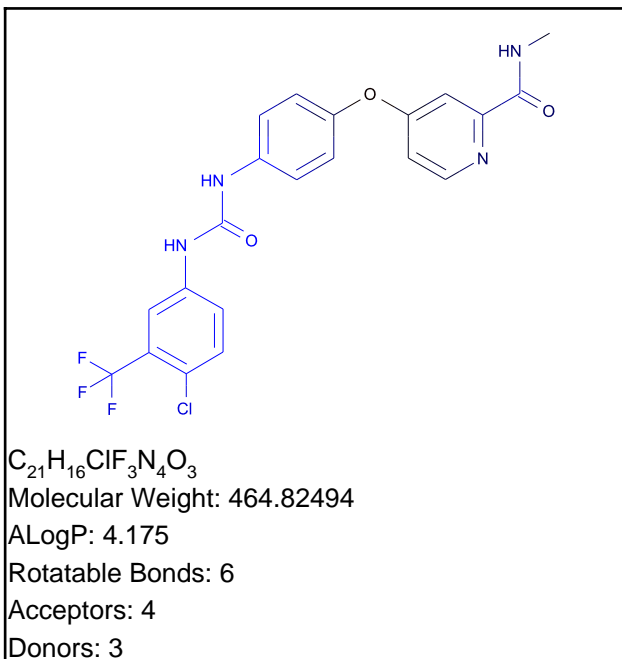

## Model Prediction

Prediction: Non-Mutagen

Probability: 0.0531

Enrichment: 0.0951

Bayesian Score: -19.7

Mahalanobis Distance: 13.1

Mahalanobis Distance p-value: 2.73e-006

Prediction: Positive if the Bayesian score is above the estimated best cutoff value from minimizing the false positive and false negative rate.

Probability: The estimated probability that the sample is in the positive category. This assumes that the Bayesian score follows a normal distribution and is different from the prediction using a cutoff.

Enrichment: An estimate of enrichment, that is, the increased likelihood (versus random) of this sample being in the category.

Bayesian Score: The standard Laplacian-modified Bayesian score.

Mahalanobis Distance: The Mahalanobis distance (MD) is the distance to the center of the training data. The larger the MD, the less trustworthy the prediction.

Mahalanobis Distance p-value: The p-value gives the fraction of training data with an MD greater than or equal to the one for the given sample, assuming normally distributed data. The smaller the p-value, the less trustworthy the prediction. For highly non-normal X properties (e.g., fingerprints), the MD p-value is wildly inaccurate.

## Structural Similar Compounds

| Name               | GLYBURIDE                                                                           | 38914-96-4                                                                          | 93957-54-1                                                                                                                                                          |
|--------------------|-------------------------------------------------------------------------------------|-------------------------------------------------------------------------------------|---------------------------------------------------------------------------------------------------------------------------------------------------------------------|
| Structure          | 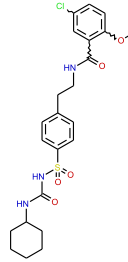 |  |                                                                                  |
| Actual Endpoint    | Non-Mutagen                                                                         | Mutagen                                                                             | Non-Mutagen                                                                                                                                                         |
| Predicted Endpoint | Non-Mutagen                                                                         | Mutagen                                                                             | Non-Mutagen                                                                                                                                                         |
| Distance           | 0.590                                                                               | 0.592                                                                               | 0.600                                                                                                                                                               |
| Reference          | PDR 1994                                                                            | Kazius et. al., J. Med. Chem. (2005) 48, 312-320                                    | US Environmental Protection Agency at <a href="http://www.epa.gov/NCCT/dsstox/sdf_isscan_external.html">http://www.epa.gov/NCCT/dsstox/sdf_isscan_external.html</a> |

## Model Applicability

Unknown features are fingerprint features in the query molecule, but not found or appearing too infrequently in the training set.

- All properties and OPS components are within expected ranges.

## Feature Contribution

### Top features for positive contribution

| Fingerprint | Bit/Smiles | Feature Structure                                                                                                                                           | Score | Mutagen in training set |
|-------------|------------|-------------------------------------------------------------------------------------------------------------------------------------------------------------|-------|-------------------------|
| SCFP_12     | 347281112  | 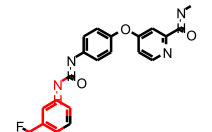<br><chem>[*]N(c1c:[cH]:[*]:[c]([*]):[c]([cH]:1)C([*])([*])[*])</chem> | 0.337 | 18 out of 22            |

|                                               |                   |                                                                                                                                                                         |              |                                |
|-----------------------------------------------|-------------------|-------------------------------------------------------------------------------------------------------------------------------------------------------------------------|--------------|--------------------------------|
| SCFP_12                                       | 1208843554        | 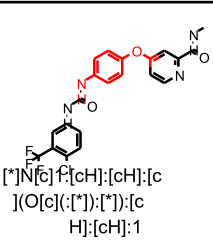<br>[*]N(c)F[cH]:[cH]:[c<br>)O(c):[*]:[*]:[c<br>H]:[cH]:1                             | 0.337        | 6 out of 7                     |
| SCFP_12                                       | -1943080297       | <br>[*]N(c)F[cH]:[cH]:[c<br>)O(c)2:[cH]:[cH]:[*<br>]:[c]([*]):[cH]:2:[<br>cH]:[cH]:1 | 0.304        | 5 out of 6                     |
| <b>Top Features for negative contribution</b> |                   |                                                                                                                                                                         |              |                                |
| <b>Fingerprint</b>                            | <b>Bit/Smiles</b> | <b>Feature Structure</b>                                                                                                                                                | <b>Score</b> | <b>Mutagen in training set</b> |
| SCFP_12                                       | 816802409         | <br>[*]NC(=O)N(c)1:[cH]:[<br>cH]:[c]([*]):[cH]:[c<br>H]:1                            | -1.82        | 0 out of 9                     |
| SCFP_12                                       | -1903175541       | <br>[*][c]([*]):[c]:[cH<br>]:[*]C(F)(F)F                                            | -1.51        | 3 out of 30                    |
| SCFP_12                                       | -300280774        | <br>[*]:[c]([*])C(F)(F)F                                                           | -1.51        | 3 out of 30                    |

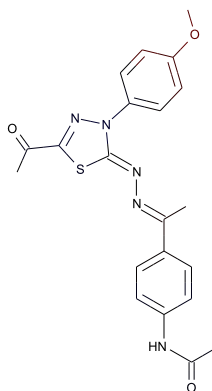

$C_{21}H_{21}N_5O_3S$

Molecular Weight: 423.48813

ALogP: 3.064

Rotatable Bonds: 6

Acceptors: 8

Donors: 1

## Model Prediction

**Prediction: Toxic**

Probability: 0.553

Enrichment: 1.05

Bayesian Score: 0.136

Mahalanobis Distance: 10.7

Mahalanobis Distance p-value: 0.00314

Prediction: Positive if the Bayesian score is above the estimated best cutoff value from minimizing the false positive and false negative rate.

Probability: The estimated probability that the sample is in the positive category. This assumes that the Bayesian score follows a normal distribution and is different from the prediction using a cutoff.

Enrichment: An estimate of enrichment, that is, the increased likelihood (versus random) of this sample being in the category.

Bayesian Score: The standard Laplacian-modified Bayesian score.

Mahalanobis Distance: The Mahalanobis distance (MD) is the distance to the center of the training data. The larger the MD, the less trustworthy the prediction.

Mahalanobis Distance p-value: The p-value gives the fraction of training data with an MD greater than or equal to the one for the given sample, assuming normally distributed data. The smaller the p-value, the less trustworthy the prediction. For highly non-normal X properties (e.g., fingerprints), the MD p-value is wildly inaccurate.

## Structural Similar Compounds

| Name               | Bunazosin .HCl (Free base form) | Acemetacin                     | Prazosin .HCl (Free base form) |
|--------------------|---------------------------------|--------------------------------|--------------------------------|
| Structure          |                                 |                                |                                |
| Actual Endpoint    | Toxic                           | Non-Toxic                      | Toxic                          |
| Predicted Endpoint | Toxic                           | Non-Toxic                      | Toxic                          |
| Distance           | 0.590                           | 0.612                          | 0.613                          |
| Reference          | Kiso to Rinsho 17:914-924; 1983 | Oyo Yakuri 22(6):777-786; 1981 | Oyo Yakuri 17:57-62; 1979      |

## Model Applicability

Unknown features are fingerprint features in the query molecule, but not found or appearing too infrequently in the training set.

1. All properties and OPS components are within expected ranges.

## Feature Contribution

### Top features for positive contribution

| Fingerprint | Bit/Smiles | Feature Structure                                                 | Score | Toxic in training set |
|-------------|------------|-------------------------------------------------------------------|-------|-----------------------|
| SCFP_6      | 1237755852 | <br><chem>CO[c]1:[cH]:[cH]:[cH]:[cH]:[cH]:[cH]:[cH]:[cH]:1</chem> | 0.453 | 8 out of 9            |



| SCFP_6                                        | 591469355   | 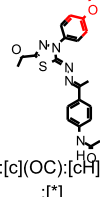<br>[*]:[cH]:[c](OC):[cH]<br>:[*]                       | 0.411  | 10 out of 12          |
|-----------------------------------------------|-------------|--------------------------------------------------------------------------------------------------------------------------------------------|--------|-----------------------|
| SCFP_6                                        | -331724199  | <br>[*]N=C(/C)[c](:[*])<br>:[*]                         | 0.271  | 1 out of 1            |
| <b>Top Features for negative contribution</b> |             |                                                                                                                                            |        |                       |
| Fingerprint                                   | Bit/Smiles  | Feature Structure                                                                                                                          | Score  | Toxic in training set |
| SCFP_6                                        | -1380909229 | <br>[*]N([*])[c]1:[cH]:[*]<br>:[c]([*]):[cH]:[cH]<br>:1 | -0.449 | 6 out of 19           |
| SCFP_6                                        | 2097618059  | <br>[*]:[cH]:[c](NC(=O)C)<br>:[cH]:[*]                 | -0.422 | 0 out of 1            |
| SCFP_6                                        | -704135030  | <br>[*]C(=[*])C1=N[*][*]S<br>1                        | -0.422 | 0 out of 1            |

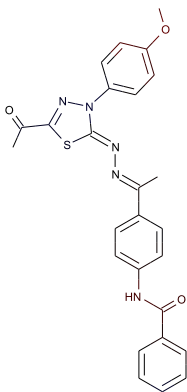

$C_{26}H_{23}N_5O_3S$

Molecular Weight: 485.55751

ALogP: 4.728

Rotatable Bonds: 7

Acceptors: 8

Donors: 1

## Model Prediction

**Prediction: Toxic**

Probability: 0.602

Enrichment: 1.15

Bayesian Score: 1.42

Mahalanobis Distance: 11.8

Mahalanobis Distance p-value: 7.25e-005

Prediction: Positive if the Bayesian score is above the estimated best cutoff value from minimizing the false positive and false negative rate.

Probability: The estimated probability that the sample is in the positive category. This assumes that the Bayesian score follows a normal distribution and is different from the prediction using a cutoff.

Enrichment: An estimate of enrichment, that is, the increased likelihood (versus random) of this sample being in the category.

Bayesian Score: The standard Laplacian-modified Bayesian score.

Mahalanobis Distance: The Mahalanobis distance (MD) is the distance to the center of the training data. The larger the MD, the less trustworthy the prediction.

Mahalanobis Distance p-value: The p-value gives the fraction of training data with an MD greater than or equal to the one for the given sample, assuming normally distributed data. The smaller the p-value, the less trustworthy the prediction. For highly non-normal X properties (e.g., fingerprints), the MD p-value is wildly inaccurate.

## Structural Similar Compounds

| Name               | Beclomethasone Dipropionate      | Acemetacin                     | Hydrocortisone-17-butyrate-21-propionate |
|--------------------|----------------------------------|--------------------------------|------------------------------------------|
| Structure          |                                  |                                |                                          |
| Actual Endpoint    | Toxic                            | Non-Toxic                      | Toxic                                    |
| Predicted Endpoint | Toxic                            | Non-Toxic                      | Toxic                                    |
| Distance           | 0.614                            | 0.616                          | 0.644                                    |
| Reference          | Oyo Yakuri 18(6):1021-1038; 1979 | Oyo Yakuri 22(6):777-786; 1981 | Oyo Yakuri 21:441-466; 1981              |

## Model Applicability

Unknown features are fingerprint features in the query molecule, but not found or appearing too infrequently in the training set.

- OPS PC17 out of range. Value: 3.4886. Training min, max, SD, explained variance: -2.7025, 2.8536, 1.067, 0.0167.

## Feature Contribution

### Top features for positive contribution

| Fingerprint | Bit/Smiles | Feature Structure                                       | Score | Toxic in training set |
|-------------|------------|---------------------------------------------------------|-------|-----------------------|
| SCFP_6      | 1237755852 | <br><chem>CO[c]1:[cH]:[cH]:[cH]:[cH]:[cH]:[cH]:1</chem> | 0.453 | 8 out of 9            |

|                                               |                   |                                                                                                                                    |              |                              |
|-----------------------------------------------|-------------------|------------------------------------------------------------------------------------------------------------------------------------|--------------|------------------------------|
| SCFP_6                                        | 282594097         | 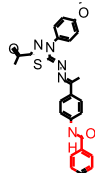<br>[*]NC(=O)[c]1:[cH]:[cH]:[*]:[cH]:[cH]:1     | 0.441        | 3 out of 3                   |
| SCFP_6                                        | 591469355         | <br>[*]:[cH]:[c](OC):[cH]:[*]                   | 0.411        | 10 out of 12                 |
| <b>Top Features for negative contribution</b> |                   |                                                                                                                                    |              |                              |
| <b>Fingerprint</b>                            | <b>Bit/Smiles</b> | <b>Feature Structure</b>                                                                                                           | <b>Score</b> | <b>Toxic in training set</b> |
| SCFP_6                                        | -1380909229       | <br>[*]N([*])[c]1:[cH]:[*]:[c]([*]):[cH]:[cH]:1 | -0.449       | 6 out of 19                  |
| SCFP_6                                        | -704135030        | <br>[*]C(=*)C1=N[*][*]S1                       | -0.422       | 0 out of 1                   |
| SCFP_6                                        | 1334669481        | <br>[*]N([*])[c](-[cH]:[*]):[cH]:[*]          | -0.355       | 10 out of 28                 |

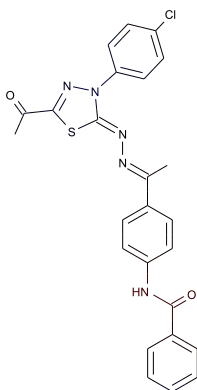

C<sub>25</sub>H<sub>20</sub>ClN<sub>5</sub>O<sub>2</sub>S

Molecular Weight: 489.97659

ALogP: 5.409

Rotatable Bonds: 6

Acceptors: 7

Donors: 1

## Model Prediction

Prediction: Non-Toxic

Probability: 0.533

Enrichment: 1.01

Bayesian Score: -0.387

Mahalanobis Distance: 11.4

Mahalanobis Distance p-value: 0.000251

Prediction: Positive if the Bayesian score is above the estimated best cutoff value from minimizing the false positive and false negative rate.

Probability: The estimated probability that the sample is in the positive category. This assumes that the Bayesian score follows a normal distribution and is different from the prediction using a cutoff.

Enrichment: An estimate of enrichment, that is, the increased likelihood (versus random) of this sample being in the category.

Bayesian Score: The standard Laplacian-modified Bayesian score.

Mahalanobis Distance: The Mahalanobis distance (MD) is the distance to the center of the training data. The larger the MD, the less trustworthy the prediction.

Mahalanobis Distance p-value: The p-value gives the fraction of training data with an MD greater than or equal to the one for the given sample, assuming normally distributed data. The smaller the p-value, the less trustworthy the prediction. For highly non-normal X properties (e.g., fingerprints), the MD p-value is wildly inaccurate.

## Structural Similar Compounds

| Name               | Acemetacin                     | Beclomethasone Dipropionate      | Estramustine Phosphate Disodium (Free acid form) |
|--------------------|--------------------------------|----------------------------------|--------------------------------------------------|
| Structure          |                                |                                  |                                                  |
| Actual Endpoint    | Non-Toxic                      | Toxic                            | Non-Toxic                                        |
| Predicted Endpoint | Non-Toxic                      | Toxic                            | Non-Toxic                                        |
| Distance           | 0.630                          | 0.662                            | 0.662                                            |
| Reference          | Oyo Yakuri 22(6):777-786; 1981 | Oyo Yakuri 18(6):1021-1038; 1979 | Oyo Yakuri 20(6):1219-1236; 1980                 |

## Model Applicability

Unknown features are fingerprint features in the query molecule, but not found or appearing too infrequently in the training set.

1. All properties and OPS components are within expected ranges.

## Feature Contribution

### Top features for positive contribution

| Fingerprint | Bit/Smiles | Feature Structure                                    | Score | Toxic in training set |
|-------------|------------|------------------------------------------------------|-------|-----------------------|
| SCFP_6      | 282594097  | <br><chem>[*]NC(=O)[c]1:[cH]:[cH]:[cH]:[cH]:1</chem> | 0.441 | 3 out of 3            |

|                                               |                   |                                                                                                                                            |              |                              |
|-----------------------------------------------|-------------------|--------------------------------------------------------------------------------------------------------------------------------------------|--------------|------------------------------|
| SCFP_6                                        | 1257084377        | 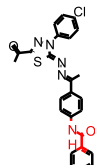<br>[*]NC(=O)[c](:[*]):[*]<br>]                         | 0.362        | 14 out of 18                 |
| SCFP_6                                        | -331724199        | <br>[*]N=C(/C)[c](:[*]):[*]<br>:[*]                     | 0.271        | 1 out of 1                   |
| <b>Top Features for negative contribution</b> |                   |                                                                                                                                            |              |                              |
| <b>Fingerprint</b>                            | <b>Bit/Smiles</b> | <b>Feature Structure</b>                                                                                                                   | <b>Score</b> | <b>Toxic in training set</b> |
| SCFP_6                                        | -1380909229       | <br>[*]N([*])[c]1:[c]([*]<br>):[c]([*]):[cH]:[cH]<br>:1 | -0.449       | 6 out of 19                  |
| SCFP_6                                        | -704135030        | <br>[*]C([*])C1=N[*][*]S<br>1                          | -0.422       | 0 out of 1                   |
| SCFP_6                                        | 1334669481        | <br>[*]N([*])[c](:[cH]:[*]<br>):[cH]:[*]              | -0.355       | 10 out of 28                 |

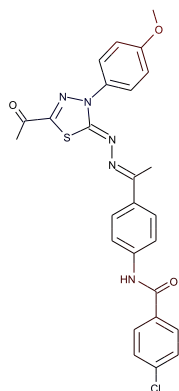

$C_{26}H_{22}ClN_5O_3S$

Molecular Weight: 520.00258

ALogP: 5.392

Rotatable Bonds: 7

Acceptors: 8

Donors: 1

## Model Prediction

**Prediction: Toxic**

Probability: 0.61

Enrichment: 1.16

Bayesian Score: 1.62

Mahalanobis Distance: 11

Mahalanobis Distance p-value: 0.00117

Prediction: Positive if the Bayesian score is above the estimated best cutoff value from minimizing the false positive and false negative rate.

Probability: The estimated probability that the sample is in the positive category. This assumes that the Bayesian score follows a normal distribution and is different from the prediction using a cutoff.

Enrichment: An estimate of enrichment, that is, the increased likelihood (versus random) of this sample being in the category.

Bayesian Score: The standard Laplacian-modified Bayesian score.

Mahalanobis Distance: The Mahalanobis distance (MD) is the distance to the center of the training data. The larger the MD, the less trustworthy the prediction.

Mahalanobis Distance p-value: The p-value gives the fraction of training data with an MD greater than or equal to the one for the given sample, assuming normally distributed data. The smaller the p-value, the less trustworthy the prediction. For highly non-normal X properties (e.g., fingerprints), the MD p-value is wildly inaccurate.

## Structural Similar Compounds

| Name               | Beclomethasone Dipropionate      | Acemetacin                     | Estramustine Phosphate Disodium (Free acid form) |
|--------------------|----------------------------------|--------------------------------|--------------------------------------------------|
| Structure          |                                  |                                |                                                  |
| Actual Endpoint    | Toxic                            | Non-Toxic                      | Non-Toxic                                        |
| Predicted Endpoint | Toxic                            | Non-Toxic                      | Non-Toxic                                        |
| Distance           | 0.637                            | 0.639                          | 0.657                                            |
| Reference          | Oyo Yakuri 18(6):1021-1038; 1979 | Oyo Yakuri 22(6):777-786; 1981 | Oyo Yakuri 20(6):1219-1236; 1980                 |

## Model Applicability

Unknown features are fingerprint features in the query molecule, but not found or appearing too infrequently in the training set.

1. All properties and OPS components are within expected ranges.

## Feature Contribution

### Top features for positive contribution

| Fingerprint | Bit/Smiles | Feature Structure                                                  | Score | Toxic in training set |
|-------------|------------|--------------------------------------------------------------------|-------|-----------------------|
| SCFP_6      | 1237755852 | <br><chem>CO[c]1:[cH]:[cH]s[*]:</chem><br><chem>[cH]:[cH]:1</chem> | 0.453 | 8 out of 9            |

|                                               |                   |                                                                                                                                          |              |                              |
|-----------------------------------------------|-------------------|------------------------------------------------------------------------------------------------------------------------------------------|--------------|------------------------------|
| SCFP_6                                        | 282594097         | 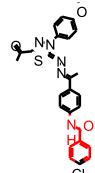<br>[*]NC(=O)[c]1:[cH]:[cH]:[*]:[cH]:[cH]:1           | 0.441        | 3 out of 3                   |
| SCFP_6                                        | 591469355         | <br>[*]:[cH]:[c](OC):[cH]:[*]                         | 0.411        | 10 out of 12                 |
| <b>Top Features for negative contribution</b> |                   |                                                                                                                                          |              |                              |
| <b>Fingerprint</b>                            | <b>Bit/Smiles</b> | <b>Feature Structure</b>                                                                                                                 | <b>Score</b> | <b>Toxic in training set</b> |
| SCFP_6                                        | -1380909229       | <br>[*]N([*])[c]1:[c]([*]):[*]:[c]([*]):[cH]:[cH]:1   | -0.449       | 6 out of 19                  |
| SCFP_6                                        | 1915307678        | <br>[*]C(=[*])[c]1:[c]([*]):[cH]:[c](Cl):[cH]:[cH]:1 | -0.422       | 0 out of 1                   |
| SCFP_6                                        | -704135030        | <br>[*]C(=[*])C1=N[*]S1                             | -0.422       | 0 out of 1                   |

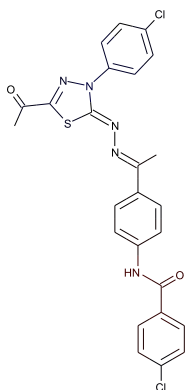

$C_{25}H_{19}Cl_2N_5O_2S$

Molecular Weight: 524.42166

ALogP: 6.073

Rotatable Bonds: 6

Acceptors: 7

Donors: 1

## Model Prediction

Prediction: Toxic

Probability: 0.543

Enrichment: 1.03

Bayesian Score: -0.127

Mahalanobis Distance: 10.7

Mahalanobis Distance p-value: 0.0025

Prediction: Positive if the Bayesian score is above the estimated best cutoff value from minimizing the false positive and false negative rate.

Probability: The estimated probability that the sample is in the positive category. This assumes that the Bayesian score follows a normal distribution and is different from the prediction using a cutoff.

Enrichment: An estimate of enrichment, that is, the increased likelihood (versus random) of this sample being in the category.

Bayesian Score: The standard Laplacian-modified Bayesian score.

Mahalanobis Distance: The Mahalanobis distance (MD) is the distance to the center of the training data. The larger the MD, the less trustworthy the prediction.

Mahalanobis Distance p-value: The p-value gives the fraction of training data with an MD greater than or equal to the one for the given sample, assuming normally distributed data. The smaller the p-value, the less trustworthy the prediction. For highly non-normal X properties (e.g., fingerprints), the MD p-value is wildly inaccurate.

## Structural Similar Compounds

| Name               | Brovanexine .HCl (Free base form)     | Estramustine Phosphate Disodium (Free acid form) | Acemetacin                     |
|--------------------|---------------------------------------|--------------------------------------------------|--------------------------------|
| Structure          |                                       |                                                  |                                |
| Actual Endpoint    | Toxic                                 | Non-Toxic                                        | Non-Toxic                      |
| Predicted Endpoint | Toxic                                 | Non-Toxic                                        | Non-Toxic                      |
| Distance           | 0.651                                 | 0.669                                            | 0.693                          |
| Reference          | Kiso to Rinsho 16(13):7179-7195; 1982 | Oyo Yakuri 20(6):1219-1236; 1980                 | Oyo Yakuri 22(6):777-786; 1981 |

## Model Applicability

Unknown features are fingerprint features in the query molecule, but not found or appearing too infrequently in the training set.

1. All properties and OPS components are within expected ranges.

## Feature Contribution

### Top features for positive contribution

| Fingerprint | Bit/Smiles | Feature Structure                                    | Score | Toxic in training set |
|-------------|------------|------------------------------------------------------|-------|-----------------------|
| SCFP_6      | 282594097  | <br><chem>[*]NC(=O)[c]1:[cH]:[cH]:[cH]:[cH]:1</chem> | 0.441 | 3 out of 3            |



|                                               |                   |                                                                                                                                                        |              |                              |
|-----------------------------------------------|-------------------|--------------------------------------------------------------------------------------------------------------------------------------------------------|--------------|------------------------------|
| SCFP_6                                        | 1257084377        | 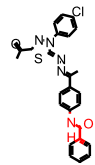<br>[*]NC(=O)[c]([*])S[*]                                           | 0.362        | 14 out of 18                 |
| SCFP_6                                        | -232641495        | <br>[*]:[cH]:[c](NC(=O))c<br>1:[cH]:[cH]:[*]:cH<br>:[cH]:1:[cH]:[*] | 0.271        | 1 out of 1                   |
| <b>Top Features for negative contribution</b> |                   |                                                                                                                                                        |              |                              |
| <b>Fingerprint</b>                            | <b>Bit/Smiles</b> | <b>Feature Structure</b>                                                                                                                               | <b>Score</b> | <b>Toxic in training set</b> |
| SCFP_6                                        | -1380909229       | <br>[*]N([*])[c]1:[c]([*])[*]<br>:[c]([*]):[cH]:[cH]<br>:1          | -0.449       | 6 out of 19                  |
| SCFP_6                                        | 1915307678        | <br>[*]C(=[*])[c]1:[c]([*])<br>cH]:[c](Cl):[cH]:[cH]<br>]:1        | -0.422       | 0 out of 1                   |
| SCFP_6                                        | -704135030        | <br>[*]C(=[*])C1=N[*][*]S<br>1                                    | -0.422       | 0 out of 1                   |

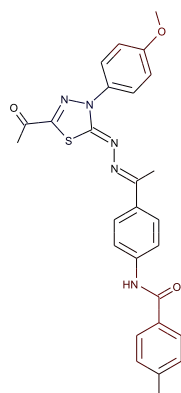

$C_{27}H_{25}N_5O_3S$

Molecular Weight: 499.58409

ALogP: 5.214

Rotatable Bonds: 7

Acceptors: 8

Donors: 1

## Model Prediction

**Prediction: Toxic**

Probability: 0.64

Enrichment: 1.22

Bayesian Score: 2.38

Mahalanobis Distance: 11.5

Mahalanobis Distance p-value: 0.000188

Prediction: Positive if the Bayesian score is above the estimated best cutoff value from minimizing the false positive and false negative rate.

Probability: The estimated probability that the sample is in the positive category. This assumes that the Bayesian score follows a normal distribution and is different from the prediction using a cutoff.

Enrichment: An estimate of enrichment, that is, the increased likelihood (versus random) of this sample being in the category.

Bayesian Score: The standard Laplacian-modified Bayesian score.

Mahalanobis Distance: The Mahalanobis distance (MD) is the distance to the center of the training data. The larger the MD, the less trustworthy the prediction.

Mahalanobis Distance p-value: The p-value gives the fraction of training data with an MD greater than or equal to the one for the given sample, assuming normally distributed data. The smaller the p-value, the less trustworthy the prediction. For highly non-normal X properties (e.g., fingerprints), the MD p-value is wildly inaccurate.

## Structural Similar Compounds

| Name               | Beclomethasone Dipropionate      | Acemetacin                     | Estramustine Phosphate Disodium (Free acid form) |
|--------------------|----------------------------------|--------------------------------|--------------------------------------------------|
| Structure          |                                  |                                |                                                  |
| Actual Endpoint    | Toxic                            | Non-Toxic                      | Non-Toxic                                        |
| Predicted Endpoint | Toxic                            | Non-Toxic                      | Non-Toxic                                        |
| Distance           | 0.631                            | 0.639                          | 0.654                                            |
| Reference          | Oyo Yakuri 18(6):1021-1038; 1979 | Oyo Yakuri 22(6):777-786; 1981 | Oyo Yakuri 20(6):1219-1236; 1980                 |

## Model Applicability

Unknown features are fingerprint features in the query molecule, but not found or appearing too infrequently in the training set.

1. All properties and OPS components are within expected ranges.

## Feature Contribution

### Top features for positive contribution

| Fingerprint | Bit/Smiles | Feature Structure                                 | Score | Toxic in training set |
|-------------|------------|---------------------------------------------------|-------|-----------------------|
| SCFP_6      | 1237755852 | <br><chem>CO[c]1:[cH]:[cH]:[*]:[cH]:[cH]:1</chem> | 0.453 | 8 out of 9            |

|                                               |                   |                                                                                                                                    |              |                              |
|-----------------------------------------------|-------------------|------------------------------------------------------------------------------------------------------------------------------------|--------------|------------------------------|
| SCFP_6                                        | 282594097         | 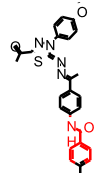<br>[*]NC(=O)[c]1:[cH]:[cH]:[*]:[cH]:[cH]:1     | 0.441        | 3 out of 3                   |
| SCFP_6                                        | 591469355         | <br>[*]:[cH]:[c](OC):[cH]:[*]                   | 0.411        | 10 out of 12                 |
| <b>Top Features for negative contribution</b> |                   |                                                                                                                                    |              |                              |
| <b>Fingerprint</b>                            | <b>Bit/Smiles</b> | <b>Feature Structure</b>                                                                                                           | <b>Score</b> | <b>Toxic in training set</b> |
| SCFP_6                                        | -1380909229       | <br>[*]N([*])[c]1:[cH]:[*]:[c]([*]):[cH]:[cH]:1 | -0.449       | 6 out of 19                  |
| SCFP_6                                        | -704135030        | <br>[*]C(=*)C1=N[*][*]S1                       | -0.422       | 0 out of 1                   |
| SCFP_6                                        | 1334669481        | <br>[*]N([*])[c](-:[cH]:[*]):[cH]:[*]         | -0.355       | 10 out of 28                 |

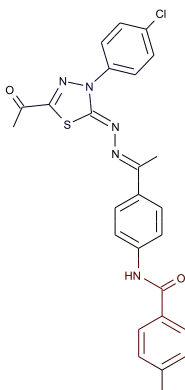

$C_{26}H_{22}ClN_5O_2S$

Molecular Weight: 504.00318

ALogP: 5.895

Rotatable Bonds: 6

Acceptors: 7

Donors: 1

## Model Prediction

**Prediction: Toxic**

Probability: 0.578

Enrichment: 1.1

Bayesian Score: 0.793

Mahalanobis Distance: 11.2

Mahalanobis Distance p-value: 0.000554

Prediction: Positive if the Bayesian score is above the estimated best cutoff value from minimizing the false positive and false negative rate.

Probability: The estimated probability that the sample is in the positive category. This assumes that the Bayesian score follows a normal distribution and is different from the prediction using a cutoff.

Enrichment: An estimate of enrichment, that is, the increased likelihood (versus random) of this sample being in the category.

Bayesian Score: The standard Laplacian-modified Bayesian score.

Mahalanobis Distance: The Mahalanobis distance (MD) is the distance to the center of the training data. The larger the MD, the less trustworthy the prediction.

Mahalanobis Distance p-value: The p-value gives the fraction of training data with an MD greater than or equal to the one for the given sample, assuming normally distributed data. The smaller the p-value, the less trustworthy the prediction. For highly non-normal X properties (e.g., fingerprints), the MD p-value is wildly inaccurate.

## Structural Similar Compounds

| Name               | Brovanexine .HCl (Free base form)     | Estramustine Phosphate Disodium (Free acid form) | Acemetacin                     |
|--------------------|---------------------------------------|--------------------------------------------------|--------------------------------|
| Structure          |                                       |                                                  |                                |
| Actual Endpoint    | Toxic                                 | Non-Toxic                                        | Non-Toxic                      |
| Predicted Endpoint | Toxic                                 | Non-Toxic                                        | Non-Toxic                      |
| Distance           | 0.656                                 | 0.659                                            | 0.665                          |
| Reference          | Kiso to Rinsho 16(13):7179-7195; 1982 | Oyo Yakuri 20(6):1219-1236; 1980                 | Oyo Yakuri 22(6):777-786; 1981 |

## Model Applicability

Unknown features are fingerprint features in the query molecule, but not found or appearing too infrequently in the training set.

- OPS PC2 out of range. Value: 6.7281. Training min, max, SD, explained variance: -4.772, 6.5229, 2.509, 0.0922.
- OPS PC14 out of range. Value: 4.4177. Training min, max, SD, explained variance: -3.5766, 3.955, 1.214, 0.0216.

## Feature Contribution

### Top features for positive contribution

| Fingerprint | Bit/Smiles | Feature Structure                                    | Score | Toxic in training set |
|-------------|------------|------------------------------------------------------|-------|-----------------------|
| SCFP_6      | 282594097  | <br><chem>[*]NC(=O)[c]1:[cH]:[cH]:[cH]:[cH]:1</chem> | 0.441 | 3 out of 3            |

| SCFP_6                                 | 1257084377  | 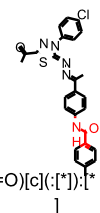<br><chem>[*]NC(=O)[c](:[*]):[*]</chem>                                                         | 0.362  | 14 out of 18          |
|----------------------------------------|-------------|------------------------------------------------------------------------------------------------------------------------------------------------------------------------------------|--------|-----------------------|
| SCFP_6                                 | 795925860   | <br><chem>[*][c]1:[cH]:[cH]:[c]</chem><br><chem>(C):[cH]:[cH]:1</chem>                          | 0.271  | 1 out of 1            |
| Top Features for negative contribution |             |                                                                                                                                                                                    |        |                       |
| Fingerprint                            | Bit/Smiles  | Feature Structure                                                                                                                                                                  | Score  | Toxic in training set |
| SCFP_6                                 | -1380909229 | <br><chem>[*]N([*])[c]1:[cH]:[*]</chem><br><chem>]:[c]([*]):[cH]:[cH]</chem><br><chem>:1</chem> | -0.449 | 6 out of 19           |
| SCFP_6                                 | -704135030  | <br><chem>[*]C(=[*])C1=N[*][*]S</chem><br><chem>1</chem>                                       | -0.422 | 0 out of 1            |
| SCFP_6                                 | 1334669481  | <br><chem>[*]N([*])[c](:[cH]:[*]</chem><br><chem>):[cH]:[*]</chem>                            | -0.355 | 10 out of 28          |

# Sorafenib

# TOPKAT\_Developmental\_Toxicity\_Potential

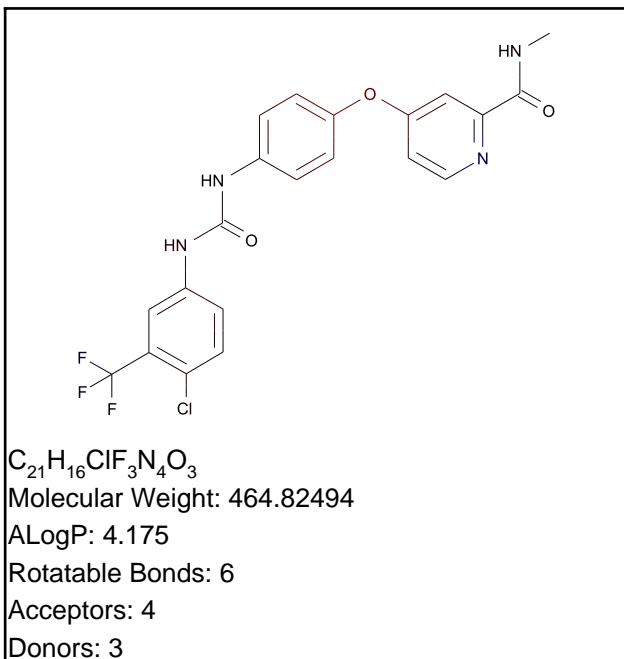

## Model Prediction

Prediction: Toxic

Probability: 0.592

Enrichment: 1.13

Bayesian Score: 1.15

Mahalanobis Distance: 12.6

Mahalanobis Distance p-value: 2.07e-006

Prediction: Positive if the Bayesian score is above the estimated best cutoff value from minimizing the false positive and false negative rate.

Probability: The estimated probability that the sample is in the positive category. This assumes that the Bayesian score follows a normal distribution and is different from the prediction using a cutoff.

Enrichment: An estimate of enrichment, that is, the increased likelihood (versus random) of this sample being in the category.

Bayesian Score: The standard Laplacian-modified Bayesian score.

Mahalanobis Distance: The Mahalanobis distance (MD) is the distance to the center of the training data. The larger the MD, the less trustworthy the prediction.

Mahalanobis Distance p-value: The p-value gives the fraction of training data with an MD greater than or equal to the one for the given sample, assuming normally distributed data. The smaller the p-value, the less trustworthy the prediction. For highly non-normal X properties (e.g., fingerprints), the MD p-value is wildly inaccurate.

## Structural Similar Compounds

| Name               | Chenodioli                                                                          | Amsacrine                                                                           | Ochratoxin a                                                                        |
|--------------------|-------------------------------------------------------------------------------------|-------------------------------------------------------------------------------------|-------------------------------------------------------------------------------------|
| Structure          | 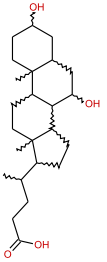 |  |  |
| Actual Endpoint    | Toxic                                                                               | Toxic                                                                               | Toxic                                                                               |
| Predicted Endpoint | Toxic                                                                               | Toxic                                                                               | Toxic                                                                               |
| Distance           | 0.631                                                                               | 0.637                                                                               | 0.644                                                                               |
| Reference          | Arch Int Pharm 246:149-158; 1980                                                    | Fundam Appl Toxicol 7(2):214-20; 1986                                               | Toxicol Appl Pharmacol 37(2):331-8; 1976                                            |

## Model Applicability

Unknown features are fingerprint features in the query molecule, but not found or appearing too infrequently in the training set.

1. All properties and OPS components are within expected ranges.

## Feature Contribution

### Top features for positive contribution

| Fingerprint | Bit/Smiles | Feature Structure                                                                                                                             | Score | Toxic in training set |
|-------------|------------|-----------------------------------------------------------------------------------------------------------------------------------------------|-------|-----------------------|
| SCFP_6      | 1559190850 | 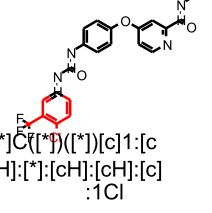<br>[*]C( [* ]) ( [* ]) [c]1:[c]H:[*]:[cH]:[cH]:[c]::1Cl | 0.441 | 3 out of 3            |

|                                               |                   |                                                                                                                                               |              |                              |
|-----------------------------------------------|-------------------|-----------------------------------------------------------------------------------------------------------------------------------------------|--------------|------------------------------|
| SCFP_6                                        | -488587948        | 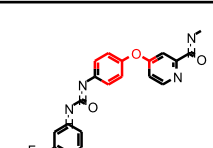<br>[*]:[c]([*])O[c]1:[cH]:[cH]:[*]:[cH]:[cH]:1             | 0.381        | 2 out of 2                   |
| SCFP_6                                        | -975241316        | <br>[*][c]1:[cH]:[cH]:[c](O[c](:[cH]:[*]):[cH]:[*]):[cH]:1 | 0.381        | 2 out of 2                   |
| <b>Top Features for negative contribution</b> |                   |                                                                                                                                               |              |                              |
| <b>Fingerprint</b>                            | <b>Bit/Smiles</b> | <b>Feature Structure</b>                                                                                                                      | <b>Score</b> | <b>Toxic in training set</b> |
| SCFP_6                                        | -1794974220       | <br>[*]C([*])([*])F                                        | -0.55        | 2 out of 8                   |
| SCFP_6                                        | -937094999        | <br>[*][c]1:[*]:[c]([*]):n:[cH]:[cH]:1                    | -0.358       | 3 out of 9                   |
| SCFP_6                                        | -496201075        | <br>[*]:[cH]:[cH]:n:[*]                                  | -0.289       | 8 out of 21                  |

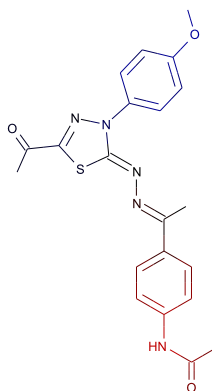

$C_{21}H_{21}N_5O_3S$

Molecular Weight: 423.48813

ALogP: 3.064

Rotatable Bonds: 6

Acceptors: 8

Donors: 1

## Model Prediction

Prediction: Non-Carcinogen

Probability: 0.225

Enrichment: 0.701

Bayesian Score: -2.52

Mahalanobis Distance: 11.7

Mahalanobis Distance p-value: 0.0223

Prediction: Positive if the Bayesian score is above the estimated best cutoff value from minimizing the false positive and false negative rate.

Probability: The estimated probability that the sample is in the positive category. This assumes that the Bayesian score follows a normal distribution and is different from the prediction using a cutoff.

Enrichment: An estimate of enrichment, that is, the increased likelihood (versus random) of this sample being in the category.

Bayesian Score: The standard Laplacian-modified Bayesian score.

Mahalanobis Distance: The Mahalanobis distance (MD) is the distance to the center of the training data. The larger the MD, the less trustworthy the prediction.

Mahalanobis Distance p-value: The p-value gives the fraction of training data with an MD greater than or equal to the one for the given sample, assuming normally distributed data. The smaller the p-value, the less trustworthy the prediction. For highly non-normal X properties (e.g., fingerprints), the MD p-value is wildly inaccurate.

## Structural Similar Compounds

| Name               | Nisoldipine                                                         | Isradipine                                                          | Moricizine                                                          |
|--------------------|---------------------------------------------------------------------|---------------------------------------------------------------------|---------------------------------------------------------------------|
| Structure          |                                                                     |                                                                     |                                                                     |
| Actual Endpoint    | Non-Carcinogen                                                      | Non-Carcinogen                                                      | Carcinogen                                                          |
| Predicted Endpoint | Non-Carcinogen                                                      | Non-Carcinogen                                                      | Carcinogen                                                          |
| Distance           | 0.605                                                               | 0.608                                                               | 0.624                                                               |
| Reference          | US FDA (Centre for Drug Eval.& Res./Off. Testing & Res.) Sept. 1997 | US FDA (Centre for Drug Eval.& Res./Off. Testing & Res.) Sept. 1997 | US FDA (Centre for Drug Eval.& Res./Off. Testing & Res.) Sept. 1997 |

## Model Applicability

Unknown features are fingerprint features in the query molecule, but not found or appearing too infrequently in the training set.

1. OPS PC4 out of range. Value: 4.791. Training min, max, SD, explained variance: -4.7116, 4.7287, 2.103, 0.0450.
2. Unknown ECFP\_2 feature: 128986386: [\*]N=C(/C)\[c](:[\*]):[\*]
3. Unknown ECFP\_2 feature: 562081661: [\*]C(=NN=[\*])[\*]
4. Unknown ECFP\_2 feature: -819426257: [\*]C(=NN=[\*])[\*]
5. Unknown ECFP\_2 feature: 189949281: [\*]N=C\1/S[\*]=[\*]N1[\*]
6. Unknown ECFP\_2 feature: -934225701: [\*]C(=[\*])C1=N[\*][\*]S1
7. Unknown ECFP\_2 feature: -1110911409: [\*]=C1[\*][\*]=NN1[c](:[\*]):[\*]

## Feature Contribution

### Top features for positive contribution

| Fingerprint | Bit/Smiles | Feature Structure | Score | Carcinogen in training set |
|-------------|------------|-------------------|-------|----------------------------|
|             |            |                   |       |                            |



|                                               |                   |                                                                                                                                          |              |                                   |
|-----------------------------------------------|-------------------|------------------------------------------------------------------------------------------------------------------------------------------|--------------|-----------------------------------|
| ECFP_6                                        | -1087070950       | 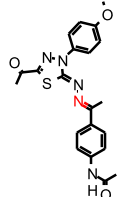<br>[*]N=[*]                                          | 0.724        | 10 out of 14                      |
| ECFP_6                                        | -847011520        | <br>[*]c1:[cH]:[cH]:[c]:<br>(NC(=O)C):[cH]:[cH]:<br>1 | 0.617        | 2 out of 2                        |
| ECFP_6                                        | 738938915         | <br>[*]C(=[*])N[c]1:[cH]:<br>[cH]:[*]:[cH]:[cH]:1     | 0.617        | 2 out of 2                        |
| <b>Top Features for negative contribution</b> |                   |                                                                                                                                          |              |                                   |
| <b>Fingerprint</b>                            | <b>Bit/Smiles</b> | <b>Feature Structure</b>                                                                                                                 | <b>Score</b> | <b>Carcinogen in training set</b> |
| ECFP_6                                        | -1271104377       | <br>CO[c]1:[cH]:[cH]:[*]:<br>[cH]:[cH]:1             | -0.805       | 0 out of 4                        |
| ECFP_6                                        | -175021654        | <br>[*]N([*])[c](-[cH]:[*]<br>):[cH]:[*]            | -0.805       | 0 out of 4                        |

|        |           |                                                                                                                                       |        |            |
|--------|-----------|---------------------------------------------------------------------------------------------------------------------------------------|--------|------------|
| ECFP_6 | 693720869 | 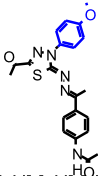<br>[*][c]1:[cH]:[cH]:[cH]:[c]<br>(OC):[cH]:[cH]:1 | -0.805 | 0 out of 4 |
|--------|-----------|---------------------------------------------------------------------------------------------------------------------------------------|--------|------------|

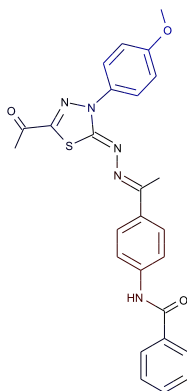

$C_{26}H_{23}N_5O_3S$

Molecular Weight: 485.55751

ALogP: 4.728

Rotatable Bonds: 7

Acceptors: 8

Donors: 1

## Model Prediction

Prediction: Non-Carcinogen

Probability: 0.206

Enrichment: 0.641

Bayesian Score: -5.52

Mahalanobis Distance: 12.8

Mahalanobis Distance p-value: 0.00101

Prediction: Positive if the Bayesian score is above the estimated best cutoff value from minimizing the false positive and false negative rate.

Probability: The estimated probability that the sample is in the positive category. This assumes that the Bayesian score follows a normal distribution and is different from the prediction using a cutoff.

Enrichment: An estimate of enrichment, that is, the increased likelihood (versus random) of this sample being in the category.

Bayesian Score: The standard Laplacian-modified Bayesian score.

Mahalanobis Distance: The Mahalanobis distance (MD) is the distance to the center of the training data. The larger the MD, the less trustworthy the prediction.

Mahalanobis Distance p-value: The p-value gives the fraction of training data with an MD greater than or equal to the one for the given sample, assuming normally distributed data. The smaller the p-value, the less trustworthy the prediction. For highly non-normal X properties (e.g., fingerprints), the MD p-value is wildly inaccurate.

## Structural Similar Compounds

| Name               | Fluticasone                                                         | Moricizine                                                          | Mycophenolate                                                       |
|--------------------|---------------------------------------------------------------------|---------------------------------------------------------------------|---------------------------------------------------------------------|
| Structure          |                                                                     |                                                                     |                                                                     |
| Actual Endpoint    | Non-Carcinogen                                                      | Carcinogen                                                          | Non-Carcinogen                                                      |
| Predicted Endpoint | Non-Carcinogen                                                      | Carcinogen                                                          | Non-Carcinogen                                                      |
| Distance           | 0.672                                                               | 0.696                                                               | 0.721                                                               |
| Reference          | US FDA (Centre for Drug Eval.& Res./Off. Testing & Res.) Sept. 1997 | US FDA (Centre for Drug Eval.& Res./Off. Testing & Res.) Sept. 1997 | US FDA (Centre for Drug Eval.& Res./Off. Testing & Res.) Sept. 1997 |

## Model Applicability

Unknown features are fingerprint features in the query molecule, but not found or appearing too infrequently in the training set.

1. All properties and OPS components are within expected ranges.
2. Unknown ECFP\_2 feature: 128986386: [\*]N=C(/C)\[c](:[\*]):[\*]
3. Unknown ECFP\_2 feature: 562081661: [\*]C(=NN=[\*])[\*]
4. Unknown ECFP\_2 feature: -819426257: [\*]C(=NN=[\*])[\*]
5. Unknown ECFP\_2 feature: 189949281: [\*]N=C\1/S[\*]=[\*]N1[\*]
6. Unknown ECFP\_2 feature: -934225701: [\*]C(=[\*])C1=N[\*][\*]S1
7. Unknown ECFP\_2 feature: -1110911409: [\*]=C1[\*][\*]=NN1[c](:[\*]):[\*]

## Feature Contribution

### Top features for positive contribution

| Fingerprint | Bit/Smiles | Feature Structure | Score | Carcinogen in training set |
|-------------|------------|-------------------|-------|----------------------------|
|             |            |                   |       |                            |

|                                               |                   |                                                                                                                                         |              |                                   |
|-----------------------------------------------|-------------------|-----------------------------------------------------------------------------------------------------------------------------------------|--------------|-----------------------------------|
| ECFP_6                                        | -1087070950       | 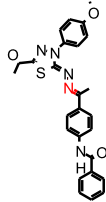<br>[*]N=[*]                                         | 0.724        | 10 out of 14                      |
| ECFP_6                                        | 738938915         | <br>[*]C=[*]N[c]1:[cH]:<br>[cH]:[*]:[cH]:[cH]:1      | 0.617        | 2 out of 2                        |
| ECFP_6                                        | -223149939        | <br>[*]NC(=O)[c]1:[cH]:[cH]:[*]:<br>[cH]:[cH]:[cH]:1 | 0.442        | 2 out of 3                        |
| <b>Top Features for negative contribution</b> |                   |                                                                                                                                         |              |                                   |
| <b>Fingerprint</b>                            | <b>Bit/Smiles</b> | <b>Feature Structure</b>                                                                                                                | <b>Score</b> | <b>Carcinogen in training set</b> |
| ECFP_6                                        | -1271104377       | <br>CO[c]1:[cH]:[cH]:[*]:<br>[cH]:[cH]:1            | -0.805       | 0 out of 4                        |
| ECFP_6                                        | -175021654        | <br>[*]N([*])[c](-:[cH]:[*]<br>):[cH]:[*]          | -0.805       | 0 out of 4                        |

|        |           |                                                                                                                                                                     |        |            |
|--------|-----------|---------------------------------------------------------------------------------------------------------------------------------------------------------------------|--------|------------|
| ECFP_6 | 693720869 | 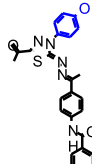 <p data-bbox="1255 282 1419 331">[*][c]1:[cH]:[cH]:[c]<br/>(OC):[cH]:[cH]:1</p> | -0.805 | 0 out of 4 |
|--------|-----------|---------------------------------------------------------------------------------------------------------------------------------------------------------------------|--------|------------|

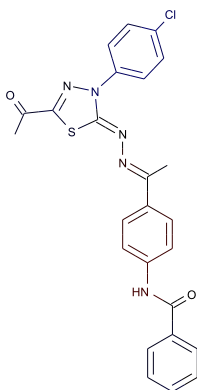

$C_{25}H_{20}ClN_5O_2S$

Molecular Weight: 489.97659

ALogP: 5.409

Rotatable Bonds: 6

Acceptors: 7

Donors: 1

## Model Prediction

Prediction: Non-Carcinogen

Probability: 0.21

Enrichment: 0.655

Bayesian Score: -4.37

Mahalanobis Distance: 14.6

Mahalanobis Distance p-value: 1.1e-006

Prediction: Positive if the Bayesian score is above the estimated best cutoff value from minimizing the false positive and false negative rate.

Probability: The estimated probability that the sample is in the positive category. This assumes that the Bayesian score follows a normal distribution and is different from the prediction using a cutoff.

Enrichment: An estimate of enrichment, that is, the increased likelihood (versus random) of this sample being in the category.

Bayesian Score: The standard Laplacian-modified Bayesian score.

Mahalanobis Distance: The Mahalanobis distance (MD) is the distance to the center of the training data. The larger the MD, the less trustworthy the prediction.

Mahalanobis Distance p-value: The p-value gives the fraction of training data with an MD greater than or equal to the one for the given sample, assuming normally distributed data. The smaller the p-value, the less trustworthy the prediction. For highly non-normal X properties (e.g., fingerprints), the MD p-value is wildly inaccurate.

## Structural Similar Compounds

| Name               | Fluticasone                                                         | Emetine                                                             | Moricizine                                                          |
|--------------------|---------------------------------------------------------------------|---------------------------------------------------------------------|---------------------------------------------------------------------|
| Structure          |                                                                     |                                                                     |                                                                     |
| Actual Endpoint    | Non-Carcinogen                                                      | Non-Carcinogen                                                      | Carcinogen                                                          |
| Predicted Endpoint | Non-Carcinogen                                                      | Non-Carcinogen                                                      | Carcinogen                                                          |
| Distance           | 0.632                                                               | 0.692                                                               | 0.698                                                               |
| Reference          | US FDA (Centre for Drug Eval.& Res./Off. Testing & Res.) Sept. 1997 | US FDA (Centre for Drug Eval.& Res./Off. Testing & Res.) Sept. 1997 | US FDA (Centre for Drug Eval.& Res./Off. Testing & Res.) Sept. 1997 |

## Model Applicability

Unknown features are fingerprint features in the query molecule, but not found or appearing too infrequently in the training set.

1. All properties and OPS components are within expected ranges.
2. Unknown ECFP\_2 feature: 128986386: [\*]N=C(/C)\[c](:[\*]):[\*]
3. Unknown ECFP\_2 feature: 562081661: [\*]C(=NN=[\*])[\*]
4. Unknown ECFP\_2 feature: -819426257: [\*]C(=NN=[\*])[\*]
5. Unknown ECFP\_2 feature: 189949281: [\*]N=C\1/S[\*]=[\*]N1[\*]
6. Unknown ECFP\_2 feature: -934225701: [\*]C(=[\*])C1=N[\*][\*]S1
7. Unknown ECFP\_2 feature: -1110911409: [\*]=C1[\*][\*]=NN1[c](:[\*]):[\*]

## Feature Contribution

### Top features for positive contribution

| Fingerprint | Bit/Smiles | Feature Structure | Score | Carcinogen in training set |
|-------------|------------|-------------------|-------|----------------------------|
|             |            |                   |       |                            |

|                                               |                   |                                                                                                                                  |              |                                   |
|-----------------------------------------------|-------------------|----------------------------------------------------------------------------------------------------------------------------------|--------------|-----------------------------------|
| ECFP_6                                        | -1087070950       | 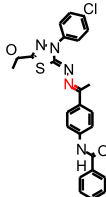<br>[*]N=[*]                                  | 0.724        | 10 out of 14                      |
| ECFP_6                                        | 738938915         | <br>[*]C(=[*])N[c]1:[cH]:[cH]:[*]:[cH]:[cH]:1 | 0.617        | 2 out of 2                        |
| ECFP_6                                        | -223149939        | <br>[*]NC(=O)[c]1:[cH]:[cH]:[*]:[cH]:[cH]:1   | 0.442        | 2 out of 3                        |
| <b>Top Features for negative contribution</b> |                   |                                                                                                                                  |              |                                   |
| <b>Fingerprint</b>                            | <b>Bit/Smiles</b> | <b>Feature Structure</b>                                                                                                         | <b>Score</b> | <b>Carcinogen in training set</b> |
| ECFP_6                                        | -175021654        | <br>[*]N([*])[c](:[cH]:[*]:[cH]:[*])         | -0.805       | 0 out of 4                        |
| ECFP_6                                        | 129482634         | <br>[*]C(=[*])C(=O)C                        | -0.657       | 0 out of 3                        |

|        |           |                                                                                                    |        |            |
|--------|-----------|----------------------------------------------------------------------------------------------------|--------|------------|
| ECFP_6 | 912478223 | 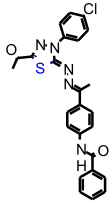 <p>[*]S[*]</p> | -0.638 | 1 out of 9 |
|--------|-----------|----------------------------------------------------------------------------------------------------|--------|------------|



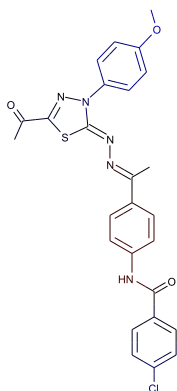

$C_{26}H_{22}ClN_5O_3S$

Molecular Weight: 520.00258

ALogP: 5.392

Rotatable Bonds: 7

Acceptors: 8

Donors: 1

## Model Prediction

Prediction: Non-Carcinogen

Probability: 0.205

Enrichment: 0.639

Bayesian Score: -6.56

Mahalanobis Distance: 14.1

Mahalanobis Distance p-value: 9.92e-006

Prediction: Positive if the Bayesian score is above the estimated best cutoff value from minimizing the false positive and false negative rate.

Probability: The estimated probability that the sample is in the positive category. This assumes that the Bayesian score follows a normal distribution and is different from the prediction using a cutoff.

Enrichment: An estimate of enrichment, that is, the increased likelihood (versus random) of this sample being in the category.

Bayesian Score: The standard Laplacian-modified Bayesian score.

Mahalanobis Distance: The Mahalanobis distance (MD) is the distance to the center of the training data. The larger the MD, the less trustworthy the prediction.

Mahalanobis Distance p-value: The p-value gives the fraction of training data with an MD greater than or equal to the one for the given sample, assuming normally distributed data. The smaller the p-value, the less trustworthy the prediction. For highly non-normal X properties (e.g., fingerprints), the MD p-value is wildly inaccurate.

## Structural Similar Compounds

| Name               | Fluticasone                                                         | Reserpine                                                           | Emetine                                                             |
|--------------------|---------------------------------------------------------------------|---------------------------------------------------------------------|---------------------------------------------------------------------|
| Structure          |                                                                     |                                                                     |                                                                     |
| Actual Endpoint    | Non-Carcinogen                                                      | Carcinogen                                                          | Non-Carcinogen                                                      |
| Predicted Endpoint | Non-Carcinogen                                                      | Carcinogen                                                          | Non-Carcinogen                                                      |
| Distance           | 0.697                                                               | 0.717                                                               | 0.730                                                               |
| Reference          | US FDA (Centre for Drug Eval.& Res./Off. Testing & Res.) Sept. 1997 | US FDA (Centre for Drug Eval.& Res./Off. Testing & Res.) Sept. 1997 | US FDA (Centre for Drug Eval.& Res./Off. Testing & Res.) Sept. 1997 |

## Model Applicability

Unknown features are fingerprint features in the query molecule, but not found or appearing too infrequently in the training set.

- OPS PC4 out of range. Value: 5.0431. Training min, max, SD, explained variance: -4.7116, 4.7287, 2.103, 0.0450.
- Unknown ECFP\_2 feature: 128986386: [\*]N=C(/C)[c](:[\*]):[\*]
- Unknown ECFP\_2 feature: 562081661: [\*]C(=NN=[\*])[\*]
- Unknown ECFP\_2 feature: -819426257: [\*]C(=NN=[\*])[\*]
- Unknown ECFP\_2 feature: 189949281: [\*]N=C\1/S[\*]=[\*]N1[\*]
- Unknown ECFP\_2 feature: -934225701: [\*]C(=[\*])C1=N[\*][\*]S1
- Unknown ECFP\_2 feature: -1110911409: [\*]=C1[\*][\*]=NN1[c](:[\*]):[\*]

## Feature Contribution

### Top features for positive contribution

| Fingerprint | Bit/Smiles | Feature Structure | Score | Carcinogen in training set |
|-------------|------------|-------------------|-------|----------------------------|
|             |            |                   |       |                            |

|                                               |                   |                                                                                                                                    |              |                                   |
|-----------------------------------------------|-------------------|------------------------------------------------------------------------------------------------------------------------------------|--------------|-----------------------------------|
| ECFP_6                                        | -1087070950       | 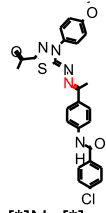<br>[*]N=[*]                                    | 0.724        | 10 out of 14                      |
| ECFP_6                                        | 738938915         | <br>[*]C=[*]N[c]1:[cH]:<br>[cH]:[*]:[cH]:[cH]:1 | 0.617        | 2 out of 2                        |
| ECFP_6                                        | -223149939        | <br>[*]NC(=O)[c]1:[cH]:[cH]:[*]:[cH]:[cH]:1     | 0.442        | 2 out of 3                        |
| <b>Top Features for negative contribution</b> |                   |                                                                                                                                    |              |                                   |
| <b>Fingerprint</b>                            | <b>Bit/Smiles</b> | <b>Feature Structure</b>                                                                                                           | <b>Score</b> | <b>Carcinogen in training set</b> |
| ECFP_6                                        | 693720869         | <br>[*][c]1:[cH]:[cH][c]<br>(OC):[cH]:[cH]:1   | -0.805       | 0 out of 4                        |
| ECFP_6                                        | -175021654        | <br>[*]N([*])[c](-:[cH]:[*]<br>):[cH]:[*]     | -0.805       | 0 out of 4                        |

|        |             |                                                                                                                                        |        |            |
|--------|-------------|----------------------------------------------------------------------------------------------------------------------------------------|--------|------------|
| ECFP_6 | -1271104377 | 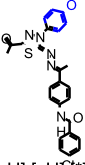 <p>CO[c]1:[cH]:[cH]:[cH]:[cH]:<br/>[cH]:[cH]:1</p> | -0.805 | 0 out of 4 |
|--------|-------------|----------------------------------------------------------------------------------------------------------------------------------------|--------|------------|

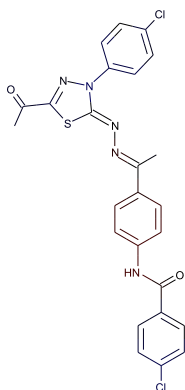

$C_{25}H_{19}Cl_2N_5O_2S$

Molecular Weight: 524.42166

ALogP: 6.073

Rotatable Bonds: 6

Acceptors: 7

Donors: 1

## Model Prediction

Prediction: Non-Carcinogen

Probability: 0.212

Enrichment: 0.662

Bayesian Score: -3.98

Mahalanobis Distance: 14.2

Mahalanobis Distance p-value: 6.17e-006

Prediction: Positive if the Bayesian score is above the estimated best cutoff value from minimizing the false positive and false negative rate.

Probability: The estimated probability that the sample is in the positive category. This assumes that the Bayesian score follows a normal distribution and is different from the prediction using a cutoff.

Enrichment: An estimate of enrichment, that is, the increased likelihood (versus random) of this sample being in the category.

Bayesian Score: The standard Laplacian-modified Bayesian score.

Mahalanobis Distance: The Mahalanobis distance (MD) is the distance to the center of the training data. The larger the MD, the less trustworthy the prediction.

Mahalanobis Distance p-value: The p-value gives the fraction of training data with an MD greater than or equal to the one for the given sample, assuming normally distributed data. The smaller the p-value, the less trustworthy the prediction. For highly non-normal X properties (e.g., fingerprints), the MD p-value is wildly inaccurate.

## Structural Similar Compounds

| Name               | Fluticasone                                                         | Emetine                                                             | Ketoconazole                                                        |
|--------------------|---------------------------------------------------------------------|---------------------------------------------------------------------|---------------------------------------------------------------------|
| Structure          |                                                                     |                                                                     |                                                                     |
| Actual Endpoint    | Non-Carcinogen                                                      | Non-Carcinogen                                                      | Non-Carcinogen                                                      |
| Predicted Endpoint | Non-Carcinogen                                                      | Non-Carcinogen                                                      | Non-Carcinogen                                                      |
| Distance           | 0.686                                                               | 0.714                                                               | 0.757                                                               |
| Reference          | US FDA (Centre for Drug Eval.& Res./Off. Testing & Res.) Sept. 1997 | US FDA (Centre for Drug Eval.& Res./Off. Testing & Res.) Sept. 1997 | US FDA (Centre for Drug Eval.& Res./Off. Testing & Res.) Sept. 1997 |

## Model Applicability

Unknown features are fingerprint features in the query molecule, but not found or appearing too infrequently in the training set.

1. All properties and OPS components are within expected ranges.
2. Unknown ECFP\_2 feature: 128986386: [\*]N=C(/C)\[c](:[\*]):[\*]
3. Unknown ECFP\_2 feature: 562081661: [\*]C(=NN=[\*])[\*]
4. Unknown ECFP\_2 feature: -819426257: [\*]C(=NN=[\*])[\*]
5. Unknown ECFP\_2 feature: 189949281: [\*]N=C\1/S[\*]=[\*]N1[\*]
6. Unknown ECFP\_2 feature: -934225701: [\*]C(=[\*])C1=N[\*][\*]S1
7. Unknown ECFP\_2 feature: -1110911409: [\*]=C1[\*][\*]=NN1[c](:[\*]):[\*]

## Feature Contribution

### Top features for positive contribution

| Fingerprint | Bit/Smiles | Feature Structure | Score | Carcinogen in training set |
|-------------|------------|-------------------|-------|----------------------------|
|             |            |                   |       |                            |

|                                               |                   |                                                                                                                                      |              |                                   |
|-----------------------------------------------|-------------------|--------------------------------------------------------------------------------------------------------------------------------------|--------------|-----------------------------------|
| ECFP_6                                        | -1087070950       | 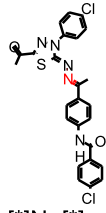<br>[*]N=[*]                                      | 0.724        | 10 out of 14                      |
| ECFP_6                                        | 738938915         | <br>[*]C(=[*])N[c]1:[cH]:<br>[cH]:[*]:[cH]:[cH]:1 | 0.617        | 2 out of 2                        |
| ECFP_6                                        | -223149939        | <br>[*]NC(=O)[c]1:[cH]:[c<br>H]:[*]:[cH]:[cH]:1   | 0.442        | 2 out of 3                        |
| <b>Top Features for negative contribution</b> |                   |                                                                                                                                      |              |                                   |
| <b>Fingerprint</b>                            | <b>Bit/Smiles</b> | <b>Feature Structure</b>                                                                                                             | <b>Score</b> | <b>Carcinogen in training set</b> |
| ECFP_6                                        | -175021654        | <br>[*]N([*])[c](:[cH]:[*]<br>):[cH]:[*]         | -0.805       | 0 out of 4                        |
| ECFP_6                                        | 129482634         | <br>[*]C(=[*])C(=O)C                            | -0.657       | 0 out of 3                        |

|        |           |                                                                                                  |        |            |
|--------|-----------|--------------------------------------------------------------------------------------------------|--------|------------|
| ECFP_6 | 912478223 | 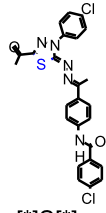<br>[*][S][*] | -0.638 | 1 out of 9 |
|--------|-----------|--------------------------------------------------------------------------------------------------|--------|------------|

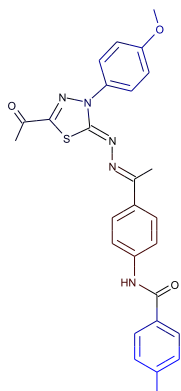

$C_{27}H_{25}N_5O_3S$

Molecular Weight: 499.58409

ALogP: 5.214

Rotatable Bonds: 7

Acceptors: 8

Donors: 1

## Model Prediction

Prediction: Non-Carcinogen

Probability: 0.224

Enrichment: 0.698

Bayesian Score: -10

Mahalanobis Distance: 12.6

Mahalanobis Distance p-value: 0.00212

Prediction: Positive if the Bayesian score is above the estimated best cutoff value from minimizing the false positive and false negative rate.

Probability: The estimated probability that the sample is in the positive category. This assumes that the Bayesian score follows a normal distribution and is different from the prediction using a cutoff.

Enrichment: An estimate of enrichment, that is, the increased likelihood (versus random) of this sample being in the category.

Bayesian Score: The standard Laplacian-modified Bayesian score.

Mahalanobis Distance: The Mahalanobis distance (MD) is the distance to the center of the training data. The larger the MD, the less trustworthy the prediction.

Mahalanobis Distance p-value: The p-value gives the fraction of training data with an MD greater than or equal to the one for the given sample, assuming normally distributed data. The smaller the p-value, the less trustworthy the prediction. For highly non-normal X properties (e.g., fingerprints), the MD p-value is wildly inaccurate.

## Structural Similar Compounds

| Name               | Fluticasone                                                         | Emetine                                                             | Bitolterol                                                          |
|--------------------|---------------------------------------------------------------------|---------------------------------------------------------------------|---------------------------------------------------------------------|
| Structure          |                                                                     |                                                                     |                                                                     |
| Actual Endpoint    | Non-Carcinogen                                                      | Non-Carcinogen                                                      | Non-Carcinogen                                                      |
| Predicted Endpoint | Non-Carcinogen                                                      | Non-Carcinogen                                                      | Non-Carcinogen                                                      |
| Distance           | 0.686                                                               | 0.720                                                               | 0.737                                                               |
| Reference          | US FDA (Centre for Drug Eval.& Res./Off. Testing & Res.) Sept. 1997 | US FDA (Centre for Drug Eval.& Res./Off. Testing & Res.) Sept. 1997 | US FDA (Centre for Drug Eval.& Res./Off. Testing & Res.) Sept. 1997 |

## Model Applicability

Unknown features are fingerprint features in the query molecule, but not found or appearing too infrequently in the training set.

1. OPS PC4 out of range. Value: 5.1129. Training min, max, SD, explained variance: -4.7116, 4.7287, 2.103, 0.0450.
2. Unknown ECFP\_2 feature: 128986386: [\*]N=C(/C)[c](:[\*]):[\*]
3. Unknown ECFP\_2 feature: 562081661: [\*]C(=NN=[\*])[\*]
4. Unknown ECFP\_2 feature: -819426257: [\*]C(=NN=[\*])[\*]
5. Unknown ECFP\_2 feature: 189949281: [\*]N=C\1/S[\*]=[\*]N1[\*]
6. Unknown ECFP\_2 feature: -934225701: [\*]C(=[\*])C1=N[\*][\*]S1
7. Unknown ECFP\_2 feature: -1110911409: [\*]=C1[\*][\*]=NN1[c](:[\*]):[\*]

## Feature Contribution

### Top features for positive contribution

| Fingerprint | Bit/Smiles | Feature Structure | Score | Carcinogen in training set |
|-------------|------------|-------------------|-------|----------------------------|
|             |            |                   |       |                            |

|                                               |                   |                                                                                                                                    |              |                                   |
|-----------------------------------------------|-------------------|------------------------------------------------------------------------------------------------------------------------------------|--------------|-----------------------------------|
| ECFP_6                                        | -1087070950       | 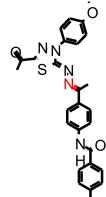<br>[*]N=[*]                                    | 0.724        | 10 out of 14                      |
| ECFP_6                                        | 738938915         | <br>[*]C=[*]N[c]1:[cH]:<br>[cH]:[*]:[cH]:[cH]:1 | 0.617        | 2 out of 2                        |
| ECFP_6                                        | -223149939        | <br>[*]NC(=O)[c]1:[cH]:[cH]:[*]:[cH]:[cH]:1     | 0.442        | 2 out of 3                        |
| <b>Top Features for negative contribution</b> |                   |                                                                                                                                    |              |                                   |
| <b>Fingerprint</b>                            | <b>Bit/Smiles</b> | <b>Feature Structure</b>                                                                                                           | <b>Score</b> | <b>Carcinogen in training set</b> |
| ECFP_6                                        | -179515162        | <br>[*]:[cH]:[c](C):[cH]:<br>[*]               | -1.41        | 0 out of 10                       |
| ECFP_6                                        | -210573707        | <br>[*][c]1:[*]:[cH]:[c](C):[cH]:[cH]:1       | -1.25        | 0 out of 8                        |



|        |            |                                                                                                                                                          |       |            |
|--------|------------|----------------------------------------------------------------------------------------------------------------------------------------------------------|-------|------------|
| ECFP_6 | -533780882 | 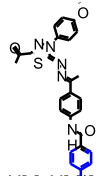 <p data-bbox="1255 284 1417 332">C[c]1:[cH]:[cH]:[*]:[cH]:[cH]:1</p> | -1.05 | 0 out of 6 |
|--------|------------|----------------------------------------------------------------------------------------------------------------------------------------------------------|-------|------------|

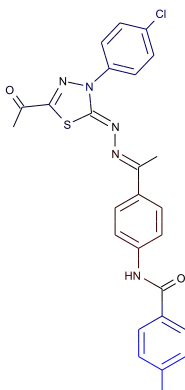

$C_{26}H_{22}ClN_5O_2S$

Molecular Weight: 504.00318

ALogP: 5.895

Rotatable Bonds: 6

Acceptors: 7

Donors: 1

## Model Prediction

Prediction: Non-Carcinogen

Probability: 0.216

Enrichment: 0.674

Bayesian Score: -9.2

Mahalanobis Distance: 14.2

Mahalanobis Distance p-value: 7.52e-006

Prediction: Positive if the Bayesian score is above the estimated best cutoff value from minimizing the false positive and false negative rate.

Probability: The estimated probability that the sample is in the positive category. This assumes that the Bayesian score follows a normal distribution and is different from the prediction using a cutoff.

Enrichment: An estimate of enrichment, that is, the increased likelihood (versus random) of this sample being in the category.

Bayesian Score: The standard Laplacian-modified Bayesian score.

Mahalanobis Distance: The Mahalanobis distance (MD) is the distance to the center of the training data. The larger the MD, the less trustworthy the prediction.

Mahalanobis Distance p-value: The p-value gives the fraction of training data with an MD greater than or equal to the one for the given sample, assuming normally distributed data. The smaller the p-value, the less trustworthy the prediction. For highly non-normal X properties (e.g., fingerprints), the MD p-value is wildly inaccurate.

## Structural Similar Compounds

| Name               | Fluticasone                                                         | Emetine                                                             | Bitolterol                                                          |
|--------------------|---------------------------------------------------------------------|---------------------------------------------------------------------|---------------------------------------------------------------------|
| Structure          |                                                                     |                                                                     |                                                                     |
| Actual Endpoint    | Non-Carcinogen                                                      | Non-Carcinogen                                                      | Non-Carcinogen                                                      |
| Predicted Endpoint | Non-Carcinogen                                                      | Non-Carcinogen                                                      | Non-Carcinogen                                                      |
| Distance           | 0.668                                                               | 0.699                                                               | 0.745                                                               |
| Reference          | US FDA (Centre for Drug Eval.& Res./Off. Testing & Res.) Sept. 1997 | US FDA (Centre for Drug Eval.& Res./Off. Testing & Res.) Sept. 1997 | US FDA (Centre for Drug Eval.& Res./Off. Testing & Res.) Sept. 1997 |

## Model Applicability

Unknown features are fingerprint features in the query molecule, but not found or appearing too infrequently in the training set.

1. All properties and OPS components are within expected ranges.
2. Unknown ECFP\_2 feature: 128986386: [\*]N=C(/C)\[c](:[\*]):[\*]
3. Unknown ECFP\_2 feature: 562081661: [\*]C(=NN=[\*])[\*]
4. Unknown ECFP\_2 feature: -819426257: [\*]C(=NN=[\*])[\*]
5. Unknown ECFP\_2 feature: 189949281: [\*]N=C\1/S[\*]=[\*]N1[\*]
6. Unknown ECFP\_2 feature: -934225701: [\*]C(=[\*])C1=N[\*][\*]S1
7. Unknown ECFP\_2 feature: -1110911409: [\*]=C1[\*][\*]=NN1[c](:[\*]):[\*]

## Feature Contribution

### Top features for positive contribution

| Fingerprint | Bit/Smiles | Feature Structure | Score | Carcinogen in training set |
|-------------|------------|-------------------|-------|----------------------------|
|             |            |                   |       |                            |

|                                               |                   |                                                                                                                                |              |                                   |
|-----------------------------------------------|-------------------|--------------------------------------------------------------------------------------------------------------------------------|--------------|-----------------------------------|
| ECFP_6                                        | -1087070950       | 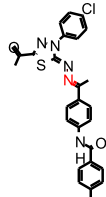<br>[*]N=[*]                                | 0.724        | 10 out of 14                      |
| ECFP_6                                        | 738938915         | <br>[*]C=[*]N[c]1:[cH]:[cH]:[*]:[cH]:[cH]:1 | 0.617        | 2 out of 2                        |
| ECFP_6                                        | -223149939        | <br>[*]NC(=O)[c]1:[cH]:[cH]:[*]:[cH]:[cH]:1 | 0.442        | 2 out of 3                        |
| <b>Top Features for negative contribution</b> |                   |                                                                                                                                |              |                                   |
| <b>Fingerprint</b>                            | <b>Bit/Smiles</b> | <b>Feature Structure</b>                                                                                                       | <b>Score</b> | <b>Carcinogen in training set</b> |
| ECFP_6                                        | -179515162        | <br>[*]:[cH]:[c](C):[cH]:[*]               | -1.41        | 0 out of 10                       |
| ECFP_6                                        | -210573707        | <br>[*][c]1:[*]:[cH]:[c](C):[cH]:[cH]:1   | -1.25        | 0 out of 8                        |

|        |             |                                                                                                                                                                        |       |            |
|--------|-------------|------------------------------------------------------------------------------------------------------------------------------------------------------------------------|-------|------------|
| ECFP_6 | -1926229349 | 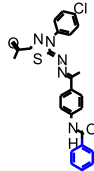 <p data-bbox="1255 284 1417 332">[*][c]1:[cH]:[cH]:[c]:[c]<br/>(C):[cH]:[cH]:1</p> | -1.05 | 0 out of 6 |
|--------|-------------|------------------------------------------------------------------------------------------------------------------------------------------------------------------------|-------|------------|

# Sorafenib

# TOPKAT\_Mouse\_Female\_FDA\_None\_vs\_Carcinogen

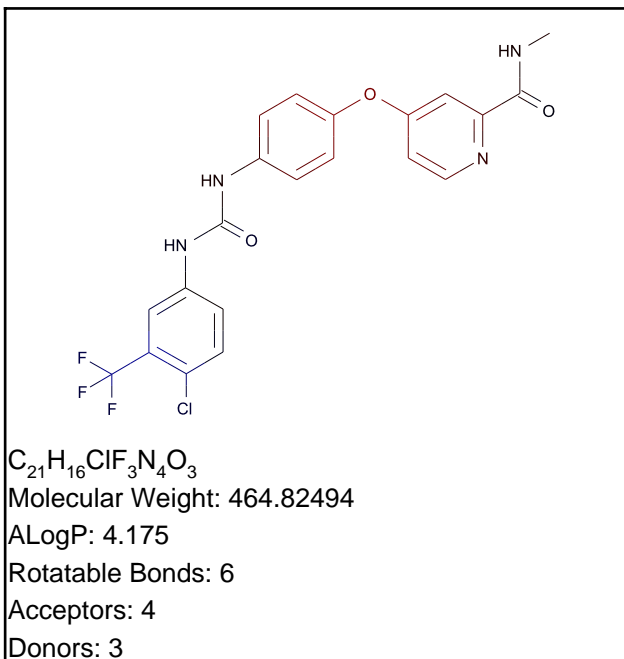

## Model Prediction

Prediction: **Carcinogen**

Probability: 0.257

Enrichment: 0.801

Bayesian Score: -0.321

Mahalanobis Distance: 14.9

Mahalanobis Distance p-value: 4.21e-007

Prediction: Positive if the Bayesian score is above the estimated best cutoff value from minimizing the false positive and false negative rate.

Probability: The estimated probability that the sample is in the positive category. This assumes that the Bayesian score follows a normal distribution and is different from the prediction using a cutoff.

Enrichment: An estimate of enrichment, that is, the increased likelihood (versus random) of this sample being in the category.

Bayesian Score: The standard Laplacian-modified Bayesian score.

Mahalanobis Distance: The Mahalanobis distance (MD) is the distance to the center of the training data. The larger the MD, the less trustworthy the prediction.

Mahalanobis Distance p-value: The p-value gives the fraction of training data with an MD greater than or equal to the one for the given sample, assuming normally distributed data. The smaller the p-value, the less trustworthy the prediction. For highly non-normal X properties (e.g., fingerprints), the MD p-value is wildly inaccurate.

## Structural Similar Compounds

| Name               | Glimepiride                                                                         | Glyburide                                                                           | Fluvastatin                                                                         |
|--------------------|-------------------------------------------------------------------------------------|-------------------------------------------------------------------------------------|-------------------------------------------------------------------------------------|
| Structure          | 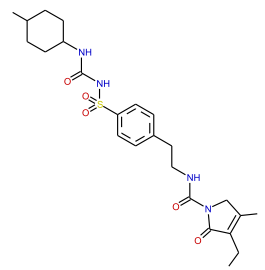 |  |  |
| Actual Endpoint    | Carcinogen                                                                          | Non-Carcinogen                                                                      | Non-Carcinogen                                                                      |
| Predicted Endpoint | Carcinogen                                                                          | Non-Carcinogen                                                                      | Non-Carcinogen                                                                      |
| Distance           | 0.605                                                                               | 0.615                                                                               | 0.625                                                                               |
| Reference          | US FDA (Centre for Drug Eval.& Res./Off. Testing & Res.) Sept. 1997                 | US FDA (Centre for Drug Eval.& Res./Off. Testing & Res.) Sept. 1997                 | US FDA (Centre for Drug Eval.& Res./Off. Testing & Res.) Sept. 1997                 |

## Model Applicability

Unknown features are fingerprint features in the query molecule, but not found or appearing too infrequently in the training set.

- OPS PC20 out of range. Value: -3.3309. Training min, max, SD, explained variance: -3.1862, 4.4571, 1.28, 0.0167.

## Feature Contribution

### Top features for positive contribution

| Fingerprint | Bit/Smiles | Feature Structure                                                                                                                               | Score | Carcinogen in training set |
|-------------|------------|-------------------------------------------------------------------------------------------------------------------------------------------------|-------|----------------------------|
| ECFP_6      | 738938915  | 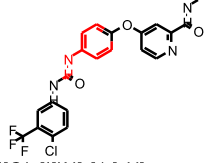<br><chem>[*]C(=[*])N[c]1:[cH]:[cH]:[*]:[cH]:[cH]:1</chem> | 0.617 | 2 out of 2                 |

| ECFP_6                                 | 1338334141  | 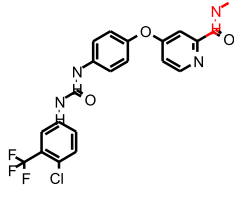<br><chem>[*]C(=[*])NC</chem>                                | 0.442  | 2 out of 3                 |
|----------------------------------------|-------------|-------------------------------------------------------------------------------------------------------------------------------------------------|--------|----------------------------|
| ECFP_6                                 | -834094296  | <br><chem>[*]:[cH]:[c](O[c]:[cH]:[*]):[cH]:[*]</chem>        | 0.424  | 1 out of 1                 |
| Top Features for negative contribution |             |                                                                                                                                                 |        |                            |
| Fingerprint                            | Bit/Smiles  | Feature Structure                                                                                                                               | Score  | Carcinogen in training set |
| ECFP_6                                 | 1335691903  | <br><chem>[*][c](:[*]):[c](Cl):[cH]:[*]</chem>               | -0.669 | 3 out of 22                |
| ECFP_6                                 | -1952889961 | <br><chem>[*]:[c](:[*])C(F)(F)F</chem>                      | -0.657 | 0 out of 3                 |
| ECFP_6                                 | 1336678434  | <br><chem>[*][c](:[*]):[c](:[cH]:[*])C([*])([*])[*]</chem> | -0.657 | 0 out of 3                 |

# Sorafenib

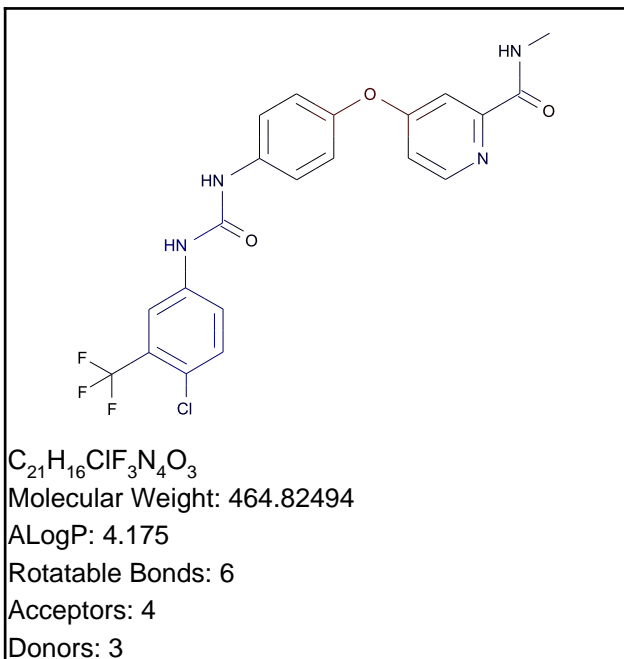

## Model Prediction

Prediction: Single-Carcinogen

Probability: 0.283

Enrichment: 0.691

Bayesian Score: -3.89

Mahalanobis Distance: 11.1

Mahalanobis Distance p-value: 0.00221

Prediction: Positive if the Bayesian score is above the estimated best cutoff value from minimizing the false positive and false negative rate.

Probability: The estimated probability that the sample is in the positive category. This assumes that the Bayesian score follows a normal distribution and is different from the prediction using a cutoff.

Enrichment: An estimate of enrichment, that is, the increased likelihood (versus random) of this sample being in the category.

Bayesian Score: The standard Laplacian-modified Bayesian score.

Mahalanobis Distance: The Mahalanobis distance (MD) is the distance to the center of the training data. The larger the MD, the less trustworthy the prediction.

Mahalanobis Distance p-value: The p-value gives the fraction of training data with an MD greater than or equal to the one for the given sample, assuming normally distributed data. The smaller the p-value, the less trustworthy the prediction. For highly non-normal X properties (e.g., fingerprints), the MD p-value is wildly inaccurate.

# TOPKAT\_Mouse\_Female\_FDA\_Single\_vs\_Multiple

## Structural Similar Compounds

| Name               | Glimepiride                                                                         | Labetalol                                                                           | Lansoprazole                                                                        |
|--------------------|-------------------------------------------------------------------------------------|-------------------------------------------------------------------------------------|-------------------------------------------------------------------------------------|
| Structure          | 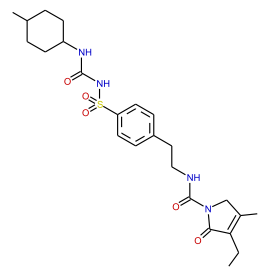 |  |  |
| Actual Endpoint    | Single-Carcinogen                                                                   | Single-Carcinogen                                                                   | Single-Carcinogen                                                                   |
| Predicted Endpoint | Single-Carcinogen                                                                   | Single-Carcinogen                                                                   | Single-Carcinogen                                                                   |
| Distance           | 0.599                                                                               | 0.808                                                                               | 0.820                                                                               |
| Reference          | US FDA (Centre for Drug Eval.& Res./Off. Testing & Res.) Sept. 1997                 | US FDA (Centre for Drug Eval.& Res./Off. Testing & Res.) Sept. 1997                 | US FDA (Centre for Drug Eval.& Res./Off. Testing & Res.) Sept. 1997                 |

## Model Applicability

Unknown features are fingerprint features in the query molecule, but not found or appearing too infrequently in the training set.

1. All properties and OPS components are within expected ranges.
2. Unknown ECFP\_2 feature: 1336678434: [\*][c](:[\*]):[c](C([\*])([\*])([\*])):c:[\*]
3. Unknown ECFP\_2 feature: -1952889961: [\*]:[c](:[\*])C(F)(F)F

## Feature Contribution

### Top features for positive contribution

| Fingerprint | Bit/Smiles | Feature Structure                                                                                                                | Score | Multiple-Carcinogen in training set |
|-------------|------------|----------------------------------------------------------------------------------------------------------------------------------|-------|-------------------------------------|
| ECFP_4      | -834094296 | 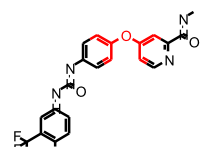<br>[*]:[cH]:[c](O[c](:[c]H):[*]):[c]H]:[*] | 0.351 | 1 out of 1                          |

|                                               |                   |                                                                                                                                                     |              |                                            |
|-----------------------------------------------|-------------------|-----------------------------------------------------------------------------------------------------------------------------------------------------|--------------|--------------------------------------------|
| ECFP_4                                        | 1407472008        | 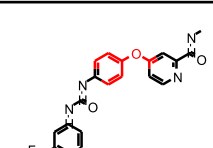<br><chem>[*]:[c]([*])O[c]1:[cH]:[cH]:[cH]:[cH]:1</chem>          | 0.351        | 1 out of 1                                 |
| ECFP_4                                        | 143734695         | <br><chem>[*][c]1[*]:[cH]:[cH]:[c](O[c](:[*]):[*]):[cH]:1</chem> | 0.351        | 1 out of 1                                 |
| <b>Top Features for negative contribution</b> |                   |                                                                                                                                                     |              |                                            |
| <b>Fingerprint</b>                            | <b>Bit/Smiles</b> | <b>Feature Structure</b>                                                                                                                            | <b>Score</b> | <b>Multiple-Carcinogen in training set</b> |
| ECFP_4                                        | 888054369         | <br><chem>[*]N[c]1:[cH]:[*]:[c]([*]):[cH]:[cH]:1</chem>          | -0.8         | 0 out of 3                                 |
| ECFP_4                                        | 1335691903        | <br><chem>[*][c](:[*]):[c](Cl):[cH]:[*]</chem>                 | -0.8         | 0 out of 3                                 |
| ECFP_4                                        | 1338334141        | <br><chem>[*]C(=[*])NC</chem>                                  | -0.597       | 0 out of 2                                 |





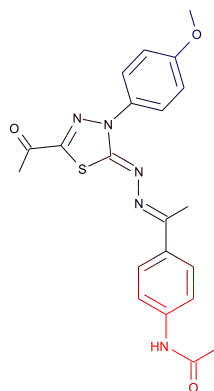

$C_{21}H_{21}N_5O_3S$

Molecular Weight: 423.48813

ALogP: 3.064

Rotatable Bonds: 6

Acceptors: 8

Donors: 1

## Model Prediction

**Prediction: Carcinogen**

Probability: 0.408

Enrichment: 1.39

Bayesian Score: 3.23

Mahalanobis Distance: 14.3

Mahalanobis Distance p-value: 1.62e-006

Prediction: Positive if the Bayesian score is above the estimated best cutoff value from minimizing the false positive and false negative rate.

Probability: The estimated probability that the sample is in the positive category. This assumes that the Bayesian score follows a normal distribution and is different from the prediction using a cutoff.

Enrichment: An estimate of enrichment, that is, the increased likelihood (versus random) of this sample being in the category.

Bayesian Score: The standard Laplacian-modified Bayesian score.

Mahalanobis Distance: The Mahalanobis distance (MD) is the distance to the center of the training data. The larger the MD, the less trustworthy the prediction.

Mahalanobis Distance p-value: The p-value gives the fraction of training data with an MD greater than or equal to the one for the given sample, assuming normally distributed data. The smaller the p-value, the less trustworthy the prediction. For highly non-normal X properties (e.g., fingerprints), the MD p-value is wildly inaccurate.

## Structural Similar Compounds

| Name               | Nisoldipine                                                         | Isradipine                                                          | Podofilox                                                           |
|--------------------|---------------------------------------------------------------------|---------------------------------------------------------------------|---------------------------------------------------------------------|
| Structure          |                                                                     |                                                                     |                                                                     |
| Actual Endpoint    | Non-Carcinogen                                                      | Non-Carcinogen                                                      | Non-Carcinogen                                                      |
| Predicted Endpoint | Non-Carcinogen                                                      | Non-Carcinogen                                                      | Non-Carcinogen                                                      |
| Distance           | 0.575                                                               | 0.587                                                               | 0.593                                                               |
| Reference          | US FDA (Centre for Drug Eval.& Res./Off. Testing & Res.) Sept. 1997 | US FDA (Centre for Drug Eval.& Res./Off. Testing & Res.) Sept. 1997 | US FDA (Centre for Drug Eval.& Res./Off. Testing & Res.) Sept. 1997 |

## Model Applicability

Unknown features are fingerprint features in the query molecule, but not found or appearing too infrequently in the training set.

1. All properties and OPS components are within expected ranges.

## Feature Contribution

### Top features for positive contribution

| Fingerprint | Bit/Smiles | Feature Structure        | Score | Carcinogen in training set |
|-------------|------------|--------------------------|-------|----------------------------|
| FCFP_6      | 1944671191 | <br>[*]:[c]:([*])NC(=O)C | 0.891 | 4 out of 4                 |

|                                               |                   |                                                                                                                                                                                       |              |                                   |
|-----------------------------------------------|-------------------|---------------------------------------------------------------------------------------------------------------------------------------------------------------------------------------|--------------|-----------------------------------|
| FCFP_6                                        | 1907952166        | 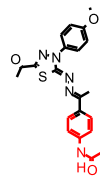<br><chem>CC(=O)N(c1:[cH]:[cH]:[cH]:[cH]:[cH]:[cH]:1):[cH]:[cH]:[cH]:1</chem>                      | 0.805        | 3 out of 3                        |
| FCFP_6                                        | -451043714        | <br><chem>[*][c]1:[cH]:[cH]:[cH]:[cH]:[cH]:[cH]:1</chem><br><chem>(NC(=O)C):[cH]:[cH]:1</chem>     | 0.676        | 2 out of 2                        |
| <b>Top Features for negative contribution</b> |                   |                                                                                                                                                                                       |              |                                   |
| <b>Fingerprint</b>                            | <b>Bit/Smiles</b> | <b>Feature Structure</b>                                                                                                                                                              | <b>Score</b> | <b>Carcinogen in training set</b> |
| FCFP_6                                        | -9847677          | <br><chem>[*][c]1:[cH]:[cH]:[cH]:[cH]:[cH]:1</chem><br><chem>(OC):[cH]:[cH]:1</chem>               | -0.719       | 0 out of 4                        |
| FCFP_6                                        | 356782498         | <br><chem>[*]N([*])[c]1:[cH]:[cH]:[cH]:[cH]:[cH]:1</chem><br><chem>H]:[c](OC):[cH]:[cH]:1</chem> | -0.582       | 0 out of 3                        |
| FCFP_6                                        | -1549192822       | <br><chem>[*]N=C(/C)(c):[c]:[c]:[c]:[c]:[c]:1</chem>                                             | -0.489       | 3 out of 21                       |

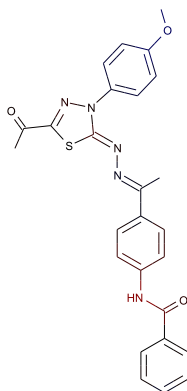

$C_{26}H_{23}N_5O_3S$

Molecular Weight: 485.55751

ALogP: 4.728

Rotatable Bonds: 7

Acceptors: 8

Donors: 1

## Model Prediction

**Prediction: Carcinogen**

Probability: 0.283

Enrichment: 0.963

Bayesian Score: -0.858

Mahalanobis Distance: 16.9

Mahalanobis Distance p-value: 9.73e-012

Prediction: Positive if the Bayesian score is above the estimated best cutoff value from minimizing the false positive and false negative rate.

Probability: The estimated probability that the sample is in the positive category. This assumes that the Bayesian score follows a normal distribution and is different from the prediction using a cutoff.

Enrichment: An estimate of enrichment, that is, the increased likelihood (versus random) of this sample being in the category.

Bayesian Score: The standard Laplacian-modified Bayesian score.

Mahalanobis Distance: The Mahalanobis distance (MD) is the distance to the center of the training data. The larger the MD, the less trustworthy the prediction.

Mahalanobis Distance p-value: The p-value gives the fraction of training data with an MD greater than or equal to the one for the given sample, assuming normally distributed data. The smaller the p-value, the less trustworthy the prediction. For highly non-normal X properties (e.g., fingerprints), the MD p-value is wildly inaccurate.

## Structural Similar Compounds

| Name               | Fluticasone                                                         | Moricizine                                                          | Mycophenolate                                                       |
|--------------------|---------------------------------------------------------------------|---------------------------------------------------------------------|---------------------------------------------------------------------|
| Structure          |                                                                     |                                                                     |                                                                     |
| Actual Endpoint    | Non-Carcinogen                                                      | Non-Carcinogen                                                      | Non-Carcinogen                                                      |
| Predicted Endpoint | Carcinogen                                                          | Non-Carcinogen                                                      | Non-Carcinogen                                                      |
| Distance           | 0.661                                                               | 0.684                                                               | 0.704                                                               |
| Reference          | US FDA (Centre for Drug Eval.& Res./Off. Testing & Res.) Sept. 1997 | US FDA (Centre for Drug Eval.& Res./Off. Testing & Res.) Sept. 1997 | US FDA (Centre for Drug Eval.& Res./Off. Testing & Res.) Sept. 1997 |

## Model Applicability

Unknown features are fingerprint features in the query molecule, but not found or appearing too infrequently in the training set.

1. All properties and OPS components are within expected ranges.

## Feature Contribution

### Top features for positive contribution

| Fingerprint | Bit/Smiles | Feature Structure                                    | Score | Carcinogen in training set |
|-------------|------------|------------------------------------------------------|-------|----------------------------|
| FCFP_6      | -581879738 | <br><chem>[*]NC(=O)[c]1:[cH]:[cH]:[cH]:[cH]:1</chem> | 0.77  | 4 out of 5                 |

|                                               |                   |                                                                                                                                                |              |                                   |
|-----------------------------------------------|-------------------|------------------------------------------------------------------------------------------------------------------------------------------------|--------------|-----------------------------------|
| FCFP_6                                        | -1838187238       | 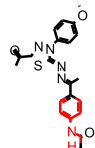<br>[*]C(=[*])N(c1:[cH]:[cH]:[cH]:[*]):[cH]:[*]:[cH]:[cH]:1 | 0.565        | 4 out of 7                        |
| FCFP_6                                        | 675799546         | <br>[*]=C1[*][*]=NN1(c(:[*]):[*])                           | 0.46         | 1 out of 1                        |
| <b>Top Features for negative contribution</b> |                   |                                                                                                                                                |              |                                   |
| <b>Fingerprint</b>                            | <b>Bit/Smiles</b> | <b>Feature Structure</b>                                                                                                                       | <b>Score</b> | <b>Carcinogen in training set</b> |
| FCFP_6                                        | -9847677          | <br>[*][c]1:[cH]:[cH]:[c] (OC):[cH]:[cH]:1                  | -0.719       | 0 out of 4                        |
| FCFP_6                                        | 356782498         | <br>[*]N([*])[c]1:[cH]:[cH]:[c]1H]:[c](OC):[cH]:[cH]:1     | -0.582       | 0 out of 3                        |
| FCFP_6                                        | -1549192822       | <br>[*]N=C(/C)[c]([*]):[*]                                | -0.489       | 3 out of 21                       |

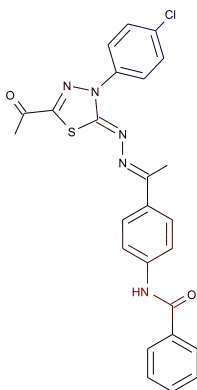

C<sub>25</sub>H<sub>20</sub>ClN<sub>5</sub>O<sub>2</sub>S

Molecular Weight: 489.97659

ALogP: 5.409

Rotatable Bonds: 6

Acceptors: 7

Donors: 1

## Model Prediction

**Prediction: Carcinogen**

Probability: 0.301

Enrichment: 1.02

Bayesian Score: -0.185

Mahalanobis Distance: 17.5

Mahalanobis Distance p-value: 4.16e-013

Prediction: Positive if the Bayesian score is above the estimated best cutoff value from minimizing the false positive and false negative rate.

Probability: The estimated probability that the sample is in the positive category. This assumes that the Bayesian score follows a normal distribution and is different from the prediction using a cutoff.

Enrichment: An estimate of enrichment, that is, the increased likelihood (versus random) of this sample being in the category.

Bayesian Score: The standard Laplacian-modified Bayesian score.

Mahalanobis Distance: The Mahalanobis distance (MD) is the distance to the center of the training data. The larger the MD, the less trustworthy the prediction.

Mahalanobis Distance p-value: The p-value gives the fraction of training data with an MD greater than or equal to the one for the given sample, assuming normally distributed data. The smaller the p-value, the less trustworthy the prediction. For highly non-normal X properties (e.g., fingerprints), the MD p-value is wildly inaccurate.

## Structural Similar Compounds

| Name               | Fluticasone                                                         | Emetine                                                             | Moricizine                                                          |
|--------------------|---------------------------------------------------------------------|---------------------------------------------------------------------|---------------------------------------------------------------------|
| Structure          |                                                                     |                                                                     |                                                                     |
| Actual Endpoint    | Non-Carcinogen                                                      | Non-Carcinogen                                                      | Non-Carcinogen                                                      |
| Predicted Endpoint | Carcinogen                                                          | Non-Carcinogen                                                      | Non-Carcinogen                                                      |
| Distance           | 0.615                                                               | 0.672                                                               | 0.684                                                               |
| Reference          | US FDA (Centre for Drug Eval.& Res./Off. Testing & Res.) Sept. 1997 | US FDA (Centre for Drug Eval.& Res./Off. Testing & Res.) Sept. 1997 | US FDA (Centre for Drug Eval.& Res./Off. Testing & Res.) Sept. 1997 |

## Model Applicability

Unknown features are fingerprint features in the query molecule, but not found or appearing too infrequently in the training set.

1. All properties and OPS components are within expected ranges.

## Feature Contribution

### Top features for positive contribution

| Fingerprint | Bit/Smiles | Feature Structure                                    | Score | Carcinogen in training set |
|-------------|------------|------------------------------------------------------|-------|----------------------------|
| FCFP_6      | -581879738 | <br><chem>[*]NC(=O)[c]1:[cH]:[cH]:[cH]:[cH]:1</chem> | 0.77  | 4 out of 5                 |

|                                               |                   |                                                                                                                                      |              |                                   |
|-----------------------------------------------|-------------------|--------------------------------------------------------------------------------------------------------------------------------------|--------------|-----------------------------------|
| FCFP_6                                        | -1838187238       | 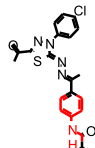<br>[*]C(=[*])N[c]1:[cH]:<br>[cH]:[*]:[cH]:[cH]:1 | 0.565        | 4 out of 7                        |
| FCFP_6                                        | 675799546         | <br>[*]=C1[*][*]=NN1[c](:<br>[*]):[*]             | 0.46         | 1 out of 1                        |
| <b>Top Features for negative contribution</b> |                   |                                                                                                                                      |              |                                   |
| <b>Fingerprint</b>                            | <b>Bit/Smiles</b> | <b>Feature Structure</b>                                                                                                             | <b>Score</b> | <b>Carcinogen in training set</b> |
| FCFP_6                                        | -1549192822       | <br>[*]N=C(/C)(c(:[*])<br>:[*]                    | -0.489       | 3 out of 21                       |
| FCFP_6                                        | 551850122         | <br>[*][c]1:[*]:[cH]:[c](<br>Cl):[cH]:[cH]:1     | -0.433       | 8 out of 49                       |
| FCFP_6                                        | 71476542          | <br>[*]:[c](:[*])Cl                             | -0.406       | 10 out of 59                      |

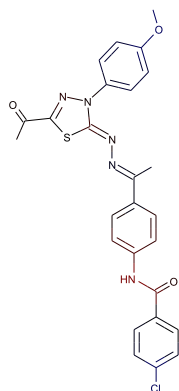

$C_{26}H_{22}ClN_5O_3S$

Molecular Weight: 520.00258

ALogP: 5.392

Rotatable Bonds: 7

Acceptors: 8

Donors: 1

## Model Prediction

**Prediction: Carcinogen**

Probability: 0.262

Enrichment: 0.892

Bayesian Score: -1.73

Mahalanobis Distance: 16.7

Mahalanobis Distance p-value: 3e-011

Prediction: Positive if the Bayesian score is above the estimated best cutoff value from minimizing the false positive and false negative rate.

Probability: The estimated probability that the sample is in the positive category. This assumes that the Bayesian score follows a normal distribution and is different from the prediction using a cutoff.

Enrichment: An estimate of enrichment, that is, the increased likelihood (versus random) of this sample being in the category.

Bayesian Score: The standard Laplacian-modified Bayesian score.

Mahalanobis Distance: The Mahalanobis distance (MD) is the distance to the center of the training data. The larger the MD, the less trustworthy the prediction.

Mahalanobis Distance p-value: The p-value gives the fraction of training data with an MD greater than or equal to the one for the given sample, assuming normally distributed data. The smaller the p-value, the less trustworthy the prediction. For highly non-normal X properties (e.g., fingerprints), the MD p-value is wildly inaccurate.

## Structural Similar Compounds

| Name               | Fluticasone                                                         | Emetine                                                             | Reserpine                                                           |
|--------------------|---------------------------------------------------------------------|---------------------------------------------------------------------|---------------------------------------------------------------------|
| Structure          |                                                                     |                                                                     |                                                                     |
| Actual Endpoint    | Non-Carcinogen                                                      | Non-Carcinogen                                                      | Carcinogen                                                          |
| Predicted Endpoint | Carcinogen                                                          | Non-Carcinogen                                                      | Carcinogen                                                          |
| Distance           | 0.684                                                               | 0.708                                                               | 0.709                                                               |
| Reference          | US FDA (Centre for Drug Eval.& Res./Off. Testing & Res.) Sept. 1997 | US FDA (Centre for Drug Eval.& Res./Off. Testing & Res.) Sept. 1997 | US FDA (Centre for Drug Eval.& Res./Off. Testing & Res.) Sept. 1997 |

## Model Applicability

Unknown features are fingerprint features in the query molecule, but not found or appearing too infrequently in the training set.

1. All properties and OPS components are within expected ranges.

## Feature Contribution

### Top features for positive contribution

| Fingerprint | Bit/Smiles | Feature Structure                                         | Score | Carcinogen in training set |
|-------------|------------|-----------------------------------------------------------|-------|----------------------------|
| FCFP_6      | -581879738 | <br><chem>[*]NC(=O)[c]1:[cH]:[cH]:[cH]:[cH]:[cH]:1</chem> | 0.77  | 4 out of 5                 |



|                                               |                   |                                                                                                                                             |              |                                   |
|-----------------------------------------------|-------------------|---------------------------------------------------------------------------------------------------------------------------------------------|--------------|-----------------------------------|
| FCFP_6                                        | -1838187238       | 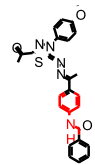<br>[*]C(=*)N(c)1:[cH]:<br>[cH]:[*]:[cH]:[cH]:1          | 0.565        | 4 out of 7                        |
| FCFP_6                                        | -319371573        | <br>[*]=C1[*][*]=NN1(c)<br>[cH]:[cH]:[*]:[cH]:[<br>cH]:2 | 0.46         | 1 out of 1                        |
| <b>Top Features for negative contribution</b> |                   |                                                                                                                                             |              |                                   |
| <b>Fingerprint</b>                            | <b>Bit/Smiles</b> | <b>Feature Structure</b>                                                                                                                    | <b>Score</b> | <b>Carcinogen in training set</b> |
| FCFP_6                                        | -9847677          | <br>[*][c]1:[cH]:[cH]:[c]<br>(OC):[cH]:[cH]:1            | -0.719       | 0 out of 4                        |
| FCFP_6                                        | 356782498         | <br>[*]N([*])[c]1:[cH]<br>H]:[c](OC):[cH]:[cH]<br>:1    | -0.582       | 0 out of 3                        |
| FCFP_6                                        | -1549192822       | <br>[*]N=C(/C)(c):[*]<br>:1                            | -0.489       | 3 out of 21                       |

18d

TOPKAT\_Mouse\_Male\_FDA\_None\_vs\_Carcinogen

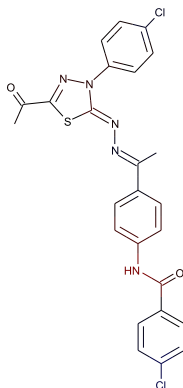C<sub>25</sub>H<sub>19</sub>Cl<sub>2</sub>N<sub>5</sub>O<sub>2</sub>S

Molecular Weight: 524.42166

ALogP: 6.073

Rotatable Bonds: 6

Acceptors: 7

Donors: 1

## Model Prediction

**Prediction: Carcinogen**

Probability: 0.325

Enrichment: 1.11

Bayesian Score: 0.689

Mahalanobis Distance: 17.6

Mahalanobis Distance p-value: 3.41e-013

Prediction: Positive if the Bayesian score is above the estimated best cutoff value from minimizing the false positive and false negative rate.

Probability: The estimated probability that the sample is in the positive category. This assumes that the Bayesian score follows a normal distribution and is different from the prediction using a cutoff.

Enrichment: An estimate of enrichment, that is, the increased likelihood (versus random) of this sample being in the category.

Bayesian Score: The standard Laplacian-modified Bayesian score.

Mahalanobis Distance: The Mahalanobis distance (MD) is the distance to the center of the training data. The larger the MD, the less trustworthy the prediction.

Mahalanobis Distance p-value: The p-value gives the fraction of training data with an MD greater than or equal to the one for the given sample, assuming normally distributed data. The smaller the p-value, the less trustworthy the prediction. For highly non-normal X properties (e.g., fingerprints), the MD p-value is wildly inaccurate.

## Structural Similar Compounds

| Name               | Fluticasone                                                         | Emetine                                                             | Ketoconazole                                                        |
|--------------------|---------------------------------------------------------------------|---------------------------------------------------------------------|---------------------------------------------------------------------|
| Structure          |                                                                     |                                                                     |                                                                     |
| Actual Endpoint    | Non-Carcinogen                                                      | Non-Carcinogen                                                      | Non-Carcinogen                                                      |
| Predicted Endpoint | Carcinogen                                                          | Non-Carcinogen                                                      | Non-Carcinogen                                                      |
| Distance           | 0.669                                                               | 0.695                                                               | 0.737                                                               |
| Reference          | US FDA (Centre for Drug Eval.& Res./Off. Testing & Res.) Sept. 1997 | US FDA (Centre for Drug Eval.& Res./Off. Testing & Res.) Sept. 1997 | US FDA (Centre for Drug Eval.& Res./Off. Testing & Res.) Sept. 1997 |

## Model Applicability

Unknown features are fingerprint features in the query molecule, but not found or appearing too infrequently in the training set.

1. All properties and OPS components are within expected ranges.

## Feature Contribution

### Top features for positive contribution

| Fingerprint | Bit/Smiles | Feature Structure                                    | Score | Carcinogen in training set |
|-------------|------------|------------------------------------------------------|-------|----------------------------|
| FCFP_6      | 581879738  | <br><chem>[*]NC(=O)[c]1:[cH]:[cH]:[cH]:[cH]:1</chem> | 0.77  | 4 out of 5                 |

|                                               |                   |                                                                                                                                  |              |                                   |
|-----------------------------------------------|-------------------|----------------------------------------------------------------------------------------------------------------------------------|--------------|-----------------------------------|
| FCFP_6                                        | -1838187238       | 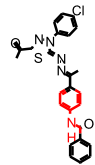<br>[*]C(=[*])N[c]1:[cH]:[cH]:[cH]:1          | 0.565        | 4 out of 7                        |
| FCFP_6                                        | 675799546         | <br>[*]=C1[*][*]=NN1[c](:[*]):[*]             | 0.46         | 1 out of 1                        |
| <b>Top Features for negative contribution</b> |                   |                                                                                                                                  |              |                                   |
| <b>Fingerprint</b>                            | <b>Bit/Smiles</b> | <b>Feature Structure</b>                                                                                                         | <b>Score</b> | <b>Carcinogen in training set</b> |
| FCFP_6                                        | -1549192822       | <br>[*]N=C(/C)([*])[c](:[*]):[*]              | -0.489       | 3 out of 21                       |
| FCFP_6                                        | 551850122         | <br>[*][c]1:[*]:[cH]:[c]([c]1Cl):[cH]:[cH]:1 | -0.433       | 8 out of 49                       |
| FCFP_6                                        | 71476542          | <br>[*]:[c](:[*])Cl                         | -0.406       | 10 out of 59                      |

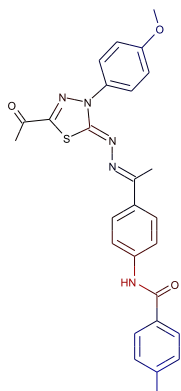

$C_{27}H_{25}N_5O_3S$

Molecular Weight: 499.58409

ALogP: 5.214

Rotatable Bonds: 7

Acceptors: 8

Donors: 1

## Model Prediction

Prediction: Non-Carcinogen

Probability: 0.24

Enrichment: 0.814

Bayesian Score: -2.78

Mahalanobis Distance: 17.2

Mahalanobis Distance p-value: 2.63e-012

Prediction: Positive if the Bayesian score is above the estimated best cutoff value from minimizing the false positive and false negative rate.

Probability: The estimated probability that the sample is in the positive category. This assumes that the Bayesian score follows a normal distribution and is different from the prediction using a cutoff.

Enrichment: An estimate of enrichment, that is, the increased likelihood (versus random) of this sample being in the category.

Bayesian Score: The standard Laplacian-modified Bayesian score.

Mahalanobis Distance: The Mahalanobis distance (MD) is the distance to the center of the training data. The larger the MD, the less trustworthy the prediction.

Mahalanobis Distance p-value: The p-value gives the fraction of training data with an MD greater than or equal to the one for the given sample, assuming normally distributed data. The smaller the p-value, the less trustworthy the prediction. For highly non-normal X properties (e.g., fingerprints), the MD p-value is wildly inaccurate.

## Structural Similar Compounds

| Name               | Fluticasone                                                         | Emetine                                                             | Bitolterol                                                          |
|--------------------|---------------------------------------------------------------------|---------------------------------------------------------------------|---------------------------------------------------------------------|
| Structure          |                                                                     |                                                                     |                                                                     |
| Actual Endpoint    | Non-Carcinogen                                                      | Non-Carcinogen                                                      | Non-Carcinogen                                                      |
| Predicted Endpoint | Carcinogen                                                          | Non-Carcinogen                                                      | Non-Carcinogen                                                      |
| Distance           | 0.676                                                               | 0.698                                                               | 0.724                                                               |
| Reference          | US FDA (Centre for Drug Eval.& Res./Off. Testing & Res.) Sept. 1997 | US FDA (Centre for Drug Eval.& Res./Off. Testing & Res.) Sept. 1997 | US FDA (Centre for Drug Eval.& Res./Off. Testing & Res.) Sept. 1997 |

## Model Applicability

Unknown features are fingerprint features in the query molecule, but not found or appearing too infrequently in the training set.

1. All properties and OPS components are within expected ranges.

## Feature Contribution

### Top features for positive contribution

| Fingerprint | Bit/Smiles | Feature Structure                                         | Score | Carcinogen in training set |
|-------------|------------|-----------------------------------------------------------|-------|----------------------------|
| FCFP_6      | -581879738 | <br><chem>[*]NC(=O)[c]1:[cH]:[cH]:[cH]:[cH]:[cH]:1</chem> | 0.77  | 4 out of 5                 |

|                                               |                   |                                                                                                                                     |              |                                   |
|-----------------------------------------------|-------------------|-------------------------------------------------------------------------------------------------------------------------------------|--------------|-----------------------------------|
| FCFP_6                                        | -1838187238       | 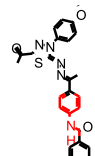<br>[*]C(=[*])N[c]1:[cH]:[cH]:[cH]:[cH]:1        | 0.565        | 4 out of 7                        |
| FCFP_6                                        | 1790572653        | <br>[*]NC(=O)[c]1:[cH]:[cH]:[cH]:[cH]:1          | 0.46         | 1 out of 1                        |
| <b>Top Features for negative contribution</b> |                   |                                                                                                                                     |              |                                   |
| <b>Fingerprint</b>                            | <b>Bit/Smiles</b> | <b>Feature Structure</b>                                                                                                            | <b>Score</b> | <b>Carcinogen in training set</b> |
| FCFP_6                                        | -1773728142       | <br>C[c]1:[cH]:[cH]:[*]:[cH]:[cH]:1              | -1.29        | 0 out of 10                       |
| FCFP_6                                        | 632767364         | <br>[*]C(=[*])[c]1:[cH]:[cH]:[c](C):[cH]:[cH]:1 | -1.04        | 0 out of 7                        |
| FCFP_6                                        | 2109043264        | <br>[*][c]1:[cH]:[cH]:[c](C):[cH]:[cH]:1       | -0.947       | 0 out of 6                        |

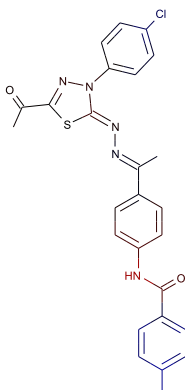

$C_{26}H_{22}ClN_5O_2S$

Molecular Weight: 504.00318

ALogP: 5.895

Rotatable Bonds: 6

Acceptors: 7

Donors: 1

## Model Prediction

Prediction: Non-Carcinogen

Probability: 0.259

Enrichment: 0.879

Bayesian Score: -1.9

Mahalanobis Distance: 18.6

Mahalanobis Distance p-value: 1.44e-015

Prediction: Positive if the Bayesian score is above the estimated best cutoff value from minimizing the false positive and false negative rate.

Probability: The estimated probability that the sample is in the positive category. This assumes that the Bayesian score follows a normal distribution and is different from the prediction using a cutoff.

Enrichment: An estimate of enrichment, that is, the increased likelihood (versus random) of this sample being in the category.

Bayesian Score: The standard Laplacian-modified Bayesian score.

Mahalanobis Distance: The Mahalanobis distance (MD) is the distance to the center of the training data. The larger the MD, the less trustworthy the prediction.

Mahalanobis Distance p-value: The p-value gives the fraction of training data with an MD greater than or equal to the one for the given sample, assuming normally distributed data. The smaller the p-value, the less trustworthy the prediction. For highly non-normal X properties (e.g., fingerprints), the MD p-value is wildly inaccurate.

## Structural Similar Compounds

| Name               | Fluticasone                                                         | Emetine                                                             | Bitolterol                                                          |
|--------------------|---------------------------------------------------------------------|---------------------------------------------------------------------|---------------------------------------------------------------------|
| Structure          |                                                                     |                                                                     |                                                                     |
| Actual Endpoint    | Non-Carcinogen                                                      | Non-Carcinogen                                                      | Non-Carcinogen                                                      |
| Predicted Endpoint | Carcinogen                                                          | Non-Carcinogen                                                      | Non-Carcinogen                                                      |
| Distance           | 0.651                                                               | 0.679                                                               | 0.735                                                               |
| Reference          | US FDA (Centre for Drug Eval.& Res./Off. Testing & Res.) Sept. 1997 | US FDA (Centre for Drug Eval.& Res./Off. Testing & Res.) Sept. 1997 | US FDA (Centre for Drug Eval.& Res./Off. Testing & Res.) Sept. 1997 |

## Model Applicability

Unknown features are fingerprint features in the query molecule, but not found or appearing too infrequently in the training set.

1. All properties and OPS components are within expected ranges.

## Feature Contribution

### Top features for positive contribution

| Fingerprint | Bit/Smiles | Feature Structure                                    | Score | Carcinogen in training set |
|-------------|------------|------------------------------------------------------|-------|----------------------------|
| FCFP_6      | -581879738 | <br><chem>[*]NC(=O)[c]1:[cH]:[cH]:[cH]:[cH]:1</chem> | 0.77  | 4 out of 5                 |

|                                               |                   |                                                                                                                                        |              |                                   |
|-----------------------------------------------|-------------------|----------------------------------------------------------------------------------------------------------------------------------------|--------------|-----------------------------------|
| FCFP_6                                        | -1838187238       | 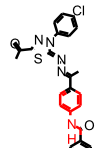<br>[*]C(=[*])N[c]1:[cH]:[cH]:[*]:[cH]:[cH]:[cH]:1  | 0.565        | 4 out of 7                        |
| FCFP_6                                        | 1790572653        | <br>[*]NC(=O)[c]1:[cH]:[cH]:[c]1:[cH]:[cH]:[cH]:1   | 0.46         | 1 out of 1                        |
| <b>Top Features for negative contribution</b> |                   |                                                                                                                                        |              |                                   |
| <b>Fingerprint</b>                            | <b>Bit/Smiles</b> | <b>Feature Structure</b>                                                                                                               | <b>Score</b> | <b>Carcinogen in training set</b> |
| FCFP_6                                        | -1773728142       | <br>C[c]1:[cH]:[cH]:[*]:[cH]:[cH]:1                 | -1.29        | 0 out of 10                       |
| FCFP_6                                        | 632767364         | <br>[*]C(=[*])[c]1:[cH]:[cH]:[c]1:[cH]:[cH]:[cH]:1 | -1.04        | 0 out of 7                        |
| FCFP_6                                        | 2109043264        | <br>[*][c]1:[cH]:[cH]:[c]1:[cH]:[cH]:[cH]:1       | -0.947       | 0 out of 6                        |

# Sorafenib

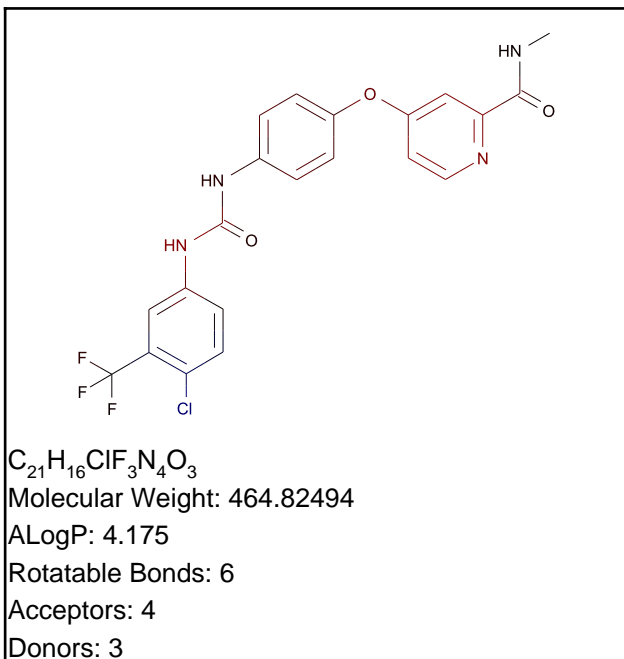

## Model Prediction

Prediction: **Carcinogen**

Probability: 0.444

Enrichment: 1.51

Bayesian Score: 4.21

Mahalanobis Distance: 20.3

Mahalanobis Distance p-value: 1.28e-019

Prediction: Positive if the Bayesian score is above the estimated best cutoff value from minimizing the false positive and false negative rate.

Probability: The estimated probability that the sample is in the positive category. This assumes that the Bayesian score follows a normal distribution and is different from the prediction using a cutoff.

Enrichment: An estimate of enrichment, that is, the increased likelihood (versus random) of this sample being in the category.

Bayesian Score: The standard Laplacian-modified Bayesian score.

Mahalanobis Distance: The Mahalanobis distance (MD) is the distance to the center of the training data. The larger the MD, the less trustworthy the prediction.

Mahalanobis Distance p-value: The p-value gives the fraction of training data with an MD greater than or equal to the one for the given sample, assuming normally distributed data. The smaller the p-value, the less trustworthy the prediction. For highly non-normal X properties (e.g., fingerprints), the MD p-value is wildly inaccurate.

# TOPKAT\_Mouse\_Male\_FDA\_None\_vs\_Carcinogen

## Structural Similar Compounds

| Name               | Glyburide                                                                           | Glimepiride                                                                         | Fluvastatin                                                                         |
|--------------------|-------------------------------------------------------------------------------------|-------------------------------------------------------------------------------------|-------------------------------------------------------------------------------------|
| Structure          | 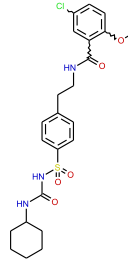 |  |  |
| Actual Endpoint    | Non-Carcinogen                                                                      | Carcinogen                                                                          | Non-Carcinogen                                                                      |
| Predicted Endpoint | Non-Carcinogen                                                                      | Carcinogen                                                                          | Non-Carcinogen                                                                      |
| Distance           | 0.594                                                                               | 0.599                                                                               | 0.603                                                                               |
| Reference          | US FDA (Centre for Drug Eval.& Res./Off. Testing & Res.) Sept. 1997                 | US FDA (Centre for Drug Eval.& Res./Off. Testing & Res.) Sept. 1997                 | US FDA (Centre for Drug Eval.& Res./Off. Testing & Res.) Sept. 1997                 |

## Model Applicability

Unknown features are fingerprint features in the query molecule, but not found or appearing too infrequently in the training set.

1. All properties and OPS components are within expected ranges.

## Feature Contribution

### Top features for positive contribution

| Fingerprint | Bit/Smiles | Feature Structure                                                                                        | Score | Carcinogen in training set |
|-------------|------------|----------------------------------------------------------------------------------------------------------|-------|----------------------------|
| FCFP_6      | 71953198   | 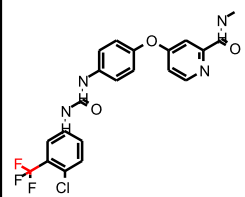<br>[*]C([*])([*])F | 0.612 | 12 out of 23               |



|                                               |                   |                                                                                                                                               |              |                                   |
|-----------------------------------------------|-------------------|-----------------------------------------------------------------------------------------------------------------------------------------------|--------------|-----------------------------------|
| FCFP_6                                        | -1838187238       | 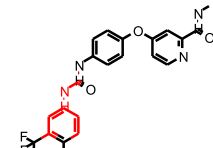<br>[*]C(=[*])N[c]1:[cH]:<br>[cH]:[*]:[cH]:[cH]:1          | 0.565        | 4 out of 7                        |
| FCFP_6                                        | 140656626         | <br>[*]O[c]1:[cH]:[cH]:n:<br>[c](:[cH]:1)C(=[*])[<br>*]    | 0.46         | 1 out of 1                        |
| <b>Top Features for negative contribution</b> |                   |                                                                                                                                               |              |                                   |
| <b>Fingerprint</b>                            | <b>Bit/Smiles</b> | <b>Feature Structure</b>                                                                                                                      | <b>Score</b> | <b>Carcinogen in training set</b> |
| FCFP_6                                        | 2104062943        | <br>[*]C(=[*])([*])[c]1:[c<br>H]:[*]:[cH]:[cH]:[c]<br>:1Cl | -1.01        | 1 out of 17                       |
| FCFP_6                                        | 551850122         | <br>[*][c]1:[*]:[cH]:[c]<br>(Cl):[cH]:[cH]:1              | -0.433       | 8 out of 49                       |
| FCFP_6                                        | 71476542          | <br>[*]:[c](:[*])Cl                                      | -0.406       | 10 out of 59                      |

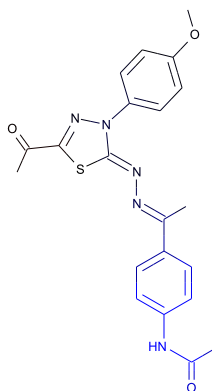

$C_{21}H_{21}N_5O_3S$

Molecular Weight: 423.48813

ALogP: 3.064

Rotatable Bonds: 6

Acceptors: 8

Donors: 1

## Model Prediction

Prediction: Single-Carcinogen

Probability: 0.148

Enrichment: 0.493

Bayesian Score: -13.7

Mahalanobis Distance: 11.3

Mahalanobis Distance p-value: 0.00212

Prediction: Positive if the Bayesian score is above the estimated best cutoff value from minimizing the false positive and false negative rate.

Probability: The estimated probability that the sample is in the positive category. This assumes that the Bayesian score follows a normal distribution and is different from the prediction using a cutoff.

Enrichment: An estimate of enrichment, that is, the increased likelihood (versus random) of this sample being in the category.

Bayesian Score: The standard Laplacian-modified Bayesian score.

Mahalanobis Distance: The Mahalanobis distance (MD) is the distance to the center of the training data. The larger the MD, the less trustworthy the prediction.

Mahalanobis Distance p-value: The p-value gives the fraction of training data with an MD greater than or equal to the one for the given sample, assuming normally distributed data. The smaller the p-value, the less trustworthy the prediction. For highly non-normal X properties (e.g., fingerprints), the MD p-value is wildly inaccurate.

## Structural Similar Compounds

| Name               | Bicalutamide                                                        | Griseofulvin                                                        | Lovastatin                                                          |
|--------------------|---------------------------------------------------------------------|---------------------------------------------------------------------|---------------------------------------------------------------------|
| Structure          |                                                                     |                                                                     |                                                                     |
| Actual Endpoint    | Single-Carcinogen                                                   | Single-Carcinogen                                                   | Multiple-Carcinogen                                                 |
| Predicted Endpoint | Single-Carcinogen                                                   | Single-Carcinogen                                                   | Multiple-Carcinogen                                                 |
| Distance           | 0.807                                                               | 0.828                                                               | 0.832                                                               |
| Reference          | US FDA (Centre for Drug Eval.& Res./Off. Testing & Res.) Sept. 1997 | US FDA (Centre for Drug Eval.& Res./Off. Testing & Res.) Sept. 1997 | US FDA (Centre for Drug Eval.& Res./Off. Testing & Res.) Sept. 1997 |

## Model Applicability

Unknown features are fingerprint features in the query molecule, but not found or appearing too infrequently in the training set.

- OPS PC15 out of range. Value: -2.6395. Training min, max, SD, explained variance: -2.4461, 3.3002, 1.005, 0.0188.

## Feature Contribution

### Top features for positive contribution

| Fingerprint | Bit/Smiles | Feature Structure                     | Score | Multiple-Carcinogen in training set |
|-------------|------------|---------------------------------------|-------|-------------------------------------|
| FCFP_12     | 565998553  | <br><chem>*[C]=[*]C1=N[*][*]S1</chem> | 0.194 | 6 out of 14                         |

|                                               |                   |                                                                                                                                           |              |                                            |
|-----------------------------------------------|-------------------|-------------------------------------------------------------------------------------------------------------------------------------------|--------------|--------------------------------------------|
| FCFP_12                                       | 565968762         | 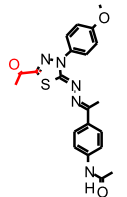<br><chem>[*]C(=[*])C(=O)C</chem>                      | 0.168        | 3 out of 7                                 |
| FCFP_12                                       | -1977641857       | <br><chem>[*]:[cH]:[c](OC):[cH]<br/>:[*]</chem>        | 0.105        | 2 out of 5                                 |
| <b>Top Features for negative contribution</b> |                   |                                                                                                                                           |              |                                            |
| <b>Fingerprint</b>                            | <b>Bit/Smiles</b> | <b>Feature Structure</b>                                                                                                                  | <b>Score</b> | <b>Multiple-Carcinogen in training set</b> |
| FCFP_12                                       | 1294255210        | <br><chem>[*]C(=[*])N(c(:[*])):[*]</chem>              | -1.63        | 0 out of 12                                |
| FCFP_12                                       | 1175665944        | <br><chem>[*]:[cH]:[c](NC(=O)C)<br/>:[cH]:[*]</chem> | -1.22        | 0 out of 7                                 |
| FCFP_12                                       | 590925877         | <br><chem>[*]N(c(:[cH]):[*]):[cH]:[*]</chem>         | -0.998       | 1 out of 13                                |



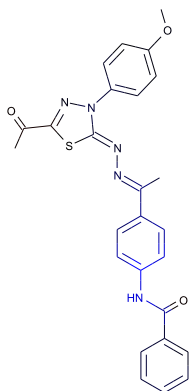

$C_{26}H_{23}N_5O_3S$

Molecular Weight: 485.55751

ALogP: 4.728

Rotatable Bonds: 7

Acceptors: 8

Donors: 1

## Model Prediction

Prediction: Single-Carcinogen

Probability: 0.146

Enrichment: 0.484

Bayesian Score: -9.06

Mahalanobis Distance: 12.6

Mahalanobis Distance p-value: 0.000192

Prediction: Positive if the Bayesian score is above the estimated best cutoff value from minimizing the false positive and false negative rate.

Probability: The estimated probability that the sample is in the positive category. This assumes that the Bayesian score follows a normal distribution and is different from the prediction using a cutoff.

Enrichment: An estimate of enrichment, that is, the increased likelihood (versus random) of this sample being in the category.

Bayesian Score: The standard Laplacian-modified Bayesian score.

Mahalanobis Distance: The Mahalanobis distance (MD) is the distance to the center of the training data. The larger the MD, the less trustworthy the prediction.

Mahalanobis Distance p-value: The p-value gives the fraction of training data with an MD greater than or equal to the one for the given sample, assuming normally distributed data. The smaller the p-value, the less trustworthy the prediction. For highly non-normal X properties (e.g., fingerprints), the MD p-value is wildly inaccurate.

## Structural Similar Compounds

| Name               | Reserpine                                                           | Simvastatin                                                         | Lovastatin                                                          |
|--------------------|---------------------------------------------------------------------|---------------------------------------------------------------------|---------------------------------------------------------------------|
| Structure          |                                                                     |                                                                     |                                                                     |
| Actual Endpoint    | Multiple-Carcinogen                                                 | Multiple-Carcinogen                                                 | Multiple-Carcinogen                                                 |
| Predicted Endpoint | Multiple-Carcinogen                                                 | Multiple-Carcinogen                                                 | Multiple-Carcinogen                                                 |
| Distance           | 0.799                                                               | 0.826                                                               | 0.834                                                               |
| Reference          | US FDA (Centre for Drug Eval.& Res./Off. Testing & Res.) Sept. 1997 | US FDA (Centre for Drug Eval.& Res./Off. Testing & Res.) Sept. 1997 | US FDA (Centre for Drug Eval.& Res./Off. Testing & Res.) Sept. 1997 |

## Model Applicability

Unknown features are fingerprint features in the query molecule, but not found or appearing too infrequently in the training set.

1. All properties and OPS components are within expected ranges.

## Feature Contribution

### Top features for positive contribution

| Fingerprint | Bit/Smiles | Feature Structure                                           | Score | Multiple-Carcinogen in training set |
|-------------|------------|-------------------------------------------------------------|-------|-------------------------------------|
| FCFP_12     | -581879738 | <br><chem>[*]NC(=O)[c]1:[cH]:[cH]1:[cH]1:[cH]:[cH]:1</chem> | 0.239 | 2 out of 4                          |

|                                               |                   |                                                                                                                                      |              |                                            |
|-----------------------------------------------|-------------------|--------------------------------------------------------------------------------------------------------------------------------------|--------------|--------------------------------------------|
| FCFP_12                                       | 565998553         | 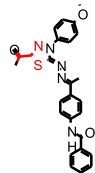<br>[*]C(=*)C1=N[*]S1                             | 0.194        | 6 out of 14                                |
| FCFP_12                                       | 565968762         | <br>[*]C(=*)C(=O)C                                | 0.168        | 3 out of 7                                 |
| <b>Top Features for negative contribution</b> |                   |                                                                                                                                      |              |                                            |
| <b>Fingerprint</b>                            | <b>Bit/Smiles</b> | <b>Feature Structure</b>                                                                                                             | <b>Score</b> | <b>Multiple-Carcinogen in training set</b> |
| FCFP_12                                       | 1294255210        | <br>[*]C(=*)N[c](:[*]):<br>[*]                    | -1.63        | 0 out of 12                                |
| FCFP_12                                       | 590925877         | <br>[*]N[c](:[cH]:[*]):[cH]:[*]                 | -0.998       | 1 out of 13                                |
| FCFP_12                                       | 1838187238        | <br>[*]C(=*)N[c]1:[cH]:<br>[cH]:[*]:[cH]:[cH]:1 | -0.859       | 0 out of 4                                 |



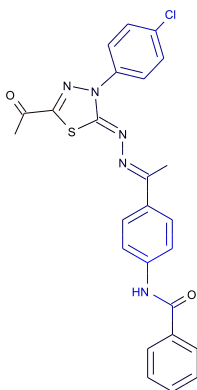

$C_{25}H_{20}ClN_5O_2S$

Molecular Weight: 489.97659

ALogP: 5.409

Rotatable Bonds: 6

Acceptors: 7

Donors: 1

## Model Prediction

Prediction: Single-Carcinogen

Probability: 0.156

Enrichment: 0.519

Bayesian Score: -12.8

Mahalanobis Distance: 13.1

Mahalanobis Distance p-value: 7.77e-005

Prediction: Positive if the Bayesian score is above the estimated best cutoff value from minimizing the false positive and false negative rate.

Probability: The estimated probability that the sample is in the positive category. This assumes that the Bayesian score follows a normal distribution and is different from the prediction using a cutoff.

Enrichment: An estimate of enrichment, that is, the increased likelihood (versus random) of this sample being in the category.

Bayesian Score: The standard Laplacian-modified Bayesian score.

Mahalanobis Distance: The Mahalanobis distance (MD) is the distance to the center of the training data. The larger the MD, the less trustworthy the prediction.

Mahalanobis Distance p-value: The p-value gives the fraction of training data with an MD greater than or equal to the one for the given sample, assuming normally distributed data. The smaller the p-value, the less trustworthy the prediction. For highly non-normal X properties (e.g., fingerprints), the MD p-value is wildly inaccurate.

## Structural Similar Compounds

| Name               | Simvastatin                                                         | Lovastatin                                                          | Bicalutamide                                                        |
|--------------------|---------------------------------------------------------------------|---------------------------------------------------------------------|---------------------------------------------------------------------|
| Structure          |                                                                     |                                                                     |                                                                     |
| Actual Endpoint    | Multiple-Carcinogen                                                 | Multiple-Carcinogen                                                 | Single-Carcinogen                                                   |
| Predicted Endpoint | Multiple-Carcinogen                                                 | Multiple-Carcinogen                                                 | Single-Carcinogen                                                   |
| Distance           | 0.754                                                               | 0.773                                                               | 0.807                                                               |
| Reference          | US FDA (Centre for Drug Eval.& Res./Off. Testing & Res.) Sept. 1997 | US FDA (Centre for Drug Eval.& Res./Off. Testing & Res.) Sept. 1997 | US FDA (Centre for Drug Eval.& Res./Off. Testing & Res.) Sept. 1997 |

## Model Applicability

Unknown features are fingerprint features in the query molecule, but not found or appearing too infrequently in the training set.

- OPS PC2 out of range. Value: 4.6015. Training min, max, SD, explained variance: -5.2888, 4.2744, 2.566, 0.1229.

## Feature Contribution

### Top features for positive contribution

| Fingerprint | Bit/Smiles | Feature Structure                                    | Score | Multiple-Carcinogen in training set |
|-------------|------------|------------------------------------------------------|-------|-------------------------------------|
| FCFP_12     | -581879738 | <br><chem>[*]NC(=O)[c]1:[cH]:[cH]:[cH]:[cH]:1</chem> | 0.239 | 2 out of 4                          |



|                                               |                   |                                                                                                                                                                                 |              |                                            |
|-----------------------------------------------|-------------------|---------------------------------------------------------------------------------------------------------------------------------------------------------------------------------|--------------|--------------------------------------------|
| FCFP_12                                       | 565998553         | 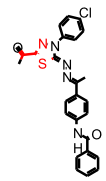<br><chem>[*]C(=[*])C1=N[*]][*]S</chem>                                                      | 0.194        | 6 out of 14                                |
| FCFP_12                                       | 567484887         | <br><chem>[*]N([*])[c]1:[cH]2</chem><br><chem>H]:[c](Cl):[cH]:[cH]</chem><br><chem>:1</chem> | 0.174        | 1 out of 2                                 |
| <b>Top Features for negative contribution</b> |                   |                                                                                                                                                                                 |              |                                            |
| <b>Fingerprint</b>                            | <b>Bit/Smiles</b> | <b>Feature Structure</b>                                                                                                                                                        | <b>Score</b> | <b>Multiple-Carcinogen in training set</b> |
| FCFP_12                                       | 1294255210        | <br><chem>[*]C(=[*])N[c](:[*]):</chem><br><chem>[*]</chem>                                   | -1.63        | 0 out of 12                                |
| FCFP_12                                       | 590925877         | <br><chem>[*]N[c](:[cH]:[*]):[c</chem><br><chem>H]:[*]</chem>                              | -0.998       | 1 out of 13                                |
| FCFP_12                                       | 1838187238        | <br><chem>[*]C(=[*])N[c]1:[cH]:</chem><br><chem>[cH]:[*]:[cH]:[cH]:1</chem>                | -0.859       | 0 out of 4                                 |



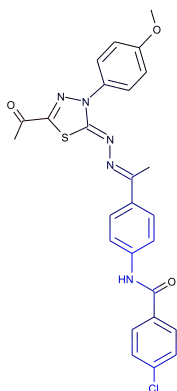

$C_{26}H_{22}ClN_5O_3S$

Molecular Weight: 520.00258

ALogP: 5.392

Rotatable Bonds: 7

Acceptors: 8

Donors: 1

## Model Prediction

Prediction: **Single-Carcinogen**

Probability: 0.156

Enrichment: 0.518

Bayesian Score: -12.9

Mahalanobis Distance: 13.2

Mahalanobis Distance p-value: 6.49e-005

Prediction: Positive if the Bayesian score is above the estimated best cutoff value from minimizing the false positive and false negative rate.

Probability: The estimated probability that the sample is in the positive category. This assumes that the Bayesian score follows a normal distribution and is different from the prediction using a cutoff.

Enrichment: An estimate of enrichment, that is, the increased likelihood (versus random) of this sample being in the category.

Bayesian Score: The standard Laplacian-modified Bayesian score.

Mahalanobis Distance: The Mahalanobis distance (MD) is the distance to the center of the training data. The larger the MD, the less trustworthy the prediction.

Mahalanobis Distance p-value: The p-value gives the fraction of training data with an MD greater than or equal to the one for the given sample, assuming normally distributed data. The smaller the p-value, the less trustworthy the prediction. For highly non-normal X properties (e.g., fingerprints), the MD p-value is wildly inaccurate.

## Structural Similar Compounds

| Name               | Reserpine                                                           | Simvastatin                                                         | Lovastatin                                                          |
|--------------------|---------------------------------------------------------------------|---------------------------------------------------------------------|---------------------------------------------------------------------|
| Structure          |                                                                     |                                                                     |                                                                     |
| Actual Endpoint    | Multiple-Carcinogen                                                 | Multiple-Carcinogen                                                 | Multiple-Carcinogen                                                 |
| Predicted Endpoint | Multiple-Carcinogen                                                 | Multiple-Carcinogen                                                 | Multiple-Carcinogen                                                 |
| Distance           | 0.752                                                               | 0.855                                                               | 0.872                                                               |
| Reference          | US FDA (Centre for Drug Eval.& Res./Off. Testing & Res.) Sept. 1997 | US FDA (Centre for Drug Eval.& Res./Off. Testing & Res.) Sept. 1997 | US FDA (Centre for Drug Eval.& Res./Off. Testing & Res.) Sept. 1997 |

## Model Applicability

Unknown features are fingerprint features in the query molecule, but not found or appearing too infrequently in the training set.

- OPS PC5 out of range. Value: 3.8956. Training min, max, SD, explained variance: -3.5268, 3.8048, 1.733, 0.0560.

## Feature Contribution

### Top features for positive contribution

| Fingerprint | Bit/Smiles | Feature Structure                                         | Score | Multiple-Carcinogen in training set |
|-------------|------------|-----------------------------------------------------------|-------|-------------------------------------|
| FCFP_12     | -581879738 | <br><chem>[*]NC(=O)[c]1:[cH]:[cH]:[cH]:[cH]:[cH]:1</chem> | 0.239 | 2 out of 4                          |

|                                               |                   |                                                                                                                                    |              |                                            |
|-----------------------------------------------|-------------------|------------------------------------------------------------------------------------------------------------------------------------|--------------|--------------------------------------------|
| FCFP_12                                       | 565998553         | 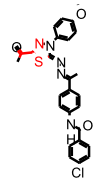<br>[*]C(=*)C1=N[*]1[*]S<br>1                   | 0.194        | 6 out of 14                                |
| FCFP_12                                       | -1549103449       | <br>[*]NC(=O)[c]:([*])[*]<br>]                  | 0.168        | 3 out of 7                                 |
| <b>Top Features for negative contribution</b> |                   |                                                                                                                                    |              |                                            |
| <b>Fingerprint</b>                            | <b>Bit/Smiles</b> | <b>Feature Structure</b>                                                                                                           | <b>Score</b> | <b>Multiple-Carcinogen in training set</b> |
| FCFP_12                                       | 1294255210        | <br>[*]C(=*)N[c]:([*])[*]<br>[*]                | -1.63        | 0 out of 12                                |
| FCFP_12                                       | 590925877         | <br>[*]N[c]:([cH]:[*])[*]:[c<br>H]:[*]        | -0.998       | 1 out of 13                                |
| FCFP_12                                       | -1508180856       | <br>[*][c]1:[cH]:[cH]:[c]<br>(Cl):[cH]:[cH]:1 | -0.859       | 0 out of 4                                 |



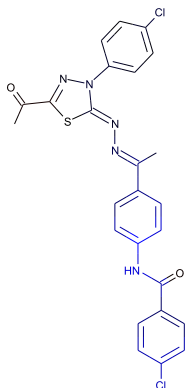

$C_{25}H_{19}Cl_2N_5O_2S$

Molecular Weight: 524.42166

ALogP: 6.073

Rotatable Bonds: 6

Acceptors: 7

Donors: 1

## Model Prediction

Prediction: Single-Carcinogen

Probability: 0.155

Enrichment: 0.514

Bayesian Score: -12.4

Mahalanobis Distance: 13.1

Mahalanobis Distance p-value: 8.92e-005

Prediction: Positive if the Bayesian score is above the estimated best cutoff value from minimizing the false positive and false negative rate.

Probability: The estimated probability that the sample is in the positive category. This assumes that the Bayesian score follows a normal distribution and is different from the prediction using a cutoff.

Enrichment: An estimate of enrichment, that is, the increased likelihood (versus random) of this sample being in the category.

Bayesian Score: The standard Laplacian-modified Bayesian score.

Mahalanobis Distance: The Mahalanobis distance (MD) is the distance to the center of the training data. The larger the MD, the less trustworthy the prediction.

Mahalanobis Distance p-value: The p-value gives the fraction of training data with an MD greater than or equal to the one for the given sample, assuming normally distributed data. The smaller the p-value, the less trustworthy the prediction. For highly non-normal X properties (e.g., fingerprints), the MD p-value is wildly inaccurate.

## Structural Similar Compounds

| Name               | Simvastatin                                                         | Lovastatin                                                          | Reserpine                                                           |
|--------------------|---------------------------------------------------------------------|---------------------------------------------------------------------|---------------------------------------------------------------------|
| Structure          |                                                                     |                                                                     |                                                                     |
| Actual Endpoint    | Multiple-Carcinogen                                                 | Multiple-Carcinogen                                                 | Multiple-Carcinogen                                                 |
| Predicted Endpoint | Multiple-Carcinogen                                                 | Multiple-Carcinogen                                                 | Multiple-Carcinogen                                                 |
| Distance           | 0.802                                                               | 0.828                                                               | 0.851                                                               |
| Reference          | US FDA (Centre for Drug Eval.& Res./Off. Testing & Res.) Sept. 1997 | US FDA (Centre for Drug Eval.& Res./Off. Testing & Res.) Sept. 1997 | US FDA (Centre for Drug Eval.& Res./Off. Testing & Res.) Sept. 1997 |

## Model Applicability

Unknown features are fingerprint features in the query molecule, but not found or appearing too infrequently in the training set.

1. All properties and OPS components are within expected ranges.

## Feature Contribution

### Top features for positive contribution

| Fingerprint | Bit/Smiles | Feature Structure                                              | Score | Multiple-Carcinogen in training set |
|-------------|------------|----------------------------------------------------------------|-------|-------------------------------------|
| FCFP_12     | -581879738 | <br><chem>[*]NC(=O)[c]1:[cH]:[cH]:[cH]:[cH]:[cH]:[cH]:1</chem> | 0.239 | 2 out of 4                          |

|                                               |                   |                                                                                                                                                                                  |              |                                            |
|-----------------------------------------------|-------------------|----------------------------------------------------------------------------------------------------------------------------------------------------------------------------------|--------------|--------------------------------------------|
| FCFP_12                                       | 565998553         | 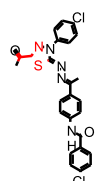<br><chem>[*]C(=[*])C1=N[*]][*]S</chem>                                                       | 0.194        | 6 out of 14                                |
| FCFP_12                                       | 567484887         | <br><chem>[*]N([*])[c]1:[cH]ap</chem><br><chem>H]:[c](Cl):[cH]:[cH]</chem><br><chem>:1</chem> | 0.174        | 1 out of 2                                 |
| <b>Top Features for negative contribution</b> |                   |                                                                                                                                                                                  |              |                                            |
| <b>Fingerprint</b>                            | <b>Bit/Smiles</b> | <b>Feature Structure</b>                                                                                                                                                         | <b>Score</b> | <b>Multiple-Carcinogen in training set</b> |
| FCFP_12                                       | 1294255210        | <br><chem>[*]C(=[*])N[c](:[*])[*]</chem><br><chem>[*]</chem>                                  | -1.63        | 0 out of 12                                |
| FCFP_12                                       | 590925877         | <br><chem>[*]N[c](:[cH]:[*])[*]:[c</chem><br><chem>H]:[*]</chem>                            | -0.998       | 1 out of 13                                |
| FCFP_12                                       | -1838187238       | <br><chem>[*]C(=[*])N[c]1:[cH]:</chem><br><chem>[cH]:[*]:[cH]:[cH]:1</chem>                 | -0.859       | 0 out of 4                                 |





# Sorafenib

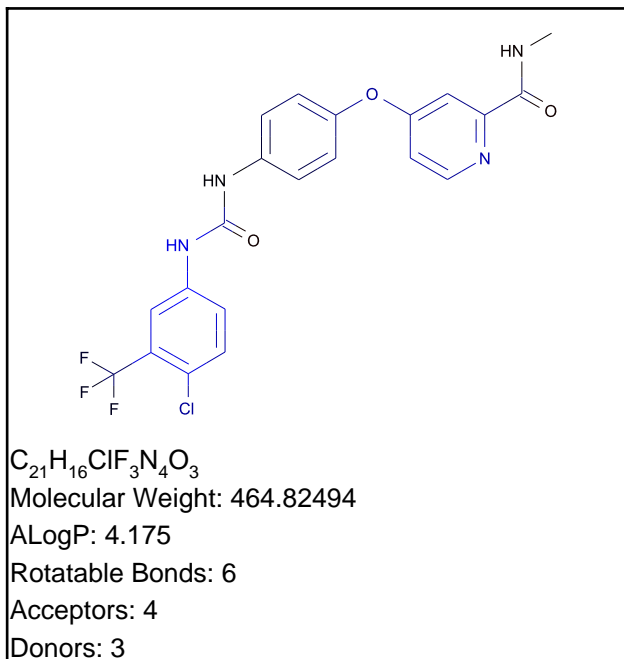

## Model Prediction

Prediction: Single-Carcinogen

Probability: 0.139

Enrichment: 0.461

Bayesian Score: -14.7

Mahalanobis Distance: 21.3

Mahalanobis Distance p-value: 4.93e-011

Prediction: Positive if the Bayesian score is above the estimated best cutoff value from minimizing the false positive and false negative rate.

Probability: The estimated probability that the sample is in the positive category. This assumes that the Bayesian score follows a normal distribution and is different from the prediction using a cutoff.

Enrichment: An estimate of enrichment, that is, the increased likelihood (versus random) of this sample being in the category.

Bayesian Score: The standard Laplacian-modified Bayesian score.

Mahalanobis Distance: The Mahalanobis distance (MD) is the distance to the center of the training data. The larger the MD, the less trustworthy the prediction.

Mahalanobis Distance p-value: The p-value gives the fraction of training data with an MD greater than or equal to the one for the given sample, assuming normally distributed data. The smaller the p-value, the less trustworthy the prediction. For highly non-normal X properties (e.g., fingerprints), the MD p-value is wildly inaccurate.

# TOPKAT\_Mouse\_Male\_FDA\_Single\_vs\_Multiple

## Structural Similar Compounds

| Name               | Glimepiride                                                                         | Bicalutamide                                                                        | Lansoprazole                                                                        |
|--------------------|-------------------------------------------------------------------------------------|-------------------------------------------------------------------------------------|-------------------------------------------------------------------------------------|
| Structure          | 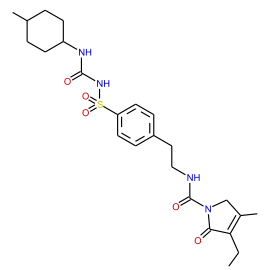 |  |  |
| Actual Endpoint    | Single-Carcinogen                                                                   | Single-Carcinogen                                                                   | Single-Carcinogen                                                                   |
| Predicted Endpoint | Single-Carcinogen                                                                   | Single-Carcinogen                                                                   | Single-Carcinogen                                                                   |
| Distance           | 0.626                                                                               | 0.700                                                                               | 0.866                                                                               |
| Reference          | US FDA (Centre for Drug Eval.& Res./Off. Testing & Res.) Sept. 1997                 | US FDA (Centre for Drug Eval.& Res./Off. Testing & Res.) Sept. 1997                 | US FDA (Centre for Drug Eval.& Res./Off. Testing & Res.) Sept. 1997                 |

## Model Applicability

Unknown features are fingerprint features in the query molecule, but not found or appearing too infrequently in the training set.

- All properties and OPS components are within expected ranges.

## Feature Contribution

### Top features for positive contribution

| Fingerprint | Bit/Smiles | Feature Structure                                                                                      | Score | Multiple-Carcinogen in training set |
|-------------|------------|--------------------------------------------------------------------------------------------------------|-------|-------------------------------------|
| FCFP_12     | 1499521844 | 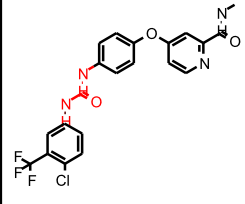<br>[*]NC(=O)N[*] | 0.39  | 5 out of 9                          |

|                                               |                   |                                                                                                                                    |              |                                            |
|-----------------------------------------------|-------------------|------------------------------------------------------------------------------------------------------------------------------------|--------------|--------------------------------------------|
| FCFP_12                                       | -904785030        | 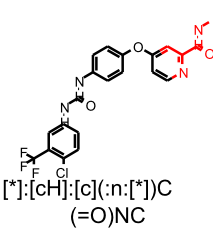<br>[*]:[cH]:[c]([:n:])*C<br>(=O)NC              | 0.174        | 1 out of 2                                 |
| FCFP_12                                       | -1549103449       | <br>[*]NC(=O)[c]([:*]):[*]<br>]                 | 0.168        | 3 out of 7                                 |
| <b>Top Features for negative contribution</b> |                   |                                                                                                                                    |              |                                            |
| <b>Fingerprint</b>                            | <b>Bit/Smiles</b> | <b>Feature Structure</b>                                                                                                           | <b>Score</b> | <b>Multiple-Carcinogen in training set</b> |
| FCFP_12                                       | 1294255210        | <br>[*]C(=[*])N[c]([:*]):<br>[*]                | -1.63        | 0 out of 12                                |
| FCFP_12                                       | 590925877         | <br>[*]N[c]([:cH]:[*]):[c<br>H]:[*]           | -0.998       | 1 out of 13                                |
| FCFP_12                                       | -1462709112       | <br>[*]C(=[*])[c]1:[cH]:[<br>*]:[cH]:[cH]:n:1 | -0.994       | 0 out of 5                                 |



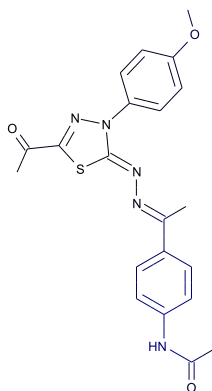

$C_{21}H_{21}N_5O_3S$

Molecular Weight: 423.48813

ALogP: 3.064

Rotatable Bonds: 6

Acceptors: 8

Donors: 1

## Model Prediction

Prediction: Mild

Probability: 0.6

Enrichment: 0.871

Bayesian Score: -5.01

Mahalanobis Distance: 10.5

Mahalanobis Distance p-value: 0.0274

Prediction: Positive if the Bayesian score is above the estimated best cutoff value from minimizing the false positive and false negative rate.

Probability: The estimated probability that the sample is in the positive category. This assumes that the Bayesian score follows a normal distribution and is different from the prediction using a cutoff.

Enrichment: An estimate of enrichment, that is, the increased likelihood (versus random) of this sample being in the category.

Bayesian Score: The standard Laplacian-modified Bayesian score.

Mahalanobis Distance: The Mahalanobis distance (MD) is the distance to the center of the training data. The larger the MD, the less trustworthy the prediction.

Mahalanobis Distance p-value: The p-value gives the fraction of training data with an MD greater than or equal to the one for the given sample, assuming normally distributed data. The smaller the p-value, the less trustworthy the prediction. For highly non-normal X properties (e.g., fingerprints), the MD p-value is wildly inaccurate.

## Structural Similar Compounds

| Name               | COLCHICINE       | 1;8;9-ANTHRACENETRIOL; TRIACETATE | 1;4-PENTADIENE-3-ONE;1;5-BIS(4-(2;3-DIDEHYDROTRIAZIRIDINY L)PHENYL)- |
|--------------------|------------------|-----------------------------------|----------------------------------------------------------------------|
| Structure          |                  |                                   |                                                                      |
| Actual Endpoint    | Moderate_Severe  | Moderate_Severe                   | Mild                                                                 |
| Predicted Endpoint | Moderate_Severe  | Moderate_Severe                   | Mild                                                                 |
| Distance           | 0.622            | 0.783                             | 0.801                                                                |
| Reference          | AJOPAA 31;837;48 | BJOPAL 53;819;69                  | 28ZPAK-;123;72                                                       |

## Model Applicability

Unknown features are fingerprint features in the query molecule, but not found or appearing too infrequently in the training set.

- All properties and OPS components are within expected ranges.

## Feature Contribution

### Top features for positive contribution

| Fingerprint | Bit/Smiles | Feature Structure                                    | Score | Moderate_Severe in training set |
|-------------|------------|------------------------------------------------------|-------|---------------------------------|
| FCFP_10     | 346218766  | <br>CO[c]1:[cH]:[cH]:[cH]:[cH]:[cH]:[cH]:[cH]:[cH]:1 | 0.197 | 30 out of 37                    |

| FCFP_10                                | 3           | 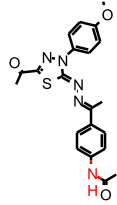<br>[*]N[*]                                                       | 0.165  | 383 out of 491                  |
|----------------------------------------|-------------|------------------------------------------------------------------------------------------------------------------------------------------------------|--------|---------------------------------|
| Top Features for negative contribution |             |                                                                                                                                                      |        |                                 |
| Fingerprint                            | Bit/Smiles  | Feature Structure                                                                                                                                    | Score  | Moderate_Severe in training set |
| FCFP_10                                | -1977641857 | <br>[*]:[cH]:[c](OC):[cH]<br>:[*]                                 | -0.78  | 4 out of 15                     |
| FCFP_10                                | -178394671  | <br>[*]C(=[*])[c]1:[cH]:[cH]:[c](NC(=O)C):[cH]<br>:[cH]:1         | -0.507 | 0 out of 1                      |
| FCFP_10                                | -790336137  | <br>[*]C(=[*])N[c]1:[cH]:[cH]:[c]:[cH]:[cH]:[cH]:1<br>C(=[*])[*] | -0.507 | 0 out of 1                      |

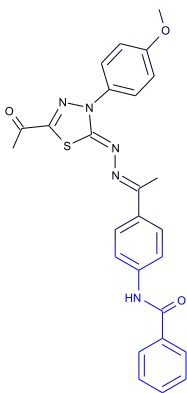

$C_{26}H_{23}N_5O_3S$   
 Molecular Weight: 485.55751  
 ALogP: 4.728  
 Rotatable Bonds: 7  
 Acceptors: 8  
 Donors: 1

## Model Prediction

Prediction: Mild

Probability: 0.0156

Enrichment: 0.0227

Bayesian Score: -13.9

Mahalanobis Distance: 10.9

Mahalanobis Distance p-value: 0.00761

Prediction: Positive if the Bayesian score is above the estimated best cutoff value from minimizing the false positive and false negative rate.

Probability: The estimated probability that the sample is in the positive category. This assumes that the Bayesian score follows a normal distribution and is different from the prediction using a cutoff.

Enrichment: An estimate of enrichment, that is, the increased likelihood (versus random) of this sample being in the category.  
 Bayesian Score: The standard Laplacian-modified Bayesian score.

Mahalanobis Distance: The Mahalanobis distance (MD) is the distance to the center of the training data. The larger the MD, the less trustworthy the prediction.

Mahalanobis Distance p-value: The p-value gives the fraction of training data with an MD greater than or equal to the one for the given sample, assuming normally distributed data. The smaller the p-value, the less trustworthy the prediction. For highly non-normal X properties (e.g., fingerprints), the MD p-value is wildly inaccurate.

## Structural Similar Compounds

| Name               | COLCHICINE       | ANTHRAQUINONE; 1;1'-IMINODI- | Benzoic acid; p-(N-butyl-2-(butylamino)acetamido); butyl ester; |
|--------------------|------------------|------------------------------|-----------------------------------------------------------------|
| Structure          |                  |                              |                                                                 |
| Actual Endpoint    | Moderate_Severe  | Mild                         | Moderate_Severe                                                 |
| Predicted Endpoint | Moderate_Severe  | Mild                         | Moderate_Severe                                                 |
| Distance           | 0.779            | 0.791                        | 0.833                                                           |
| Reference          | AJOPAA 31;837;48 | 28ZPAK-;125;72               | Arzneimittel-Forschung 8;609;58                                 |

## Model Applicability

Unknown features are fingerprint features in the query molecule, but not found or appearing too infrequently in the training set.

1. All properties and OPS components are within expected ranges.

## Feature Contribution

### Top features for positive contribution

| Fingerprint | Bit/Smiles | Feature Structure | Score | Moderate_Severe in training set |
|-------------|------------|-------------------|-------|---------------------------------|
| FCFP_10     | 346218766  |                   | 0.197 | 30 out of 37                    |



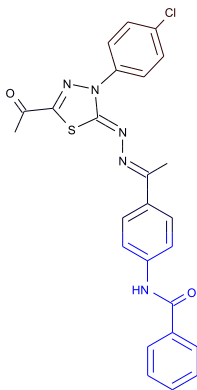

C<sub>25</sub>H<sub>20</sub>ClN<sub>5</sub>O<sub>2</sub>S

Molecular Weight: 489.97659

ALogP: 5.409

Rotatable Bonds: 6

Acceptors: 7

Donors: 1

## Model Prediction

Prediction: Mild

Probability: 0.0614

Enrichment: 0.0892

Bayesian Score: -11.7

Mahalanobis Distance: 11.2

Mahalanobis Distance p-value: 0.00264

Prediction: Positive if the Bayesian score is above the estimated best cutoff value from minimizing the false positive and false negative rate.

Probability: The estimated probability that the sample is in the positive category. This assumes that the Bayesian score follows a normal distribution and is different from the prediction using a cutoff.

Enrichment: An estimate of enrichment, that is, the increased likelihood (versus random) of this sample being in the category.

Bayesian Score: The standard Laplacian-modified Bayesian score.

Mahalanobis Distance: The Mahalanobis distance (MD) is the distance to the center of the training data. The larger the MD, the less trustworthy the prediction.

Mahalanobis Distance p-value: The p-value gives the fraction of training data with an MD greater than or equal to the one for the given sample, assuming normally distributed data. The smaller the p-value, the less trustworthy the prediction. For highly non-normal X properties (e.g., fingerprints), the MD p-value is wildly inaccurate.

## Structural Similar Compounds

| Name               | ANTHRAQUINONE; 1;1'-IMINODI- | 1-BENZOYLAMINO-4-METHOXY-5-CHLORANTHRAQUINONE | 2-(1'-ANTHRAQUINONYL)-AMINOBENZANTHRONE |
|--------------------|------------------------------|-----------------------------------------------|-----------------------------------------|
| Structure          |                              |                                               |                                         |
| Actual Endpoint    | Mild                         | Mild                                          | Mild                                    |
| Predicted Endpoint | Mild                         | Mild                                          | Mild                                    |
| Distance           | 0.697                        | 0.762                                         | 0.807                                   |
| Reference          | 28ZPAK-;125;72               | 28ZPAK-;90;72                                 | 28ZPAK-;126;72                          |

## Model Applicability

Unknown features are fingerprint features in the query molecule, but not found or appearing too infrequently in the training set.

1. All properties and OPS components are within expected ranges.

## Feature Contribution

### Top features for positive contribution

| Fingerprint | Bit/Smiles | Feature Structure                                 | Score | Moderate_Severe in training set |
|-------------|------------|---------------------------------------------------|-------|---------------------------------|
| FCFP_10     | 1508180856 | <br>[*][c]1:[cH]:[cH]:[c]:[c]<br>(Cl):[cH]:[cH]:1 | 0.329 | 16 out of 17                    |



|                                               |                   |                                                                                                                                                   |              |                                            |
|-----------------------------------------------|-------------------|---------------------------------------------------------------------------------------------------------------------------------------------------|--------------|--------------------------------------------|
| FCFP_10                                       | -745491832        | 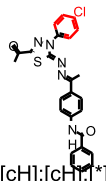<br>Cl[c]1:[cH]:[cH]:[*]:<br>[cH]:[cH]:1                       | 0.304        | 29 out of 32                               |
| FCFP_10                                       | 567484887         | <br>[*]N[*])[c]1:[cH]:[c<br>H]:[c](Cl):[cH]:[cH]<br>:1         | 0.273        | 9 out of 10                                |
| <b>Top Features for negative contribution</b> |                   |                                                                                                                                                   |              |                                            |
| <b>Fingerprint</b>                            | <b>Bit/Smiles</b> | <b>Feature Structure</b>                                                                                                                          | <b>Score</b> | <b>Moderate_Severe<br/>in training set</b> |
| FCFP_10                                       | 384221478         | <br>[*]:[c](:[*])NC(=O)[c<br>]1:[cH]:[cH]:[cH]:[c<br>H]:[cH]:1 | -1.29        | 0 out of 4                                 |
| FCFP_10                                       | -581879738        | <br>[*]NC(=O)[c]1:[cH]:[c<br>H]:[*]:[cH]:[cH]:1               | -1.29        | 0 out of 4                                 |
| FCFP_10                                       | -1925475824       | <br>[*]:[cH]:[c](:[cH]<br>])C(=O)N[c](:[*]):[*]<br>]         | -1.29        | 0 out of 4                                 |

18c

## TOPKAT\_Ocular\_Irritancy\_Mild\_vs\_Moderate\_Severe

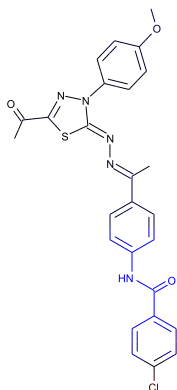C<sub>26</sub>H<sub>22</sub>ClN<sub>5</sub>O<sub>3</sub>S

Molecular Weight: 520.00258

ALogP: 5.392

Rotatable Bonds: 7

Acceptors: 8

Donors: 1

**Model Prediction**

Prediction: Mild

Probability: 0.169

Enrichment: 0.245

Bayesian Score: -9.72

Mahalanobis Distance: 11.6

Mahalanobis Distance p-value: 0.000456

Prediction: Positive if the Bayesian score is above the estimated best cutoff value from minimizing the false positive and false negative rate.

Probability: The estimated probability that the sample is in the positive category. This assumes that the Bayesian score follows a normal distribution and is different from the prediction using a cutoff.

Enrichment: An estimate of enrichment, that is, the increased likelihood (versus random) of this sample being in the category.

Bayesian Score: The standard Laplacian-modified Bayesian score.

Mahalanobis Distance: The Mahalanobis distance (MD) is the distance to the center of the training data. The larger the MD, the less trustworthy the prediction.

Mahalanobis Distance p-value: The p-value gives the fraction of training data with an MD greater than or equal to the one for the given sample, assuming normally distributed data. The smaller the p-value, the less trustworthy the prediction. For highly non-normal X properties (e.g., fingerprints), the MD p-value is wildly inaccurate.

**Structural Similar Compounds**

| Name               | ANTHRAQUINONE; 1;1'-IMINODI- | COLCHICINE       | Benzoic acid; p-(N-butyl-2-(butylamino)acetamido)-; butyl ester; |
|--------------------|------------------------------|------------------|------------------------------------------------------------------|
| Structure          |                              |                  |                                                                  |
| Actual Endpoint    | Mild                         | Moderate_Severe  | Moderate_Severe                                                  |
| Predicted Endpoint | Mild                         | Moderate_Severe  | Moderate_Severe                                                  |
| Distance           | 0.815                        | 0.864            | 0.876                                                            |
| Reference          | 28ZPAK-;125;72               | AJOPAA 31;837;48 | Arzneimittel-Forschung 8;609;58                                  |

**Model Applicability**

Unknown features are fingerprint features in the query molecule, but not found or appearing too infrequently in the training set.

- All properties and OPS components are within expected ranges.

**Feature Contribution****Top features for positive contribution**

| Fingerprint | Bit/Smiles | Feature Structure                                       | Score | Moderate_Severe in training set |
|-------------|------------|---------------------------------------------------------|-------|---------------------------------|
| FCFP_10     | -149636017 | <br>[*]C(=[*])[c]1:[c]H:[c]H:[c]H:[c](Cl):[c]H]:[c]H]:1 | 0.352 | 7 out of 7                      |

|                                               |                   |                                                                                                                                             |              |                                            |
|-----------------------------------------------|-------------------|---------------------------------------------------------------------------------------------------------------------------------------------|--------------|--------------------------------------------|
| FCFP_10                                       | -1508180856       | 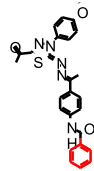<br>[*][c]1:[cH]:[cH]:[*]<br>(Cl):[cH]:[cH]:1            | 0.329        | 16 out of 17                               |
| FCFP_10                                       | -745491832        | <br>Cl[c]1:[cH]:[cH]:[*]:<br>[cH]:[cH]:1                 | 0.304        | 29 out of 32                               |
| <b>Top Features for negative contribution</b> |                   |                                                                                                                                             |              |                                            |
| <b>Fingerprint</b>                            | <b>Bit/Smiles</b> | <b>Feature Structure</b>                                                                                                                    | <b>Score</b> | <b>Moderate_Severe<br/>in training set</b> |
| FCFP_10                                       | 1175232969        | <br>[*]:[cH]:[c](NC(=O)[c<br>]([*]):[*]):[cH]:[*]<br>]   | -1.29        | 0 out of 4                                 |
| FCFP_10                                       | -1925475824       | <br>[*]:[cH]:[c]:[cH]:[c]<br>])C(=O)N[c]([*]):[*]<br>] | -1.29        | 0 out of 4                                 |
| FCFP_10                                       | -581879738        | <br>[*]NC(=O)[c]1:[cH]:[c<br>H]:[*]:[cH]:[cH]:1        | -1.29        | 0 out of 4                                 |

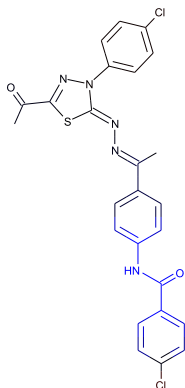

$C_{25}H_{19}Cl_2N_5O_2S$

Molecular Weight: 524.42166

ALogP: 6.073

Rotatable Bonds: 6

Acceptors: 7

Donors: 1

## Model Prediction

Prediction: Mild

Probability: 0.297

Enrichment: 0.431

Bayesian Score: -8.23

Mahalanobis Distance: 11.4

Mahalanobis Distance p-value: 0.000955

Prediction: Positive if the Bayesian score is above the estimated best cutoff value from minimizing the false positive and false negative rate.

Probability: The estimated probability that the sample is in the positive category. This assumes that the Bayesian score follows a normal distribution and is different from the prediction using a cutoff.

Enrichment: An estimate of enrichment, that is, the increased likelihood (versus random) of this sample being in the category.

Bayesian Score: The standard Laplacian-modified Bayesian score.

Mahalanobis Distance: The Mahalanobis distance (MD) is the distance to the center of the training data. The larger the MD, the less trustworthy the prediction.

Mahalanobis Distance p-value: The p-value gives the fraction of training data with an MD greater than or equal to the one for the given sample, assuming normally distributed data. The smaller the p-value, the less trustworthy the prediction. For highly non-normal X properties (e.g., fingerprints), the MD p-value is wildly inaccurate.

## Structural Similar Compounds

| Name               | ANTHRAQUINONE; 1;1'-IMINODI- | 2-(1'-ANTHRAQUINONYL)-AMINOBENZANTHRONE | 1-BENZOYLAMINO-4-METHOXY-5-CHLORANTHRAQUINONE |
|--------------------|------------------------------|-----------------------------------------|-----------------------------------------------|
| Structure          |                              |                                         |                                               |
| Actual Endpoint    | Mild                         | Mild                                    | Mild                                          |
| Predicted Endpoint | Mild                         | Mild                                    | Mild                                          |
| Distance           | 0.745                        | 0.813                                   | 0.838                                         |
| Reference          | 28ZPAK-;125;72               | 28ZPAK-;126;72                          | 28ZPAK-;90;72                                 |

## Model Applicability

Unknown features are fingerprint features in the query molecule, but not found or appearing too infrequently in the training set.

1. All properties and OPS components are within expected ranges.

## Feature Contribution

### Top features for positive contribution

| Fingerprint | Bit/Smiles | Feature Structure                                        | Score | Moderate_Severe in training set |
|-------------|------------|----------------------------------------------------------|-------|---------------------------------|
| FCFP_10     | 149636017  | <br>[*]C(=[*])[c]1:[cH]1<br>cH]:[c](Cl):[cH]:[cH]<br>]:1 | 0.352 | 7 out of 7                      |

|                                               |                   |                                                                                                                                                               |              |                                            |
|-----------------------------------------------|-------------------|---------------------------------------------------------------------------------------------------------------------------------------------------------------|--------------|--------------------------------------------|
| FCFP_10                                       | -1508180856       | 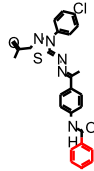<br>[*][c]1:[cH]:[cH]:[cH]:[c]<br>(Cl):[cH]:[cH]:1                         | 0.329        | 16 out of 17                               |
| FCFP_10                                       | -745491832        | <br>Cl[c]1:[cH]:[cH]:[*]:<br>[cH]:[cH]:1                                   | 0.304        | 29 out of 32                               |
| <b>Top Features for negative contribution</b> |                   |                                                                                                                                                               |              |                                            |
| <b>Fingerprint</b>                            | <b>Bit/Smiles</b> | <b>Feature Structure</b>                                                                                                                                      | <b>Score</b> | <b>Moderate_Severe<br/>in training set</b> |
| FCFP_10                                       | 384221478         | <br>[*]:[c]:[*])NC(=O)[c]<br>]1:[cH]:[cH]:[cH]:[c<br>H]:[cH]:1             | -1.29        | 0 out of 4                                 |
| FCFP_10                                       | 241406177         | <br>[*]:[cH]:[c](NC(=O)[c]<br>]1:[cH]:[cH]:[*]:[cH<br>]:[cH]:1):[cH]:[*] | -1.29        | 0 out of 4                                 |
| FCFP_10                                       | 1175232969        | <br>[*]:[cH]:[c](NC(=O)[c]<br>]1:[cH]:[cH]:[*]:[cH]:[*]<br>]             | -1.29        | 0 out of 4                                 |

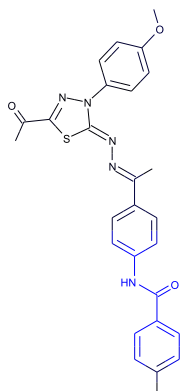

$C_{27}H_{25}N_5O_3S$

Molecular Weight: 499.58409

ALogP: 5.214

Rotatable Bonds: 7

Acceptors: 8

Donors: 1

## Model Prediction

Prediction: Mild

Probability: 0.0898

Enrichment: 0.13

Bayesian Score: -11

Mahalanobis Distance: 11

Mahalanobis Distance p-value: 0.00424

Prediction: Positive if the Bayesian score is above the estimated best cutoff value from minimizing the false positive and false negative rate.

Probability: The estimated probability that the sample is in the positive category. This assumes that the Bayesian score follows a normal distribution and is different from the prediction using a cutoff.

Enrichment: An estimate of enrichment, that is, the increased likelihood (versus random) of this sample being in the category.

Bayesian Score: The standard Laplacian-modified Bayesian score.

Mahalanobis Distance: The Mahalanobis distance (MD) is the distance to the center of the training data. The larger the MD, the less trustworthy the prediction.

Mahalanobis Distance p-value: The p-value gives the fraction of training data with an MD greater than or equal to the one for the given sample, assuming normally distributed data. The smaller the p-value, the less trustworthy the prediction. For highly non-normal X properties (e.g., fingerprints), the MD p-value is wildly inaccurate.

## Structural Similar Compounds

| Name               | ANTHRAQUINONE; 1;1'-IMINODI- | COLCHICINE       | Benzoic acid; p-(N-butyl-2-(butylamino)acetamido)-; butyl ester; |
|--------------------|------------------------------|------------------|------------------------------------------------------------------|
| Structure          |                              |                  |                                                                  |
| Actual Endpoint    | Mild                         | Moderate_Severe  | Moderate_Severe                                                  |
| Predicted Endpoint | Mild                         | Moderate_Severe  | Moderate_Severe                                                  |
| Distance           | 0.800                        | 0.829            | 0.850                                                            |
| Reference          | 28ZPAK-;125;72               | AJOPAA 31;837;48 | Arzneimittel-Forschung 8;609;58                                  |

## Model Applicability

Unknown features are fingerprint features in the query molecule, but not found or appearing too infrequently in the training set.

- All properties and OPS components are within expected ranges.

## Feature Contribution

### Top features for positive contribution

| Fingerprint | Bit/Smiles | Feature Structure  | Score | Moderate_Severe in training set |
|-------------|------------|--------------------|-------|---------------------------------|
| FCFP_10     | 136120670  | <br>[*]:[c](:[*])C | 0.206 | 53 out of 65                    |

|                                               |                   |                                                                                                                                                            |              |                                            |
|-----------------------------------------------|-------------------|------------------------------------------------------------------------------------------------------------------------------------------------------------|--------------|--------------------------------------------|
| FCFP_10                                       | 346218766         | 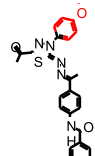<br>CO[c]1:[cH]:[cH]:[cH]:[*]:<br>[cH]:[cH]:1                           | 0.197        | 30 out of 37                               |
| FCFP_10                                       | 3                 | <br>[*]N[*]                                                             | 0.165        | 383 out of 491                             |
| <b>Top Features for negative contribution</b> |                   |                                                                                                                                                            |              |                                            |
| <b>Fingerprint</b>                            | <b>Bit/Smiles</b> | <b>Feature Structure</b>                                                                                                                                   | <b>Score</b> | <b>Moderate_Severe<br/>in training set</b> |
| FCFP_10                                       | 241406177         | <br>[*]:[cH]:[c](NC(=O)[c<br>]1:[cH]:[cH]:[*]:[cH<br>]:[cH]:1):[cH]:[*] | -1.29        | 0 out of 4                                 |
| FCFP_10                                       | -1925475824       | <br>[*]:[cH]:[c](:[cH]:[c<br>)C(=O)N[c](:[*]):[*<br>]                  | -1.29        | 0 out of 4                                 |
| FCFP_10                                       | 384221478         | <br>[*]:[c](:[*])NC(=O)[c<br>]1:[cH]:[cH]:[cH]:[c<br>H]:[cH]:1        | -1.29        | 0 out of 4                                 |

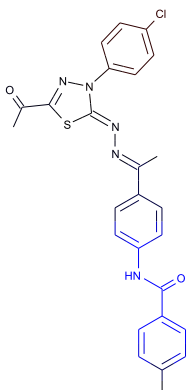

C<sub>26</sub>H<sub>22</sub>ClN<sub>5</sub>O<sub>2</sub>S

Molecular Weight: 504.00318

ALogP: 5.895

Rotatable Bonds: 6

Acceptors: 7

Donors: 1

## Model Prediction

Prediction: Mild

Probability: 0.241

Enrichment: 0.35

Bayesian Score: -8.83

Mahalanobis Distance: 11.3

Mahalanobis Distance p-value: 0.00155

Prediction: Positive if the Bayesian score is above the estimated best cutoff value from minimizing the false positive and false negative rate.

Probability: The estimated probability that the sample is in the positive category. This assumes that the Bayesian score follows a normal distribution and is different from the prediction using a cutoff.

Enrichment: An estimate of enrichment, that is, the increased likelihood (versus random) of this sample being in the category.

Bayesian Score: The standard Laplacian-modified Bayesian score.

Mahalanobis Distance: The Mahalanobis distance (MD) is the distance to the center of the training data. The larger the MD, the less trustworthy the prediction.

Mahalanobis Distance p-value: The p-value gives the fraction of training data with an MD greater than or equal to the one for the given sample, assuming normally distributed data. The smaller the p-value, the less trustworthy the prediction. For highly non-normal X properties (e.g., fingerprints), the MD p-value is wildly inaccurate.

## Structural Similar Compounds

| Name               | ANTHRAQUINONE; 1;1'-IMINODI- | 2-(1'-ANTHRAQUINONYL)-AMINOBENZANTHRONE | 1-BENZOYLAMINO-4-METHOXY-5-CHLORANTHRAQUINONE |
|--------------------|------------------------------|-----------------------------------------|-----------------------------------------------|
| Structure          |                              |                                         |                                               |
| Actual Endpoint    | Mild                         | Mild                                    | Mild                                          |
| Predicted Endpoint | Mild                         | Mild                                    | Mild                                          |
| Distance           | 0.723                        | 0.804                                   | 0.813                                         |
| Reference          | 28ZPAK-;125;72               | 28ZPAK-;126;72                          | 28ZPAK-;90;72                                 |

## Model Applicability

Unknown features are fingerprint features in the query molecule, but not found or appearing too infrequently in the training set.

1. All properties and OPS components are within expected ranges.

## Feature Contribution

### Top features for positive contribution

| Fingerprint | Bit/Smiles | Feature Structure                             | Score | Moderate_Severe in training set |
|-------------|------------|-----------------------------------------------|-------|---------------------------------|
| FCFP_10     | 1508180856 | <br>[*][c]1:[cH]:[cH]:[c]<br>(Cl):[cH]:[cH]:1 | 0.329 | 16 out of 17                    |



|                                               |                   |                                                                                                                                                                 |              |                                        |
|-----------------------------------------------|-------------------|-----------------------------------------------------------------------------------------------------------------------------------------------------------------|--------------|----------------------------------------|
| FCFP_10                                       | -745491832        | 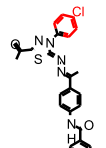<br><chem>Cl[c]1:[cH]:[cH]:[*]:[cH]:[cH]:1</chem>                            | 0.304        | 29 out of 32                           |
| FCFP_10                                       | 567484887         | <br><chem>[*]N([*])[c]1:[cH]:[cH]:[cH]:[c](Cl):[cH]:[cH]:1</chem>            | 0.273        | 9 out of 10                            |
| <b>Top Features for negative contribution</b> |                   |                                                                                                                                                                 |              |                                        |
| <b>Fingerprint</b>                            | <b>Bit/Smiles</b> | <b>Feature Structure</b>                                                                                                                                        | <b>Score</b> | <b>Moderate_Severe in training set</b> |
| FCFP_10                                       | 241406177         | <br><chem>[*]:[cH]:[c](NC(=O)[c]1:[cH]:[cH]:[*]:[cH]:[cH]:1):[cH]:[*]</chem> | -1.29        | 0 out of 4                             |
| FCFP_10                                       | 384221478         | <br><chem>[*]:[c]:[*]NC(=O)[c]1:[cH]:[cH]:[cH]:[cH]:[cH]:1</chem>           | -1.29        | 0 out of 4                             |
| FCFP_10                                       | 1175232969        | <br><chem>[*]:[cH]:[c](NC(=O)[c]1:[cH]:[cH]:[*]:[cH]:[cH]:1)</chem>        | -1.29        | 0 out of 4                             |

# Sorafenib

# TOPKAT\_Ocular\_Irritancy\_Mild\_vs\_Moderate\_Severe

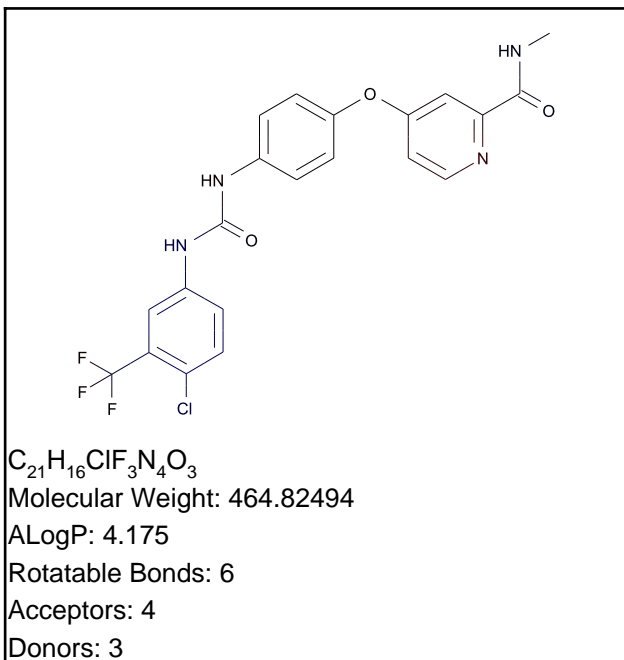

## Model Prediction

Prediction: Mild

Probability: 0.776

Enrichment: 1.13

Bayesian Score: -1.8

Mahalanobis Distance: 8.95

Mahalanobis Distance p-value: 0.537

Prediction: Positive if the Bayesian score is above the estimated best cutoff value from minimizing the false positive and false negative rate.

Probability: The estimated probability that the sample is in the positive category. This assumes that the Bayesian score follows a normal distribution and is different from the prediction using a cutoff.

Enrichment: An estimate of enrichment, that is, the increased likelihood (versus random) of this sample being in the category.

Bayesian Score: The standard Laplacian-modified Bayesian score.

Mahalanobis Distance: The Mahalanobis distance (MD) is the distance to the center of the training data. The larger the MD, the less trustworthy the prediction.

Mahalanobis Distance p-value: The p-value gives the fraction of training data with an MD greater than or equal to the one for the given sample, assuming normally distributed data. The smaller the p-value, the less trustworthy the prediction. For highly non-normal X properties (e.g., fingerprints), the MD p-value is wildly inaccurate.

## Structural Similar Compounds

| Name               | 4;4'-DIAMINO-1;1'-DIANTHRIMIDE                                                      | 5-NORBORNENE-2;3-DICARBOXYLIC ACID; 1;4;5;6;7;7-HEXACHLORO-                         | METHANE;TRIS(4-AMINOPHENYL)-                                                        |
|--------------------|-------------------------------------------------------------------------------------|-------------------------------------------------------------------------------------|-------------------------------------------------------------------------------------|
| Structure          | 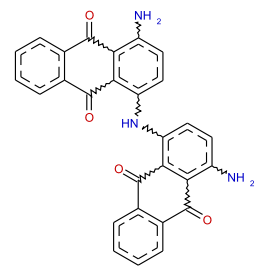 |  |  |
| Actual Endpoint    | Mild                                                                                | Moderate_Severe                                                                     | Moderate_Severe                                                                     |
| Predicted Endpoint | Mild                                                                                | Moderate_Severe                                                                     | Moderate_Severe                                                                     |
| Distance           | 0.799                                                                               | 0.816                                                                               | 0.827                                                                               |
| Reference          | 28ZPAK-;125;72                                                                      | 28ZPAK-;92;72                                                                       | 28ZPAK-;73;72                                                                       |

## Model Applicability

Unknown features are fingerprint features in the query molecule, but not found or appearing too infrequently in the training set.

- All properties and OPS components are within expected ranges.

## Feature Contribution

### Top features for positive contribution

| Fingerprint | Bit/Smiles  | Feature Structure                                                                                                                        | Score | Moderate_Severe in training set |
|-------------|-------------|------------------------------------------------------------------------------------------------------------------------------------------|-------|---------------------------------|
| FCFP_10     | -1695756380 | 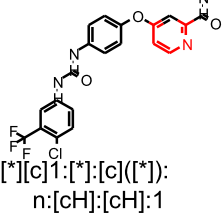<br><chem>[*][c]1:[*]:[c]([*]):n:[cH]:[cH]:1</chem> | 0.285 | 10 out of 11                    |

|                                               |                   |                                                                                                                                                                 |              |                                        |
|-----------------------------------------------|-------------------|-----------------------------------------------------------------------------------------------------------------------------------------------------------------|--------------|----------------------------------------|
| FCFP_10                                       | -124655670        | 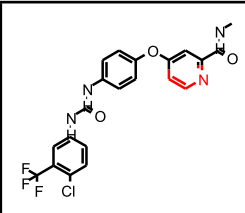<br><chem>[*]:[cH]:[cH]:n:[*]</chem>                                          | 0.259        | 14 out of 16                           |
| FCFP_10                                       | -885550502        | <br><chem>[*]C(=[*])NC</chem>                                                | 0.239        | 54 out of 64                           |
| <b>Top Features for negative contribution</b> |                   |                                                                                                                                                                 |              |                                        |
| <b>Fingerprint</b>                            | <b>Bit/Smiles</b> | <b>Feature Structure</b>                                                                                                                                        | <b>Score</b> | <b>Moderate_Severe in training set</b> |
| FCFP_10                                       | 2104062943        | <br><chem>[*]C([*])([*])[c]1:[cH]:[*]:[cH]:[cH]:[c]:1Cl</chem>               | -0.745       | 7 out of 24                            |
| FCFP_10                                       | -174293376        | <br><chem>[*]N([c]([*])[cH]:[cH]:[c](Cl):[c](-[cH]:1)C([*])([*])[*])</chem> | -0.507       | 0 out of 1                             |
| FCFP_10                                       | -1549103449       | <br><chem>[*]NC(=O)[c]([*]):[*]</chem>                                     | -0.504       | 2 out of 6                             |

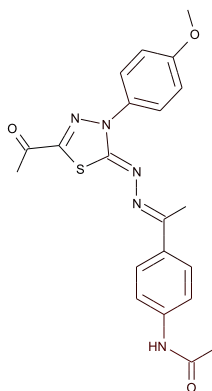

$C_{21}H_{21}N_5O_3S$

Molecular Weight: 423.48813

ALogP: 3.064

Rotatable Bonds: 6

Acceptors: 8

Donors: 1

## Model Prediction

**Prediction: Irritant**

Probability: 1

Enrichment: 1.18

Bayesian Score: 2.56

Mahalanobis Distance: 8.04

Mahalanobis Distance p-value: 0.917

Prediction: Positive if the Bayesian score is above the estimated best cutoff value from minimizing the false positive and false negative rate.

Probability: The estimated probability that the sample is in the positive category. This assumes that the Bayesian score follows a normal distribution and is different from the prediction using a cutoff.

Enrichment: An estimate of enrichment, that is, the increased likelihood (versus random) of this sample being in the category.

Bayesian Score: The standard Laplacian-modified Bayesian score.

Mahalanobis Distance: The Mahalanobis distance (MD) is the distance to the center of the training data. The larger the MD, the less trustworthy the prediction.

Mahalanobis Distance p-value: The p-value gives the fraction of training data with an MD greater than or equal to the one for the given sample, assuming normally distributed data. The smaller the p-value, the less trustworthy the prediction. For highly non-normal X properties (e.g., fingerprints), the MD p-value is wildly inaccurate.

## Structural Similar Compounds

| Name               | COLCHICINE       | 1;8;9-ANTHRACENETRIOL; TRIACETATE | 1;4-PENTADIENE-3-ONE;1;5-BIS(4-(2;3-DIDEHYDROTRIAZIRIDINY L)PHENYL)- |
|--------------------|------------------|-----------------------------------|----------------------------------------------------------------------|
| Structure          |                  |                                   |                                                                      |
| Actual Endpoint    | Irritant         | Irritant                          | Irritant                                                             |
| Predicted Endpoint | Irritant         | Irritant                          | Irritant                                                             |
| Distance           | 0.619            | 0.781                             | 0.792                                                                |
| Reference          | AJOPAA 31;837;48 | BJOPAL 53;819;69                  | 28ZPAK-;123;72                                                       |

## Model Applicability

Unknown features are fingerprint features in the query molecule, but not found or appearing too infrequently in the training set.

- All properties and OPS components are within expected ranges.

## Feature Contribution

### Top features for positive contribution

| Fingerprint | Bit/Smiles | Feature Structure                  | Score | Irritant in training set |
|-------------|------------|------------------------------------|-------|--------------------------|
| FCFP_12     | 1175665944 | <br>[*].[cH]:[c](NC(=O)C):[cH]:[*] | 0.198 | 14 out of 14             |

|                                               |                   |                                                                                                                                |              |                                 |
|-----------------------------------------------|-------------------|--------------------------------------------------------------------------------------------------------------------------------|--------------|---------------------------------|
| FCFP_12                                       | 675799546         | 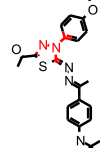<br>[*]=C1[*][*]=NN1[c](:<br>[*]):[*]       | 0.184        | 7 out of 7                      |
| FCFP_12                                       | -1944671191       | <br>[*]:[c](:[*])NC(=O)C                    | 0.184        | 7 out of 7                      |
| <b>Top Features for negative contribution</b> |                   |                                                                                                                                |              |                                 |
| <b>Fingerprint</b>                            | <b>Bit/Smiles</b> | <b>Feature Structure</b>                                                                                                       | <b>Score</b> | <b>Irritant in training set</b> |
| FCFP_12                                       | 565998553         | <br>[*]C(=[*])C1=N[*][*]S<br>1              | -0.0662      | 198 out of 262                  |
| FCFP_12                                       | 203677720         | <br>[*]C(=[*])[c](:[cH]:[*]<br>*):[cH]:[*] | 0            | 319 out of 382                  |
| FCFP_12                                       | 136597326         | <br>[*]C(=[*])C                           | 0            | 612 out of 753                  |

18a

TOPKAT\_Ocular\_Irritancy\_None\_vs\_Irritant

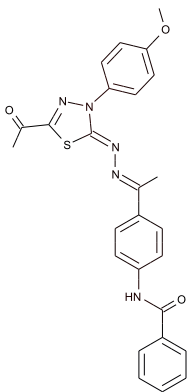C<sub>26</sub>H<sub>23</sub>N<sub>5</sub>O<sub>3</sub>S

Molecular Weight: 485.55751

ALogP: 4.728

Rotatable Bonds: 7

Acceptors: 8

Donors: 1

## Model Prediction

Prediction: Irritant

Probability: 1

Enrichment: 1.18

Bayesian Score: 1.48

Mahalanobis Distance: 8.25

Mahalanobis Distance p-value: 0.861

Prediction: Positive if the Bayesian score is above the estimated best cutoff value from minimizing the false positive and false negative rate.

Probability: The estimated probability that the sample is in the positive category. This assumes that the Bayesian score follows a normal distribution and is different from the prediction using a cutoff.

Enrichment: An estimate of enrichment, that is, the increased likelihood (versus random) of this sample being in the category.

Bayesian Score: The standard Laplacian-modified Bayesian score.

Mahalanobis Distance: The Mahalanobis distance (MD) is the distance to the center of the training data. The larger the MD, the less trustworthy the prediction.

Mahalanobis Distance p-value: The p-value gives the fraction of training data with an MD greater than or equal to the one for the given sample, assuming normally distributed data. The smaller the p-value, the less trustworthy the prediction. For highly non-normal X properties (e.g., fingerprints), the MD p-value is wildly inaccurate.

## Structural Similar Compounds

| Name               | COLCHICINE       | ANTHRAQUINONE; 1;1'-IMINODI- | Benzoic acid; p-(N-butyl-2-(butylamino)acetamido)-; butyl ester; |
|--------------------|------------------|------------------------------|------------------------------------------------------------------|
| Structure          |                  |                              |                                                                  |
| Actual Endpoint    | Irritant         | Irritant                     | Irritant                                                         |
| Predicted Endpoint | Irritant         | Irritant                     | Non-Irritant                                                     |
| Distance           | 0.753            | 0.779                        | 0.817                                                            |
| Reference          | AJOPAA 31;837;48 | 28ZPAK-;125;72               | Arzneimittel-Forschung 8;609;58                                  |

## Model Applicability

Unknown features are fingerprint features in the query molecule, but not found or appearing too infrequently in the training set.

- All properties and OPS components are within expected ranges.

## Feature Contribution

### Top features for positive contribution

| Fingerprint | Bit/Smiles | Feature Structure                                 | Score | Irritant in training set |
|-------------|------------|---------------------------------------------------|-------|--------------------------|
| FCFP_12     | 675799546  | <br><chem>[*]=C1[*](*)=NN1[C]([*]):[*]:[*]</chem> | 0.184 | 7 out of 7               |

|                                               |                   |                                                                                                                                                               |              |                                 |
|-----------------------------------------------|-------------------|---------------------------------------------------------------------------------------------------------------------------------------------------------------|--------------|---------------------------------|
| FCFP_12                                       | -319371573        | 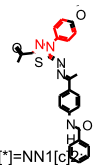<br><chem>[*]=C1[*][*]=NN1(c2cc3ccccc3cc2)[cH]:[cH]:[*]:[cH]:[cH]:2</chem> | 0.18         | 6 out of 6                      |
| FCFP_12                                       | 580960234         | <br><chem>[*]C(=NN=[*])[*]</chem>                                          | 0.18         | 6 out of 6                      |
| <b>Top Features for negative contribution</b> |                   |                                                                                                                                                               |              |                                 |
| <b>Fingerprint</b>                            | <b>Bit/Smiles</b> | <b>Feature Structure</b>                                                                                                                                      | <b>Score</b> | <b>Irritant in training set</b> |
| FCFP_12                                       | -1698724694       | <br><chem>[*]C(=[*])[c]1:[cH]:[cH]:[cH]:[cH]:[cH]:1</chem>                 | -0.0964      | 107 out of 146                  |
| FCFP_12                                       | 565998553         | <br><chem>[*]C(=[*])C1=N[*][*]S1</chem>                                   | -0.0662      | 198 out of 262                  |
| FCFP_12                                       | -453677277        | <br><chem>[*]C(=[*])[c]1:[cH]:[cH]:[cH]:[cH]:[cH]:1</chem>               | 0            | 264 out of 323                  |

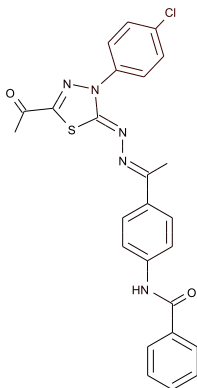

C<sub>25</sub>H<sub>20</sub>ClN<sub>5</sub>O<sub>2</sub>S

Molecular Weight: 489.97659

ALogP: 5.409

Rotatable Bonds: 6

Acceptors: 7

Donors: 1

## Model Prediction

**Prediction: Irritant**

Probability: 1

Enrichment: 1.18

Bayesian Score: 2.09

Mahalanobis Distance: 7.96

Mahalanobis Distance p-value: 0.933

Prediction: Positive if the Bayesian score is above the estimated best cutoff value from minimizing the false positive and false negative rate.

Probability: The estimated probability that the sample is in the positive category. This assumes that the Bayesian score follows a normal distribution and is different from the prediction using a cutoff.

Enrichment: An estimate of enrichment, that is, the increased likelihood (versus random) of this sample being in the category.

Bayesian Score: The standard Laplacian-modified Bayesian score.

Mahalanobis Distance: The Mahalanobis distance (MD) is the distance to the center of the training data. The larger the MD, the less trustworthy the prediction.

Mahalanobis Distance p-value: The p-value gives the fraction of training data with an MD greater than or equal to the one for the given sample, assuming normally distributed data. The smaller the p-value, the less trustworthy the prediction. For highly non-normal X properties (e.g., fingerprints), the MD p-value is wildly inaccurate.

## Structural Similar Compounds

| Name               | ANTHRAQUINONE; 1;1'-IMINODI- | 1-BENZOYLAMINO-4-METHOXY-5-CHLORANTHRAQUINONE | BENZANILIDE;2';2'''-DITHIOBIS- |
|--------------------|------------------------------|-----------------------------------------------|--------------------------------|
| Structure          |                              |                                               |                                |
| Actual Endpoint    | Irritant                     | Irritant                                      | Non-Irritant                   |
| Predicted Endpoint | Irritant                     | Irritant                                      | Non-Irritant                   |
| Distance           | 0.690                        | 0.753                                         | 0.773                          |
| Reference          | 28ZPAK-;125;72               | 28ZPAK-;90;72                                 | 28ZPAK-;173;72                 |

## Model Applicability

Unknown features are fingerprint features in the query molecule, but not found or appearing too infrequently in the training set.

1. All properties and OPS components are within expected ranges.

## Feature Contribution

### Top features for positive contribution

| Fingerprint | Bit/Smiles | Feature Structure                                 | Score | Irritant in training set |
|-------------|------------|---------------------------------------------------|-------|--------------------------|
| FCFP_12     | 1508180856 | <br>[*][c]1:[cH]:[cH]:[c]:[c]<br>(Cl):[cH]:[cH]:1 | 0.2   | 17 out of 17             |



|                                               |                   |                                                                                                                                                                    |              |                                 |
|-----------------------------------------------|-------------------|--------------------------------------------------------------------------------------------------------------------------------------------------------------------|--------------|---------------------------------|
| FCFP_12                                       | 567484887         | 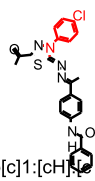<br><chem>[*]N([*])[c]1:[cH]:[cH]:[cH]:[cH]:[c](Cl):[cH]:[cH]:1</chem>          | 0.192        | 10 out of 10                    |
| FCFP_12                                       | 675799546         | <br><chem>[*]=C1[*][*]=NN1[c](:[*]):[*]</chem>                                  | 0.184        | 7 out of 7                      |
| <b>Top Features for negative contribution</b> |                   |                                                                                                                                                                    |              |                                 |
| <b>Fingerprint</b>                            | <b>Bit/Smiles</b> | <b>Feature Structure</b>                                                                                                                                           | <b>Score</b> | <b>Irritant in training set</b> |
| FCFP_12                                       | -1698724694       | <br><chem>[*]C(=[*])[c]1:[cH]:[cH]:[cH]:[cH]:[cH]:[cH]:[cH]:1</chem>            | -0.0964      | 107 out of 146                  |
| FCFP_12                                       | 565998553         | <br><chem>[*]C(=[*])C1=N[*][*]S1</chem>                                        | -0.0662      | 198 out of 262                  |
| FCFP_12                                       | 384221478         | <br><chem>[*]:[c](:[*])NC(=O)[c]1:[cH]:[cH]:[cH]:[cH]:[cH]:[cH]:[cH]:1</chem> | 0            | 4 out of 5                      |

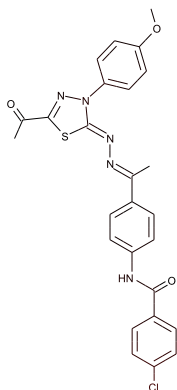

$C_{26}H_{22}ClN_5O_3S$

Molecular Weight: 520.00258

ALogP: 5.392

Rotatable Bonds: 7

Acceptors: 8

Donors: 1

## Model Prediction

**Prediction: Irritant**

Probability: 1

Enrichment: 1.18

Bayesian Score: 2.43

Mahalanobis Distance: 8.46

Mahalanobis Distance p-value: 0.781

Prediction: Positive if the Bayesian score is above the estimated best cutoff value from minimizing the false positive and false negative rate.

Probability: The estimated probability that the sample is in the positive category. This assumes that the Bayesian score follows a normal distribution and is different from the prediction using a cutoff.

Enrichment: An estimate of enrichment, that is, the increased likelihood (versus random) of this sample being in the category.

Bayesian Score: The standard Laplacian-modified Bayesian score.

Mahalanobis Distance: The Mahalanobis distance (MD) is the distance to the center of the training data. The larger the MD, the less trustworthy the prediction.

Mahalanobis Distance p-value: The p-value gives the fraction of training data with an MD greater than or equal to the one for the given sample, assuming normally distributed data. The smaller the p-value, the less trustworthy the prediction. For highly non-normal X properties (e.g., fingerprints), the MD p-value is wildly inaccurate.

## Structural Similar Compounds

| Name               | ANTHRAQUINONE; 1;1'-IMINODI- | COLCHICINE       | Benzoic acid; p-(N-butyl-2-(butylamino)acetamido)-; butyl ester; |
|--------------------|------------------------------|------------------|------------------------------------------------------------------|
| Structure          |                              |                  |                                                                  |
| Actual Endpoint    | Irritant                     | Irritant         | Irritant                                                         |
| Predicted Endpoint | Irritant                     | Irritant         | Non-Irritant                                                     |
| Distance           | 0.803                        | 0.829            | 0.856                                                            |
| Reference          | 28ZPAK-;125;72               | AJOPAA 31;837;48 | Arzneimittel-Forschung 8;609;58                                  |

## Model Applicability

Unknown features are fingerprint features in the query molecule, but not found or appearing too infrequently in the training set.

- All properties and OPS components are within expected ranges.

## Feature Contribution

### Top features for positive contribution

| Fingerprint | Bit/Smiles  | Feature Structure                              | Score | Irritant in training set |
|-------------|-------------|------------------------------------------------|-------|--------------------------|
| FCFP_12     | -1508180856 | <br>[*][c]1:[cH]:[cH]:[c]:<br>(Cl):[cH]:[cH]:1 | 0.2   | 17 out of 17             |

|                                               |                   |                                                                                                                                            |              |                                 |
|-----------------------------------------------|-------------------|--------------------------------------------------------------------------------------------------------------------------------------------|--------------|---------------------------------|
| FCFP_12                                       | 675799546         | 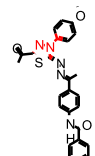<br>[*]=C1[*][*]=NN1c(:<br>[*]):[*]                     | 0.184        | 7 out of 7                      |
| FCFP_12                                       | -149636017        | <br>[*]C(=[*])[c]1:[cH]1<br>cH]:[c](Cl):[cH]:[cH<br>]:1 | 0.184        | 7 out of 7                      |
| <b>Top Features for negative contribution</b> |                   |                                                                                                                                            |              |                                 |
| <b>Fingerprint</b>                            | <b>Bit/Smiles</b> | <b>Feature Structure</b>                                                                                                                   | <b>Score</b> | <b>Irritant in training set</b> |
| FCFP_12                                       | 565998553         | <br>[*]C(=[*])C1=N[*][*]S<br>1                          | -0.0662      | 198 out of 262                  |
| FCFP_12                                       | 1                 | <br>[*]=O                                              | 0            | 872 out of 1051                 |
| FCFP_12                                       | 0                 | <br>[*]C(=[*])[*]                                     | 0            | 1184 out of 1397                |



|                                               |                   |                                                                                                                                                              |              |                                 |
|-----------------------------------------------|-------------------|--------------------------------------------------------------------------------------------------------------------------------------------------------------|--------------|---------------------------------|
| FCFP_12                                       | 567484887         | 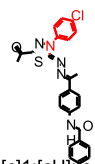<br><chem>[*]N([*])[c]1:[cH]a[<br/>H]:[c](Cl):[cH]:[cH]<br/>:1</chem>     | 0.192        | 10 out of 10                    |
| FCFP_12                                       | 675799546         | <br><chem>[*]=C1[*][*]=NN1[<br/>[*]):-[*]</chem>                          | 0.184        | 7 out of 7                      |
| <b>Top Features for negative contribution</b> |                   |                                                                                                                                                              |              |                                 |
| <b>Fingerprint</b>                            | <b>Bit/Smiles</b> | <b>Feature Structure</b>                                                                                                                                     | <b>Score</b> | <b>Irritant in training set</b> |
| FCFP_12                                       | 565998553         | <br><chem>[*]C(=[*])C1=N[*][*]<br/>S<br/>1</chem>                         | -0.0662      | 198 out of 262                  |
| FCFP_12                                       | -453677277        | <br><chem>[*]C(=[*])[c]1:[cH]a[<br/>*]:[c]([*]):[cH]:[cH]<br/>]:1</chem> | 0            | 264 out of 323                  |
| FCFP_12                                       | -581162801        | <br><chem>[*]N=C(/C)[c]1:[cH]<br/>:[cH]:[*]:[cH]:[cH]:<br/>1</chem>     | 0            | 7 out of 9                      |

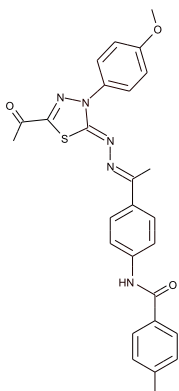

$C_{27}H_{25}N_5O_3S$

Molecular Weight: 499.58409

ALogP: 5.214

Rotatable Bonds: 7

Acceptors: 8

Donors: 1

## Model Prediction

**Prediction: Irritant**

Probability: 1

Enrichment: 1.18

Bayesian Score: 1.54

Mahalanobis Distance: 8.36

Mahalanobis Distance p-value: 0.823

Prediction: Positive if the Bayesian score is above the estimated best cutoff value from minimizing the false positive and false negative rate.

Probability: The estimated probability that the sample is in the positive category. This assumes that the Bayesian score follows a normal distribution and is different from the prediction using a cutoff.

Enrichment: An estimate of enrichment, that is, the increased likelihood (versus random) of this sample being in the category.

Bayesian Score: The standard Laplacian-modified Bayesian score.

Mahalanobis Distance: The Mahalanobis distance (MD) is the distance to the center of the training data. The larger the MD, the less trustworthy the prediction.

Mahalanobis Distance p-value: The p-value gives the fraction of training data with an MD greater than or equal to the one for the given sample, assuming normally distributed data. The smaller the p-value, the less trustworthy the prediction. For highly non-normal X properties (e.g., fingerprints), the MD p-value is wildly inaccurate.

## Structural Similar Compounds

| Name               | ANTHRAQUINONE; 1;1'-IMINODI- | COLCHICINE       | Benzoic acid; p-(N-butyl-2-(butylamino)acetamido)-; butyl ester; |
|--------------------|------------------------------|------------------|------------------------------------------------------------------|
| Structure          |                              |                  |                                                                  |
| Actual Endpoint    | Irritant                     | Irritant         | Irritant                                                         |
| Predicted Endpoint | Irritant                     | Irritant         | Non-Irritant                                                     |
| Distance           | 0.789                        | 0.797            | 0.831                                                            |
| Reference          | 28ZPAK-;125;72               | AJOPAA 31;837;48 | Arzneimittel-Forschung 8;609;58                                  |

## Model Applicability

Unknown features are fingerprint features in the query molecule, but not found or appearing too infrequently in the training set.

- All properties and OPS components are within expected ranges.

## Feature Contribution

### Top features for positive contribution

| Fingerprint | Bit/Smiles | Feature Structure                                      | Score | Irritant in training set |
|-------------|------------|--------------------------------------------------------|-------|--------------------------|
| FCFP_12     | 675799546  | <br><chem>[*]=C1[*][*]=NN1[*]([*])([*]):[*]:[*]</chem> | 0.184 | 7 out of 7               |

|                                               |                   |                                                                                                                                        |              |                                 |
|-----------------------------------------------|-------------------|----------------------------------------------------------------------------------------------------------------------------------------|--------------|---------------------------------|
| FCFP_12                                       | -319371573        | 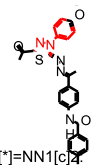<br>[*]=C1[*][*]=NN1(c1c2c(c1):[cH]:[*]:[cH]:[cH]:2 | 0.18         | 6 out of 6                      |
| FCFP_12                                       | 580960234         | <br>[*]C(=NN=[*])[*]                                | 0.18         | 6 out of 6                      |
| <b>Top Features for negative contribution</b> |                   |                                                                                                                                        |              |                                 |
| <b>Fingerprint</b>                            | <b>Bit/Smiles</b> | <b>Feature Structure</b>                                                                                                               | <b>Score</b> | <b>Irritant in training set</b> |
| FCFP_12                                       | 565998553         | <br>[*]C(=[*])C1=N[*][*]S1                          | -0.0662      | 198 out of 262                  |
| FCFP_12                                       | 0                 | <br>[*]C(=[*])[*]                                  | 0            | 1184 out of 1397                |
| FCFP_12                                       | -581162801        | <br>[*]N=C(/C)[c]1:[cH]:[cH]:[*]:[cH]:[cH]:1      | 0            | 7 out of 9                      |

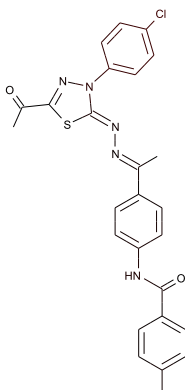

$C_{26}H_{22}ClN_5O_2S$

Molecular Weight: 504.00318

ALogP: 5.895

Rotatable Bonds: 6

Acceptors: 7

Donors: 1

## Model Prediction

**Prediction: Irritant**

Probability: 1

Enrichment: 1.18

Bayesian Score: 2.52

Mahalanobis Distance: 8.08

Mahalanobis Distance p-value: 0.908

Prediction: Positive if the Bayesian score is above the estimated best cutoff value from minimizing the false positive and false negative rate.

Probability: The estimated probability that the sample is in the positive category. This assumes that the Bayesian score follows a normal distribution and is different from the prediction using a cutoff.

Enrichment: An estimate of enrichment, that is, the increased likelihood (versus random) of this sample being in the category.

Bayesian Score: The standard Laplacian-modified Bayesian score.

Mahalanobis Distance: The Mahalanobis distance (MD) is the distance to the center of the training data. The larger the MD, the less trustworthy the prediction.

Mahalanobis Distance p-value: The p-value gives the fraction of training data with an MD greater than or equal to the one for the given sample, assuming normally distributed data. The smaller the p-value, the less trustworthy the prediction. For highly non-normal X properties (e.g., fingerprints), the MD p-value is wildly inaccurate.

## Structural Similar Compounds

| Name               | ANTHRAQUINONE; 1;1'-IMINODI- | 2-(1'-ANTHRAQUINONYL)-AMINOBENZANTHRONE | BENZANILIDE;2';2'''-DITHIOBIS- |
|--------------------|------------------------------|-----------------------------------------|--------------------------------|
| Structure          |                              |                                         |                                |
| Actual Endpoint    | Irritant                     | Irritant                                | Non-Irritant                   |
| Predicted Endpoint | Irritant                     | Irritant                                | Non-Irritant                   |
| Distance           | 0.712                        | 0.793                                   | 0.796                          |
| Reference          | 28ZPAK-;125;72               | 28ZPAK-;126;72                          | 28ZPAK-;173;72                 |

## Model Applicability

Unknown features are fingerprint features in the query molecule, but not found or appearing too infrequently in the training set.

1. All properties and OPS components are within expected ranges.

## Feature Contribution

### Top features for positive contribution

| Fingerprint | Bit/Smiles  | Feature Structure                             | Score | Irritant in training set |
|-------------|-------------|-----------------------------------------------|-------|--------------------------|
| FCFP_12     | -1508180856 | <br>[*][c]1:[cH]:[cH]:[c]<br>(Cl):[cH]:[cH]:1 | 0.2   | 17 out of 17             |



|                                               |                   |                                                                                                                                              |              |                                 |
|-----------------------------------------------|-------------------|----------------------------------------------------------------------------------------------------------------------------------------------|--------------|---------------------------------|
| FCFP_12                                       | 567484887         | 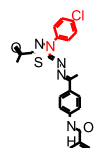<br>[*]N([*])[c]1:[cH]:[c]<br>H):[c](Cl):[cH]:[cH]<br>:1  | 0.192        | 10 out of 10                    |
| FCFP_12                                       | 675799546         | <br>[*]=C1[*][*]=NN1[c](<br>[*]):[*]                      | 0.184        | 7 out of 7                      |
| <b>Top Features for negative contribution</b> |                   |                                                                                                                                              |              |                                 |
| <b>Fingerprint</b>                            | <b>Bit/Smiles</b> | <b>Feature Structure</b>                                                                                                                     | <b>Score</b> | <b>Irritant in training set</b> |
| FCFP_12                                       | 565998553         | <br>[*]C(=[*])C1=N[*][*]S<br>1                            | -0.0662      | 198 out of 262                  |
| FCFP_12                                       | -1925475824       | <br>[*]:[cH]:[c](:[cH]:[c]<br>))C(=O)N[c](:[*]):[*]<br>1 | 0            | 4 out of 5                      |
| FCFP_12                                       | -581879738        | <br>[*]NC(=O)[c]1:[cH]:[c]<br>H):[*][cH]:[cH]:1         | 0            | 4 out of 5                      |

# Sorafenib

# TOPKAT\_Ocular\_Irritancy\_None\_vs\_Irritant

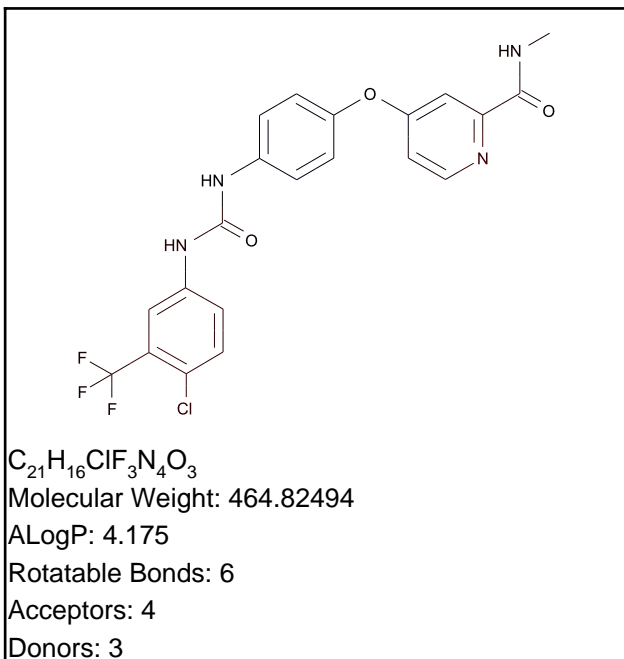

## Model Prediction

**Prediction: Irritant**

Probability: 1

Enrichment: 1.18

Bayesian Score: 3.04

Mahalanobis Distance: 6.28

Mahalanobis Distance p-value: 1

Prediction: Positive if the Bayesian score is above the estimated best cutoff value from minimizing the false positive and false negative rate.

Probability: The estimated probability that the sample is in the positive category. This assumes that the Bayesian score follows a normal distribution and is different from the prediction using a cutoff.

Enrichment: An estimate of enrichment, that is, the increased likelihood (versus random) of this sample being in the category.

Bayesian Score: The standard Laplacian-modified Bayesian score.

Mahalanobis Distance: The Mahalanobis distance (MD) is the distance to the center of the training data. The larger the MD, the less trustworthy the prediction.

Mahalanobis Distance p-value: The p-value gives the fraction of training data with an MD greater than or equal to the one for the given sample, assuming normally distributed data. The smaller the p-value, the less trustworthy the prediction. For highly non-normal X properties (e.g., fingerprints), the MD p-value is wildly inaccurate.

## Structural Similar Compounds

| Name               | BENZANILIDE;2';2'''-DITHIOBIS-                                                      | 4;4'-DIAMINO-1;1'-DIANTHRIMIDE                                                      | 5-NORBORNENE-2;3-DICARBOXYLIC ACID; 1;4;5;6;7;7'-HEXACHLORO-                        |
|--------------------|-------------------------------------------------------------------------------------|-------------------------------------------------------------------------------------|-------------------------------------------------------------------------------------|
| Structure          | 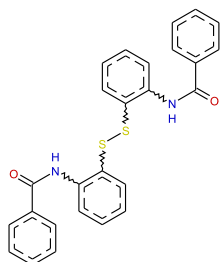 |  |  |
| Actual Endpoint    | Non-Irritant                                                                        | Irritant                                                                            | Irritant                                                                            |
| Predicted Endpoint | Non-Irritant                                                                        | Irritant                                                                            | Irritant                                                                            |
| Distance           | 0.743                                                                               | 0.791                                                                               | 0.801                                                                               |
| Reference          | 28ZPAK-;173;72                                                                      | 28ZPAK-;125;72                                                                      | 28ZPAK-;92;72                                                                       |

## Model Applicability

Unknown features are fingerprint features in the query molecule, but not found or appearing too infrequently in the training set.

- All properties and OPS components are within expected ranges.

## Feature Contribution

### Top features for positive contribution

| Fingerprint | Bit/Smiles | Feature Structure                                                                                                | Score | Irritant in training set |
|-------------|------------|------------------------------------------------------------------------------------------------------------------|-------|--------------------------|
| FCFP_12     | 1747237384 | 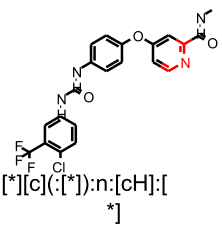<br>[*][c](:[*]):n:[cH]:[*] | 0.208 | 44 out of 44             |

|                                               |                   |                                                                                                                                                                            |              |                                 |
|-----------------------------------------------|-------------------|----------------------------------------------------------------------------------------------------------------------------------------------------------------------------|--------------|---------------------------------|
| FCFP_12                                       | -124655670        | 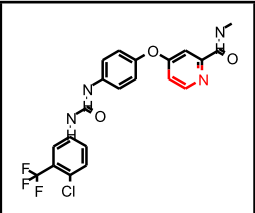<br>[*]:[cH]:[cH]:n:[*]                                                                  | 0.2          | 16 out of 16                    |
| FCFP_12                                       | -1539132615       | <br>[*]C(=[*])[c](-[cH]:[*]):n:[*]                                                      | 0.197        | 13 out of 13                    |
| <b>Top Features for negative contribution</b> |                   |                                                                                                                                                                            |              |                                 |
| <b>Fingerprint</b>                            | <b>Bit/Smiles</b> | <b>Feature Structure</b>                                                                                                                                                   | <b>Score</b> | <b>Irritant in training set</b> |
| FCFP_12                                       | -747629521        | <br>[*]N([c]F:[cH]:[cH]:[c])<br>[O][c](-[*]):[*]:[c]<br>H]:[cH]:1                       | -0.268       | 1 out of 2                      |
| FCFP_12                                       | 702861189         | <br>[*]N([c]1:[cH]:[cH]:[c])<br>[O][c]2:[cH]:[cH]:[*]<br>]:[c]([*]):[cH]:2:[cH]:[cH]:1 | -0.268       | 1 out of 2                      |
| FCFP_12                                       | -773983804        | <br>[*]N([c]1:[cH]:[*]:[c])<br>([*]):[cH]:[cH]:1                                      | 0            | 102 out of 121                  |

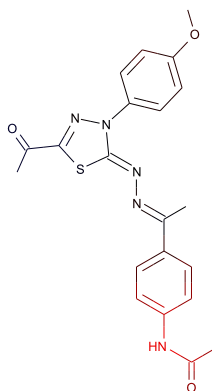

$C_{21}H_{21}N_5O_3S$

Molecular Weight: 423.48813

ALogP: 3.064

Rotatable Bonds: 6

Acceptors: 8

Donors: 1

## Model Prediction

**Prediction: Carcinogen**

Probability: 0.404

Enrichment: 1.26

Bayesian Score: 4.24

Mahalanobis Distance: 11.1

Mahalanobis Distance p-value: 0.0488

Prediction: Positive if the Bayesian score is above the estimated best cutoff value from minimizing the false positive and false negative rate.

Probability: The estimated probability that the sample is in the positive category. This assumes that the Bayesian score follows a normal distribution and is different from the prediction using a cutoff.

Enrichment: An estimate of enrichment, that is, the increased likelihood (versus random) of this sample being in the category.

Bayesian Score: The standard Laplacian-modified Bayesian score.

Mahalanobis Distance: The Mahalanobis distance (MD) is the distance to the center of the training data. The larger the MD, the less trustworthy the prediction.

Mahalanobis Distance p-value: The p-value gives the fraction of training data with an MD greater than or equal to the one for the given sample, assuming normally distributed data. The smaller the p-value, the less trustworthy the prediction. For highly non-normal X properties (e.g., fingerprints), the MD p-value is wildly inaccurate.

## Structural Similar Compounds

| Name               | Nisoldipine                                                         | Isradipine                                                          | Doxazosin                                                           |
|--------------------|---------------------------------------------------------------------|---------------------------------------------------------------------|---------------------------------------------------------------------|
| Structure          |                                                                     |                                                                     |                                                                     |
| Actual Endpoint    | Non-Carcinogen                                                      | Non-Carcinogen                                                      | Non-Carcinogen                                                      |
| Predicted Endpoint | Non-Carcinogen                                                      | Non-Carcinogen                                                      | Non-Carcinogen                                                      |
| Distance           | 0.594                                                               | 0.618                                                               | 0.644                                                               |
| Reference          | US FDA (Centre for Drug Eval.& Res./Off. Testing & Res.) Sept. 1997 | US FDA (Centre for Drug Eval.& Res./Off. Testing & Res.) Sept. 1997 | US FDA (Centre for Drug Eval.& Res./Off. Testing & Res.) Sept. 1997 |

## Model Applicability

Unknown features are fingerprint features in the query molecule, but not found or appearing too infrequently in the training set.

1. All properties and OPS components are within expected ranges.
2. Unknown ECFP\_2 feature: 128986386: [\*]N=C(/C)\[c](:[\*]):[\*]
3. Unknown ECFP\_2 feature: 562081661: [\*]C(=NN=[\*])[\*]
4. Unknown ECFP\_2 feature: -819426257: [\*]C(=NN=[\*])[\*]
5. Unknown ECFP\_2 feature: 189949281: [\*]N=C\1/S[\*]=[\*]N1[\*]
6. Unknown ECFP\_2 feature: -934225701: [\*]C(=[\*])C1=N[\*][\*]S1
7. Unknown ECFP\_2 feature: -1110911409: [\*]=C1[\*][\*]=NN1[c](:[\*]):[\*]

## Feature Contribution

### Top features for positive contribution

| Fingerprint | Bit/Smiles | Feature Structure | Score | Carcinogen in training set |
|-------------|------------|-------------------|-------|----------------------------|
|             |            |                   |       |                            |

|                                               |                   |                                                                                                                                                                                              |              |                                   |
|-----------------------------------------------|-------------------|----------------------------------------------------------------------------------------------------------------------------------------------------------------------------------------------|--------------|-----------------------------------|
| ECFP_12                                       | 1776488           | 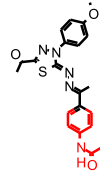<br><chem>CC(=O)N(c1:[cH]:[cH]:[*]:[cH]:[cH]:1):[cH]:[cH]:1</chem>                                        | 0.613        | 2 out of 2                        |
| ECFP_12                                       | -847011520        | <br><chem>[*][c]1:[cH]:[cH]:[c]:[cH]:[cH]:[cH]:[cH]:[cH]:1</chem><br><chem>(NC(=O)C):[cH]:[cH]:1</chem>   | 0.613        | 2 out of 2                        |
| ECFP_12                                       | -1923054811       | <br><chem>[*]:[c](:[*])NC(=O)C</chem>                                                                     | 0.575        | 3 out of 4                        |
| <b>Top Features for negative contribution</b> |                   |                                                                                                                                                                                              |              |                                   |
| <b>Fingerprint</b>                            | <b>Bit/Smiles</b> | <b>Feature Structure</b>                                                                                                                                                                     | <b>Score</b> | <b>Carcinogen in training set</b> |
| ECFP_12                                       | 129482634         | <br><chem>[*]C(=[*])C(=O)C</chem>                                                                        | -0.811       | 0 out of 4                        |
| ECFP_12                                       | -2137232509       | <br><chem>[*]N([*])[c]1:[cH]:[cH]:[*]:[cH]:[cH]:[cH]:[cH]:1</chem><br><chem>[c]([*]):[cH]:[cH]:1</chem> | -0.485       | 0 out of 2                        |

|         |           |                                                                                                    |        |             |
|---------|-----------|----------------------------------------------------------------------------------------------------|--------|-------------|
| ECFP_12 | 912478223 | 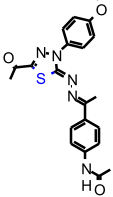 <p>[*]S[*]</p> | -0.318 | 2 out of 10 |
|---------|-----------|----------------------------------------------------------------------------------------------------|--------|-------------|

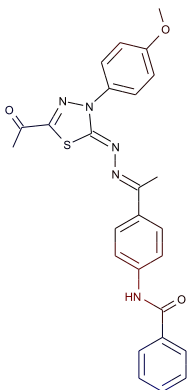

$C_{26}H_{23}N_5O_3S$

Molecular Weight: 485.55751

ALogP: 4.728

Rotatable Bonds: 7

Acceptors: 8

Donors: 1

## Model Prediction

**Prediction: Carcinogen**

Probability: 0.289

Enrichment: 0.897

Bayesian Score: -0.487

Mahalanobis Distance: 12.2

Mahalanobis Distance p-value: 0.00281

Prediction: Positive if the Bayesian score is above the estimated best cutoff value from minimizing the false positive and false negative rate.

Probability: The estimated probability that the sample is in the positive category. This assumes that the Bayesian score follows a normal distribution and is different from the prediction using a cutoff.

Enrichment: An estimate of enrichment, that is, the increased likelihood (versus random) of this sample being in the category. Bayesian Score: The standard Laplacian-modified Bayesian score.

Mahalanobis Distance: The Mahalanobis distance (MD) is the distance to the center of the training data. The larger the MD, the less trustworthy the prediction.

Mahalanobis Distance p-value: The p-value gives the fraction of training data with an MD greater than or equal to the one for the given sample, assuming normally distributed data. The smaller the p-value, the less trustworthy the prediction. For highly non-normal X properties (e.g., fingerprints), the MD p-value is wildly inaccurate.

## Structural Similar Compounds

| Name               | Nicardipine                                                         | Carbenicillin                                                       | Deserpidine                                                         |
|--------------------|---------------------------------------------------------------------|---------------------------------------------------------------------|---------------------------------------------------------------------|
| Structure          |                                                                     |                                                                     |                                                                     |
| Actual Endpoint    | Carcinogen                                                          | Non-Carcinogen                                                      | Carcinogen                                                          |
| Predicted Endpoint | Carcinogen                                                          | Non-Carcinogen                                                      | Carcinogen                                                          |
| Distance           | 0.667                                                               | 0.669                                                               | 0.707                                                               |
| Reference          | US FDA (Centre for Drug Eval.& Res./Off. Testing & Res.) Sept. 1997 | US FDA (Centre for Drug Eval.& Res./Off. Testing & Res.) Sept. 1997 | US FDA (Centre for Drug Eval.& Res./Off. Testing & Res.) Sept. 1997 |

## Model Applicability

Unknown features are fingerprint features in the query molecule, but not found or appearing too infrequently in the training set.

1. All properties and OPS components are within expected ranges.
2. Unknown ECFP\_2 feature: 128986386: [\*]N=C(/C)\[c](:[\*]):[\*]
3. Unknown ECFP\_2 feature: 562081661: [\*]C(=NN=[\*])[\*]
4. Unknown ECFP\_2 feature: -819426257: [\*]C(=NN=[\*])[\*]
5. Unknown ECFP\_2 feature: 189949281: [\*]N=C\1/S[\*]=[\*]N1[\*]
6. Unknown ECFP\_2 feature: -934225701: [\*]C(=[\*])C1=N[\*][\*]S1
7. Unknown ECFP\_2 feature: -1110911409: [\*]=C1[\*][\*]=NN1[c](:[\*]):[\*]

## Feature Contribution

### Top features for positive contribution

| Fingerprint | Bit/Smiles | Feature Structure | Score | Carcinogen in training set |
|-------------|------------|-------------------|-------|----------------------------|
|             |            |                   |       |                            |

|                                               |                   |                                                                                                                                |              |                                   |
|-----------------------------------------------|-------------------|--------------------------------------------------------------------------------------------------------------------------------|--------------|-----------------------------------|
| ECFP_12                                       | -223149939        | 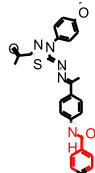<br>[*]NC(=O)[c]1:[cH]:[cH]:[*]:[cH]:[cH]:1 | 0.613        | 2 out of 2                        |
| ECFP_12                                       | -177077903        | <br>[*]N[c](:[cH]:[*]):[cH]:[*]             | 0.529        | 6 out of 10                       |
| ECFP_12                                       | -1236483485       | <br>[*]C(=[*])N[c](:[*]):[*]                | 0.46         | 9 out of 17                       |
| <b>Top Features for negative contribution</b> |                   |                                                                                                                                |              |                                   |
| <b>Fingerprint</b>                            | <b>Bit/Smiles</b> | <b>Feature Structure</b>                                                                                                       | <b>Score</b> | <b>Carcinogen in training set</b> |
| ECFP_12                                       | 129482634         | <br>[*]C(=[*])C(=O)C                       | -0.811       | 0 out of 4                        |
| ECFP_12                                       | 1571214559        | <br>[*]1:[cH]:[cH]:[cH]:[cH]:[cH]:[cH]:1  | -0.56        | 11 out of 64                      |



|         |            |                                                                                                                                                 |       |              |
|---------|------------|-------------------------------------------------------------------------------------------------------------------------------------------------|-------|--------------|
| ECFP_12 | -281505363 | 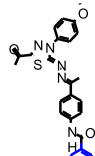<br><chem>*c1ccc(cc1)Nc2ccc(cc2)N3C=NC(S3)c4ccc(O)cc4</chem> | -0.56 | 11 out of 64 |
|---------|------------|-------------------------------------------------------------------------------------------------------------------------------------------------|-------|--------------|

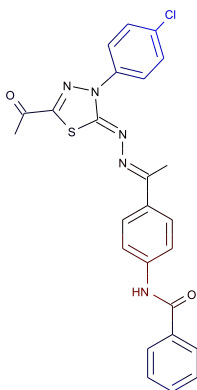

$C_{25}H_{20}ClN_5O_2S$

Molecular Weight: 489.97659

ALogP: 5.409

Rotatable Bonds: 6

Acceptors: 7

Donors: 1

## Model Prediction

Prediction: Non-Carcinogen

Probability: 0.218

Enrichment: 0.678

Bayesian Score: -5.27

Mahalanobis Distance: 11.5

Mahalanobis Distance p-value: 0.0198

Prediction: Positive if the Bayesian score is above the estimated best cutoff value from minimizing the false positive and false negative rate.

Probability: The estimated probability that the sample is in the positive category. This assumes that the Bayesian score follows a normal distribution and is different from the prediction using a cutoff.

Enrichment: An estimate of enrichment, that is, the increased likelihood (versus random) of this sample being in the category.

Bayesian Score: The standard Laplacian-modified Bayesian score.

Mahalanobis Distance: The Mahalanobis distance (MD) is the distance to the center of the training data. The larger the MD, the less trustworthy the prediction.

Mahalanobis Distance p-value: The p-value gives the fraction of training data with an MD greater than or equal to the one for the given sample, assuming normally distributed data. The smaller the p-value, the less trustworthy the prediction. For highly non-normal X properties (e.g., fingerprints), the MD p-value is wildly inaccurate.

## Structural Similar Compounds

| Name               | Emetine                                                             | Carbenicillin                                                       | Moricizine                                                          |
|--------------------|---------------------------------------------------------------------|---------------------------------------------------------------------|---------------------------------------------------------------------|
| Structure          |                                                                     |                                                                     |                                                                     |
| Actual Endpoint    | Non-Carcinogen                                                      | Non-Carcinogen                                                      | Carcinogen                                                          |
| Predicted Endpoint | Non-Carcinogen                                                      | Non-Carcinogen                                                      | Carcinogen                                                          |
| Distance           | 0.698                                                               | 0.710                                                               | 0.725                                                               |
| Reference          | US FDA (Centre for Drug Eval.& Res./Off. Testing & Res.) Sept. 1997 | US FDA (Centre for Drug Eval.& Res./Off. Testing & Res.) Sept. 1997 | US FDA (Centre for Drug Eval.& Res./Off. Testing & Res.) Sept. 1997 |

## Model Applicability

Unknown features are fingerprint features in the query molecule, but not found or appearing too infrequently in the training set.

1. All properties and OPS components are within expected ranges.
2. Unknown ECFP\_2 feature: 128986386: [\*]N=C(/C)\[c](:[\*]):[\*]
3. Unknown ECFP\_2 feature: 562081661: [\*]C(=NN=[\*])[\*]
4. Unknown ECFP\_2 feature: -819426257: [\*]C(=NN=[\*])[\*]
5. Unknown ECFP\_2 feature: 189949281: [\*]N=C\1/S[\*]=[\*]N1[\*]
6. Unknown ECFP\_2 feature: -934225701: [\*]C(=[\*])C1=N[\*][\*]S1
7. Unknown ECFP\_2 feature: -1110911409: [\*]=C1[\*][\*]=NN1[c](:[\*]):[\*]

## Feature Contribution

### Top features for positive contribution

| Fingerprint | Bit/Smiles | Feature Structure | Score | Carcinogen in training set |
|-------------|------------|-------------------|-------|----------------------------|
|             |            |                   |       |                            |

| ECFP_12                                | -223149939  | 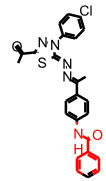<br><chem>[*]NC(=O)[c]1:[cH]:[cH]:[*]:[cH]:[cH]:1</chem> | 0.613  | 2 out of 2                 |
|----------------------------------------|-------------|---------------------------------------------------------------------------------------------------------------------------------------------|--------|----------------------------|
| ECFP_12                                | -177077903  | <br><chem>[*]N[c](:[cH]:[*]):[cH]:[*]</chem>             | 0.529  | 6 out of 10                |
| ECFP_12                                | -1236483485 | <br><chem>[*]C(=[*])N[c](:[*]):[*]</chem>                | 0.46   | 9 out of 17                |
| Top Features for negative contribution |             |                                                                                                                                             |        |                            |
| Fingerprint                            | Bit/Smiles  | Feature Structure                                                                                                                           | Score  | Carcinogen in training set |
| ECFP_12                                | 99947387    | <br><chem>[*]:[c](:[*])Cl</chem>                        | -0.817 | 8 out of 62                |
| ECFP_12                                | 1854732111  | <br><chem>[*][c]1:[*]:[cH]:[c](Cl):[cH]:[cH]:1</chem>  | -0.816 | 4 out of 33                |

|         |           |                                                                                                                      |        |            |
|---------|-----------|----------------------------------------------------------------------------------------------------------------------|--------|------------|
| ECFP_12 | 129482634 | 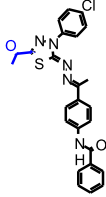<br><chem>[*]C(=[*])C(=O)C</chem> | -0.811 | 0 out of 4 |
|---------|-----------|----------------------------------------------------------------------------------------------------------------------|--------|------------|

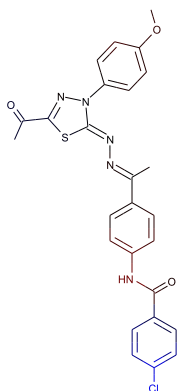

$C_{26}H_{22}ClN_5O_3S$

Molecular Weight: 520.00258

ALogP: 5.392

Rotatable Bonds: 7

Acceptors: 8

Donors: 1

## Model Prediction

Prediction: Non-Carcinogen

Probability: 0.25

Enrichment: 0.776

Bayesian Score: -2.79

Mahalanobis Distance: 11.9

Mahalanobis Distance p-value: 0.00555

Prediction: Positive if the Bayesian score is above the estimated best cutoff value from minimizing the false positive and false negative rate.

Probability: The estimated probability that the sample is in the positive category. This assumes that the Bayesian score follows a normal distribution and is different from the prediction using a cutoff.

Enrichment: An estimate of enrichment, that is, the increased likelihood (versus random) of this sample being in the category.

Bayesian Score: The standard Laplacian-modified Bayesian score.

Mahalanobis Distance: The Mahalanobis distance (MD) is the distance to the center of the training data. The larger the MD, the less trustworthy the prediction.

Mahalanobis Distance p-value: The p-value gives the fraction of training data with an MD greater than or equal to the one for the given sample, assuming normally distributed data. The smaller the p-value, the less trustworthy the prediction. For highly non-normal X properties (e.g., fingerprints), the MD p-value is wildly inaccurate.

## Structural Similar Compounds

| Name               | Deserpidine                                                         | Nicardipine                                                         | Carbenicillin                                                       |
|--------------------|---------------------------------------------------------------------|---------------------------------------------------------------------|---------------------------------------------------------------------|
| Structure          |                                                                     |                                                                     |                                                                     |
| Actual Endpoint    | Carcinogen                                                          | Carcinogen                                                          | Non-Carcinogen                                                      |
| Predicted Endpoint | Carcinogen                                                          | Carcinogen                                                          | Non-Carcinogen                                                      |
| Distance           | 0.653                                                               | 0.715                                                               | 0.724                                                               |
| Reference          | US FDA (Centre for Drug Eval.& Res./Off. Testing & Res.) Sept. 1997 | US FDA (Centre for Drug Eval.& Res./Off. Testing & Res.) Sept. 1997 | US FDA (Centre for Drug Eval.& Res./Off. Testing & Res.) Sept. 1997 |

## Model Applicability

Unknown features are fingerprint features in the query molecule, but not found or appearing too infrequently in the training set.

1. All properties and OPS components are within expected ranges.
2. Unknown ECFP\_2 feature: 128986386: [\*]N=C(/C)[c](:[\*]):[\*]
3. Unknown ECFP\_2 feature: 562081661: [\*]C(=NN=[\*])[\*]
4. Unknown ECFP\_2 feature: -819426257: [\*]C(=NN=[\*])[\*]
5. Unknown ECFP\_2 feature: 189949281: [\*]N=C\1/S[\*]=[\*]N1[\*]
6. Unknown ECFP\_2 feature: -934225701: [\*]C(=[\*])C1=N[\*][\*]S1
7. Unknown ECFP\_2 feature: -1110911409: [\*]=C1[\*][\*]=NN1[c](:[\*]):[\*]

## Feature Contribution

### Top features for positive contribution

| Fingerprint | Bit/Smiles | Feature Structure | Score | Carcinogen in training set |
|-------------|------------|-------------------|-------|----------------------------|
|             |            |                   |       |                            |

|                                               |                   |                                                                                                                                               |              |                                   |
|-----------------------------------------------|-------------------|-----------------------------------------------------------------------------------------------------------------------------------------------|--------------|-----------------------------------|
| ECFP_12                                       | -223149939        | 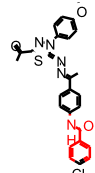<br>[*]NC(=O)[c]1:[cH]:[cH]:[*]:[cH]:[cH]:1                | 0.613        | 2 out of 2                        |
| ECFP_12                                       | -177077903        | <br>[*]N[c](:[cH]:[*]):[cH]:[*]                            | 0.529        | 6 out of 10                       |
| ECFP_12                                       | -1236483485       | <br>[*]C(=[*])N[c](:[*]):[*]                               | 0.46         | 9 out of 17                       |
| <b>Top Features for negative contribution</b> |                   |                                                                                                                                               |              |                                   |
| <b>Fingerprint</b>                            | <b>Bit/Smiles</b> | <b>Feature Structure</b>                                                                                                                      | <b>Score</b> | <b>Carcinogen in training set</b> |
| ECFP_12                                       | 99947387          | <br>[*]:[c](:[*])Cl                                       | -0.817       | 8 out of 62                       |
| ECFP_12                                       | 1854732111        | <br>[*][c]1:[*]:[cH]:[*]([c]([cH]:[cH]:1)Cl):[cH]:[cH]:1 | -0.816       | 4 out of 33                       |

|         |           |                                                                                                                                                                                                                                                                                                                                                                                                                                                                                                                                               |        |            |
|---------|-----------|-----------------------------------------------------------------------------------------------------------------------------------------------------------------------------------------------------------------------------------------------------------------------------------------------------------------------------------------------------------------------------------------------------------------------------------------------------------------------------------------------------------------------------------------------|--------|------------|
| ECFP_12 | 129482634 | 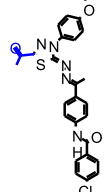 <p>The image shows a chemical structure of a thiazole derivative. It consists of a thiazole ring (a five-membered ring with two nitrogen atoms and one sulfur atom) attached to a phenyl ring. The phenyl ring is further substituted with a chlorine atom and a carbonyl group. The carbonyl group is connected to another phenyl ring, which is also substituted with a chlorine atom. The sulfur atom in the thiazole ring is highlighted in blue.</p> | -0.811 | 0 out of 4 |
|---------|-----------|-----------------------------------------------------------------------------------------------------------------------------------------------------------------------------------------------------------------------------------------------------------------------------------------------------------------------------------------------------------------------------------------------------------------------------------------------------------------------------------------------------------------------------------------------|--------|------------|

[\*]C(=[\*])C(=O)C

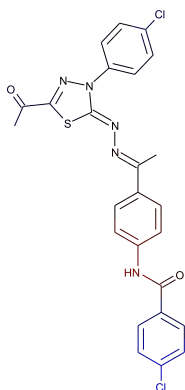

$C_{25}H_{19}Cl_2N_5O_2S$

Molecular Weight: 524.42166

ALogP: 6.073

Rotatable Bonds: 6

Acceptors: 7

Donors: 1

## Model Prediction

Prediction: Non-Carcinogen

Probability: 0.246

Enrichment: 0.764

Bayesian Score: -3.05

Mahalanobis Distance: 11.3

Mahalanobis Distance p-value: 0.0364

Prediction: Positive if the Bayesian score is above the estimated best cutoff value from minimizing the false positive and false negative rate.

Probability: The estimated probability that the sample is in the positive category. This assumes that the Bayesian score follows a normal distribution and is different from the prediction using a cutoff.

Enrichment: An estimate of enrichment, that is, the increased likelihood (versus random) of this sample being in the category.

Bayesian Score: The standard Laplacian-modified Bayesian score.

Mahalanobis Distance: The Mahalanobis distance (MD) is the distance to the center of the training data. The larger the MD, the less trustworthy the prediction.

Mahalanobis Distance p-value: The p-value gives the fraction of training data with an MD greater than or equal to the one for the given sample, assuming normally distributed data. The smaller the p-value, the less trustworthy the prediction. For highly non-normal X properties (e.g., fingerprints), the MD p-value is wildly inaccurate.

## Structural Similar Compounds

| Name               | Deserpidine                                                         | Emetine                                                             | Carbenicillin                                                       |
|--------------------|---------------------------------------------------------------------|---------------------------------------------------------------------|---------------------------------------------------------------------|
| Structure          |                                                                     |                                                                     |                                                                     |
| Actual Endpoint    | Carcinogen                                                          | Non-Carcinogen                                                      | Non-Carcinogen                                                      |
| Predicted Endpoint | Carcinogen                                                          | Non-Carcinogen                                                      | Non-Carcinogen                                                      |
| Distance           | 0.720                                                               | 0.723                                                               | 0.775                                                               |
| Reference          | US FDA (Centre for Drug Eval.& Res./Off. Testing & Res.) Sept. 1997 | US FDA (Centre for Drug Eval.& Res./Off. Testing & Res.) Sept. 1997 | US FDA (Centre for Drug Eval.& Res./Off. Testing & Res.) Sept. 1997 |

## Model Applicability

Unknown features are fingerprint features in the query molecule, but not found or appearing too infrequently in the training set.

1. All properties and OPS components are within expected ranges.
2. Unknown ECFP\_2 feature: 128986386: [\*]N=C(/C)\[c](:[\*]):[\*]
3. Unknown ECFP\_2 feature: 562081661: [\*]C(=NN=[\*])[\*]
4. Unknown ECFP\_2 feature: -819426257: [\*]C(=NN=[\*])[\*]
5. Unknown ECFP\_2 feature: 189949281: [\*]N=C\1/S[\*]=[\*]N1[\*]
6. Unknown ECFP\_2 feature: -934225701: [\*]C(=[\*])C1=N[\*][\*]S1
7. Unknown ECFP\_2 feature: -1110911409: [\*]=C1[\*][\*]=NN1[c](:[\*]):[\*]

## Feature Contribution

### Top features for positive contribution

| Fingerprint | Bit/Smiles | Feature Structure | Score | Carcinogen in training set |
|-------------|------------|-------------------|-------|----------------------------|
|             |            |                   |       |                            |



|                                               |                   |                                                                                                                                             |              |                                   |
|-----------------------------------------------|-------------------|---------------------------------------------------------------------------------------------------------------------------------------------|--------------|-----------------------------------|
| ECFP_12                                       | -223149939        | 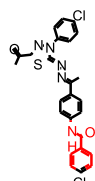<br><chem>[*]NC(=O)[c]1:[cH]:[cH]:[*]:[cH]:[cH]:1</chem> | 0.613        | 2 out of 2                        |
| ECFP_12                                       | -177077903        | <br><chem>[*]N[c](:[cH]:[*]):[cH]:[*]</chem>             | 0.529        | 6 out of 10                       |
| ECFP_12                                       | -1236483485       | <br><chem>[*]C(=[*])N[c](:[*]):[*]</chem>                | 0.46         | 9 out of 17                       |
| <b>Top Features for negative contribution</b> |                   |                                                                                                                                             |              |                                   |
| <b>Fingerprint</b>                            | <b>Bit/Smiles</b> | <b>Feature Structure</b>                                                                                                                    | <b>Score</b> | <b>Carcinogen in training set</b> |
| ECFP_12                                       | 99947387          | <br><chem>[*]:[c](:[*])Cl</chem>                        | -0.817       | 8 out of 62                       |
| ECFP_12                                       | 1854732111        | <br><chem>[*][c]1:[*]:[cH]:[*c](Cl):[cH]:[cH]:1</chem> | -0.816       | 4 out of 33                       |

|         |           |                                                                                                                      |        |            |
|---------|-----------|----------------------------------------------------------------------------------------------------------------------|--------|------------|
| ECFP_12 | 129482634 | 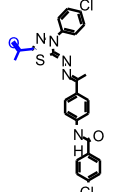<br><chem>[*]C(=[*])C(=O)C</chem> | -0.811 | 0 out of 4 |
|---------|-----------|----------------------------------------------------------------------------------------------------------------------|--------|------------|

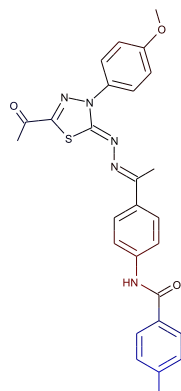

$C_{27}H_{25}N_5O_3S$

Molecular Weight: 499.58409

ALogP: 5.214

Rotatable Bonds: 7

Acceptors: 8

Donors: 1

## Model Prediction

Prediction: Non-Carcinogen

Probability: 0.262

Enrichment: 0.815

Bayesian Score: -1.98

Mahalanobis Distance: 11.7

Mahalanobis Distance p-value: 0.0111

Prediction: Positive if the Bayesian score is above the estimated best cutoff value from minimizing the false positive and false negative rate.

Probability: The estimated probability that the sample is in the positive category. This assumes that the Bayesian score follows a normal distribution and is different from the prediction using a cutoff.

Enrichment: An estimate of enrichment, that is, the increased likelihood (versus random) of this sample being in the category.

Bayesian Score: The standard Laplacian-modified Bayesian score.

Mahalanobis Distance: The Mahalanobis distance (MD) is the distance to the center of the training data. The larger the MD, the less trustworthy the prediction.

Mahalanobis Distance p-value: The p-value gives the fraction of training data with an MD greater than or equal to the one for the given sample, assuming normally distributed data. The smaller the p-value, the less trustworthy the prediction. For highly non-normal X properties (e.g., fingerprints), the MD p-value is wildly inaccurate.

## Structural Similar Compounds

| Name               | Deserpidine                                                         | Nicardipine                                                         | Carbenicillin                                                       |
|--------------------|---------------------------------------------------------------------|---------------------------------------------------------------------|---------------------------------------------------------------------|
| Structure          |                                                                     |                                                                     |                                                                     |
| Actual Endpoint    | Carcinogen                                                          | Carcinogen                                                          | Non-Carcinogen                                                      |
| Predicted Endpoint | Carcinogen                                                          | Carcinogen                                                          | Non-Carcinogen                                                      |
| Distance           | 0.678                                                               | 0.695                                                               | 0.709                                                               |
| Reference          | US FDA (Centre for Drug Eval.& Res./Off. Testing & Res.) Sept. 1997 | US FDA (Centre for Drug Eval.& Res./Off. Testing & Res.) Sept. 1997 | US FDA (Centre for Drug Eval.& Res./Off. Testing & Res.) Sept. 1997 |

## Model Applicability

Unknown features are fingerprint features in the query molecule, but not found or appearing too infrequently in the training set.

1. All properties and OPS components are within expected ranges.
2. Unknown ECFP\_2 feature: 128986386: [\*]N=C(/C)[c](:[\*]):[\*]
3. Unknown ECFP\_2 feature: 562081661: [\*]C(=NN=[\*])[\*]
4. Unknown ECFP\_2 feature: -819426257: [\*]C(=NN=[\*])[\*]
5. Unknown ECFP\_2 feature: 189949281: [\*]N=C\1/S[\*]=[\*]N1[\*]
6. Unknown ECFP\_2 feature: -934225701: [\*]C(=[\*])C1=N[\*][\*]S1
7. Unknown ECFP\_2 feature: -1110911409: [\*]=C1[\*][\*]=NN1[c](:[\*]):[\*]

## Feature Contribution

### Top features for positive contribution

| Fingerprint | Bit/Smiles | Feature Structure | Score | Carcinogen in training set |
|-------------|------------|-------------------|-------|----------------------------|
|             |            |                   |       |                            |

|                                               |                   |                                                                                                                                |              |                                   |
|-----------------------------------------------|-------------------|--------------------------------------------------------------------------------------------------------------------------------|--------------|-----------------------------------|
| ECFP_12                                       | -223149939        | 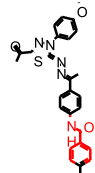<br>[*]NC(=O)[c]1:[cH]:[cH]:[*]:[cH]:[cH]:1 | 0.613        | 2 out of 2                        |
| ECFP_12                                       | -177077903        | <br>[*]N[c](:[cH]:[*]):[cH]:[*]             | 0.529        | 6 out of 10                       |
| ECFP_12                                       | -1236483485       | <br>[*]C(=[*])N[c](:[*]):[*]                | 0.46         | 9 out of 17                       |
| <b>Top Features for negative contribution</b> |                   |                                                                                                                                |              |                                   |
| <b>Fingerprint</b>                            | <b>Bit/Smiles</b> | <b>Feature Structure</b>                                                                                                       | <b>Score</b> | <b>Carcinogen in training set</b> |
| ECFP_12                                       | -1926229349       | <br>[*][c]1:[cH]:[cH]:[c]:(C):[cH]:[cH]:1  | -1.06        | 0 out of 6                        |
| ECFP_12                                       | -533780882        | <br>C[c]1:[cH]:[cH]:[*]:[cH]:[cH]:1       | -1.06        | 0 out of 6                        |

|         |           |                                                                                                                      |        |            |
|---------|-----------|----------------------------------------------------------------------------------------------------------------------|--------|------------|
| ECFP_12 | 129482634 | 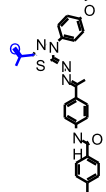<br><chem>[*]C(=[*])C(=O)C</chem> | -0.811 | 0 out of 4 |
|---------|-----------|----------------------------------------------------------------------------------------------------------------------|--------|------------|

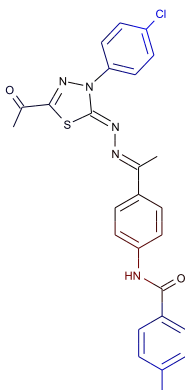

$C_{26}H_{22}ClN_5O_2S$

Molecular Weight: 504.00318

ALogP: 5.895

Rotatable Bonds: 6

Acceptors: 7

Donors: 1

## Model Prediction

Prediction: Non-Carcinogen

Probability: 0.208

Enrichment: 0.646

Bayesian Score: -6.27

Mahalanobis Distance: 11.3

Mahalanobis Distance p-value: 0.0321

Prediction: Positive if the Bayesian score is above the estimated best cutoff value from minimizing the false positive and false negative rate.

Probability: The estimated probability that the sample is in the positive category. This assumes that the Bayesian score follows a normal distribution and is different from the prediction using a cutoff.

Enrichment: An estimate of enrichment, that is, the increased likelihood (versus random) of this sample being in the category.

Bayesian Score: The standard Laplacian-modified Bayesian score.

Mahalanobis Distance: The Mahalanobis distance (MD) is the distance to the center of the training data. The larger the MD, the less trustworthy the prediction.

Mahalanobis Distance p-value: The p-value gives the fraction of training data with an MD greater than or equal to the one for the given sample, assuming normally distributed data. The smaller the p-value, the less trustworthy the prediction. For highly non-normal X properties (e.g., fingerprints), the MD p-value is wildly inaccurate.

## Structural Similar Compounds

| Name               | Emetine                                                             | Deserpidine                                                         | Carbenicillin                                                       |
|--------------------|---------------------------------------------------------------------|---------------------------------------------------------------------|---------------------------------------------------------------------|
| Structure          |                                                                     |                                                                     |                                                                     |
| Actual Endpoint    | Non-Carcinogen                                                      | Carcinogen                                                          | Non-Carcinogen                                                      |
| Predicted Endpoint | Non-Carcinogen                                                      | Carcinogen                                                          | Non-Carcinogen                                                      |
| Distance           | 0.707                                                               | 0.734                                                               | 0.758                                                               |
| Reference          | US FDA (Centre for Drug Eval.& Res./Off. Testing & Res.) Sept. 1997 | US FDA (Centre for Drug Eval.& Res./Off. Testing & Res.) Sept. 1997 | US FDA (Centre for Drug Eval.& Res./Off. Testing & Res.) Sept. 1997 |

## Model Applicability

Unknown features are fingerprint features in the query molecule, but not found or appearing too infrequently in the training set.

1. All properties and OPS components are within expected ranges.
2. Unknown ECFP\_2 feature: 128986386: [\*]N=C(/C)\[c](:[\*]):[\*]
3. Unknown ECFP\_2 feature: 562081661: [\*]C(=NN=[\*])[\*]
4. Unknown ECFP\_2 feature: -819426257: [\*]C(=NN=[\*])[\*]
5. Unknown ECFP\_2 feature: 189949281: [\*]N=C\1/S[\*]=[\*]N1[\*]
6. Unknown ECFP\_2 feature: -934225701: [\*]C(=[\*])C1=N[\*][\*]S1
7. Unknown ECFP\_2 feature: -1110911409: [\*]=C1[\*][\*]=NN1[c](:[\*]):[\*]

## Feature Contribution

### Top features for positive contribution

| Fingerprint | Bit/Smiles | Feature Structure | Score | Carcinogen in training set |
|-------------|------------|-------------------|-------|----------------------------|
|             |            |                   |       |                            |

|                                               |                   |                                                                                                                                  |              |                                   |
|-----------------------------------------------|-------------------|----------------------------------------------------------------------------------------------------------------------------------|--------------|-----------------------------------|
| ECFP_12                                       | -223149939        | 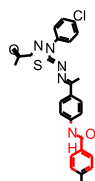<br>[*]NC(=O)[c]1:[cH]:[cH]:[*]:[cH]:[cH]:1   | 0.613        | 2 out of 2                        |
| ECFP_12                                       | -177077903        | <br>[*]N[c](:[cH]:[*]):[cH]:[*]               | 0.529        | 6 out of 10                       |
| ECFP_12                                       | -1236483485       | <br>[*]C(=[*])N[c](:[*]):[*]                  | 0.46         | 9 out of 17                       |
| <b>Top Features for negative contribution</b> |                   |                                                                                                                                  |              |                                   |
| <b>Fingerprint</b>                            | <b>Bit/Smiles</b> | <b>Feature Structure</b>                                                                                                         | <b>Score</b> | <b>Carcinogen in training set</b> |
| ECFP_12                                       | -1926229349       | <br>[*][c]1:[cH]:[cH]:[c]<br>(C):[cH]:[cH]:1 | -1.06        | 0 out of 6                        |
| ECFP_12                                       | -533780882        | <br>C[c]1:[cH]:[cH]:[*]:[cH]:[cH]:1         | -1.06        | 0 out of 6                        |

|         |          |                                                                                                                     |        |             |
|---------|----------|---------------------------------------------------------------------------------------------------------------------|--------|-------------|
| ECFP_12 | 99947387 | 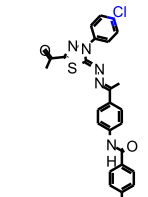<br><chem>[*]:[c](:[*])Cl</chem> | -0.817 | 8 out of 62 |
|---------|----------|---------------------------------------------------------------------------------------------------------------------|--------|-------------|



# Sorafenib

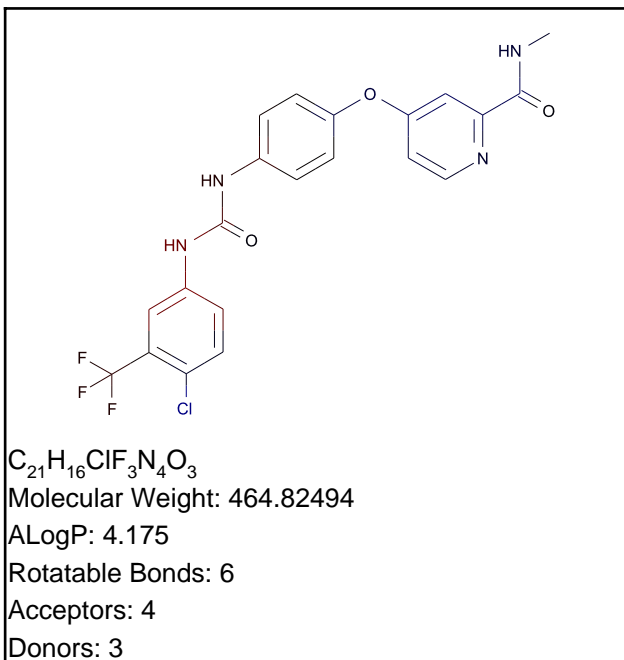

## Model Prediction

Prediction: Non-Carcinogen

Probability: 0.236

Enrichment: 0.734

Bayesian Score: -3.76

Mahalanobis Distance: 12.2

Mahalanobis Distance p-value: 0.00229

Prediction: Positive if the Bayesian score is above the estimated best cutoff value from minimizing the false positive and false negative rate.

Probability: The estimated probability that the sample is in the positive category. This assumes that the Bayesian score follows a normal distribution and is different from the prediction using a cutoff.

Enrichment: An estimate of enrichment, that is, the increased likelihood (versus random) of this sample being in the category.

Bayesian Score: The standard Laplacian-modified Bayesian score.

Mahalanobis Distance: The Mahalanobis distance (MD) is the distance to the center of the training data. The larger the MD, the less trustworthy the prediction.

Mahalanobis Distance p-value: The p-value gives the fraction of training data with an MD greater than or equal to the one for the given sample, assuming normally distributed data. The smaller the p-value, the less trustworthy the prediction. For highly non-normal X properties (e.g., fingerprints), the MD p-value is wildly inaccurate.

# TOPKAT\_Rat\_Female\_FDA\_None\_vs\_Carcinogen

## Structural Similar Compounds

| Name               | Glimepiride                                                                         | Glyburide                                                                           | Fluvastatin                                                                         |
|--------------------|-------------------------------------------------------------------------------------|-------------------------------------------------------------------------------------|-------------------------------------------------------------------------------------|
| Structure          | 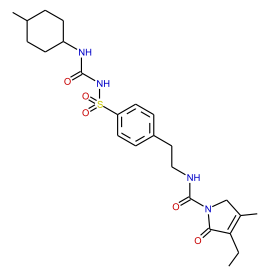 |  |  |
| Actual Endpoint    | Non-Carcinogen                                                                      | Non-Carcinogen                                                                      | Non-Carcinogen                                                                      |
| Predicted Endpoint | Non-Carcinogen                                                                      | Non-Carcinogen                                                                      | Non-Carcinogen                                                                      |
| Distance           | 0.620                                                                               | 0.635                                                                               | 0.635                                                                               |
| Reference          | US FDA (Centre for Drug Eval.& Res./Off. Testing & Res.) Sept. 1997                 | US FDA (Centre for Drug Eval.& Res./Off. Testing & Res.) Sept. 1997                 | US FDA (Centre for Drug Eval.& Res./Off. Testing & Res.) Sept. 1997                 |

## Model Applicability

Unknown features are fingerprint features in the query molecule, but not found or appearing too infrequently in the training set.

1. All properties and OPS components are within expected ranges.

## Feature Contribution

### Top features for positive contribution

| Fingerprint | Bit/Smiles | Feature Structure                                                                                                                                                        | Score | Carcinogen in training set |
|-------------|------------|--------------------------------------------------------------------------------------------------------------------------------------------------------------------------|-------|----------------------------|
| ECFP_12     | -970385855 | 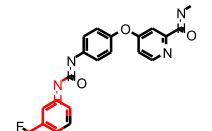<br><chem>[*]N(c1cc2cc(F)ccc2n1)[cH]:[*]:[c]([*]):[c]([*]):[c]([*]):1)C(=O)N</chem> | 0.613 | 2 out of 2                 |

|                                               |                   |                                                                                                                          |              |                                   |
|-----------------------------------------------|-------------------|--------------------------------------------------------------------------------------------------------------------------|--------------|-----------------------------------|
| ECFP_12                                       | -177077903        | 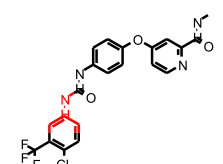<br>[*]N[c](:[cH]:[*]):[c<br>H]:[*]   | 0.529        | 6 out of 10                       |
| ECFP_12                                       | -1236483485       | <br>[*]C(=[*])N[c](:[*]):<br>[*]      | 0.46         | 9 out of 17                       |
| <b>Top Features for negative contribution</b> |                   |                                                                                                                          |              |                                   |
| <b>Fingerprint</b>                            | <b>Bit/Smiles</b> | <b>Feature Structure</b>                                                                                                 | <b>Score</b> | <b>Carcinogen in training set</b> |
| ECFP_12                                       | 1335691903        | <br>[*][c](:[*]):[c](Cl):<br>[cH]:[*] | -1.11        | 2 out of 26                       |
| ECFP_12                                       | 99947387          | <br>[*]:[c](:[*])Cl                  | -0.817       | 8 out of 62                       |
| ECFP_12                                       | 1413420509        | <br>[*]C(=[*])[c](:[cH]:[*])n:[*]   | -0.661       | 0 out of 3                        |

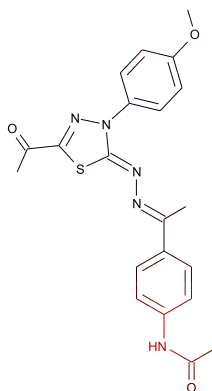

$C_{21}H_{21}N_5O_3S$

Molecular Weight: 423.48813

ALogP: 3.064

Rotatable Bonds: 6

Acceptors: 8

Donors: 1

## Model Prediction

**Prediction: Multiple-Carcinogen**

Probability: 0.692

Enrichment: 1.85

Bayesian Score: 5.3

Mahalanobis Distance: 15.8

Mahalanobis Distance p-value: 4.69e-007

Prediction: Positive if the Bayesian score is above the estimated best cutoff value from minimizing the false positive and false negative rate.

Probability: The estimated probability that the sample is in the positive category. This assumes that the Bayesian score follows a normal distribution and is different from the prediction using a cutoff.

Enrichment: An estimate of enrichment, that is, the increased likelihood (versus random) of this sample being in the category.

Bayesian Score: The standard Laplacian-modified Bayesian score.

Mahalanobis Distance: The Mahalanobis distance (MD) is the distance to the center of the training data. The larger the MD, the less trustworthy the prediction.

Mahalanobis Distance p-value: The p-value gives the fraction of training data with an MD greater than or equal to the one for the given sample, assuming normally distributed data. The smaller the p-value, the less trustworthy the prediction. For highly non-normal X properties (e.g., fingerprints), the MD p-value is wildly inaccurate.

## Structural Similar Compounds

| Name               | Moricizine                                                          | Diltiazem                                                           | Nicardipine                                                         |
|--------------------|---------------------------------------------------------------------|---------------------------------------------------------------------|---------------------------------------------------------------------|
| Structure          |                                                                     |                                                                     |                                                                     |
| Actual Endpoint    | Single-Carcinogen                                                   | Multiple-Carcinogen                                                 | Single-Carcinogen                                                   |
| Predicted Endpoint | Single-Carcinogen                                                   | Multiple-Carcinogen                                                 | Single-Carcinogen                                                   |
| Distance           | 0.620                                                               | 0.671                                                               | 0.702                                                               |
| Reference          | US FDA (Centre for Drug Eval.& Res./Off. Testing & Res.) Sept. 1997 | US FDA (Centre for Drug Eval.& Res./Off. Testing & Res.) Sept. 1997 | US FDA (Centre for Drug Eval.& Res./Off. Testing & Res.) Sept. 1997 |

## Model Applicability

Unknown features are fingerprint features in the query molecule, but not found or appearing too infrequently in the training set.

- OPS PC15 out of range. Value: 2.8947. Training min, max, SD, explained variance: -2.9572, 2.6953, 1.089, 0.0176.

## Feature Contribution

### Top features for positive contribution

| Fingerprint | Bit/Smiles | Feature Structure                  | Score | Multiple-Carcinogen in training set |
|-------------|------------|------------------------------------|-------|-------------------------------------|
| SCFP_4      | 2097618059 | <br>[*]:[cH]:[c](NC(=O)C):[cH]:[*] | 0.73  | 5 out of 6                          |

|                                               |                   |                                                                                                                                                                                    |              |                                            |
|-----------------------------------------------|-------------------|------------------------------------------------------------------------------------------------------------------------------------------------------------------------------------|--------------|--------------------------------------------|
| SCFP_4                                        | 1631845520        | 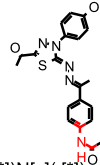<br><chem>[*]C(=[*])N[c](:[*]):</chem><br><chem>[*]</chem>                                      | 0.601        | 6 out of 9                                 |
| SCFP_4                                        | 17                | <br><chem>[*]S[*]</chem>                                                                        | 0.548        | 10 out of 17                               |
| <b>Top Features for negative contribution</b> |                   |                                                                                                                                                                                    |              |                                            |
| <b>Fingerprint</b>                            | <b>Bit/Smiles</b> | <b>Feature Structure</b>                                                                                                                                                           | <b>Score</b> | <b>Multiple-Carcinogen in training set</b> |
| SCFP_4                                        | -1380909229       | <br><chem>[*]N([*])[c]1:[cH]:[*]</chem><br><chem>]:[c]([*]):[cH]:[cH]</chem><br><chem>:1</chem> | -0.413       | 3 out of 16                                |
| SCFP_4                                        | 1334669481        | <br><chem>[*]N([*])[c](:[cH])[[*]</chem><br><chem>]:[cH]:[*]</chem>                           | -0.24        | 4 out of 17                                |
| SCFP_4                                        | 276283342         | <br><chem>[*]:[c](:[*])OC</chem>                                                              | -0.106       | 5 out of 18                                |



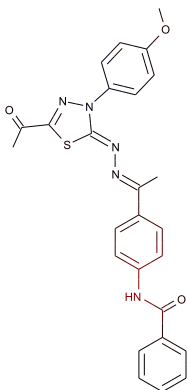

$C_{26}H_{23}N_5O_3S$

Molecular Weight: 485.55751

ALogP: 4.728

Rotatable Bonds: 7

Acceptors: 8

Donors: 1

## Model Prediction

Prediction: Multiple-Carcinogen

Probability: 0.635

Enrichment: 1.7

Bayesian Score: 3.98

Mahalanobis Distance: 18.9

Mahalanobis Distance p-value: 5.91e-010

Prediction: Positive if the Bayesian score is above the estimated best cutoff value from minimizing the false positive and false negative rate.

Probability: The estimated probability that the sample is in the positive category. This assumes that the Bayesian score follows a normal distribution and is different from the prediction using a cutoff.

Enrichment: An estimate of enrichment, that is, the increased likelihood (versus random) of this sample being in the category.

Bayesian Score: The standard Laplacian-modified Bayesian score.

Mahalanobis Distance: The Mahalanobis distance (MD) is the distance to the center of the training data. The larger the MD, the less trustworthy the prediction.

Mahalanobis Distance p-value: The p-value gives the fraction of training data with an MD greater than or equal to the one for the given sample, assuming normally distributed data. The smaller the p-value, the less trustworthy the prediction. For highly non-normal X properties (e.g., fingerprints), the MD p-value is wildly inaccurate.

## Structural Similar Compounds

| Name               | Nicardipine                                                         | Deserpidine                                                         | Moricizine                                                          |
|--------------------|---------------------------------------------------------------------|---------------------------------------------------------------------|---------------------------------------------------------------------|
| Structure          |                                                                     |                                                                     |                                                                     |
| Actual Endpoint    | Single-Carcinogen                                                   | Single-Carcinogen                                                   | Single-Carcinogen                                                   |
| Predicted Endpoint | Single-Carcinogen                                                   | Single-Carcinogen                                                   | Single-Carcinogen                                                   |
| Distance           | 0.612                                                               | 0.656                                                               | 0.689                                                               |
| Reference          | US FDA (Centre for Drug Eval.& Res./Off. Testing & Res.) Sept. 1997 | US FDA (Centre for Drug Eval.& Res./Off. Testing & Res.) Sept. 1997 | US FDA (Centre for Drug Eval.& Res./Off. Testing & Res.) Sept. 1997 |

## Model Applicability

Unknown features are fingerprint features in the query molecule, but not found or appearing too infrequently in the training set.

1. All properties and OPS components are within expected ranges.

## Feature Contribution

### Top features for positive contribution

| Fingerprint | Bit/Smiles | Feature Structure                | Score | Multiple-Carcinogen in training set |
|-------------|------------|----------------------------------|-------|-------------------------------------|
| SCFP_4      | 1631845520 | <br>[*]C(=[*])N[c](:[*]):<br>[*] | 0.601 | 6 out of 9                          |

|                                               |                   |                                                                                                                                             |              |                                            |
|-----------------------------------------------|-------------------|---------------------------------------------------------------------------------------------------------------------------------------------|--------------|--------------------------------------------|
| SCFP_4                                        | 17                | 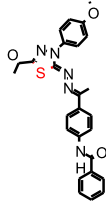<br>[*]S[*]                                              | 0.548        | 10 out of 17                               |
| SCFP_4                                        | -1375926917       | <br>[*]N[c]1:[cH]:[ ]:[c]<br>([*]):[cH]:[cH]:1           | 0.522        | 6 out of 10                                |
| <b>Top Features for negative contribution</b> |                   |                                                                                                                                             |              |                                            |
| <b>Fingerprint</b>                            | <b>Bit/Smiles</b> | <b>Feature Structure</b>                                                                                                                    | <b>Score</b> | <b>Multiple-Carcinogen in training set</b> |
| SCFP_4                                        | -1380909229       | <br>[*]N([*])[c]1:[cH]:[*]<br>]:[c]([*]):[cH]:[cH]<br>:1 | -0.413       | 3 out of 16                                |
| SCFP_4                                        | 1334669481        | <br>[*]N([*])[c](-:[cH]:[*]<br>):[cH]:[*]              | -0.24        | 4 out of 17                                |
| SCFP_4                                        | 276283342         | <br>[*]:[c](-[*])OC                                    | -0.106       | 5 out of 18                                |





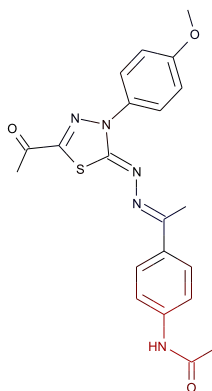

$C_{21}H_{21}N_5O_3S$

Molecular Weight: 423.48813

ALogP: 3.064

Rotatable Bonds: 6

Acceptors: 8

Donors: 1

## Model Prediction

Prediction: **Carcinogen**

Probability: 0.456

Enrichment: 1.36

Bayesian Score: 3.11

Mahalanobis Distance: 14.2

Mahalanobis Distance p-value: 2.25e-005

Prediction: Positive if the Bayesian score is above the estimated best cutoff value from minimizing the false positive and false negative rate.

Probability: The estimated probability that the sample is in the positive category. This assumes that the Bayesian score follows a normal distribution and is different from the prediction using a cutoff.

Enrichment: An estimate of enrichment, that is, the increased likelihood (versus random) of this sample being in the category.

Bayesian Score: The standard Laplacian-modified Bayesian score.

Mahalanobis Distance: The Mahalanobis distance (MD) is the distance to the center of the training data. The larger the MD, the less trustworthy the prediction.

Mahalanobis Distance p-value: The p-value gives the fraction of training data with an MD greater than or equal to the one for the given sample, assuming normally distributed data. The smaller the p-value, the less trustworthy the prediction. For highly non-normal X properties (e.g., fingerprints), the MD p-value is wildly inaccurate.

## Structural Similar Compounds

| Name               | Nisoldipine                                                         | Doxazosin                                                           | Isradipine                                                          |
|--------------------|---------------------------------------------------------------------|---------------------------------------------------------------------|---------------------------------------------------------------------|
| Structure          |                                                                     |                                                                     |                                                                     |
| Actual Endpoint    | Non-Carcinogen                                                      | Non-Carcinogen                                                      | Carcinogen                                                          |
| Predicted Endpoint | Carcinogen                                                          | Non-Carcinogen                                                      | Carcinogen                                                          |
| Distance           | 0.589                                                               | 0.608                                                               | 0.612                                                               |
| Reference          | US FDA (Centre for Drug Eval.& Res./Off. Testing & Res.) Sept. 1997 | US FDA (Centre for Drug Eval.& Res./Off. Testing & Res.) Sept. 1997 | US FDA (Centre for Drug Eval.& Res./Off. Testing & Res.) Sept. 1997 |

## Model Applicability

Unknown features are fingerprint features in the query molecule, but not found or appearing too infrequently in the training set.

1. All properties and OPS components are within expected ranges.

## Feature Contribution

### Top features for positive contribution

| Fingerprint | Bit/Smiles | Feature Structure                         | Score | Carcinogen in training set |
|-------------|------------|-------------------------------------------|-------|----------------------------|
| SCFP_6      | 347048986  | <br>[*]C(=[*])N[c]1:[cH]:[cH]:[cH]:[cH]:1 | 0.615 | 5 out of 7                 |

| SCFP_6                                 | 814408713   | 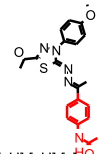<br><chem>[*][c]1:[cH]:[cH]:[c]:[c]1</chem><br><chem>(NC(=O)C):[cH]:[cH]:</chem><br>1 | 0.603  | 2 out of 2                 |
|----------------------------------------|-------------|--------------------------------------------------------------------------------------------------------------------------------------------------------------------------|--------|----------------------------|
| SCFP_6                                 | 1626825020  | <br><chem>[*]:[c]:[*])NC(=O)C</chem>                                                  | 0.561  | 3 out of 4                 |
| Top Features for negative contribution |             |                                                                                                                                                                          |        |                            |
| Fingerprint                            | Bit/Smiles  | Feature Structure                                                                                                                                                        | Score  | Carcinogen in training set |
| SCFP_6                                 | 1287669168  | <br><chem>[*][c]1:[cH]:[cH]:[c]:[c]1</chem><br><chem>(OC):[cH]:[cH]:1</chem>          | -0.38  | 1 out of 6                 |
| SCFP_6                                 | -1325991669 | <br><chem>[*]N1[*]C(=N1)[*]</chem>                                                   | -0.278 | 0 out of 1                 |
| SCFP_6                                 | -331724199  | <br><chem>[*]N=C(C)[c]:[*]</chem><br>:[*]                                           | -0.278 | 0 out of 1                 |

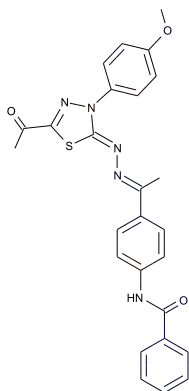

$C_{26}H_{23}N_5O_3S$

Molecular Weight: 485.55751

ALogP: 4.728

Rotatable Bonds: 7

Acceptors: 8

Donors: 1

## Model Prediction

Prediction: Non-Carcinogen

Probability: 0.322

Enrichment: 0.962

Bayesian Score: -1.27

Mahalanobis Distance: 16.4

Mahalanobis Distance p-value: 8.15e-010

Prediction: Positive if the Bayesian score is above the estimated best cutoff value from minimizing the false positive and false negative rate.

Probability: The estimated probability that the sample is in the positive category. This assumes that the Bayesian score follows a normal distribution and is different from the prediction using a cutoff.

Enrichment: An estimate of enrichment, that is, the increased likelihood (versus random) of this sample being in the category.

Bayesian Score: The standard Laplacian-modified Bayesian score.

Mahalanobis Distance: The Mahalanobis distance (MD) is the distance to the center of the training data. The larger the MD, the less trustworthy the prediction.

Mahalanobis Distance p-value: The p-value gives the fraction of training data with an MD greater than or equal to the one for the given sample, assuming normally distributed data. The smaller the p-value, the less trustworthy the prediction. For highly non-normal X properties (e.g., fingerprints), the MD p-value is wildly inaccurate.

## Structural Similar Compounds

| Name               | Carbenicillin                                                       | Deserpidine                                                         | Moricizine                                                          |
|--------------------|---------------------------------------------------------------------|---------------------------------------------------------------------|---------------------------------------------------------------------|
| Structure          |                                                                     |                                                                     |                                                                     |
| Actual Endpoint    | Non-Carcinogen                                                      | Carcinogen                                                          | Carcinogen                                                          |
| Predicted Endpoint | Non-Carcinogen                                                      | Carcinogen                                                          | Carcinogen                                                          |
| Distance           | 0.654                                                               | 0.688                                                               | 0.707                                                               |
| Reference          | US FDA (Centre for Drug Eval.& Res./Off. Testing & Res.) Sept. 1997 | US FDA (Centre for Drug Eval.& Res./Off. Testing & Res.) Sept. 1997 | US FDA (Centre for Drug Eval.& Res./Off. Testing & Res.) Sept. 1997 |

## Model Applicability

Unknown features are fingerprint features in the query molecule, but not found or appearing too infrequently in the training set.

1. All properties and OPS components are within expected ranges.

## Feature Contribution

### Top features for positive contribution

| Fingerprint | Bit/Smiles | Feature Structure                           | Score | Carcinogen in training set |
|-------------|------------|---------------------------------------------|-------|----------------------------|
| SCFP_6      | -347048986 | <br>[*]C(=*)N[c]1:[cH]:[cH]:[*]:[cH]:[cH]:1 | 0.615 | 5 out of 7                 |

|                                               |                   |                                                                                                                                                           |              |                                   |
|-----------------------------------------------|-------------------|-----------------------------------------------------------------------------------------------------------------------------------------------------------|--------------|-----------------------------------|
| SCFP_6                                        | -1380909229       | 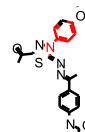<br><chem>[*]N([*])[c]1:[c]([*])[c]([*]):[c]([*]):[c]H]:[c]H]:1</chem> | 0.287        | 17 out of 39                      |
| SCFP_6                                        | -1375926917       | <br><chem>[*]N[c]1:[c]H]:[c]([*]):[c]([*]):[c]H]:[c]H]:1</chem>        | 0.251        | 11 out of 26                      |
| <b>Top Features for negative contribution</b> |                   |                                                                                                                                                           |              |                                   |
| <b>Fingerprint</b>                            | <b>Bit/Smiles</b> | <b>Feature Structure</b>                                                                                                                                  | <b>Score</b> | <b>Carcinogen in training set</b> |
| SCFP_6                                        | 1653911926        | <br><chem>[*][c]1:[c]H]:[c]H]:[c]H]:[c]H]:[c]H]:[c]H]:1</chem>         | -0.504       | 12 out of 64                      |
| SCFP_6                                        | 1257084377        | <br><chem>[*]NC(=O)[c]([*]):[c]([*]):[c]H]:[c]H]:1</chem>             | -0.436       | 4 out of 21                       |
| SCFP_6                                        | 1287669168        | <br><chem>[*][c]1:[c]H]:[c]H]:[c]H]:[c]([*]):[c]H]:[c]H]:1</chem>    | -0.38        | 1 out of 6                        |

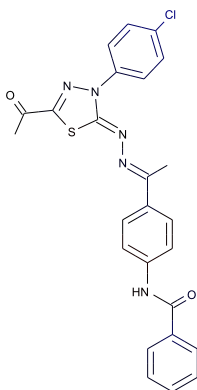

$C_{25}H_{20}ClN_5O_2S$

Molecular Weight: 489.97659

ALogP: 5.409

Rotatable Bonds: 6

Acceptors: 7

Donors: 1

## Model Prediction

Prediction: Non-Carcinogen

Probability: 0.286

Enrichment: 0.857

Bayesian Score: -2.7

Mahalanobis Distance: 15.2

Mahalanobis Distance p-value: 2.64e-007

Prediction: Positive if the Bayesian score is above the estimated best cutoff value from minimizing the false positive and false negative rate.

Probability: The estimated probability that the sample is in the positive category. This assumes that the Bayesian score follows a normal distribution and is different from the prediction using a cutoff.

Enrichment: An estimate of enrichment, that is, the increased likelihood (versus random) of this sample being in the category.

Bayesian Score: The standard Laplacian-modified Bayesian score.

Mahalanobis Distance: The Mahalanobis distance (MD) is the distance to the center of the training data. The larger the MD, the less trustworthy the prediction.

Mahalanobis Distance p-value: The p-value gives the fraction of training data with an MD greater than or equal to the one for the given sample, assuming normally distributed data. The smaller the p-value, the less trustworthy the prediction. For highly non-normal X properties (e.g., fingerprints), the MD p-value is wildly inaccurate.

## Structural Similar Compounds

| Name               | Emetine                                                             | Carbenicillin                                                       | Moricizine                                                          |
|--------------------|---------------------------------------------------------------------|---------------------------------------------------------------------|---------------------------------------------------------------------|
| Structure          |                                                                     |                                                                     |                                                                     |
| Actual Endpoint    | Non-Carcinogen                                                      | Non-Carcinogen                                                      | Carcinogen                                                          |
| Predicted Endpoint | Non-Carcinogen                                                      | Non-Carcinogen                                                      | Carcinogen                                                          |
| Distance           | 0.694                                                               | 0.701                                                               | 0.708                                                               |
| Reference          | US FDA (Centre for Drug Eval.& Res./Off. Testing & Res.) Sept. 1997 | US FDA (Centre for Drug Eval.& Res./Off. Testing & Res.) Sept. 1997 | US FDA (Centre for Drug Eval.& Res./Off. Testing & Res.) Sept. 1997 |

## Model Applicability

Unknown features are fingerprint features in the query molecule, but not found or appearing too infrequently in the training set.

- OPS PC1 out of range. Value: -5.7239. Training min, max, SD, explained variance: -5.694, 8.348, 2.949, 0.0811.

## Feature Contribution

### Top features for positive contribution

| Fingerprint | Bit/Smiles | Feature Structure                             | Score | Carcinogen in training set |
|-------------|------------|-----------------------------------------------|-------|----------------------------|
| SCFP_6      | -347048986 | <br>[*]C(=[*])N[c]1:[cH]:[cH]:[*]:[cH]:[cH]:1 | 0.615 | 5 out of 7                 |

|                                               |                   |                                                                                                                                              |              |                                   |
|-----------------------------------------------|-------------------|----------------------------------------------------------------------------------------------------------------------------------------------|--------------|-----------------------------------|
| SCFP_6                                        | -1380909229       | 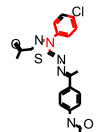<br>[*]N([*])[c]1:[cH]([*])<br>:[c]([*]):[cH]:[cH]<br>:1  | 0.287        | 17 out of 39                      |
| SCFP_6                                        | -1375926917       | <br>[*]N[c]1:[cH]:[*]:[c]<br>([*]):[cH]:[cH]:1            | 0.251        | 11 out of 26                      |
| <b>Top Features for negative contribution</b> |                   |                                                                                                                                              |              |                                   |
| <b>Fingerprint</b>                            | <b>Bit/Smiles</b> | <b>Feature Structure</b>                                                                                                                     | <b>Score</b> | <b>Carcinogen in training set</b> |
| SCFP_6                                        | 341480432         | <br>[*]N([*])[c]1:[cH]([*])<br>H]:[c](Cl):[cH]:[cH]<br>:1 | -0.674       | 0 out of 3                        |
| SCFP_6                                        | 1653911926        | <br>[*][c]1:[cH]:[cH]:[cH]<br>:[cH]:[cH]:1               | -0.504       | 12 out of 64                      |
| SCFP_6                                        | 1905487031        | <br>[*][c]1:[cH]:[cH]:[c]<br>(Cl):[cH]:[cH]:1           | -0.48        | 2 out of 12                       |

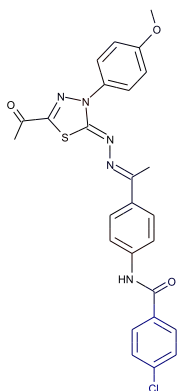

$C_{26}H_{22}ClN_5O_3S$

Molecular Weight: 520.00258

ALogP: 5.392

Rotatable Bonds: 7

Acceptors: 8

Donors: 1

## Model Prediction

Prediction: Non-Carcinogen

Probability: 0.277

Enrichment: 0.829

Bayesian Score: -3.11

Mahalanobis Distance: 15.8

Mahalanobis Distance p-value: 1.38e-008

Prediction: Positive if the Bayesian score is above the estimated best cutoff value from minimizing the false positive and false negative rate.

Probability: The estimated probability that the sample is in the positive category. This assumes that the Bayesian score follows a normal distribution and is different from the prediction using a cutoff.

Enrichment: An estimate of enrichment, that is, the increased likelihood (versus random) of this sample being in the category.

Bayesian Score: The standard Laplacian-modified Bayesian score.

Mahalanobis Distance: The Mahalanobis distance (MD) is the distance to the center of the training data. The larger the MD, the less trustworthy the prediction.

Mahalanobis Distance p-value: The p-value gives the fraction of training data with an MD greater than or equal to the one for the given sample, assuming normally distributed data. The smaller the p-value, the less trustworthy the prediction. For highly non-normal X properties (e.g., fingerprints), the MD p-value is wildly inaccurate.

## Structural Similar Compounds

| Name               | Deserpidine                                                         | Carbenicillin                                                       | Reserpine                                                           |
|--------------------|---------------------------------------------------------------------|---------------------------------------------------------------------|---------------------------------------------------------------------|
| Structure          |                                                                     |                                                                     |                                                                     |
| Actual Endpoint    | Carcinogen                                                          | Non-Carcinogen                                                      | Carcinogen                                                          |
| Predicted Endpoint | Carcinogen                                                          | Non-Carcinogen                                                      | Carcinogen                                                          |
| Distance           | 0.634                                                               | 0.709                                                               | 0.716                                                               |
| Reference          | US FDA (Centre for Drug Eval.& Res./Off. Testing & Res.) Sept. 1997 | US FDA (Centre for Drug Eval.& Res./Off. Testing & Res.) Sept. 1997 | US FDA (Centre for Drug Eval.& Res./Off. Testing & Res.) Sept. 1997 |

## Model Applicability

Unknown features are fingerprint features in the query molecule, but not found or appearing too infrequently in the training set.

1. All properties and OPS components are within expected ranges.

## Feature Contribution

### Top features for positive contribution

| Fingerprint | Bit/Smiles | Feature Structure                           | Score | Carcinogen in training set |
|-------------|------------|---------------------------------------------|-------|----------------------------|
| SCFP_6      | -347048986 | <br>[*]C(=*)N[c]1:[cH]:[cH]:[*]:[cH]:[cH]:1 | 0.615 | 5 out of 7                 |

|                                               |                   |                                                                                                                                                               |              |                                   |
|-----------------------------------------------|-------------------|---------------------------------------------------------------------------------------------------------------------------------------------------------------|--------------|-----------------------------------|
| SCFP_6                                        | -1380909229       | 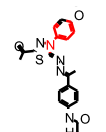<br><chem>[*]N([*])[c]1:[cH]:[*]<br/>]:[c]([*]):[cH]:[cH]<br/>:1</chem>    | 0.287        | 17 out of 39                      |
| SCFP_6                                        | -1375926917       | <br><chem>[*]N[c]1:[cH]:[*][c]<br/>([*]):[cH]:[cH]:1</chem>                | 0.251        | 11 out of 26                      |
| <b>Top Features for negative contribution</b> |                   |                                                                                                                                                               |              |                                   |
| <b>Fingerprint</b>                            | <b>Bit/Smiles</b> | <b>Feature Structure</b>                                                                                                                                      | <b>Score</b> | <b>Carcinogen in training set</b> |
| SCFP_6                                        | 1915307678        | <br><chem>[*]C(=[*])[c]1:[cH]:[*]<br/>cH]:[c](Cl):[cH]:[cH]<br/>]:1</chem> | -0.496       | 0 out of 2                        |
| SCFP_6                                        | 1905487031        | <br><chem>[*][c]1:[cH]:[cH]:[*][c]<br/>(Cl):[cH]:[cH]:1</chem>            | -0.48        | 2 out of 12                       |
| SCFP_6                                        | 1257084377        | <br><chem>[*]NC(=O)[c]([*])[*]<br/>]</chem>                              | -0.436       | 4 out of 21                       |



18d

TOPKAT\_Rat\_Male\_FDA\_None\_vs\_Carcinogen

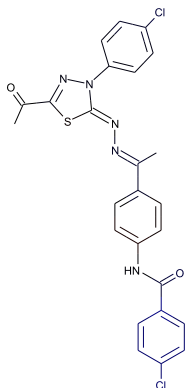C<sub>25</sub>H<sub>19</sub>Cl<sub>2</sub>N<sub>5</sub>O<sub>2</sub>S

Molecular Weight: 524.42166

ALogP: 6.073

Rotatable Bonds: 6

Acceptors: 7

Donors: 1

## Model Prediction

Prediction: Non-Carcinogen

Probability: 0.291

Enrichment: 0.869

Bayesian Score: -2.52

Mahalanobis Distance: 15.3

Mahalanobis Distance p-value: 1.48e-007

Prediction: Positive if the Bayesian score is above the estimated best cutoff value from minimizing the false positive and false negative rate.

Probability: The estimated probability that the sample is in the positive category. This assumes that the Bayesian score follows a normal distribution and is different from the prediction using a cutoff.

Enrichment: An estimate of enrichment, that is, the increased likelihood (versus random) of this sample being in the category.

Bayesian Score: The standard Laplacian-modified Bayesian score.

Mahalanobis Distance: The Mahalanobis distance (MD) is the distance to the center of the training data. The larger the MD, the less trustworthy the prediction.

Mahalanobis Distance p-value: The p-value gives the fraction of training data with an MD greater than or equal to the one for the given sample, assuming normally distributed data. The smaller the p-value, the less trustworthy the prediction. For highly non-normal X properties (e.g., fingerprints), the MD p-value is wildly inaccurate.

## Structural Similar Compounds

| Name               | Deserpidine                                                         | Emetine                                                             | Ketoconazole                                                        |
|--------------------|---------------------------------------------------------------------|---------------------------------------------------------------------|---------------------------------------------------------------------|
| Structure          |                                                                     |                                                                     |                                                                     |
| Actual Endpoint    | Carcinogen                                                          | Non-Carcinogen                                                      | Non-Carcinogen                                                      |
| Predicted Endpoint | Carcinogen                                                          | Non-Carcinogen                                                      | Non-Carcinogen                                                      |
| Distance           | 0.711                                                               | 0.718                                                               | 0.754                                                               |
| Reference          | US FDA (Centre for Drug Eval.& Res./Off. Testing & Res.) Sept. 1997 | US FDA (Centre for Drug Eval.& Res./Off. Testing & Res.) Sept. 1997 | US FDA (Centre for Drug Eval.& Res./Off. Testing & Res.) Sept. 1997 |

## Model Applicability

Unknown features are fingerprint features in the query molecule, but not found or appearing too infrequently in the training set.

1. All properties and OPS components are within expected ranges.

## Feature Contribution

### Top features for positive contribution

| Fingerprint | Bit/Smiles | Feature Structure                                 | Score | Carcinogen in training set |
|-------------|------------|---------------------------------------------------|-------|----------------------------|
| SCFP_6      | 347048986  | <br>[*]C(=[*])N[c]1:[cH]:<br>[cH]:[*]:[cH]:[cH]:1 | 0.615 | 5 out of 7                 |

|                                               |                   |                                                                                                                                              |              |                                   |
|-----------------------------------------------|-------------------|----------------------------------------------------------------------------------------------------------------------------------------------|--------------|-----------------------------------|
| SCFP_6                                        | -1380909229       | 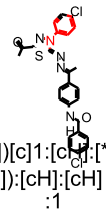<br>[*]N([*])[c]1:[cH]:[*]<br>:[c]([*]):[cH]:[cH]<br>:1   | 0.287        | 17 out of 39                      |
| SCFP_6                                        | -1375926917       | <br>[*]N[c]1:[cH]:[*][c]<br>([*]):[cH]:[cH]:1             | 0.251        | 11 out of 26                      |
| <b>Top Features for negative contribution</b> |                   |                                                                                                                                              |              |                                   |
| <b>Fingerprint</b>                            | <b>Bit/Smiles</b> | <b>Feature Structure</b>                                                                                                                     | <b>Score</b> | <b>Carcinogen in training set</b> |
| SCFP_6                                        | 341480432         | <br>[*]N([*])[c]1:[cH]:[c]<br>H]:[c](Cl):[cH]:[cH]<br>:1  | -0.674       | 0 out of 3                        |
| SCFP_6                                        | 1915307678        | <br>[*]C=[*])[c]1:[cH]:[c]<br>H]:[c](Cl):[cH]:[cH]<br>:1 | -0.496       | 0 out of 2                        |
| SCFP_6                                        | 1905487031        | <br>[*][c]1:[cH]:[cH]:[*][c]<br>(Cl):[cH]:[cH]:1        | -0.48        | 2 out of 12                       |

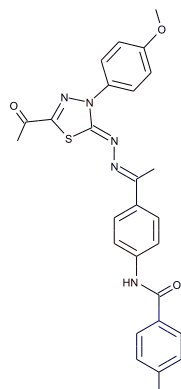

$C_{27}H_{25}N_5O_3S$

Molecular Weight: 499.58409

ALogP: 5.214

Rotatable Bonds: 7

Acceptors: 8

Donors: 1

## Model Prediction

Prediction: Non-Carcinogen

Probability: 0.319

Enrichment: 0.953

Bayesian Score: -1.38

Mahalanobis Distance: 16.2

Mahalanobis Distance p-value: 1.65e-009

Prediction: Positive if the Bayesian score is above the estimated best cutoff value from minimizing the false positive and false negative rate.

Probability: The estimated probability that the sample is in the positive category. This assumes that the Bayesian score follows a normal distribution and is different from the prediction using a cutoff.

Enrichment: An estimate of enrichment, that is, the increased likelihood (versus random) of this sample being in the category.

Bayesian Score: The standard Laplacian-modified Bayesian score.

Mahalanobis Distance: The Mahalanobis distance (MD) is the distance to the center of the training data. The larger the MD, the less trustworthy the prediction.

Mahalanobis Distance p-value: The p-value gives the fraction of training data with an MD greater than or equal to the one for the given sample, assuming normally distributed data. The smaller the p-value, the less trustworthy the prediction. For highly non-normal X properties (e.g., fingerprints), the MD p-value is wildly inaccurate.

## Structural Similar Compounds

| Name               | Deserpidine                                                         | Carbenicillin                                                       | Emetine                                                             |
|--------------------|---------------------------------------------------------------------|---------------------------------------------------------------------|---------------------------------------------------------------------|
| Structure          |                                                                     |                                                                     |                                                                     |
| Actual Endpoint    | Carcinogen                                                          | Non-Carcinogen                                                      | Non-Carcinogen                                                      |
| Predicted Endpoint | Carcinogen                                                          | Non-Carcinogen                                                      | Non-Carcinogen                                                      |
| Distance           | 0.655                                                               | 0.685                                                               | 0.711                                                               |
| Reference          | US FDA (Centre for Drug Eval.& Res./Off. Testing & Res.) Sept. 1997 | US FDA (Centre for Drug Eval.& Res./Off. Testing & Res.) Sept. 1997 | US FDA (Centre for Drug Eval.& Res./Off. Testing & Res.) Sept. 1997 |

## Model Applicability

Unknown features are fingerprint features in the query molecule, but not found or appearing too infrequently in the training set.

- All properties and OPS components are within expected ranges.

## Feature Contribution

### Top features for positive contribution

| Fingerprint | Bit/Smiles | Feature Structure                                 | Score | Carcinogen in training set |
|-------------|------------|---------------------------------------------------|-------|----------------------------|
| SCFP_6      | 347048986  | <br>[*]C(=[*])N[c]1:[cH]:<br>[cH]:[*]:[cH]:[cH]:1 | 0.615 | 5 out of 7                 |

|                                               |                   |                                                                                                                                                     |              |                                   |
|-----------------------------------------------|-------------------|-----------------------------------------------------------------------------------------------------------------------------------------------------|--------------|-----------------------------------|
| SCFP_6                                        | 1555568408        | 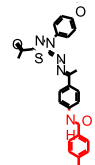<br><chem>[*]NC(=O)[c]1:[cH]:[cH]:[c(C):[cH]:[cH]:1</chem>       | 0.415        | 1 out of 1                        |
| SCFP_6                                        | 136686699         | <br><chem>[*]:[c](:[*])C</chem>                                  | 0.287        | 17 out of 39                      |
| <b>Top Features for negative contribution</b> |                   |                                                                                                                                                     |              |                                   |
| <b>Fingerprint</b>                            | <b>Bit/Smiles</b> | <b>Feature Structure</b>                                                                                                                            | <b>Score</b> | <b>Carcinogen in training set</b> |
| SCFP_6                                        | 2048398673        | <br><chem>[*]C(=[*])[c]1:[cH]:[cH]:[cH]:[c(C):[cH]:[cH]:1</chem> | -0.674       | 0 out of 3                        |
| SCFP_6                                        | 1257084377        | <br><chem>[*]NC(=O)[c](:[*]):[*]</chem>                         | -0.436       | 4 out of 21                       |
| SCFP_6                                        | 795925860         | <br><chem>[*][c]1:[cH]:[cH]:[c](C):[cH]:[cH]:1</chem>          | -0.38        | 1 out of 6                        |

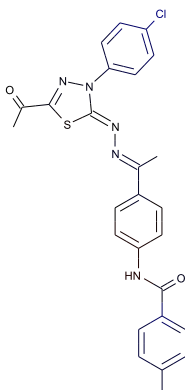

$C_{26}H_{22}ClN_5O_2S$

Molecular Weight: 504.00318

ALogP: 5.895

Rotatable Bonds: 6

Acceptors: 7

Donors: 1

## Model Prediction

Prediction: Non-Carcinogen

Probability: 0.289

Enrichment: 0.865

Bayesian Score: -2.58

Mahalanobis Distance: 15.6

Mahalanobis Distance p-value: 3.38e-008

Prediction: Positive if the Bayesian score is above the estimated best cutoff value from minimizing the false positive and false negative rate.

Probability: The estimated probability that the sample is in the positive category. This assumes that the Bayesian score follows a normal distribution and is different from the prediction using a cutoff.

Enrichment: An estimate of enrichment, that is, the increased likelihood (versus random) of this sample being in the category.

Bayesian Score: The standard Laplacian-modified Bayesian score.

Mahalanobis Distance: The Mahalanobis distance (MD) is the distance to the center of the training data. The larger the MD, the less trustworthy the prediction.

Mahalanobis Distance p-value: The p-value gives the fraction of training data with an MD greater than or equal to the one for the given sample, assuming normally distributed data. The smaller the p-value, the less trustworthy the prediction. For highly non-normal X properties (e.g., fingerprints), the MD p-value is wildly inaccurate.

## Structural Similar Compounds

| Name               | Emetine                                                             | Deserpidine                                                         | Ketoconazole                                                        |
|--------------------|---------------------------------------------------------------------|---------------------------------------------------------------------|---------------------------------------------------------------------|
| Structure          |                                                                     |                                                                     |                                                                     |
| Actual Endpoint    | Non-Carcinogen                                                      | Carcinogen                                                          | Non-Carcinogen                                                      |
| Predicted Endpoint | Non-Carcinogen                                                      | Carcinogen                                                          | Non-Carcinogen                                                      |
| Distance           | 0.697                                                               | 0.722                                                               | 0.740                                                               |
| Reference          | US FDA (Centre for Drug Eval.& Res./Off. Testing & Res.) Sept. 1997 | US FDA (Centre for Drug Eval.& Res./Off. Testing & Res.) Sept. 1997 | US FDA (Centre for Drug Eval.& Res./Off. Testing & Res.) Sept. 1997 |

## Model Applicability

Unknown features are fingerprint features in the query molecule, but not found or appearing too infrequently in the training set.

1. All properties and OPS components are within expected ranges.

## Feature Contribution

### Top features for positive contribution

| Fingerprint | Bit/Smiles | Feature Structure                               | Score | Carcinogen in training set |
|-------------|------------|-------------------------------------------------|-------|----------------------------|
| SCFP_6      | 347048986  | <br>[*]C(=*)N[c]1:[cH]:<br>[cH]:[*]:[cH]:[cH]:1 | 0.615 | 5 out of 7                 |

|                                               |                   |                                                                                                                                                  |              |                                   |
|-----------------------------------------------|-------------------|--------------------------------------------------------------------------------------------------------------------------------------------------|--------------|-----------------------------------|
| SCFP_6                                        | 1555568408        | 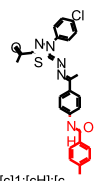<br><chem>[*]NC(=O)[c]1:[cH]:[cH]:[c](C):[cH]:[cH]:1</chem>   | 0.415        | 1 out of 1                        |
| SCFP_6                                        | 136686699         | <br><chem>[*]:[c](:[*])C</chem>                               | 0.287        | 17 out of 39                      |
| <b>Top Features for negative contribution</b> |                   |                                                                                                                                                  |              |                                   |
| <b>Fingerprint</b>                            | <b>Bit/Smiles</b> | <b>Feature Structure</b>                                                                                                                         | <b>Score</b> | <b>Carcinogen in training set</b> |
| SCFP_6                                        | 341480432         | <br><chem>[*]N([*])[c]1:[cH]:[cH]:[c](Cl):[cH]:[cH]:1</chem>  | -0.674       | 0 out of 3                        |
| SCFP_6                                        | 2048398673        | <br><chem>[*]C(=[*])[c]1:[cH]:[cH]:[c](C):[cH]:[cH]:1</chem> | -0.674       | 0 out of 3                        |
| SCFP_6                                        | 1905487031        | <br><chem>[*][c]1:[cH]:[cH]:[c](Cl):[cH]:[cH]:1</chem>      | -0.48        | 2 out of 12                       |

# Sorafenib

# TOPKAT\_Rat\_Male\_FDA\_None\_vs\_Carcinogen

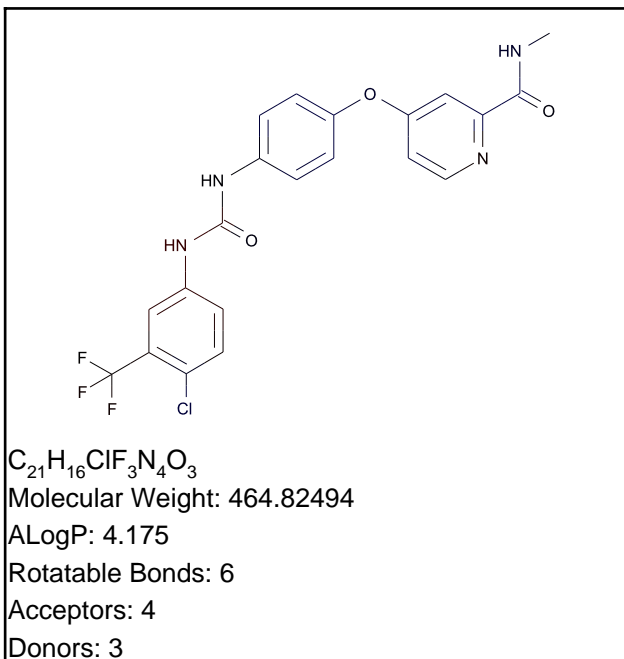

## Model Prediction

Prediction: Non-Carcinogen

Probability: 0.293

Enrichment: 0.878

Bayesian Score: -2.4

Mahalanobis Distance: 17.6

Mahalanobis Distance p-value: 1.1e-012

Prediction: Positive if the Bayesian score is above the estimated best cutoff value from minimizing the false positive and false negative rate.

Probability: The estimated probability that the sample is in the positive category. This assumes that the Bayesian score follows a normal distribution and is different from the prediction using a cutoff.

Enrichment: An estimate of enrichment, that is, the increased likelihood (versus random) of this sample being in the category.

Bayesian Score: The standard Laplacian-modified Bayesian score.

Mahalanobis Distance: The Mahalanobis distance (MD) is the distance to the center of the training data. The larger the MD, the less trustworthy the prediction.

Mahalanobis Distance p-value: The p-value gives the fraction of training data with an MD greater than or equal to the one for the given sample, assuming normally distributed data. The smaller the p-value, the less trustworthy the prediction. For highly non-normal X properties (e.g., fingerprints), the MD p-value is wildly inaccurate.

## Structural Similar Compounds

| Name               | Glyburide                                                                           | Glimepiride                                                                         | Fluvastatin                                                                         |
|--------------------|-------------------------------------------------------------------------------------|-------------------------------------------------------------------------------------|-------------------------------------------------------------------------------------|
| Structure          | 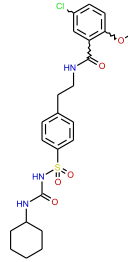 |  |  |
| Actual Endpoint    | Non-Carcinogen                                                                      | Non-Carcinogen                                                                      | Carcinogen                                                                          |
| Predicted Endpoint | Non-Carcinogen                                                                      | Non-Carcinogen                                                                      | Carcinogen                                                                          |
| Distance           | 0.593                                                                               | 0.600                                                                               | 0.615                                                                               |
| Reference          | US FDA (Centre for Drug Eval.& Res./Off. Testing & Res.) Sept. 1997                 | US FDA (Centre for Drug Eval.& Res./Off. Testing & Res.) Sept. 1997                 | US FDA (Centre for Drug Eval.& Res./Off. Testing & Res.) Sept. 1997                 |

## Model Applicability

Unknown features are fingerprint features in the query molecule, but not found or appearing too infrequently in the training set.

1. All properties and OPS components are within expected ranges.

## Feature Contribution

### Top features for positive contribution

| Fingerprint | Bit/Smiles | Feature Structure                                                                                                                                    | Score | Carcinogen in training set |
|-------------|------------|------------------------------------------------------------------------------------------------------------------------------------------------------|-------|----------------------------|
| SCFP_6      | 347048986  | 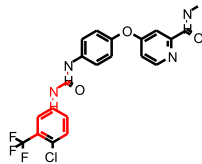<br><chem>[*]C(=[*])N[c]1:[cH]:[cH]:[*]:[cH]:[cH]:[cH]:1</chem> | 0.615 | 5 out of 7                 |

|                                               |                   |                                                                                                                                                                   |              |                                   |
|-----------------------------------------------|-------------------|-------------------------------------------------------------------------------------------------------------------------------------------------------------------|--------------|-----------------------------------|
| SCFP_6                                        | -754059116        | 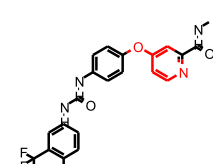<br><chem>[*]O[c]1:[cH]:[*]:n:[cH]:[cH]:1</chem>                                | 0.415        | 1 out of 1                        |
| SCFP_6                                        | -347281112        | <br><chem>[*]N(c)1:[cH]:[*]:[c]([*]):[c](:[cH]:1)C([*])([*])[*]</chem>         | 0.273        | 2 out of 4                        |
| <b>Top Features for negative contribution</b> |                   |                                                                                                                                                                   |              |                                   |
| <b>Fingerprint</b>                            | <b>Bit/Smiles</b> | <b>Feature Structure</b>                                                                                                                                          | <b>Score</b> | <b>Carcinogen in training set</b> |
| SCFP_6                                        | -827073191        | <br><chem>[*]C(=[*])[c]1:[cH]:[*]:[cH]:[cH]:[cH]:n:1</chem>                    | -0.674       | 0 out of 3                        |
| SCFP_6                                        | -488587948        | <br><chem>[*]-[c]([*])O[c]1:[cH]:[cH]:[*]:[cH]:[cH]:1</chem>                  | -0.496       | 0 out of 2                        |
| SCFP_6                                        | -975241316        | <br><chem>[*][c]1:[cH]:[cH]:[c](O[c](:[cH]:[*]):[cH]:[*]):[cH]:[cH]:1</chem> | -0.496       | 0 out of 2                        |



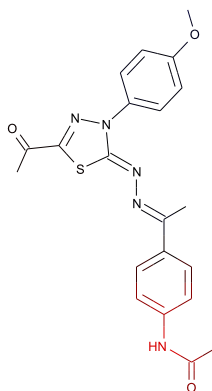

$C_{21}H_{21}N_5O_3S$

Molecular Weight: 423.48813

ALogP: 3.064

Rotatable Bonds: 6

Acceptors: 8

Donors: 1

## Model Prediction

**Prediction: Multiple-Carcinogen**

Probability: 0.562

Enrichment: 1.36

Bayesian Score: 2.95

Mahalanobis Distance: 17.1

Mahalanobis Distance p-value: 1.38e-007

Prediction: Positive if the Bayesian score is above the estimated best cutoff value from minimizing the false positive and false negative rate.

Probability: The estimated probability that the sample is in the positive category. This assumes that the Bayesian score follows a normal distribution and is different from the prediction using a cutoff.

Enrichment: An estimate of enrichment, that is, the increased likelihood (versus random) of this sample being in the category.

Bayesian Score: The standard Laplacian-modified Bayesian score.

Mahalanobis Distance: The Mahalanobis distance (MD) is the distance to the center of the training data. The larger the MD, the less trustworthy the prediction.

Mahalanobis Distance p-value: The p-value gives the fraction of training data with an MD greater than or equal to the one for the given sample, assuming normally distributed data. The smaller the p-value, the less trustworthy the prediction. For highly non-normal X properties (e.g., fingerprints), the MD p-value is wildly inaccurate.

## Structural Similar Compounds

| Name               | Isradipine                                                          | Moricizine                                                          | Terazosin                                                           |
|--------------------|---------------------------------------------------------------------|---------------------------------------------------------------------|---------------------------------------------------------------------|
| Structure          |                                                                     |                                                                     |                                                                     |
| Actual Endpoint    | Single-Carcinogen                                                   | Single-Carcinogen                                                   | Single-Carcinogen                                                   |
| Predicted Endpoint | Single-Carcinogen                                                   | Single-Carcinogen                                                   | Single-Carcinogen                                                   |
| Distance           | 0.629                                                               | 0.650                                                               | 0.681                                                               |
| Reference          | US FDA (Centre for Drug Eval.& Res./Off. Testing & Res.) Sept. 1997 | US FDA (Centre for Drug Eval.& Res./Off. Testing & Res.) Sept. 1997 | US FDA (Centre for Drug Eval.& Res./Off. Testing & Res.) Sept. 1997 |

## Model Applicability

Unknown features are fingerprint features in the query molecule, but not found or appearing too infrequently in the training set.

- OPS PC4 out of range. Value: 5.2707. Training min, max, SD, explained variance: -6.1092, 5.1042, 2.173, 0.0642.

## Feature Contribution

### Top features for positive contribution

| Fingerprint | Bit/Smiles | Feature Structure                  | Score | Multiple-Carcinogen in training set |
|-------------|------------|------------------------------------|-------|-------------------------------------|
| SCFP_8      | 2097618059 | <br>[*]:[cH]:[c](NC(=O)C):[cH]:[*] | 0.681 | 6 out of 7                          |

|                                               |                   |                                                                                                                                          |              |                                            |
|-----------------------------------------------|-------------------|------------------------------------------------------------------------------------------------------------------------------------------|--------------|--------------------------------------------|
| SCFP_8                                        | -347048986        | 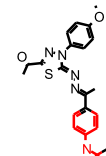<br>[*]C(=[*])N[c]1:[cH]:<br>[cH]:[*]:[cH]:[cH]:1     | 0.574        | 4 out of 5                                 |
| SCFP_8                                        | 814408713         | <br>[*]c1:[cH]:[cH]:[c]:<br>(NC(=O)C):[cH]:[cH]:<br>1 | 0.553        | 2 out of 2                                 |
| <b>Top Features for negative contribution</b> |                   |                                                                                                                                          |              |                                            |
| <b>Fingerprint</b>                            | <b>Bit/Smiles</b> | <b>Feature Structure</b>                                                                                                                 | <b>Score</b> | <b>Multiple-Carcinogen in training set</b> |
| SCFP_8                                        | 136627117         | <br>[*]C(=[*])C                                       | -0.41        | 4 out of 18                                |
| SCFP_8                                        | 136239834         | <br>[*]OC                                           | -0.358       | 3 out of 13                                |
| SCFP_8                                        | 1287669168        | <br>[*]c1:[cH]:[cH]:[c]:<br>(OC):[cH]:[cH]:1        | -0.31        | 0 out of 1                                 |



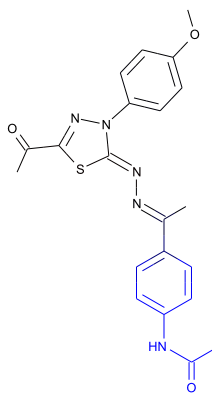

$C_{21}H_{21}N_5O_3S$

Molecular Weight: 423.48813

ALogP: 3.064

Rotatable Bonds: 6

Acceptors: 8

Donors: 1

## Model Prediction

Prediction: Non-Irritant

Probability: 6.57e-005

Enrichment: 7.14e-005

Bayesian Score: -9.11

Mahalanobis Distance: 9.91

Mahalanobis Distance p-value: 0.0783

Prediction: Positive if the Bayesian score is above the estimated best cutoff value from minimizing the false positive and false negative rate.

Probability: The estimated probability that the sample is in the positive category. This assumes that the Bayesian score follows a normal distribution and is different from the prediction using a cutoff.

Enrichment: An estimate of enrichment, that is, the increased likelihood (versus random) of this sample being in the category.

Bayesian Score: The standard Laplacian-modified Bayesian score.

Mahalanobis Distance: The Mahalanobis distance (MD) is the distance to the center of the training data. The larger the MD, the less trustworthy the prediction.

Mahalanobis Distance p-value: The p-value gives the fraction of training data with an MD greater than or equal to the one for the given sample, assuming normally distributed data. The smaller the p-value, the less trustworthy the prediction. For highly non-normal X properties (e.g., fingerprints), the MD p-value is wildly inaccurate.

## Structural Similar Compounds

| Name               | Pregna-1,4-diene-3,20-dione, 21-(acetyloxy)-11-hydroxy-6-methyl-17-(1-oxopropoxy)-, (6-alpha,11-beta)-                                                                           | 2-Anthracenesulfonic acid, 1-amino-9,10-dihydro-9,10-dioxo-4-(2,4,6-trimethylanilino)-, monosodium salt                                            | Butanedioic acid, sulfo-, 1,4-dicyclohexyl ester, sodium salt                                                                                                                                    |
|--------------------|----------------------------------------------------------------------------------------------------------------------------------------------------------------------------------|----------------------------------------------------------------------------------------------------------------------------------------------------|--------------------------------------------------------------------------------------------------------------------------------------------------------------------------------------------------|
| Structure          |                                                                                                                                                                                  |                                                                                                                                                    |                                                                                                                                                                                                  |
| Actual Endpoint    | Irritant                                                                                                                                                                         | Irritant                                                                                                                                           | Irritant                                                                                                                                                                                         |
| Predicted Endpoint | Irritant                                                                                                                                                                         | Non-Irritant                                                                                                                                       | Irritant                                                                                                                                                                                         |
| Distance           | 0.643                                                                                                                                                                            | 0.768                                                                                                                                              | 0.808                                                                                                                                                                                            |
| Reference          | YACHDS Yakuri to Chiryō. Pharmacology and Therapeutics. (Raifu Saiensu Shup pan K.K., 2-5-13, Yaesu, Chuo-ku, Tokyo 104, Japan) V.1-1972- Volume(issue) /page/year: 19,3103,1991 | 85JCAE "Prehled Prumyslove Toxikologie; Organicke Latky," Marhold, J., Prague, Czechoslovakia, Avicenum, 1986 Volume(issue)/page/year: -,1327,1986 | ATDAEI Acute Toxicity Data. Journal of the American College of Toxicology, Pa rt B. (Mary Ann Liebert, Inc., 1651 Third Ave., New York, NY 10128) V.1- 1990- Volume(issue)/page/year: 1,108,1990 |

## Model Applicability

Unknown features are fingerprint features in the query molecule, but not found or appearing too infrequently in the training set.

1. All properties and OPS components are within expected ranges.

## Feature Contribution

### Top features for positive contribution

| Fingerprint | Bit/Smiles | Feature Structure | Score | Irritant in training set |
|-------------|------------|-------------------|-------|--------------------------|
|             |            |                   |       |                          |

|                                               |                   |                                                                                                                                                                                    |              |                                 |
|-----------------------------------------------|-------------------|------------------------------------------------------------------------------------------------------------------------------------------------------------------------------------|--------------|---------------------------------|
| FCFP_12                                       | -1986158408       | 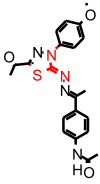<br><chem>[*]N=C1/S[*]=[*]N1[</chem>                                                            | 0.0821       | 13 out of 13                    |
| FCFP_12                                       | 565968762         | <br><chem>[*]C(=[*])C(=O)C</chem>                                                               | 0.075        | 78 out of 79                    |
| FCFP_12                                       | 356782498         | <br><chem>[*]N([*])[c]1:[cH][H]O</chem><br><chem>H]:[c](OC):[cH]:[cH]</chem><br><chem>:1</chem> | 0.0583       | 2 out of 2                      |
| <b>Top Features for negative contribution</b> |                   |                                                                                                                                                                                    |              |                                 |
| <b>Fingerprint</b>                            | <b>Bit/Smiles</b> | <b>Feature Structure</b>                                                                                                                                                           | <b>Score</b> | <b>Irritant in training set</b> |
| FCFP_12                                       | -1944671191       | <br><chem>[*]:[c](:[*])NC(=O)C</chem>                                                          | -1.87        | 0 out of 6                      |
| FCFP_12                                       | 1907952166        | <br><chem>CC(=O)N[c]1:[cH]:[cH]</chem><br><chem>:[*]:[cH]:[cH]:1</chem>                       | -1.72        | 0 out of 5                      |

|         |            |                                                                                                                                                              |       |            |
|---------|------------|--------------------------------------------------------------------------------------------------------------------------------------------------------------|-------|------------|
| FCFP_12 | 1175665944 | 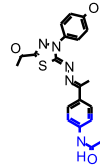 <p data-bbox="1255 289 1386 328">[*];[cH];[c](NC(=O)C)<br/>:[cH];[*]</p> | -1.02 | 2 out of 8 |
|---------|------------|--------------------------------------------------------------------------------------------------------------------------------------------------------------|-------|------------|

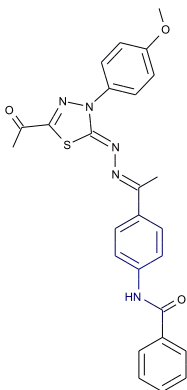

$C_{26}H_{23}N_5O_3S$

Molecular Weight: 485.55751

ALogP: 4.728

Rotatable Bonds: 7

Acceptors: 8

Donors: 1

## Model Prediction

Prediction: Non-Irritant

Probability: 0.898

Enrichment: 0.975

Bayesian Score: -2.78

Mahalanobis Distance: 10.2

Mahalanobis Distance p-value: 0.0322

Prediction: Positive if the Bayesian score is above the estimated best cutoff value from minimizing the false positive and false negative rate.

Probability: The estimated probability that the sample is in the positive category. This assumes that the Bayesian score follows a normal distribution and is different from the prediction using a cutoff.

Enrichment: An estimate of enrichment, that is, the increased likelihood (versus random) of this sample being in the category.

Bayesian Score: The standard Laplacian-modified Bayesian score.

Mahalanobis Distance: The Mahalanobis distance (MD) is the distance to the center of the training data. The larger the MD, the less trustworthy the prediction.

Mahalanobis Distance p-value: The p-value gives the fraction of training data with an MD greater than or equal to the one for the given sample, assuming normally distributed data. The smaller the p-value, the less trustworthy the prediction. For highly non-normal X properties (e.g., fingerprints), the MD p-value is wildly inaccurate.

## Structural Similar Compounds

| Name               | Pregna-1,4-diene-3,20-dione, 21-(acetyloxy)-11-hydroxy-6-methyl-17-(1-oxopropoxy)-, (6-alpha,11-beta)-                                                                          | Benzenesulfonic acid, 2,2'-(4,4'-biphenylenedivinylene)d i-, disodium salt                                | 2-Anthracenesulfonic acid, 1-amino-9,10-dihydro-9,10-dioxo-4-(2,4,6-trimethylanilino)-, monosodium salt                                            |
|--------------------|---------------------------------------------------------------------------------------------------------------------------------------------------------------------------------|-----------------------------------------------------------------------------------------------------------|----------------------------------------------------------------------------------------------------------------------------------------------------|
| Structure          |                                                                                                                                                                                 |                                                                                                           |                                                                                                                                                    |
| Actual Endpoint    | Irritant                                                                                                                                                                        | Irritant                                                                                                  | Irritant                                                                                                                                           |
| Predicted Endpoint | Irritant                                                                                                                                                                        | Non-Irritant                                                                                              | Non-Irritant                                                                                                                                       |
| Distance           | 0.778                                                                                                                                                                           | 0.780                                                                                                     | 0.878                                                                                                                                              |
| Reference          | YACHDS Yakuri to Chiryō. Pharmacology and Therapeutics. (Raifu Saiensu Shup pan K.K., 2-5-13, Yaesu, Chuo-ku, Tokyo 104, Japan) V.1-1972- Volume(issue)/page/year: 19,3103,1991 | MVCRB3 MVC-Report. (Stockholm, Sweden) No.1-2, 1972-73. Discontinued. Volume(issue)/page/year: 2,193,1973 | 85JCAE "Prehled Prumyslove Toxikologie; Organické Latky," Marhold, J., Prague, Czechoslovakia, Avicenum, 1986 Volume(issue)/page/year: -,1327,1986 |

## Model Applicability

Unknown features are fingerprint features in the query molecule, but not found or appearing too infrequently in the training set.

- All properties and OPS components are within expected ranges.

## Feature Contribution

### Top features for positive contribution

| Fingerprint | Bit/Smiles | Feature Structure | Score | Irritant in training set |
|-------------|------------|-------------------|-------|--------------------------|
|             |            |                   |       |                          |

|                                               |                   |                                                                                                                                       |              |                                 |
|-----------------------------------------------|-------------------|---------------------------------------------------------------------------------------------------------------------------------------|--------------|---------------------------------|
| FCFP_12                                       | -1986158408       | 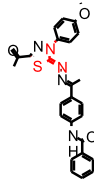<br>[*]N=C1/S[*]=[[*]N1[<br>]                      | 0.0821       | 13 out of 13                    |
| FCFP_12                                       | 565968762         | <br>[*]C(=[*])C(=O)C                               | 0.075        | 78 out of 79                    |
| FCFP_12                                       | -1549103449       | <br>[*]NC(=O)[c]([*]):<br>]                        | 0.0734       | 5 out of 5                      |
| <b>Top Features for negative contribution</b> |                   |                                                                                                                                       |              |                                 |
| <b>Fingerprint</b>                            | <b>Bit/Smiles</b> | <b>Feature Structure</b>                                                                                                              | <b>Score</b> | <b>Irritant in training set</b> |
| FCFP_12                                       | -1838187238       | <br>[*]C(=[*])N[c]1:[cH]:<br>[cH]:[*]:[cH]:[cH]:1 | -0.692       | 5 out of 12                     |
| FCFP_12                                       | 1294255210        | <br>[*]C(=[*])N[c]([*]):<br>[*]                  | -0.486       | 12 out of 22                    |



|         |            |                                                                                                                                   |        |              |
|---------|------------|-----------------------------------------------------------------------------------------------------------------------------------|--------|--------------|
| FCFP_12 | -773983804 | 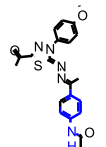<br>[*]N[c]1:[cH]:[ ]:[c]<br>([*]):[cH]:[cH]:1 | -0.444 | 46 out of 79 |
|---------|------------|-----------------------------------------------------------------------------------------------------------------------------------|--------|--------------|

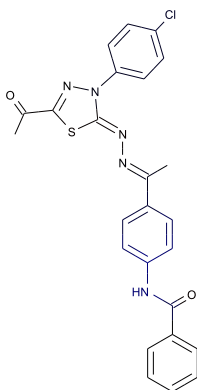

C<sub>25</sub>H<sub>20</sub>ClN<sub>5</sub>O<sub>2</sub>S

Molecular Weight: 489.97659

ALogP: 5.409

Rotatable Bonds: 6

Acceptors: 7

Donors: 1

## Model Prediction

Prediction: Non-Irritant

Probability: 0.816

Enrichment: 0.886

Bayesian Score: -3.42

Mahalanobis Distance: 10.7

Mahalanobis Distance p-value: 0.00706

Prediction: Positive if the Bayesian score is above the estimated best cutoff value from minimizing the false positive and false negative rate.

Probability: The estimated probability that the sample is in the positive category. This assumes that the Bayesian score follows a normal distribution and is different from the prediction using a cutoff.

Enrichment: An estimate of enrichment, that is, the increased likelihood (versus random) of this sample being in the category.

Bayesian Score: The standard Laplacian-modified Bayesian score.

Mahalanobis Distance: The Mahalanobis distance (MD) is the distance to the center of the training data. The larger the MD, the less trustworthy the prediction.

Mahalanobis Distance p-value: The p-value gives the fraction of training data with an MD greater than or equal to the one for the given sample, assuming normally distributed data. The smaller the p-value, the less trustworthy the prediction. For highly non-normal X properties (e.g., fingerprints), the MD p-value is wildly inaccurate.

## Structural Similar Compounds

| Name               | Benzenesulfonic acid, 2,2'-(4,4'-biphenylylene)divinylene) di-, disodium salt                             | Anthraquinone, 1,1'-iminodi-                                                                                                                      | Pregna-1,4-diene-3,20-dione, 21-(acetyloxy)-11-hydroxy-6-methyl-17-(1-oxopropoxy)-, (6- $\alpha$ ,11- $\beta$ )-                                                               |
|--------------------|-----------------------------------------------------------------------------------------------------------|---------------------------------------------------------------------------------------------------------------------------------------------------|--------------------------------------------------------------------------------------------------------------------------------------------------------------------------------|
| Structure          |                                                                                                           |                                                                                                                                                   |                                                                                                                                                                                |
| Actual Endpoint    | Irritant                                                                                                  | Irritant                                                                                                                                          | Irritant                                                                                                                                                                       |
| Predicted Endpoint | Non-Irritant                                                                                              | Non-Irritant                                                                                                                                      | Irritant                                                                                                                                                                       |
| Distance           | 0.721                                                                                                     | 0.796                                                                                                                                             | 0.817                                                                                                                                                                          |
| Reference          | MVCRB3 MVC-Report. (Stockholm, Sweden) No.1-2, 1972-73. Discontinued. Volume(issue)/page/year: 2,193,1973 | 85JCAE "Prehled Prumyslove Toxikologie; Organické Latky," Marhold, J., Prague, Czechoslovakia, Avicenum, 1986 Volume(issue)/page/year: -,735,1986 | YACHDS Yakuri to Chiryō. Pharmacology and Therapeutics. (Raifu Saiensu Shuppan K.K., 2-5-13, Yaesu, Chuo-ku, Tokyo 104, Japan) V.1-1972- Volume(issue)/page/year: 19,3103,1991 |

## Model Applicability

Unknown features are fingerprint features in the query molecule, but not found or appearing too infrequently in the training set.

- All properties and OPS components are within expected ranges.

## Feature Contribution

### Top features for positive contribution

| Fingerprint | Bit/Smiles | Feature Structure | Score | Irritant in training set |
|-------------|------------|-------------------|-------|--------------------------|
|             |            |                   |       |                          |

|                                               |                   |                                                                                                                                       |              |                                 |
|-----------------------------------------------|-------------------|---------------------------------------------------------------------------------------------------------------------------------------|--------------|---------------------------------|
| FCFP_12                                       | -1986158408       | 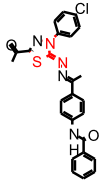<br>[*]N=C1/S[*]=[*]N1[<br>]                       | 0.0821       | 13 out of 13                    |
| FCFP_12                                       | 565968762         | <br>[*]C(=[*])C(=O)C                               | 0.075        | 78 out of 79                    |
| FCFP_12                                       | -1549103449       | <br>[*]NC(=O)[c](:[*]):[<br>]                      | 0.0734       | 5 out of 5                      |
| <b>Top Features for negative contribution</b> |                   |                                                                                                                                       |              |                                 |
| <b>Fingerprint</b>                            | <b>Bit/Smiles</b> | <b>Feature Structure</b>                                                                                                              | <b>Score</b> | <b>Irritant in training set</b> |
| FCFP_12                                       | -1838187238       | <br>[*]C(=[*])N[c]1:[cH]:<br>[cH]:[*]:[cH]:[cH]:1 | -0.692       | 5 out of 12                     |
| FCFP_12                                       | 1294255210        | <br>[*]C(=[*])N[c](:[*]):<br>[*]                 | -0.486       | 12 out of 22                    |

|         |            |                                                                                                                                                                                   |        |              |
|---------|------------|-----------------------------------------------------------------------------------------------------------------------------------------------------------------------------------|--------|--------------|
| FCFP_12 | -773983804 | 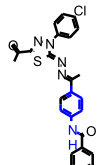<br><chem>*Nc1ccc(cc1)N2C(=O)NC3=CC=CC=C32</chem><br>[*]N[c]1:[cH]:[*]:[c]<br>([*]:[cH]:[cH]:1 | -0.444 | 46 out of 79 |
|---------|------------|-----------------------------------------------------------------------------------------------------------------------------------------------------------------------------------|--------|--------------|

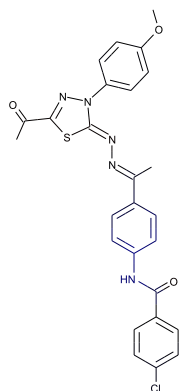

$C_{26}H_{22}ClN_5O_3S$

Molecular Weight: 520.00258

ALogP: 5.392

Rotatable Bonds: 7

Acceptors: 8

Donors: 1

## Model Prediction

Prediction: Non-Irritant

Probability: 0.873

Enrichment: 0.948

Bayesian Score: -3.02

Mahalanobis Distance: 10.8

Mahalanobis Distance p-value: 0.00565

Prediction: Positive if the Bayesian score is above the estimated best cutoff value from minimizing the false positive and false negative rate.

Probability: The estimated probability that the sample is in the positive category. This assumes that the Bayesian score follows a normal distribution and is different from the prediction using a cutoff.

Enrichment: An estimate of enrichment, that is, the increased likelihood (versus random) of this sample being in the category.

Bayesian Score: The standard Laplacian-modified Bayesian score.

Mahalanobis Distance: The Mahalanobis distance (MD) is the distance to the center of the training data. The larger the MD, the less trustworthy the prediction.

Mahalanobis Distance p-value: The p-value gives the fraction of training data with an MD greater than or equal to the one for the given sample, assuming normally distributed data. The smaller the p-value, the less trustworthy the prediction. For highly non-normal X properties (e.g., fingerprints), the MD p-value is wildly inaccurate.

## Structural Similar Compounds

| Name               | Benzenesulfonic acid, 2,2'-(4,4'-biphenylylene)d i-, disodium salt                                        | Pregna-1,4-diene-3,20-dione, 21-(acetyloxy)-11-hydroxy-6-methyl-17-(1-oxopropoxy)-, (6- $\alpha$ ,11- $\beta$ )-                                                                 | Anthraquinone, 1,1'-iminodi-                                                                                                                      |
|--------------------|-----------------------------------------------------------------------------------------------------------|----------------------------------------------------------------------------------------------------------------------------------------------------------------------------------|---------------------------------------------------------------------------------------------------------------------------------------------------|
| Structure          |                                                                                                           |                                                                                                                                                                                  |                                                                                                                                                   |
| Actual Endpoint    | Irritant                                                                                                  | Irritant                                                                                                                                                                         | Irritant                                                                                                                                          |
| Predicted Endpoint | Non-Irritant                                                                                              | Irritant                                                                                                                                                                         | Non-Irritant                                                                                                                                      |
| Distance           | 0.764                                                                                                     | 0.860                                                                                                                                                                            | 0.935                                                                                                                                             |
| Reference          | MVCRB3 MVC-Report. (Stockholm, Sweden) No.1-2, 1972-73. Discontinued. Volume(issue)/page/year: 2,193,1973 | YACHDS Yakuri to Chiryō. Pharmacology and Therapeutics. (Raifu Saiensu Shup pan K.K., 2-5-13, Yaesu, Chuo-ku, Tokyo 104, Japan) V.1-1972- Volume(issue) /page/year: 19,3103,1991 | 85JCAE "Prehled Prumyslove Toxikologie; Organické Latky," Marhold, J., Prague, Czechoslovakia, Avicenum, 1986 Volume(issue)/page/year: -,735,1986 |

## Model Applicability

Unknown features are fingerprint features in the query molecule, but not found or appearing too infrequently in the training set.

- All properties and OPS components are within expected ranges.

## Feature Contribution

### Top features for positive contribution

| Fingerprint | Bit/Smiles | Feature Structure | Score | Irritant in training set |
|-------------|------------|-------------------|-------|--------------------------|
|             |            |                   |       |                          |

|                                               |                   |                                                                                                                                       |              |                                 |
|-----------------------------------------------|-------------------|---------------------------------------------------------------------------------------------------------------------------------------|--------------|---------------------------------|
| FCFP_12                                       | -1986158408       | 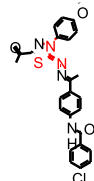<br>[*]N=C1/S[*]=[[*]N1<br>]                       | 0.0821       | 13 out of 13                    |
| FCFP_12                                       | 565968762         | <br>[*]C(=[*])C(=O)C                               | 0.075        | 78 out of 79                    |
| FCFP_12                                       | -1549103449       | <br>[*]NC(=O)[c](:[*])[*]<br>]                     | 0.0734       | 5 out of 5                      |
| <b>Top Features for negative contribution</b> |                   |                                                                                                                                       |              |                                 |
| <b>Fingerprint</b>                            | <b>Bit/Smiles</b> | <b>Feature Structure</b>                                                                                                              | <b>Score</b> | <b>Irritant in training set</b> |
| FCFP_12                                       | -1838187238       | <br>[*]C(=[*])N[c]1:[cH]:<br>[cH]:[*]:[cH]:[cH]:1 | -0.692       | 5 out of 12                     |
| FCFP_12                                       | 1294255210        | <br>[*]C(=[*])N[c](:[*])<br>[*]                  | -0.486       | 12 out of 22                    |

|         |            |                                                                                                                                   |        |              |
|---------|------------|-----------------------------------------------------------------------------------------------------------------------------------|--------|--------------|
| FCFP_12 | -773983804 | 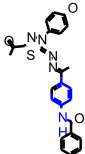<br>[*]N[c]1:[cH]:[*]:[c]<br>([*]):[cH]:[cH]:1 | -0.444 | 46 out of 79 |
|---------|------------|-----------------------------------------------------------------------------------------------------------------------------------|--------|--------------|

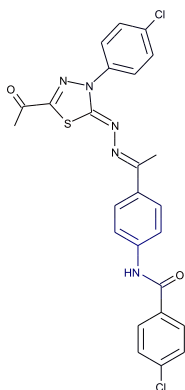

C<sub>25</sub>H<sub>19</sub>Cl<sub>2</sub>N<sub>5</sub>O<sub>2</sub>S

Molecular Weight: 524.42166

ALogP: 6.073

Rotatable Bonds: 6

Acceptors: 7

Donors: 1

## Model Prediction

Prediction: Non-Irritant

Probability: 0.84

Enrichment: 0.912

Bayesian Score: -3.27

Mahalanobis Distance: 10.9

Mahalanobis Distance p-value: 0.00383

Prediction: Positive if the Bayesian score is above the estimated best cutoff value from minimizing the false positive and false negative rate.

Probability: The estimated probability that the sample is in the positive category. This assumes that the Bayesian score follows a normal distribution and is different from the prediction using a cutoff.

Enrichment: An estimate of enrichment, that is, the increased likelihood (versus random) of this sample being in the category.

Bayesian Score: The standard Laplacian-modified Bayesian score.

Mahalanobis Distance: The Mahalanobis distance (MD) is the distance to the center of the training data. The larger the MD, the less trustworthy the prediction.

Mahalanobis Distance p-value: The p-value gives the fraction of training data with an MD greater than or equal to the one for the given sample, assuming normally distributed data. The smaller the p-value, the less trustworthy the prediction. For highly non-normal X properties (e.g., fingerprints), the MD p-value is wildly inaccurate.

## Structural Similar Compounds

| Name               | Benzenesulfonic acid, 2,2'-(4,4'-biphenylylene)d i-, disodium salt                                        | Anthraquinone, 1,1'-iminodi-                                                                                                                      | Pregna-1,4-diene-3,20-dione, 21-(acetyloxy)-11-hydroxy-6-methyl-17- (1-oxopropoxy)-, (6- $\alpha$ ,11- $\beta$ )-                                                                |
|--------------------|-----------------------------------------------------------------------------------------------------------|---------------------------------------------------------------------------------------------------------------------------------------------------|----------------------------------------------------------------------------------------------------------------------------------------------------------------------------------|
| Structure          |                                                                                                           |                                                                                                                                                   |                                                                                                                                                                                  |
| Actual Endpoint    | Irritant                                                                                                  | Irritant                                                                                                                                          | Irritant                                                                                                                                                                         |
| Predicted Endpoint | Non-Irritant                                                                                              | Non-Irritant                                                                                                                                      | Irritant                                                                                                                                                                         |
| Distance           | 0.719                                                                                                     | 0.842                                                                                                                                             | 0.903                                                                                                                                                                            |
| Reference          | MVCRB3 MVC-Report. (Stockholm, Sweden) No.1-2, 1972-73. Discontinued. Volume(issue)/page/year: 2,193,1973 | 85JCAE "Prehled Prumyslove Toxikologie; Organické Latky," Marhold, J., Prague, Czechoslovakia, Avicenum, 1986 Volume(issue)/page/year: -,735,1986 | YACHDS Yakuri to Chiryō. Pharmacology and Therapeutics. (Raifu Saiensu Shup pan K.K., 2-5-13, Yaesu, Chuo-ku, Tokyo 104, Japan) V.1-1972- Volume(issue) /page/year: 19,3103,1991 |

## Model Applicability

Unknown features are fingerprint features in the query molecule, but not found or appearing too infrequently in the training set.

- All properties and OPS components are within expected ranges.

## Feature Contribution

### Top features for positive contribution

| Fingerprint | Bit/Smiles | Feature Structure | Score | Irritant in training set |
|-------------|------------|-------------------|-------|--------------------------|
|             |            |                   |       |                          |



|                                               |                   |                                                                                                                                       |              |                                 |
|-----------------------------------------------|-------------------|---------------------------------------------------------------------------------------------------------------------------------------|--------------|---------------------------------|
| FCFP_12                                       | -1986158408       | 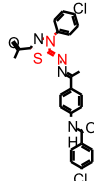<br>[*]N=C1/S[*]=[*]N1<br>]                        | 0.0821       | 13 out of 13                    |
| FCFP_12                                       | 565968762         | <br>[*]C(=[*])C(=O)C                               | 0.075        | 78 out of 79                    |
| FCFP_12                                       | -1549103449       | <br>[*]NC(=O)[c](:[*])[*]<br>]                     | 0.0734       | 5 out of 5                      |
| <b>Top Features for negative contribution</b> |                   |                                                                                                                                       |              |                                 |
| <b>Fingerprint</b>                            | <b>Bit/Smiles</b> | <b>Feature Structure</b>                                                                                                              | <b>Score</b> | <b>Irritant in training set</b> |
| FCFP_12                                       | -1838187238       | <br>[*]C(=[*])N[c]1:[cP]:<br>[cH]:[*]:[cH]:[cH]:1 | -0.692       | 5 out of 12                     |
| FCFP_12                                       | 1294255210        | <br>[*]C(=[*])N[c](:[*])<br>[*]                  | -0.486       | 12 out of 22                    |

|         |            |                                                                                                                                                                     |        |              |
|---------|------------|---------------------------------------------------------------------------------------------------------------------------------------------------------------------|--------|--------------|
| FCFP_12 | -773983804 | 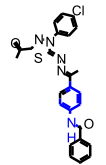 <p data-bbox="1260 276 1428 324">[*]N[c]1:[cH]:[*]:[c]<br/>([*]:[cH]:[cH]:1</p> | -0.444 | 46 out of 79 |
|---------|------------|---------------------------------------------------------------------------------------------------------------------------------------------------------------------|--------|--------------|

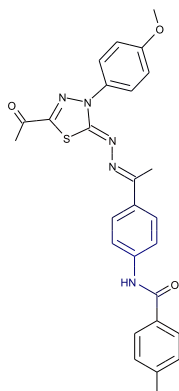

$C_{27}H_{25}N_5O_3S$

Molecular Weight: 499.58409

ALogP: 5.214

Rotatable Bonds: 7

Acceptors: 8

Donors: 1

## Model Prediction

Prediction: Non-Irritant

Probability: 0.91

Enrichment: 0.988

Bayesian Score: -2.64

Mahalanobis Distance: 10.4

Mahalanobis Distance p-value: 0.021

Prediction: Positive if the Bayesian score is above the estimated best cutoff value from minimizing the false positive and false negative rate.

Probability: The estimated probability that the sample is in the positive category. This assumes that the Bayesian score follows a normal distribution and is different from the prediction using a cutoff.

Enrichment: An estimate of enrichment, that is, the increased likelihood (versus random) of this sample being in the category.

Bayesian Score: The standard Laplacian-modified Bayesian score.

Mahalanobis Distance: The Mahalanobis distance (MD) is the distance to the center of the training data. The larger the MD, the less trustworthy the prediction.

Mahalanobis Distance p-value: The p-value gives the fraction of training data with an MD greater than or equal to the one for the given sample, assuming normally distributed data. The smaller the p-value, the less trustworthy the prediction. For highly non-normal X properties (e.g., fingerprints), the MD p-value is wildly inaccurate.

## Structural Similar Compounds

| Name               | Benzenesulfonic acid, 2,2'-(4,4'-biphenylylene)d i-, disodium salt                                        | Pregna-1,4-diene-3,20-dione, 21-(acetyloxy)-11-hydroxy-6-methyl-17- (1-oxopropoxy)-, (6- $\alpha$ ,11- $\beta$ )-                                                                | 2-Anthracenesulfonic acid, 1-amino-9,10-dihydro-9,10-dioxo-4-(2,4,6-trimethylanilino)-, monosodium salt                                            |
|--------------------|-----------------------------------------------------------------------------------------------------------|----------------------------------------------------------------------------------------------------------------------------------------------------------------------------------|----------------------------------------------------------------------------------------------------------------------------------------------------|
| Structure          |                                                                                                           |                                                                                                                                                                                  |                                                                                                                                                    |
| Actual Endpoint    | Irritant                                                                                                  | Irritant                                                                                                                                                                         | Irritant                                                                                                                                           |
| Predicted Endpoint | Non-Irritant                                                                                              | Irritant                                                                                                                                                                         | Non-Irritant                                                                                                                                       |
| Distance           | 0.770                                                                                                     | 0.828                                                                                                                                                                            | 0.917                                                                                                                                              |
| Reference          | MVCRB3 MVC-Report. (Stockholm, Sweden) No.1-2, 1972-73. Discontinued. Volume(issue)/page/year: 2,193,1973 | YACHDS Yakuri to Chiryō. Pharmacology and Therapeutics. (Raifu Saiensu Shup pan K.K., 2-5-13, Yaesu, Chuo-ku, Tokyo 104, Japan) V.1-1972- Volume(issue) /page/year: 19,3103,1991 | 85JCAE "Prehled Prumyslove Toxikologie; Organické Latky," Marhold, J., Prague, Czechoslovakia, Avicenum, 1986 Volume(issue)/page/year: -,1327,1986 |

## Model Applicability

Unknown features are fingerprint features in the query molecule, but not found or appearing too infrequently in the training set.

- All properties and OPS components are within expected ranges.

## Feature Contribution

### Top features for positive contribution

| Fingerprint | Bit/Smiles | Feature Structure | Score | Irritant in training set |
|-------------|------------|-------------------|-------|--------------------------|
|             |            |                   |       |                          |

| FCFP_12                                | -1986158408 | 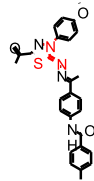<br>[*]N=C1/S[*]=[[*]N1[<br>]                      | 0.0821 | 13 out of 13             |
|----------------------------------------|-------------|---------------------------------------------------------------------------------------------------------------------------------------|--------|--------------------------|
| FCFP_12                                | 565968762   | <br>[*]C(=[*])C(=O)C                               | 0.075  | 78 out of 79             |
| FCFP_12                                | -1549103449 | <br>[*]NC(=O)[c]([*]):[*]:[*]<br>]                 | 0.0734 | 5 out of 5               |
| Top Features for negative contribution |             |                                                                                                                                       |        |                          |
| Fingerprint                            | Bit/Smiles  | Feature Structure                                                                                                                     | Score  | Irritant in training set |
| FCFP_12                                | -1838187238 | <br>[*]C(=[*])N[c]1:[cH]:<br>[cH]:[*]:[cH]:[cH]:1 | -0.692 | 5 out of 12              |
| FCFP_12                                | 1294255210  | <br>[*]C(=[*])N[c]([*]):<br>[*]                  | -0.486 | 12 out of 22             |

|         |            |                                                                                                                                                                      |        |              |
|---------|------------|----------------------------------------------------------------------------------------------------------------------------------------------------------------------|--------|--------------|
| FCFP_12 | -773983804 | 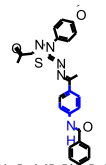 <p data-bbox="1260 267 1438 332">[*]N[c]1:[cH]:[*]:[c]<br/>([*]):[cH]:[cH]:1</p> | -0.444 | 46 out of 79 |
|---------|------------|----------------------------------------------------------------------------------------------------------------------------------------------------------------------|--------|--------------|

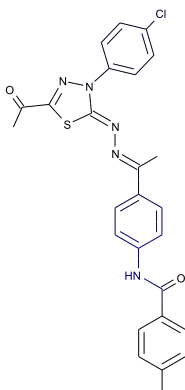

$C_{26}H_{22}ClN_5O_2S$

Molecular Weight: 504.00318

ALogP: 5.895

Rotatable Bonds: 6

Acceptors: 7

Donors: 1

## Model Prediction

Prediction: Non-Irritant

Probability: 0.829

Enrichment: 0.901

Bayesian Score: -3.34

Mahalanobis Distance: 10.8

Mahalanobis Distance p-value: 0.00516

Prediction: Positive if the Bayesian score is above the estimated best cutoff value from minimizing the false positive and false negative rate.

Probability: The estimated probability that the sample is in the positive category. This assumes that the Bayesian score follows a normal distribution and is different from the prediction using a cutoff.

Enrichment: An estimate of enrichment, that is, the increased likelihood (versus random) of this sample being in the category.

Bayesian Score: The standard Laplacian-modified Bayesian score.

Mahalanobis Distance: The Mahalanobis distance (MD) is the distance to the center of the training data. The larger the MD, the less trustworthy the prediction.

Mahalanobis Distance p-value: The p-value gives the fraction of training data with an MD greater than or equal to the one for the given sample, assuming normally distributed data. The smaller the p-value, the less trustworthy the prediction. For highly non-normal X properties (e.g., fingerprints), the MD p-value is wildly inaccurate.

## Structural Similar Compounds

| Name               | Benzenesulfonic acid, 2,2'-(4,4'-biphenylylene)d i-, disod ium salt                                       | Anthraquinone, 1,1'-iminodi-                                                                                                                       | Pregna-1,4-diene-3,20-dione, 21-(acetyloxy)-11-hydroxy-6-methyl-17- (1-oxopropoxy)-, (6- $\alpha$ ,11- $\beta$ )-                                                                |
|--------------------|-----------------------------------------------------------------------------------------------------------|----------------------------------------------------------------------------------------------------------------------------------------------------|----------------------------------------------------------------------------------------------------------------------------------------------------------------------------------|
| Structure          |                                                                                                           |                                                                                                                                                    |                                                                                                                                                                                  |
| Actual Endpoint    | Irritant                                                                                                  | Irritant                                                                                                                                           | Irritant                                                                                                                                                                         |
| Predicted Endpoint | Non-Irritant                                                                                              | Non-Irritant                                                                                                                                       | Irritant                                                                                                                                                                         |
| Distance           | 0.721                                                                                                     | 0.819                                                                                                                                              | 0.871                                                                                                                                                                            |
| Reference          | MVCRB3 MVC-Report. (Stockholm, Sweden) No.1-2, 1972-73. Discontinued. Volume(issue)/page/year: 2,193,1973 | 85JCAE "Prehled Prumyslove Toxikologie; Organické Latky," Marhold, J., Prague , Czechoslovakia, Avicenum, 1986 Volume(issue)/page/year: -,735,1986 | YACHDS Yakuri to Chiryō. Pharmacology and Therapeutics. (Raifu Saiensu Shup pan K.K., 2-5-13, Yaesu, Chuo-ku, Tokyo 104, Japan) V.1-1972- Volume(issue) /page/year: 19,3103,1991 |

## Model Applicability

Unknown features are fingerprint features in the query molecule, but not found or appearing too infrequently in the training set.

- All properties and OPS components are within expected ranges.

## Feature Contribution

### Top features for positive contribution

| Fingerprint | Bit/Smiles | Feature Structure | Score | Irritant in training set |
|-------------|------------|-------------------|-------|--------------------------|
|             |            |                   |       |                          |

|                                               |                   |                                                                                                                                       |              |                                 |
|-----------------------------------------------|-------------------|---------------------------------------------------------------------------------------------------------------------------------------|--------------|---------------------------------|
| FCFP_12                                       | -1986158408       | 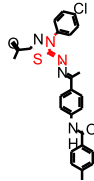<br>[*]N=C1/S[*]=[*]N1[<br>]                       | 0.0821       | 13 out of 13                    |
| FCFP_12                                       | 565968762         | <br>[*]C(=[*])C(=O)C                               | 0.075        | 78 out of 79                    |
| FCFP_12                                       | -1549103449       | <br>[*]NC(=O)[c](:[*]):[*]<br>]                    | 0.0734       | 5 out of 5                      |
| <b>Top Features for negative contribution</b> |                   |                                                                                                                                       |              |                                 |
| <b>Fingerprint</b>                            | <b>Bit/Smiles</b> | <b>Feature Structure</b>                                                                                                              | <b>Score</b> | <b>Irritant in training set</b> |
| FCFP_12                                       | -1838187238       | <br>[*]C(=[*])N[c]1:[cH]:<br>[cH]:[*]:[cH]:[cH]:1 | -0.692       | 5 out of 12                     |
| FCFP_12                                       | 1294255210        | <br>[*]C(=[*])N[c](:[*]):<br>[*]                 | -0.486       | 12 out of 22                    |

|         |            |                                                                                                                                                                     |        |              |
|---------|------------|---------------------------------------------------------------------------------------------------------------------------------------------------------------------|--------|--------------|
| FCFP_12 | -773983804 | 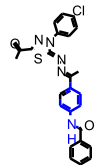 <p data-bbox="1260 276 1428 324">[*]N[c]1:[cH]:[*]:[c]<br/>([*]:[cH]:[cH]:1</p> | -0.444 | 46 out of 79 |
|---------|------------|---------------------------------------------------------------------------------------------------------------------------------------------------------------------|--------|--------------|



# Sorafenib

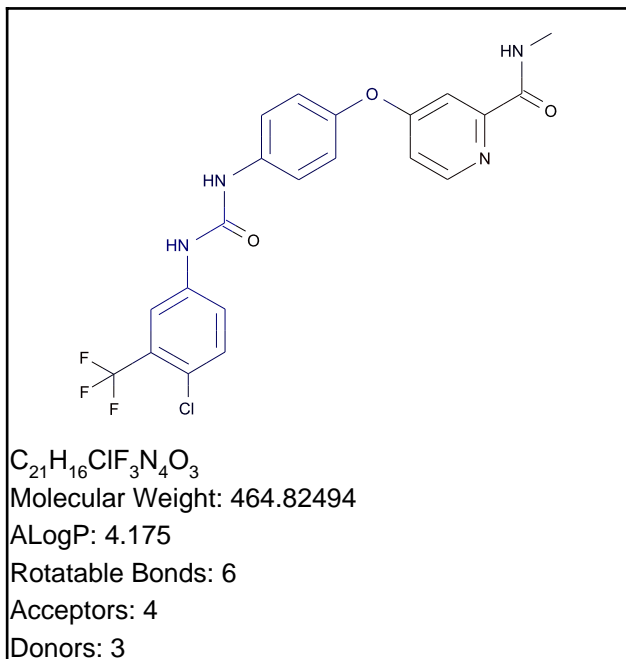

## Model Prediction

Prediction: Non-Irritant

Probability: 0.264

Enrichment: 0.287

Bayesian Score: -5.23

Mahalanobis Distance: 8.27

Mahalanobis Distance p-value: 0.791

Prediction: Positive if the Bayesian score is above the estimated best cutoff value from minimizing the false positive and false negative rate.

Probability: The estimated probability that the sample is in the positive category. This assumes that the Bayesian score follows a normal distribution and is different from the prediction using a cutoff.

Enrichment: An estimate of enrichment, that is, the increased likelihood (versus random) of this sample being in the category.

Bayesian Score: The standard Laplacian-modified Bayesian score.

Mahalanobis Distance: The Mahalanobis distance (MD) is the distance to the center of the training data. The larger the MD, the less trustworthy the prediction.

Mahalanobis Distance p-value: The p-value gives the fraction of training data with an MD greater than or equal to the one for the given sample, assuming normally distributed data. The smaller the p-value, the less trustworthy the prediction. For highly non-normal X properties (e.g., fingerprints), the MD p-value is wildly inaccurate.

# TOPKAT\_Skin\_Irritancy\_None\_vs\_Irritant

## Structural Similar Compounds

| Name               | 5-Norbornene-2,3-dicarboxylic acid, 1,4,5,6,7,7-hexachloro-                                                                                       | Benzenesulfonic acid, 2,2'-(4,4'-biphenylylene)di-, disodium salt                                         | Sulfide, bis(4-t-butyl-m-cresyl)-                                                                                                                                              |
|--------------------|---------------------------------------------------------------------------------------------------------------------------------------------------|-----------------------------------------------------------------------------------------------------------|--------------------------------------------------------------------------------------------------------------------------------------------------------------------------------|
| Structure          | 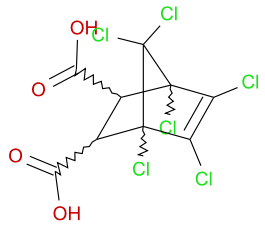                                                               |                        |                                                                                             |
| Actual Endpoint    | Irritant                                                                                                                                          | Irritant                                                                                                  | Irritant                                                                                                                                                                       |
| Predicted Endpoint | Irritant                                                                                                                                          | Non-Irritant                                                                                              | Irritant                                                                                                                                                                       |
| Distance           | 0.844                                                                                                                                             | 0.871                                                                                                     | 0.884                                                                                                                                                                          |
| Reference          | 85JCAE "Prehled Prumyslove Toxikologie; Organické Latky," Marhold, J., Prague, Czechoslovakia, Avicenum, 1986 Volume(issue)/page/year: -,581,1986 | MVCRB3 MVC-Report. (Stockholm, Sweden) No.1-2, 1972-73. Discontinued. Volume(issue)/page/year: 2,193,1973 | AMIHBC AMA Archives of Industrial Hygiene and Occupational Medicine. (Chicago, IL) V.2-10, 1950-54. For publisher information, see AEHLAU. Volume(issue)/page/year: 5,311,1952 |

## Model Applicability

Unknown features are fingerprint features in the query molecule, but not found or appearing too infrequently in the training set.

1. All properties and OPS components are within expected ranges.

## Feature Contribution

### Top features for positive contribution

| Fingerprint | Bit/Smiles | Feature Structure | Score | Irritant in training set |
|-------------|------------|-------------------|-------|--------------------------|
|             |            |                   |       |                          |

|                                               |                   |                                                                                                                                         |              |                                 |
|-----------------------------------------------|-------------------|-----------------------------------------------------------------------------------------------------------------------------------------|--------------|---------------------------------|
| FCFP_12                                       | -124655670        | 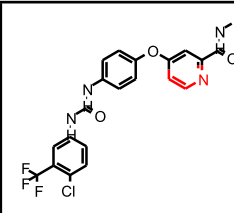<br>[*]:[cH]:[cH]:n:[*]                               | 0.0821       | 13 out of 13                    |
| FCFP_12                                       | -1539132615       | <br>[*]C(=[*])[c](-[cH]:[*]):n:[*]                   | 0.0795       | 9 out of 9                      |
| FCFP_12                                       | -1695756380       | <br>[*][c]1:[*]:[c]([*]):n:[cH]:[cH]:1               | 0.0772       | 7 out of 7                      |
| <b>Top Features for negative contribution</b> |                   |                                                                                                                                         |              |                                 |
| <b>Fingerprint</b>                            | <b>Bit/Smiles</b> | <b>Feature Structure</b>                                                                                                                | <b>Score</b> | <b>Irritant in training set</b> |
| FCFP_12                                       | -789307649        | <br>[*]O[c]1:[cH]:[cH]:[c](NC(=[*])[*]):[cH]:[cH]:1 | -1.54        | 0 out of 4                      |
| FCFP_12                                       | -1838187238       | <br>[*]C(=[*])N[c]1:[cH]:[cH]:[*]:[cH]:[cH]:1      | -0.692       | 5 out of 12                     |

|         |            |                                                                                                                                               |        |              |
|---------|------------|-----------------------------------------------------------------------------------------------------------------------------------------------|--------|--------------|
| FCFP_12 | 1294255210 | 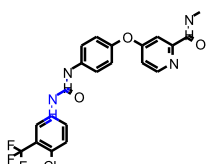<br><chem>[*]C(=[*])N(c(:[*])):</chem><br><chem>[*]</chem> | -0.486 | 12 out of 22 |
|---------|------------|-----------------------------------------------------------------------------------------------------------------------------------------------|--------|--------------|

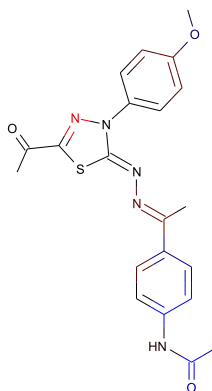

$C_{21}H_{21}N_5O_3S$

Molecular Weight: 423.48813

ALogP: 3.064

Rotatable Bonds: 6

Acceptors: 8

Donors: 1

### Model Prediction

Prediction: 25.2

Unit: mg/kg\_body\_weight/day

Mahalanobis Distance: 13.3

Mahalanobis Distance p-value: 2.2e-008

Mahalanobis Distance: The Mahalanobis distance (MD) is a generalization of the Euclidean distance that accounts for correlations among the X properties. It is calculated as the distance to the center of the training data. The larger the MD, the less trustworthy the prediction.

Mahalanobis Distance p-value: The p-value gives the fraction of training data with an MD greater than or equal to the one for the given sample, assuming normally distributed data. The smaller the p-value, the less trustworthy the predictor. For highly non-normal X properties (e.g., fingerprints), the MD p-value is wildly inaccurate.

### Structural Similar Compounds

| Name                        | 470     | [4-Chloro-6-(2,3-xylidino)-2-pyrimidinylthio]acetic acid s | Acifluorfen |
|-----------------------------|---------|------------------------------------------------------------|-------------|
| Structure                   |         |                                                            |             |
| Actual Endpoint (-log C)    | 4.62839 | 4.47685                                                    | 3.40908     |
| Predicted Endpoint (-log C) | 3.93264 | 3.8529                                                     | 3.10974     |
| Distance                    | 0.674   | 0.738                                                      | 0.744       |
| Reference                   | CPDB    | CPDB                                                       | CPDB        |

### Model Applicability

Unknown features are fingerprint features in the query molecule, but not found or appearing too infrequently in the training set.

1. All properties and OPS components are within expected ranges.
2. Unknown ECFP\_2 feature: 128986386: [\*]N=C(/C)\[c](:[\*]):[\*]
3. Unknown ECFP\_2 feature: 562081661: [\*]C(=NN=[\*])[\*]
4. Unknown ECFP\_2 feature: -819426257: [\*]C(=NN=[\*])[\*]
5. Unknown ECFP\_2 feature: 189949281: [\*]N=C\1/S[\*]=[\*]N1[\*]
6. Unknown ECFP\_2 feature: -934225701: [\*]C(=[\*])C1=N[\*][\*]S1
7. Unknown ECFP\_2 feature: -1110911409: [\*]=C1[\*][\*]=NN1[c](:[\*]):[\*]

### Feature Contribution

#### Top features for positive contribution

| Fingerprint | Bit/Smiles | Feature Structure | Score |
|-------------|------------|-------------------|-------|
|             |            |                   |       |

| ECFP_6                                 | 655739385   | 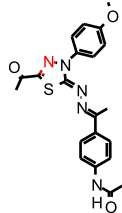<br>[*]N=[*]                           | 0.229  |
|----------------------------------------|-------------|---------------------------------------------------------------------------------------------------------------------------|--------|
| ECFP_6                                 | -175146122  | <br>[*]C(=[*])[c](:[cH]):-[*]:[cH]:[*] | 0.107  |
| ECFP_6                                 | -1087070950 | <br>[*]N=[*]                           | 0.104  |
| Top Features for negative contribution |             |                                                                                                                           |        |
| Fingerprint                            | Bit/Smiles  | Feature Structure                                                                                                         | Score  |
| ECFP_6                                 | 1996767644  | <br>[*][c](:[*]):[cH]:[cH]:[*]       | -0.251 |
| ECFP_6                                 | 642810091   | <br>[*][c](:[*]):[*]                 | -0.247 |

|        |            |                                                                                                                                                                                                                                                                                                                                                                                                                                   |        |
|--------|------------|-----------------------------------------------------------------------------------------------------------------------------------------------------------------------------------------------------------------------------------------------------------------------------------------------------------------------------------------------------------------------------------------------------------------------------------|--------|
| ECFP_6 | -182236392 | 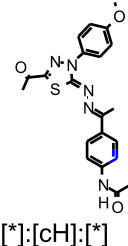 <p>The chemical structure shows a thiazole ring system. One nitrogen atom is substituted with a 4-methoxyphenyl group. The other nitrogen atom is substituted with a methyl group and a carbonyl group. The carbonyl group is further substituted with a 4-(dimethylamino)phenyl group. The structure is drawn in a vertical orientation.</p> | -0.232 |
|--------|------------|-----------------------------------------------------------------------------------------------------------------------------------------------------------------------------------------------------------------------------------------------------------------------------------------------------------------------------------------------------------------------------------------------------------------------------------|--------|

[\*]:[cH]:[\*]

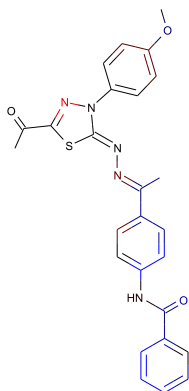

$C_{26}H_{23}N_5O_3S$

Molecular Weight: 485.55751

ALogP: 4.728

Rotatable Bonds: 7

Acceptors: 8

Donors: 1

## Model Prediction

Prediction: 19.1

Unit: mg/kg\_body\_weight/day

Mahalanobis Distance: 14.3

Mahalanobis Distance p-value: 5.86e-011

Mahalanobis Distance: The Mahalanobis distance (MD) is a generalization of the Euclidean distance that accounts for correlations among the X properties. It is calculated as the distance to the center of the training data. The larger the MD, the less trustworthy the prediction.

Mahalanobis Distance p-value: The p-value gives the fraction of training data with an MD greater than or equal to the one for the given sample, assuming normally distributed data. The smaller the p-value, the less trustworthy the prediction. For highly non-normal X properties (e.g., fingerprints), the MD p-value is wildly inaccurate.

## Structural Similar Compounds

| Name                        | 223     | 470     | Ochratoxin A |
|-----------------------------|---------|---------|--------------|
| Structure                   |         |         |              |
| Actual Endpoint (-log C)    | 5.08368 | 4.62839 | 4.79932      |
| Predicted Endpoint (-log C) | 5.08273 | 3.93264 | 3.6353       |
| Distance                    | 0.789   | 0.837   | 0.845        |
| Reference                   | CPDB    | CPDB    | CPDB         |

## Model Applicability

Unknown features are fingerprint features in the query molecule, but not found or appearing too infrequently in the training set.

1. All properties and OPS components are within expected ranges.
2. Unknown ECFP\_2 feature: 128986386: [\*]N=C(/C)\[c](:[\*]):[\*]
3. Unknown ECFP\_2 feature: 562081661: [\*]C(=NN=[\*])[\*]
4. Unknown ECFP\_2 feature: -819426257: [\*]C(=NN=[\*])[\*]
5. Unknown ECFP\_2 feature: 189949281: [\*]N=C\1/S[\*]=[\*]N1[\*]
6. Unknown ECFP\_2 feature: -934225701: [\*]C(=[\*])C1=N[\*][\*]S1
7. Unknown ECFP\_2 feature: -1110911409: [\*]=C1[\*][\*]=NN1[c](:[\*]):[\*]

## Feature Contribution

### Top features for positive contribution

| Fingerprint | Bit/Smiles | Feature Structure | Score |
|-------------|------------|-------------------|-------|
|             |            |                   |       |

|                                               |                   |                                                                                                                             |              |
|-----------------------------------------------|-------------------|-----------------------------------------------------------------------------------------------------------------------------|--------------|
| ECFP_6                                        | 655739385         | 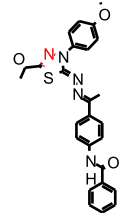<br>[*]N=[*]                             | 0.229        |
| ECFP_6                                        | -175146122        | <br>[*]C(=[*])[c](:[cH])[<br>*]:[cH]:[*] | 0.107        |
| ECFP_6                                        | -1087070950       | <br>[*]N=[*]                             | 0.104        |
| <b>Top Features for negative contribution</b> |                   |                                                                                                                             |              |
| <b>Fingerprint</b>                            | <b>Bit/Smiles</b> | <b>Feature Structure</b>                                                                                                    | <b>Score</b> |
| ECFP_6                                        | 1996767644        | <br>[*][c](:[*]):[cH]:[cH]<br>]:[*]    | -0.251       |
| ECFP_6                                        | 642810091         | <br>[*][c](:[*]):[*]                   | -0.247       |



|        |            |                                                                                                                                                                                                                                                                                                                                                                            |        |
|--------|------------|----------------------------------------------------------------------------------------------------------------------------------------------------------------------------------------------------------------------------------------------------------------------------------------------------------------------------------------------------------------------------|--------|
| ECFP_6 | -182236392 | 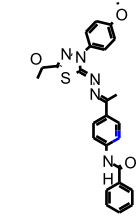 <p>The chemical structure shows a thiazole ring system. One nitrogen atom is bonded to a methyl group and a carbonyl group. The other nitrogen atom is bonded to a phenyl ring. The thiazole ring is connected to a benzene ring, which is further connected to a benzamide group.</p> | -0.232 |
|--------|------------|----------------------------------------------------------------------------------------------------------------------------------------------------------------------------------------------------------------------------------------------------------------------------------------------------------------------------------------------------------------------------|--------|

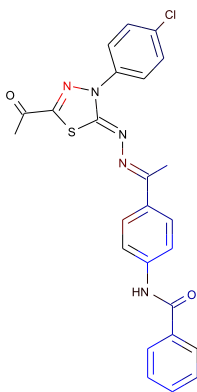

$C_{25}H_{20}ClN_5O_2S$

Molecular Weight: 489.97659

ALogP: 5.409

Rotatable Bonds: 6

Acceptors: 7

Donors: 1

### Model Prediction

Prediction: 10.1

Unit: mg/kg\_body\_weight/day

Mahalanobis Distance: 13.3

Mahalanobis Distance p-value: 1.67e-008

Mahalanobis Distance: The Mahalanobis distance (MD) is a generalization of the Euclidean distance that accounts for correlations among the X properties. It is calculated as the distance to the center of the training data. The larger the MD, the less trustworthy the prediction.

Mahalanobis Distance p-value: The p-value gives the fraction of training data with an MD greater than or equal to the one for the given sample, assuming normally distributed data. The smaller the p-value, the less trustworthy the prediction. For highly non-normal X properties (e.g., fingerprints), the MD p-value is wildly inaccurate.

### Structural Similar Compounds

| Name                        | 646      | Acifluorfen | [4-Chloro-6-(2,3-xylidino)-2-pyrimidinylthio]acetic acid s |
|-----------------------------|----------|-------------|------------------------------------------------------------|
| Structure                   |          |             |                                                            |
| Actual Endpoint (-log C)    | 0.937339 | 3.40908     | 4.47685                                                    |
| Predicted Endpoint (-log C) | 3.26294  | 3.10974     | 3.8529                                                     |
| Distance                    | 0.788    | 0.826       | 0.828                                                      |
| Reference                   | CPDB     | CPDB        | CPDB                                                       |

### Model Applicability

Unknown features are fingerprint features in the query molecule, but not found or appearing too infrequently in the training set.

1. All properties and OPS components are within expected ranges.
2. Unknown ECFP\_2 feature: 128986386: [\*]N=C(/C)[c](:[\*]):[\*]
3. Unknown ECFP\_2 feature: 562081661: [\*]C(=NN=[\*])[\*]
4. Unknown ECFP\_2 feature: -819426257: [\*]C(=NN=[\*])[\*]
5. Unknown ECFP\_2 feature: 189949281: [\*]N=C\1/S[\*]=[\*]N1[\*]
6. Unknown ECFP\_2 feature: -934225701: [\*]C(=[\*])C1=N[\*][\*]S1
7. Unknown ECFP\_2 feature: -1110911409: [\*]=C1[\*][\*]=NN1[c](:[\*]):[\*]

### Feature Contribution

#### Top features for positive contribution

| Fingerprint | Bit/Smiles | Feature Structure | Score |
|-------------|------------|-------------------|-------|
|             |            |                   |       |

|                                               |                   |                                                                                                                         |              |
|-----------------------------------------------|-------------------|-------------------------------------------------------------------------------------------------------------------------|--------------|
| ECFP_6                                        | 655739385         | 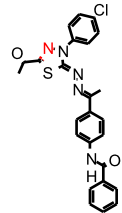<br>[*]N=[*]                         | 0.229        |
| ECFP_6                                        | -817402818        | <br>[*]Cl                            | 0.129        |
| ECFP_6                                        | -175146122        | <br>[*]C(=[*])[c](:[cH])[*]:[cH]:[*] | 0.107        |
| <b>Top Features for negative contribution</b> |                   |                                                                                                                         |              |
| <b>Fingerprint</b>                            | <b>Bit/Smiles</b> | <b>Feature Structure</b>                                                                                                | <b>Score</b> |
| ECFP_6                                        | 1996767644        | <br>[*][c](:[*]):[cH]:[cH]:[*]     | -0.251       |
| ECFP_6                                        | 642810091         | <br>[*][c](:[*]):[*]               | -0.247       |

|        |            |                                                                                                                                                                                                                                                                                                                                                                                                                                                                                                                                                                                                                              |        |
|--------|------------|------------------------------------------------------------------------------------------------------------------------------------------------------------------------------------------------------------------------------------------------------------------------------------------------------------------------------------------------------------------------------------------------------------------------------------------------------------------------------------------------------------------------------------------------------------------------------------------------------------------------------|--------|
| ECFP_6 | -182236392 | 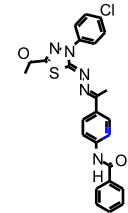 <p>The chemical structure shows a thioamide group (-NH-C(=S)-) attached to a benzene ring. This benzene ring is further substituted with a chlorine atom (Cl) and a nitrogen-containing chain. The nitrogen-containing chain consists of a nitrogen atom bonded to a sulfur atom, which is in turn bonded to another nitrogen atom. This second nitrogen atom is bonded to a benzene ring with a chlorine atom at the para position. The thioamide group is also bonded to a benzene ring with a chlorine atom at the para position.</p> | -0.232 |
|--------|------------|------------------------------------------------------------------------------------------------------------------------------------------------------------------------------------------------------------------------------------------------------------------------------------------------------------------------------------------------------------------------------------------------------------------------------------------------------------------------------------------------------------------------------------------------------------------------------------------------------------------------------|--------|

[\*]:[cH]:[\*]

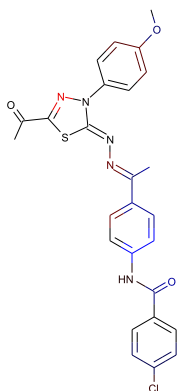

$C_{26}H_{22}ClN_5O_3S$

Molecular Weight: 520.00258

ALogP: 5.392

Rotatable Bonds: 7

Acceptors: 8

Donors: 1

### Model Prediction

Prediction: 5.86

Unit: mg/kg\_body\_weight/day

Mahalanobis Distance: 14.7

Mahalanobis Distance p-value: 2.56e-012

Mahalanobis Distance: The Mahalanobis distance (MD) is a generalization of the Euclidean distance that accounts for correlations among the X properties. It is calculated as the distance to the center of the training data. The larger the MD, the less trustworthy the prediction.

Mahalanobis Distance p-value: The p-value gives the fraction of training data with an MD greater than or equal to the one for the given sample, assuming normally distributed data. The smaller the p-value, the less trustworthy the prediction. For highly non-normal X properties (e.g., fingerprints), the MD p-value is wildly inaccurate.

### Structural Similar Compounds

| Name                        | 223     | Acifluorfen | Ochratoxin A |
|-----------------------------|---------|-------------|--------------|
| Structure                   |         |             |              |
| Actual Endpoint (-log C)    | 5.08368 | 3.40908     | 4.79932      |
| Predicted Endpoint (-log C) | 5.08273 | 3.10974     | 3.6353       |
| Distance                    | 0.781   | 0.871       | 0.878        |
| Reference                   | CPDB    | CPDB        | CPDB         |

### Model Applicability

Unknown features are fingerprint features in the query molecule, but not found or appearing too infrequently in the training set.

1. OPS PC24 out of range. Value: -4.6195. Training min, max, SD, explained variance: -4.4826, 3.8729, 1.034, 0.0133.
2. Unknown ECFP\_2 feature: 128986386: [\*]N=C(/C)\[c](:[\*]):[\*]
3. Unknown ECFP\_2 feature: 562081661: [\*]C(=NN=[\*])[\*]
4. Unknown ECFP\_2 feature: -819426257: [\*]C(=NN=[\*])[\*]
5. Unknown ECFP\_2 feature: 189949281: [\*]N=C\1/S[\*]=[\*]N1[\*]
6. Unknown ECFP\_2 feature: -934225701: [\*]C(=[\*])C1=N[\*][\*]S1
7. Unknown ECFP\_2 feature: -1110911409: [\*]=C1[\*][\*]=NN1[c](:[\*]):[\*]

### Feature Contribution

#### Top features for positive contribution

| Fingerprint | Bit/Smiles | Feature Structure | Score |
|-------------|------------|-------------------|-------|
|             |            |                   |       |

|                                               |                   |                                                                                                                         |              |
|-----------------------------------------------|-------------------|-------------------------------------------------------------------------------------------------------------------------|--------------|
| ECFP_6                                        | 655739385         | 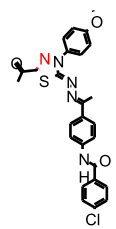<br>[*]N=[*]                          | 0.229        |
| ECFP_6                                        | -817402818        | <br>[*]Cl                            | 0.129        |
| ECFP_6                                        | -175146122        | <br>[*]C(=[*])[c](:[cH])[*]:[cH]:[*] | 0.107        |
| <b>Top Features for negative contribution</b> |                   |                                                                                                                         |              |
| <b>Fingerprint</b>                            | <b>Bit/Smiles</b> | <b>Feature Structure</b>                                                                                                | <b>Score</b> |
| ECFP_6                                        | 1996767644        | <br>[*][c](:[*]):[cH]:[cH]:[*]     | -0.251       |
| ECFP_6                                        | 642810091         | <br>[*][c](:[*]):[*]               | -0.247       |

|        |            |                                                                                                     |        |
|--------|------------|-----------------------------------------------------------------------------------------------------|--------|
| ECFP_6 | -182236392 | 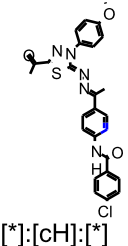<br>[*]:[cH]:[*] | -0.232 |
|--------|------------|-----------------------------------------------------------------------------------------------------|--------|

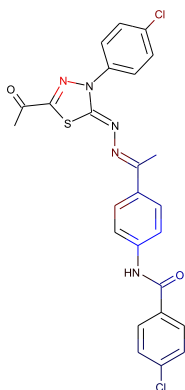

$C_{25}H_{19}Cl_2N_5O_2S$

Molecular Weight: 524.42166

ALogP: 6.073

Rotatable Bonds: 6

Acceptors: 7

Donors: 1

### Model Prediction

Prediction: 3.51

Unit: mg/kg\_body\_weight/day

Mahalanobis Distance: 12.6

Mahalanobis Distance p-value: 1.36e-006

Mahalanobis Distance: The Mahalanobis distance (MD) is a generalization of the Euclidean distance that accounts for correlations among the X properties. It is calculated as the distance to the center of the training data. The larger the MD, the less trustworthy the prediction.

Mahalanobis Distance p-value: The p-value gives the fraction of training data with an MD greater than or equal to the one for the given sample, assuming normally distributed data. The smaller the p-value, the less trustworthy the prediction. For highly non-normal X properties (e.g., fingerprints), the MD p-value is wildly inaccurate.

### Structural Similar Compounds

| Name                        | 646      | Acifluorfen | [4-Chloro-6-(2,3-xylidino)-2-pyrimidinylthio]acetic acid s |
|-----------------------------|----------|-------------|------------------------------------------------------------|
| Structure                   |          |             |                                                            |
| Actual Endpoint (-log C)    | 0.937339 | 3.40908     | 4.47685                                                    |
| Predicted Endpoint (-log C) | 3.26294  | 3.10974     | 3.8529                                                     |
| Distance                    | 0.829    | 0.854       | 0.863                                                      |
| Reference                   | CPDB     | CPDB        | CPDB                                                       |

### Model Applicability

Unknown features are fingerprint features in the query molecule, but not found or appearing too infrequently in the training set.

- OPS PC20 out of range. Value: 3.7769. Training min, max, SD, explained variance: -4.3384, 3.4394, 1.14, 0.0162.
- Unknown ECFP\_2 feature: 128986386: [\*]\N=C(/C)\[c](:[\*]):[\*]
- Unknown ECFP\_2 feature: 562081661: [\*]C(=NN=[\*])[\*]
- Unknown ECFP\_2 feature: -819426257: [\*]C(=NN=[\*])[\*]
- Unknown ECFP\_2 feature: 189949281: [\*]\N=C\1/S[\*]=[\*]N1[\*]
- Unknown ECFP\_2 feature: -934225701: [\*]C(=[\*])C1=N[\*][\*]S1
- Unknown ECFP\_2 feature: -1110911409: [\*]=C1[\*][\*]=NN1[c](:[\*]):[\*]

### Feature Contribution

#### Top features for positive contribution

| Fingerprint | Bit/Smiles | Feature Structure | Score |
|-------------|------------|-------------------|-------|
|             |            |                   |       |



|                                               |                   |                                                                                                                         |              |
|-----------------------------------------------|-------------------|-------------------------------------------------------------------------------------------------------------------------|--------------|
| ECFP_6                                        | 655739385         | 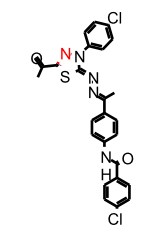<br>[*]N=[*]                          | 0.229        |
| ECFP_6                                        | -817402818        | <br>[*]Cl                            | 0.129        |
| ECFP_6                                        | -175146122        | <br>[*]C(=[*])[c](:[cH])[*]:[cH]:[*] | 0.107        |
| <b>Top Features for negative contribution</b> |                   |                                                                                                                         |              |
| <b>Fingerprint</b>                            | <b>Bit/Smiles</b> | <b>Feature Structure</b>                                                                                                | <b>Score</b> |
| ECFP_6                                        | 1996767644        | <br>[*][c](:[*]):[cH]:[cH]:[*]     | -0.251       |
| ECFP_6                                        | 642810091         | <br>[*][c](:[*]):[*]               | -0.247       |

|        |            |                                                                                                    |        |
|--------|------------|----------------------------------------------------------------------------------------------------|--------|
| ECFP_6 | -182236392 | 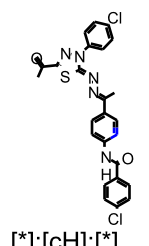<br>[*]:[cH]:[*] | -0.232 |
|--------|------------|----------------------------------------------------------------------------------------------------|--------|

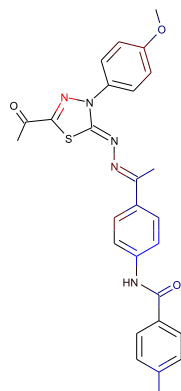

$C_{27}H_{25}N_5O_3S$

Molecular Weight: 499.58409

ALogP: 5.214

Rotatable Bonds: 7

Acceptors: 8

Donors: 1

### Model Prediction

Prediction: 11

Unit: mg/kg\_body\_weight/day

Mahalanobis Distance: 14.7

Mahalanobis Distance p-value: 4.27e-012

Mahalanobis Distance: The Mahalanobis distance (MD) is a generalization of the Euclidean distance that accounts for correlations among the X properties. It is calculated as the distance to the center of the training data. The larger the MD, the less trustworthy the prediction.

Mahalanobis Distance p-value: The p-value gives the fraction of training data with an MD greater than or equal to the one for the given sample, assuming normally distributed data. The smaller the p-value, the less trustworthy the prediction. For highly non-normal X properties (e.g., fingerprints), the MD p-value is wildly inaccurate.

### Structural Similar Compounds

| Name                        | 223     | 646      | 470     |
|-----------------------------|---------|----------|---------|
| Structure                   |         |          |         |
| Actual Endpoint (-log C)    | 5.08368 | 0.937339 | 4.62839 |
| Predicted Endpoint (-log C) | 5.08273 | 3.26294  | 3.93264 |
| Distance                    | 0.787   | 0.852    | 0.861   |
| Reference                   | CPDB    | CPDB     | CPDB    |

### Model Applicability

Unknown features are fingerprint features in the query molecule, but not found or appearing too infrequently in the training set.

1. All properties and OPS components are within expected ranges.
2. Unknown ECFP\_2 feature: 128986386: [\*]N=C(/C)\[c](:[\*]):[\*]
3. Unknown ECFP\_2 feature: 562081661: [\*]C(=NN=[\*])[\*]
4. Unknown ECFP\_2 feature: -819426257: [\*]C(=NN=[\*])[\*]
5. Unknown ECFP\_2 feature: 189949281: [\*]N=C\1/S[\*]=[\*]N1[\*]
6. Unknown ECFP\_2 feature: -934225701: [\*]C(=[\*])C1=N[\*][\*]S1
7. Unknown ECFP\_2 feature: -1110911409: [\*]=C1[\*][\*]=NN1[c](:[\*]):[\*]

### Feature Contribution

#### Top features for positive contribution

| Fingerprint | Bit/Smiles | Feature Structure | Score |
|-------------|------------|-------------------|-------|
|             |            |                   |       |

|                                               |                   |                                                                                                                             |              |
|-----------------------------------------------|-------------------|-----------------------------------------------------------------------------------------------------------------------------|--------------|
| ECFP_6                                        | 655739385         | 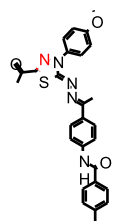<br>[*]N=[*]                              | 0.229        |
| ECFP_6                                        | -175146122        | <br>[*]C(=[*])[c](:[cH])[<br>*]:[cH]:[*] | 0.107        |
| ECFP_6                                        | -1087070950       | <br>[*]N=[*]                             | 0.104        |
| <b>Top Features for negative contribution</b> |                   |                                                                                                                             |              |
| <b>Fingerprint</b>                            | <b>Bit/Smiles</b> | <b>Feature Structure</b>                                                                                                    | <b>Score</b> |
| ECFP_6                                        | 1996767644        | <br>[*][c](:[*]):[cH]:[cH]<br>]:[*]    | -0.251       |
| ECFP_6                                        | 642810091         | <br>[*][c](:[*]):[*]                   | -0.247       |

|        |           |                                                                                                     |       |
|--------|-----------|-----------------------------------------------------------------------------------------------------|-------|
| ECFP_6 | 182236392 | 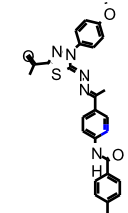<br>[*]:[cH]:[*] | 0.232 |
|--------|-----------|-----------------------------------------------------------------------------------------------------|-------|

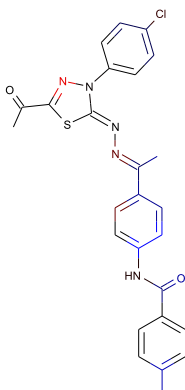

$C_{26}H_{22}ClN_5O_2S$

Molecular Weight: 504.00318

ALogP: 5.895

Rotatable Bonds: 6

Acceptors: 7

Donors: 1

### Model Prediction

Prediction: 5.83

Unit: mg/kg\_body\_weight/day

Mahalanobis Distance: 13.1

Mahalanobis Distance p-value: 8.89e-008

Mahalanobis Distance: The Mahalanobis distance (MD) is a generalization of the Euclidean distance that accounts for correlations among the X properties. It is calculated as the distance to the center of the training data. The larger the MD, the less trustworthy the prediction.

Mahalanobis Distance p-value: The p-value gives the fraction of training data with an MD greater than or equal to the one for the given sample, assuming normally distributed data. The smaller the p-value, the less trustworthy the prediction. For highly non-normal X properties (e.g., fingerprints), the MD p-value is wildly inaccurate.

### Structural Similar Compounds

| Name                        | 646      | Acifluorfen | [4-Chloro-6-(2,3-xylidino)-2-pyrimidinylthio]acetic acid s |
|-----------------------------|----------|-------------|------------------------------------------------------------|
| Structure                   |          |             |                                                            |
| Actual Endpoint (-log C)    | 0.937339 | 3.40908     | 4.47685                                                    |
| Predicted Endpoint (-log C) | 3.26294  | 3.10974     | 3.8529                                                     |
| Distance                    | 0.798    | 0.841       | 0.843                                                      |
| Reference                   | CPDB     | CPDB        | CPDB                                                       |

### Model Applicability

Unknown features are fingerprint features in the query molecule, but not found or appearing too infrequently in the training set.

- OPS PC20 out of range. Value: 3.6466. Training min, max, SD, explained variance: -4.3384, 3.4394, 1.14, 0.0162.
- Unknown ECFP\_2 feature: 128986386: [\*]\N=C(/C)\[c](:[\*]):[\*]
- Unknown ECFP\_2 feature: 562081661: [\*]C(=NN=[\*])[\*]
- Unknown ECFP\_2 feature: -819426257: [\*]C(=NN=[\*])[\*]
- Unknown ECFP\_2 feature: 189949281: [\*]\N=C\1/S[\*]=[\*]N1[\*]
- Unknown ECFP\_2 feature: -934225701: [\*]C(=[\*])C1=N[\*][\*]S1
- Unknown ECFP\_2 feature: -1110911409: [\*]=C1[\*][\*]=NN1[c](:[\*]):[\*]

### Feature Contribution

#### Top features for positive contribution

| Fingerprint | Bit/Smiles | Feature Structure | Score |
|-------------|------------|-------------------|-------|
|             |            |                   |       |

|                                               |                   |                                                                                                                           |              |
|-----------------------------------------------|-------------------|---------------------------------------------------------------------------------------------------------------------------|--------------|
| ECFP_6                                        | 655739385         | 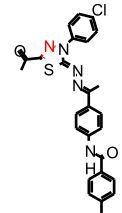<br>[*]N=[*]                           | 0.229        |
| ECFP_6                                        | -817402818        | <br>[*]Cl                              | 0.129        |
| ECFP_6                                        | -175146122        | <br>[*]C(=[*])[c](:[cH]):-[*])[cH]:[*] | 0.107        |
| <b>Top Features for negative contribution</b> |                   |                                                                                                                           |              |
| <b>Fingerprint</b>                            | <b>Bit/Smiles</b> | <b>Feature Structure</b>                                                                                                  | <b>Score</b> |
| ECFP_6                                        | 1996767644        | <br>[*][c](:[*]):[cH]:[cH]):-[*]     | -0.251       |
| ECFP_6                                        | 642810091         | <br>[*][c](:[*]):[*]                 | -0.247       |

|        |            |                                                                                                     |        |
|--------|------------|-----------------------------------------------------------------------------------------------------|--------|
| ECFP_6 | -182236392 | 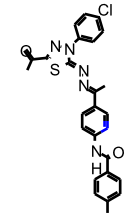<br>[*]:[cH]:[*] | -0.232 |
|--------|------------|-----------------------------------------------------------------------------------------------------|--------|



# Sorafenib

# TOPKAT\_Carcinogenic\_Potency\_TD50\_Mouse

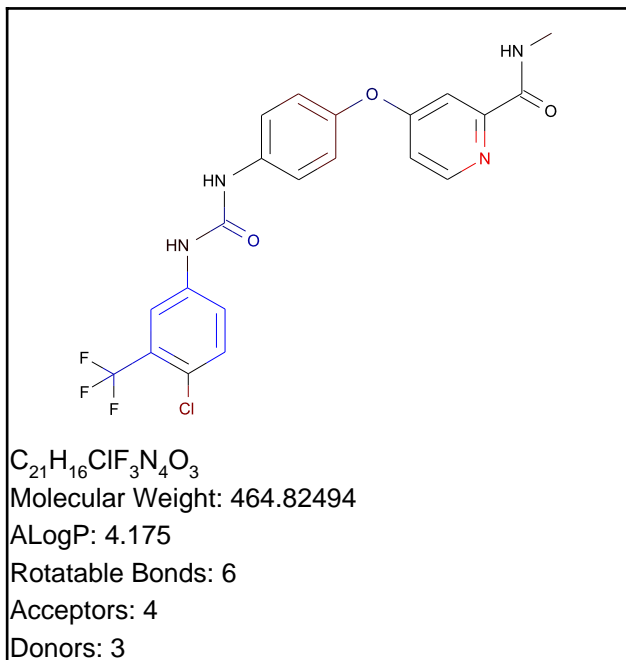

## Model Prediction

Prediction: 19.2

Unit: mg/kg\_body\_weight/day

Mahalanobis Distance: 12.4

Mahalanobis Distance p-value: 2.94e-006

Mahalanobis Distance: The Mahalanobis distance (MD) is a generalization of the Euclidean distance that accounts for correlations among the X properties. It is calculated as the distance to the center of the training data. The larger the MD, the less trustworthy the prediction.

Mahalanobis Distance p-value: The p-value gives the fraction of training data with an MD greater than or equal to the one for the given sample, assuming normally distributed data. The smaller the p-value, the less trustworthy the prediction. For highly non-normal X properties (e.g., fingerprints), the MD p-value is wildly inaccurate.

## Structural Similar Compounds

| Name                        | Ochratoxin A                                                                        | 542                                                                                 | 4-Chloro-6-(2,3-xylylidino)-2-pyridinylthio(N-b-hydroxy-ethyl) acetamide            |
|-----------------------------|-------------------------------------------------------------------------------------|-------------------------------------------------------------------------------------|-------------------------------------------------------------------------------------|
| Structure                   | 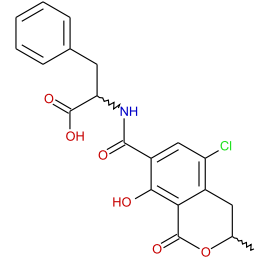 |  |  |
| Actual Endpoint (-log C)    | 4.79932                                                                             | 4.79932                                                                             | 3.91517                                                                             |
| Predicted Endpoint (-log C) | 3.6353                                                                              | 3.6353                                                                              | 3.92186                                                                             |
| Distance                    | 0.718                                                                               | 0.718                                                                               | 0.738                                                                               |
| Reference                   | CPDB                                                                                | CPDB                                                                                | CPDB                                                                                |

## Model Applicability

Unknown features are fingerprint features in the query molecule, but not found or appearing too infrequently in the training set.

- All properties and OPS components are within expected ranges.
- Unknown ECFP\_2 feature: 1338334141: [\*]C(=[\*])NC
- Unknown ECFP\_2 feature: 1413420509: [\*]C(=[\*])[c](:n:[\*]):c:[\*]

## Feature Contribution

### Top features for positive contribution

| Fingerprint | Bit/Smiles | Feature Structure                                                                                 | Score |
|-------------|------------|---------------------------------------------------------------------------------------------------|-------|
| ECFP_6      | 655739385  | 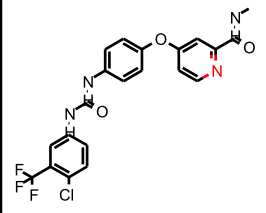<br>[*]N=[*] | 0.229 |

|                                               |                   |                                                                                                                    |              |
|-----------------------------------------------|-------------------|--------------------------------------------------------------------------------------------------------------------|--------------|
| ECFP_6                                        | -817402818        | 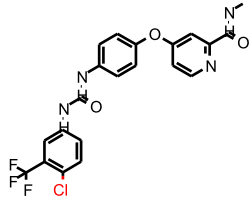<br>[*]Cl                       | 0.129        |
| ECFP_6                                        | -176455838        | <br>[*]O[c](:[cH]:[*]):[cH]:[*] | 0.0818       |
| <b>Top Features for negative contribution</b> |                   |                                                                                                                    |              |
| <b>Fingerprint</b>                            | <b>Bit/Smiles</b> | <b>Feature Structure</b>                                                                                           | <b>Score</b> |
| ECFP_6                                        | 1996767644        | <br>[*][c](:[*]):[cH]:[cH]:[*]  | -0.251       |
| ECFP_6                                        | 642810091         | <br>[*][c](:[*]):[*]          | -0.247       |
| ECFP_6                                        | -182236392        | <br>[*]:[cH]:[*]              | -0.232       |



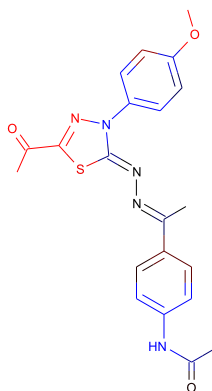

$C_{21}H_{21}N_5O_3S$

Molecular Weight: 423.48813

ALogP: 3.064

Rotatable Bonds: 6

Acceptors: 8

Donors: 1

### Model Prediction

Prediction: 2.46

Unit: mg/kg\_body\_weight/day

Mahalanobis Distance: 14.1

Mahalanobis Distance p-value: 1.52e-008

Mahalanobis Distance: The Mahalanobis distance (MD) is a generalization of the Euclidean distance that accounts for correlations among the X properties. It is calculated as the distance to the center of the training data. The larger the MD, the less trustworthy the prediction.

Mahalanobis Distance p-value: The p-value gives the fraction of training data with an MD greater than or equal to the one for the given sample, assuming normally distributed data. The smaller the p-value, the less trustworthy the prediction. For highly non-normal X properties (e.g., fingerprints), the MD p-value is wildly inaccurate.

### Structural Similar Compounds

| Name                        | C.I. direct brown 95 | 4,4'-Sulfonylbisacetanilide | Omeprazole |
|-----------------------------|----------------------|-----------------------------|------------|
| Structure                   |                      |                             |            |
| Actual Endpoint (-log C)    | 5.31387              | 3.77655                     | 3.4628     |
| Predicted Endpoint (-log C) | 4.30266              | 3.55337                     | 4.7324     |
| Distance                    | 0.616                | 0.697                       | 0.697      |
| Reference                   | CPDB                 | CPDB                        | CPDB       |

### Model Applicability

Unknown features are fingerprint features in the query molecule, but not found or appearing too infrequently in the training set.

1. OPS PC7 out of range. Value: -5.4904. Training min, max, SD, explained variance: -5.0422, 6.1749, 1.868, 0.0335.

### Feature Contribution

| Top features for positive contribution |            |                   |       |
|----------------------------------------|------------|-------------------|-------|
| Fingerprint                            | Bit/Smiles | Feature Structure | Score |
| FCFP_6                                 | 136627117  | <br>[*]OC         | 0.69  |

|                                               |                   |                                                                                                                                                   |              |
|-----------------------------------------------|-------------------|---------------------------------------------------------------------------------------------------------------------------------------------------|--------------|
| FCFP_6                                        | 565998553         | 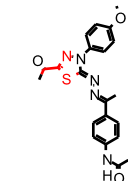<br><chem>[*]C(=[*])C1=N[*]I[*]S1</chem>                       | 0.357        |
| FCFP_6                                        | 565968762         | <br><chem>[*]C(=[*])C(=O)C</chem>                              | 0.266        |
| <b>Top Features for negative contribution</b> |                   |                                                                                                                                                   |              |
| <b>Fingerprint</b>                            | <b>Bit/Smiles</b> | <b>Feature Structure</b>                                                                                                                          | <b>Score</b> |
| FCFP_6                                        | 16                | <br><chem>[*]:[cH]:[*]</chem>                                  | -0.354       |
| FCFP_6                                        | 590925877         | <br><chem>[*]N(c(:[cH]:[*])):[cH]:[*]</chem>                  | -0.323       |
| FCFP_6                                        | 1674451008        | <br><chem>[*]N([*])[c]1:[cH]:[*]:[c]([*]):[cH]:[cH]:1</chem> | -0.233       |



18a

TOPKAT\_Carcinogenic\_Potency\_TD50\_Rat

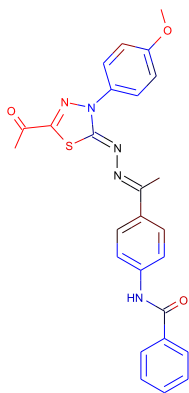C<sub>26</sub>H<sub>23</sub>N<sub>5</sub>O<sub>3</sub>S

Molecular Weight: 485.55751

ALogP: 4.728

Rotatable Bonds: 7

Acceptors: 8

Donors: 1

### Model Prediction

Prediction: 3.63

Unit: mg/kg\_body\_weight/day

Mahalanobis Distance: 14.4

Mahalanobis Distance p-value: 1.69e-009

Mahalanobis Distance: The Mahalanobis distance (MD) is a generalization of the Euclidean distance that accounts for correlations among the X properties. It is calculated as the distance to the center of the training data. The larger the MD, the less trustworthy the prediction.

Mahalanobis Distance p-value: The p-value gives the fraction of training data with an MD greater than or equal to the one for the given sample, assuming normally distributed data. The smaller the p-value, the less trustworthy the prediction. For highly non-normal X properties (e.g., fingerprints), the MD p-value is wildly inaccurate.

### Structural Similar Compounds

| Name                        | C.I. direct brown 95 | FD & C violet no. 1 | 5,6-Dimethoxysterigmatocystin |
|-----------------------------|----------------------|---------------------|-------------------------------|
| Structure                   |                      |                     |                               |
| Actual Endpoint (-log C)    | 5.31387              | 2.8543              | 6.02361                       |
| Predicted Endpoint (-log C) | 4.30266              | 3.40838             | 4.98771                       |
| Distance                    | 0.606                | 0.779               | 0.780                         |
| Reference                   | CPDB                 | CPDB                | CPDB                          |

### Model Applicability

Unknown features are fingerprint features in the query molecule, but not found or appearing too infrequently in the training set.

- OPS PC7 out of range. Value: -5.7577. Training min, max, SD, explained variance: -5.0422, 6.1749, 1.868, 0.0335.

### Feature Contribution

#### Top features for positive contribution

| Fingerprint | Bit/Smiles | Feature Structure | Score |
|-------------|------------|-------------------|-------|
| FCFP_6      | 136627117  | <br>[*]OC         | 0.69  |

|                                               |                   |                                                                                                                                               |              |
|-----------------------------------------------|-------------------|-----------------------------------------------------------------------------------------------------------------------------------------------|--------------|
| FCFP_6                                        | 565998553         | 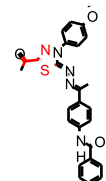<br><chem>[*]C(=*)C1=N[*]I[*]S</chem>                      | 0.357        |
| FCFP_6                                        | 565968762         | <br><chem>[*]C(=[*])C(=O)C</chem>                          | 0.266        |
| <b>Top Features for negative contribution</b> |                   |                                                                                                                                               |              |
| <b>Fingerprint</b>                            | <b>Bit/Smiles</b> | <b>Feature Structure</b>                                                                                                                      | <b>Score</b> |
| FCFP_6                                        | 991735244         | <br><chem>[*][c]1:[*]:[cH]:[cH]:[cH]:[cH]:1</chem>         | -0.422       |
| FCFP_6                                        | -2093839777       | <br><chem>[*][c]1:[cH]:[cH]:[cH]:[cH]:[cH]:[cH]:1</chem> | -0.378       |
| FCFP_6                                        | 16                | <br><chem>[*]:[cH]:[*]</chem>                            | -0.354       |





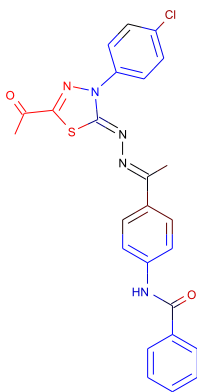

$C_{25}H_{20}ClN_5O_2S$

Molecular Weight: 489.97659

ALogP: 5.409

Rotatable Bonds: 6

Acceptors: 7

Donors: 1

### Model Prediction

Prediction: 12

Unit: mg/kg\_body\_weight/day

Mahalanobis Distance: 14.2

Mahalanobis Distance p-value: 7.46e-009

Mahalanobis Distance: The Mahalanobis distance (MD) is a generalization of the Euclidean distance that accounts for correlations among the X properties. It is calculated as the distance to the center of the training data. The larger the MD, the less trustworthy the prediction.

Mahalanobis Distance p-value: The p-value gives the fraction of training data with an MD greater than or equal to the one for the given sample, assuming normally distributed data. The smaller the p-value, the less trustworthy the prediction. For highly non-normal X properties (e.g., fingerprints), the MD p-value is wildly inaccurate.

### Structural Similar Compounds

| Name                        | C.I. direct brown 95 | FD & C violet no. 1 | 3-(Cyclopentyloxy)-N-(3,5-dichloro-4-pyridyl)-4-methoxybenzamide |
|-----------------------------|----------------------|---------------------|------------------------------------------------------------------|
| Structure                   |                      |                     |                                                                  |
| Actual Endpoint (-log C)    | 5.31387              | 2.8543              | 5.39369                                                          |
| Predicted Endpoint (-log C) | 4.30266              | 3.40838             | 4.27874                                                          |
| Distance                    | 0.659                | 0.719               | 0.748                                                            |
| Reference                   | CPDB                 | CPDB                | CPDB                                                             |

### Model Applicability

Unknown features are fingerprint features in the query molecule, but not found or appearing too infrequently in the training set.

- All properties and OPS components are within expected ranges.

### Feature Contribution

#### Top features for positive contribution

| Fingerprint | Bit/Smiles | Feature Structure                    | Score |
|-------------|------------|--------------------------------------|-------|
| FCFP_6      | 565998553  | <br><chem>[*]C(=*)C1=N[*][*]S</chem> | 0.357 |

|                                               |                   |                                                                                                                                                 |              |
|-----------------------------------------------|-------------------|-------------------------------------------------------------------------------------------------------------------------------------------------|--------------|
| FCFP_6                                        | 565968762         | 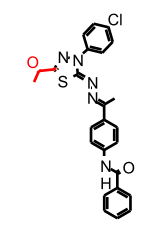<br><chem>[*]C(=[*])C(=O)C</chem>                             | 0.266        |
| FCFP_6                                        | 1                 | <br><chem>[*]=O</chem>                                       | 0.234        |
| <b>Top Features for negative contribution</b> |                   |                                                                                                                                                 |              |
| <b>Fingerprint</b>                            | <b>Bit/Smiles</b> | <b>Feature Structure</b>                                                                                                                        | <b>Score</b> |
| FCFP_6                                        | 991735244         | <br><chem>[*][c]1:[*]:[cH]:[cH]:[cH]:[cH]:[cH]:[cH]:1</chem> | -0.422       |
| FCFP_6                                        | -2093839777       | <br><chem>[*][c]1:[cH]:[cH]:[cH]:[cH]:[cH]:[cH]:1</chem>   | -0.378       |
| FCFP_6                                        | 16                | <br><chem>[*]:[cH]:[*]</chem>                              | -0.354       |



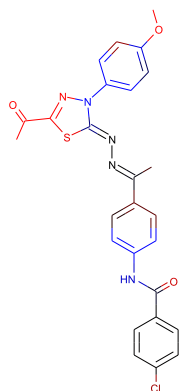

$C_{26}H_{22}ClN_5O_3S$

Molecular Weight: 520.00258

ALogP: 5.392

Rotatable Bonds: 7

Acceptors: 8

Donors: 1

### Model Prediction

Prediction: 0.349

Unit: mg/kg\_body\_weight/day

Mahalanobis Distance: 14.7

Mahalanobis Distance p-value: 2.92e-010

Mahalanobis Distance: The Mahalanobis distance (MD) is a generalization of the Euclidean distance that accounts for correlations among the X properties. It is calculated as the distance to the center of the training data. The larger the MD, the less trustworthy the prediction.

Mahalanobis Distance p-value: The p-value gives the fraction of training data with an MD greater than or equal to the one for the given sample, assuming normally distributed data. The smaller the p-value, the less trustworthy the prediction. For highly non-normal X properties (e.g., fingerprints), the MD p-value is wildly inaccurate.

### Structural Similar Compounds

| Name                        | C.I. direct brown 95 | 223     | FD & C violet no. 1 |
|-----------------------------|----------------------|---------|---------------------|
| Structure                   |                      |         |                     |
| Actual Endpoint (-log C)    | 5.31387              | 6.29867 | 2.8543              |
| Predicted Endpoint (-log C) | 4.30266              | 7.5657  | 3.40838             |
| Distance                    | 0.647                | 0.787   | 0.796               |
| Reference                   | CPDB                 | CPDB    | CPDB                |

### Model Applicability

Unknown features are fingerprint features in the query molecule, but not found or appearing too infrequently in the training set.

- OPS PC7 out of range. Value: -5.3084. Training min, max, SD, explained variance: -5.0422, 6.1749, 1.868, 0.0335.

### Feature Contribution

#### Top features for positive contribution

| Fingerprint | Bit/Smiles | Feature Structure | Score |
|-------------|------------|-------------------|-------|
| FCFP_6      | 136627117  |                   | 0.69  |

|                                               |                   |                                                                                                                                                       |              |
|-----------------------------------------------|-------------------|-------------------------------------------------------------------------------------------------------------------------------------------------------|--------------|
| FCFP_6                                        | 565998553         | 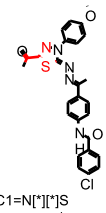<br><chem>[*]C(=O)C1=N[*]I[*]S1</chem>                             | 0.357        |
| FCFP_6                                        | 565968762         | <br><chem>[*]C(=O)C(=O)C</chem>                                    | 0.266        |
| <b>Top Features for negative contribution</b> |                   |                                                                                                                                                       |              |
| <b>Fingerprint</b>                            | <b>Bit/Smiles</b> | <b>Feature Structure</b>                                                                                                                              | <b>Score</b> |
| FCFP_6                                        | 16                | <br><chem>[*]:[cH]:[*]</chem>                                      | -0.354       |
| FCFP_6                                        | 590925877         | <br><chem>[*]N[c](:[cH]:[*]D):[cH]:[*]</chem>                    | -0.323       |
| FCFP_6                                        | 1674451008        | <br><chem>[*]N([*])[c]1:[c]([*]):[*]:[c]([*]):[cH]:[cH]:1</chem> | -0.233       |



18d

TOPKAT\_Carcinogenic\_Potency\_TD50\_Rat

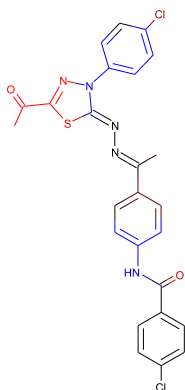C<sub>25</sub>H<sub>19</sub>Cl<sub>2</sub>N<sub>5</sub>O<sub>2</sub>S

Molecular Weight: 524.42166

ALogP: 6.073

Rotatable Bonds: 6

Acceptors: 7

Donors: 1

### Model Prediction

Prediction: 1.66

Unit: mg/kg\_body\_weight/day

Mahalanobis Distance: 13.5

Mahalanobis Distance p-value: 3.62e-007

Mahalanobis Distance: The Mahalanobis distance (MD) is a generalization of the Euclidean distance that accounts for correlations among the X properties. It is calculated as the distance to the center of the training data. The larger the MD, the less trustworthy the prediction.

Mahalanobis Distance p-value: The p-value gives the fraction of training data with an MD greater than or equal to the one for the given sample, assuming normally distributed data. The smaller the p-value, the less trustworthy the prediction. For highly non-normal X properties (e.g., fingerprints), the MD p-value is wildly inaccurate.

### Structural Similar Compounds

| Name                        | C.I. direct brown 95 | FD & C violet no. 1 | 3-(Cyclopentyloxy)-N-(3,5-di-chloro-4-pyridyl)-4-methoxy-benzamide |
|-----------------------------|----------------------|---------------------|--------------------------------------------------------------------|
| Structure                   |                      |                     |                                                                    |
| Actual Endpoint (-log C)    | 5.31387              | 2.8543              | 5.39369                                                            |
| Predicted Endpoint (-log C) | 4.30266              | 3.40838             | 4.27874                                                            |
| Distance                    | 0.696                | 0.742               | 0.776                                                              |
| Reference                   | CPDB                 | CPDB                | CPDB                                                               |

### Model Applicability

Unknown features are fingerprint features in the query molecule, but not found or appearing too infrequently in the training set.

- All properties and OPS components are within expected ranges.

### Feature Contribution

#### Top features for positive contribution

| Fingerprint | Bit/Smiles | Feature Structure                    | Score |
|-------------|------------|--------------------------------------|-------|
| FCFP_6      | 565998553  | <br><chem>*[C]=[*]C1=N[*][*]S</chem> | 0.357 |



|                                               |                   |                                                                                                                                                       |              |
|-----------------------------------------------|-------------------|-------------------------------------------------------------------------------------------------------------------------------------------------------|--------------|
| FCFP_6                                        | 565968762         | 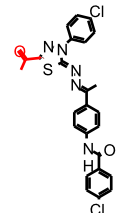<br><chem>[*]C(=[*])C(=O)C</chem>                                  | 0.266        |
| FCFP_6                                        | 1                 | <br><chem>[*]=O</chem>                                             | 0.234        |
| <b>Top Features for negative contribution</b> |                   |                                                                                                                                                       |              |
| <b>Fingerprint</b>                            | <b>Bit/Smiles</b> | <b>Feature Structure</b>                                                                                                                              | <b>Score</b> |
| FCFP_6                                        | 16                | <br><chem>[*]:[cH]:[*]</chem>                                      | -0.354       |
| FCFP_6                                        | 590925877         | <br><chem>[*]N[c](:[cH]:[*]):[cH]:[*]</chem>                     | -0.323       |
| FCFP_6                                        | 1674451008        | <br><chem>[*]N([*])[c]1:[c]([*]):[*]:[c]([*]):[cH]:[cH]:1</chem> | -0.233       |



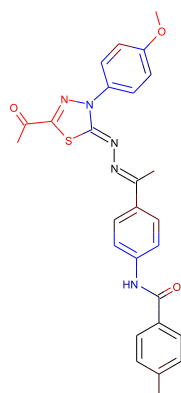

$C_{27}H_{25}N_5O_3S$

Molecular Weight: 499.58409

ALogP: 5.214

Rotatable Bonds: 7

Acceptors: 8

Donors: 1

### Model Prediction

Prediction: 0.451

Unit: mg/kg\_body\_weight/day

Mahalanobis Distance: 15.1

Mahalanobis Distance p-value: 2.14e-011

Mahalanobis Distance: The Mahalanobis distance (MD) is a generalization of the Euclidean distance that accounts for correlations among the X properties. It is calculated as the distance to the center of the training data. The larger the MD, the less trustworthy the prediction.

Mahalanobis Distance p-value: The p-value gives the fraction of training data with an MD greater than or equal to the one for the given sample, assuming normally distributed data. The smaller the p-value, the less trustworthy the prediction. For highly non-normal X properties (e.g., fingerprints), the MD p-value is wildly inaccurate.

### Structural Similar Compounds

| Name                        | C.I. direct brown 95 | FD & C violet no. 1 | 223     |
|-----------------------------|----------------------|---------------------|---------|
| Structure                   |                      |                     |         |
| Actual Endpoint (-log C)    | 5.31387              | 2.8543              | 6.29867 |
| Predicted Endpoint (-log C) | 4.30266              | 3.40838             | 7.5657  |
| Distance                    | 0.631                | 0.790               | 0.790   |
| Reference                   | CPDB                 | CPDB                | CPDB    |

### Model Applicability

Unknown features are fingerprint features in the query molecule, but not found or appearing too infrequently in the training set.

1. All properties and OPS components are within expected ranges.

### Feature Contribution

#### Top features for positive contribution

| Fingerprint | Bit/Smiles | Feature Structure | Score |
|-------------|------------|-------------------|-------|
| FCFP_6      | 136627117  | <br>[*]OC         | 0.69  |

|                                               |                   |                                                                                                                                                       |              |
|-----------------------------------------------|-------------------|-------------------------------------------------------------------------------------------------------------------------------------------------------|--------------|
| FCFP_6                                        | 565998553         | 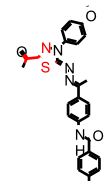<br><chem>[*]C(=O)C1=N[*]I[*]S1</chem>                             | 0.357        |
| FCFP_6                                        | 565968762         | <br><chem>[*]C(=O)C(=O)C</chem>                                    | 0.266        |
| <b>Top Features for negative contribution</b> |                   |                                                                                                                                                       |              |
| <b>Fingerprint</b>                            | <b>Bit/Smiles</b> | <b>Feature Structure</b>                                                                                                                              | <b>Score</b> |
| FCFP_6                                        | 16                | <br><chem>[*]:[cH]:[*]</chem>                                      | -0.354       |
| FCFP_6                                        | 590925877         | <br><chem>[*]N[c](:[cH]:[*]):[cH]:[*]</chem>                     | -0.323       |
| FCFP_6                                        | 1674451008        | <br><chem>[*]N([*])[c]1:[c]([*]):[*]:[c]([*]):[cH]:[cH]:1</chem> | -0.233       |



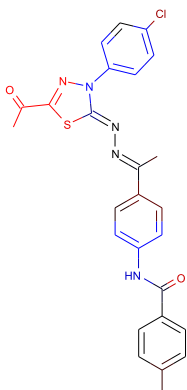

$C_{26}H_{22}ClN_5O_2S$

Molecular Weight: 504.00318

ALogP: 5.895

Rotatable Bonds: 6

Acceptors: 7

Donors: 1

### Model Prediction

Prediction: 1.5

Unit: mg/kg\_body\_weight/day

Mahalanobis Distance: 14.3

Mahalanobis Distance p-value: 3.32e-009

Mahalanobis Distance: The Mahalanobis distance (MD) is a generalization of the Euclidean distance that accounts for correlations among the X properties. It is calculated as the distance to the center of the training data. The larger the MD, the less trustworthy the prediction.

Mahalanobis Distance p-value: The p-value gives the fraction of training data with an MD greater than or equal to the one for the given sample, assuming normally distributed data. The smaller the p-value, the less trustworthy the prediction. For highly non-normal X properties (e.g., fingerprints), the MD p-value is wildly inaccurate.

### Structural Similar Compounds

| Name                        | C.I. direct brown 95 | FD & C violet no. 1 | Indomethacin |
|-----------------------------|----------------------|---------------------|--------------|
| Structure                   |                      |                     |              |
| Actual Endpoint (-log C)    | 5.31387              | 2.8543              | 5.49293      |
| Predicted Endpoint (-log C) | 4.30266              | 3.40838             | 4.9569       |
| Distance                    | 0.684                | 0.735               | 0.768        |
| Reference                   | CPDB                 | CPDB                | CPDB         |

### Model Applicability

Unknown features are fingerprint features in the query molecule, but not found or appearing too infrequently in the training set.

1. All properties and OPS components are within expected ranges.

### Feature Contribution

#### Top features for positive contribution

| Fingerprint | Bit/Smiles | Feature Structure                         | Score |
|-------------|------------|-------------------------------------------|-------|
| FCFP_6      | 565998553  | <br><chem>[*]C(=*)C1=N[*][*]S</chem><br>1 | 0.357 |

|                                               |                   |                                                                                                                                                   |              |
|-----------------------------------------------|-------------------|---------------------------------------------------------------------------------------------------------------------------------------------------|--------------|
| FCFP_6                                        | 565968762         | 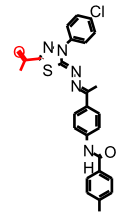<br><chem>[*]C(=[*])C(=O)C</chem>                              | 0.266        |
| FCFP_6                                        | 1                 | <br><chem>[*]=O</chem>                                         | 0.234        |
| <b>Top Features for negative contribution</b> |                   |                                                                                                                                                   |              |
| <b>Fingerprint</b>                            | <b>Bit/Smiles</b> | <b>Feature Structure</b>                                                                                                                          | <b>Score</b> |
| FCFP_6                                        | 16                | <br><chem>[*]:[cH]:[*]</chem>                                  | -0.354       |
| FCFP_6                                        | 590925877         | <br><chem>[*]N[c](:[cH]:[*]):[cH]:[*]</chem>                 | -0.323       |
| FCFP_6                                        | 1674451008        | <br><chem>[*]N([*])[c]1:[cH]:[*]:[c]([*]):[cH]:[cH]:1</chem> | -0.233       |





# Sorafenib

# TOPKAT\_Carcinogenic\_Potency\_TD50\_Rat

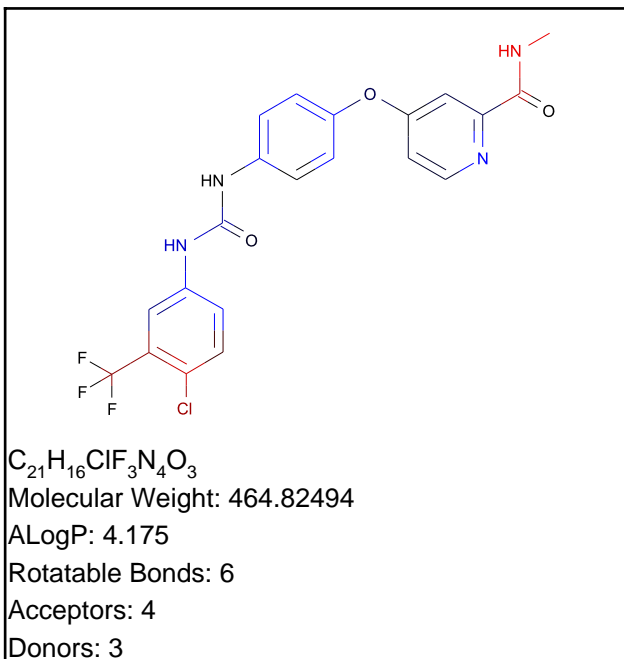

## Model Prediction

Prediction: 14.2

Unit: mg/kg\_body\_weight/day

Mahalanobis Distance: 20.4

Mahalanobis Distance p-value: 9.56e-031

Mahalanobis Distance: The Mahalanobis distance (MD) is a generalization of the Euclidean distance that accounts for correlations among the X properties. It is calculated as the distance to the center of the training data. The larger the MD, the less trustworthy the prediction.

Mahalanobis Distance p-value: The p-value gives the fraction of training data with an MD greater than or equal to the one for the given sample, assuming normally distributed data. The smaller the p-value, the less trustworthy the prediction. For highly non-normal X properties (e.g., fingerprints), the MD p-value is wildly inaccurate.

## Structural Similar Compounds

| Name                        | Fluvastatin                                                                         | 913                                                                                 | Ochratoxin A                                                                        |
|-----------------------------|-------------------------------------------------------------------------------------|-------------------------------------------------------------------------------------|-------------------------------------------------------------------------------------|
| Structure                   | 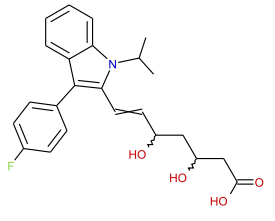 |  |  |
| Actual Endpoint (-log C)    | 3.51742                                                                             | 3.51742                                                                             | 6.47264                                                                             |
| Predicted Endpoint (-log C) | 5.41573                                                                             | 5.41573                                                                             | 5.06501                                                                             |
| Distance                    | 0.597                                                                               | 0.597                                                                               | 0.666                                                                               |
| Reference                   | CPDB                                                                                | CPDB                                                                                | CPDB                                                                                |

## Model Applicability

Unknown features are fingerprint features in the query molecule, but not found or appearing too infrequently in the training set.

- All properties and OPS components are within expected ranges.
- Unknown FCFP\_2 feature: -1029533685: [\*]:[c](:[\*])C(F)(F)F

## Feature Contribution

### Top features for positive contribution

| Fingerprint | Bit/Smiles | Feature Structure                                                                              | Score |
|-------------|------------|------------------------------------------------------------------------------------------------|-------|
| FCFP_6      | 1          | 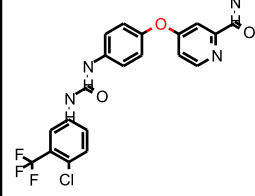<br>[*]=O | 0.234 |

|                                               |                   |                                                                                                                                      |              |
|-----------------------------------------------|-------------------|--------------------------------------------------------------------------------------------------------------------------------------|--------------|
| FCFP_6                                        | -885550502        | 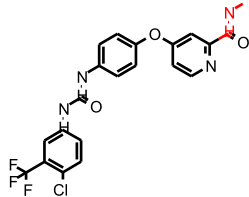<br>[*]C(=[*])NC                                  | 0.229        |
| FCFP_6                                        | 32                | <br>[*]Cl                                         | 0.154        |
| <b>Top Features for negative contribution</b> |                   |                                                                                                                                      |              |
| <b>Fingerprint</b>                            | <b>Bit/Smiles</b> | <b>Feature Structure</b>                                                                                                             | <b>Score</b> |
| FCFP_6                                        | 16                | <br>[*]:[cH]:[*]                                  | -0.354       |
| FCFP_6                                        | 590925877         | <br>[*]N[c](:[cH]:[*]):[cH]:[*]                 | -0.323       |
| FCFP_6                                        | 1674451008        | <br>[*]N([*])[c]1:[cH]:[*]:[c]([*]):[cH]:[cH]:1 | -0.233       |



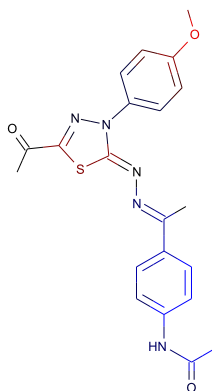

$C_{21}H_{21}N_5O_3S$

Molecular Weight: 423.48813

ALogP: 3.064

Rotatable Bonds: 6

Acceptors: 8

Donors: 1

### Model Prediction

Prediction: 0.0341

Unit: g/kg\_body\_weight

Mahalanobis Distance: 30.9

Mahalanobis Distance p-value: 2.16e-026

Mahalanobis Distance: The Mahalanobis distance (MD) is a generalization of the Euclidean distance that accounts for correlations among the X properties. It is calculated as the distance to the center of the training data. The larger the MD, the less trustworthy the prediction.

Mahalanobis Distance p-value: The p-value gives the fraction of training data with an MD greater than or equal to the one for the given sample, assuming normally distributed data. The smaller the p-value, the less trustworthy the prediction. For highly non-normal X properties (e.g., fingerprints), the MD p-value is wildly inaccurate.

### Structural Similar Compounds

| Name                        | DILTIAZEM | CHLORSULFURON                   | PENICILLIN VK    |
|-----------------------------|-----------|---------------------------------|------------------|
| Structure                   |           |                                 |                  |
| Actual Endpoint (-log C)    | 4.21961   | 4.15566                         | 2.99188          |
| Predicted Endpoint (-log C) | 4.005     | 3.79771                         | 4.18433          |
| Distance                    | 0.596     | 0.659                           | 0.677            |
| Reference                   | NDA-18602 | EPA COVER SHEET 0027;880301;(1) | NTP REPORT # 336 |

### Model Applicability

Unknown features are fingerprint features in the query molecule, but not found or appearing too infrequently in the training set.

1. OPS PC32 out of range. Value: 4.5485. Training min, max, SD, explained variance: -4.2021, 4.2975, 1.228, 0.0066.
2. Unknown ECFP\_6 feature: 912478223: [\*]S[\*]
3. Unknown ECFP\_6 feature: -175146122: [\*]C(=[\*])[c](:[cH]:[\*]):[cH]:[\*]
4. Unknown ECFP\_6 feature: -177077903: [\*]N[c](:[cH]:[\*]):[cH]:[\*]
5. Unknown ECFP\_6 feature: 128986386: [\*]N=C(/C)\[c](:[\*]):[\*]
6. Unknown ECFP\_6 feature: -474544785: [\*]NC(=O)C
7. Unknown ECFP\_6 feature: 562081661: [\*]C(=NN=[\*])[\*]
8. Unknown ECFP\_6 feature: -819426257: [\*]C(=NN=[\*])[\*]
9. Unknown ECFP\_6 feature: 189949281: [\*]N=C\1/S[\*]=[\*]N1[\*]
10. Unknown ECFP\_6 feature: 2122741631: [\*]C1=[\*][\*]C(=[\*])S1
11. Unknown ECFP\_6 feature: -934225701: [\*]C(=[\*])C1=N[\*][\*]S1
12. Unknown ECFP\_6 feature: 2092245922: [\*]N1[\*][\*]C(=N1)[\*]
13. Unknown ECFP\_6 feature: -1110911409: [\*]=C1[\*][\*]=NN1[c](:[\*]):[\*]
14. Unknown ECFP\_6 feature: -175021654: [\*]N([\*])[c](:[cH]:[\*]):[cH]:[\*]
15. Unknown ECFP\_6 feature: 129482634: [\*]C(=[\*])C(=O)C
16. Unknown ECFP\_6 feature: 1307307440: [\*]:[c](:[\*])OC

### Feature Contribution

| Top features for positive contribution |             |                                                                                                                                      |        |
|----------------------------------------|-------------|--------------------------------------------------------------------------------------------------------------------------------------|--------|
| Fingerprint                            | Bit/Smiles  | Feature Structure                                                                                                                    | Score  |
| FCFP_6                                 | -1143715940 | 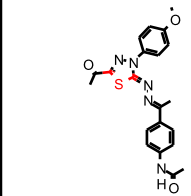<br><chem>[*]C1=[*][*]C(=[*])S1</chem>            | 0.13   |
| ECFP_6                                 | -176455838  | <br><chem>[*]O[e]([cH]:[*]):[cH]:[*]H]:[*]</chem> | 0.106  |
| FCFP_6                                 | 3           | <br><chem>[*]N[*]</chem>                          | 0.0924 |
| Top Features for negative contribution |             |                                                                                                                                      |        |
| Fingerprint                            | Bit/Smiles  | Feature Structure                                                                                                                    | Score  |
| FCFP_6                                 | 1           | <br><chem>[*]=O</chem>                          | -0.102 |

|               |                    |                                                                                                                                                      |                |
|---------------|--------------------|------------------------------------------------------------------------------------------------------------------------------------------------------|----------------|
| <p>ECFP_6</p> | <p>-1087070950</p> | 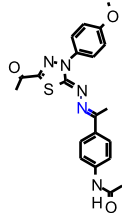 <p>[*]N=[*]</p>                                                  | <p>-0.102</p>  |
| <p>FCFP_6</p> | <p>-453677277</p>  |  <p>[*]C(=[*])[c]1:[cH]1<br/> [*]:[c]([*]):[cH]:[cH]<br/> ]:1</p> | <p>-0.0906</p> |

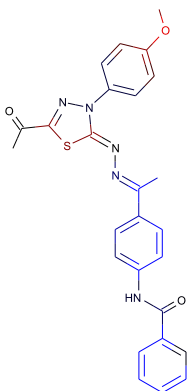

$C_{26}H_{23}N_5O_3S$

Molecular Weight: 485.55751

ALogP: 4.728

Rotatable Bonds: 7

Acceptors: 8

Donors: 1

### Model Prediction

Prediction: 0.0407

Unit: g/kg\_body\_weight

Mahalanobis Distance: 31.3

Mahalanobis Distance p-value: 5.06e-027

Mahalanobis Distance: The Mahalanobis distance (MD) is a generalization of the Euclidean distance that accounts for correlations among the X properties. It is calculated as the distance to the center of the training data. The larger the MD, the less trustworthy the prediction.

Mahalanobis Distance p-value: The p-value gives the fraction of training data with an MD greater than or equal to the one for the given sample, assuming normally distributed data. The smaller the p-value, the less trustworthy the prediction. For highly non-normal X properties (e.g., fingerprints), the MD p-value is wildly inaccurate.

### Structural Similar Compounds

| Name                        | DILTIAZEM | RESERPINE  | C.I.PIGMENT RED 23 |
|-----------------------------|-----------|------------|--------------------|
| Structure                   |           |            |                    |
| Actual Endpoint (-log C)    | 4.21961   | 6.38645    | 2.28997            |
| Predicted Endpoint (-log C) | 4.005     | 5.548      | 3.52921            |
| Distance                    | 0.706     | 0.710      | 0.746              |
| Reference                   | NDA-18602 | NTP 193 22 | NTP 411 146        |

### Model Applicability

Unknown features are fingerprint features in the query molecule, but not found or appearing too infrequently in the training set.

- OPS PC32 out of range. Value: 4.3704. Training min, max, SD, explained variance: -4.2021, 4.2975, 1.228, 0.0066.
- Unknown ECFP\_6 feature: 912478223: [\*]S[\*]
- Unknown ECFP\_6 feature: -175146122: [\*]C(=[\*])[c](:[cH]:[\*]):[cH]:[\*]
- Unknown ECFP\_6 feature: -177077903: [\*]N[c](:[cH]:[\*]):[cH]:[\*]
- Unknown ECFP\_6 feature: 128986386: [\*]N=C(/C)\[c](:[\*]):[\*]
- Unknown ECFP\_6 feature: 1997021792: [\*]:[cH]:[cH]:[cH]:[\*]
- Unknown ECFP\_6 feature: 1430169877: [\*]NC(=O)[c](:[\*]):[\*]
- Unknown ECFP\_6 feature: 562081661: [\*]C(=NN=[\*])[\*]
- Unknown ECFP\_6 feature: -819426257: [\*]C(=NN=[\*])[\*]
- Unknown ECFP\_6 feature: 189949281: [\*]N=C\1/S[\*]=[\*]N1[\*]
- Unknown ECFP\_6 feature: 2122741631: [\*]C1=[\*][\*]C(=[\*])S1
- Unknown ECFP\_6 feature: -934225701: [\*]C(=[\*])C1=N[\*][\*]S1
- Unknown ECFP\_6 feature: 2092245922: [\*]N1[\*][\*]C(=N1)[\*]
- Unknown ECFP\_6 feature: -1110911409: [\*]=C1[\*][\*]=NN1[c](:[\*]):[\*]
- Unknown ECFP\_6 feature: -175021654: [\*]N([\*])[c](:[cH]:[\*]):[cH]:[\*]
- Unknown ECFP\_6 feature: 129482634: [\*]C(=[\*])C(=O)C
- Unknown ECFP\_6 feature: 1307307440: [\*]:[c](:[\*])OC

### Feature Contribution

| Top features for positive contribution |             |                                                                                                                                         |        |
|----------------------------------------|-------------|-----------------------------------------------------------------------------------------------------------------------------------------|--------|
| Fingerprint                            | Bit/Smiles  | Feature Structure                                                                                                                       | Score  |
| FCFP_6                                 | -1143715940 | <br><chem>[*]C1=[*][*]C(=[*])S1</chem>               | 0.13   |
| ECFP_6                                 | -176455838  | <br><chem>[*]O[e](:[cH]:[*]):[cH]:[*]</chem>         | 0.106  |
| FCFP_6                                 | 3           | <br><chem>[*]N[*]</chem>                             | 0.0924 |
| Top Features for negative contribution |             |                                                                                                                                         |        |
| Fingerprint                            | Bit/Smiles  | Feature Structure                                                                                                                       | Score  |
| FCFP_6                                 | 991735244   | <br><chem>[*][c]1:[*]:[cH]:[cH]:[cH]:[cH]:1</chem> | -0.134 |



|        |            |                                                                                                                          |        |
|--------|------------|--------------------------------------------------------------------------------------------------------------------------|--------|
| ECFP_6 | 1564392544 | 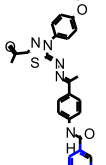<br>[*][c]1:[*]:[cH]:[cH]:[cH]:[cH]:1 | -0.133 |
| FCFP_6 | 1          | <br>[*]=O                             | -0.102 |

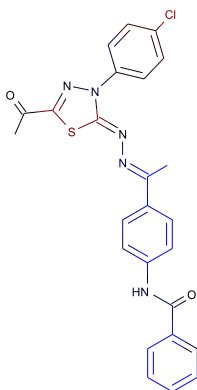

$C_{25}H_{20}ClN_5O_2S$

Molecular Weight: 489.97659

ALogP: 5.409

Rotatable Bonds: 6

Acceptors: 7

Donors: 1

### Model Prediction

Prediction: 0.0654

Unit: g/kg\_body\_weight

Mahalanobis Distance: 31.8

Mahalanobis Distance p-value: 7.4e-028

Mahalanobis Distance: The Mahalanobis distance (MD) is a generalization of the Euclidean distance that accounts for correlations among the X properties. It is calculated as the distance to the center of the training data. The larger the MD, the less trustworthy the prediction.

Mahalanobis Distance p-value: The p-value gives the fraction of training data with an MD greater than or equal to the one for the given sample, assuming normally distributed data. The smaller the p-value, the less trustworthy the prediction. For highly non-normal X properties (e.g., fingerprints), the MD p-value is wildly inaccurate.

### Structural Similar Compounds

| Name                        | FLUVALINATE                     | D & C RED 9      | ASSURE                          |
|-----------------------------|---------------------------------|------------------|---------------------------------|
| Structure                   |                                 |                  |                                 |
| Actual Endpoint (-log C)    | 5.30356                         | 3.87715          | 5.00328                         |
| Predicted Endpoint (-log C) | 4.89944                         | 3.6546           | 4.27671                         |
| Distance                    | 0.707                           | 0.720            | 0.726                           |
| Reference                   | EPA COVER SHEET 0281;880630;(1) | NTP REPORT # 225 | EPA COVER SHEET 0335;891001;(1) |

### Model Applicability

Unknown features are fingerprint features in the query molecule, but not found or appearing too infrequently in the training set.

1. All properties and OPS components are within expected ranges.
2. Unknown ECFP\_6 feature: 912478223: [\*]S[\*]
3. Unknown ECFP\_6 feature: -175146122: [\*]C(=[\*])[c](:[cH]:[\*]):[cH]:[\*]
4. Unknown ECFP\_6 feature: -177077903: [\*]N[c](:[cH]:[\*]):[cH]:[\*]
5. Unknown ECFP\_6 feature: 128986386: [\*]N=C(/C)\[c](:[\*]):[\*]
6. Unknown ECFP\_6 feature: 1997021792: [\*]:[cH]:[cH]:[cH]:[\*]
7. Unknown ECFP\_6 feature: 1430169877: [\*]NC(=O)[c](:[\*]):[\*]
8. Unknown ECFP\_6 feature: 562081661: [\*]C(=NN=[\*])[\*]
9. Unknown ECFP\_6 feature: -819426257: [\*]C(=NN=[\*])[\*]
10. Unknown ECFP\_6 feature: 189949281: [\*]N=C\1/S[\*]=[\*]N1[\*]
11. Unknown ECFP\_6 feature: 2122741631: [\*]C1=[\*][\*]C(=[\*])S1
12. Unknown ECFP\_6 feature: -934225701: [\*]C(=[\*])C1=N[\*][\*]S1
13. Unknown ECFP\_6 feature: 2092245922: [\*]N1[\*][\*]C(=N1)[\*]
14. Unknown ECFP\_6 feature: -1110911409: [\*]=C1[\*][\*]=NN1[c](:[\*]):[\*]
15. Unknown ECFP\_6 feature: -175021654: [\*]N([\*])[c](:[cH]:[\*]):[cH]:[\*]
16. Unknown ECFP\_6 feature: 129482634: [\*]C(=[\*])C(=O)C
17. Unknown ECFP\_6 feature: -176494269: [\*]:[cH]:[c](Cl):[cH]:[\*]
18. Unknown ECFP\_6 feature: 99947387: [\*]:[c](:[\*])Cl

## Feature Contribution

| Top features for positive contribution |             |                                                                                                                                                   |        |
|----------------------------------------|-------------|---------------------------------------------------------------------------------------------------------------------------------------------------|--------|
| Fingerprint                            | Bit/Smiles  | Feature Structure                                                                                                                                 | Score  |
| FCFP_6                                 | -1143715940 | 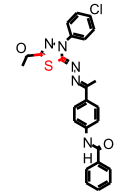<br><chem>[*]C1=[*][*]C(=[*])S1</chem>                         | 0.13   |
| FCFP_6                                 | 32          | <br><chem>[*]Cl</chem>                                         | 0.101  |
| FCFP_6                                 | 3           | <br><chem>[*]N[*]</chem>                                       | 0.0924 |
| Top Features for negative contribution |             |                                                                                                                                                   |        |
| Fingerprint                            | Bit/Smiles  | Feature Structure                                                                                                                                 | Score  |
| FCFP_6                                 | 991735244   | <br><chem>[*][c]1:[*]:[cH]:[cH]:[cH]:[cH]:[cH]:[cH]:1</chem> | -0.134 |

|               |                   |                                                                                                                                             |               |
|---------------|-------------------|---------------------------------------------------------------------------------------------------------------------------------------------|---------------|
| <p>ECFP_6</p> | <p>1564392544</p> | 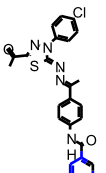 <p> <chem>[*][c]1:[*]:[cH]:[cH]:[cH]:[cH]:1</chem> </p> | <p>-0.133</p> |
| <p>FCFP_6</p> | <p>1</p>          |  <p> <chem>[*]=O</chem> </p>                             | <p>-0.102</p> |

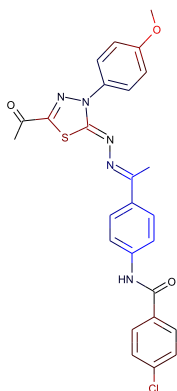

$C_{26}H_{22}ClN_5O_3S$

Molecular Weight: 520.00258

ALogP: 5.392

Rotatable Bonds: 7

Acceptors: 8

Donors: 1

### Model Prediction

Prediction: 0.013

Unit: g/kg\_body\_weight

Mahalanobis Distance: 31.3

Mahalanobis Distance p-value: 4.19e-027

Mahalanobis Distance: The Mahalanobis distance (MD) is a generalization of the Euclidean distance that accounts for correlations among the X properties. It is calculated as the distance to the center of the training data. The larger the MD, the less trustworthy the prediction.

Mahalanobis Distance p-value: The p-value gives the fraction of training data with an MD greater than or equal to the one for the given sample, assuming normally distributed data. The smaller the p-value, the less trustworthy the prediction. For highly non-normal X properties (e.g., fingerprints), the MD p-value is wildly inaccurate.

### Structural Similar Compounds

| Name                        | RESERPINE  | FLUVALINATE                     | C.I.PIGMENT RED 23 |
|-----------------------------|------------|---------------------------------|--------------------|
| Structure                   |            |                                 |                    |
| Actual Endpoint (-log C)    | 6.38645    | 5.30356                         | 2.28997            |
| Predicted Endpoint (-log C) | 5.548      | 4.89944                         | 3.52921            |
| Distance                    | 0.695      | 0.729                           | 0.755              |
| Reference                   | NTP 193 22 | EPA COVER SHEET 0281;880630;(1) | NTP 411 146        |

### Model Applicability

Unknown features are fingerprint features in the query molecule, but not found or appearing too infrequently in the training set.

1. All properties and OPS components are within expected ranges.
2. Unknown ECFP\_6 feature: 912478223: [\*]S[\*]
3. Unknown ECFP\_6 feature: -175146122: [\*]C(=[\*])[c](:[cH]:[\*]):[cH]:[\*]
4. Unknown ECFP\_6 feature: -177077903: [\*]N[c](:[cH]:[\*]):[cH]:[\*]
5. Unknown ECFP\_6 feature: 128986386: [\*]N=C(/C)\[c](:[\*]):[\*]
6. Unknown ECFP\_6 feature: -176494269: [\*]:[cH]:[c](Cl):[cH]:[\*]
7. Unknown ECFP\_6 feature: 1430169877: [\*]NC(=O)[c](:[\*]):[\*]
8. Unknown ECFP\_6 feature: 562081661: [\*]C(=NN=[\*])[\*]
9. Unknown ECFP\_6 feature: -819426257: [\*]C(=NN=[\*])[\*]
10. Unknown ECFP\_6 feature: 189949281: [\*]N=C\1/S[\*]=[\*]N1[\*]
11. Unknown ECFP\_6 feature: 2122741631: [\*]C1=[\*][\*]C(=[\*])S1
12. Unknown ECFP\_6 feature: -934225701: [\*]C(=[\*])C1=N[\*][\*]S1
13. Unknown ECFP\_6 feature: 2092245922: [\*]N1[\*][\*]C(=N1)[\*]
14. Unknown ECFP\_6 feature: -1110911409: [\*]=C1[\*][\*]=NN1[c](:[\*]):[\*]
15. Unknown ECFP\_6 feature: -175021654: [\*]N([\*])[c](:[cH]:[\*]):[cH]:[\*]
16. Unknown ECFP\_6 feature: 129482634: [\*]C(=[\*])C(=O)C
17. Unknown ECFP\_6 feature: 99947387: [\*]:[c](:[\*])Cl
18. Unknown ECFP\_6 feature: 1307307440: [\*]:[c](:[\*])OC

## Feature Contribution

| Top features for positive contribution |             |                                                                                                                                 |        |
|----------------------------------------|-------------|---------------------------------------------------------------------------------------------------------------------------------|--------|
| Fingerprint                            | Bit/Smiles  | Feature Structure                                                                                                               | Score  |
| FCFP_6                                 | -1143715940 | 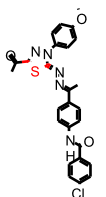<br><chem>[*]C1=[*][*]C(=[*])S1</chem>       | 0.13   |
| ECFP_6                                 | -176455838  | <br><chem>[*]O[c](:[cH]:[*])[:cH]:[*]</chem> | 0.106  |
| FCFP_6                                 | 32          | <br><chem>[*]Cl</chem>                       | 0.101  |
| Top Features for negative contribution |             |                                                                                                                                 |        |
| Fingerprint                            | Bit/Smiles  | Feature Structure                                                                                                               | Score  |
| FCFP_6                                 | 1           | <br><chem>[*]=O</chem>                     | -0.102 |

|               |                    |                                                                                                                                                  |                |
|---------------|--------------------|--------------------------------------------------------------------------------------------------------------------------------------------------|----------------|
| <p>ECFP_6</p> | <p>-1087070950</p> | 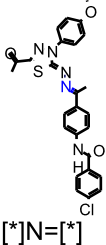 <p>[*]N=[*]</p>                                              | <p>-0.102</p>  |
| <p>FCFP_6</p> | <p>-453677277</p>  |  <p>[*]C(=[*])[c]1:[cH]<br/>*]:[c]([*]):[cH]:[cH]<br/>]:1</p> | <p>-0.0906</p> |

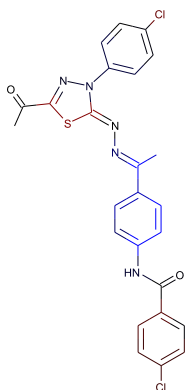

$C_{25}H_{19}Cl_2N_5O_2S$

Molecular Weight: 524.42166

ALogP: 6.073

Rotatable Bonds: 6

Acceptors: 7

Donors: 1

### Model Prediction

Prediction: 0.0299

Unit: g/kg\_body\_weight

Mahalanobis Distance: 30.9

Mahalanobis Distance p-value: 3.23e-026

Mahalanobis Distance: The Mahalanobis distance (MD) is a generalization of the Euclidean distance that accounts for correlations among the X properties. It is calculated as the distance to the center of the training data. The larger the MD, the less trustworthy the prediction.

Mahalanobis Distance p-value: The p-value gives the fraction of training data with an MD greater than or equal to the one for the given sample, assuming normally distributed data. The smaller the p-value, the less trustworthy the prediction. For highly non-normal X properties (e.g., fingerprints), the MD p-value is wildly inaccurate.

### Structural Similar Compounds

| Name                        | FLUVALINATE                        | RHODAMINE 6G | D & C RED 9      |
|-----------------------------|------------------------------------|--------------|------------------|
| Structure                   |                                    |              |                  |
| Actual Endpoint (-log C)    | 5.30356                            | 4.54906      | 3.87715          |
| Predicted Endpoint (-log C) | 4.89944                            | 4.6787       | 3.6546           |
| Distance                    | 0.693                              | 0.747        | 0.763            |
| Reference                   | EPA COVER SHEET<br>0281;880630;(1) | NTP 364 39   | NTP REPORT # 225 |

### Model Applicability

Unknown features are fingerprint features in the query molecule, but not found or appearing too infrequently in the training set.

1. All properties and OPS components are within expected ranges.
2. Unknown ECFP\_6 feature: 912478223: [\*]S[\*]
3. Unknown ECFP\_6 feature: -175146122: [\*]C(=[\*])[c](:[cH]:[\*]):[cH]:[\*]
4. Unknown ECFP\_6 feature: -177077903: [\*]N[c](:[cH]:[\*]):[cH]:[\*]
5. Unknown ECFP\_6 feature: 128986386: [\*]N=C(/C)\[c](:[\*]):[\*]
6. Unknown ECFP\_6 feature: -176494269: [\*]:[cH]:[c](Cl):[cH]:[\*]
7. Unknown ECFP\_6 feature: 1430169877: [\*]NC(=O)[c](:[\*]):[\*]
8. Unknown ECFP\_6 feature: 562081661: [\*]C(=NN=[\*])[\*]
9. Unknown ECFP\_6 feature: -819426257: [\*]C(=NN=[\*])[\*]
10. Unknown ECFP\_6 feature: 189949281: [\*]N=C\1/S[\*]=[\*]N1[\*]
11. Unknown ECFP\_6 feature: 2122741631: [\*]C1=[\*][\*]C(=[\*])S1
12. Unknown ECFP\_6 feature: -934225701: [\*]C(=[\*])C1=N[\*][\*]S1
13. Unknown ECFP\_6 feature: 2092245922: [\*]N1[\*][\*]C(=N1)[\*]
14. Unknown ECFP\_6 feature: -1110911409: [\*]=C1[\*][\*]=NN1[c](:[\*]):[\*]
15. Unknown ECFP\_6 feature: -175021654: [\*]N([\*])[c](:[cH]:[\*]):[cH]:[\*]
16. Unknown ECFP\_6 feature: 129482634: [\*]C(=[\*])C(=O)C
17. Unknown ECFP\_6 feature: 99947387: [\*]:[c](:[\*])Cl

### Feature Contribution



| Top features for positive contribution |             |                                                                                                                           |        |
|----------------------------------------|-------------|---------------------------------------------------------------------------------------------------------------------------|--------|
| Fingerprint                            | Bit/Smiles  | Feature Structure                                                                                                         | Score  |
| FCFP_6                                 | -1143715940 | 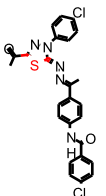<br><chem>[*]C1=[*][*]C(=[*])S1</chem> | 0.13   |
| FCFP_6                                 | 32          | <br><chem>[*]Cl</chem>                 | 0.101  |
| FCFP_6                                 | 3           | <br><chem>[*]N[*]</chem>               | 0.0924 |
| Top Features for negative contribution |             |                                                                                                                           |        |
| Fingerprint                            | Bit/Smiles  | Feature Structure                                                                                                         | Score  |
| FCFP_6                                 | 1           | <br><chem>[*]=O</chem>               | -0.102 |

|               |                    |                                                                                                                                                  |                |
|---------------|--------------------|--------------------------------------------------------------------------------------------------------------------------------------------------|----------------|
| <p>ECFP_6</p> | <p>-1087070950</p> | 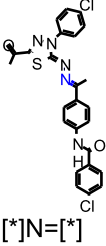 <p>[*]N=[*]</p>                                              | <p>-0.102</p>  |
| <p>FCFP_6</p> | <p>-453677277</p>  |  <p>[*]C(=[*])[c]1:[cH]<br/>*]:[c]([*]):[cH]:[cH]<br/>]:1</p> | <p>-0.0906</p> |

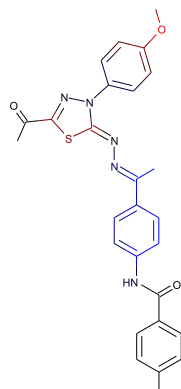

$C_{27}H_{25}N_5O_3S$

Molecular Weight: 499.58409

ALogP: 5.214

Rotatable Bonds: 7

Acceptors: 8

Donors: 1

### Model Prediction

Prediction: 0.018

Unit: g/kg\_body\_weight

Mahalanobis Distance: 31

Mahalanobis Distance p-value: 2.12e-026

Mahalanobis Distance: The Mahalanobis distance (MD) is a generalization of the Euclidean distance that accounts for correlations among the X properties. It is calculated as the distance to the center of the training data. The larger the MD, the less trustworthy the prediction.

Mahalanobis Distance p-value: The p-value gives the fraction of training data with an MD greater than or equal to the one for the given sample, assuming normally distributed data. The smaller the p-value, the less trustworthy the prediction. For highly non-normal X properties (e.g., fingerprints), the MD p-value is wildly inaccurate.

### Structural Similar Compounds

| Name                        | RESERPINE  | DILTIAZEM | C.I.PIGMENT RED 23 |
|-----------------------------|------------|-----------|--------------------|
| Structure                   |            |           |                    |
| Actual Endpoint (-log C)    | 6.38645    | 4.21961   | 2.28997            |
| Predicted Endpoint (-log C) | 5.548      | 4.005     | 3.52921            |
| Distance                    | 0.698      | 0.740     | 0.747              |
| Reference                   | NTP 193 22 | NDA-18602 | NTP 411 146        |

### Model Applicability

Unknown features are fingerprint features in the query molecule, but not found or appearing too infrequently in the training set.

- All properties and OPS components are within expected ranges.
- Unknown ECFP\_6 feature: 912478223: [\*]S[\*]
- Unknown ECFP\_6 feature: -175146122: [\*]C(=[\*])[c](:[cH]:[\*]):[cH]:[\*]
- Unknown ECFP\_6 feature: -177077903: [\*]N[c](:[cH]:[\*]):[cH]:[\*]
- Unknown ECFP\_6 feature: 128986386: [\*]N=C(/C)\[c](:[\*]):[\*]
- Unknown ECFP\_6 feature: -179515162: [\*]:[cH]:[c](C):[cH]:[\*]
- Unknown ECFP\_6 feature: 1430169877: [\*]NC(=O)[c](:[\*]):[\*]
- Unknown ECFP\_6 feature: 562081661: [\*]C(=NN=[\*])[\*]
- Unknown ECFP\_6 feature: -819426257: [\*]C(=NN=[\*])[\*]
- Unknown ECFP\_6 feature: 189949281: [\*]N=C\1/S[\*]=[\*]N1[\*]
- Unknown ECFP\_6 feature: 2122741631: [\*]C1=[\*][\*]C(=[\*])S1
- Unknown ECFP\_6 feature: -934225701: [\*]C(=[\*])C1=N[\*][\*]S1
- Unknown ECFP\_6 feature: 2092245922: [\*]N1[\*][\*]C(=N1)[\*]
- Unknown ECFP\_6 feature: -1110911409: [\*]=C1[\*][\*]=NN1[c](:[\*]):[\*]
- Unknown ECFP\_6 feature: -175021654: [\*]N([\*])[c](:[cH]:[\*]):[cH]:[\*]
- Unknown ECFP\_6 feature: 129482634: [\*]C(=[\*])C(=O)C
- Unknown ECFP\_6 feature: 1307307440: [\*]:[c](:[\*])OC

### Feature Contribution

| Top features for positive contribution |             |                                                                                                                                 |        |
|----------------------------------------|-------------|---------------------------------------------------------------------------------------------------------------------------------|--------|
| Fingerprint                            | Bit/Smiles  | Feature Structure                                                                                                               | Score  |
| FCFP_6                                 | -1143715940 | 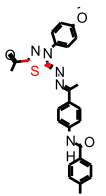<br><chem>[*]C1=[*][*]C(=[*])S1</chem>       | 0.13   |
| ECFP_6                                 | -176455838  | <br><chem>[*]O[e](:[cH]:[*]):[cH]:[*]</chem> | 0.106  |
| FCFP_6                                 | 3           | <br><chem>[*]N[*]</chem>                     | 0.0924 |
| Top Features for negative contribution |             |                                                                                                                                 |        |
| Fingerprint                            | Bit/Smiles  | Feature Structure                                                                                                               | Score  |
| FCFP_6                                 | 1           | <br><chem>[*]=O</chem>                     | -0.102 |

|        |             |                                                                                                                                              |         |
|--------|-------------|----------------------------------------------------------------------------------------------------------------------------------------------|---------|
| ECFP_6 | -1087070950 | 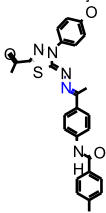<br>[*]N=[*]                                              | -0.102  |
| FCFP_6 | -453677277  | <br>[*]C(=[*])[c]1:[cH]1<br>[*]:[c]([*]):[cH]:[cH]<br>]:1 | -0.0906 |

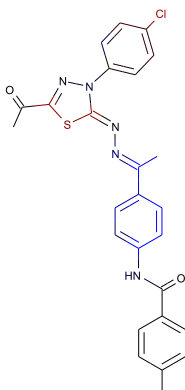

$C_{26}H_{22}ClN_5O_2S$

Molecular Weight: 504.00318

ALogP: 5.895

Rotatable Bonds: 6

Acceptors: 7

Donors: 1

### Model Prediction

Prediction: 0.0289

Unit: g/kg\_body\_weight

Mahalanobis Distance: 31

Mahalanobis Distance p-value: 1.86e-026

Mahalanobis Distance: The Mahalanobis distance (MD) is a generalization of the Euclidean distance that accounts for correlations among the X properties. It is calculated as the distance to the center of the training data. The larger the MD, the less trustworthy the prediction.

Mahalanobis Distance p-value: The p-value gives the fraction of training data with an MD greater than or equal to the one for the given sample, assuming normally distributed data. The smaller the p-value, the less trustworthy the prediction. For highly non-normal X properties (e.g., fingerprints), the MD p-value is wildly inaccurate.

### Structural Similar Compounds

| Name                        | FLUVALINATE                        | RHODAMINE 6G | D & C RED 9      |
|-----------------------------|------------------------------------|--------------|------------------|
| Structure                   |                                    |              |                  |
| Actual Endpoint (-log C)    | 5.30356                            | 4.54906      | 3.87715          |
| Predicted Endpoint (-log C) | 4.89944                            | 4.6787       | 3.6546           |
| Distance                    | 0.698                              | 0.735        | 0.745            |
| Reference                   | EPA COVER SHEET<br>0281;880630;(1) | NTP 364 39   | NTP REPORT # 225 |

### Model Applicability

Unknown features are fingerprint features in the query molecule, but not found or appearing too infrequently in the training set.

1. All properties and OPS components are within expected ranges.
2. Unknown ECFP\_6 feature: 912478223: [\*]S[\*]
3. Unknown ECFP\_6 feature: -175146122: [\*]C(=[\*])[c](:[cH]:[\*]):[cH]:[\*]
4. Unknown ECFP\_6 feature: -177077903: [\*]N[c](:[cH]:[\*]):[cH]:[\*]
5. Unknown ECFP\_6 feature: 128986386: [\*]N=C(/C)\[c](:[\*]):[\*]
6. Unknown ECFP\_6 feature: -179515162: [\*]:[cH]:[c](C):[cH]:[\*]
7. Unknown ECFP\_6 feature: 1430169877: [\*]NC(=O)[c](:[\*]):[\*]
8. Unknown ECFP\_6 feature: 562081661: [\*]C(=NN=[\*])[\*]
9. Unknown ECFP\_6 feature: -819426257: [\*]C(=NN=[\*])[\*]
10. Unknown ECFP\_6 feature: 189949281: [\*]N=C\1/S[\*]=[\*]N1[\*]
11. Unknown ECFP\_6 feature: 2122741631: [\*]C1=[\*][\*]C(=[\*])S1
12. Unknown ECFP\_6 feature: -934225701: [\*]C(=[\*])C1=N[\*][\*]S1
13. Unknown ECFP\_6 feature: 2092245922: [\*]N1[\*][\*]C(=N1)[\*]
14. Unknown ECFP\_6 feature: -1110911409: [\*]=C1[\*][\*]=NN1[c](:[\*]):[\*]
15. Unknown ECFP\_6 feature: -175021654: [\*]N([\*])[c](:[cH]:[\*]):[cH]:[\*]
16. Unknown ECFP\_6 feature: 129482634: [\*]C(=[\*])C(=O)C
17. Unknown ECFP\_6 feature: -176494269: [\*]:[cH]:[c](Cl):[cH]:[\*]
18. Unknown ECFP\_6 feature: 99947387: [\*]:[c](:[\*])Cl

## Feature Contribution

| Top features for positive contribution |             |                                                                                                                           |        |
|----------------------------------------|-------------|---------------------------------------------------------------------------------------------------------------------------|--------|
| Fingerprint                            | Bit/Smiles  | Feature Structure                                                                                                         | Score  |
| FCFP_6                                 | -1143715940 | 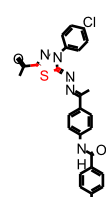<br><chem>[*]C1=[*][*]C(=[*])S1</chem> | 0.13   |
| FCFP_6                                 | 32          | <br><chem>[*]Cl</chem>                 | 0.101  |
| FCFP_6                                 | 3           | <br><chem>[*]N[*]</chem>               | 0.0924 |
| Top Features for negative contribution |             |                                                                                                                           |        |
| Fingerprint                            | Bit/Smiles  | Feature Structure                                                                                                         | Score  |
| FCFP_6                                 | 1           | <br><chem>[*]=O</chem>               | -0.102 |

|               |                    |                                                                                                                                                   |                |
|---------------|--------------------|---------------------------------------------------------------------------------------------------------------------------------------------------|----------------|
| <p>ECFP_6</p> | <p>-1087070950</p> | 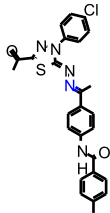 <p>[*]N=[*]</p>                                               | <p>-0.102</p>  |
| <p>FCFP_6</p> | <p>-453677277</p>  |  <p>[*]C(=[*])[c]1:[cH]1<br/>*]:[c]([*]):[cH]:[cH]<br/>]:1</p> | <p>-0.0906</p> |



# Sorafenib

# TOPKAT\_Chronic\_LOAEL

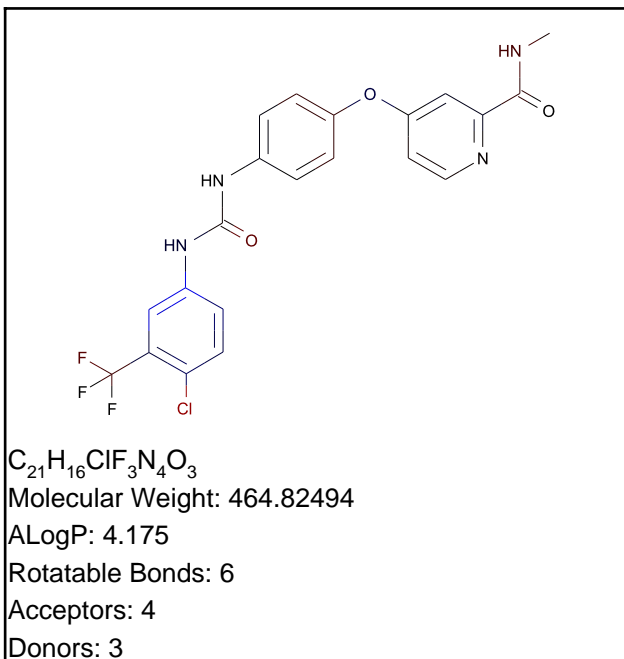

## Model Prediction

Prediction: 0.00483

Unit: g/kg\_body\_weight

Mahalanobis Distance: 30

Mahalanobis Distance p-value: 1.21e-024

Mahalanobis Distance: The Mahalanobis distance (MD) is a generalization of the Euclidean distance that accounts for correlations among the X properties. It is calculated as the distance to the center of the training data. The larger the MD, the less trustworthy the prediction.

Mahalanobis Distance p-value: The p-value gives the fraction of training data with an MD greater than or equal to the one for the given sample, assuming normally distributed data. The smaller the p-value, the less trustworthy the prediction. For highly non-normal X properties (e.g., fingerprints), the MD p-value is wildly inaccurate.

## Structural Similar Compounds

| Name                        | GLYBURIDE                                                                           | D & C RED 9                                                                         | SODIUM ACIFLUORFEN                                                                  |
|-----------------------------|-------------------------------------------------------------------------------------|-------------------------------------------------------------------------------------|-------------------------------------------------------------------------------------|
| Structure                   | 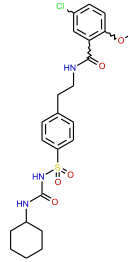 |  |  |
| Actual Endpoint (-log C)    | 4.21661                                                                             | 3.87715                                                                             | 4.16036                                                                             |
| Predicted Endpoint (-log C) | 4.21035                                                                             | 3.6546                                                                              | 4.65915                                                                             |
| Distance                    | 0.636                                                                               | 0.722                                                                               | 0.736                                                                               |
| Reference                   | UPJ-26452                                                                           | NTP REPORT # 225                                                                    | EPA COVER SHEET 0192;891101;(1)                                                     |

## Model Applicability

Unknown features are fingerprint features in the query molecule, but not found or appearing too infrequently in the training set.

1. All properties and OPS components are within expected ranges.
2. Unknown ECFP\_6 feature: -1046436026: [\*]F
3. Unknown ECFP\_6 feature: 99947387: [\*]:c(:[\*])Cl
4. Unknown ECFP\_6 feature: 226796801: [\*]C(\*)[\*]F
5. Unknown ECFP\_6 feature: 1305253718: [\*]:c(:[\*])O[c(:[\*]):[\*]]
6. Unknown ECFP\_6 feature: -677309799: [\*]:c(:[\*]):n:[cH]:[\*]
7. Unknown ECFP\_6 feature: 1338334141: [\*]C(=[\*])NC
8. Unknown ECFP\_6 feature: -177077903: [\*]N[c(:[cH]:[\*]):[cH]:[\*]]
9. Unknown ECFP\_6 feature: 1336678434: [\*]:c(:[\*]):c(:[cH]:[\*])C(\*)[\*]F
10. Unknown ECFP\_6 feature: -649580166: [\*]NC(=O)N[\*]
11. Unknown ECFP\_6 feature: -1952889961: [\*]:c(:[\*])C(F)(F)F
12. Unknown ECFP\_6 feature: 1413420509: [\*]C(=[\*])[c(:[cH]:[\*]):n:[\*]]
13. Unknown ECFP\_6 feature: 1996163143: [\*]:[cH]:[cH]:n:[\*]
14. Unknown ECFP\_6 feature: 1430169877: [\*]NC(=O)[c(:[\*]):[\*]]
15. Unknown ECFP\_6 feature: 864287155: [\*]NC

## Feature Contribution

Top features for positive contribution

| Fingerprint                                   | Bit/Smiles | Feature Structure                                                                                                               | Score  |
|-----------------------------------------------|------------|---------------------------------------------------------------------------------------------------------------------------------|--------|
| ECFP_6                                        | -176455838 | 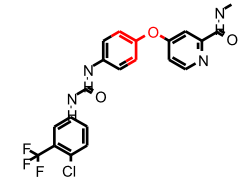<br><chem>[*]O[c](:[cH]:[*]):[cH]:[*]</chem> | 0.106  |
| FCFP_6                                        | 32         | <br><chem>[*]Cl</chem>                       | 0.101  |
| FCFP_6                                        | 3          | <br><chem>[*]N[*]</chem>                     | 0.0924 |
| <b>Top Features for negative contribution</b> |            |                                                                                                                                 |        |
| Fingerprint                                   | Bit/Smiles | Feature Structure                                                                                                               | Score  |
| FCFP_6                                        | 1          | <br><chem>[*]=O</chem>                     | -0.102 |

|               |                   |                                                                                                                                                             |                |
|---------------|-------------------|-------------------------------------------------------------------------------------------------------------------------------------------------------------|----------------|
| <p>ECFP_6</p> | <p>1236483485</p> | 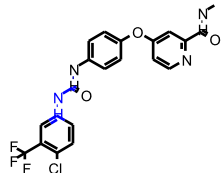 <p><chem>[*]C(=[*])N[c](:[*]);</chem><br/><chem>[*]</chem></p>          | <p>-0.0747</p> |
| <p>FCFP_6</p> | <p>203677720</p>  |  <p><chem>[*]C(=[*])[c](:[cH]:[</chem><br/><chem>*)]:[cH]:[*]</chem></p> | <p>-0.0713</p> |

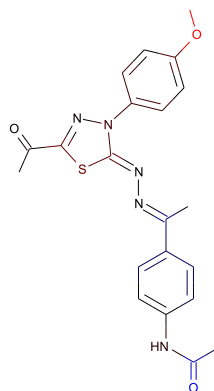

$C_{21}H_{21}N_5O_3S$

Molecular Weight: 423.48813

ALogP: 3.064

Rotatable Bonds: 6

Acceptors: 8

Donors: 1

### Model Prediction

Prediction: 0.0292

Unit: g/kg\_body\_weight

Mahalanobis Distance: 9.65

Mahalanobis Distance p-value: 0.000158

Mahalanobis Distance: The Mahalanobis distance (MD) is a generalization of the Euclidean distance that accounts for correlations among the X properties. It is calculated as the distance to the center of the training data. The larger the MD, the less trustworthy the prediction.

Mahalanobis Distance p-value: The p-value gives the fraction of training data with an MD greater than or equal to the one for the given sample, assuming normally distributed data. The smaller the p-value, the less trustworthy the prediction. For highly non-normal X properties (e.g., fingerprints), the MD p-value is wildly inaccurate.

### Structural Similar Compounds

| Name                        | COUMAPHOS     | AZINPHOSMETHYL | PARATHION      |
|-----------------------------|---------------|----------------|----------------|
| Structure                   |               |                |                |
| Actual Endpoint (-log C)    | 5.60537       | 4.65515        | 5.01172        |
| Predicted Endpoint (-log C) | 4.15004       | 4.22281        | 3.88389        |
| Distance                    | 0.643         | 0.665          | 0.677          |
| Reference                   | NCI/NTP TR-96 | NCI/NTP TR-69  | NCI/NTP TR-070 |

### Model Applicability

Unknown features are fingerprint features in the query molecule, but not found or appearing too infrequently in the training set.

- OPS PC9 out of range. Value: 3.7179. Training min, max, SD, explained variance: -2.8548, 3.3954, 1.263, 0.0360.

### Feature Contribution

#### Top features for positive contribution

| Fingerprint | Bit/Smiles | Feature Structure | Score |
|-------------|------------|-------------------|-------|
| FCFP_2      | 136627117  | <br>[*]OC         | 0.173 |

|                                               |                   |                                                                                                                                         |              |
|-----------------------------------------------|-------------------|-----------------------------------------------------------------------------------------------------------------------------------------|--------------|
| FCFP_2                                        | -1143715940       | 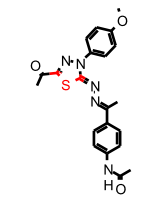<br><chem>[*]C1=[*][*]C(=[*])S1</chem>               | 0.095        |
| FCFP_2                                        | 1036089772        | <br><chem>[*]:[c](:[*])OC</chem>                     | 0.0749       |
| <b>Top Features for negative contribution</b> |                   |                                                                                                                                         |              |
| <b>Fingerprint</b>                            | <b>Bit/Smiles</b> | <b>Feature Structure</b>                                                                                                                | <b>Score</b> |
| FCFP_2                                        | 1872154524        | <br><chem>[*]C(=O)[*]</chem>                         | -0.105       |
| FCFP_2                                        | 203677720         | <br><chem>[*]C(=[*])[c](:[cH]:[*]):[cH]:[*]</chem> | -0.0829      |
| FCFP_2                                        | 1                 | <br><chem>[*]=O</chem>                             | -0.0796      |



18a

TOPKAT\_Rat\_Maximum\_Tolerated\_Dose\_Feed

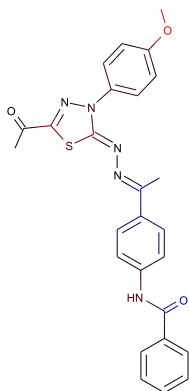C<sub>26</sub>H<sub>23</sub>N<sub>5</sub>O<sub>3</sub>S

Molecular Weight: 485.55751

ALogP: 4.728

Rotatable Bonds: 7

Acceptors: 8

Donors: 1

### Model Prediction

Prediction: 0.0279

Unit: g/kg\_body\_weight

Mahalanobis Distance: 8.69

Mahalanobis Distance p-value: 0.00372

Mahalanobis Distance: The Mahalanobis distance (MD) is a generalization of the Euclidean distance that accounts for correlations among the X properties. It is calculated as the distance to the center of the training data. The larger the MD, the less trustworthy the prediction.

Mahalanobis Distance p-value: The p-value gives the fraction of training data with an MD greater than or equal to the one for the given sample, assuming normally distributed data. The smaller the p-value, the less trustworthy the prediction. For highly non-normal X properties (e.g., fingerprints), the MD p-value is wildly inaccurate.

### Structural Similar Compounds

| Name                        | RESERPINE      | C.I.PIGMENT RED 23 | SALICYLAZOSULFAPYRIDINE |
|-----------------------------|----------------|--------------------|-------------------------|
| Structure                   |                |                    |                         |
| Actual Endpoint (-log C)    | 6.13118        | 2.30052            | 3.375                   |
| Predicted Endpoint (-log C) | 4.38304        | 3.55333            | 2.80292                 |
| Distance                    | 0.658          | 0.748              | 0.797                   |
| Reference                   | NCI/NTP TR-193 | NCI/NTP TR-411     | NCI/NTP TR-457          |

### Model Applicability

Unknown features are fingerprint features in the query molecule, but not found or appearing too infrequently in the training set.

1. All properties and OPS components are within expected ranges.

### Feature Contribution

#### Top features for positive contribution

| Fingerprint | Bit/Smiles | Feature Structure | Score |
|-------------|------------|-------------------|-------|
| FCFP_2      | 136627117  | <br>[*]OC         | 0.173 |

|                                               |                   |                                                                                                                                         |              |
|-----------------------------------------------|-------------------|-----------------------------------------------------------------------------------------------------------------------------------------|--------------|
| FCFP_2                                        | -1143715940       | <br><chem>[*]C1=[*][*]C(=[*])S1</chem>               | 0.095        |
| FCFP_2                                        | 1036089772        | <br><chem>[*]:[c](:[*])OC</chem>                     | 0.0749       |
| <b>Top Features for negative contribution</b> |                   |                                                                                                                                         |              |
| <b>Fingerprint</b>                            | <b>Bit/Smiles</b> | <b>Feature Structure</b>                                                                                                                | <b>Score</b> |
| FCFP_2                                        | 1872154524        | <br><chem>[*]C(=O)[*]</chem>                         | -0.105       |
| FCFP_2                                        | 203677720         | <br><chem>[*]C(=[*])[c](:[cH]:[*]):[cH]:[*]</chem> | -0.0829      |
| FCFP_2                                        | 1                 | <br><chem>[*]=O</chem>                             | -0.0796      |





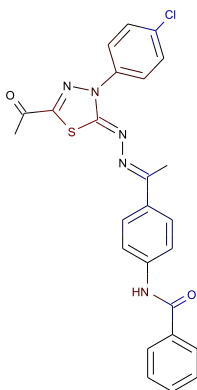

$C_{25}H_{20}ClN_5O_2S$

Molecular Weight: 489.97659

ALogP: 5.409

Rotatable Bonds: 6

Acceptors: 7

Donors: 1

### Model Prediction

Prediction: 0.0624

Unit: g/kg\_body\_weight

Mahalanobis Distance: 9.31

Mahalanobis Distance p-value: 0.000508

Mahalanobis Distance: The Mahalanobis distance (MD) is a generalization of the Euclidean distance that accounts for correlations among the X properties. It is calculated as the distance to the center of the training data. The larger the MD, the less trustworthy the prediction.

Mahalanobis Distance p-value: The p-value gives the fraction of training data with an MD greater than or equal to the one for the given sample, assuming normally distributed data. The smaller the p-value, the less trustworthy the prediction. For highly non-normal X properties (e.g., fingerprints), the MD p-value is wildly inaccurate.

### Structural Similar Compounds

| Name                        | C.I.PIGMENT RED 3 | RESERPINE      | ROTENONE       |
|-----------------------------|-------------------|----------------|----------------|
| Structure                   |                   |                |                |
| Actual Endpoint (-log C)    | 2.65635           | 6.13118        | 5.06769        |
| Predicted Endpoint (-log C) | 2.97957           | 4.38304        | 4.11907        |
| Distance                    | 0.773             | 0.780          | 0.815          |
| Reference                   | NCI/NTP TR-407    | NCI/NTP TR-193 | NCI/NTP TR-320 |

### Model Applicability

Unknown features are fingerprint features in the query molecule, but not found or appearing too infrequently in the training set.

- OPS PC5 out of range. Value: 5.2711. Training min, max, SD, explained variance: -3.3892, 5.0834, 1.644, 0.0611.

### Feature Contribution

#### Top features for positive contribution

| Fingerprint | Bit/Smiles  | Feature Structure         | Score |
|-------------|-------------|---------------------------|-------|
| FCFP_2      | -1143715940 | <br>[*]C1=[*][*]C(=[*])S1 | 0.095 |

|                                               |                   |                                                                                                                                |              |
|-----------------------------------------------|-------------------|--------------------------------------------------------------------------------------------------------------------------------|--------------|
| FCFP_2                                        | 3                 | 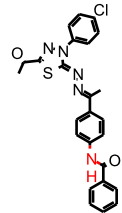<br>[*]N[*]                                 | 0.0737       |
| FCFP_2                                        | 332760439         | <br>[*]N([*])[c](:[cH]:[*]<br>):[cH]:[*]    | 0.0611       |
| <b>Top Features for negative contribution</b> |                   |                                                                                                                                |              |
| <b>Fingerprint</b>                            | <b>Bit/Smiles</b> | <b>Feature Structure</b>                                                                                                       | <b>Score</b> |
| FCFP_2                                        | 71476542          | <br>[*]:[c](:[*])Cl                         | -0.134       |
| FCFP_2                                        | 1872154524        | <br>[*]C(=O)[*]                           | -0.105       |
| FCFP_2                                        | 203677720         | <br>[*]C(=[*])[c](:[cH]:[*]<br>):[cH]:[*] | -0.0829      |



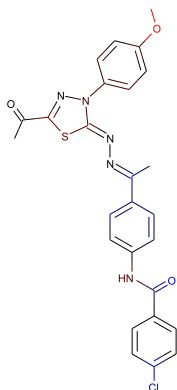
 $C_{26}H_{22}ClN_5O_3S$ 

Molecular Weight: 520.00258

ALogP: 5.392

Rotatable Bonds: 7

Acceptors: 8

Donors: 1

### Model Prediction

Prediction: 0.0336

Unit: g/kg\_body\_weight

Mahalanobis Distance: 9.12

Mahalanobis Distance p-value: 0.000974

Mahalanobis Distance: The Mahalanobis distance (MD) is a generalization of the Euclidean distance that accounts for correlations among the X properties. It is calculated as the distance to the center of the training data. The larger the MD, the less trustworthy the prediction.

Mahalanobis Distance p-value: The p-value gives the fraction of training data with an MD greater than or equal to the one for the given sample, assuming normally distributed data. The smaller the p-value, the less trustworthy the prediction. For highly non-normal X properties (e.g., fingerprints), the MD p-value is wildly inaccurate.

### Structural Similar Compounds

| Name                        | RESERPINE      | C.I.PIGMENT RED 23 | SALICYLAZOSULFAPYRIDINE |
|-----------------------------|----------------|--------------------|-------------------------|
| Structure                   |                |                    |                         |
| Actual Endpoint (-log C)    | 6.13118        | 2.30052            | 3.375                   |
| Predicted Endpoint (-log C) | 4.38304        | 3.55333            | 2.80292                 |
| Distance                    | 0.651          | 0.771              | 0.849                   |
| Reference                   | NCI/NTP TR-193 | NCI/NTP TR-411     | NCI/NTP TR-457          |

### Model Applicability

Unknown features are fingerprint features in the query molecule, but not found or appearing too infrequently in the training set.

- OPS PC5 out of range. Value: 5.2806. Training min, max, SD, explained variance: -3.3892, 5.0834, 1.644, 0.0611.

### Feature Contribution

#### Top features for positive contribution

| Fingerprint | Bit/Smiles | Feature Structure | Score |
|-------------|------------|-------------------|-------|
| FCFP_2      | 136627117  | <br>[*]OC         | 0.173 |

|                                               |                   |                                                                                                                                        |              |
|-----------------------------------------------|-------------------|----------------------------------------------------------------------------------------------------------------------------------------|--------------|
| FCFP_2                                        | -1143715940       | 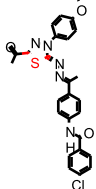<br><chem>[*]C1=[*][*]C(=[*])S1</chem>              | 0.095        |
| FCFP_2                                        | 1036089772        | <br><chem>[*]:[c](:[*])OC</chem>                    | 0.0749       |
| <b>Top Features for negative contribution</b> |                   |                                                                                                                                        |              |
| <b>Fingerprint</b>                            | <b>Bit/Smiles</b> | <b>Feature Structure</b>                                                                                                               | <b>Score</b> |
| FCFP_2                                        | 71476542          | <br><chem>[*]:[c](:[*])Cl</chem>                    | -0.134       |
| FCFP_2                                        | 1872154524        | <br><chem>[*]C(=O)[*]</chem>                      | -0.105       |
| FCFP_2                                        | 203677720         | <br><chem>[*]C(=[*])[c](:[cH][*]):[cH]:[*]</chem> | -0.0829      |



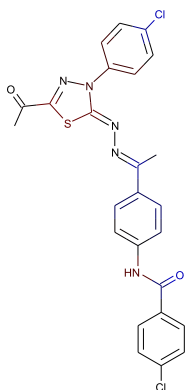

$C_{25}H_{19}Cl_2N_5O_2S$

Molecular Weight: 524.42166

ALogP: 6.073

Rotatable Bonds: 6

Acceptors: 7

Donors: 1

### Model Prediction

Prediction: 0.0498

Unit: g/kg\_body\_weight

Mahalanobis Distance: 9.27

Mahalanobis Distance p-value: 0.000596

Mahalanobis Distance: The Mahalanobis distance (MD) is a generalization of the Euclidean distance that accounts for correlations among the X properties. It is calculated as the distance to the center of the training data. The larger the MD, the less trustworthy the prediction.

Mahalanobis Distance p-value: The p-value gives the fraction of training data with an MD greater than or equal to the one for the given sample, assuming normally distributed data. The smaller the p-value, the less trustworthy the prediction. For highly non-normal X properties (e.g., fingerprints), the MD p-value is wildly inaccurate.

### Structural Similar Compounds

| Name                        | RESERPINE      | C.I.PIGMENT RED 3 | ROTENONE       |
|-----------------------------|----------------|-------------------|----------------|
| Structure                   |                |                   |                |
| Actual Endpoint (-log C)    | 6.13118        | 2.65635           | 5.06769        |
| Predicted Endpoint (-log C) | 4.38304        | 2.97957           | 4.11907        |
| Distance                    | 0.776          | 0.825             | 0.857          |
| Reference                   | NCI/NTP TR-193 | NCI/NTP TR-407    | NCI/NTP TR-320 |

### Model Applicability

Unknown features are fingerprint features in the query molecule, but not found or appearing too infrequently in the training set.

- OPS PC5 out of range. Value: 5.3889. Training min, max, SD, explained variance: -3.3892, 5.0834, 1.644, 0.0611.

### Feature Contribution

#### Top features for positive contribution

| Fingerprint | Bit/Smiles  | Feature Structure         | Score |
|-------------|-------------|---------------------------|-------|
| FCFP_2      | -1143715940 | <br>[*]C1=[*][*]C(=[*])S1 | 0.095 |



|                                               |                   |                                                                                                                                               |              |
|-----------------------------------------------|-------------------|-----------------------------------------------------------------------------------------------------------------------------------------------|--------------|
| FCFP_2                                        | 3                 | 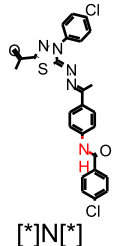<br><chem>[*]N[*]</chem>                                   | 0.0737       |
| FCFP_2                                        | 332760439         | <br><chem>[*]N([*])[c](:[cH]:[*]<br/>):[cH]:[*]</chem>     | 0.0611       |
| <b>Top Features for negative contribution</b> |                   |                                                                                                                                               |              |
| <b>Fingerprint</b>                            | <b>Bit/Smiles</b> | <b>Feature Structure</b>                                                                                                                      | <b>Score</b> |
| FCFP_2                                        | 71476542          | <br><chem>[*]:[c](:[*])Cl</chem>                           | -0.134       |
| FCFP_2                                        | 1872154524        | <br><chem>[*]C(=O)[*]</chem>                             | -0.105       |
| FCFP_2                                        | 203677720         | <br><chem>[*]C(=[*])[c](:[cH]:[*]<br/>*):[cH]:[*]</chem> | -0.0829      |



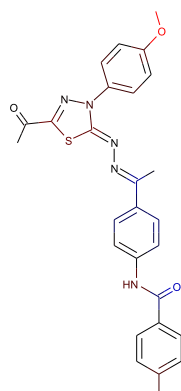

$C_{27}H_{25}N_5O_3S$

Molecular Weight: 499.58409

ALogP: 5.214

Rotatable Bonds: 7

Acceptors: 8

Donors: 1

### Model Prediction

Prediction: 0.0228

Unit: g/kg\_body\_weight

Mahalanobis Distance: 9.35

Mahalanobis Distance p-value: 0.000442

Mahalanobis Distance: The Mahalanobis distance (MD) is a generalization of the Euclidean distance that accounts for correlations among the X properties. It is calculated as the distance to the center of the training data. The larger the MD, the less trustworthy the prediction.

Mahalanobis Distance p-value: The p-value gives the fraction of training data with an MD greater than or equal to the one for the given sample, assuming normally distributed data. The smaller the p-value, the less trustworthy the prediction. For highly non-normal X properties (e.g., fingerprints), the MD p-value is wildly inaccurate.

### Structural Similar Compounds

| Name                        | RESERPINE      | C.I.PIGMENT RED 23 | SALICYLAZOSULFAPYRIDINE |
|-----------------------------|----------------|--------------------|-------------------------|
| Structure                   |                |                    |                         |
| Actual Endpoint (-log C)    | 6.13118        | 2.30052            | 3.375                   |
| Predicted Endpoint (-log C) | 4.38304        | 3.55333            | 2.80292                 |
| Distance                    | 0.657          | 0.754              | 0.822                   |
| Reference                   | NCI/NTP TR-193 | NCI/NTP TR-411     | NCI/NTP TR-457          |

### Model Applicability

Unknown features are fingerprint features in the query molecule, but not found or appearing too infrequently in the training set.

1. All properties and OPS components are within expected ranges.

### Feature Contribution

#### Top features for positive contribution

| Fingerprint | Bit/Smiles | Feature Structure | Score |
|-------------|------------|-------------------|-------|
| FCFP_2      | 136627117  | <br>[*]OC         | 0.173 |

|                                               |                   |                                                                                                                                         |              |
|-----------------------------------------------|-------------------|-----------------------------------------------------------------------------------------------------------------------------------------|--------------|
| FCFP_2                                        | -1143715940       | 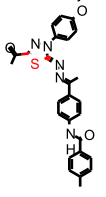<br><chem>[*]C1=[*][*]C(=[*])S1</chem>               | 0.095        |
| FCFP_2                                        | 1036089772        | <br><chem>[*]:[c](:[*])OC</chem>                     | 0.0749       |
| <b>Top Features for negative contribution</b> |                   |                                                                                                                                         |              |
| <b>Fingerprint</b>                            | <b>Bit/Smiles</b> | <b>Feature Structure</b>                                                                                                                | <b>Score</b> |
| FCFP_2                                        | 1872154524        | <br><chem>[*]C(=O)[*]</chem>                         | -0.105       |
| FCFP_2                                        | 203677720         | <br><chem>[*]C(=[*])[c](:[cH]:[*]):[cH]:[*]</chem> | -0.0829      |
| FCFP_2                                        | 1                 | <br><chem>[*]=O</chem>                             | -0.0796      |



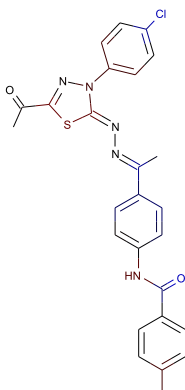

$C_{26}H_{22}ClN_5O_2S$

Molecular Weight: 504.00318

ALogP: 5.895

Rotatable Bonds: 6

Acceptors: 7

Donors: 1

### Model Prediction

Prediction: 0.0511

Unit: g/kg\_body\_weight

Mahalanobis Distance: 9.87

Mahalanobis Distance p-value: 7.21e-005

Mahalanobis Distance: The Mahalanobis distance (MD) is a generalization of the Euclidean distance that accounts for correlations among the X properties. It is calculated as the distance to the center of the training data. The larger the MD, the less trustworthy the prediction.

Mahalanobis Distance p-value: The p-value gives the fraction of training data with an MD greater than or equal to the one for the given sample, assuming normally distributed data. The smaller the p-value, the less trustworthy the prediction. For highly non-normal X properties (e.g., fingerprints), the MD p-value is wildly inaccurate.

### Structural Similar Compounds

| Name                        | C.I.PIGMENT RED 3 | RESERPINE      | ROTENONE       |
|-----------------------------|-------------------|----------------|----------------|
| Structure                   |                   |                |                |
| Actual Endpoint (-log C)    | 2.65635           | 6.13118        | 5.06769        |
| Predicted Endpoint (-log C) | 2.97957           | 4.38304        | 4.11907        |
| Distance                    | 0.778             | 0.786          | 0.842          |
| Reference                   | NCI/NTP TR-407    | NCI/NTP TR-193 | NCI/NTP TR-320 |

### Model Applicability

Unknown features are fingerprint features in the query molecule, but not found or appearing too infrequently in the training set.

1. All properties and OPS components are within expected ranges.

### Feature Contribution

#### Top features for positive contribution

| Fingerprint | Bit/Smiles  | Feature Structure                      | Score |
|-------------|-------------|----------------------------------------|-------|
| FCFP_2      | -1143715940 | <br><chem>[*]C1=[*][*]C(=[*])S1</chem> | 0.095 |

|                                               |                   |                                                                                                                            |              |
|-----------------------------------------------|-------------------|----------------------------------------------------------------------------------------------------------------------------|--------------|
| FCFP_2                                        | 3                 | 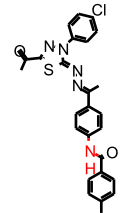<br>[*]N[*]                             | 0.0737       |
| FCFP_2                                        | 136120670         | <br>[*]:[c](:[*])C                      | 0.064        |
| <b>Top Features for negative contribution</b> |                   |                                                                                                                            |              |
| <b>Fingerprint</b>                            | <b>Bit/Smiles</b> | <b>Feature Structure</b>                                                                                                   | <b>Score</b> |
| FCFP_2                                        | 71476542          | <br>[*]:[c](:[*])Cl                     | -0.134       |
| FCFP_2                                        | 1872154524        | <br>[*]C(=O)[*]                       | -0.105       |
| FCFP_2                                        | 203677720         | <br>[*]C(=[*])[c](:[cH]:[*]):[cH]:[*] | -0.0829      |





# Sorafenib

# TOPKAT\_Rat\_Maximum\_Tolerated\_Dose\_Feed

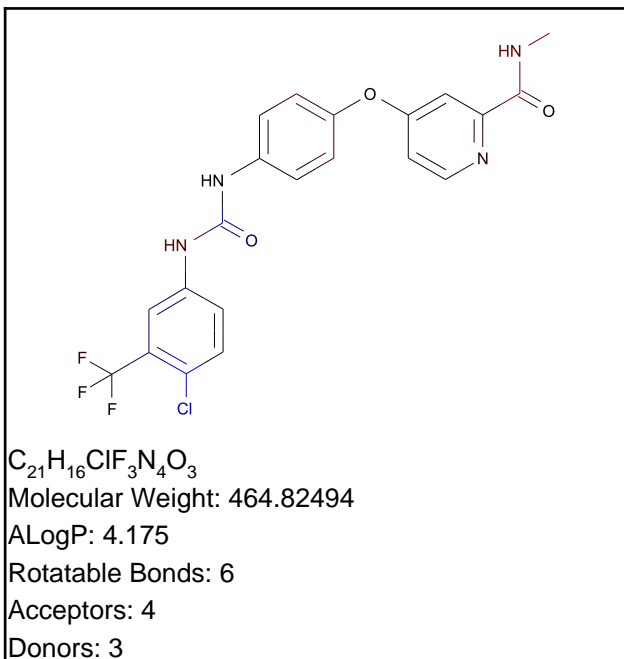

## Model Prediction

Prediction: 0.0885

Unit: g/kg\_body\_weight

Mahalanobis Distance: 12.4

Mahalanobis Distance p-value: 1.76e-009

Mahalanobis Distance: The Mahalanobis distance (MD) is a generalization of the Euclidean distance that accounts for correlations among the X properties. It is calculated as the distance to the center of the training data. The larger the MD, the less trustworthy the prediction.

Mahalanobis Distance p-value: The p-value gives the fraction of training data with an MD greater than or equal to the one for the given sample, assuming normally distributed data. The smaller the p-value, the less trustworthy the prediction. For highly non-normal X properties (e.g., fingerprints), the MD p-value is wildly inaccurate.

## Structural Similar Compounds

| Name                        | FUROSEMIDE                                                                          | PHENOLPHTHALEIN                                                                     | DISPERSE YELLOW 3                                                                   |
|-----------------------------|-------------------------------------------------------------------------------------|-------------------------------------------------------------------------------------|-------------------------------------------------------------------------------------|
| Structure                   | 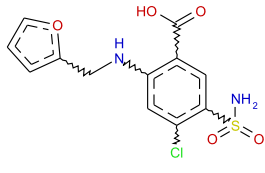 |  |  |
| Actual Endpoint (-log C)    | 4.04236                                                                             | 2.20184                                                                             | 2.77703                                                                             |
| Predicted Endpoint (-log C) | 2.8614                                                                              | 2.8857                                                                              | 2.80195                                                                             |
| Distance                    | 0.741                                                                               | 0.780                                                                               | 0.799                                                                               |
| Reference                   | NCI/NTP TR-356                                                                      | NCI/NTP TR-465                                                                      | NCI/NTP TR-222                                                                      |

## Model Applicability

Unknown features are fingerprint features in the query molecule, but not found or appearing too infrequently in the training set.

1. All properties and OPS components are within expected ranges.

## Feature Contribution

### Top features for positive contribution

| Fingerprint | Bit/Smiles | Feature Structure                                                                                                  | Score |
|-------------|------------|--------------------------------------------------------------------------------------------------------------------|-------|
| FCFP_2      | -885550502 | 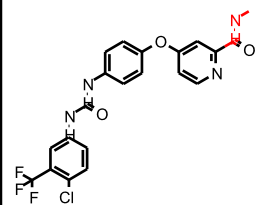<br><chem>[*]C(=[*])NC</chem> | 0.115 |

|                                               |                   |                                                                                                                                         |              |
|-----------------------------------------------|-------------------|-----------------------------------------------------------------------------------------------------------------------------------------|--------------|
| FCFP_2                                        | 3                 | 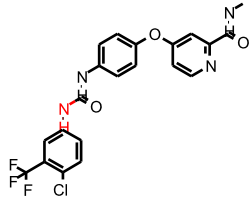<br><chem>[*]N[*]</chem>                             | 0.0737       |
| FCFP_2                                        | 332760439         | <br><chem>[*]N([*])[c](:[cH]:[*]):[cH]:[*]</chem>    | 0.0611       |
| <b>Top Features for negative contribution</b> |                   |                                                                                                                                         |              |
| <b>Fingerprint</b>                            | <b>Bit/Smiles</b> | <b>Feature Structure</b>                                                                                                                | <b>Score</b> |
| FCFP_2                                        | 71476542          | <br><chem>[*]:[c](:[*])Cl</chem>                     | -0.134       |
| FCFP_2                                        | 1872154524        | <br><chem>[*]C(=O)[*]</chem>                       | -0.105       |
| FCFP_2                                        | 203677720         | <br><chem>[*]C(=[*])[c](:[cH]:[*]):[cH]:[*]</chem> | -0.0829      |



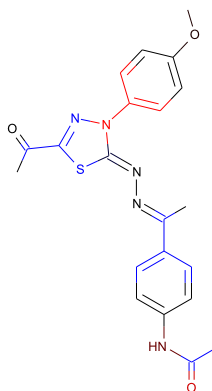

$C_{21}H_{21}N_5O_3S$

Molecular Weight: 423.48813

ALogP: 3.064

Rotatable Bonds: 6

Acceptors: 8

Donors: 1

### Model Prediction

Prediction: 0.000796

Unit: g/kg\_body\_weight

Mahalanobis Distance: 10.5

Mahalanobis Distance p-value: 1.14e-006

Mahalanobis Distance: The Mahalanobis distance (MD) is a generalization of the Euclidean distance that accounts for correlations among the X properties. It is calculated as the distance to the center of the training data. The larger the MD, the less trustworthy the prediction.

Mahalanobis Distance p-value: The p-value gives the fraction of training data with an MD greater than or equal to the one for the given sample, assuming normally distributed data. The smaller the p-value, the less trustworthy the prediction. For highly non-normal X properties (e.g., fingerprints), the MD p-value is wildly inaccurate.

### Structural Similar Compounds

| Name                        | PENICILLIN VK  | OCHRATOXIN     | PROBENECID     |
|-----------------------------|----------------|----------------|----------------|
| Structure                   |                |                |                |
| Actual Endpoint (-log C)    | 2.54455        | 6.28396        | 2.85333        |
| Predicted Endpoint (-log C) | 3.9702         | 5.12358        | 2.4258         |
| Distance                    | 0.809          | 0.882          | 1.004          |
| Reference                   | NCI/NTP TR-336 | NCI/NTP TR-358 | NCI/NTP TR-395 |

### Model Applicability

Unknown features are fingerprint features in the query molecule, but not found or appearing too infrequently in the training set.

1. Num\_H\_Acceptors out of range. Value: 8. Training min, max, mean, SD: 0, 6, 1.6146, 1.644.
2. OPS\_PC6 out of range. Value: -2.6649. Training min, max, SD, explained variance: -2.4321, 2.9885, 1.256, 0.0488.
3. Unknown FCFP\_2 feature: -1549192822: [\*]N=C(/C)\[c](:[\*]):[\*]
4. Unknown FCFP\_2 feature: 580960234: [\*]C(=NN=[\*])[\*]
5. Unknown FCFP\_2 feature: -1986158408: [\*]N=C\1/S[\*]=[\*]N1[\*]

### Feature Contribution

#### Top features for positive contribution

| Fingerprint | Bit/Smiles | Feature Structure                        | Score |
|-------------|------------|------------------------------------------|-------|
| FCFP_2      | 332760439  | <br>[*]N([*])[c](:[cH]:[*]<br>):[cH]:[*] | 0.672 |

|                                               |                   |                                                                                                                            |              |
|-----------------------------------------------|-------------------|----------------------------------------------------------------------------------------------------------------------------|--------------|
| FCFP_2                                        | 1                 | 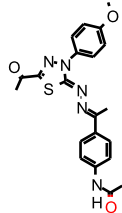<br>[*]=O                               | 0.511        |
| FCFP_2                                        | 3                 | <br>[*]N[*]                             | 0.104        |
| <b>Top Features for negative contribution</b> |                   |                                                                                                                            |              |
| <b>Fingerprint</b>                            | <b>Bit/Smiles</b> | <b>Feature Structure</b>                                                                                                   | <b>Score</b> |
| FCFP_2                                        | 136597326         | <br>[*]C(=[*])C                         | -0.489       |
| FCFP_2                                        | 203677720         | <br>[*]C(=[*])[c](:[cH]:[*]):[cH]:[*] | -0.406       |
| FCFP_2                                        | 565998553         | <br>[*]C(=[*])C1=N[*][*]S1            | -0.348       |



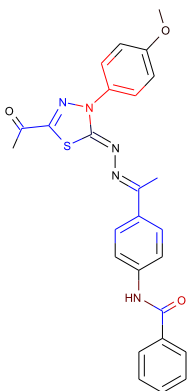

$C_{26}H_{23}N_5O_3S$

Molecular Weight: 485.55751

ALogP: 4.728

Rotatable Bonds: 7

Acceptors: 8

Donors: 1

### Model Prediction

Prediction: 0.000425

Unit: g/kg\_body\_weight

Mahalanobis Distance: 12.1

Mahalanobis Distance p-value: 6.28e-009

Mahalanobis Distance: The Mahalanobis distance (MD) is a generalization of the Euclidean distance that accounts for correlations among the X properties. It is calculated as the distance to the center of the training data. The larger the MD, the less trustworthy the prediction.

Mahalanobis Distance p-value: The p-value gives the fraction of training data with an MD greater than or equal to the one for the given sample, assuming normally distributed data. The smaller the p-value, the less trustworthy the prediction. For highly non-normal X properties (e.g., fingerprints), the MD p-value is wildly inaccurate.

### Structural Similar Compounds

| Name                        | OCHRATOXIN     | PENICILLIN VK  | SULFISOOXAZOLE |
|-----------------------------|----------------|----------------|----------------|
| Structure                   |                |                |                |
| Actual Endpoint (-log C)    | 6.28396        | 2.54455        | 2.82494        |
| Predicted Endpoint (-log C) | 5.12358        | 3.9702         | 3.0705         |
| Distance                    | 0.977          | 1.125          | 1.214          |
| Reference                   | NCI/NTP TR-358 | NCI/NTP TR-336 | NCI/NTP TR-138 |

### Model Applicability

Unknown features are fingerprint features in the query molecule, but not found or appearing too infrequently in the training set.

1. Molecular\_Weight out of range. Value: 485.56. Training min, max, mean, SD: 68.074, 434.63, 171.13, 85.06.
2. Num\_H\_Acceptors out of range. Value: 8. Training min, max, mean, SD: 0, 6, 1.6146, 1.644.
3. Num\_AromaticRings out of range. Value: 3. Training min, max, mean, SD: 0, 2, 0.5625, 0.693.
4. OPS\_PC6 out of range. Value: -3.1548. Training min, max, SD, explained variance: -2.4321, 2.9885, 1.256, 0.0488.
5. Unknown FCFP\_2 feature: -1549192822: [\*]\N=C(/C)\[c](:[\*]):[\*]
6. Unknown FCFP\_2 feature: 580960234: [\*]C(=NN=[\*])[\*]
7. Unknown FCFP\_2 feature: -1986158408: [\*]\N=C\1/S[\*]=[\*]N1[\*]

### Feature Contribution

#### Top features for positive contribution

| Fingerprint | Bit/Smiles | Feature Structure | Score |
|-------------|------------|-------------------|-------|
|             |            |                   |       |

|                                               |                   |                                                                                                                                         |              |
|-----------------------------------------------|-------------------|-----------------------------------------------------------------------------------------------------------------------------------------|--------------|
| FCFP_2                                        | 332760439         | 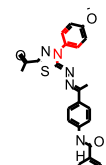<br><chem>[*]N([*])[c](:[cH]:[*]):[cH]:[*]</chem>    | 0.672        |
| FCFP_2                                        | 1                 | <br><chem>[*]=O</chem>                               | 0.511        |
| FCFP_2                                        | 3                 | <br><chem>[*]N[*]</chem>                             | 0.104        |
| <b>Top Features for negative contribution</b> |                   |                                                                                                                                         |              |
| <b>Fingerprint</b>                            | <b>Bit/Smiles</b> | <b>Feature Structure</b>                                                                                                                | <b>Score</b> |
| FCFP_2                                        | 136597326         | <br><chem>[*]C(=[*])C</chem>                       | -0.489       |
| FCFP_2                                        | 203677720         | <br><chem>[*]C(=[*])[c](:[cH]:[*]):[cH]:[*]</chem> | -0.406       |



|        |           |                                                                                                                                                                                                                                                                                                                                             |        |
|--------|-----------|---------------------------------------------------------------------------------------------------------------------------------------------------------------------------------------------------------------------------------------------------------------------------------------------------------------------------------------------|--------|
| FCFP_2 | 565998553 | 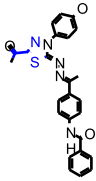 <p>The chemical structure shows a thioamide group (S-C(=N)-N) attached to a benzene ring. The nitrogen atom is colored blue. The benzene ring is substituted with a trifluoromethyl group (-CF<sub>3</sub>) and a methoxy group (-OCH<sub>3</sub>).</p> | -0.348 |
|--------|-----------|---------------------------------------------------------------------------------------------------------------------------------------------------------------------------------------------------------------------------------------------------------------------------------------------------------------------------------------------|--------|

[\*]C(=\*)C1=N[\*]S  
1

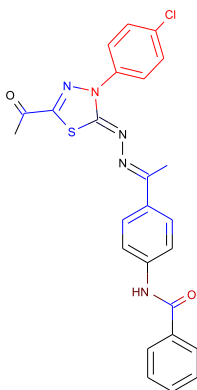

$C_{25}H_{20}ClN_5O_2S$

Molecular Weight: 489.97659

ALogP: 5.409

Rotatable Bonds: 6

Acceptors: 7

Donors: 1

### Model Prediction

Prediction: 9.28e-005

Unit: g/kg\_body\_weight

Mahalanobis Distance: 9.54

Mahalanobis Distance p-value: 2.35e-005

Mahalanobis Distance: The Mahalanobis distance (MD) is a generalization of the Euclidean distance that accounts for correlations among the X properties. It is calculated as the distance to the center of the training data. The larger the MD, the less trustworthy the prediction.

Mahalanobis Distance p-value: The p-value gives the fraction of training data with an MD greater than or equal to the one for the given sample, assuming normally distributed data. The smaller the p-value, the less trustworthy the prediction. For highly non-normal X properties (e.g., fingerprints), the MD p-value is wildly inaccurate.

### Structural Similar Compounds

| Name                        | OCHRATOXIN     | PENICILLIN VK  | SULFISOOXAZOLE |
|-----------------------------|----------------|----------------|----------------|
| Structure                   |                |                |                |
| Actual Endpoint (-log C)    | 6.28396        | 2.54455        | 2.82494        |
| Predicted Endpoint (-log C) | 5.12358        | 3.9702         | 3.0705         |
| Distance                    | 0.912          | 1.169          | 1.199          |
| Reference                   | NCI/NTP TR-358 | NCI/NTP TR-336 | NCI/NTP TR-138 |

### Model Applicability

Unknown features are fingerprint features in the query molecule, but not found or appearing too infrequently in the training set.

1. Molecular\_Weight out of range. Value: 489.98. Training min, max, mean, SD: 68.074, 434.63, 171.13, 85.06.
2. Num\_H\_Acceptors out of range. Value: 7. Training min, max, mean, SD: 0, 6, 1.6146, 1.644.
3. Num\_AromaticRings out of range. Value: 3. Training min, max, mean, SD: 0, 2, 0.5625, 0.693.
4. OPS PC5 out of range. Value: -3.4295. Training min, max, SD, explained variance: -3.4, 4.1587, 1.489, 0.0686.
5. OPS PC10 out of range. Value: 2.8007. Training min, max, SD, explained variance: -3.9696, 2.3971, 0.982, 0.0298.
6. Unknown FCFP\_2 feature: -1549192822: [\*]N=C(/C)\[c](:[\*]):[\*]
7. Unknown FCFP\_2 feature: 580960234: [\*]C(=NN=[\*])[\*]
8. Unknown FCFP\_2 feature: -1986158408: [\*]N=C\1/S[\*]=[\*]N1[\*]

### Feature Contribution

#### Top features for positive contribution

| Fingerprint | Bit/Smiles | Feature Structure | Score |
|-------------|------------|-------------------|-------|
|             |            |                   |       |

|                                               |                   |                                                                                                                                         |              |
|-----------------------------------------------|-------------------|-----------------------------------------------------------------------------------------------------------------------------------------|--------------|
| FCFP_2                                        | 332760439         | 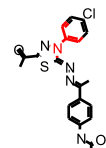<br><chem>[*]N([*])[c](:[cH]:[*]):[cH]:[*]</chem>    | 0.672        |
| FCFP_2                                        | 32                | <br><chem>[*]Cl</chem>                               | 0.526        |
| FCFP_2                                        | 1                 | <br><chem>[*]=O</chem>                               | 0.511        |
| <b>Top Features for negative contribution</b> |                   |                                                                                                                                         |              |
| <b>Fingerprint</b>                            | <b>Bit/Smiles</b> | <b>Feature Structure</b>                                                                                                                | <b>Score</b> |
| FCFP_2                                        | 136597326         | <br><chem>[*]C(=[*])C</chem>                        | -0.489       |
| FCFP_2                                        | 203677720         | <br><chem>[*]C(=[*])[c](:[cH]:[*]):[cH]:[*]</chem> | -0.406       |

|        |           |                                                                                                                                                                                                                                                                                                                                                                                                                           |        |
|--------|-----------|---------------------------------------------------------------------------------------------------------------------------------------------------------------------------------------------------------------------------------------------------------------------------------------------------------------------------------------------------------------------------------------------------------------------------|--------|
| FCFP_2 | 565998553 |  <p>The chemical structure shows a thioamide group (S=C-N) where the nitrogen is bonded to a 2-chlorophenyl ring. The sulfur atom is also bonded to a 2-(2,2,2-trifluoroethoxy)phenyl ring. The rings are oriented vertically, with the 2-chlorophenyl ring at the top and the 2-(2,2,2-trifluoroethoxy)phenyl ring at the bottom.</p> | -0.348 |
|--------|-----------|---------------------------------------------------------------------------------------------------------------------------------------------------------------------------------------------------------------------------------------------------------------------------------------------------------------------------------------------------------------------------------------------------------------------------|--------|

[\*]C(=[\*])C1=N[\*]][\*]S  
1

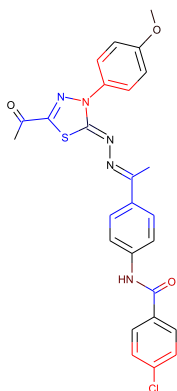

$C_{26}H_{22}ClN_5O_3S$

Molecular Weight: 520.00258

ALogP: 5.392

Rotatable Bonds: 7

Acceptors: 8

Donors: 1

### Model Prediction

Prediction: 3.39e-005

Unit: g/kg\_body\_weight

Mahalanobis Distance: 10.8

Mahalanobis Distance p-value: 3.91e-007

Mahalanobis Distance: The Mahalanobis distance (MD) is a generalization of the Euclidean distance that accounts for correlations among the X properties. It is calculated as the distance to the center of the training data. The larger the MD, the less trustworthy the prediction.

Mahalanobis Distance p-value: The p-value gives the fraction of training data with an MD greater than or equal to the one for the given sample, assuming normally distributed data. The smaller the p-value, the less trustworthy the prediction. For highly non-normal X properties (e.g., fingerprints), the MD p-value is wildly inaccurate.

### Structural Similar Compounds

| Name                        | OCHRATOXIN     | PENICILLIN VK  | SULFISOOXAZOLE |
|-----------------------------|----------------|----------------|----------------|
| Structure                   |                |                |                |
| Actual Endpoint (-log C)    | 6.28396        | 2.54455        | 2.82494        |
| Predicted Endpoint (-log C) | 5.12358        | 3.9702         | 3.0705         |
| Distance                    | 0.978          | 1.206          | 1.303          |
| Reference                   | NCI/NTP TR-358 | NCI/NTP TR-336 | NCI/NTP TR-138 |

### Model Applicability

Unknown features are fingerprint features in the query molecule, but not found or appearing too infrequently in the training set.

1. Molecular\_Weight out of range. Value: 520. Training min, max, mean, SD: 68.074, 434.63, 171.13, 85.06.
2. Num\_H\_Acceptors out of range. Value: 8. Training min, max, mean, SD: 0, 6, 1.6146, 1.644.
3. Num\_AromaticRings out of range. Value: 3. Training min, max, mean, SD: 0, 2, 0.5625, 0.693.
4. OPS PC5 out of range. Value: -4.6392. Training min, max, SD, explained variance: -3.4, 4.1587, 1.489, 0.0686.
5. Unknown FCFP\_2 feature: -1549192822: [\*]\N=C(/C)\[c](:[\*]):[\*]
6. Unknown FCFP\_2 feature: 580960234: [\*]C(=NN=[\*])[\*]
7. Unknown FCFP\_2 feature: -1986158408: [\*]\N=C\1/S[\*]=[\*]N1[\*]

### Feature Contribution

#### Top features for positive contribution

| Fingerprint | Bit/Smiles | Feature Structure | Score |
|-------------|------------|-------------------|-------|
|             |            |                   |       |

|                                               |                   |                                                                                                                                         |              |
|-----------------------------------------------|-------------------|-----------------------------------------------------------------------------------------------------------------------------------------|--------------|
| FCFP_2                                        | 332760439         | 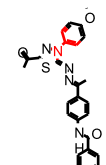<br><chem>[*]N([*])[c](:[cH]:[*]):[cH]:[*]</chem>    | 0.672        |
| FCFP_2                                        | 32                | <br><chem>[*]Cl</chem>                               | 0.526        |
| FCFP_2                                        | 1                 | <br><chem>[*]=O</chem>                               | 0.511        |
| <b>Top Features for negative contribution</b> |                   |                                                                                                                                         |              |
| <b>Fingerprint</b>                            | <b>Bit/Smiles</b> | <b>Feature Structure</b>                                                                                                                | <b>Score</b> |
| FCFP_2                                        | 136597326         | <br><chem>[*]C(=[*])C</chem>                       | -0.489       |
| FCFP_2                                        | 203677720         | <br><chem>[*]C(=[*])[c](:[cH]:[*]):[cH]:[*]</chem> | -0.406       |

|        |           |                                                                                                                                                                                                                                                                                                                        |        |
|--------|-----------|------------------------------------------------------------------------------------------------------------------------------------------------------------------------------------------------------------------------------------------------------------------------------------------------------------------------|--------|
| FCFP_2 | 565998553 | 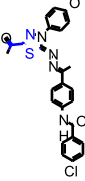 <p>The chemical structure shows a thioamide group (S=C-N) attached to a benzimidazole ring system. The benzimidazole ring is substituted with a chlorine atom and a methoxy group. The thioamide group is highlighted in blue.</p> | -0.348 |
|--------|-----------|------------------------------------------------------------------------------------------------------------------------------------------------------------------------------------------------------------------------------------------------------------------------------------------------------------------------|--------|

[\*]C(=\*)C1=N[\*]S  
1

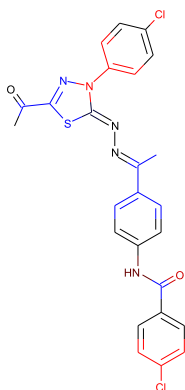

$C_{25}H_{19}Cl_2N_5O_2S$

Molecular Weight: 524.42166

ALogP: 6.073

Rotatable Bonds: 6

Acceptors: 7

Donors: 1

### Model Prediction

Prediction: 6.42e-005

Unit: g/kg\_body\_weight

Mahalanobis Distance: 9.8

Mahalanobis Distance p-value: 1.08e-005

Mahalanobis Distance: The Mahalanobis distance (MD) is a generalization of the Euclidean distance that accounts for correlations among the X properties. It is calculated as the distance to the center of the training data. The larger the MD, the less trustworthy the prediction.

Mahalanobis Distance p-value: The p-value gives the fraction of training data with an MD greater than or equal to the one for the given sample, assuming normally distributed data. The smaller the p-value, the less trustworthy the prediction. For highly non-normal X properties (e.g., fingerprints), the MD p-value is wildly inaccurate.

### Structural Similar Compounds

| Name                        | OCHRATOXIN     | PENICILLIN VK  | PHENYLBUTAZONE |
|-----------------------------|----------------|----------------|----------------|
| Structure                   |                |                |                |
| Actual Endpoint (-log C)    | 6.28396        | 2.54455        | 3.48909        |
| Predicted Endpoint (-log C) | 5.12358        | 3.9702         | 3.17333        |
| Distance                    | 0.966          | 1.241          | 1.250          |
| Reference                   | NCI/NTP TR-358 | NCI/NTP TR-336 | NCI/NTP TR-367 |

### Model Applicability

Unknown features are fingerprint features in the query molecule, but not found or appearing too infrequently in the training set.

1. Molecular\_Weight out of range. Value: 524.42. Training min, max, mean, SD: 68.074, 434.63, 171.13, 85.06.
2. Num\_H\_Acceptors out of range. Value: 7. Training min, max, mean, SD: 0, 6, 1.6146, 1.644.
3. Num\_AromaticRings out of range. Value: 3. Training min, max, mean, SD: 0, 2, 0.5625, 0.693.
4. OPS PC5 out of range. Value: -3.4476. Training min, max, SD, explained variance: -3.4, 4.1587, 1.489, 0.0686.
5. OPS PC10 out of range. Value: 2.6731. Training min, max, SD, explained variance: -3.9696, 2.3971, 0.982, 0.0298.
6. Unknown FCFP\_2 feature: -1549192822: [\*]N=C(/C)\[c](:[\*]):[\*]
7. Unknown FCFP\_2 feature: 580960234: [\*]C(=NN=[\*])[\*]
8. Unknown FCFP\_2 feature: -1986158408: [\*]N=C\1/S[\*]=[\*]N1[\*]

### Feature Contribution

#### Top features for positive contribution

| Fingerprint | Bit/Smiles | Feature Structure | Score |
|-------------|------------|-------------------|-------|
|             |            |                   |       |



|                                               |                   |                                                                                                                                |              |
|-----------------------------------------------|-------------------|--------------------------------------------------------------------------------------------------------------------------------|--------------|
| FCFP_2                                        | 332760439         | 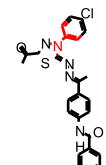<br><chem>[*]N([*])[c](:[cH]:[*])</chem>    | 0.672        |
| FCFP_2                                        | 32                | <br><chem>[*]Cl</chem>                      | 0.526        |
| FCFP_2                                        | 1                 | <br><chem>[*]=O</chem>                      | 0.511        |
| <b>Top Features for negative contribution</b> |                   |                                                                                                                                |              |
| <b>Fingerprint</b>                            | <b>Bit/Smiles</b> | <b>Feature Structure</b>                                                                                                       | <b>Score</b> |
| FCFP_2                                        | 136597326         | <br><chem>[*]C(=[*])C</chem>               | -0.489       |
| FCFP_2                                        | 203677720         | <br><chem>[*]C(=[*])[c](:[cH]:[*])</chem> | -0.406       |

|        |           |                                                                                                                                                                                                                                                                                                                                   |        |
|--------|-----------|-----------------------------------------------------------------------------------------------------------------------------------------------------------------------------------------------------------------------------------------------------------------------------------------------------------------------------------|--------|
| FCFP_2 | 565998553 | 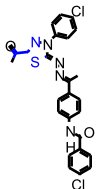 <p>The chemical structure shows a thioamide group (S=C=N) attached to a benzimidazole ring system. The benzimidazole ring is further substituted with a chlorine atom and a 2-chlorophenyl group. The sulfur atom is highlighted in blue.</p> | -0.348 |
|--------|-----------|-----------------------------------------------------------------------------------------------------------------------------------------------------------------------------------------------------------------------------------------------------------------------------------------------------------------------------------|--------|

[\*]C(=\*)C1=N[\*]S  
1

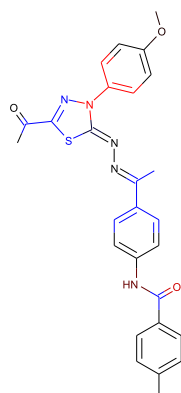

$C_{27}H_{25}N_5O_3S$

Molecular Weight: 499.58409

ALogP: 5.214

Rotatable Bonds: 7

Acceptors: 8

Donors: 1

### Model Prediction

Prediction: 0.000324

Unit: g/kg\_body\_weight

Mahalanobis Distance: 12.4

Mahalanobis Distance p-value: 2.5e-009

Mahalanobis Distance: The Mahalanobis distance (MD) is a generalization of the Euclidean distance that accounts for correlations among the X properties. It is calculated as the distance to the center of the training data. The larger the MD, the less trustworthy the prediction.

Mahalanobis Distance p-value: The p-value gives the fraction of training data with an MD greater than or equal to the one for the given sample, assuming normally distributed data. The smaller the p-value, the less trustworthy the prediction. For highly non-normal X properties (e.g., fingerprints), the MD p-value is wildly inaccurate.

### Structural Similar Compounds

| Name                        | OCHRATOXIN     | PENICILLIN VK  | SULFISOOXAZOLE |
|-----------------------------|----------------|----------------|----------------|
| Structure                   |                |                |                |
| Actual Endpoint (-log C)    | 6.28396        | 2.54455        | 2.82494        |
| Predicted Endpoint (-log C) | 5.12358        | 3.9702         | 3.0705         |
| Distance                    | 1.005          | 1.169          | 1.237          |
| Reference                   | NCI/NTP TR-358 | NCI/NTP TR-336 | NCI/NTP TR-138 |

### Model Applicability

Unknown features are fingerprint features in the query molecule, but not found or appearing too infrequently in the training set.

1. Molecular\_Weight out of range. Value: 499.58. Training min, max, mean, SD: 68.074, 434.63, 171.13, 85.06.
2. Num\_H\_Acceptors out of range. Value: 8. Training min, max, mean, SD: 0, 6, 1.6146, 1.644.
3. Num\_AromaticRings out of range. Value: 3. Training min, max, mean, SD: 0, 2, 0.5625, 0.693.
4. OPS\_PC6 out of range. Value: -3.2186. Training min, max, SD, explained variance: -2.4321, 2.9885, 1.256, 0.0488.
5. Unknown FCFP\_2 feature: -1549192822: [\*]\N=C(/C)\[c](:[\*]):[\*]
6. Unknown FCFP\_2 feature: 580960234: [\*]C(=NN=[\*])[\*]
7. Unknown FCFP\_2 feature: -1986158408: [\*]\N=C\1/S[\*]=[\*]N1[\*]

### Feature Contribution

#### Top features for positive contribution

| Fingerprint | Bit/Smiles | Feature Structure | Score |
|-------------|------------|-------------------|-------|
|             |            |                   |       |

|                                               |                   |                                                                                                                                         |              |
|-----------------------------------------------|-------------------|-----------------------------------------------------------------------------------------------------------------------------------------|--------------|
| FCFP_2                                        | 332760439         | 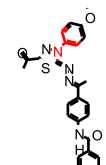<br><chem>[*]N([*])[c](:[cH]:[*]):[cH]:[*]</chem>    | 0.672        |
| FCFP_2                                        | 1                 | <br><chem>[*]=O</chem>                               | 0.511        |
| FCFP_2                                        | 3                 | <br><chem>[*]N[*]</chem>                             | 0.104        |
| <b>Top Features for negative contribution</b> |                   |                                                                                                                                         |              |
| <b>Fingerprint</b>                            | <b>Bit/Smiles</b> | <b>Feature Structure</b>                                                                                                                | <b>Score</b> |
| FCFP_2                                        | 136597326         | <br><chem>[*]C(=[*])C</chem>                       | -0.489       |
| FCFP_2                                        | 203677720         | <br><chem>[*]C(=[*])[c](:[cH]:[*]):[cH]:[*]</chem> | -0.406       |

|        |           |                                                                                                                                                                                                                                                                                                                                                                                                                                                                                                                                                                                                                                                                                                  |        |
|--------|-----------|--------------------------------------------------------------------------------------------------------------------------------------------------------------------------------------------------------------------------------------------------------------------------------------------------------------------------------------------------------------------------------------------------------------------------------------------------------------------------------------------------------------------------------------------------------------------------------------------------------------------------------------------------------------------------------------------------|--------|
| FCFP_2 | 565998553 | 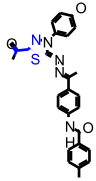 <p>The image shows a chemical structure of a thioamide derivative. It consists of a central carbon atom double-bonded to a sulfur atom (S) and single-bonded to a nitrogen atom (N). This nitrogen atom is further bonded to another nitrogen atom (N), which is in turn bonded to a phenyl ring (C6H5). The sulfur atom is also bonded to a nitrogen atom (N), which is bonded to a phenyl ring (C6H5). The sulfur atom is also bonded to a nitrogen atom (N), which is bonded to a phenyl ring (C6H5). The sulfur atom is also bonded to a nitrogen atom (N), which is bonded to a phenyl ring (C6H5).</p> | -0.348 |
|--------|-----------|--------------------------------------------------------------------------------------------------------------------------------------------------------------------------------------------------------------------------------------------------------------------------------------------------------------------------------------------------------------------------------------------------------------------------------------------------------------------------------------------------------------------------------------------------------------------------------------------------------------------------------------------------------------------------------------------------|--------|

[\*]C(=[\*])C1=N[\*]S  
1

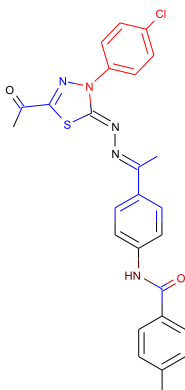

$C_{26}H_{22}ClN_5O_2S$

Molecular Weight: 504.00318

ALogP: 5.895

Rotatable Bonds: 6

Acceptors: 7

Donors: 1

### Model Prediction

Prediction: 7.05e-005

Unit: g/kg\_body\_weight

Mahalanobis Distance: 9.76

Mahalanobis Distance p-value: 1.21e-005

Mahalanobis Distance: The Mahalanobis distance (MD) is a generalization of the Euclidean distance that accounts for correlations among the X properties. It is calculated as the distance to the center of the training data. The larger the MD, the less trustworthy the prediction.

Mahalanobis Distance p-value: The p-value gives the fraction of training data with an MD greater than or equal to the one for the given sample, assuming normally distributed data. The smaller the p-value, the less trustworthy the prediction. For highly non-normal X properties (e.g., fingerprints), the MD p-value is wildly inaccurate.

### Structural Similar Compounds

| Name                        | OCHRATOXIN     | PENICILLIN VK  | SULFISOOXAZOLE |
|-----------------------------|----------------|----------------|----------------|
| Structure                   |                |                |                |
| Actual Endpoint (-log C)    | 6.28396        | 2.54455        | 2.82494        |
| Predicted Endpoint (-log C) | 5.12358        | 3.9702         | 3.0705         |
| Distance                    | 0.949          | 1.217          | 1.228          |
| Reference                   | NCI/NTP TR-358 | NCI/NTP TR-336 | NCI/NTP TR-138 |

### Model Applicability

Unknown features are fingerprint features in the query molecule, but not found or appearing too infrequently in the training set.

1. Molecular\_Weight out of range. Value: 504. Training min, max, mean, SD: 68.074, 434.63, 171.13, 85.06.
2. Num\_H\_Acceptors out of range. Value: 7. Training min, max, mean, SD: 0, 6, 1.6146, 1.644.
3. Num\_AromaticRings out of range. Value: 3. Training min, max, mean, SD: 0, 2, 0.5625, 0.693.
4. OPS PC5 out of range. Value: -3.4178. Training min, max, SD, explained variance: -3.4, 4.1587, 1.489, 0.0686.
5. OPS PC10 out of range. Value: 2.7196. Training min, max, SD, explained variance: -3.9696, 2.3971, 0.982, 0.0298.
6. Unknown FCFP\_2 feature: -1549192822: [\*]N=C(/C)\[c](:[\*]):[\*]
7. Unknown FCFP\_2 feature: 580960234: [\*]C(=NN=[\*])[\*]
8. Unknown FCFP\_2 feature: -1986158408: [\*]N=C\1/S[\*]=[\*]N1[\*]

### Feature Contribution

#### Top features for positive contribution

| Fingerprint | Bit/Smiles | Feature Structure | Score |
|-------------|------------|-------------------|-------|
|             |            |                   |       |

|                                               |                   |                                                                                                                                         |              |
|-----------------------------------------------|-------------------|-----------------------------------------------------------------------------------------------------------------------------------------|--------------|
| FCFP_2                                        | 332760439         | 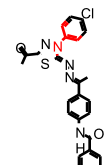<br><chem>[*]N([*])[c](:[cH]:[*]):[cH]:[*]</chem>    | 0.672        |
| FCFP_2                                        | 32                | <br><chem>[*]Cl</chem>                               | 0.526        |
| FCFP_2                                        | 1                 | <br><chem>[*]=O</chem>                               | 0.511        |
| <b>Top Features for negative contribution</b> |                   |                                                                                                                                         |              |
| <b>Fingerprint</b>                            | <b>Bit/Smiles</b> | <b>Feature Structure</b>                                                                                                                | <b>Score</b> |
| FCFP_2                                        | 136597326         | <br><chem>[*]C(=[*])C</chem>                        | -0.489       |
| FCFP_2                                        | 203677720         | <br><chem>[*]C(=[*])[c](:[cH]:[*]):[cH]:[*]</chem> | -0.406       |

|        |           |                                                                                                                                                                                                                                                                                                                   |        |
|--------|-----------|-------------------------------------------------------------------------------------------------------------------------------------------------------------------------------------------------------------------------------------------------------------------------------------------------------------------|--------|
| FCFP_2 | 565998553 | 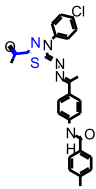 <p>The chemical structure shows a thioamide group (S-C(=N)-) attached to a benzimidazole ring system. The benzimidazole ring is further substituted with a chlorine atom and a trifluoromethoxy group (-OCF<sub>3</sub>).</p> | -0.348 |
|--------|-----------|-------------------------------------------------------------------------------------------------------------------------------------------------------------------------------------------------------------------------------------------------------------------------------------------------------------------|--------|

[\*]C(=\*)C1=N[\*]S  
1



# Sorafenib

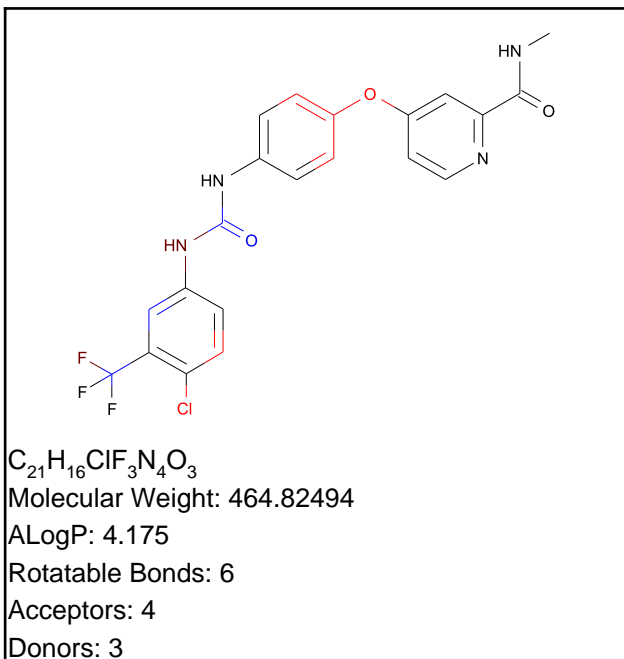

## Model Prediction

Prediction: 0.000918

Unit: g/kg\_body\_weight

Mahalanobis Distance: 12.2

Mahalanobis Distance p-value: 4.69e-009

Mahalanobis Distance: The Mahalanobis distance (MD) is a generalization of the Euclidean distance that accounts for correlations among the X properties. It is calculated as the distance to the center of the training data. The larger the MD, the less trustworthy the prediction.

Mahalanobis Distance p-value: The p-value gives the fraction of training data with an MD greater than or equal to the one for the given sample, assuming normally distributed data. The smaller the p-value, the less trustworthy the prediction. For highly non-normal X properties (e.g., fingerprints), the MD p-value is wildly inaccurate.

# TOPKAT\_Rat\_Maximum\_Tolerated\_Dose\_Gavage

## Structural Similar Compounds

| Name                        | OCHRATOXIN                                                                          | SULFISOOXAZOLE                                                                      | PENICILLIN VK                                                                       |
|-----------------------------|-------------------------------------------------------------------------------------|-------------------------------------------------------------------------------------|-------------------------------------------------------------------------------------|
| Structure                   | 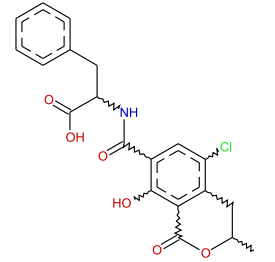 |  |  |
| Actual Endpoint (-log C)    | 6.28396                                                                             | 2.82494                                                                             | 2.54455                                                                             |
| Predicted Endpoint (-log C) | 5.12358                                                                             | 3.0705                                                                              | 3.9702                                                                              |
| Distance                    | 0.758                                                                               | 0.997                                                                               | 1.159                                                                               |
| Reference                   | NCI/NTP TR-358                                                                      | NCI/NTP TR-138                                                                      | NCI/NTP TR-336                                                                      |

## Model Applicability

Unknown features are fingerprint features in the query molecule, but not found or appearing too infrequently in the training set.

1. Molecular\_Weight out of range. Value: 464.82. Training min, max, mean, SD: 68.074, 434.63, 171.13, 85.06.
2. Num\_AromaticRings out of range. Value: 3. Training min, max, mean, SD: 0, 2, 0.5625, 0.693.
3. OPS\_PC5 out of range. Value: -3.5737. Training min, max, SD, explained variance: -3.4, 4.1587, 1.489, 0.0686.
4. OPS\_PC7 out of range. Value: -3.8342. Training min, max, SD, explained variance: -2.8003, 2.9332, 1.16, 0.0416.
5. Unknown FCFP\_2 feature: 1499521844: [\*]NC(=O)N[\*]
6. Unknown FCFP\_2 feature: -1029533685: [\*]:[c](:[\*])C(F)(F)F
7. Unknown FCFP\_2 feature: 136686699: [\*]NC

## Feature Contribution

### Top features for positive contribution

| Fingerprint | Bit/Smiles | Feature Structure | Score |
|-------------|------------|-------------------|-------|
|             |            |                   |       |

|                                               |                   |                                                                                                                                         |              |
|-----------------------------------------------|-------------------|-----------------------------------------------------------------------------------------------------------------------------------------|--------------|
| FCFP_2                                        | 332760439         | 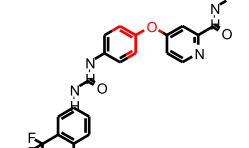<br><chem>[*]N([*])[c](:[cH]:[*]:[cH]:[*])</chem>    | 0.672        |
| FCFP_2                                        | 32                | <br><chem>[*]Cl</chem>                               | 0.526        |
| FCFP_2                                        | 1                 | <br><chem>[*]=O</chem>                               | 0.511        |
| <b>Top Features for negative contribution</b> |                   |                                                                                                                                         |              |
| <b>Fingerprint</b>                            | <b>Bit/Smiles</b> | <b>Feature Structure</b>                                                                                                                | <b>Score</b> |
| FCFP_2                                        | 203677720         | <br><chem>[*]C(=[*])[c](:[cH]:[*]:[cH]:[*])</chem> | -0.406       |
| FCFP_2                                        | 1872154524        | <br><chem>[*]C(=O)[*]</chem>                       | -0.307       |

|        |   |                                                                                                                   |       |
|--------|---|-------------------------------------------------------------------------------------------------------------------|-------|
| FCFP_2 | 0 | 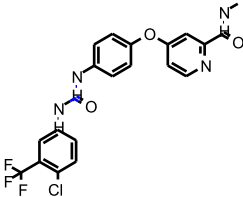<br><chem>[*]C(=[*])[*]</chem> | -0.29 |
|--------|---|-------------------------------------------------------------------------------------------------------------------|-------|

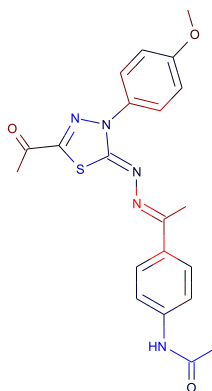

$C_{21}H_{21}N_5O_3S$

Molecular Weight: 423.48813

ALogP: 3.064

Rotatable Bonds: 6

Acceptors: 8

Donors: 1

### Model Prediction

Prediction: 0.308

Unit: g/kg\_body\_weight

Mahalanobis Distance: 23.6

Mahalanobis Distance p-value: 1.39e-023

Mahalanobis Distance: The Mahalanobis distance (MD) is a generalization of the Euclidean distance that accounts for correlations among the X properties. It is calculated as the distance to the center of the training data. The larger the MD, the less trustworthy the prediction.

Mahalanobis Distance p-value: The p-value gives the fraction of training data with an MD greater than or equal to the one for the given sample, assuming normally distributed data. The smaller the p-value, the less trustworthy the prediction. For highly non-normal X properties (e.g., fingerprints), the MD p-value is wildly inaccurate.

### Structural Similar Compounds

| Name                        | PYRAZOPHOS       | ETHYL-bis-COUMACETATE | PRASOZIN .HCI (HCI STRIPPED) |
|-----------------------------|------------------|-----------------------|------------------------------|
| Structure                   |                  |                       |                              |
| Actual Endpoint (-log C)    | 3.234            | 2.687                 | 2.294                        |
| Predicted Endpoint (-log C) | 3.35181          | 2.7054                | 3.00765                      |
| Distance                    | 0.644            | 0.647                 | 0.654                        |
| Reference                   | KHZDAN 23;538;80 | FEPRA7 10;303;51      | NIIRDN 6;688;82              |

### Model Applicability

Unknown features are fingerprint features in the query molecule, but not found or appearing too infrequently in the training set.

1. All properties and OPS components are within expected ranges.
2. Unknown ECFP\_2 feature: 128986386: [\*]N=C(/C)\[c](:[\*]):[\*]
3. Unknown ECFP\_2 feature: 562081661: [\*]C(=NN=[\*])[\*]
4. Unknown ECFP\_2 feature: -819426257: [\*]C(=NN=[\*])[\*]
5. Unknown ECFP\_2 feature: 189949281: [\*]N=C\1/S[\*]=[\*]N1[\*]
6. Unknown ECFP\_2 feature: -934225701: [\*]C(=[\*])C1=N[\*][\*]S1
7. Unknown FCFP\_6 feature: 16: [\*]:[cH]:[\*]
8. Unknown FCFP\_6 feature: 1618154665: [\*][c](:[\*]):[cH]:[cH]:[\*]
9. Unknown FCFP\_6 feature: 580960234: [\*]C(=NN=[\*])[\*]
10. Unknown FCFP\_6 feature: 675799546: [\*]=C1[\*][\*]=NN1[c](:[\*]):[\*]

### Feature Contribution

#### Top features for positive contribution

| Fingerprint | Bit/Smiles | Feature Structure | Score |
|-------------|------------|-------------------|-------|
|             |            |                   |       |

|                                               |                   |                                                                                                                          |              |
|-----------------------------------------------|-------------------|--------------------------------------------------------------------------------------------------------------------------|--------------|
| ECFP_6                                        | 642810091         | 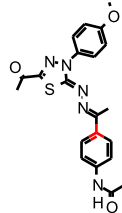<br>[*][c](:[*]):[*]                  | 0.281        |
| ECFP_6                                        | -1897341097       | <br>[*]N[*]                           | 0.216        |
| FCFP_6                                        | 136627117         | <br>[*]OC                             | 0.17         |
| <b>Top Features for negative contribution</b> |                   |                                                                                                                          |              |
| <b>Fingerprint</b>                            | <b>Bit/Smiles</b> | <b>Feature Structure</b>                                                                                                 | <b>Score</b> |
| ECFP_6                                        | -176455838        | <br>[*]O[c](:[cH]:[*]):[c<br>H]:[*] | -0.257       |
| ECFP_6                                        | 655739385         | <br>[*]N=[*]                        | -0.239       |

|        |           |                                                                                                                                                                                                                                                                                                                                                                                                                                                                                                                                                                                                                                          |        |
|--------|-----------|------------------------------------------------------------------------------------------------------------------------------------------------------------------------------------------------------------------------------------------------------------------------------------------------------------------------------------------------------------------------------------------------------------------------------------------------------------------------------------------------------------------------------------------------------------------------------------------------------------------------------------------|--------|
| FCFP_6 | 566058135 | 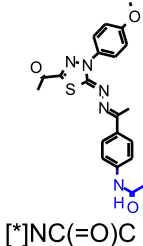 <p>The chemical structure shows a central carbon atom double-bonded to a nitrogen atom (N) and single-bonded to a sulfur atom (S). The sulfur atom is further bonded to a methyl group (CH<sub>3</sub>) and a phenyl ring. The nitrogen atom is bonded to a phenyl ring. The phenyl ring attached to the sulfur atom has a hydroxyl group (OH) at the para position. The phenyl ring attached to the nitrogen atom has a methoxy group (OCH<sub>3</sub>) at the para position. The label <chem>[*]NC(=O)C</chem> is located below the structure.</p> | -0.216 |
|--------|-----------|------------------------------------------------------------------------------------------------------------------------------------------------------------------------------------------------------------------------------------------------------------------------------------------------------------------------------------------------------------------------------------------------------------------------------------------------------------------------------------------------------------------------------------------------------------------------------------------------------------------------------------------|--------|

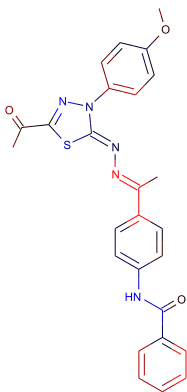

$C_{26}H_{23}N_5O_3S$

Molecular Weight: 485.55751

ALogP: 4.728

Rotatable Bonds: 7

Acceptors: 8

Donors: 1

### Model Prediction

Prediction: 0.211

Unit: g/kg\_body\_weight

Mahalanobis Distance: 23.5

Mahalanobis Distance p-value: 3.37e-023

Mahalanobis Distance: The Mahalanobis distance (MD) is a generalization of the Euclidean distance that accounts for correlations among the X properties. It is calculated as the distance to the center of the training data. The larger the MD, the less trustworthy the prediction.

Mahalanobis Distance p-value: The p-value gives the fraction of training data with an MD greater than or equal to the one for the given sample, assuming normally distributed data. The smaller the p-value, the less trustworthy the prediction. For highly non-normal X properties (e.g., fingerprints), the MD p-value is wildly inaccurate.

### Structural Similar Compounds

| Name                        | ACEMETACIN        | bis-OXATIN ACETATE | 1-ACETYL-3;3-bis-[4-(ACETYLOXY)PHENYL]-1;3-DIHYDRO-2H-INDOL-2-ONE |
|-----------------------------|-------------------|--------------------|-------------------------------------------------------------------|
| Structure                   |                   |                    |                                                                   |
| Actual Endpoint (-log C)    | 4.235             | 1.717              | 2.948                                                             |
| Predicted Endpoint (-log C) | 3.39415           | 2.40947            | 2.6866                                                            |
| Distance                    | 0.651             | 0.663              | 0.698                                                             |
| Reference                   | ARZNAD 30;1398;80 | NIIRDN 6;609;82    | JAPMA8 42;468;53                                                  |

### Model Applicability

Unknown features are fingerprint features in the query molecule, but not found or appearing too infrequently in the training set.

1. All properties and OPS components are within expected ranges.
2. Unknown ECFP\_2 feature: 128986386: [\*]N=C(/C)\[c](:[\*]):[\*]
3. Unknown ECFP\_2 feature: 562081661: [\*]C(=NN=[\*])[\*]
4. Unknown ECFP\_2 feature: -819426257: [\*]C(=NN=[\*])[\*]
5. Unknown ECFP\_2 feature: 189949281: [\*]N=C\1/S[\*]=[\*]N1[\*]
6. Unknown ECFP\_2 feature: -934225701: [\*]C(=[\*])C1=N[\*][\*]S1
7. Unknown FCFP\_6 feature: 16: [\*]:[cH]:[\*]
8. Unknown FCFP\_6 feature: 1618154665: [\*][c](:[\*]):[cH]:[cH]:[\*]
9. Unknown FCFP\_6 feature: 580960234: [\*]C(=NN=[\*])[\*]
10. Unknown FCFP\_6 feature: 675799546: [\*]=C1[\*][\*]=NN1[c](:[\*]):[\*]

### Feature Contribution

#### Top features for positive contribution

| Fingerprint | Bit/Smiles | Feature Structure | Score |
|-------------|------------|-------------------|-------|
|             |            |                   |       |

|                                               |                   |                                                                                                                             |              |
|-----------------------------------------------|-------------------|-----------------------------------------------------------------------------------------------------------------------------|--------------|
| ECFP_6                                        | 642810091         | 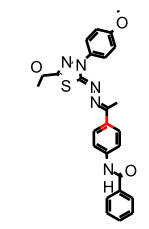<br>[*][c](:[*]):[*]                      | 0.281        |
| ECFP_6                                        | -1897341097       | <br>[*]N[*]                              | 0.216        |
| ECFP_6                                        | 1571214559        | <br>[*]1:[cH]:[cH]:[cH]:[cH]:[cH]:[cH]:1 | 0.19         |
| <b>Top Features for negative contribution</b> |                   |                                                                                                                             |              |
| <b>Fingerprint</b>                            | <b>Bit/Smiles</b> | <b>Feature Structure</b>                                                                                                    | <b>Score</b> |
| ECFP_6                                        | -176455838        | <br>[*]O[c](:[cH]:[*]):[cH]:[*]        | -0.257       |
| ECFP_6                                        | 655739385         | <br>[*]N=[*]                           | -0.239       |



|        |           |                                                                                             |        |
|--------|-----------|---------------------------------------------------------------------------------------------|--------|
| ECFP_6 | 734603939 | 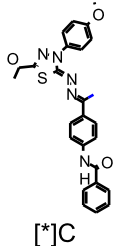<br>[*]C | -0.201 |
|--------|-----------|---------------------------------------------------------------------------------------------|--------|

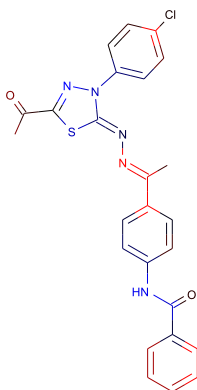

C<sub>25</sub>H<sub>20</sub>ClN<sub>5</sub>O<sub>2</sub>S

Molecular Weight: 489.97659

ALogP: 5.409

Rotatable Bonds: 6

Acceptors: 7

Donors: 1

### Model Prediction

Prediction: 0.343

Unit: g/kg\_body\_weight

Mahalanobis Distance: 23.7

Mahalanobis Distance p-value: 3.46e-024

Mahalanobis Distance: The Mahalanobis distance (MD) is a generalization of the Euclidean distance that accounts for correlations among the X properties. It is calculated as the distance to the center of the training data. The larger the MD, the less trustworthy the prediction.

Mahalanobis Distance p-value: The p-value gives the fraction of training data with an MD greater than or equal to the one for the given sample, assuming normally distributed data. The smaller the p-value, the less trustworthy the prediction. For highly non-normal X properties (e.g., fingerprints), the MD p-value is wildly inaccurate.

### Structural Similar Compounds

| Name                        | ACEMETACIN        | TALNIFLUMATE     | bis-OXATIN ACETATE |
|-----------------------------|-------------------|------------------|--------------------|
| Structure                   |                   |                  |                    |
| Actual Endpoint (-log C)    | 4.235             | 1.538            | 1.717              |
| Predicted Endpoint (-log C) | 3.39415           | 2.82541          | 2.40947            |
| Distance                    | 0.630             | 0.639            | 0.662              |
| Reference                   | ARZNAD 30;1398;80 | FRPSAX 36;372;81 | NIIRDN 6;609;82    |

### Model Applicability

Unknown features are fingerprint features in the query molecule, but not found or appearing too infrequently in the training set.

1. All properties and OPS components are within expected ranges.
2. Unknown ECFP\_2 feature: 128986386: [\*]\N=C(/C)\[c](:[\*]):[\*]
3. Unknown ECFP\_2 feature: 562081661: [\*]C(=NN=[\*])[\*]
4. Unknown ECFP\_2 feature: -819426257: [\*]C(=NN=[\*])[\*]
5. Unknown ECFP\_2 feature: 189949281: [\*]\N=C\1/S[\*]=[\*]N1[\*]
6. Unknown ECFP\_2 feature: -934225701: [\*]C(=[\*])C1=N[\*][\*]S1
7. Unknown FCFP\_6 feature: 16: [\*]:[cH]:[\*]
8. Unknown FCFP\_6 feature: 1618154665: [\*][c](:[\*]):[cH]:[cH]:[\*]
9. Unknown FCFP\_6 feature: 580960234: [\*]C(=NN=[\*])[\*]
10. Unknown FCFP\_6 feature: 675799546: [\*]=C1[\*][\*]=NN1[c](:[\*]):[\*]
11. Unknown FCFP\_6 feature: 71476542: [\*]:[c](:[\*])Cl

### Feature Contribution

#### Top features for positive contribution

| Fingerprint | Bit/Smiles | Feature Structure | Score |
|-------------|------------|-------------------|-------|
|             |            |                   |       |

| ECFP_6                                 | 642810091   | 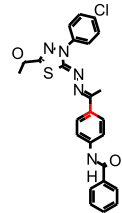<br>[*][c](:[*]):[*]                     | 0.281  |
|----------------------------------------|-------------|-----------------------------------------------------------------------------------------------------------------------------|--------|
| ECFP_6                                 | -1897341097 | <br>[*]N[*]                              | 0.216  |
| ECFP_6                                 | 1571214559  | <br>[*]1:[cH]:[cH]:[cH]:[cH]:[cH]:[cH]:1 | 0.19   |
| Top Features for negative contribution |             |                                                                                                                             |        |
| Fingerprint                            | Bit/Smiles  | Feature Structure                                                                                                           | Score  |
| ECFP_6                                 | -817402818  | <br>[*]Cl                              | -0.263 |
| ECFP_6                                 | 655739385   | <br>[*]N=[*]                           | -0.239 |

|        |           |                                                                                             |        |
|--------|-----------|---------------------------------------------------------------------------------------------|--------|
| ECFP_6 | 734603939 | 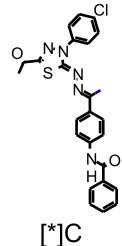<br>[*]C | -0.201 |
|--------|-----------|---------------------------------------------------------------------------------------------|--------|

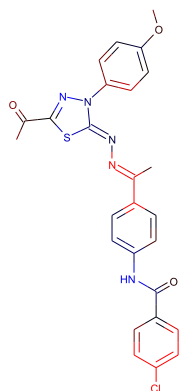

$C_{26}H_{22}ClN_5O_3S$

Molecular Weight: 520.00258

ALogP: 5.392

Rotatable Bonds: 7

Acceptors: 8

Donors: 1

### Model Prediction

Prediction: 0.148

Unit: g/kg\_body\_weight

Mahalanobis Distance: 23.8

Mahalanobis Distance p-value: 1.55e-024

Mahalanobis Distance: The Mahalanobis distance (MD) is a generalization of the Euclidean distance that accounts for correlations among the X properties. It is calculated as the distance to the center of the training data. The larger the MD, the less trustworthy the prediction.

Mahalanobis Distance p-value: The p-value gives the fraction of training data with an MD greater than or equal to the one for the given sample, assuming normally distributed data. The smaller the p-value, the less trustworthy the prediction. For highly non-normal X properties (e.g., fingerprints), the MD p-value is wildly inaccurate.

### Structural Similar Compounds

| Name                        | ACEMETACIN        | RESERPINE        | bis-OXATIN ACETATE |
|-----------------------------|-------------------|------------------|--------------------|
| Structure                   |                   |                  |                    |
| Actual Endpoint (-log C)    | 4.235             | 3.161            | 1.717              |
| Predicted Endpoint (-log C) | 3.39415           | 2.72801          | 2.40947            |
| Distance                    | 0.678             | 0.704            | 0.736              |
| Reference                   | ARZNAD 30;1398;80 | PSSCBG 11;555;80 | NIIRDN 6;609;82    |

### Model Applicability

Unknown features are fingerprint features in the query molecule, but not found or appearing too infrequently in the training set.

1. All properties and OPS components are within expected ranges.
2. Unknown ECFP\_2 feature: 128986386: [\*]\N=C(/C)\[c](:[\*]):[\*]
3. Unknown ECFP\_2 feature: 562081661: [\*]C(=NN=[\*])[\*]
4. Unknown ECFP\_2 feature: -819426257: [\*]C(=NN=[\*])[\*]
5. Unknown ECFP\_2 feature: 189949281: [\*]\N=C\1/S[\*]=[\*]N1[\*]
6. Unknown ECFP\_2 feature: -934225701: [\*]C(=[\*])C1=N[\*][\*]S1
7. Unknown FCFP\_6 feature: 16: [\*]:[cH]:[\*]
8. Unknown FCFP\_6 feature: 1618154665: [\*][c](:[\*]):[cH]:[cH]:[\*]
9. Unknown FCFP\_6 feature: 580960234: [\*]C(=NN=[\*])[\*]
10. Unknown FCFP\_6 feature: 675799546: [\*]=C1[\*][\*]=NN1[c](:[\*]):[\*]
11. Unknown FCFP\_6 feature: 71476542: [\*]:[c](:[\*])Cl

### Feature Contribution

#### Top features for positive contribution

| Fingerprint | Bit/Smiles | Feature Structure | Score |
|-------------|------------|-------------------|-------|
|             |            |                   |       |

| ECFP_6                                 | 642810091   | 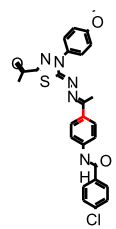<br>[*][c](:[*]):[*]                                     | 0.281  |
|----------------------------------------|-------------|--------------------------------------------------------------------------------------------------------------------------------------------|--------|
| ECFP_6                                 | -1897341097 | <br>[*]N[*]                                             | 0.216  |
| FCFP_6                                 | -149636017  | <br>[*]C(=[*])[c]1:[cH]<br>cH]:[c](Cl):[cH]:[cH]<br>]:1 | 0.193  |
| Top Features for negative contribution |             |                                                                                                                                            |        |
| Fingerprint                            | Bit/Smiles  | Feature Structure                                                                                                                          | Score  |
| ECFP_6                                 | -817402818  | <br>[*]Cl                                              | -0.263 |
| ECFP_6                                 | -176455838  | <br>[*]O[c](:[cH]:[*]):[c]<br>H]:[*]                  | -0.257 |

|        |           |                                                                                                 |        |
|--------|-----------|-------------------------------------------------------------------------------------------------|--------|
| ECFP_6 | 655739385 | 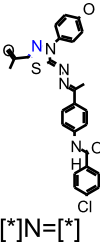<br>[*]N=[*] | -0.239 |
|--------|-----------|-------------------------------------------------------------------------------------------------|--------|

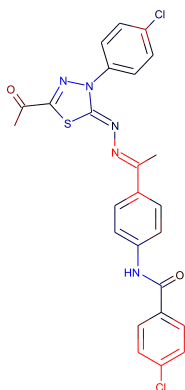

$C_{25}H_{19}Cl_2N_5O_2S$

Molecular Weight: 524.42166

ALogP: 6.073

Rotatable Bonds: 6

Acceptors: 7

Donors: 1

## Model Prediction

Prediction: 0.292

Unit: g/kg\_body\_weight

Mahalanobis Distance: 23.8

Mahalanobis Distance p-value: 7.26e-025

Mahalanobis Distance: The Mahalanobis distance (MD) is a generalization of the Euclidean distance that accounts for correlations among the X properties. It is calculated as the distance to the center of the training data. The larger the MD, the less trustworthy the prediction.

Mahalanobis Distance p-value: The p-value gives the fraction of training data with an MD greater than or equal to the one for the given sample, assuming normally distributed data. The smaller the p-value, the less trustworthy the prediction. For highly non-normal X properties (e.g., fingerprints), the MD p-value is wildly inaccurate.

## Structural Similar Compounds

| Name                        | TALNIFLUMATE     | ACEMETACIN        | bis-OXATIN ACETATE |
|-----------------------------|------------------|-------------------|--------------------|
| Structure                   |                  |                   |                    |
| Actual Endpoint (-log C)    | 1.538            | 4.235             | 1.717              |
| Predicted Endpoint (-log C) | 2.82541          | 3.39415           | 2.40947            |
| Distance                    | 0.699            | 0.704             | 0.748              |
| Reference                   | FRPSAX 36;372;81 | ARZNAD 30;1398;80 | NIIRDN 6;609;82    |

## Model Applicability

Unknown features are fingerprint features in the query molecule, but not found or appearing too infrequently in the training set.

1. All properties and OPS components are within expected ranges.
2. Unknown ECFP\_2 feature: 128986386: [\*]\N=C(/C)\[c](:[\*]):[\*]
3. Unknown ECFP\_2 feature: 562081661: [\*]C(=NN=[\*])[\*]
4. Unknown ECFP\_2 feature: -819426257: [\*]C(=NN=[\*])[\*]
5. Unknown ECFP\_2 feature: 189949281: [\*]\N=C\1/S[\*]=[\*]N1[\*]
6. Unknown ECFP\_2 feature: -934225701: [\*]C(=[\*])C1=N[\*][\*]S1
7. Unknown FCFP\_6 feature: 16: [\*]:[cH]:[\*]
8. Unknown FCFP\_6 feature: 1618154665: [\*][c](:[\*]):[cH]:[cH]:[\*]
9. Unknown FCFP\_6 feature: 580960234: [\*]C(=NN=[\*])[\*]
10. Unknown FCFP\_6 feature: 675799546: [\*]=C1[\*][\*]=NN1[c](:[\*]):[\*]
11. Unknown FCFP\_6 feature: 71476542: [\*]:[c](:[\*])Cl

## Feature Contribution

### Top features for positive contribution

| Fingerprint | Bit/Smiles | Feature Structure | Score |
|-------------|------------|-------------------|-------|
|             |            |                   |       |



|                                               |                   |                                                                                                                                         |              |
|-----------------------------------------------|-------------------|-----------------------------------------------------------------------------------------------------------------------------------------|--------------|
| ECFP_6                                        | 642810091         | 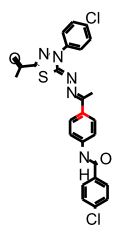<br>[*][c](:[*]):[*]                                  | 0.281        |
| ECFP_6                                        | -1897341097       | <br>[*]N[*]                                          | 0.216        |
| FCFP_6                                        | -149636017        | <br>[*]C(=[*])[c]1:[cH]1:<br>cH]:[c](Cl):[cH]:[cH]:1 | 0.193        |
| <b>Top Features for negative contribution</b> |                   |                                                                                                                                         |              |
| <b>Fingerprint</b>                            | <b>Bit/Smiles</b> | <b>Feature Structure</b>                                                                                                                | <b>Score</b> |
| ECFP_6                                        | -817402818        | <br>[*]Cl                                           | -0.263       |
| ECFP_6                                        | 655739385         | <br>[*]N=[*]                                       | -0.239       |

|        |           |                                                                                             |        |
|--------|-----------|---------------------------------------------------------------------------------------------|--------|
| ECFP_6 | 734603939 | 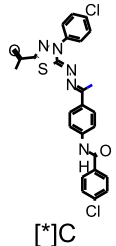<br>[*]C | -0.201 |
|--------|-----------|---------------------------------------------------------------------------------------------|--------|

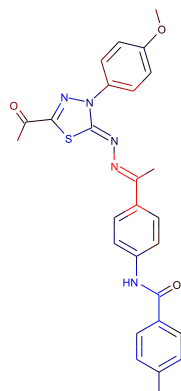

$C_{27}H_{25}N_5O_3S$

Molecular Weight: 499.58409

ALogP: 5.214

Rotatable Bonds: 7

Acceptors: 8

Donors: 1

### Model Prediction

Prediction: 0.358

Unit: g/kg\_body\_weight

Mahalanobis Distance: 23.6

Mahalanobis Distance p-value: 9.56e-024

Mahalanobis Distance: The Mahalanobis distance (MD) is a generalization of the Euclidean distance that accounts for correlations among the X properties. It is calculated as the distance to the center of the training data. The larger the MD, the less trustworthy the prediction.

Mahalanobis Distance p-value: The p-value gives the fraction of training data with an MD greater than or equal to the one for the given sample, assuming normally distributed data. The smaller the p-value, the less trustworthy the prediction. For highly non-normal X properties (e.g., fingerprints), the MD p-value is wildly inaccurate.

### Structural Similar Compounds

| Name                        | ACEMETACIN        | bis-OXATIN ACETATE | RESERPINE        |
|-----------------------------|-------------------|--------------------|------------------|
| Structure                   |                   |                    |                  |
| Actual Endpoint (-log C)    | 4.235             | 1.717              | 3.161            |
| Predicted Endpoint (-log C) | 3.39415           | 2.40947            | 2.72801          |
| Distance                    | 0.678             | 0.703              | 0.714            |
| Reference                   | ARZNAD 30;1398;80 | NIIRDN 6;609;82    | PSSCBG 11;555;80 |

### Model Applicability

Unknown features are fingerprint features in the query molecule, but not found or appearing too infrequently in the training set.

1. All properties and OPS components are within expected ranges.
2. Unknown ECFP\_2 feature: 128986386: [\*]\N=C(/C)\[c](:[\*]):[\*]
3. Unknown ECFP\_2 feature: 562081661: [\*]C(=NN=[\*])[\*]
4. Unknown ECFP\_2 feature: -819426257: [\*]C(=NN=[\*])[\*]
5. Unknown ECFP\_2 feature: 189949281: [\*]\N=C\1/S[\*]=[\*]N1[\*]
6. Unknown ECFP\_2 feature: -934225701: [\*]C(=[\*])C1=N[\*][\*]S1
7. Unknown FCFP\_6 feature: 16: [\*]:[cH]:[\*]
8. Unknown FCFP\_6 feature: 1618154665: [\*][c](:[\*]):[cH]:[cH]:[\*]
9. Unknown FCFP\_6 feature: 580960234: [\*]C(=NN=[\*])[\*]
10. Unknown FCFP\_6 feature: 675799546: [\*]=C1[\*][\*]=NN1[c](:[\*]):[\*]

### Feature Contribution

#### Top features for positive contribution

| Fingerprint | Bit/Smiles | Feature Structure | Score |
|-------------|------------|-------------------|-------|
|             |            |                   |       |

|                                               |                   |                                                                                                                         |              |
|-----------------------------------------------|-------------------|-------------------------------------------------------------------------------------------------------------------------|--------------|
| ECFP_6                                        | 642810091         | 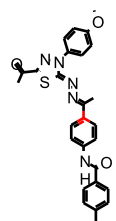<br>[*][c](:[*]):[*]                  | 0.281        |
| ECFP_6                                        | -1897341097       | <br>[*]N[*]                          | 0.216        |
| FCFP_6                                        | 136627117         | <br>[*]OC                            | 0.17         |
| <b>Top Features for negative contribution</b> |                   |                                                                                                                         |              |
| <b>Fingerprint</b>                            | <b>Bit/Smiles</b> | <b>Feature Structure</b>                                                                                                | <b>Score</b> |
| ECFP_6                                        | -176455838        | <br>[*]O[c](:[cH]:[*]):[c<br>H]:[*] | -0.257       |
| ECFP_6                                        | 655739385         | <br>[*]N=[*]                       | -0.239       |

|        |           |                                                                                             |        |
|--------|-----------|---------------------------------------------------------------------------------------------|--------|
| ECFP_6 | 734603939 | 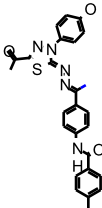<br>[*]C | -0.201 |
|--------|-----------|---------------------------------------------------------------------------------------------|--------|

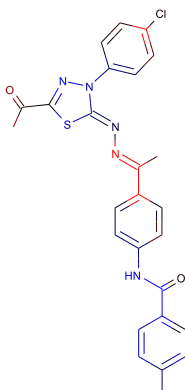

$C_{26}H_{22}ClN_5O_2S$

Molecular Weight: 504.00318

ALogP: 5.895

Rotatable Bonds: 6

Acceptors: 7

Donors: 1

### Model Prediction

Prediction: 0.581

Unit: g/kg\_body\_weight

Mahalanobis Distance: 23.8

Mahalanobis Distance p-value: 1.2e-024

Mahalanobis Distance: The Mahalanobis distance (MD) is a generalization of the Euclidean distance that accounts for correlations among the X properties. It is calculated as the distance to the center of the training data. The larger the MD, the less trustworthy the prediction.

Mahalanobis Distance p-value: The p-value gives the fraction of training data with an MD greater than or equal to the one for the given sample, assuming normally distributed data. The smaller the p-value, the less trustworthy the prediction. For highly non-normal X properties (e.g., fingerprints), the MD p-value is wildly inaccurate.

### Structural Similar Compounds

| Name                        | TALNIFLUMATE     | ACEMETACIN        | bis-OXATIN ACETATE |
|-----------------------------|------------------|-------------------|--------------------|
| Structure                   |                  |                   |                    |
| Actual Endpoint (-log C)    | 1.538            | 4.235             | 1.717              |
| Predicted Endpoint (-log C) | 2.82541          | 3.39415           | 2.40947            |
| Distance                    | 0.671            | 0.672             | 0.717              |
| Reference                   | FRPSAX 36;372;81 | ARZNAD 30;1398;80 | NIIRDN 6;609;82    |

### Model Applicability

Unknown features are fingerprint features in the query molecule, but not found or appearing too infrequently in the training set.

1. All properties and OPS components are within expected ranges.
2. Unknown ECFP\_2 feature: 128986386: [\*]\N=C(/C)\[c](:[\*]):[\*]
3. Unknown ECFP\_2 feature: 562081661: [\*]C(=NN=[\*])[\*]
4. Unknown ECFP\_2 feature: -819426257: [\*]C(=NN=[\*])[\*]
5. Unknown ECFP\_2 feature: 189949281: [\*]\N=C\1/S[\*]=[\*]N1[\*]
6. Unknown ECFP\_2 feature: -934225701: [\*]C(=[\*])C1=N[\*][\*]S1
7. Unknown FCFP\_6 feature: 16: [\*]:[cH]:[\*]
8. Unknown FCFP\_6 feature: 1618154665: [\*][c](:[\*]):[cH]:[cH]:[\*]
9. Unknown FCFP\_6 feature: 580960234: [\*]C(=NN=[\*])[\*]
10. Unknown FCFP\_6 feature: 675799546: [\*]=C1[\*][\*]=NN1[c](:[\*]):[\*]
11. Unknown FCFP\_6 feature: 71476542: [\*]:[c](:[\*])Cl

### Feature Contribution

#### Top features for positive contribution

| Fingerprint | Bit/Smiles | Feature Structure | Score |
|-------------|------------|-------------------|-------|
|             |            |                   |       |

| ECFP_6                                 | 642810091   | 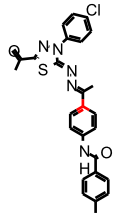<br>[*][c](:[*]):[*] | 0.281  |
|----------------------------------------|-------------|---------------------------------------------------------------------------------------------------------|--------|
| ECFP_6                                 | -1897341097 | <br>[*]N[*]          | 0.216  |
| ECFP_6                                 | 99947387    | <br>[*]:[c](:[*])Cl  | 0.181  |
| Top Features for negative contribution |             |                                                                                                         |        |
| Fingerprint                            | Bit/Smiles  | Feature Structure                                                                                       | Score  |
| ECFP_6                                 | -817402818  | <br>[*]Cl          | -0.263 |
| ECFP_6                                 | 655739385   | <br>[*]N=[*]       | -0.239 |

|        |           |                                                                                             |        |
|--------|-----------|---------------------------------------------------------------------------------------------|--------|
| ECFP_6 | 734603939 | 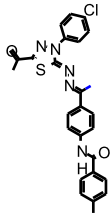<br>[*]C | -0.201 |
|--------|-----------|---------------------------------------------------------------------------------------------|--------|



# Sorafenib

TOPKAT\_Rat\_Oral\_LD50

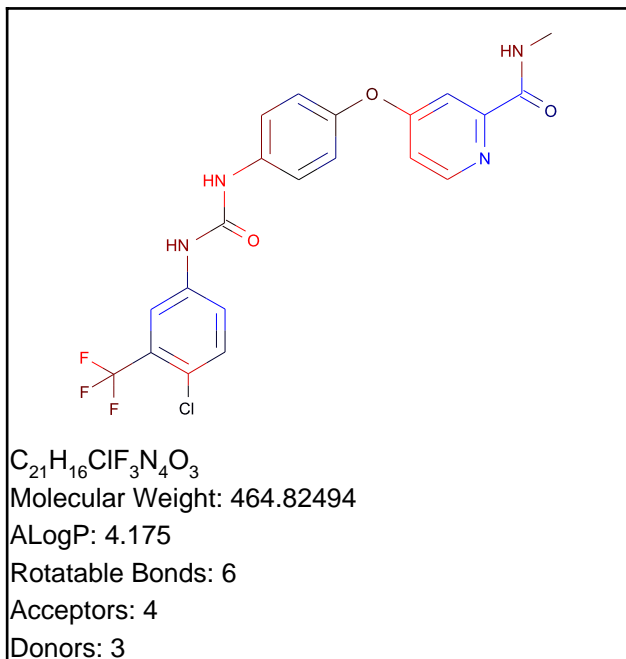

## Model Prediction

Prediction: 0.823

Unit: g/kg\_body\_weight

Mahalanobis Distance: 21

Mahalanobis Distance p-value: 1.93e-012

Mahalanobis Distance: The Mahalanobis distance (MD) is a generalization of the Euclidean distance that accounts for correlations among the X properties. It is calculated as the distance to the center of the training data. The larger the MD, the less trustworthy the prediction.

Mahalanobis Distance p-value: The p-value gives the fraction of training data with an MD greater than or equal to the one for the given sample, assuming normally distributed data. The smaller the p-value, the less trustworthy the prediction. For highly non-normal X properties (e.g., fingerprints), the MD p-value is wildly inaccurate.

## Structural Similar Compounds

| Name                        | FLUBENDAZOLE                                                                        | PHOSPHORAMIDOTHIOIC ACID; ACETIMIDOYL-; O; O-bis-(p-CHLOROPHENYL)ESTER              | BEZAFIBRATE                                                                         |
|-----------------------------|-------------------------------------------------------------------------------------|-------------------------------------------------------------------------------------|-------------------------------------------------------------------------------------|
| Structure                   | 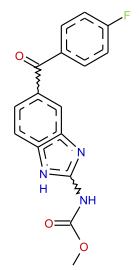 |  |  |
| Actual Endpoint (-log C)    | 2.088                                                                               | 5.006                                                                               | 1.946                                                                               |
| Predicted Endpoint (-log C) | 2.69288                                                                             | 3.23989                                                                             | 2.54395                                                                             |
| Distance                    | 0.697                                                                               | 0.703                                                                               | 0.721                                                                               |
| Reference                   | YRTMA6 9;11;78                                                                      | FMCHA2 -;C149;89                                                                    | ARZNAD 30;2023;80                                                                   |

## Model Applicability

Unknown features are fingerprint features in the query molecule, but not found or appearing too infrequently in the training set.

1. All properties and OPS components are within expected ranges.
2. Unknown FCFP\_6 feature: 16: [\*]:[cH]:[\*]
3. Unknown FCFP\_6 feature: 71476542: [\*]:[c](:[\*])Cl
4. Unknown FCFP\_6 feature: 1747237384: [\*][c](:[\*]):n:[cH]:[\*]
5. Unknown FCFP\_6 feature: 1618154665: [\*][c](:[\*]):[cH]:[cH]:[\*]
6. Unknown FCFP\_6 feature: 136686699: [\*]NC

## Feature Contribution

### Top features for positive contribution

| Fingerprint | Bit/Smiles | Feature Structure | Score |
|-------------|------------|-------------------|-------|
|             |            |                   |       |

|                                               |                   |                                                                                                    |              |
|-----------------------------------------------|-------------------|----------------------------------------------------------------------------------------------------|--------------|
| FCFP_6                                        | 71953198          | 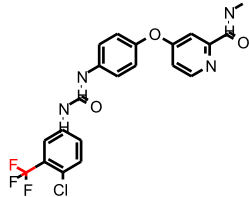<br>[*]C[*]F    | 0.392        |
| ECFP_6                                        | -1046436026       | <br>[*]F        | 0.349        |
| ECFP_6                                        | 642810091         | <br>[*]c[*]:[*] | 0.281        |
| <b>Top Features for negative contribution</b> |                   |                                                                                                    |              |
| <b>Fingerprint</b>                            | <b>Bit/Smiles</b> | <b>Feature Structure</b>                                                                           | <b>Score</b> |
| ECFP_6                                        | 226796801         | <br>[*]C[*]F   | -0.32        |
| ECFP_6                                        | -817402818        | <br>[*]Cl     | -0.263       |

|        |            |                                                                                                                                                                                                       |        |
|--------|------------|-------------------------------------------------------------------------------------------------------------------------------------------------------------------------------------------------------|--------|
| ECFP_6 | -176455838 | 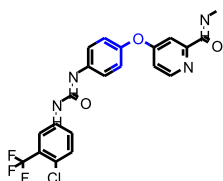<br><chem>C1=NC2=C(N1)C=CC=C2C3=CC=C(C=C3)C(F)FClC4=CC=C(C=C4)N5C=CC=C5C6=CC=C(C=C6)OC7=CC=C(C=C7)N8C=CC=C8</chem> | -0.257 |
|--------|------------|-------------------------------------------------------------------------------------------------------------------------------------------------------------------------------------------------------|--------|
